# Supplementary material for: The RSC (Remodels the Structure of Chromatin) complex of Candida albicans shows compositional divergence with distinct roles in regulating pathogenic traits
Source: PLoS Genet. 2020 Nov 5;16(11):e1009071. doi: 10.1371/journal.pgen.1009071 (PMC7671503; doi:10.1371/journal.pgen.1009071)
Supplement: S1 Table — (XLSX) [file pgen.1009071.s010.xlsx]

## Sheet: Fig 1B data-Sth1-Myc 
Significant	-Log(P-value)	Log2 Fold change	Protein ID (Uniprot)	Standard protein name	Peptides	Razor + unique peptides	Unique peptides	Sequence coverage [%]	Mol. weight [kDa]	Systematic gene name	Standard name	Description
+	3.68042	9.46453	A0A1D8PJG4;A0A1D8PGK4	Sth1; Snf2	33	33	33	28.6	149.8	C3_02490C_A	C3_02490C_A	Putative ATP-dependent helicase; induced by nitric oxide
+	3.85169	8.713	A0A1D8PCV8	Rsc1	17	17	17	27.4	89.914	C1_02750C_A	C1_02750C_A	Ortholog(s) have DNA translocase activity
+	3.02578	8.33579	A0A1D8PFW3	Rsc8	18	18	18	37.3	64.302	C1_14240W_A	C1_14240W_A	Putative RSC chromatin remodeling complex component; possibly an essential gene, disruptants not obtained by UAU1 method
+	3.56696	7.63062	A0A1D8PG45	Rsc58	11	11	11	27.1	63.967	C2_00570W_A	C2_00570W_A	Ortholog(s) have DNA translocase activity, role in chromatin remodeling, nucleosome disassembly, transcription elongation from RNA polymerase II promoter and RSC-type complex localization
+	3.39418	7.51738	A0A1D8PG88	Rsc4	12	12	12	20.3	71.992	C2_00830C_A	C2_00830C_A	Ortholog(s) have DNA translocase activity, lysine-acetylated histone binding activity and role in ATP-dependent chromatin remodeling, nucleosome disassembly, transcription elongation from RNA polymerase II promoter
+	2.74732	7.06133	Q5AA11	Rsc9	7	7	7	13.2	71.866	C1_05780W_A	C1_05780W_A	Putative RSC chromatin remodeling complex component; decreased transcription is observed upon fluphenazine treatment or in an azole-resistant strain that overexpresses CDR1 and CDR2
+	3.56186	6.61886	A0A1D8PHT4	Snf12	16	16	16	35.6	53.598	C2_07100W_A	C2_07100W_A	Ortholog(s) have DNA translocase activity and role in positive regulation of transcription by RNA polymerase II, positive regulation of transcription from RNA polymerase II promoter in response to amino acid starvation
+	2.28107	6.2354	Q5ALY5	C2_01370cp	5	5	5	8.3	72.347	C2_01370C_A	C2_01370C_A	Ortholog of C. dubliniensis CD36 : Cd36_16230, C. parapsilosis CDC317 : CPAR2_213950, C. auris B8441 : B9J08_003853 and Candida tenuis NRRL Y-1498 : CANTEDRAFT_112720
+	2.93305	6.18519	Q5A9X7	Arp9	6	6	6	14	54.639	C3_01030W_A	ARP9	Protein similar to S. cerevisiae Arp3p, a component of the Arp2/3 complex involved in actin-dependent processes; likely to be essential for growth, based on an insertional mutagenesis strategy
+	2.94787	5.67433	A0A1D8PG62	Rsc7	12	12	12	19.6	51.911	C2_00710W_A	NPL6	Putative nuclear protein localization factor; Hap43-induced; Spider biofilm repressed
+	2.85651	5.46223	A0A1D8PCZ5	Arp7	4	4	4	11.1	43.043	C1_03310W_A	C1_03310W_A	Putative DNA translocase; Spider biofilm repressed
+	3.29604	5.04486	A0A1D8PQQ5	Rps18	4	4	4	29.7	16.99	C7_00960W_A	RPS18	Predicted ribosomal protein; repressed upon phagocytosis by murine macrophage; repressed by nitric oxide; Hap43-induced; Spider biofilm repressed
+	2.66652	3.73618	Q59T87	C1_01800wp	3	3	3	15.1	26.891	C1_01800W_A	C1_01800W_A	Ortholog of C. dubliniensis CD36 : Cd36_01640, C. parapsilosis CDC317 : CPAR2_106830, C. auris B8441 : B9J08_004660 and Candida tenuis NRRL Y-1498 : cten_CGOB_00039
	1.03211	2.16967	A0A1D8PEB6	Sfh1	2	2	2	10.8	40.604	C1_08160W_A	C1_08160W_A	Ortholog(s) have DNA translocase activity
	0.626154	2.21244	A0A1D8PC97	Tub2	2	2	2	7.3	49.997	C1_00710C_A	TUB2	Beta-tubulin; functional homolog of ScTub2; overproduction makes S. cerevisiae inviable; has two introns; GlcNAc, hypha fluconazole-induced; slow growth, ectopic expression increases white-to opaque switch; rat catheter biofilm repressed
	0.0370448	-0.222538	A0A1D8PCJ1	Mrp20	2	2	2	7.5	34.387	C1_01600W_A	MRP20	Component of mitochondrial ribosome; decreased expression in hyphae compared to yeast-form cells
	0.121802	-0.0791473	A0A1D8PCQ5	Rpl26b	6	6	6	39.4	14.185	C1_02330C_A	C1_02330C_A	Ribosomal 60S subunit protein; Spider biofilm repressed
	1.3802	-4.24278	A0A1D8PCT0;A0A1D8PDL5;A0A1D8PRT5	Gsc1	4	4	4	2.1	218.1	C1_02420C_A	GSC1	Essential beta-1,3-glucan synthase subunit; gsc1 allele determines resistance/sensitivity to echinocandins; 16 predicted membrane-spanning regions; mRNA abundance declines after yeast-to-hypha transition; Spider biofilm induced
	0.288676	0.259602	A0A1D8PCW6	Rps16a	4	4	4	27.5	15.739	C1_03030W_A	RPS16A	Putative 40S ribosomal subunit; macrophage/pseudohyphal-induced after 16 h; Spider biofilm repressed
	0.649616	0.23122	A0A1D8PDC4	Atp1	6	6	6	13	58.984	C1_04610W_A	ATP1	ATP synthase alpha subunit; antigenic in human/mouse; at hyphal surface; ciclopirox, ketoconazole, flucytosine induced; Efg1, caspofungin repressed; may be essential; sumoylation target; stationary phase-enriched; Spider biofilm repressed
	0.000163967	-0.000851631	A0A1D8PDL6	Rpl7a	2	2	2	8.3	27.399	C1_05720W_A	C1_05720W_A	60S ribosomal protein L7; snoRNA snR39b encoded within the 2nd intron
	0.307778	0.613465	A0A1D8PDU3	Rps23a	2	2	2	12.4	15.965	C1_06580W_A	RPS23A	Putative ribosomal protein; repressed upon phagocytosis by murine macrophage; Spider biofilm repressed
	0.187336	-1.54111	A0A1D8PDZ1	Rpl34b	2	2	2	20.5	13.739	C1_06890C_A	C1_06890C_A	Ribosomal 60S subunit protein; Spider biofilm repressed
	0.170798	0.772858	A0A1D8PEM5	Idh1	4	4	4	10.4	39.173	C1_09630W_A	IDH1	Putative mitochondrial NAD-isocitrate dehydrogenase subunit 1; soluble protein in hyphae; protein level decrease in stationary phase cultures
	0.613385	0.539963	A0A1D8PF08	Rpl2	3	3	3	15.7	27.311	C1_11060C_A	RPL2	Putative 60S ribosomal protein L2; Hap43-induced gene; repressed in infected rabbit kidney in SC5314, but not NGY152, strain background; Spider biofilm repressed
	0.970171	2.98388	A0A1D8PF45	Rpl37b	2	2	2	17.8	10.076	C1_11360W_A	RPL37B	Ribosomal protein L37; Hap43-induced; Spider biofilm repressed
	0.610521	0.417199	A0A1D8PFG4	Rpl27a	4	4	4	35.3	15.514	C1_12390C_A	RPL27A	Ribosomal protein L27; Spider biofilm repressed
	0.132448	0.0964788	A0A1D8PFL9	Rpl14	3	3	3	22.1	14.721	C1_13050W_A	RPL14	Ribosomal protein L14; promoter bound directly by Tbf1p; Hap43p-induced gene
	0.39147	-0.190327	A0A1D8PFR4	Act1	7	7	7	23.1	41.738	C1_13700W_A	ACT1	Actin; gene has intron; transcript regulated by growth phase, starvation; at polarized growth site in budding and hyphal cells; required for wild-type Cdc42 localization; unprocessed N terminus; Hap43-induced; Spider biofilm repressed
	0.215325	0.130545	A0A1D8PFV1	Rpl4b	7	7	7	34.2	39.212	C1_14110C_A	RPL4B	Ribosomal protein 4B; repressed upon phagocytosis by murine macrophage; Spider biofilm repressed
	0.508842	1.59009	A0A1D8PG16	Rpl38	2	2	2	24.4	8.8924	C2_00210W_A	RPL38	60S ribosomal ribosomal protein subunit; genes encoding cytoplasmic ribosomal subunits, translation factors, tRNA synthetases are downregulated upon phagocytosis by murine macrophage
	0.626358	0.33438	A0A1D8PGY8	Rps9b	3	3	3	12.7	21.72	C2_03820C_A	RPS9B	Predicted ribosomal protein; repressed upon phagocytosis by murine macrophage; transcript possibly regulated upon hyphal formation; Spider biofilm repressed
	0.58923	0.360432	A0A1D8PH21	Rpl39	2	2	2	23.2	11.067	C2_03960W_A	RPL39	Ribosomal protein L39; transcript induced upon germ tube formation; colony morphology-related gene regulation by Ssn6; Hap43-induced
	0.142856	-0.870309	A0A1D8PHF5	Rpl31b	2	2	2	19.6	12.967	C2_05410W_A	C2_05410W_A	Ribosomal 60S subunit protein L31B; Spider biofilm repressed
	0.130356	0.642628	A0A1D8PHF8	Wh11	2	2	2	32.3	6.9956	C2_05180W_A	WH11	White-phase yeast transcript; expression in opaques increases virulence/switching; mutant switches as WT; Hap43, hypoxia, ketoconazol induced; required for RPMI biofilm; Bcr1-induced in RPMI a/a biofilm; rat catheter, Spider biofilm induced
	0.0993756	-0.0446599	A0A1D8PJ01	Pma1	3	3	3	3.9	97.537	C3_00720W_A	PMA1	Plasma membrane H(+)-ATPase; highly expressed, comprises 20-40% of total plasma membrane protein; levels increase at stationary phase transition; fluconazole induced; caspofungin repressed; upregulated in RHE model; Spider biofilm repressed
	0.35518	-1.26715	A0A1D8PK30	Rpl35	2	2	2	17.5	14.086	C3_04960W_A	RPL35	Ribosomal protein; downregulation correlates with clinical development of fluconazole resistance; colony morphology-related gene regulation by Ssn6; Hap43-induced; Spider biofilm repressed
	1.05484	0.74589	A0A1D8PK40	Rpl19a	6	6	6	25.3	21.884	C3_04500C_A	RPL19A	Ribosomal protein L19; repressed upon phagocytosis by murine macrophages; Hap43-induced gene; Spider biofilm repressed
	0.647316	0.452274	A0A1D8PK43	Rpl18	3	3	3	18.8	20.77	C3_05100C_A	RPL18	Predicted ribosomal protein; Plc1p-regulated, Tbf1-activated; repressed upon phagocytosis by murine macrophage; Hap43p-induced; Spider biofilm repressed
	0.892435	-1.1878	A0A1D8PKE0	Utr1	6	6	6	11.1	65.703	C3_06110C_A	C3_06110C_A	Predicted NAD+/NADH kinase; possible role in cellular iron ion homeostasis; Spider biofilm induced
	0.801956	-0.302308	A0A1D8PKZ9	Atp2	3	3	3	6.9	53.942	C4_00270W_A	ATP2	F1 beta subunit of F1F0 ATPase complex; antigenic in human, mice; induced by ciclopirox olamine; caspofungin repressed; macrophage/pseudohyphal-induced; detected during exponential and stationary growth phases; Spider biofilm repressed
	0.0599576	0.255405	A0A1D8PL78	Crd2	2	2	2	36.8	7.7467	C4_01160W_A	CRD2	Metallothionein; for adaptation to growth in high copper; basal transcription is cadmium-repressed; Ssn6 regulated; complements copper sensitivity of an S. cerevisiae cup1 mutant; regulated by Sef1, Sfu1, and Hap43; Spider biofilm induced
	0.51212	2.45957	A0A1D8PL99	Rps6a	6	6	6	29.2	27.086	C4_01270W_A	RPS6A	Ribosomal protein 6A; localizes to cell surface of yeast cells but not hyphae; repressed upon phagocytosis by murine macrophage; possibly essential; Hap43-induced; Spider biofilm repressed
	0.218876	1.34417	A0A1D8PLC9	Rpl20b	2	2	2	14	20.338	C4_01520C_A	RPL20B	Ribosomal protein L20; repressed upon phagocytosis by murine macrophage; alternatively spliced intron in 5' UTR; Hap43-induced; Spider biofilm repressed
	0.286576	1.53522	A0A1D8PM97	Rad59	1	1	1	4.2	24.972	C4_05270C_A	RAD59	Protein involved in homologous recombination and DNA breaks repair; similar to S. cerevisiae Rad59p; N-terminal similarity with Rad52p
	0.678476	0.617047	A0A1D8PN83	Rps11a	5	5	5	36.1	17.6	C5_01540W_A	C5_01540W_A	Protein component of the small (40S) ribosomal subunit; Spider biofilm repressed
	1.44892	2.04949	A0A1D8PP43	Adh1	3	3	3	11.1	36.909	C5_05050W_A	ADH1	Alcohol dehydrogenase; oxidizes ethanol to acetaldehyde; at yeast cell surface; immunogenic in humans/mice; complements S. cerevisiae adh1 adh2 adh3 mutant; fluconazole, farnesol-induced; flow model biofilm induced; Spider biofilm repressed
	0.885435	2.25914	A0A1D8PPE0	Rps13	2	2	2	11.9	16.946	C6_00650C_A	RPS13	Putative ribosomal protein of the small subunit
	0.515906	0.33638	A0A1D8PPN6	Rpl32	4	4	4	35.1	14.956	C6_01700W_A	RPL32	Component of the large (60S) ribosomal subunit; Spider biofilm repressed
	1.33468	1.22822	A0A1D8PQS0	Rpp0	5	5	5	19.6	33.272	C7_00990W_A	RPP0	Putative ribosomal protein; antigenic in mouse; repressed upon phagocytosis by murine macrophage; induced by Tbf1; overlaps orf19.7014; Spider biofilm repressed
	0.728843	-1.078	A0A1D8PRJ6	Sui3	2	2	2	6.8	31.079	C7_04130C_A	SUI3	Putative translation initiation factor; genes encoding ribosomal subunits, translation factors, and tRNA synthetases are downregulated upon phagocytosis by murine macrophage
	1.01464	0.475701	A0A1D8PTD1	Ura2	6	6	6	3.2	244.64	CR_07050C_A	URA2	Putative bifunctional carbamoylphosphate synthetase-aspartate transcarbamylase; flucytosine induced; macrophage/pseudohyphal-induced; 5'-UTR intron; flow model biofilm repressed
	2.30394	-1.56729	A0A1D8PTD6	Cr_06980wp	2	2	2	12.8	17.272	CR_06980W_A	CR_06980W_A	Putative protein of unknown function; Hap43-induced; repressed by Rim101; Spider biofilm induced
	1.28252	3.96342	A0A1D8PTR4	Rps29a	3	3	3	46.4	6.6005	CR_08480C_A	CR_08480C_A	Ortholog(s) have structural constituent of ribosome activity and cytosolic small ribosomal subunit localization
	0.297006	0.259123	A0A1D8PTV4	Tub1	4	4	4	10.9	49.968	CR_09120C_A	TUB1	Alpha-tubulin; gene has intron; complements cold-sensitivity of S. cerevisiae tub1 mutant; C. albicans has single alpha-tubulin gene, whereas S. cerevisiae has two (TUB1, TUB3); farnesol-upregulated in biofilm; sumoylation target
	0.491541	1.50559	A0A1D8PU46	Sik1	2	2	2	4.3	57.769	CR_09950C_A	SIK1	Putative U3 snoRNP protein; Hap43p-induced gene; physically interacts with TAP-tagged Nop1p
	0.596057	2.29376	O42817	Rps0	2	2	2	9.6	28.73	C3_05370C_A	YST1	Ribosome-associated protein; antigenic in mice; complements S. cerevisiae yst1 yst2 mutant; similar to laminin receptor; predicted S/T phosphorylation, N-glycosylation, myristoylation, Hap43-, Gcn4-regulated; Spider biofilm repressed
	0.382321	1.06801	O43101	Cbf5	3	3	3	5.4	54.321	C1_10620W_A	C1_10620W_A	Ortholog(s) have pseudouridine synthase activity
	0.927756	0.59477	O59931	Rpl13	6	6	6	31.2	23.053	C1_03020C_A	RPL13	Putative ribosomal subunit; antigenic during murine infection; downregulated upon phagocytosis by murine macrophage; Spider biofilm repressed
	0.871376	1.24616	O93827	Mpg1	7	7	7	21.8	39.975	C3_07950C_A	SRB1	Essential GDP-mannose pyrophosphorylase; makes GDP-mannose for protein glycosylation; functional in S. cerevisiae psa1; on yeast-form, not hyphal cell surface; alkaline induced; induced on adherence to polystyrene; Spider biofilm repressed
	0.86514	3.59453	P25997	Cef3	4	4	4	3.2	116.92	C5_01580C_A	CEF3	Translation elongation factor 3; antigenic in humans; predicted C-term nucleotide-binding active site; protein on surface of yeast, not hyphae; polystyrene adherence induced; higher protein amount in stationary phase; possibly essential
	1.04308	-0.592255	P41797;A0A1D8PG96	Ssa1	7	7	1	11.9	70.323	C1_13480W_A	HSP70	Putative hsp70 chaperone; role in entry into host cells; heat-shock, amphotericin B, cadmium, ketoconazole-induced; surface localized in yeast and hyphae; antigenic in host; farnesol-downregulated in biofilm; Spider biofilm induced
	1.39845	1.28876	P46598	Hsp90	9	9	9	13.6	80.822	C7_02030W_A	HSP90	Essential chaperone, regulates several signal transduction pathways and temperature-induced morphogenesis; activated by heat shock, stress; localizes to surface of hyphae, not yeast cells; mediates echinocandin and biofilm azole resistance
	0.66122	2.43117	P83774	Asc1	3	3	3	11.7	34.555	C7_01250W_A	ASC1	40S ribosomal subunit similar to G-beta subunits; glucose or N starvation induced filamentation; required for virulence in mice; snoRNA snR24 encoded in ASC1 intron; repressed in stationary phase; GlcNAc-induced; Spider biofilm repressed
	2.22908	2.96693	P87206	Tif1	14	14	14	34	44.599	C1_01350C_A	TIF	Translation initiation factor; upregulated in highly virulent strain compared to less virulent strain; antigenic in human; flucytosine induced; downregulated upon phagocytosis by macrophages; Spider biofilm repressed
	0.658461	1.01993	Q59KV8	Lsp1	3	3	3	8.8	35.59	C2_06730W_A	LSP1	Eisosome component with a predicted role in endocytosis; protein present in exponential and stationary growth phase yeast cultures; caspofungin repressed; biofilm induced; fungal-specific (no human/murine homolog); sumoylation target
	0.742217	0.242316	Q59LS1	Rpl3	3	3	3	8	43.948	C2_09430W_A	RPL3	Ribosomal protein, large subunit; induced by ciclopirox olamine treatment; genes encoding cytoplasmic ribosomal subunits are downregulated upon phagocytosis by murine macrophages; Hap43-induced gene; Spider biofilm repressed
	0.971419	2.69969	Q59P43	Gsp1	2	2	2	9.8	24.314	C2_06310C_A	GSP1	Small RAN G-protein; essential; no prenylation predicted; can rescue S. cerevisiae gsp1 viability; macrophage/pseudohyphal-induced; transcript not regulated by white-opaque, yeast-hypha switching; GlcNAc-induced; Spider biofilm repressed
	1.17405	1.11776	Q59QD6;P0CY35	Tef2	15	15	15	40.8	50.011	C1_08380W_A	TEF2	Translation elongation factor 1-alpha; genes encoding ribosomal subunits, translation factors, and tRNA synthetases are downregulated upon phagocytosis by murine macrophage
	0.0184676	-0.101419	Q59RP7	Mrpl4	2	2	2	5.5	36.363	CR_07320C_A	CR_07320C_A	Ortholog of S. cerevisiae Mrpl4, a mitochondrial ribosomal protein of the large subunit; repressed by nitric oxide
	0.24982	0.192193	Q59T44	Rps8a	3	3	3	21.8	22.753	C2_05610C_A	RPS8A	Small 40S ribosomal subunit protein; induced by ciclopirox olamine; repressed upon phagocytosis by murine macrophage; 5'-UTR intron; Hap43-induced; Spider biofilm repressed
	0.224538	0.118001	Q59TE0	Rpl17b	3	3	3	16.2	20.963	C2_04600C_A	RPL17B	Ribosomal protein L17; mutation confers hypersensitivity to 5-FU, tubercidin; repressed upon phagocytosis by macrophage; Hap43-induced; Spider biofilm repressed
	2.07502	-1.26156	Q59WG3	Cdc48	13	13	13	21.5	90.99	C1_10790W_A	CDC48	Putative microsomal ATPase; plasma membrane-localized; regulated by Gcn2 and Gcn4; induced by amino acid starvation (3-AT); macrophage/pseudohyphal-repressed; protein levels decrease in stationary phase yeast; Spider biofilm repressed
	0.254883	0.151326	Q5A0M4	Eft2	8	8	8	9.9	93.353	C2_03100W_A	EFT2	Elongation Factor 2 (eEF2); GTPase; essential; highly expressed; target of sordarin antifungals; antigenic in human/mouse; lacks site for regulatory phosphorylation by eEF2 kinase; GCN-regulated; higher protein amount in stationary phase
	0.419898	0.271794	Q5A0V9	Nop1	2	2	2	7.9	33.167	C4_06720W_A	NOP1	Nucleolar protein; flucytosine induced; Hap43-induced; Spider biofilm repressed
	0.585344	1.56947	Q5A1E8	Sdh12	2	2	2	3.6	70.175	C4_06610C_A	SDH12	Succinate dehydrogenase; soluble protein in hyphae; macrophage-downregulated protein level; downregulated by Efg1p; repressed by nitric oxide; protein present in exponential and stationary growth phase yeast cultures; Hap43p-repressed gene
	0.0324984	-0.0313975	Q5A397	Ssb1	12	12	12	24.5	66.448	CR_08090W_A	SSB1	HSP70 family heat shock protein; mRNA in yeast and germ tubes; at yeast cell surface, not hyphae; antigenic in human/mouse infection; macrophage, GCN-induced; possibly essential; sumoylation target; Hap43-induced; Spider biofilm repressed
	0.89009	2.56677	Q5A4E2;Q59PR3	Ded1	3	3	3	4.5	72.838	C3_06100C_A	DED1	Predicted ATP-dependent RNA helicase; RNA strand annealing activity; Spider biofilm induced
	0.479128	-2.4857	Q5A4P2	Coq3	1	1	1	8.3	37.561	C6_01840C_A	COQ3	Protein with a predicted role in coenzyme Q biosynthesis; transcriptionally induced by interaction with macrophages; possibly an essential gene, disruptants not obtained by UAU1 method
	1.94806	2.13178	Q5A4Q1	Adk1	2	2	2	7.2	27.58	C6_01910W_A	ADK1	Putative adenylate kinase; repressed in hyphae; macrophage-induced protein; adenylate kinase release used as marker for cell lysis; possibly essential (UAU1 method); flow model biofilm induced; rat catheter and Spider biofilm repressed
	1.46703	1.46207	Q5A516	Pet9	9	9	9	25.9	32.755	C5_00590W_A	PET9	Mitochondrial ADP/ATP carrier protein involved in ATP biosynthesis; possible lipid raft component; 3 predicted transmembrane helices; flucytosine induced; ketoconazole-induced; downregulated by Efg1p
	0.174449	0.863938	Q5A5Q8;A0A1D8PCI6	Rps4a	4	4	4	13.4	29.364	C2_10620W_A	RPS4A	Predicted ribosomal protein, component of the small ribosomal subunit; repressed upon phagocytosis by murine macrophage; positively regulated by Tbf1; mutant is defective in filamentous growth and sensitive to osmotic stress
	0.0482059	0.251404	Q5A5V6	Pdb1	2	2	2	5	41.294	C4_04150C_A	PDB1	Putative pyruvate dehydrogenase; fluconazole-induced; protein level decreases in stationary phase cultures; Spider biofilm repressed
	0.227048	0.175163	Q5A6A1	Rpl24a	6	6	6	31.6	17.383	C4_04890C_A	RPL24A	Predicted ribosomal protein; downregulated upon phagocytosis by murine macrophage; intron in 5'-UTR; Hap43-induced; Spider biofilm repressed
	0.848408	0.869099	Q5A6R1	Rpl15a	3	3	3	15.2	24.329	CR_04100C_A	RPL15A	Putative ribosomal protein; repressed upon phagocytosis by murine macrophage; positively regulated by Tbf1; Spider biofilm repressed
	0.353969	0.469922	Q5A7K0	Rps24	4	4	4	33.3	15.513	C3_00090W_A	RPS24	Predicted ribosomal protein; hyphal downregulated; repressed upon phagocytosis by murine macrophage; transcriptionally activated by Tbf1; Spider biofilm repressed
	0.169734	-0.603281	Q5ABC3	Tuf1	4	4	4	12.9	46.705	C1_00590W_A	TUF1	Translation elongation factor TU; macrophage/pseudohyphal-induced; repressed upon phagocytosis by murine macrophage; levels decrease in stationary phase cells; Spider biofilm repressed
	1.66271	-0.641499	Q5ADM7	Tdh3	9	9	9	29.6	35.832	C3_06870W_A	TDH3	NAD-linked glyceraldehyde-3-phosphate dehydrogenase; binds fibronectin, laminin; at cell surface; antigenic in infection; farnesol-repressed; stationary phase-enriched; GlcNAc-induced; flow model biofilm induced; Spider biofilm repressed
	0.527213	1.44821	Q5ADQ6	Rps12	2	2	2	15.4	15.698	C3_07150C_A	RPS12	Acidic ribosomal protein S12; regulated by Gcn4, activated by Tbf1; repressed by amino acid starvation (3-AT); protein abundance is affected by URA3 expression in CAI-4 strain background; sumoylation target; Spider biofilm repressed
	0.185385	-0.616022	Q5AHY8	Mrpl27	2	2	2	13.7	19.307	C1_03650C_A	MRPL27	Putative 60S ribosomal protein L27, mitochondrial precursor
	1.12489	3.20799	Q5AJ93	Rps7a	3	3	3	15.1	21.246	C3_01490W_A	RPS7A	Ribosomal protein S7; genes encoding cytoplasmic ribosomal subunits, translation factors, and tRNA synthetases are downregulated upon phagocytosis by murine macrophage; Spider biofilm repressed
	0.507334	0.294948	Q5ANA1;A0A1D8PF11	Rpl8b	5	5	5	24.8	28.498	C3_05240C_A	RPL8B	Predicted ribosomal protein; regulated upon yeast-hypha switch; repressed upon phagocytosis by murine macrophage; Spider biofilm repressed
	0.0621374	0.373365	Q5AP79	Mir1	2	2	2	8.8	32.52	C1_10160W_A	MIR1	Putative mitochondrial phosphate transporter; caspofungin repressed; expression is increased in a fluconazole-resistant isolate; induced upon adherence to polystyrene
	1.23479	-0.931648	Q9P840	Yae1	5	5	5	31.1	20.24	C7_00800C_A	YAE1	Ortholog(s) have protein binding, bridging activity, role in protein maturation by [4Fe-4S] cluster transfer and Yae1-Lto1 complex localization
	0.50598	-0.613197	Q9Y7F0;P0CU34	Tsa1	2	2	2	11.7	21.86	C3_06180C_A	TSA1	TSA/alkyl hydroperoxide peroxidase C (AhPC) family protein; similar to thiol-dependent peroxidases of oxidative stress signaling; antigenic; hyphal surface, nucleus; yeast-form nucleus, cytoplasm; biofilm, phagocytosis, peroxide induced

## Sheet: S2 Fig-Sth1-Myc in rsc4rsc4 
Significant	-Log(P-value)	Log2 Fold change	Protein ID (Uniprot)	Standard protein name	Peptides	Razor + unique peptides	Unique peptides	Sequence coverage [%]	Mol. weight [kDa]	Systematic gene name	Standard name	Description
+	3.05466	9.91836	A0A1D8PJG4;A0A1D8PGK4	Sth1; Snf2	33	33	33	28.6	149.8	C3_02490C_A	C3_02490C_A	Putative ATP-dependent helicase; induced by nitric oxide
+	3.4998	9.08178	A0A1D8PCV8	Rsc1	17	17	17	27.4	89.914	C1_02750C_A	C1_02750C_A	Ortholog(s) have DNA translocase activity
+	2.48794	8.91811	A0A1D8PFW3	Rsc8	18	18	18	37.3	64.302	C1_14240W_A	C1_14240W_A	Putative RSC chromatin remodeling complex component; possibly an essential gene, disruptants not obtained by UAU1 method
+	3.83067	8.44615	A0A1D8PG45	Rsc58	11	11	11	27.1	63.967	C2_00570W_A	C2_00570W_A	Ortholog(s) have DNA translocase activity, role in chromatin remodeling, nucleosome disassembly, transcription elongation from RNA polymerase II promoter and RSC-type complex localization
+	2.32857	7.71836	Q5AA11	Rsc9	7	7	7	13.2	71.866	C1_05780W_A	C1_05780W_A	Putative RSC chromatin remodeling complex component; decreased transcription is observed upon fluphenazine treatment or in an azole-resistant strain that overexpresses CDR1 and CDR2
+	3.45941	7.14345	A0A1D8PHT4	Snf12	16	16	16	35.6	53.598	C2_07100W_A	C2_07100W_A	Ortholog(s) have DNA translocase activity and role in positive regulation of transcription by RNA polymerase II, positive regulation of transcription from RNA polymerase II promoter in response to amino acid starvation
+	2.55461	6.82815	Q5A9X7	Arp9	6	6	6	14	54.639	C3_01030W_A	ARP9	Protein similar to S. cerevisiae Arp3p, a component of the Arp2/3 complex involved in actin-dependent processes; likely to be essential for growth, based on an insertional mutagenesis strategy
+	1.93899	6.76168	Q5ALY5	C2_01370cp	5	5	5	8.3	72.347	C2_01370C_A	C2_01370C_A	Ortholog of C. dubliniensis CD36 : Cd36_16230, C. parapsilosis CDC317 : CPAR2_213950, C. auris B8441 : B9J08_003853 and Candida tenuis NRRL Y-1498 : CANTEDRAFT_112720
+	3.21823	6.30028	A0A1D8PG62	Rsc7	12	12	12	19.6	51.911	C2_00710W_A	NPL6	Putative nuclear protein localization factor; Hap43-induced; Spider biofilm repressed
+	3.24623	6.03199	A0A1D8PCZ5	Arp7	4	4	4	11.1	43.043	C1_03310W_A	C1_03310W_A	Putative DNA translocase; Spider biofilm repressed
+	2.52018	5.33904	A0A1D8PQQ5	Rps18	4	4	4	29.7	16.99	C7_00960W_A	RPS18	Predicted ribosomal protein; repressed upon phagocytosis by murine macrophage; repressed by nitric oxide; Hap43-induced; Spider biofilm repressed
+	1.10836	4.87246	A0A1D8PTR4	Rps29a	3	3	3	46.4	6.6005	CR_08480C_A	CR_08480C_A	Ortholog(s) have structural constituent of ribosome activity and cytosolic small ribosomal subunit localization
+	2.88447	4.54771	A0A1D8PF45	Rpl37b	2	2	2	17.8	10.076	C1_11360W_A	RPL37B	Ribosomal protein L37; Hap43-induced; Spider biofilm repressed
+	2.22544	4.35062	Q59T87	C1_01800wp	3	3	3	15.1	26.891	C1_01800W_A	C1_01800W_A	Ortholog of C. dubliniensis CD36 : Cd36_01640, C. parapsilosis CDC317 : CPAR2_106830, C. auris B8441 : B9J08_004660 and Candida tenuis NRRL Y-1498 : cten_CGOB_00039
+	2.95787	4.23724	A0A1D8PPE0	Rps13	2	2	2	11.9	16.946	C6_00650C_A	RPS13	Putative ribosomal protein of the small subunit
+	2.95064	3.78562	A0A1D8PDU3	Rps23a	2	2	2	12.4	15.965	C1_06580W_A	RPS23A	Putative ribosomal protein; repressed upon phagocytosis by murine macrophage; Spider biofilm repressed
+	1.4918	3.67219	Q5A1E8	Sdh12	2	2	2	3.6	70.175	C4_06610C_A	SDH12	Succinate dehydrogenase; soluble protein in hyphae; macrophage-downregulated protein level; downregulated by Efg1p; repressed by nitric oxide; protein present in exponential and stationary growth phase yeast cultures; Hap43p-repressed gene
+	2.09995	3.04487	P87206	Tif1	14	14	14	34	44.599	C1_01350C_A	TIF	Translation initiation factor; upregulated in highly virulent strain compared to less virulent strain; antigenic in human; flucytosine induced; downregulated upon phagocytosis by macrophages; Spider biofilm repressed
	0.785144	2.66468	A0A1D8PEB6	Sfh1	2	2	2	10.8	40.604	C1_08160W_A	C1_08160W_A	Ortholog(s) have DNA translocase activity
	0.58205	2.72646	A0A1D8PC97	Tub2	2	2	2	7.3	49.997	C1_00710C_A	TUB2	Beta-tubulin; functional homolog of ScTub2; overproduction makes S. cerevisiae inviable; has two introns; GlcNAc, hypha fluconazole-induced; slow growth, ectopic expression increases white-to opaque switch; rat catheter biofilm repressed
	0.0955679	-0.697044	A0A1D8PCJ1	Mrp20	2	2	2	7.5	34.387	C1_01600W_A	MRP20	Component of mitochondrial ribosome; decreased expression in hyphae compared to yeast-form cells
	0.168177	0.134042	A0A1D8PCQ5	Rpl26b	6	6	6	39.4	14.185	C1_02330C_A	C1_02330C_A	Ribosomal 60S subunit protein; Spider biofilm repressed
	0.196928	-0.988149	A0A1D8PCT0;A0A1D8PDL5;A0A1D8PRT5	Gsc1	4	4	4	2.1	218.1	C1_02420C_A	GSC1	Essential beta-1,3-glucan synthase subunit; gsc1 allele determines resistance/sensitivity to echinocandins; 16 predicted membrane-spanning regions; mRNA abundance declines after yeast-to-hypha transition; Spider biofilm induced
	1.5513	1.44407	A0A1D8PCW6	Rps16a	4	4	4	27.5	15.739	C1_03030W_A	RPS16A	Putative 40S ribosomal subunit; macrophage/pseudohyphal-induced after 16 h; Spider biofilm repressed
	0.702644	0.129983	A0A1D8PDC4	Atp1	6	6	6	13	58.984	C1_04610W_A	ATP1	ATP synthase alpha subunit; antigenic in human/mouse; at hyphal surface; ciclopirox, ketoconazole, flucytosine induced; Efg1, caspofungin repressed; may be essential; sumoylation target; stationary phase-enriched; Spider biofilm repressed
	0.815398	3.84748	A0A1D8PDL6	Rpl7a	2	2	2	8.3	27.399	C1_05720W_A	C1_05720W_A	60S ribosomal protein L7; snoRNA snR39b encoded within the 2nd intron
	0.357341	2.81039	A0A1D8PDZ1	Rpl34b	2	2	2	20.5	13.739	C1_06890C_A	C1_06890C_A	Ribosomal 60S subunit protein; Spider biofilm repressed
	0.622095	2.55613	A0A1D8PEM5	Idh1	4	4	4	10.4	39.173	C1_09630W_A	IDH1	Putative mitochondrial NAD-isocitrate dehydrogenase subunit 1; soluble protein in hyphae; protein level decrease in stationary phase cultures
	1.83201	1.47895	A0A1D8PF08	Rpl2	3	3	3	15.7	27.311	C1_11060C_A	RPL2	Putative 60S ribosomal protein L2; Hap43-induced gene; repressed in infected rabbit kidney in SC5314, but not NGY152, strain background; Spider biofilm repressed
	1.18039	1.095	A0A1D8PFG4	Rpl27a	4	4	4	35.3	15.514	C1_12390C_A	RPL27A	Ribosomal protein L27; Spider biofilm repressed
	0.74071	0.564229	A0A1D8PFL9	Rpl14	3	3	3	22.1	14.721	C1_13050W_A	RPL14	Ribosomal protein L14; promoter bound directly by Tbf1p; Hap43p-induced gene
	0.482214	-0.371207	A0A1D8PFR4	Act1	7	7	7	23.1	41.738	C1_13700W_A	ACT1	Actin; gene has intron; transcript regulated by growth phase, starvation; at polarized growth site in budding and hyphal cells; required for wild-type Cdc42 localization; unprocessed N terminus; Hap43-induced; Spider biofilm repressed
	1.48663	0.994537	A0A1D8PFV1	Rpl4b	7	7	7	34.2	39.212	C1_14110C_A	RPL4B	Ribosomal protein 4B; repressed upon phagocytosis by murine macrophage; Spider biofilm repressed
	0.511274	2.1345	A0A1D8PG16	Rpl38	2	2	2	24.4	8.8924	C2_00210W_A	RPL38	60S ribosomal ribosomal protein subunit; genes encoding cytoplasmic ribosomal subunits, translation factors, tRNA synthetases are downregulated upon phagocytosis by murine macrophage
	1.26312	2.11859	A0A1D8PG88	Rsc4	12	12	12	20.3	71.992	C2_00830C_A	C2_00830C_A	Ortholog(s) have DNA translocase activity, lysine-acetylated histone binding activity and role in ATP-dependent chromatin remodeling, nucleosome disassembly, transcription elongation from RNA polymerase II promoter
	0.885643	1.14118	A0A1D8PGY8	Rps9b	3	3	3	12.7	21.72	C2_03820C_A	RPS9B	Predicted ribosomal protein; repressed upon phagocytosis by murine macrophage; transcript possibly regulated upon hyphal formation; Spider biofilm repressed
	1.02496	0.808588	A0A1D8PH21	Rpl39	2	2	2	23.2	11.067	C2_03960W_A	RPL39	Ribosomal protein L39; transcript induced upon germ tube formation; colony morphology-related gene regulation by Ssn6; Hap43-induced
	0.387611	2.22031	A0A1D8PHF5	Rpl31b	2	2	2	19.6	12.967	C2_05410W_A	C2_05410W_A	Ribosomal 60S subunit protein L31B; Spider biofilm repressed
	0.00667614	-0.0381455	A0A1D8PHF8	Wh11	2	2	2	32.3	6.9956	C2_05180W_A	WH11	White-phase yeast transcript; expression in opaques increases virulence/switching; mutant switches as WT; Hap43, hypoxia, ketoconazol induced; required for RPMI biofilm; Bcr1-induced in RPMI a/a biofilm; rat catheter, Spider biofilm induced
	3.48296	0.888306	A0A1D8PJ01	Pma1	3	3	3	3.9	97.537	C3_00720W_A	PMA1	Plasma membrane H(+)-ATPase; highly expressed, comprises 20-40% of total plasma membrane protein; levels increase at stationary phase transition; fluconazole induced; caspofungin repressed; upregulated in RHE model; Spider biofilm repressed
	0.837951	0.813796	A0A1D8PK30	Rpl35	2	2	2	17.5	14.086	C3_04960W_A	RPL35	Ribosomal protein; downregulation correlates with clinical development of fluconazole resistance; colony morphology-related gene regulation by Ssn6; Hap43-induced; Spider biofilm repressed
	1.83474	1.44316	A0A1D8PK40	Rpl19a	6	6	6	25.3	21.884	C3_04500C_A	RPL19A	Ribosomal protein L19; repressed upon phagocytosis by murine macrophages; Hap43-induced gene; Spider biofilm repressed
	1.23709	1.02019	A0A1D8PK43	Rpl18	3	3	3	18.8	20.77	C3_05100C_A	RPL18	Predicted ribosomal protein; Plc1p-regulated, Tbf1-activated; repressed upon phagocytosis by murine macrophage; Hap43p-induced; Spider biofilm repressed
	0.167499	-0.326967	A0A1D8PKE0	Utr1	6	6	6	11.1	65.703	C3_06110C_A	C3_06110C_A	Predicted NAD+/NADH kinase; possible role in cellular iron ion homeostasis; Spider biofilm induced
	0.311992	-0.180804	A0A1D8PKZ9	Atp2	3	3	3	6.9	53.942	C4_00270W_A	ATP2	F1 beta subunit of F1F0 ATPase complex; antigenic in human, mice; induced by ciclopirox olamine; caspofungin repressed; macrophage/pseudohyphal-induced; detected during exponential and stationary growth phases; Spider biofilm repressed
	0.204428	0.927652	A0A1D8PL78	Crd2	2	2	2	36.8	7.7467	C4_01160W_A	CRD2	Metallothionein; for adaptation to growth in high copper; basal transcription is cadmium-repressed; Ssn6 regulated; complements copper sensitivity of an S. cerevisiae cup1 mutant; regulated by Sef1, Sfu1, and Hap43; Spider biofilm induced
	0.5672	3.66508	A0A1D8PL99	Rps6a	6	6	6	29.2	27.086	C4_01270W_A	RPS6A	Ribosomal protein 6A; localizes to cell surface of yeast cells but not hyphae; repressed upon phagocytosis by murine macrophage; possibly essential; Hap43-induced; Spider biofilm repressed
	0.776665	3.57137	A0A1D8PLC9	Rpl20b	2	2	2	14	20.338	C4_01520C_A	RPL20B	Ribosomal protein L20; repressed upon phagocytosis by murine macrophage; alternatively spliced intron in 5' UTR; Hap43-induced; Spider biofilm repressed
	0.0417981	0.291095	A0A1D8PM97	Rad59	1	1	1	4.2	24.972	C4_05270C_A	RAD59	Protein involved in homologous recombination and DNA breaks repair; similar to S. cerevisiae Rad59p; N-terminal similarity with Rad52p
	1.54019	1.57975	A0A1D8PN83	Rps11a	5	5	5	36.1	17.6	C5_01540W_A	C5_01540W_A	Protein component of the small (40S) ribosomal subunit; Spider biofilm repressed
	1.35874	2.9369	A0A1D8PP43	Adh1	3	3	3	11.1	36.909	C5_05050W_A	ADH1	Alcohol dehydrogenase; oxidizes ethanol to acetaldehyde; at yeast cell surface; immunogenic in humans/mice; complements S. cerevisiae adh1 adh2 adh3 mutant; fluconazole, farnesol-induced; flow model biofilm induced; Spider biofilm repressed
	1.52135	0.84978	A0A1D8PPN6	Rpl32	4	4	4	35.1	14.956	C6_01700W_A	RPL32	Component of the large (60S) ribosomal subunit; Spider biofilm repressed
	1.18195	0.934047	A0A1D8PQS0	Rpp0	5	5	5	19.6	33.272	C7_00990W_A	RPP0	Putative ribosomal protein; antigenic in mouse; repressed upon phagocytosis by murine macrophage; induced by Tbf1; overlaps orf19.7014; Spider biofilm repressed
	0.621676	1.52386	A0A1D8PRJ6	Sui3	2	2	2	6.8	31.079	C7_04130C_A	SUI3	Putative translation initiation factor; genes encoding ribosomal subunits, translation factors, and tRNA synthetases are downregulated upon phagocytosis by murine macrophage
	0.991083	0.694839	A0A1D8PTD1	Ura2	6	6	6	3.2	244.64	CR_07050C_A	URA2	Putative bifunctional carbamoylphosphate synthetase-aspartate transcarbamylase; flucytosine induced; macrophage/pseudohyphal-induced; 5'-UTR intron; flow model biofilm repressed
	1.23324	-2.16598	A0A1D8PTD6	Cr_06980wp	2	2	2	12.8	17.272	CR_06980W_A	CR_06980W_A	Putative protein of unknown function; Hap43-induced; repressed by Rim101; Spider biofilm induced
	0.348351	0.344831	A0A1D8PTV4	Tub1	4	4	4	10.9	49.968	CR_09120C_A	TUB1	Alpha-tubulin; gene has intron; complements cold-sensitivity of S. cerevisiae tub1 mutant; C. albicans has single alpha-tubulin gene, whereas S. cerevisiae has two (TUB1, TUB3); farnesol-upregulated in biofilm; sumoylation target
	0.400162	1.68773	A0A1D8PU46	Sik1	2	2	2	4.3	57.769	CR_09950C_A	SIK1	Putative U3 snoRNP protein; Hap43p-induced gene; physically interacts with TAP-tagged Nop1p
	0.514938	2.74697	O42817	Rps0	2	2	2	9.6	28.73	C3_05370C_A	YST1	Ribosome-associated protein; antigenic in mice; complements S. cerevisiae yst1 yst2 mutant; similar to laminin receptor; predicted S/T phosphorylation, N-glycosylation, myristoylation, Hap43-, Gcn4-regulated; Spider biofilm repressed
	0.684467	2.35492	O43101	Cbf5	3	3	3	5.4	54.321	C1_10620W_A	C1_10620W_A	Ortholog(s) have pseudouridine synthase activity
	1.57185	1.08131	O59931	Rpl13	6	6	6	31.2	23.053	C1_03020C_A	RPL13	Putative ribosomal subunit; antigenic during murine infection; downregulated upon phagocytosis by murine macrophage; Spider biofilm repressed
	1.34589	1.85299	O93827	Mpg1	7	7	7	21.8	39.975	C3_07950C_A	SRB1	Essential GDP-mannose pyrophosphorylase; makes GDP-mannose for protein glycosylation; functional in S. cerevisiae psa1; on yeast-form, not hyphal cell surface; alkaline induced; induced on adherence to polystyrene; Spider biofilm repressed
	0.784402	4.56681	P25997	Cef3	4	4	4	3.2	116.92	C5_01580C_A	CEF3	Translation elongation factor 3; antigenic in humans; predicted C-term nucleotide-binding active site; protein on surface of yeast, not hyphae; polystyrene adherence induced; higher protein amount in stationary phase; possibly essential
	0.48832	-0.228719	P41797;A0A1D8PG96	Ssa1	7	7	1	11.9	70.323	C1_13480W_A	HSP70	Putative hsp70 chaperone; role in entry into host cells; heat-shock, amphotericin B, cadmium, ketoconazole-induced; surface localized in yeast and hyphae; antigenic in host; farnesol-downregulated in biofilm; Spider biofilm induced
	2.49054	2.38046	P46598	Hsp90	9	9	9	13.6	80.822	C7_02030W_A	HSP90	Essential chaperone, regulates several signal transduction pathways and temperature-induced morphogenesis; activated by heat shock, stress; localizes to surface of hyphae, not yeast cells; mediates echinocandin and biofilm azole resistance
	0.737247	3.33214	P83774	Asc1	3	3	3	11.7	34.555	C7_01250W_A	ASC1	40S ribosomal subunit similar to G-beta subunits; glucose or N starvation induced filamentation; required for virulence in mice; snoRNA snR24 encoded in ASC1 intron; repressed in stationary phase; GlcNAc-induced; Spider biofilm repressed
	0.286124	1.03134	Q59KV8	Lsp1	3	3	3	8.8	35.59	C2_06730W_A	LSP1	Eisosome component with a predicted role in endocytosis; protein present in exponential and stationary growth phase yeast cultures; caspofungin repressed; biofilm induced; fungal-specific (no human/murine homolog); sumoylation target
	1.1744	0.908492	Q59LS1	Rpl3	3	3	3	8	43.948	C2_09430W_A	RPL3	Ribosomal protein, large subunit; induced by ciclopirox olamine treatment; genes encoding cytoplasmic ribosomal subunits are downregulated upon phagocytosis by murine macrophages; Hap43-induced gene; Spider biofilm repressed
	0.670335	2.62803	Q59P43	Gsp1	2	2	2	9.8	24.314	C2_06310C_A	GSP1	Small RAN G-protein; essential; no prenylation predicted; can rescue S. cerevisiae gsp1 viability; macrophage/pseudohyphal-induced; transcript not regulated by white-opaque, yeast-hypha switching; GlcNAc-induced; Spider biofilm repressed
	1.24727	1.42013	Q59QD6;P0CY35	Tef2	15	15	15	40.8	50.011	C1_08380W_A	TEF2	Translation elongation factor 1-alpha; genes encoding ribosomal subunits, translation factors, and tRNA synthetases are downregulated upon phagocytosis by murine macrophage
	0.213654	-1.32493	Q59RP7	Mrpl4	2	2	2	5.5	36.363	CR_07320C_A	CR_07320C_A	Ortholog of S. cerevisiae Mrpl4, a mitochondrial ribosomal protein of the large subunit; repressed by nitric oxide
	1.89513	1.23598	Q59T44	Rps8a	3	3	3	21.8	22.753	C2_05610C_A	RPS8A	Small 40S ribosomal subunit protein; induced by ciclopirox olamine; repressed upon phagocytosis by murine macrophage; 5'-UTR intron; Hap43-induced; Spider biofilm repressed
	1.355	0.974885	Q59TE0	Rpl17b	3	3	3	16.2	20.963	C2_04600C_A	RPL17B	Ribosomal protein L17; mutation confers hypersensitivity to 5-FU, tubercidin; repressed upon phagocytosis by macrophage; Hap43-induced; Spider biofilm repressed
	1.1453	-0.863841	Q59WG3	Cdc48	13	13	13	21.5	90.99	C1_10790W_A	CDC48	Putative microsomal ATPase; plasma membrane-localized; regulated by Gcn2 and Gcn4; induced by amino acid starvation (3-AT); macrophage/pseudohyphal-repressed; protein levels decrease in stationary phase yeast; Spider biofilm repressed
	0.816298	0.772278	Q5A0M4	Eft2	8	8	8	9.9	93.353	C2_03100W_A	EFT2	Elongation Factor 2 (eEF2); GTPase; essential; highly expressed; target of sordarin antifungals; antigenic in human/mouse; lacks site for regulatory phosphorylation by eEF2 kinase; GCN-regulated; higher protein amount in stationary phase
	0.980899	1.23397	Q5A0V9	Nop1	2	2	2	7.9	33.167	C4_06720W_A	NOP1	Nucleolar protein; flucytosine induced; Hap43-induced; Spider biofilm repressed
	1.27719	0.949392	Q5A397	Ssb1	12	12	12	24.5	66.448	CR_08090W_A	SSB1	HSP70 family heat shock protein; mRNA in yeast and germ tubes; at yeast cell surface, not hyphae; antigenic in human/mouse infection; macrophage, GCN-induced; possibly essential; sumoylation target; Hap43-induced; Spider biofilm repressed
	0.723268	2.75852	Q5A4E2;Q59PR3	Ded1	3	3	3	4.5	72.838	C3_06100C_A	DED1	Predicted ATP-dependent RNA helicase; RNA strand annealing activity; Spider biofilm induced
	0.781912	-0.854383	Q5A4P2	Coq3	1	1	1	8.3	37.561	C6_01840C_A	COQ3	Protein with a predicted role in coenzyme Q biosynthesis; transcriptionally induced by interaction with macrophages; possibly an essential gene, disruptants not obtained by UAU1 method
	1.38101	2.00864	Q5A4Q1	Adk1	2	2	2	7.2	27.58	C6_01910W_A	ADK1	Putative adenylate kinase; repressed in hyphae; macrophage-induced protein; adenylate kinase release used as marker for cell lysis; possibly essential (UAU1 method); flow model biofilm induced; rat catheter and Spider biofilm repressed
	1.37333	1.7957	Q5A516	Pet9	9	9	9	25.9	32.755	C5_00590W_A	PET9	Mitochondrial ADP/ATP carrier protein involved in ATP biosynthesis; possible lipid raft component; 3 predicted transmembrane helices; flucytosine induced; ketoconazole-induced; downregulated by Efg1p
	0.88636	3.10827	Q5A5Q8;A0A1D8PCI6	Rps4a	4	4	4	13.4	29.364	C2_10620W_A	RPS4A	Predicted ribosomal protein, component of the small ribosomal subunit; repressed upon phagocytosis by murine macrophage; positively regulated by Tbf1; mutant is defective in filamentous growth and sensitive to osmotic stress
	0.370427	1.93032	Q5A5V6	Pdb1	2	2	2	5	41.294	C4_04150C_A	PDB1	Putative pyruvate dehydrogenase; fluconazole-induced; protein level decreases in stationary phase cultures; Spider biofilm repressed
	0.957852	0.778242	Q5A6A1	Rpl24a	6	6	6	31.6	17.383	C4_04890C_A	RPL24A	Predicted ribosomal protein; downregulated upon phagocytosis by murine macrophage; intron in 5'-UTR; Hap43-induced; Spider biofilm repressed
	1.37969	1.70218	Q5A6R1	Rpl15a	3	3	3	15.2	24.329	CR_04100C_A	RPL15A	Putative ribosomal protein; repressed upon phagocytosis by murine macrophage; positively regulated by Tbf1; Spider biofilm repressed
	1.2531	1.49421	Q5A7K0	Rps24	4	4	4	33.3	15.513	C3_00090W_A	RPS24	Predicted ribosomal protein; hyphal downregulated; repressed upon phagocytosis by murine macrophage; transcriptionally activated by Tbf1; Spider biofilm repressed
	1.18127	0.917807	Q5ABC3	Tuf1	4	4	4	12.9	46.705	C1_00590W_A	TUF1	Translation elongation factor TU; macrophage/pseudohyphal-induced; repressed upon phagocytosis by murine macrophage; levels decrease in stationary phase cells; Spider biofilm repressed
	0.593519	0.318569	Q5ADM7	Tdh3	9	9	9	29.6	35.832	C3_06870W_A	TDH3	NAD-linked glyceraldehyde-3-phosphate dehydrogenase; binds fibronectin, laminin; at cell surface; antigenic in infection; farnesol-repressed; stationary phase-enriched; GlcNAc-induced; flow model biofilm induced; Spider biofilm repressed
	0.481942	1.80581	Q5ADQ6	Rps12	2	2	2	15.4	15.698	C3_07150C_A	RPS12	Acidic ribosomal protein S12; regulated by Gcn4, activated by Tbf1; repressed by amino acid starvation (3-AT); protein abundance is affected by URA3 expression in CAI-4 strain background; sumoylation target; Spider biofilm repressed
	0.0256584	0.123351	Q5AHY8	Mrpl27	2	2	2	13.7	19.307	C1_03650C_A	MRPL27	Putative 60S ribosomal protein L27, mitochondrial precursor
	0.982138	3.74818	Q5AJ93	Rps7a	3	3	3	15.1	21.246	C3_01490W_A	RPS7A	Ribosomal protein S7; genes encoding cytoplasmic ribosomal subunits, translation factors, and tRNA synthetases are downregulated upon phagocytosis by murine macrophage; Spider biofilm repressed
	1.46177	1.15076	Q5ANA1;A0A1D8PF11	Rpl8b	5	5	5	24.8	28.498	C3_05240C_A	RPL8B	Predicted ribosomal protein; regulated upon yeast-hypha switch; repressed upon phagocytosis by murine macrophage; Spider biofilm repressed
	0.797997	3.37478	Q5AP79	Mir1	2	2	2	8.8	32.52	C1_10160W_A	MIR1	Putative mitochondrial phosphate transporter; caspofungin repressed; expression is increased in a fluconazole-resistant isolate; induced upon adherence to polystyrene
	1.36667	-0.898568	Q9P840	Yae1	5	5	5	31.1	20.24	C7_00800C_A	YAE1	Ortholog(s) have protein binding, bridging activity, role in protein maturation by [4Fe-4S] cluster transfer and Yae1-Lto1 complex localization
	0.376091	-0.120112	Q9Y7F0;P0CU34	Tsa1	2	2	2	11.7	21.86	C3_06180C_A	TSA1	TSA/alkyl hydroperoxide peroxidase C (AhPC) family protein; similar to thiol-dependent peroxidases of oxidative stress signaling; antigenic; hyphal surface, nucleus; yeast-form nucleus, cytoplasm; biofilm, phagocytosis, peroxide induced

## Sheet: AP-MS Raw data-LFQ intensities
Protein ID (Uniprot)	Standard protein name	Immunoprecipitation Replicate 1			Immunoprecipitation Replicate 2			Immunoprecipitation Replicate 3			No antibody control Replicate 1			No antibody control Replicate 2			No antibody control Replicate 3
		No tag	Sth1-Myc	Sth1-Myc in rsc4/rsc4	No tag	Sth1-Myc	Sth1-Myc in rsc4/rsc4	No tag	Sth1-Myc	Sth1-Myc in rsc4/rsc4	No tag	Sth1-Myc	Sth1-Myc in rsc4/rsc4	No tag	Sth1-Myc	Sth1-Myc in rsc4/rsc4	No tag	Sth1-Myc	Sth1-Myc in rsc4/rsc4
A0A1D8PJG4;A0A1D8PGK4	Sth1; Snf2	NaN	24.375	24.904	NaN	25.4913	25.1856	NaN	23.9065	24.6123	NaN	NaN	NaN	NaN	NaN	NaN	NaN	NaN	NaN
A0A1D8PCV8	Rsc1	NaN	22.6638	23.1018	NaN	24.1249	23.7944	NaN	22.4493	22.5345	NaN	NaN	NaN	NaN	NaN	NaN	NaN	NaN	NaN
A0A1D8PFW3	Rsc8	NaN	23.4759	24.1019	NaN	24.9332	24.7532	NaN	23.1266	23.7218	NaN	NaN	NaN	NaN	NaN	NaN	NaN	NaN	NaN
A0A1D8PG45	Rsc58	NaN	21.7593	22.8174	NaN	23.3675	23.2254	NaN	21.4909	22.5414	NaN	NaN	NaN	NaN	NaN	NaN	NaN	NaN	NaN
A0A1D8PG88	Rsc4	NaN	22.3648	NaN	NaN	23.5798	NaN	NaN	21.848	NaN	NaN	NaN	NaN	NaN	NaN	NaN	NaN	NaN	NaN
Q5AA11	Rsc9	NaN	21.4887	22.2128	NaN	22.712	22.4581	NaN	20.8346	21.7927	NaN	NaN	NaN	NaN	NaN	NaN	NaN	NaN	NaN
A0A1D8PHT4	Snf12	NaN	22.3098	23.1067	NaN	23.7489	23.5302	NaN	22.3228	22.512	NaN	NaN	NaN	NaN	NaN	NaN	NaN	NaN	NaN
Q5ALY5	C2_01370cp	NaN	20.0042	20.7312	NaN	21.6312	21.1186	NaN	19.5604	19.6432	NaN	NaN	NaN	NaN	NaN	NaN	NaN	NaN	NaN
Q5A9X7	Arp9	NaN	20.6596	21.4252	NaN	21.8977	21.7699	NaN	20.3065	20.9311	NaN	NaN	NaN	NaN	NaN	NaN	NaN	NaN	NaN
A0A1D8PG62	Rsc7	NaN	21.3723	22.0564	NaN	22.8528	22.5326	NaN	20.7806	21.2827	NaN	NaN	NaN	NaN	NaN	NaN	NaN	NaN	NaN
A0A1D8PCZ5	Arp7	NaN	20.5536	21.3013	NaN	22.2666	21.8367	NaN	20.1777	20.5026	NaN	NaN	NaN	NaN	NaN	NaN	NaN	NaN	NaN
A0A1D8PQQ5	Rps18	NaN	19.6977	19.8933	NaN	19.781	19.8688	NaN	19.282	19.5645	NaN	NaN	NaN	NaN	NaN	NaN	NaN	NaN	NaN
Q59T87	C1_01800wp	NaN	18.9371	19.5053	NaN	19.7373	20.0785	NaN	18.858	19.1894	NaN	NaN	NaN	NaN	NaN	NaN	NaN	NaN	NaN
A0A1D8PEB6	Sfh1	NaN	NaN	NaN	NaN	18.2721	19.2979	NaN	17.7288	18.2122	NaN	NaN	NaN	NaN	NaN	NaN	NaN	NaN	NaN
A0A1D8PC97	Tub2	18.1707	17.9831	17.1152	NaN	18.3615	18.9256	NaN	NaN	17.7942	NaN	NaN	NaN	NaN	NaN	NaN	NaN	NaN	NaN
A0A1D8PCJ1	Mrp20	20.0033	NaN	NaN	18.6128	NaN	17.8294	NaN	NaN	NaN	NaN	NaN	NaN	NaN	NaN	NaN	NaN	NaN	NaN
A0A1D8PCQ5	Rpl26b	22.8189	22.9955	22.9833	22.606	22.8321	23.1382	23.3553	22.7153	23.1402	21.0239	20.1668	21.0263	20.8335	23.2129	20.2653	23.5703	23.0521	NaN
A0A1D8PCT0;A0A1D8PDL5;A0A1D8PRT5	Gsc1	NaN	NaN	19.2167	20.5042	NaN	NaN	20.8947	NaN	19.4188	NaN	NaN	NaN	NaN	NaN	NaN	NaN	NaN	NaN
A0A1D8PCW6	Rps16a	19.6128	19.4854	20.4441	18.6906	19.6502	20.5984	18.9282	18.8748	19.3858	NaN	NaN	NaN	NaN	18.8046	NaN	NaN	NaN	NaN
A0A1D8PDC4	Atp1	20.3609	20.786	20.4268	20.4522	20.734	20.5814	20.3092	20.296	20.3145	19.1133	NaN	NaN	NaN	18.7611	NaN	18.0848	17.9801	NaN
A0A1D8PDL6	Rpl7a	19.1852	NaN	19.8765	NaN	NaN	19.9324	NaN	NaN	NaN	NaN	NaN	NaN	NaN	NaN	NaN	NaN	NaN	NaN
A0A1D8PDU3	Rps23a	NaN	17.1561	19.1256	NaN	NaN	18.7605	NaN	NaN	18.6361	NaN	NaN	NaN	NaN	NaN	NaN	NaN	NaN	NaN
A0A1D8PDZ1	Rpl34b	21.5163	NaN	22.2959	NaN	NaN	22.2547	22.287	21.8601	22.1556	NaN	NaN	NaN	NaN	NaN	NaN	NaN	NaN	NaN
A0A1D8PEM5	Idh1	NaN	NaN	18.7171	17.8486	18.9761	20.0219	18.3543	18.4043	NaN	NaN	NaN	NaN	NaN	NaN	NaN	NaN	NaN	NaN
A0A1D8PF08	Rpl2	20.0364	21.0246	21.439	19.4215	20.2475	21.2261	20.1029	19.9087	21.2775	NaN	NaN	17.193	NaN	NaN	NaN	NaN	NaN	NaN
A0A1D8PF45	Rpl37b	NaN	20.154	20.5609	NaN	19.8748	19.7414	NaN	NaN	20.8522	NaN	NaN	NaN	NaN	NaN	NaN	NaN	NaN	NaN
A0A1D8PFG4	Rpl27a	21.2811	21.3156	21.9738	20.3597	21.5223	22.1187	21.2129	21.2674	21.8213	NaN	NaN	NaN	NaN	NaN	NaN	NaN	NaN	NaN
A0A1D8PFL9	Rpl14	19.0813	19.197	19.3413	18.5165	19.1941	19.707	19.2821	18.7782	19.8048	NaN	NaN	NaN	NaN	NaN	NaN	NaN	NaN	NaN
A0A1D8PFR4	Act1	21.765	21.5123	21.2473	22.2704	21.8345	21.8676	21.7505	21.8681	21.8374	20.8163	21.9803	20.7093	23.2316	20.8115	21.7405	20.9006	NaN	21.1056
A0A1D8PFV1	Rpl4b	20.9456	20.7556	21.6529	20.2467	20.9502	21.5687	20.6566	20.5346	21.258	NaN	NaN	NaN	NaN	NaN	NaN	NaN	NaN	NaN
A0A1D8PG16	Rpl38	NaN	20.1905	20.4221	19.4438	20.1197	20.5287	19.9234	19.4828	21.1481	NaN	NaN	NaN	NaN	NaN	NaN	NaN	NaN	NaN
A0A1D8PGY8	Rps9b	18.9606	19.0297	19.1649	18.2029	19.0803	20.4136	18.7807	18.8374	19.0449	NaN	NaN	NaN	NaN	NaN	NaN	NaN	NaN	NaN
A0A1D8PH21	Rpl39	20.7756	21.4343	21.6964	20.5629	21.1276	21.7614	21.4224	21.2804	21.626	NaN	NaN	NaN	NaN	NaN	NaN	NaN	NaN	NaN
A0A1D8PHF5	Rpl31b	19.3343	NaN	19.4166	18.899	19.1747	19.6709	NaN	NaN	19.5485	NaN	NaN	NaN	NaN	NaN	NaN	NaN	NaN	NaN
A0A1D8PHF8	Wh11	NaN	17.2368	NaN	NaN	NaN	NaN	18.4189	18.1855	21.2218	NaN	NaN	NaN	NaN	NaN	NaN	NaN	NaN	NaN
A0A1D8PJ01	Pma1	19.582	19.694	20.4078	19.5049	19.5483	20.3979	19.4567	19.1673	19.5748	NaN	NaN	NaN	NaN	NaN	NaN	NaN	NaN	NaN
A0A1D8PK30	Rpl35	20.6288	NaN	20.921	19.6063	20.5447	21.1594	20.4441	20.2707	21.2493	NaN	NaN	NaN	NaN	NaN	NaN	NaN	NaN	NaN
A0A1D8PK40	Rpl19a	20.8084	21.8238	22.1534	20.1754	21.2507	21.9184	20.7945	20.9413	21.7838	NaN	NaN	NaN	NaN	NaN	NaN	NaN	NaN	NaN
A0A1D8PK43	Rpl18	18.9824	19.2545	19.8401	18.1712	19.3346	19.4847	18.7731	18.6944	19.6287	NaN	NaN	NaN	NaN	NaN	NaN	NaN	NaN	NaN
A0A1D8PKE0	Utr1	21.7554	19.6423	20.1245	20.0798	20.4567	21.0776	20.949	19.1217	19.9584	NaN	NaN	NaN	NaN	NaN	NaN	NaN	NaN	NaN
A0A1D8PKZ9	Atp2	18.5758	18.4053	18.5033	18.6687	18.4744	18.7096	19.1172	18.5751	18.433	NaN	NaN	NaN	NaN	NaN	NaN	NaN	NaN	NaN
A0A1D8PL78	Crd2	17.0301	17.5704	17.307	17.3075	NaN	NaN	NaN	NaN	22.1181	NaN	NaN	NaN	NaN	NaN	NaN	NaN	NaN	NaN
A0A1D8PL99	Rps6a	20.8306	21.3132	21.6329	NaN	21.0244	22.6265	20.2641	20.435	21.1715	19.0291	NaN	NaN	NaN	NaN	NaN	NaN	NaN	NaN
A0A1D8PLC9	Rpl20b	19.4866	19.7924	20.208	NaN	19.7043	20.0566	NaN	NaN	19.843	NaN	NaN	NaN	NaN	NaN	NaN	NaN	NaN	NaN
A0A1D8PM97	Rad59	29.7029	31.7648	30.0509	26.2289	25.5186	25.2886	26.2042	29.4581	32.2332	NaN	NaN	NaN	NaN	NaN	NaN	NaN	NaN	NaN
A0A1D8PN83	Rps11a	20.6571	21.0924	21.8541	19.677	21.2644	21.8887	20.5409	20.3694	21.2517	NaN	NaN	NaN	NaN	NaN	NaN	18.6438	NaN	NaN
A0A1D8PP43	Adh1	NaN	18.2616	19.404	NaN	18.0928	18.7978	NaN	18.2859	19.5045	NaN	NaN	NaN	NaN	NaN	NaN	NaN	NaN	NaN
A0A1D8PPE0	Rps13	NaN	18.6104	19.1716	NaN	18.6565	19.7118	NaN	NaN	18.5458	NaN	NaN	NaN	NaN	NaN	NaN	NaN	NaN	NaN
A0A1D8PPN6	Rpl32	19.8417	19.9098	20.4963	19.3543	20.4719	20.5807	19.8701	19.6935	20.8787	NaN	NaN	NaN	NaN	NaN	NaN	18.6751	NaN	NaN
A0A1D8PQS0	Rpp0	19.7729	21.3176	20.3746	18.9125	20.288	20.2806	19.4954	20.2597	20.6427	NaN	NaN	NaN	NaN	NaN	NaN	NaN	NaN	NaN
A0A1D8PRJ6	Sui3	NaN	NaN	15.8304	NaN	15.2687	18.1802	NaN	NaN	15.1258	NaN	NaN	NaN	NaN	NaN	NaN	NaN	NaN	NaN
A0A1D8PTD1	Ura2	18.9278	19.362	19.1016	18.4677	19.3926	19.7467	18.7924	18.8603	19.1807	NaN	NaN	NaN	NaN	NaN	NaN	NaN	NaN	NaN
A0A1D8PTD6	Cr_06980wp	20.9613	19.892	17.9861	20.7949	19.3754	19.8145	21.4426	19.2295	19.3562	NaN	NaN	NaN	NaN	NaN	NaN	NaN	NaN	NaN
A0A1D8PTR4	Rps29a	19.4803	20.8056	21.8176	NaN	20.1482	21.3251	NaN	21.0333	21.2852	NaN	NaN	NaN	NaN	NaN	NaN	NaN	NaN	NaN
A0A1D8PTV4	Tub1	19.472	19.3664	19.161	18.738	19.9439	19.8868	19.3273	19.0043	19.1515	NaN	NaN	NaN	NaN	NaN	NaN	NaN	NaN	NaN
A0A1D8PU46	Sik1	18.1931	18.2169	17.9814	NaN	18.2293	18.4621	17.4879	17.6727	17.6576	NaN	NaN	NaN	NaN	NaN	NaN	NaN	NaN	NaN
O42817	Rps0	17.6556	18.3668	18.3106	17.4995	18.0588	18.904	NaN	18.0366	18.3032	NaN	NaN	NaN	NaN	NaN	NaN	NaN	NaN	NaN
O43101	Cbf5	18.6102	18.706	19.3033	NaN	18.398	19.751	17.9609	17.6168	18.365	NaN	NaN	NaN	NaN	NaN	NaN	NaN	NaN	NaN
O59931	Rpl13	21.3054	22.2916	22.4478	20.9159	21.7887	22.2646	21.6032	21.5286	22.4204	NaN	NaN	NaN	NaN	NaN	NaN	NaN	NaN	NaN
O93827	Mpg1	20.0171	20.5169	20.9603	18.6071	21.5445	21.4481	19.4293	19.7307	20.4897	19.1977	NaN	NaN	NaN	20.1084	NaN	NaN	NaN	NaN
P25997	Cef3	19.5737	19.6305	20.102	NaN	19.129	20.5204	NaN	19.2572	19.6055	NaN	NaN	NaN	NaN	NaN	NaN	NaN	NaN	NaN
P41797;A0A1D8PG96	Ssa1	21.1059	20.4886	20.8673	21.114	20.7204	20.6273	20.7082	19.9423	20.7717	NaN	NaN	NaN	NaN	NaN	NaN	NaN	NaN	NaN
P46598	Hsp90	19.7	21.3803	21.8221	18.9878	20.3692	21.6329	19.3532	20.1578	21.8673	NaN	NaN	18.7255	NaN	19.5013	NaN	NaN	NaN	NaN
P83774	Asc1	18.5901	NaN	18.7984	NaN	18.9637	19.1763	NaN	18.6768	NaN	NaN	NaN	NaN	NaN	NaN	NaN	NaN	NaN	NaN
P87206	Tif1	20.5524	23.3131	22.7159	19.3647	23.2874	23.1755	19.7854	22.0028	22.5023	19.3914	18.4827	18.0712	NaN	NaN	18.7259	NaN	NaN	NaN
Q59KV8	Lsp1	NaN	NaN	19.1594	NaN	18.0107	NaN	17.4333	17.841	NaN	NaN	NaN	NaN	NaN	NaN	NaN	NaN	NaN	NaN
Q59LS1	Rpl3	19.2271	19.5354	19.6822	18.8929	19.3491	20.4245	19.3146	19.277	19.6606	NaN	NaN	NaN	NaN	NaN	NaN	NaN	NaN	NaN
Q59P43	Gsp1	18.1481	18.6216	18.4534	NaN	18.5419	18.2533	NaN	18.1116	19.1062	NaN	NaN	NaN	NaN	NaN	NaN	NaN	NaN	NaN
Q59QD6;P0CY35	Tef2	24.7765	25.8471	25.8108	23.6491	24.8831	25.3082	23.9927	25.0413	25.7152	22.3266	22.3903	22.0641	19.748	22.497	22.4971	20.3659	21.2895	18.6888
Q59RP7	Mrpl4	19.9837	18.1115	NaN	18.8965	NaN	NaN	NaN	NaN	NaN	NaN	NaN	NaN	NaN	NaN	NaN	NaN	NaN	NaN
Q59T44	Rps8a	19.2481	19.3559	20.293	18.6971	19.4082	20.0455	18.8547	18.6123	19.6944	NaN	NaN	NaN	NaN	NaN	NaN	NaN	NaN	NaN
Q59TE0	Rpl17b	19.5031	19.8848	20.7677	19.2373	19.5603	20.1675	19.7377	19.3871	20.5787	NaN	NaN	NaN	NaN	NaN	NaN	18.4131	NaN	NaN
Q59WG3	Cdc48	22.8627	21.9041	22.2939	22.6573	21.789	21.9214	23.3944	21.4367	22.4617	NaN	NaN	NaN	NaN	NaN	NaN	NaN	NaN	NaN
Q5A0M4	Eft2	20.4253	20.9607	21.6764	20.2107	20.4028	20.6354	20.5148	20.2413	21.4546	NaN	NaN	19.1976	NaN	NaN	NaN	NaN	NaN	NaN
Q5A0V9	Nop1	18.6285	18.6697	20.0441	17.8404	18.602	18.8459	18.1642	18.1767	18.1712	NaN	NaN	NaN	NaN	NaN	NaN	NaN	NaN	NaN
Q5A1E8	Sdh12	NaN	17.8947	18.3549	NaN	NaN	NaN	NaN	NaN	18.088	NaN	NaN	NaN	NaN	NaN	NaN	NaN	NaN	NaN
Q5A397	Ssb1	22.472	22.2751	22.9021	21.9465	22.1866	23.0652	21.6843	21.5469	22.1887	NaN	NaN	18.9784	NaN	20.816	NaN	NaN	NaN	NaN
Q5A4E2;Q59PR3	Ded1	18.2207	19.4393	18.9567	NaN	18.026	18.3293	NaN	17.8883	NaN	NaN	NaN	NaN	NaN	NaN	NaN	NaN	NaN	NaN
Q5A4P2	Coq3	22.0129	NaN	21.7338	22.3792	22.0062	21.6405	23.2325	22.5422	22.3354	NaN	NaN	NaN	NaN	NaN	NaN	NaN	NaN	NaN
Q5A4Q1	Adk1	NaN	17.4387	17.2271	NaN	NaN	16.6115	NaN	17.0643	18.2022	NaN	NaN	NaN	NaN	NaN	NaN	NaN	NaN	NaN
Q5A516	Pet9	21.6163	22.5659	22.5921	20.309	22.3916	22.6115	20.4931	21.8471	22.1386	18.6406	17.4617	18.2081	NaN	19.0596	18.7527	17.4305	NaN	NaN
Q5A5Q8;A0A1D8PCI6	Rps4a	NaN	19.2246	19.1385	NaN	NaN	20.1674	18.4244	18.5767	NaN	NaN	NaN	NaN	NaN	NaN	NaN	NaN	NaN	NaN
Q5A5V6	Pdb1	NaN	18.2182	19.1637	NaN	NaN	NaN	18.8197	NaN	18.082	NaN	NaN	NaN	NaN	NaN	NaN	NaN	NaN	NaN
Q5A6A1	Rpl24a	21.456	21.4076	21.721	20.5597	21.3332	21.9274	21.1222	20.9227	21.6632	NaN	NaN	NaN	NaN	NaN	NaN	NaN	NaN	NaN
Q5A6R1	Rpl15a	19.5131	20.5464	20.341	18.4031	19.6823	21.0655	19.0871	19.3819	20.4601	NaN	NaN	NaN	NaN	NaN	NaN	NaN	NaN	NaN
Q5A7K0	Rps24	20.1732	20.6526	20.9343	18.8618	20.0115	21.0655	19.4821	19.2626	19.8761	NaN	NaN	NaN	NaN	NaN	NaN	NaN	NaN	NaN
Q5ABC3	Tuf1	19.4892	19.8193	19.8833	18.6672	19.8175	20.1528	19.1443	NaN	19.706	NaN	NaN	NaN	NaN	NaN	NaN	NaN	NaN	NaN
Q5ADM7	Tdh3	21.5935	21.0352	22.0113	21.9316	21.2657	22.3619	22.079	21.3786	23.2999	NaN	NaN	NaN	NaN	NaN	NaN	NaN	NaN	NaN
Q5ADQ6	Rps12	19.3197	19.9666	20.1971	NaN	19.8222	20.1269	19.787	19.6244	NaN	NaN	NaN	NaN	NaN	NaN	NaN	NaN	NaN	NaN
Q5AHY8	Mrpl27	19.4394	NaN	16.6789	NaN	17.2603	NaN	NaN	16.5503	NaN	NaN	NaN	NaN	NaN	NaN	NaN	NaN	NaN	NaN
Q5AJ93	Rps7a	NaN	18.9365	19.5487	NaN	19.7511	19.412	18.2415	18.133	18.6403	17.8568	NaN	NaN	NaN	18.7903	18.0813	18.1302	NaN	NaN
Q5ANA1;A0A1D8PF11	Rpl8b	20.5904	20.8376	21.5483	19.9342	20.7227	21.5772	20.7115	20.5606	20.8603	NaN	NaN	NaN	NaN	NaN	NaN	NaN	NaN	NaN
Q5AP79	Mir1	NaN	19.751	19.5535	18.9696	NaN	19.9475	NaN	NaN	19.444	NaN	NaN	NaN	NaN	NaN	NaN	NaN	NaN	NaN
Q9P840	Yae1	22.2266	21.5755	21.3279	22.056	21.7997	21.5382	22.7122	20.8247	21.6068	NaN	NaN	NaN	NaN	NaN	NaN	NaN	NaN	NaN
Q9Y7F0;P0CU34	Tsa1	17.9247	17.9841	17.8408	17.8276	17.7675	17.8628	18.1634	NaN	19.6224	NaN	NaN	NaN	NaN	NaN	NaN	NaN	NaN	NaN
