# Supplementary material for: The RSC (Remodels the Structure of Chromatin) complex of Candida albicans shows compositional divergence with distinct roles in regulating pathogenic traits
Source: PLoS Genet. 2020 Nov 5;16(11):e1009071. doi: 10.1371/journal.pgen.1009071 (PMC7671503; doi:10.1371/journal.pgen.1009071)
Supplement: S2 Table — (XLSX) [file pgen.1009071.s011.xlsx]

## Sheet: S2 Table-Number of spectra
Protein ID (Uniprot)	Immunoprecipitation Replicate 1			Immunoprecipitation Replicate 2			No antibody control Replicate 1			No antibody control Replicate 2			Systematic gene name	Standard name	Description
	No tag	Nri1-Myc	Nri2-Myc	No tag	Nri1-Myc	Nri2-Myc	No tag	Nri1-Myc	Nri2-Myc	No tag	Nri1-Myc	Nri2-Myc
A0A1D8PG62 - Rsc7	#N/A	11	11	#N/A	23	39	#N/A	#N/A	#N/A	#N/A	#N/A	#N/A	C2_00710W_A	NPL6	Putative nuclear protein localization factor; Hap43-induced; Spider biofilm repressed
Q5ALY5 - Nri1- C2_01370cp	#N/A	9	3	#N/A	17	9	#N/A	#N/A	#N/A	#N/A	#N/A	#N/A	C2_01370C_A	C2_01370C_A	Ortholog of C. dubliniensis CD36 : Cd36_16230, C. parapsilosis CDC317 : CPAR2_213950, C. auris B8441 : B9J08_003853 and Candida tenuis NRRL Y-1498 : CANTEDRAFT_112720
A0A1D8PFW3 - Rsc8	#N/A	6	5	#N/A	15	39	#N/A	#N/A	#N/A	#N/A	#N/A	#N/A	C1_14240W_A	C1_14240W_A	Putative RSC chromatin remodeling complex component; possibly an essential gene, disruptants not obtained by UAU1 method
A0A1D8PCV8 - Rsc1	#N/A	4	5	#N/A	15	31	#N/A	#N/A	#N/A	#N/A	#N/A	#N/A	C1_02750C_A	C1_02750C_A	Ortholog(s) have DNA translocase activity
A0A1D8PJG4 - Sth1	#N/A	4	5	#N/A	14	31	#N/A	#N/A	#N/A	#N/A	#N/A	#N/A	C3_02490C_A	C3_02490C_A	Putative ATP-dependent helicase; induced by nitric oxide
A0A1D8PG45 - Rsc58	#N/A	4	4	#N/A	5	17	#N/A	#N/A	#N/A	#N/A	#N/A	#N/A	C2_00570W_A	C2_00570W_A	Ortholog(s) have DNA translocase activity, role in chromatin remodeling, nucleosome disassembly, transcription elongation from RNA polymerase II promoter and RSC-type complex localization
A0A1D8PG88 - Rsc4	#N/A	4	3	#N/A	7	14	#N/A	#N/A	#N/A	#N/A	#N/A	#N/A	C2_00830C_A	C2_00830C_A	Ortholog(s) have DNA translocase activity, lysine-acetylated histone binding activity and role in ATP-dependent chromatin remodeling, nucleosome disassembly, transcription elongation from RNA polymerase II promoter
Q5A9X7 - Arp9	#N/A	3	2	#N/A	3	4	#N/A	#N/A	#N/A	#N/A	#N/A	#N/A	C3_01030W_A	ARP9	Protein similar to S. cerevisiae Arp3p, a component of the Arp2/3 complex involved in actin-dependent processes; likely to be essential for growth, based on an insertional mutagenesis strategy
Q59T87 - Nri2 - C1_01800wp	#N/A	2	1	#N/A	4	18	#N/A	#N/A	#N/A	#N/A	#N/A	#N/A	C1_01800W_A	C1_01800W_A	Ortholog of C. dubliniensis CD36 : Cd36_01640, C. parapsilosis CDC317 : CPAR2_106830, C. auris B8441 : B9J08_004660 and Candida tenuis NRRL Y-1498 : cten_CGOB_00039
Q5AA11 - Rsc9	#N/A	2	3	#N/A	5	7	#N/A	#N/A	#N/A	#N/A	#N/A	#N/A	C1_05780W_A	C1_05780W_A	Putative RSC chromatin remodeling complex component; decreased transcription is observed upon fluphenazine treatment or in an azole-resistant strain that overexpresses CDR1 and CDR2
A0A1D8PHT4 - Snf12	#N/A	1	2	#N/A	6	17	#N/A	#N/A	#N/A	#N/A	#N/A	#N/A	C2_07100W_A	C2_07100W_A	Ortholog(s) have DNA translocase activity and role in positive regulation of transcription by RNA polymerase II, positive regulation of transcription from RNA polymerase II promoter in response to amino acid starvation
A0A1D8PCD3 - C1_01010Wp	#N/A	1	1	#N/A	3	4	#N/A	#N/A	#N/A	#N/A	#N/A	#N/A	C1_01010W_A	C1_01010W_A	Plasma membrane-localized protein; repressed by nitric oxide; Hap43p-repressed gene
A0A1D8PEB6 - Sfh1	#N/A	1	1	#N/A	2	3	#N/A	#N/A	#N/A	#N/A	#N/A	#N/A	C1_08160W_A	C1_08160W_A	Ortholog(s) have DNA translocase activity
A0A1D8PC97	#N/A	#N/A	#N/A	1	1	3	#N/A	#N/A	#N/A	#N/A	#N/A	#N/A	C1_00710C_A	TUB2	Beta-tubulin; functional homolog of ScTub2; overproduction makes S. cerevisiae inviable; has two introns; GlcNAc, hypha fluconazole-induced; slow growth, ectopic expression increases white-to opaque switch; rat catheter biofilm repressed
A0A1D8PCG7	3	#N/A	#N/A	4	14	3	#N/A	#N/A	#N/A	#N/A	#N/A	#N/A	C1_01370C_A	RPS21B	Ribosomal protein S21; regulated by Nrg1, Tup1; colony morphology-related gene regulation by Ssn6; positively regulated by Tbf1, Hap43; Spider biofilm repressed
A0A1D8PCI6	0	0	0	0	0	0	#N/A	#N/A	#N/A	#N/A	#N/A	#N/A	C1_01640W_A	RPS42	Predicted ribosomal protein S4, component of the small ribosomal subunit; has paralog RPS41
A0A1D8PCJ1	17	9	7	18	19	13	#N/A	#N/A	#N/A	#N/A	#N/A	#N/A	C1_01600W_A	MRP20	Component of mitochondrial ribosome; decreased expression in hyphae compared to yeast-form cells
A0A1D8PCQ5	25	14	15	22	38	22	3	#N/A	4	#N/A	#N/A	3	C1_02330C_A	C1_02330C_A	Ribosomal 60S subunit protein; Spider biofilm repressed
A0A1D8PCS6	#N/A	#N/A	#N/A	#N/A	#N/A	#N/A	#N/A	#N/A	6	2	#N/A	#N/A	C1_02580W_A	HNM4	Putative choline permease; fungal-specific (no human or murine homolog)
A0A1D8PCT0	16	10	2	18	24	26	#N/A	#N/A	#N/A	#N/A	#N/A	#N/A	C1_02420C_A	GSC1	Essential beta-1,3-glucan synthase subunit; gsc1 allele determines resistance/sensitivity to echinocandins; 16 predicted membrane-spanning regions; mRNA abundance declines after yeast-to-hypha transition; Spider biofilm induced
A0A1D8PCW6	7	2	3	8	11	9	#N/A	#N/A	#N/A	#N/A	#N/A	#N/A	C1_03030W_A	RPS16A	Putative 40S ribosomal subunit; macrophage/pseudohyphal-induced after 16 h; Spider biofilm repressed
A0A1D8PCX8	10	3	1	8	15	12	#N/A	#N/A	2	#N/A	#N/A	#N/A	C1_03110W_A	RPL6	Ortholog of S. cerevisiae ribosomal subunit, Rpl6B; transposon mutation affects filamentous growth; translation-related genes are downregulated upon phagocytosis by murine macrophage; Hap43-induced; Spider biofilm repressed
A0A1D8PCY4	#N/A	#N/A	#N/A	7	8	3	#N/A	#N/A	#N/A	#N/A	#N/A	#N/A	C1_03190C_A	ECM33	GPI-anchored cell wall protein; mutants show cell-wall defects and reduced adhesion, host cell damage, and endocytosis; mutant infection is immunoprotective in murine model; fluconazole-induced; caspofungin repressed
A0A1D8PCZ5	#N/A	#N/A	#N/A	#N/A	2	2	#N/A	#N/A	#N/A	#N/A	#N/A	#N/A	C1_03310W_A	C1_03310W_A	Putative DNA translocase; Spider biofilm repressed
A0A1D8PD97	5	3	1	5	7	8	#N/A	#N/A	#N/A	#N/A	#N/A	#N/A	C1_04360C_A	C1_04360C_A	Has domain(s) with predicted ATPase inhibitor activity, role in negative regulation of ATPase activity, negative regulation of nucleotide metabolic process and mitochondrion localization
A0A1D8PDC0	6	#N/A	#N/A	#N/A	#N/A	#N/A	#N/A	#N/A	#N/A	#N/A	#N/A	#N/A	C1_04690C_A	REC8	Protein involved in control of chromosome stability and homologous recombination during meiosis-like concerted chromosome loss (CCL) process that leads to depolyploidization after mating
A0A1D8PDC4	12	9	7	14	33	30	#N/A	#N/A	2	#N/A	#N/A	2	C1_04610W_A	ATP1	ATP synthase alpha subunit; antigenic in human/mouse; at hyphal surface; ciclopirox, ketoconazole, flucytosine induced; Efg1, caspofungin repressed; may be essential; sumoylation target; stationary phase-enriched; Spider biofilm repressed
A0A1D8PDD1	#N/A	#N/A	#N/A	1	2	3	#N/A	#N/A	#N/A	#N/A	#N/A	#N/A	C1_04680W_A	PIL1	Eisosome component; predicted role in endocytosis; echinocandin-binding protein; localizes to cell surface of hyphae, but not yeast-form cells; Hap43, YNB biofilm induced; rat catheter biofilm repressed
A0A1D8PDI1	1	1	#N/A	1	3	2	#N/A	#N/A	#N/A	#N/A	#N/A	#N/A	C1_05190C_A	C1_05190C_A	Protein with a NADH-ubiquinone oxidoreductase B18 subunit domain; gene has intron
A0A1D8PDL6	6	3	2	9	10	10	1	#N/A	2	#N/A	#N/A	2	C1_05720W_A	C1_05720W_A	60S ribosomal protein L7; snoRNA snR39b encoded within the 2nd intron
A0A1D8PDL7	#N/A	#N/A	#N/A	#N/A	1	#N/A	#N/A	#N/A	#N/A	#N/A	#N/A	#N/A	C1_05630C_A	C1_05630C_A	Putative karyopherin beta; repressed by nitric oxide
A0A1D8PDP8	#N/A	#N/A	#N/A	#N/A	1	#N/A	#N/A	#N/A	#N/A	#N/A	#N/A	#N/A	C1_06050C_A	C1_06050C_A	Ortholog(s) have ubiquinol-cytochrome-c reductase activity, role in aerobic respiration, mitochondrial electron transport, ubiquinol to cytochrome c and mitochondrial respiratory chain complex III localization
A0A1D8PDT3	7	2	4	8	17	12	2	#N/A	2	#N/A	#N/A	1	C1_06450C_A	RPS14B	Putative ribosomal protein; repressed upon phagocytosis by murine macrophage; transcript positively regulated by Tbf1; Spider biofilm repressed
A0A1D8PDT4	5	2	2	7	10	3	#N/A	#N/A	#N/A	#N/A	#N/A	#N/A	C1_06470W_A	C1_06470W_A	Ortholog of S. cerevisiae Rpl39; a component of the 60S ribosomal subunit; Hap43-induced; Spider biofilm repressed
A0A1D8PDU3	7	#N/A	#N/A	9	11	8	2	#N/A	2	#N/A	#N/A	2	C1_06580W_A	RPS23A	Putative ribosomal protein; repressed upon phagocytosis by murine macrophage; Spider biofilm repressed
A0A1D8PDX5	#N/A	#N/A	#N/A	1	2	#N/A	#N/A	#N/A	#N/A	#N/A	#N/A	#N/A	C1_06900C_A	MMD1	Mitochondrial protein; possibly required for transamination of isoleucine; macrophage-downregulated protein abundance; rat catheter and Spider biofilm repressed
A0A1D8PDZ1	3	#N/A	2	3	4	3	#N/A	#N/A	1	#N/A	#N/A	#N/A	C1_06890C_A	C1_06890C_A	Ribosomal 60S subunit protein; Spider biofilm repressed
A0A1D8PE69	#N/A	#N/A	#N/A	#N/A	5	#N/A	#N/A	#N/A	#N/A	#N/A	#N/A	#N/A	C1_08080C_A	C1_08080C_A	Ortholog of C. dubliniensis CD36 : Cd36_07590, C. parapsilosis CDC317 : CPAR2_206680, C. auris B8441 : B9J08_004229 and Candida tenuis NRRL Y-1498 : CANTEDRAFT_104385
A0A1D8PEG3	#N/A	#N/A	#N/A	#N/A	#N/A	3	#N/A	#N/A	#N/A	#N/A	#N/A	#N/A	C1_08990C_A	KEX2	Subtilisin-like protease (proprotein convertase); processes aspartyl proteinase Sap2; required for hyphal growth and wild-type virulence in mice; required for maturation of candidalysin Ece1p
A0A1D8PEH3	2	#N/A	#N/A	#N/A	#N/A	#N/A	1	#N/A	#N/A	#N/A	#N/A	#N/A	C1_08940C_A	MSN4	Zinc finger transcription factor; similar to S. cerevisiae Msn4, but not a significant stress response regulator in C. albicans; partly complements STRE-activation defect of S. cerevisiae msn2 msn4 double mutant; flow model biofilm induced
A0A1D8PEM5	#N/A	#N/A	#N/A	2	2	2	#N/A	#N/A	#N/A	#N/A	#N/A	#N/A	C1_09630W_A	IDH1	Putative mitochondrial NAD-isocitrate dehydrogenase subunit 1; soluble protein in hyphae; protein level decrease in stationary phase cultures
A0A1D8PES3	#N/A	#N/A	#N/A	#N/A	4	#N/A	#N/A	#N/A	#N/A	#N/A	#N/A	#N/A	C1_10100C_A	NTF2	Putative nuclear envelope protein; regulated by Ssn6; rat catheter biofilm repressed
A0A1D8PEV4	4	#N/A	#N/A	4	3	2	#N/A	#N/A	#N/A	#N/A	#N/A	#N/A	C1_10390C_A	RPL42	Putative 60S ribosomal subunit protein; colony morphology-related gene regulation by Ssn6; Spider biofilm repressed
A0A1D8PEW0	#N/A	#N/A	#N/A	#N/A	#N/A	#N/A	2	#N/A	#N/A	2	#N/A	2	C1_10540C_A	C1_10540C_A	Putative adapter protein; links synaptojanins Inp52 and Inp53 to the cortical actin cytoskeleton in S. cerevisiae; mutants are viable
A0A1D8PEY9	4	5	4	6	10	8	#N/A	#N/A	1	#N/A	#N/A	#N/A	C1_10870W_A	RPS17B	Ribosomal protein 17B; downregulated upon phagocytosis by murine macrophages; Hap43-induced; Spider biofilm repressed
A0A1D8PEZ3	#N/A	#N/A	#N/A	#N/A	1	#N/A	#N/A	#N/A	#N/A	#N/A	#N/A	#N/A	C1_10890C_A	C1_10890C_A	Ortholog of C. dubliniensis CD36 : Cd36_10220, C. parapsilosis CDC317 : CPAR2_210530, C. auris B8441 : B9J08_000256 and Candida tenuis NRRL Y-1498 : CANTEDRAFT_105553
A0A1D8PF08	18	5	5	18	23	20	2	#N/A	4	1	1	2	C1_11060C_A	RPL2	Putative 60S ribosomal protein L2; Hap43-induced gene; repressed in infected rabbit kidney in SC5314, but not NGY152, strain background; Spider biofilm repressed
A0A1D8PF11	#N/A	#N/A	#N/A	#N/A	#N/A	#N/A	0	#N/A	0	0	0	0	C1_11030W_A	RPL82	Predicted ribosomal protein; genes encoding cytoplasmic ribosomal subunits, translation factors, and tRNA synthetases are downregulated upon phagocytosis by murine macrophage
A0A1D8PF45	7	4	#N/A	10	13	11	#N/A	#N/A	#N/A	#N/A	#N/A	#N/A	C1_11360W_A	RPL37B	Ribosomal protein L37; Hap43-induced; Spider biofilm repressed
A0A1D8PF48	#N/A	#N/A	#N/A	#N/A	4	#N/A	#N/A	#N/A	#N/A	#N/A	#N/A	#N/A	C1_10940C_A	ERP5	Protein involved in ER to Golgi transport; rat catheter and Spider biofilm repressed
A0A1D8PF56	#N/A	#N/A	#N/A	#N/A	6	6	#N/A	#N/A	#N/A	#N/A	#N/A	#N/A	C1_11550W_A	GAR1	Putative H/ACA snoRNP pseudouridylase complex protein; mutation confers hypersensitivity to tubercidin (7-deazaadenosine); macrophage/pseudohyphal-induced; Spider biofilm repressed
A0A1D8PF57	3	2	2	4	6	4	#N/A	#N/A	#N/A	#N/A	#N/A	#N/A	C1_11040W_A	RPL29	Ribosomal protein L29; induced upon germ tube formation; colony morphology-related gene regulation by Ssn6; intron in 5'-UTR; Spider biofilm repressed
A0A1D8PFC1	1	#N/A	#N/A	2	2	2	#N/A	#N/A	#N/A	#N/A	#N/A	#N/A	C1_12240C_A	C1_12240C_A	Predicted alanine-tRNA ligase; oxidative stress-induced via Cap1
A0A1D8PFD4	#N/A	1	#N/A	1	3	1	#N/A	#N/A	#N/A	#N/A	#N/A	#N/A	C1_12320C_A	ATP19	Subunit k of the mitochondrial F1F0 ATP synthase; a large enzyme complex required for ATP synthesis; Spider biofilm repressed
A0A1D8PFE1	#N/A	#N/A	#N/A	#N/A	2	1	#N/A	#N/A	#N/A	#N/A	#N/A	#N/A	C1_12310C_A	CSI2	Putative 66S pre-ribosomal particle component; Hap43-induced; essential for growth; transposon mutation affects filamentous growth; Spider biofilm induced
A0A1D8PFG4	18	6	3	14	23	22	#N/A	#N/A	3	#N/A	#N/A	1	C1_12390C_A	RPL27A	Ribosomal protein L27; Spider biofilm repressed
A0A1D8PFK5	7	1	1	4	5	7	#N/A	#N/A	#N/A	#N/A	#N/A	#N/A	C1_13110C_A	CHS3	Major chitin synthase of yeast and hyphae; synthesizes short-chitin fibrils; Chs4-activated; transcript induced at yeast-hyphal transition; Chs1 and Chs2, but not Chs3, are inhibited by the protoberberine HWY-289; Spider biofilm induced
A0A1D8PFL9	9	1	2	8	13	12	#N/A	#N/A	#N/A	#N/A	#N/A	#N/A	C1_13050W_A	RPL14	Ribosomal protein L14; promoter bound directly by Tbf1p; Hap43p-induced gene
A0A1D8PFR4	#N/A	#N/A	#N/A	3	7	3	#N/A	#N/A	#N/A	6	3	#N/A	C1_13700W_A	ACT1	Actin; gene has intron; transcript regulated by growth phase, starvation; at polarized growth site in budding and hyphal cells; required for wild-type Cdc42 localization; unprocessed N terminus; Hap43-induced; Spider biofilm repressed
A0A1D8PFS0	5	2	2	8	5	8	#N/A	#N/A	#N/A	#N/A	#N/A	#N/A	C1_13690C_A	C1_13690C_A	Ortholog(s) have SNAP receptor activity and role in Golgi to plasma membrane transport, endocytosis, exocytosis, prospore membrane biogenesis, vesicle fusion, vesicle-mediated transport
A0A1D8PFS4	#N/A	#N/A	#N/A	1	2	#N/A	#N/A	#N/A	#N/A	#N/A	#N/A	#N/A	C1_13860C_A	GND1	6-phosphogluconate dehydrogenase; soluble in hyphae; farnesol, macrophage-induced protein; antigenic in mice; dual localization to cytosol and peroxisomes depends on alternative splicing; rat catheter and Spider biofilm repressed
A0A1D8PFU8	#N/A	#N/A	#N/A	2	2	#N/A	#N/A	#N/A	#N/A	#N/A	#N/A	#N/A	C1_14090W_A	C1_14090W_A	Ortholog(s) have chaperone binding, unfolded protein binding activity and role in chaperone-mediated protein complex assembly, protein folding, protein import into mitochondrial intermembrane space, protein refolding
A0A1D8PFV1	13	8	7	19	32	19	#N/A	#N/A	#N/A	#N/A	#N/A	#N/A	C1_14110C_A	RPL4B	Ribosomal protein 4B; repressed upon phagocytosis by murine macrophage; Spider biofilm repressed
A0A1D8PFV7	#N/A	#N/A	#N/A	#N/A	2	#N/A	#N/A	#N/A	#N/A	#N/A	#N/A	#N/A	C1_14290C_A	MDG1	Ortholog(s) have role in pheromone-dependent signal transduction involved in conjugation with cellular fusion and membrane raft, plasma membrane localization
A0A1D8PFX2	#N/A	#N/A	#N/A	#N/A	3	2	#N/A	#N/A	#N/A	#N/A	#N/A	#N/A	C1_14390W_A	RPC10	Putative RNA polymerase subunit ABC10-alpha of RNA polymerase complexes I, II, and III; flucytosine induced; Spider biofilm induced
A0A1D8PFX6	6	#N/A	#N/A	8	8	7	#N/A	#N/A	1	#N/A	#N/A	#N/A	C1_14420W_A	DDI1	Putative DNA damage inducible v-SNARE binding protein; macrophage/pseudohyphal-repressed
A0A1D8PFZ5	#N/A	#N/A	#N/A	4	#N/A	1	#N/A	#N/A	#N/A	#N/A	#N/A	#N/A	C1_14630C_A	C1_14630C_A	Similar to a region of the Tca2 (pCal) retrotransposon, which is present in strain hOG1042 as 50 to 100 copies of a linear dsDNA; rat catheter biofilm repressed
A0A1D8PFZ9	#N/A	#N/A	#N/A	#N/A	1	#N/A	#N/A	#N/A	#N/A	#N/A	#N/A	#N/A	C2_00070C_A	MPP10	Putative SSU processome and 90S preribosome component; repressed in core stress response; repressed by prostaglandins
A0A1D8PG09	#N/A	#N/A	#N/A	#N/A	2	#N/A	#N/A	#N/A	#N/A	#N/A	#N/A	#N/A	C2_00250W_A	STF2	Protein involved in ATP biosynthesis; repressed in hyphae; repressed by Efg1, Hap43; transcript upregulated in clinical isolates from HIV+ patients with oral candidiasis; rat catheter, flow model and Spider biofilm induced
A0A1D8PG16	6	4	3	9	26	16	2	#N/A	3	2	#N/A	2	C2_00210W_A	RPL38	60S ribosomal ribosomal protein subunit; genes encoding cytoplasmic ribosomal subunits, translation factors, tRNA synthetases are downregulated upon phagocytosis by murine macrophage
A0A1D8PG50	#N/A	#N/A	#N/A	#N/A	3	#N/A	#N/A	#N/A	#N/A	#N/A	#N/A	#N/A	C2_00610C_A	ATP18	F1F0 ATP synthase complex subunit; gene has intron
A0A1D8PG81	2	1	#N/A	2	8	4	6	#N/A	3	6	#N/A	3	C2_01000W_A	HGT7	Putative MFS glucose transporter; glucose, fluconazole, Snf3 induced, expressed at high glucose; 20 member C. albicans glucose transporter family; 12 TM regions predicted; flow model biofilm induced; Spider biofilm repressed
A0A1D8PG82	#N/A	#N/A	#N/A	#N/A	#N/A	#N/A	0	#N/A	0	0	#N/A	0	C2_01010W_A	HGT8	High-affinity glucose transporter of the major facilitator superfamily; 20 members in the C. albicans glucose transporter family; 12 probable membrane-spanning segments; gene has intron; expressed in rich medium; flow model biofilm induced
A0A1D8PG90	1	#N/A	#N/A	2	2	1	#N/A	#N/A	#N/A	#N/A	#N/A	1	C2_00930C_A	VPS24	Protein similar to S. cerevisiae Vps24p, which is a member of the ESCRT III protein sorting complex; downregulated upon adherence to polystyrene
A0A1D8PG96	#N/A	#N/A	#N/A	1	#N/A	#N/A	#N/A	#N/A	#N/A	0	0	#N/A	C2_01120W_A	KAR2	Similar to Hsp70 family chaperones; role in translocation of proteins into the ER; induced in high iron; protein present in exponential and stationary growth phase yeast cultures; flow model and Spider biofilm repressed
A0A1D8PGA3	#N/A	#N/A	#N/A	2	4	#N/A	#N/A	#N/A	#N/A	#N/A	#N/A	#N/A	C2_01180W_A	COX17	Putative copper metallochaperone; Hap43p-repressed gene; rat catheter biofilm induced; Spider biofilm induced
A0A1D8PGJ8	#N/A	#N/A	#N/A	#N/A	3	#N/A	#N/A	#N/A	#N/A	#N/A	#N/A	#N/A	C2_02170W_A	C2_02170W_A	Possible vacuolar protein; Hap43-induced gene
A0A1D8PGJ9	#N/A	#N/A	#N/A	#N/A	#N/A	2	#N/A	#N/A	#N/A	#N/A	#N/A	#N/A	C2_02310W_A	C2_02310W_A	Plasma membrane-associated protein identified in detergent-resistant membrane fraction (possible lipid raft component); repressed by nitric oxide; predicted transmembrane helix
A0A1D8PGL1	#N/A	#N/A	#N/A	#N/A	2	#N/A	#N/A	#N/A	#N/A	#N/A	#N/A	#N/A	C2_02410W_A	C2_02410W_A	Plasma membrane-localized protein of unknown function
A0A1D8PGP5	#N/A	#N/A	#N/A	#N/A	1	#N/A	#N/A	#N/A	#N/A	#N/A	#N/A	#N/A	C2_02620W_A	C2_02620W_A	Putative mitochondrial protein of unknown function; regulated by Sef1p-, Sfu1p-, and Hap43p
A0A1D8PGY0	5	2	1	4	5	5	#N/A	#N/A	#N/A	#N/A	#N/A	#N/A	C2_03810C_A	RPL21A	Putative ribosomal protein; repressed upon phagocytosis by murine macrophage; Spider biofilm repressed
A0A1D8PGY8	#N/A	#N/A	#N/A	1	6	4	#N/A	#N/A	#N/A	#N/A	#N/A	#N/A	C2_03820C_A	RPS9B	Predicted ribosomal protein; repressed upon phagocytosis by murine macrophage; transcript possibly regulated upon hyphal formation; Spider biofilm repressed
A0A1D8PH00	#N/A	#N/A	#N/A	#N/A	2	#N/A	#N/A	#N/A	#N/A	#N/A	#N/A	#N/A	C2_03790C_A	ASR3	Adenylyl cyclase and stress responsive protein; induced in cyr1 or ras1 mutant; Spider biofilm induced
A0A1D8PH08	#N/A	#N/A	#N/A	#N/A	2	#N/A	#N/A	#N/A	#N/A	#N/A	#N/A	#N/A	C2_03470C_A	COX6	Putative cytochrome c oxidase; flucytosine induced
A0A1D8PH21	17	7	7	22	26	23	#N/A	#N/A	4	1	#N/A	3	C2_03960W_A	RPL39	Ribosomal protein L39; transcript induced upon germ tube formation; colony morphology-related gene regulation by Ssn6; Hap43-induced
A0A1D8PH39	#N/A	#N/A	#N/A	#N/A	1	1	#N/A	#N/A	#N/A	#N/A	#N/A	#N/A	C2_04170C_A	C2_04170C_A	Ortholog of S. cerevisiae : YPR010C-A, C. dubliniensis CD36 : Cd36_02990, C. parapsilosis CDC317 : CPAR2_211020, C. auris B8441 : B9J08_000865 and Candida tenuis NRRL Y-1498 : CANTEDRAFT_116148
A0A1D8PH52	#N/A	#N/A	#N/A	1	4	#N/A	#N/A	#N/A	#N/A	#N/A	#N/A	#N/A	C2_04310W_A	ERG10	Acetyl-CoA acetyltransferase; role in ergosterol biosynthesis; soluble in hyphae; changes in protein abundance associated with azole resistance; fluconazole or ketoconazole induced; macrophage-downregulated protein; GlcNAc-induced protein
A0A1D8PHA0	2	#N/A	#N/A	1	#N/A	2	#N/A	#N/A	#N/A	#N/A	#N/A	#N/A	C2_04820W_A	C2_04820W_A	Ortholog(s) have rRNA (guanine-N1-)-methyltransferase activity, role in rRNA modification and mitochondrion localization
A0A1D8PHA2	#N/A	#N/A	#N/A	#N/A	1	#N/A	#N/A	#N/A	#N/A	#N/A	#N/A	#N/A	C2_04590C_A	QCR8	Putative ubiquinol cytochrome c reductase; macrophage and pseudohyphal-induced protein; colony morphology-related gene regulation by Ssn6; Hap43-repressed; Spider biofilm repressed
A0A1D8PHA3	1	#N/A	#N/A	1	2	1	#N/A	#N/A	#N/A	#N/A	#N/A	#N/A	C2_04950C_A	CYT1	Cytochrome c1; induced in high iron; alkaline repressed; possibly an essential gene, disruptants not obtained by UAU1 method; Hap43-repressed; Spider biofilm repressed
A0A1D8PHD9	#N/A	#N/A	#N/A	#N/A	#N/A	#N/A	#N/A	#N/A	#N/A	#N/A	1	#N/A	C2_05380W_A	C2_05380W_A	Protein of unknown function; S. cerevisiae YLR407W mutants have abnormal budding; constitutive expression independent of MTL or white-opaque status; Spider biofilm induced
A0A1D8PHF5	12	6	2	11	17	15	2	#N/A	3	1	1	2	C2_05410W_A	C2_05410W_A	Ribosomal 60S subunit protein L31B; Spider biofilm repressed
A0A1D8PHF8	3	#N/A	#N/A	8	11	3	#N/A	#N/A	2	#N/A	#N/A	#N/A	C2_05180W_A	WH11	White-phase yeast transcript; expression in opaques increases virulence/switching; mutant switches as WT; Hap43, hypoxia, ketoconazol induced; required for RPMI biofilm; Bcr1-induced in RPMI a/a biofilm; rat catheter, Spider biofilm induced
A0A1D8PHH2	#N/A	#N/A	#N/A	1	#N/A	1	#N/A	#N/A	#N/A	#N/A	#N/A	#N/A	C2_05660W_A	PNG2	Putative peptide:N-glycanase; gene has variable numbers of 12-bp repeats; induced by caspofungin, ciclopirox olamine, ketoconazole or hypoxia; gene of core caspofungin response; Hap43-induced; Spider biofilm induced
A0A1D8PHH4	6	#N/A	#N/A	7	9	9	#N/A	#N/A	#N/A	#N/A	#N/A	#N/A	C2_05710C_A	C2_05710C_A	Ribosomal 60S subunit protein; Spider biofilm repressed
A0A1D8PHI0	#N/A	#N/A	#N/A	1	2	1	#N/A	#N/A	#N/A	#N/A	#N/A	#N/A	C2_05790C_A	RFC1	Putative DNA replication factor C subunit; ortholog of S. cerviaie Rfc1; likely essential, based on an insertional mutagenesis strategy; rat catheter biofilm repressed
A0A1D8PHI5	#N/A	#N/A	1	1	2	3	#N/A	#N/A	#N/A	#N/A	#N/A	#N/A	C2_05930W_A	COX9	Putative subunit VIIa of cytochrome c oxidase; flucytosine induced
A0A1D8PHJ3	#N/A	#N/A	#N/A	#N/A	1	1	#N/A	#N/A	#N/A	#N/A	#N/A	#N/A	C2_05920C_A	COX8	Putative cytochrome c oxidase; flucytosine induced; caspofungin repressed
A0A1D8PHL7	1	1	1	1	2	2	#N/A	#N/A	#N/A	#N/A	#N/A	#N/A	C2_06290C_A	ATP14	Putative mitochondrial F1F0 ATP synthase subunit; macrophage/pseudohyphal-induced
A0A1D8PHW1	3	1	#N/A	4	6	3	#N/A	#N/A	#N/A	#N/A	#N/A	#N/A	C2_06810C_A	RPL11	Ribosomal protein; repressed by phagocytosis; colony morphology-related gene regulation by Ssn6; Hap43-induced; Spider biofilm repressed
A0A1D8PHZ6	#N/A	#N/A	#N/A	#N/A	#N/A	#N/A	10	#N/A	#N/A	12	#N/A	18	C2_07660W_A	PDS5	Putative protein with a predicted role in establishment and maintenance of sister chromatid condensation and cohesion; cell-cycle regulated periodic mRNA expression
A0A1D8PI15	2	1	#N/A	4	6	5	#N/A	#N/A	#N/A	#N/A	#N/A	#N/A	C2_08040C_A	RPS10	Ribosomal protein S10; downregulated in the presence of human whole blood or PMNs; Spider biofilm repressed
A0A1D8PI76	1	3	#N/A	1	3	3	#N/A	#N/A	#N/A	#N/A	#N/A	#N/A	C2_08160C_A	C2_08160C_A	Ortholog(s) have role in ER-dependent peroxisome organization, endoplasmic reticulum inheritance, endoplasmic reticulum organization and endoplasmic reticulum tubular network membrane organization, more
A0A1D8PIL9	#N/A	#N/A	#N/A	#N/A	#N/A	1	#N/A	#N/A	#N/A	#N/A	#N/A	#N/A	C2_09830C_A	C2_09830C_A	Ortholog of C. parapsilosis CDC317 : CPAR2_407330, C. auris B8441 : B9J08_001010, Candida tenuis NRRL Y-1498 : CANTEDRAFT_114646 and Debaryomyces hansenii CBS767 : DEHA2B05654g
A0A1D8PIP0	1	#N/A	#N/A	1	1	1	#N/A	#N/A	#N/A	#N/A	#N/A	#N/A	C2_10290W_A	SLR1	Protein similar to mammalian SR-like RNA splicing factor; involved in filamentous growth and virulence; gene has intron; Spider biofilm repressed
A0A1D8PIQ0	#N/A	#N/A	#N/A	#N/A	12	#N/A	9	#N/A	7	9	7	12	C2_10230W_A	C2_10230W_A	Putative C2H2 transcription factor; expression upregulated in clinical isolates from HIV+ patients with oral candidiasis; Spider biofilm induced
A0A1D8PIS1	#N/A	#N/A	#N/A	#N/A	1	#N/A	#N/A	#N/A	#N/A	#N/A	#N/A	#N/A	C2_10650W_A	C2_10650W_A	Protein of unknown function; protein newly produced during adaptation to the serum
A0A1D8PJ01	15	9	6	16	28	27	#N/A	#N/A	#N/A	#N/A	#N/A	#N/A	C3_00720W_A	PMA1	Plasma membrane H(+)-ATPase; highly expressed, comprises 20-40% of total plasma membrane protein; levels increase at stationary phase transition; fluconazole induced; caspofungin repressed; upregulated in RHE model; Spider biofilm repressed
A0A1D8PJ43	#N/A	#N/A	#N/A	#N/A	1	#N/A	#N/A	#N/A	#N/A	#N/A	#N/A	#N/A	C3_01000W_A	BMS1	Putative GTPase; Hap43-induced gene; mutation confers resistance to 5-fluorocytosine (5-FC); flucytosine induced; repressed by prostaglandins; Spider biofilm induced
A0A1D8PJG0	#N/A	#N/A	#N/A	#N/A	1	#N/A	#N/A	#N/A	#N/A	#N/A	#N/A	#N/A	C3_02400C_A	COX7	Putative cytochrome c oxidase; flucytosine induced; repressed by nitric oxide
A0A1D8PJH6	#N/A	#N/A	#N/A	#N/A	#N/A	#N/A	#N/A	#N/A	#N/A	#N/A	1	#N/A	C3_02660W_A	C3_02660W_A	Protein of unknown function; Spider biofilm induced
A0A1D8PJR3	#N/A	#N/A	#N/A	#N/A	#N/A	1	#N/A	#N/A	#N/A	#N/A	#N/A	#N/A	C3_03340C_A	C3_03340C_A	Ortholog of C. dubliniensis CD36 : Cd36_83290, C. parapsilosis CDC317 : CPAR2_102640, Candida tenuis NRRL Y-1498 : CANTEDRAFT_98613 and Debaryomyces hansenii CBS767 : DEHA2D07282g
A0A1D8PJW1	#N/A	#N/A	#N/A	#N/A	1	#N/A	#N/A	#N/A	#N/A	#N/A	#N/A	#N/A	C3_03400C_A	VTI1	Ortholog(s) have SNAP receptor activity and role in Golgi to vacuole transport, intra-Golgi vesicle-mediated transport, macroautophagy, vacuole fusion, non-autophagic, vesicle fusion
A0A1D8PK11	#N/A	#N/A	#N/A	2	5	2	#N/A	#N/A	#N/A	#N/A	#N/A	#N/A	C3_04590W_A	C3_04590W_A	RNA binding protein required for export of poly(A)+ mRNA from the nucleus; Spider biofilm repressed
A0A1D8PK22	4	#N/A	#N/A	6	8	3	#N/A	#N/A	#N/A	#N/A	#N/A	#N/A	C3_04670C_A	RPS15	Putative ribosomal protein; macrophage/pseudohyphal-induced after 16 h; repressed upon phagocytosis by murine macrophage; Spider biofilm repressed
A0A1D8PK30	8	2	3	11	17	10	2	#N/A	3	#N/A	#N/A	3	C3_04960W_A	RPL35	Ribosomal protein; downregulation correlates with clinical development of fluconazole resistance; colony morphology-related gene regulation by Ssn6; Hap43-induced; Spider biofilm repressed
A0A1D8PK40	18	8	8	19	22	17	#N/A	#N/A	3	1	#N/A	1	C3_04500C_A	RPL19A	Ribosomal protein L19; repressed upon phagocytosis by murine macrophages; Hap43-induced gene; Spider biofilm repressed
A0A1D8PK43	5	3	3	6	7	6	#N/A	#N/A	1	#N/A	#N/A	1	C3_05100C_A	RPL18	Predicted ribosomal protein; Plc1p-regulated, Tbf1-activated; repressed upon phagocytosis by murine macrophage; Hap43p-induced; Spider biofilm repressed
A0A1D8PK61	9	2	3	11	19	9	#N/A	#N/A	3	#N/A	#N/A	1	C3_05200W_A	RPS19A	Putative ribosomal protein S19; protein level decreases in stationary phase cultures; Spider biofilm repressed
A0A1D8PK65	#N/A	#N/A	#N/A	1	5	#N/A	#N/A	#N/A	#N/A	#N/A	#N/A	#N/A	C3_04830C_A	FAS2	Alpha subunit of fatty-acid synthase; required for virulence in mouse systemic infection and rat oropharyngeal infection models; regulated by Efg1; fluconazole-induced; amphotericin B repressed; flow model and Spider biofilm repressed
A0A1D8PK71	4	#N/A	#N/A	4	6	2	#N/A	#N/A	#N/A	#N/A	#N/A	#N/A	C3_04810C_A	C3_04810C_A	Protein of unknown function; transcript upregulated in an RHE model of oral candidiasis; rat catheter and Spider biofilm repressed
A0A1D8PKC3	#N/A	#N/A	#N/A	#N/A	5	#N/A	#N/A	#N/A	#N/A	#N/A	#N/A	#N/A	C3_06010W_A	CAM1	Putative translation elongation factor eEF1 gamma; protein level decreased in stationary phase cultures; Spider biofilm repressed
A0A1D8PKD0	#N/A	#N/A	#N/A	#N/A	1	#N/A	#N/A	#N/A	#N/A	#N/A	#N/A	#N/A	C3_05880C_A	C3_05880C_A	Ortholog(s) have mRNA binding, poly(U) RNA binding activity and role in nuclear-transcribed mRNA catabolic process, nonsense-mediated decay, regulation of mRNA stability, stress granule assembly
A0A1D8PKD1	4	3	2	6	10	6	#N/A	#N/A	2	#N/A	#N/A	2	C3_05710W_A	RCT1	Fluconazole-induced protein; Ras1, Cyr1 repressed and Efg1 induced; regulated by Nrg1, Tup1, Tbf1, Ssn6; induced in oralpharyngeal candidasis; rat catheter biofilm repressed
A0A1D8PKD3	#N/A	#N/A	#N/A	#N/A	1	#N/A	#N/A	#N/A	#N/A	#N/A	#N/A	#N/A	C3_06030W_A	NOG1	Putative GTPase; mutation confers hypersensitivity to 5-fluorocytosine (5-FC), 5-fluorouracil (5-FU), and tubercidin (7-deazaadenosine); repressed by prostaglandins; Hap43-induced
A0A1D8PKH2	#N/A	#N/A	#N/A	#N/A	#N/A	#N/A	#N/A	#N/A	#N/A	#N/A	#N/A	12	C3_06450W_A	GLG2	Putative self-glucosylating initiator of glycogen synthesis; expression regulated upon white-opaque switch; hypha-induced; Spider biofilm induced
A0A1D8PKU3	#N/A	#N/A	#N/A	#N/A	3	#N/A	#N/A	#N/A	#N/A	#N/A	#N/A	#N/A	C3_07580W_A	C3_07580W_A	Ortholog of C. dubliniensis CD36 : Cd36_87460, C. parapsilosis CDC317 : CPAR2_808260, C. auris B8441 : B9J08_001750 and Debaryomyces hansenii CBS767 : DEHA2F07084g
A0A1D8PKX3	#N/A	#N/A	#N/A	#N/A	#N/A	#N/A	1	#N/A	2	1	1	2	C4_00020W_A	VMA6	Putative vacuolar H+-ATPase subunit; required for proper vacuolar ATPase assembly and vacuolar functions; Spider biofilm repressed
A0A1D8PKZ9	7	6	2	8	13	11	#N/A	#N/A	#N/A	#N/A	#N/A	#N/A	C4_00270W_A	ATP2	F1 beta subunit of F1F0 ATPase complex; antigenic in human, mice; induced by ciclopirox olamine; caspofungin repressed; macrophage/pseudohyphal-induced; detected during exponential and stationary growth phases; Spider biofilm repressed
A0A1D8PL01	#N/A	1	#N/A	1	#N/A	#N/A	#N/A	#N/A	#N/A	#N/A	#N/A	#N/A	C4_00280W_A	STE24	Prenyl-dependent protease
A0A1D8PL02	#N/A	#N/A	#N/A	#N/A	6	2	#N/A	#N/A	#N/A	#N/A	#N/A	#N/A	C4_00330C_A	C4_00330C_A	Ortholog(s) have proton-transporting ATP synthase activity, rotational mechanism, structural molecule activity and role in ATP synthesis coupled proton transport, cristae formation, protein complex oligomerization
A0A1D8PL68	2	2	1	5	4	3	#N/A	#N/A	1	#N/A	#N/A	1	C4_01050C_A	RPL40B	Protein with similarity to the ribosomal protein portion of S. cerevisiae Rpl40Bp; colony morphology-related gene regulation by Ssn6; positively regulated by Tbf1; Spider biofilm repressed
A0A1D8PL78	#N/A	#N/A	#N/A	5	13	2	#N/A	#N/A	#N/A	#N/A	#N/A	#N/A	C4_01160W_A	CRD2	Metallothionein; for adaptation to growth in high copper; basal transcription is cadmium-repressed; Ssn6 regulated; complements copper sensitivity of an S. cerevisiae cup1 mutant; regulated by Sef1, Sfu1, and Hap43; Spider biofilm induced
A0A1D8PL99	14	6	5	16	24	17	#N/A	#N/A	2	#N/A	#N/A	#N/A	C4_01270W_A	RPS6A	Ribosomal protein 6A; localizes to cell surface of yeast cells but not hyphae; repressed upon phagocytosis by murine macrophage; possibly essential; Hap43-induced; Spider biofilm repressed
A0A1D8PLC3	1	#N/A	#N/A	#N/A	#N/A	#N/A	#N/A	#N/A	#N/A	#N/A	#N/A	#N/A	C4_01730C_A	C4_01730C_A	Ortholog(s) have P-body localization
A0A1D8PLC9	8	5	2	10	16	9	2	#N/A	4	#N/A	#N/A	1	C4_01520C_A	RPL20B	Ribosomal protein L20; repressed upon phagocytosis by murine macrophage; alternatively spliced intron in 5' UTR; Hap43-induced; Spider biofilm repressed
A0A1D8PLR3	#N/A	#N/A	#N/A	#N/A	#N/A	#N/A	#N/A	#N/A	#N/A	4	#N/A	#N/A	C4_03080W_A	C4_03080W_A	Protein of unknown function; flow model biofilm repressed
A0A1D8PLU5	#N/A	1	#N/A	#N/A	1	1	#N/A	#N/A	#N/A	#N/A	#N/A	#N/A	C4_03390W_A	CSH3	Functional homolog of S. cerevisiae Shr3p, which is a chaperone specific for amino acid permeases; localized to ER; required for wild-type amino-acid responsive hyphal growth and for mouse systemic virulence; regulated by Gcn2p and Gcn4p
A0A1D8PLU9	#N/A	#N/A	#N/A	#N/A	#N/A	1	#N/A	#N/A	#N/A	#N/A	#N/A	#N/A	C4_03560W_A	C4_03560W_A	Phosphorylated protein of unknown function; Hap43p-repressed gene
A0A1D8PLX3	#N/A	#N/A	#N/A	#N/A	#N/A	#N/A	1	#N/A	#N/A	#N/A	#N/A	1	C4_03780C_A	C4_03780C_A	Putative mitochondrial membrane protein; homozygous transposon insertion causes decreased colony wrinkling under filamentous growth-inducing conditions, but does not block true hyphal formation in liquid media
A0A1D8PLZ2	#N/A	#N/A	#N/A	#N/A	4	#N/A	#N/A	#N/A	#N/A	#N/A	#N/A	#N/A	C4_03960W_A	C4_03960W_A	Protein of unknown function; ORF added to Assembly 21 based on comparative genome analysis; protein detected by mass spec in stationary phase cultures
A0A1D8PM29	#N/A	#N/A	#N/A	#N/A	#N/A	#N/A	#N/A	#N/A	0	#N/A	#N/A	#N/A	C4_04290W_A	SEC15	Exocyst subunit, involved in polarized growth; cellular bud tip-associated protein; interacts with Ras-related GTPase Rsr1p; ortholog of S. cerevisiae SEC15
A0A1D8PM35	1	#N/A	#N/A	#N/A	1	#N/A	#N/A	#N/A	#N/A	#N/A	#N/A	#N/A	C4_04480C_A	EFB1	Translation elongation factor EF-1 beta; repressed by human whole blood or PMNs; macrophage/pseudohyphal-induced; antigenic in mouse; farnesol-downregulated; snoRNA snR18 is encoded within the EFB1 intron; Spider biofilm repressed
A0A1D8PM53	1	2	1	1	4	6	#N/A	#N/A	#N/A	#N/A	#N/A	#N/A	C4_04800W_A	C4_04800W_A	Ortholog(s) have role in ER-dependent peroxisome organization, endoplasmic reticulum inheritance, endoplasmic reticulum tubular network maintenance and endoplasmic reticulum tubular network organization, more
A0A1D8PM60	#N/A	#N/A	#N/A	#N/A	1	1	#N/A	#N/A	#N/A	#N/A	#N/A	#N/A	C4_04870C_A	C4_04870C_A	Ortholog(s) have RNA binding, chromatin binding, mRNA binding activity
A0A1D8PM75	#N/A	#N/A	#N/A	2	1	#N/A	#N/A	#N/A	#N/A	#N/A	#N/A	#N/A	C4_04900W_A	RPL30	Ribosomal 60S subunit protein; pre-rRNA processing; pre-mRNA alternatively spliced to productive/unproductive transcripts; temp-regulated splicing; colony morphology-related regulation by Ssn6, Tup1, Nrg1 regulated; Spider biofilm repressed
A0A1D8PM77	#N/A	#N/A	#N/A	#N/A	#N/A	#N/A	#N/A	#N/A	#N/A	#N/A	2	#N/A	C4_05010W_A	C4_05010W_A	Protein with a predicted role in ribosome biogenesis; mutation confers hypersensitivity to 5-fluorocytosine (5-FC), 5-fluorouracil (5-FU); repressed in core stress response; repressed by prostaglandins; Hap43-induced
A0A1D8PM93	2	#N/A	1	#N/A	#N/A	#N/A	2	#N/A	#N/A	#N/A	1	#N/A	C4_05190C_A	EDC3	Protein with mRNA binding activity, involved in regulation of activity of putative metacaspase Mca1p
A0A1D8PMA4	1	1	#N/A	1	1	2	2	#N/A	2	2	1	1	C4_05310W_A	C4_05310W_A	Ortholog of S. cerevisiae : MRX12, C. glabrata CBS138 : CAGL0J11110g, C. dubliniensis CD36 : Cd36_44970, C. parapsilosis CDC317 : CPAR2_500860 and C. auris B8441 : B9J08_003204
A0A1D8PMA5	#N/A	#N/A	#N/A	#N/A	1	#N/A	#N/A	#N/A	#N/A	#N/A	#N/A	#N/A	C4_05370W_A	PUF3	RNA-binding protein involved in regulation of mitochondrial biogenesis
A0A1D8PMC3	2	#N/A	#N/A	1	#N/A	#N/A	#N/A	#N/A	#N/A	#N/A	#N/A	#N/A	C4_05400C_A	C4_05400C_A	D-arabinose 5-phosphate isomerase; has GutQ domain which is associated with phosphosugar binding; other biofilm induced; rat catheter and Spider biofilm induced; F-12/CO2 early biofilm induced
A0A1D8PME8	2	#N/A	#N/A	#N/A	#N/A	#N/A	#N/A	#N/A	#N/A	#N/A	#N/A	#N/A	C4_05790W_A	C4_05790W_A	Ortholog(s) have Rab guanyl-nucleotide exchange factor activity
A0A1D8PMF8	#N/A	#N/A	#N/A	#N/A	5	#N/A	#N/A	#N/A	#N/A	#N/A	#N/A	#N/A	C4_06030W_A	CMD1	Calmodulin; calmodulin inhibitors cause a defect in hyphal growth; transcript not regulated by yeast-hyphal transition; mutation confers hypersensitivity to cytochalasin D and high concentrations of tunicamycin; gene has intron
A0A1D8PMK4	3	1	#N/A	1	3	3	#N/A	#N/A	#N/A	#N/A	#N/A	#N/A	C4_06470W_A	C4_06470W_A	Ortholog in S. cerevisiae is localizedto the bud, mating projection tip, and associates with ribosomes; Spider biofilm induced
A0A1D8PMR4	3	#N/A	#N/A	1	1	1	#N/A	#N/A	#N/A	#N/A	#N/A	#N/A	C4_07080C_A	C4_07080C_A	Protein with t-SNARE domains and a microtubule associated domain; Hap43-induced gene; repressed by alpha pheromone in SpiderM medium
A0A1D8PMU4	#N/A	#N/A	#N/A	1	#N/A	#N/A	#N/A	#N/A	#N/A	#N/A	#N/A	#N/A	C5_00090C_A	C5_00090C_A	Predicted ORF from Assembly 19; removed from Assembly 20; subsequently reinstated in Assembly 21 based on comparative genome analysis
A0A1D8PMW6	#N/A	#N/A	#N/A	#N/A	3	#N/A	#N/A	#N/A	#N/A	#N/A	#N/A	#N/A	C5_00370W_A	COF1	Putative cofilin; macrophage-induced protein; protein present in exponential and stationary-phase yeast cells, but higher amounts in stationary phase
A0A1D8PN45	#N/A	1	#N/A	#N/A	1	#N/A	#N/A	#N/A	#N/A	#N/A	#N/A	#N/A	C5_01210W_A	VPS1	Dynamin-family GTPase-related protein; induced upon adherence to polystyrene; regulated by Gcn2p and Gcn4p
A0A1D8PN49	1	1	#N/A	1	2	#N/A	#N/A	#N/A	#N/A	#N/A	#N/A	#N/A	C5_01050C_A	C5_01050C_A	Ortholog(s) have structural constituent of ribosome activity and mitochondrial large ribosomal subunit localization
A0A1D8PN63	#N/A	#N/A	#N/A	#N/A	#N/A	#N/A	#N/A	#N/A	#N/A	2	#N/A	#N/A	C5_01490C_A	C5_01490C_A	Predicted protein kinase; clade-associated gene expression
A0A1D8PN83	11	2	3	10	16	11	2	#N/A	2	2	1	2	C5_01540W_A	C5_01540W_A	Protein component of the small (40S) ribosomal subunit; Spider biofilm repressed
A0A1D8PNC0	#N/A	#N/A	#N/A	#N/A	#N/A	#N/A	16	#N/A	18	15	14	17	C5_02150C_A	ORC4	Phosphorylated protein similar to S. cerevisiae Orc4, subunit of the origin recognition complex (ORC); induced by alpha pheromone in SpiderM medium
A0A1D8PNC7	3	#N/A	#N/A	5	6	4	#N/A	#N/A	3	#N/A	#N/A	#N/A	C5_02080C_A	HSP12	Heat-shock protein; induced by osmotic/oxidative/cadmium stress, fluphenazine treatment, low iron, CDR1 and CDR2 overexpression, or ssn6 or ssk1 null mutation; overexpression increases resistance to farnesol and azoles
A0A1D8PNK0	#N/A	#N/A	#N/A	#N/A	#N/A	#N/A	#N/A	#N/A	#N/A	#N/A	#N/A	1	C5_02970W_A	DAP2	Putative dipeptidyl aminopeptidase; transcriptionally regulated during macrophage response
A0A1D8PNQ6	6	1	2	6	9	8	#N/A	#N/A	#N/A	#N/A	#N/A	#N/A	C5_03540C_A	RPS25B	Ribosomal protein; macrophage/pseudohyphal-induced after 16 h; repressed upon phagocytosis by murine macrophage; transcript positively regulated by Tbf1; 5'-UTR intron; Hap43-induced; Spider biofilm repressed
A0A1D8PNS0	#N/A	#N/A	#N/A	#N/A	1	#N/A	#N/A	#N/A	#N/A	#N/A	#N/A	#N/A	C5_03790W_A	GUK1	Putative guanylate kinase; identified in extracts from biofilm and planktonic cells; protein level decrease in stationary phase cultures; Hap43p-induced gene
A0A1D8PNS2	#N/A	#N/A	#N/A	#N/A	1	#N/A	#N/A	#N/A	#N/A	#N/A	#N/A	#N/A	C5_03730W_A	C5_03730W_A	Protein of unknown function; induced by alpha pheromone in SpiderM medium; Spider biofilm induced
A0A1D8PP14	2	#N/A	1	7	12	7	#N/A	#N/A	#N/A	#N/A	#N/A	#N/A	C5_04590C_A	RPL43A	Putative ribosomal protein, large subunit; repressed by human whole blood or PMNs; colony morphology-related gene regulation by Ssn6; Spider biofilm repressed
A0A1D8PP43	2	#N/A	#N/A	8	18	3	#N/A	#N/A	1	#N/A	#N/A	#N/A	C5_05050W_A	ADH1	Alcohol dehydrogenase; oxidizes ethanol to acetaldehyde; at yeast cell surface; immunogenic in humans/mice; complements S. cerevisiae adh1 adh2 adh3 mutant; fluconazole, farnesol-induced; flow model biofilm induced; Spider biofilm repressed
A0A1D8PP59	#N/A	#N/A	#N/A	3	7	4	#N/A	#N/A	#N/A	#N/A	#N/A	#N/A	C5_05230C_A	C5_05230C_A	Putative ubiquinol-cytochrome-c reductase; amphotericin B induced; repressed by nitric oxide; protein level decreases in stationary phase cultures; Hap43-repressed; Spider biofilm repressed
A0A1D8PPB2	1	#N/A	#N/A	1	2	2	#N/A	#N/A	#N/A	#N/A	#N/A	#N/A	C6_00200C_A	C6_00200C_A	Protein of unknown function; induced in high iron; possibly subject to Kex2 processing; Hap43-repressed
A0A1D8PPE0	3	1	2	4	5	4	1	#N/A	2	1	#N/A	1	C6_00650C_A	RPS13	Putative ribosomal protein of the small subunit
A0A1D8PPH3	#N/A	#N/A	#N/A	#N/A	#N/A	#N/A	1	#N/A	1	#N/A	1	#N/A	C6_00910C_A	C6_00910C_A	Protein with a predicted thioredoxin-like domain; Hap43-repressed; induced by prostaglandins
A0A1D8PPH7	#N/A	#N/A	#N/A	#N/A	#N/A	#N/A	#N/A	#N/A	2	#N/A	#N/A	#N/A	C6_00890W_A	C6_00890W_A	Ortholog of C. dubliniensis CD36 : Cd36_60900, C. parapsilosis CDC317 : CPAR2_603130, C. auris B8441 : B9J08_003439 and Candida tenuis NRRL Y-1498 : CANTEDRAFT_125757
A0A1D8PPJ1	#N/A	#N/A	#N/A	#N/A	2	#N/A	#N/A	#N/A	#N/A	#N/A	#N/A	#N/A	C6_01170W_A	CIC1	Putative proteasome-interacting protein; rat catheter biofilm induced
A0A1D8PPK2	2	#N/A	#N/A	1	2	1	#N/A	#N/A	#N/A	#N/A	#N/A	#N/A	C6_01210W_A	C6_01210W_A	Ortholog of S. cerevisiae : YPR063C, C. glabrata CBS138 : CAGL0D01540g, C. dubliniensis CD36 : Cd36_61340, C. parapsilosis CDC317 : CPAR2_602790 and C. auris B8441 : B9J08_005400
A0A1D8PPN6	10	2	2	11	16	12	#N/A	#N/A	#N/A	#N/A	#N/A	#N/A	C6_01700W_A	RPL32	Component of the large (60S) ribosomal subunit; Spider biofilm repressed
A0A1D8PPP3	#N/A	#N/A	#N/A	#N/A	1	#N/A	#N/A	#N/A	#N/A	#N/A	#N/A	#N/A	C6_01680C_A	C6_01680C_A	Has domain(s) with predicted hydrolase activity, acting on carbon-nitrogen (but not peptide) bonds, in linear amidines, metal ion binding activity
A0A1D8PPQ1	#N/A	#N/A	#N/A	#N/A	3	#N/A	#N/A	#N/A	#N/A	#N/A	#N/A	#N/A	C6_01630W_A	TIF3	Putative translation initiation factor; genes encoding ribosomal subunits, translation factors, and tRNA synthetases are downregulated upon phagocytosis by murine macrophage
A0A1D8PPS1	6	3	5	7	11	8	#N/A	#N/A	1	#N/A	#N/A	#N/A	C6_01970C_A	RPL25	Putative rRNA-binding ribosomal protein component of the 60S ribosomal subunit; Hap43-induced; colony morphology-related gene regulation by Ssn6
A0A1D8PPS6	#N/A	#N/A	#N/A	#N/A	#N/A	#N/A	53	#N/A	51	53	55	57	C6_02090C_A	C6_02090C_A	S. cerevisiae ortholog Pxl1 localizes to sites of polarized growth and is required for selection and/or maintenance of polarized growth sites; Hog1p-repressed
A0A1D8PPS8	#N/A	#N/A	#N/A	#N/A	#N/A	#N/A	#N/A	#N/A	#N/A	#N/A	2	#N/A	C6_02140W_A	C6_02140W_A	Has domain(s) with predicted role in signal transduction and intracellular localization
A0A1D8PPT5	7	3	3	7	19	10	#N/A	#N/A	#N/A	#N/A	#N/A	#N/A	C6_02070C_A	RPL23A	Ribosomal protein; downregulated upon phagocytosis by murine macrophage; Hap43-induced; sumoylation target; Spider biofilm repressed
A0A1D8PPV5	#N/A	#N/A	#N/A	#N/A	#N/A	#N/A	#N/A	#N/A	#N/A	#N/A	#N/A	6	C6_02260C_A	SEC27	Ortholog(s) have ubiquitin binding activity
A0A1D8PPV6	#N/A	#N/A	#N/A	2	5	#N/A	#N/A	#N/A	#N/A	#N/A	#N/A	#N/A	C6_02330W_A	C6_02330W_A	Described as a Gag-related protein; hyphal induced; downregulation correlates with clinical development of fluconazole resistance; repressed by nitric oxide, 17-beta-estradiol, ethynyl estradiol
A0A1D8PPZ0	#N/A	#N/A	#N/A	#N/A	3	#N/A	#N/A	#N/A	#N/A	#N/A	#N/A	#N/A	C6_02740W_A	C6_02740W_A	Protein of unknown function; Hap43-repressed gene
A0A1D8PQ38	8	4	4	9	10	10	1	#N/A	2	1	1	1	C6_03130W_A	C6_03130W_A	Has domain(s) with predicted proton-transporting ATP synthase activity, rotational mechanism, proton-transporting ATPase activity, rotational mechanism activity and role in ATP synthesis coupled proton transport
A0A1D8PQ49	#N/A	#N/A	#N/A	#N/A	#N/A	#N/A	#N/A	#N/A	#N/A	#N/A	1	#N/A	C6_03310W_A	C6_03310W_A	Protein of unknown function; induced by alpha pheromone in SpiderM medium; Spider biofilm induced
A0A1D8PQ82	#N/A	#N/A	#N/A	#N/A	2	2	#N/A	#N/A	#N/A	#N/A	#N/A	#N/A	C6_03640W_A	NOG2	Putative nucleolar GTPase; repressed by prostaglandins; Hap43-induced, rat catheter and Spider biofilm induced
A0A1D8PQC8	#N/A	#N/A	#N/A	#N/A	2	#N/A	#N/A	#N/A	#N/A	#N/A	#N/A	#N/A	C6_04290W_A	C6_04290W_A	Ortholog(s) have role in protein deubiquitination, regulation of ER to Golgi vesicle-mediated transport, regulation of retrograde vesicle-mediated transport, Golgi to ER, ribophagy
A0A1D8PQD5	10	5	4	11	16	12	#N/A	#N/A	1	#N/A	#N/A	#N/A	C6_04250W_A	C6_04250W_A	Ortholog(s) have cytochrome-c oxidase activity, role in mitochondrial respiratory chain complex IV assembly and mitochondrial intermembrane space, mitochondrial respiratory chain complex IV localization
A0A1D8PQH1	#N/A	1	#N/A	#N/A	1	1	#N/A	#N/A	#N/A	#N/A	#N/A	#N/A	C7_00070C_A	C7_00070C_A	Protein of unknown function; transcript induced in RHE model of oral candidiasis; Spider biofilm repressed
A0A1D8PQJ1	#N/A	#N/A	#N/A	#N/A	1	#N/A	#N/A	#N/A	#N/A	#N/A	#N/A	#N/A	C7_00250C_A	C7_00250C_A	Putative cytoplasmic RNA-binding protein; heterozygous null mutant exhibits hypersensitivity to parnafungin and cordycepin in C. albicans fitness test; Spider biofilm repressed
A0A1D8PQJ8	#N/A	1	#N/A	#N/A	1	1	#N/A	#N/A	#N/A	#N/A	#N/A	#N/A	C7_00350C_A	C7_00350C_A	Protein of unknown function; induced in core stress response; induced by cadmium stress via Hog1; oxidative stress-induced via Cap1; induced by Mnl1 under weak acid stress; macrophage-repressed; rat catheter and Spider biofilm induced
A0A1D8PQK6	#N/A	#N/A	#N/A	#N/A	#N/A	#N/A	#N/A	#N/A	#N/A	#N/A	#N/A	1	C7_00320C_A	PMR1	Secretory pathway P-type Ca2+/Mn2+-ATPase; calcium pump involved in control of calcium homeostasis; required for protein glycosylation and cell wall maintenance; required for hyphal tip oscillation in semisolid substrate
A0A1D8PQN0	3	1	1	3	7	5	#N/A	#N/A	#N/A	#N/A	#N/A	#N/A	C7_00710W_A	RPS28B	Putative ribosomal protein S28B
A0A1D8PQN3	#N/A	#N/A	#N/A	#N/A	12	#N/A	#N/A	#N/A	#N/A	#N/A	#N/A	#N/A	C7_00750W_A	ACB1	Protein similar to a region of acyl-coenzyme-A-binding protein; amphotericin B repressed; regulated by Nrg1, Tup1; Hap43-induced
A0A1D8PQQ5	10	3	4	11	11	11	#N/A	#N/A	#N/A	#N/A	#N/A	#N/A	C7_00960W_A	RPS18	Predicted ribosomal protein; repressed upon phagocytosis by murine macrophage; repressed by nitric oxide; Hap43-induced; Spider biofilm repressed
A0A1D8PQS0	#N/A	#N/A	#N/A	2	5	2	#N/A	#N/A	#N/A	#N/A	#N/A	#N/A	C7_00990W_A	RPP0	Putative ribosomal protein; antigenic in mouse; repressed upon phagocytosis by murine macrophage; induced by Tbf1; overlaps orf19.7014; Spider biofilm repressed
A0A1D8PQU3	#N/A	#N/A	#N/A	#N/A	4	#N/A	#N/A	#N/A	#N/A	#N/A	#N/A	#N/A	C7_01160C_A	C7_01160C_A	Ortholog of C. dubliniensis CD36 : Cd36_71020, C. parapsilosis CDC317 : CPAR2_300360, C. auris B8441 : B9J08_000715 and Candida tenuis NRRL Y-1498 : CANTEDRAFT_105022
A0A1D8PQV7	#N/A	#N/A	#N/A	#N/A	2	#N/A	#N/A	#N/A	#N/A	#N/A	#N/A	#N/A	C7_01610W_A	C7_01610W_A	Ortholog(s) have role in mitochondrial respiratory chain complex IV assembly, negative regulation of mitochondrial translation and integral component of mitochondrial inner membrane, mitochondrial inner membrane localization
A0A1D8PQW4	#N/A	#N/A	#N/A	#N/A	#N/A	1	#N/A	#N/A	#N/A	#N/A	#N/A	#N/A	C7_01710W_A	C7_01710W_A	Membrane-localized protein of unknown function; possibly secreted; fluconazole-induced
A0A1D8PR93	#N/A	#N/A	#N/A	8	10	2	#N/A	#N/A	1	#N/A	#N/A	#N/A	C7_03180C_A	HHO1	Putative histone H1; farnesol regulated; Hap43-induced; contains 5' UTR intron; Spider biofilm repressed
A0A1D8PR99	#N/A	#N/A	#N/A	1	#N/A	#N/A	#N/A	#N/A	#N/A	#N/A	#N/A	#N/A	C7_03250C_A	PDI1	Putative protein disulfide-isomerase; antigenic in human infection; soluble protein in hyphae; induced by filamentous growth; protein present in exponential and stationary growth phase yeast cultures; flow model biofilm repressed
A0A1D8PRA6	1	#N/A	#N/A	2	4	3	#N/A	#N/A	#N/A	#N/A	#N/A	#N/A	C7_03270W_A	C7_03270W_A	Putative adhesin-like protein
A0A1D8PRG7	#N/A	#N/A	#N/A	#N/A	2	1	#N/A	#N/A	#N/A	#N/A	#N/A	#N/A	C7_03890C_A	C7_03890C_A	Specificity factor required for ubiquitination; role in protein targeting to vacuole; involved in ubiquitin-dependent protein catabolism via the multivesicular body sorting pathway; Spider biofilm induced
A0A1D8PRJ6	#N/A	#N/A	#N/A	#N/A	1	#N/A	#N/A	#N/A	#N/A	#N/A	#N/A	#N/A	C7_04130C_A	SUI3	Putative translation initiation factor; genes encoding ribosomal subunits, translation factors, and tRNA synthetases are downregulated upon phagocytosis by murine macrophage
A0A1D8PRJ9	#N/A	#N/A	#N/A	#N/A	#N/A	#N/A	#N/A	#N/A	#N/A	2	#N/A	#N/A	C7_04180W_A	FAA2-3	Predicted acyl CoA synthetase
A0A1D8PRM5	4	2	1	5	5	7	#N/A	#N/A	#N/A	#N/A	#N/A	#N/A	CR_00250W_A	ATP17	Mitochondrial ATPase complex subunit; downregulated by Efg1p; flucytosine induced; caspofungin repressed
A0A1D8PRQ3	#N/A	#N/A	#N/A	#N/A	2	#N/A	#N/A	#N/A	#N/A	#N/A	#N/A	#N/A	CR_00580W_A	YRB1	Functional homolog of S. cerevisiae Yrb1p; regulates Gsp1 GTPase activity and thereby affects nucleocytoplasmic transport and cytoskeletal dynamics; transcript is not regulated by white-opaque switch or by dimorphic transition
A0A1D8PRQ6	#N/A	#N/A	#N/A	#N/A	#N/A	#N/A	#N/A	#N/A	2	#N/A	#N/A	#N/A	CR_00440C_A	LRG1	GTPase activator (GAP) that negatively controls small GTPases Cdc42p and Ras1p, involved in signaling pathway that controls morphogenesis in response to environmental signals
A0A1D8PRX9	#N/A	#N/A	#N/A	#N/A	1	1	#N/A	#N/A	#N/A	#N/A	#N/A	#N/A	CR_01300W_A	CR_01300W_A	Putative 12kDa subunit of mitochondrial NADH-ubiquinone oxidoreductase; gene has intron
A0A1D8PRY3	#N/A	#N/A	#N/A	#N/A	2	1	#N/A	#N/A	#N/A	#N/A	#N/A	#N/A	CR_01310W_A	ATP3	F1-ATP synthase complex subunit; caspofungin repressed; flucytosine and macrophage/pseudohyphal-induced; present in exponential and stationary growth phases; Hap43p-induced gene
A0A1D8PRY9	2	2	#N/A	2	2	4	#N/A	#N/A	#N/A	#N/A	#N/A	#N/A	CR_01490C_A	CR_01490C_A	Protein with a predicted role in protein translocation from the endoplasmic reticulum
A0A1D8PSC5	8	1	1	7	11	8	#N/A	#N/A	#N/A	#N/A	#N/A	#N/A	CR_03030C_A	RPL28	Putative ribosomal protein; Plc1-regulated; downregulated upon phagocytosis by murine macrophage; Spider biofilm repressed
A0A1D8PSC8	#N/A	#N/A	#N/A	#N/A	2	#N/A	#N/A	#N/A	#N/A	#N/A	#N/A	#N/A	CR_03060W_A	ARC1	Putative G4 nucleic acid binding protein; macrophage/pseudohyphal-repressed; protein enriched in stationary phase yeast-form cultures; Spider biofilm repressed
A0A1D8PSE1	#N/A	#N/A	#N/A	#N/A	5	#N/A	#N/A	#N/A	#N/A	#N/A	#N/A	#N/A	CR_03090C_A	MLC1	Microtubule-dependent localized protein; at Spitzenkorper and cytokinetic ring in hyphae; cell-cycle dependent localization to tip polarisome, bud neck in yeast and pseudohyphae; sumoylation target; rat catheter, Spider biofilm repressed
A0A1D8PSH3	#N/A	#N/A	#N/A	#N/A	5	#N/A	#N/A	#N/A	#N/A	#N/A	#N/A	#N/A	CR_03500W_A	CIT1	Citrate synthase; induced by phagocytosis; induced in high iron; Hog1-repressed; Efg1-regulated under yeast, not hyphal growth conditions; present in exponential and stationary phase; Spider biofilm repressed; rat catheter biofilm induced
A0A1D8PSK2	2	1	2	6	11	6	#N/A	#N/A	#N/A	#N/A	#N/A	#N/A	CR_03770C_A	RPS30	Putative 40S ribosomal protein S30; colony morphology-related gene regulation by Ssn6; rat catheter biofilm repressed
A0A1D8PSQ3	1	1	#N/A	#N/A	4	4	#N/A	#N/A	#N/A	#N/A	#N/A	#N/A	CR_04200W_A	YDJ1	Putative type I HSP40 co-chaperone; heavy metal (cadmium) stress-induced
A0A1D8PST9	#N/A	#N/A	#N/A	2	9	1	#N/A	#N/A	#N/A	#N/A	#N/A	#N/A	CR_04650W_A	CR_04650W_A	Protein involved in microtubule morphogenesis; required for protection from excess free beta-tubulin; possibly involved the beta-tubulin folding; Spider biofilm repressed
A0A1D8PSV5	3	1	#N/A	5	6	5	#N/A	#N/A	#N/A	#N/A	#N/A	#N/A	CR_04810W_A	RPS3	Ribosomal protein S3; Hog1, Hap43-induced; grepressed upon phagocytosis by murine macrophage; present in exponential and stationary phase cells; Spider biofilm repressed
A0A1D8PT02	1	1	1	1	3	2	#N/A	#N/A	#N/A	#N/A	#N/A	#N/A	CR_05390W_A	PST3	Flavodoxin-like protein involved in oxidative stress protection and virulence; YNB biofilm induced; stationary phase enriched protein; rat catheter and Spider biofilm repressed
A0A1D8PT80	#N/A	#N/A	#N/A	#N/A	1	#N/A	#N/A	#N/A	#N/A	#N/A	#N/A	#N/A	CR_06520C_A	CR_06520C_A	Ortholog(s) have GTPase activity
A0A1D8PTA8	5	#N/A	#N/A	6	5	4	#N/A	#N/A	#N/A	#N/A	#N/A	#N/A	CR_06780W_A	CR_06780W_A	Ortholog(s) have histone deacetylase activity
A0A1D8PTB5	#N/A	#N/A	#N/A	#N/A	7	#N/A	#N/A	#N/A	#N/A	#N/A	#N/A	#N/A	CR_06760C_A	LSC2	Putative succinate-CoA ligase beta subunit; regulated by Mig1, Tup1; induced in high iron; protein present in exponential and stationary growth phase yeast cells; Spider biofilm repressed
A0A1D8PTD1	#N/A	#N/A	#N/A	#N/A	5	3	#N/A	#N/A	#N/A	#N/A	#N/A	#N/A	CR_07050C_A	URA2	Putative bifunctional carbamoylphosphate synthetase-aspartate transcarbamylase; flucytosine induced; macrophage/pseudohyphal-induced; 5'-UTR intron; flow model biofilm repressed
A0A1D8PTF6	#N/A	#N/A	#N/A	#N/A	#N/A	2	2	#N/A	#N/A	2	#N/A	3	CR_07220C_A	CR_07220C_A	Homolog of nuclear distribution factor NudE, NUDEL; regulates dynein targeting to microtubule plus ends; flow model biofilm repressed
A0A1D8PTI7	8	2	2	8	11	9	#N/A	#N/A	#N/A	#N/A	#N/A	#N/A	CR_07630C_A	RPS27	Putative ribosomal protein; repressed upon phagocytosis by murine macrophage; Spider biofilm repressed
A0A1D8PTN4	6	#N/A	#N/A	6	7	8	#N/A	#N/A	#N/A	#N/A	#N/A	#N/A	CR_08020C_A	NOP10	Small nucleolar ribonucleoprotein; flucytosine induced
A0A1D8PTR4	11	4	4	12	14	13	#N/A	#N/A	1	#N/A	#N/A	#N/A	CR_08480C_A	CR_08480C_A	Ortholog(s) have structural constituent of ribosome activity and cytosolic small ribosomal subunit localization
A0A1D8PTS0	1	#N/A	#N/A	#N/A	2	#N/A	#N/A	#N/A	#N/A	#N/A	#N/A	#N/A	CR_08360C_A	RPP2A	Acidic ribosomal protein; likely role in translation elongation regulation; interacts with Rpp1B; 1 of 4 similar ribosomal proteins (Rpp1A, Rpp1B, Rpp2A, Rpp2B); CUG start codon; upstream uORFs; Tbf1-induced; Spider biofilm repressed
A0A1D8PTV4	#N/A	#N/A	#N/A	#N/A	1	#N/A	#N/A	#N/A	#N/A	#N/A	#N/A	#N/A	CR_09120C_A	TUB1	Alpha-tubulin; gene has intron; complements cold-sensitivity of S. cerevisiae tub1 mutant; C. albicans has single alpha-tubulin gene, whereas S. cerevisiae has two (TUB1, TUB3); farnesol-upregulated in biofilm; sumoylation target
A0A1D8PTX9	#N/A	#N/A	#N/A	#N/A	2	1	#N/A	#N/A	#N/A	#N/A	#N/A	#N/A	CR_09320C_A	PHO88	Protein with a role in phosphate transport; biofilm-regulated expression; amphotericin B repressed
A0A1D8PU03	#N/A	#N/A	#N/A	#N/A	#N/A	#N/A	#N/A	#N/A	1	#N/A	#N/A	#N/A	CR_09650W_A	WAL1	Protein required for hyphal growth and for wild-type cell morphology, polarized budding, endocytosis, vacuole morphology; similar to Wiskott-Aldrich syndrome protein; localizes to cortical actin patches and hyphal tips
A0A1D8PU05	#N/A	#N/A	#N/A	#N/A	2	#N/A	#N/A	#N/A	#N/A	#N/A	#N/A	#N/A	CR_09640C_A	CR_09640C_A	Ortholog(s) have role in cytoplasmic translation
A0A1D8PU11	#N/A	#N/A	#N/A	#N/A	#N/A	#N/A	#N/A	#N/A	#N/A	30	#N/A	#N/A	CR_09620C_A	CR_09620C_A	Ortholog(s) have phosphatidic acid transfer activity and role in cardiolipin metabolic process, phospholipid translocation, phospholipid transport, positive regulation of phosphatidylcholine biosynthetic process
A0A1D8PU26	#N/A	#N/A	#N/A	#N/A	2	3	#N/A	#N/A	#N/A	#N/A	#N/A	#N/A	CR_09810W_A	CR_09810W_A	Protein of unknown function; rat catheter biofilm repressed
A0A1D8PU46	#N/A	#N/A	#N/A	#N/A	6	5	#N/A	#N/A	#N/A	#N/A	#N/A	#N/A	CR_09950C_A	SIK1	Putative U3 snoRNP protein; Hap43p-induced gene; physically interacts with TAP-tagged Nop1p
A0A1D8PU69	1	#N/A	#N/A	2	4	2	#N/A	#N/A	#N/A	#N/A	#N/A	#N/A	CR_10350C_A	TRX1	Thioredoxin; involved in response to reactive oxygen species; biofilm, benomyl, flucytosine, peroxide, Hap43 induced; amphotericin B, caspofungin repressed; induced by human neutrophils; macrophage-repressed gene
A0A1D8PUC3	#N/A	#N/A	#N/A	#N/A	1	#N/A	#N/A	#N/A	#N/A	#N/A	#N/A	#N/A	CR_10750C_A	CR_10750C_A	Ortholog of S. cerevisiae : YCR087C-A, C. glabrata CBS138 : CAGL0E00517g, C. dubliniensis CD36 : Cd36_35524, C. parapsilosis CDC317 : CPAR2_200040 and C. auris B8441 : B9J08_001263
G1UB11	#N/A	#N/A	1	#N/A	1	1	#N/A	#N/A	#N/A	#N/A	#N/A	#N/A	C7_02840C_A	ERG5	Putative C-22 sterol desaturase; fungal C-22 sterol desaturases are cytochrome P450 enzymes of ergosterol biosynthesis, catalyze formation of the C-22(23) double bond in the sterol side chain; transposon mutation affects filamentous growth
G1UB63	4	2	4	2	4	4	#N/A	#N/A	2	#N/A	#N/A	#N/A	C7_00090C_A	CSA1	Surface antigen on elongating hyphae and buds; strain variation in repeat number; ciclopirox, filament induced, alkaline induced by Rim101; Efg1-, Cph1, Hap43-regulated; required for WT RPMI biofilm formation; Bcr1-induced in a/a biofilms
O13318	#N/A	#N/A	#N/A	2	3	#N/A	#N/A	#N/A	#N/A	#N/A	#N/A	#N/A	C1_00220W_A	PHR2	Glycosidase; role in vaginal not systemic infection (low pH not neutral); low pH, high iron, fluconazole, Hap43-induced; Rim101-repressed at pH8; rat catheter biofilm induced; Bcr1-repressed in RPMI a/a biofilms
O13426	2	#N/A	#N/A	3	2	1	#N/A	#N/A	1	#N/A	#N/A	#N/A	C6_03760C_A	SHM2	Cytoplasmic serine hydroxymethyltransferase; complements glycine auxotrophy of S. cerevisiae shm1 shm2 gly1-1 mutant; antigenic; farnesol-upregulated in biofilm; stationary-phase enriched protein; rat catheter and Spider biofilm repressed
O42766	#N/A	#N/A	#N/A	2	3	3	#N/A	#N/A	#N/A	1	#N/A	#N/A	C1_03220C_A	BMH1	Sole 14-3-3 protein in C. albicans; role in hyphal growth; possibly regulated by host interaction; localizes to yeast-form cell surface, not hyphae; alternatively spliced 5' UTR intron; Spider biofilm repressed
O42817	2	#N/A	#N/A	5	5	5	#N/A	#N/A	#N/A	#N/A	#N/A	#N/A	C3_05370C_A	YST1	Ribosome-associated protein; antigenic in mice; complements S. cerevisiae yst1 yst2 mutant; similar to laminin receptor; predicted S/T phosphorylation, N-glycosylation, myristoylation, Hap43-, Gcn4-regulated; Spider biofilm repressed
O43101	3	2	#N/A	7	10	7	#N/A	#N/A	#N/A	#N/A	#N/A	#N/A	C1_10620W_A	C1_10620W_A	Ortholog(s) have pseudouridine synthase activity
O59931	28	14	9	27	37	30	4	#N/A	5	#N/A	#N/A	3	C1_03020C_A	RPL13	Putative ribosomal subunit; antigenic during murine infection; downregulated upon phagocytosis by murine macrophage; Spider biofilm repressed
O74198	1	#N/A	#N/A	2	3	2	#N/A	#N/A	#N/A	#N/A	#N/A	#N/A	C3_02150C_A	ERG6	Delta(24)-sterol C-methyltransferase, converts zymosterol to fecosterol, ergosterol biosynthesis; mutation confers nystatin resistance; Hap43, GlcNAc-, fluconazole-induced; upregulated in azole-resistant strain; Spider biofilm repressed
O74261	#N/A	#N/A	#N/A	3	1	#N/A	#N/A	#N/A	#N/A	#N/A	#N/A	#N/A	CR_06490C_A	HSP60	Heat shock protein; soluble in hyphae; regulated by Nrg1 and by iron; induced in high iron; heavy metal (cadmium) stress-induced; sumoylation target; protein present in exponential and stationary phase cells; Hap43-repressed
O93827	#N/A	5	3	6	17	13	#N/A	#N/A	#N/A	#N/A	#N/A	#N/A	C3_07950C_A	SRB1	Essential GDP-mannose pyrophosphorylase; makes GDP-mannose for protein glycosylation; functional in S. cerevisiae psa1; on yeast-form, not hyphal cell surface; alkaline induced; induced on adherence to polystyrene; Spider biofilm repressed
O94030	#N/A	#N/A	#N/A	#N/A	1	#N/A	#N/A	#N/A	#N/A	#N/A	#N/A	#N/A	C1_02880C_A	MIA40	Predicted component of the mitochondrial intermembrane space import machinery; Hap43p-repressed gene
O94083	#N/A	#N/A	#N/A	1	5	#N/A	#N/A	#N/A	#N/A	#N/A	#N/A	#N/A	C6_01610W_A	ANB1	Translation initiation factor eIF-5A; repressed in hyphae vs yeast cells; downregulated upon phagocytosis by murine macrophage; Hap43-induced; GlcNAc-induced protein; Spider biofilm repressed
P0CB63	#N/A	#N/A	#N/A	#N/A	#N/A	1	#N/A	#N/A	#N/A	#N/A	#N/A	#N/A	C1_09750W_A	C1_09750W_A	GET complex subunit; expression downregulated in an ssr1 null mutant
P0CU34	0	#N/A	#N/A	0	0	#N/A	#N/A	#N/A	0	#N/A	#N/A	#N/A	C3_06330W_A	TSA1B	Putative peroxidase; orf19.7398.1 is contig-truncated fragment of gene identical to TSA1; Tsa1p and Tsa1Bp role under oxidative/reductive stress, hyphal cell wall formation; in hyphal nucleus, cell wall; yeast-form nucleus, cytoplasm
P0CU35	0	#N/A	#N/A	0	0	0	#N/A	#N/A	#N/A	#N/A	#N/A	#N/A	C1_03620C_A	C1_03620C_A	Ortholog of S. cerevisiae Rps22Ap and Rps22Bp; gene contains 5' UTR intron
P0CY35	0	0	0	0	0	0	0	#N/A	0	0	0	0	C2_08370C_A	TEF1	Translation elongation factor 1-alpha; at cell surface; binds human plasminogen; macrophage/pseudohyphal-induced; induced in RHE model of oral candidiasis, in clinical oral candidiasis isolates; possibly essential; Spider biofilm repressed
P10613	1	1	1	#N/A	2	4	#N/A	#N/A	#N/A	#N/A	#N/A	#N/A	C5_00660C_A	ERG11	Lanosterol 14-alpha-demethylase; cytochrome P450 family; role in ergosterol biosynthesis; target of azole antifungals; may contribute to drug resistance; azole or flow model biofilm induced; drug treated biofilm induced; hypoxia regulated
P22011	2	#N/A	#N/A	4	11	#N/A	#N/A	#N/A	#N/A	#N/A	#N/A	#N/A	C7_02380C_A	CYP1	Peptidyl-prolyl cis-trans isomerase; cyclosporin A sensitive activity; soluble in hyphae; biofilm induced, macrophage-induced protein; downregulated upon treatment of biofilm with farnesol; present in exponential and stationary phase cells
P25997	1	#N/A	#N/A	5	9	#N/A	#N/A	#N/A	#N/A	#N/A	#N/A	#N/A	C5_01580C_A	CEF3	Translation elongation factor 3; antigenic in humans; predicted C-term nucleotide-binding active site; protein on surface of yeast, not hyphae; polystyrene adherence induced; higher protein amount in stationary phase; possibly essential
P28870	#N/A	#N/A	#N/A	#N/A	15	#N/A	#N/A	#N/A	#N/A	#N/A	#N/A	#N/A	C7_02570C_A	RBP1	Peptidyl-prolyl cis-trans isomerase; rapamycin-binding protein; homozygous null mutation confers rapamycin resistance; regulated by Gcn4p; macrophage-induced protein; repressed in response to 3-AT; functional homolog of S. cerevisiae Rbp1p
P30575	2	1	#N/A	23	27	5	#N/A	#N/A	#N/A	#N/A	#N/A	1	C1_08500C_A	ENO1	Enolase, involved in glycolysis and gluconeogenesis; also has transglutaminase activity involved in assembly of cell wall polysaccharides; major cell-surface antigen; binds host plasmin/plasminogen; immunoprotective; may be essential
P40910	8	2	#N/A	11	17	13	#N/A	#N/A	#N/A	#N/A	#N/A	#N/A	C1_03090W_A	RPS1	Putative ribosomal protein 10 of the 40S subunit; elicits host antibody response during infection; transcript induced during active growth; Spider biofilm repressed
P40953	#N/A	#N/A	#N/A	1	#N/A	#N/A	#N/A	#N/A	#N/A	#N/A	#N/A	#N/A	C5_04130C_A	CHT2	GPI-linked chitinase; required for normal filamentous growth; repressed in core caspofungin response; fluconazole, Cyr1, Efg1, pH-regulated; mRNA binds She3 and is localized to yeast-form buds and hyphal tips; Spider biofilm repressed
P41797	#N/A	0	#N/A	1	1	#N/A	#N/A	#N/A	0	1	2	#N/A	C1_13480W_A	HSP70	Putative hsp70 chaperone; role in entry into host cells; heat-shock, amphotericin B, cadmium, ketoconazole-induced; surface localized in yeast and hyphae; antigenic in host; farnesol-downregulated in biofilm; Spider biofilm induced
P46273	6	#N/A	#N/A	29	22	#N/A	#N/A	#N/A	1	#N/A	#N/A	1	C6_00750C_A	PGK1	Phosphoglycerate kinase; localizes to cell wall and cytoplasm; antigenic in murine/human infection; flow model biofilm, Hog1-, Hap43-, GCN-induced; repressed upon phagocytosis; repressed in Spider biofilms by Bcr1, Ndt80, Rob1, Brg1
P46587	4	2	#N/A	14	23	10	#N/A	#N/A	1	#N/A	#N/A	#N/A	C1_04300C_A	SSA2	HSP70 family chaperone; cell wall fractions; antigenic; beta-defensin peptides impport; ATPase domain binds histatin 5; at hyphal surface, not yeast; farnesol-repressed in biofilm; flow model, Spider biofilm repressed; caspofungin repressed
P46592	#N/A	#N/A	1	#N/A	#N/A	#N/A	#N/A	#N/A	#N/A	#N/A	#N/A	#N/A	C3_01830C_A	MNT2	Alpha-1,2-mannosyl transferase; adds 3rd mannose in cell-wall mannoprotein biosynthesis; partially redundant with Mnt1; role in adherence and virulence; expressed in yeast and hyphae; fungal-specific; Hap43-induced; Spider biofilm induced
P46598	#N/A	#N/A	#N/A	5	12	6	#N/A	#N/A	1	2	1	#N/A	C7_02030W_A	HSP90	Essential chaperone, regulates several signal transduction pathways and temperature-induced morphogenesis; activated by heat shock, stress; localizes to surface of hyphae, not yeast cells; mediates echinocandin and biofilm azole resistance
P46614	1	#N/A	#N/A	9	9	4	#N/A	#N/A	3	#N/A	#N/A	1	C2_05460W_A	CDC19	Pyruvate kinase at yeast cell surface; Gcn4/Hog1/GlcNAc regulated; Hap43/polystyrene adherence induced; repressed by phagocytosis/farnesol; hyphal growth role; stationary phase enriched; flow model biofilm induced; Spider biofilm repressed
P48989	0	0	0	0	0	0	#N/A	#N/A	#N/A	0	#N/A	#N/A	C3_03900C_A	HTB1	Histone H2B; induced by adherence to polystyrene; amphotericin B, caspofungin repressed; flucytosine, fluconazole induced; Efg1 regulated; slow growth, increased white-to opaque switch in ectopic expression strains; Spider biofilm repressed
P53698	4	#N/A	#N/A	5	12	#N/A	#N/A	#N/A	#N/A	#N/A	#N/A	#N/A	C2_10110W_A	CYC1	Cytochrome c; complements defects of S. cerevisiae cyc1 cyc7 double mutant; induced in high iron; alkaline repressed; repressed by nitric oxide; Hap43-dependent repression in low iron; regulated by Sef1, Sfu1
P82610	#N/A	#N/A	#N/A	#N/A	1	#N/A	#N/A	#N/A	#N/A	#N/A	#N/A	#N/A	CR_01620C_A	MET6	Essential 5-methyltetrahydropteroyltriglutamate-homocysteine methyltransferase (cobalamin-independent methionine synthase); antigenic in murine/human systemic infection; heat shock, estrogen, GCN-induced; Spider biofilm repressed
P82611	#N/A	#N/A	#N/A	#N/A	4	#N/A	#N/A	#N/A	#N/A	#N/A	#N/A	#N/A	CR_08210C_A	ACO1	Aconitase; induced in high iron; 2 upstream CCAAT motifs; amino acid starvation (3-AT), amphotericin B, phagocytosis, farnesol induced; Hap43, fluconazole-repressed; Gcn4-regulated; antigenic in infection; flow and Spider biofilm repressed
P82612	6	#N/A	#N/A	9	10	#N/A	#N/A	#N/A	1	#N/A	#N/A	#N/A	C2_03270W_A	GPM1	Phosphoglycerate mutase; surface protein that binds host complement Factor H and FHL-1; antigenic; fluconazole, or amino acid starvation (3-AT) induced, farnesol-repressed; Hap43, flow model biofilm induced; Spider biofilm repressed
P83774	1	2	1	3	5	4	#N/A	#N/A	#N/A	#N/A	#N/A	#N/A	C7_01250W_A	ASC1	40S ribosomal subunit similar to G-beta subunits; glucose or N starvation induced filamentation; required for virulence in mice; snoRNA snR24 encoded in ASC1 intron; repressed in stationary phase; GlcNAc-induced; Spider biofilm repressed
P83776	#N/A	#N/A	#N/A	1	#N/A	1	#N/A	#N/A	#N/A	#N/A	#N/A	#N/A	CR_04510W_A	HXK2	Hexokinase II; antigenic in humans; repressed by human neutrophils; Efg1-regulated; fluconazole-induced; gene regulation by Ssn6; present in exponential and stationary growth phase; flow model biofilm induced; Spider biofilm repressed
P83777	#N/A	#N/A	#N/A	#N/A	1	#N/A	#N/A	#N/A	#N/A	#N/A	#N/A	#N/A	C2_08810C_A	IPP1	Putative inorganic pyrophosphatase; antigenic; soluble protein in hyphae; macrophage-induced protein; protein present in exponential and stationary phase yeast; possibly essential (UAU1 method); sumoylation target; Spider biofilm repressed
P83779	2	#N/A	#N/A	16	20	3	#N/A	#N/A	#N/A	#N/A	#N/A	#N/A	C4_06570C_A	PDC11	Pyruvate decarboxylase; antigenic; on hyphal not yeast cell surface; Hap43, Gcn4, Efg1, Efh1, Hsf1 regulated; fluconazole, farnesol induced; amino acid starvation repressed; flow model biofilm induced; Spider biofilm repressed
P83781	7	10	5	9	26	19	1	#N/A	#N/A	#N/A	#N/A	#N/A	C1_04100C_A	POR1	Mitochondrial outer membrane porin; in detergent-resistant membrane fraction (possible lipid raft component); antigenic in human, mouse; Hap43p-induced; flucytosine-, macrophage-, farnesol- induced; fluconazole, caspofungin repressed
P83782	1	1	1	#N/A	8	7	#N/A	#N/A	#N/A	#N/A	#N/A	#N/A	C5_03350W_A	QCR2	Ubiquinol-cytochrome-c reductase; antigenic; induced by interaction with macrophage; repressed by nitric oxide; in detergent-resistant membrane fraction (possible lipid raft component); levels decrease in stationary phase; Hap43p-repressed
P83784	#N/A	#N/A	#N/A	5	7	1	#N/A	#N/A	#N/A	#N/A	#N/A	#N/A	C2_07380W_A	SSC1	Heat shock protein; at yeast-form cell surface, not hyphae; antigenic; Gcn4-regulated; induced by amino acid starvation (3-AT) or by adherence to polystyrene; macrophage-repressed; sumoylation target; possibly essential
P87206	3	2	#N/A	4	15	9	#N/A	#N/A	#N/A	#N/A	#N/A	#N/A	C1_01350C_A	TIF	Translation initiation factor; upregulated in highly virulent strain compared to less virulent strain; antigenic in human; flucytosine induced; downregulated upon phagocytosis by macrophages; Spider biofilm repressed
Q00310	2	3	#N/A	3	3	3	#N/A	#N/A	#N/A	#N/A	#N/A	#N/A	C3_01810C_A	MNT1	Alpha-1,2-mannosyl transferase; predicted type II Golgi membrane protein; adds 2nd mannose during cell-wall mannoprotein biosynthesis; required for wild-type virulence and adherence to epithelial cells; Hap43-induced
Q59KF3	8	2	#N/A	10	9	9	#N/A	#N/A	#N/A	#N/A	#N/A	#N/A	C6_04160C_A	SPB1	Putative AdoMet-dependent methyltransferase; Hap43-induced; repressed by prostaglandins; possibly essential gene, disruptants not obtained by UAU1 method; Spider biofilm induced
Q59KV8	#N/A	#N/A	#N/A	2	4	1	#N/A	#N/A	#N/A	#N/A	#N/A	#N/A	C2_06730W_A	LSP1	Eisosome component with a predicted role in endocytosis; protein present in exponential and stationary growth phase yeast cultures; caspofungin repressed; biofilm induced; fungal-specific (no human/murine homolog); sumoylation target
Q59LS1	12	3	1	22	27	20	#N/A	#N/A	2	#N/A	#N/A	#N/A	C2_09430W_A	RPL3	Ribosomal protein, large subunit; induced by ciclopirox olamine treatment; genes encoding cytoplasmic ribosomal subunits are downregulated upon phagocytosis by murine macrophages; Hap43-induced gene; Spider biofilm repressed
Q59LZ5	#N/A	#N/A	#N/A	#N/A	1	#N/A	#N/A	#N/A	#N/A	#N/A	#N/A	#N/A	C7_02640W_A	TOM70	Ortholog(s) have mitochondrion targeting sequence binding, protein transmembrane transporter activity
Q59LZ9	#N/A	1	#N/A	#N/A	2	1	#N/A	#N/A	#N/A	#N/A	#N/A	#N/A	C7_02680W_A	TOM22	Putative mitochondrial import receptor subunit; colony morphology-related gene regulation by Ssn6
Q59M30	#N/A	#N/A	#N/A	#N/A	4	2	#N/A	#N/A	#N/A	#N/A	#N/A	#N/A	C1_12590W_A	ATP20	Putative mitochondrial ATP synthase; shows colony morphology-related gene regulation by Ssn6p; flucytosine induced; caspofungin repressed; macrophage/pseudohyphal-induced
Q59MN2	#N/A	#N/A	#N/A	#N/A	#N/A	#N/A	#N/A	#N/A	#N/A	#N/A	1	#N/A	C4_05140C_A	GDB1	Putative glycogen debranching enzyme; expression is regulated upon white-opaque switch; regulated by Nrg1, Tup1; rat catheter biofilm repressed
Q59MV9	#N/A	#N/A	#N/A	#N/A	#N/A	#N/A	#N/A	#N/A	#N/A	1	1	#N/A	CR_07790C_A	YHB1	Nitric oxide dioxygenase; acts in nitric oxide scavenging/detoxification; role in virulence in mouse; transcript activated by NO, macrophage interaction; Hap43, hypha repressed; mRNA binds She3
Q59P03	#N/A	#N/A	#N/A	#N/A	#N/A	1	#N/A	#N/A	#N/A	#N/A	#N/A	#N/A	C4_05450C_A	CBR1	Putative cytochrome B5 reductase; plasma membrane-localized
Q59P43	#N/A	#N/A	#N/A	#N/A	1	#N/A	#N/A	#N/A	#N/A	#N/A	#N/A	#N/A	C2_06310C_A	GSP1	Small RAN G-protein; essential; no prenylation predicted; can rescue S. cerevisiae gsp1 viability; macrophage/pseudohyphal-induced; transcript not regulated by white-opaque, yeast-hypha switching; GlcNAc-induced; Spider biofilm repressed
Q59P94	#N/A	#N/A	#N/A	#N/A	#N/A	#N/A	1	#N/A	#N/A	#N/A	#N/A	#N/A	C4_04260C_A	FZO1	Mitochondrial biogenesis protein; rat catheter and Spider biofilm induced
Q59PT0	#N/A	#N/A	#N/A	#N/A	2	2	#N/A	#N/A	#N/A	#N/A	#N/A	#N/A	CR_05780W_A	VMA2	Vacuolar H(+)-ATPase; protein present in exponential and stationary growth phase yeast cultures; plasma membrane localized; amphotericin B repressed, caspofungin repressed
Q59PV8	2	1	2	3	8	3	#N/A	#N/A	#N/A	#N/A	#N/A	#N/A	C1_07600W_A	ATP7	Putative subunit of the F1F0-ATPase complex; colony morphology-related gene regulation by Ssn6; farnesol, macrophage-downregulated protein abundance; protein present in exponential and stationary yeast growth phases; Hap43-induced
Q59Q46	#N/A	#N/A	#N/A	2	2	#N/A	#N/A	#N/A	#N/A	#N/A	#N/A	#N/A	C2_06390C_A	IMH3	Inosine monophosphate (IMP) dehydrogenase; enzyme of GMP biosynthesis; target of mycophenolic acid and mizoribine monophosphate; antigenic during infection; repressed in core stress response; snoRNA snR54 encoded within IMH3 intron
Q59QA9	#N/A	#N/A	#N/A	#N/A	#N/A	1	#N/A	#N/A	#N/A	#N/A	#N/A	#N/A	C1_08610C_A	C1_08610C_A	Ortholog of S. cerevisiae Aim38/Rcf2, cytochrome c oxidase subunit; plasma membrane localized; Hap43-repressed; induced in oralpharyngeal candidasis; flow model biofilm induced; Spider biofilm repressed
Q59QC5	#N/A	#N/A	#N/A	#N/A	#N/A	1	#N/A	#N/A	#N/A	#N/A	#N/A	#N/A	C1_08480C_A	APS3	Component of the adaptor complex AP-3, which is involved in vacuolar protein sorting
Q59QD6	26	16	5	61	82	46	3	#N/A	5	5	3	3	C1_08380W_A	TEF2	Translation elongation factor 1-alpha; genes encoding ribosomal subunits, translation factors, and tRNA synthetases are downregulated upon phagocytosis by murine macrophage
Q59QN7	#N/A	#N/A	#N/A	2	9	3	#N/A	#N/A	#N/A	#N/A	#N/A	#N/A	CR_05180C_A	SDH2	Succinate dehydrogenase, Fe-S subunit; localizes to surface of yeast cells, but not hyphae; induced in high iron and during log phase aerobic growth; repressed by nitric oxide, Hap43
Q59QT4	#N/A	#N/A	#N/A	#N/A	2	#N/A	#N/A	#N/A	#N/A	#N/A	#N/A	#N/A	C5_03410C_A	C5_03410C_A	Ortholog(s) have structural constituent of ribosome activity and mitochondrial large ribosomal subunit localization
Q59R09	#N/A	#N/A	#N/A	#N/A	1	#N/A	#N/A	#N/A	#N/A	#N/A	#N/A	#N/A	C6_04210C_A	ATM1	Member of MDR subfamily of ABC family; ortholog of S. cerevisiae ABC transporter, Atm1; induced in low iron; induced by nitric oxide independent of Yhb1
Q59R20	#N/A	#N/A	#N/A	1	1	1	#N/A	#N/A	#N/A	#N/A	#N/A	#N/A	C7_03660C_A	C7_03660C_A	Protein with similarity to amino acid-tRNA ligase; stationary phase enriched protein; GlcNAc-induced protein
Q59R24	#N/A	#N/A	#N/A	#N/A	5	1	#N/A	#N/A	#N/A	#N/A	#N/A	#N/A	C7_03630C_A	TIM9	Predicted protein of the mitochondrial intermembrane space; rat catheter biofilm induced; Spider biofilm repressed
Q59RL1	4	2	1	3	3	3	#N/A	#N/A	#N/A	#N/A	#N/A	#N/A	C6_00330C_A	GNP1	Similar to asparagine and glutamine permease; fluconazole, caspofungin induced; regulated by Nrg1, Mig1, Tup1, Gcn2, Gcn4, and alkaline regulated by Rim101; repressed during chlamydospore formation; rat catheter, flow model biofilm induced
Q59RP7	2	#N/A	#N/A	1	2	1	#N/A	#N/A	#N/A	#N/A	#N/A	#N/A	CR_07320C_A	CR_07320C_A	Ortholog of S. cerevisiae Mrpl4, a mitochondrial ribosomal protein of the large subunit; repressed by nitric oxide
Q59S06	2	1	#N/A	4	9	6	#N/A	#N/A	#N/A	#N/A	#N/A	#N/A	C6_00370C_A	NOP5	Ortholog of S. cerevisiae Nop58; involved in pre-rRNA process; Tn mutation affects filamentous growth; macrophage/pseudohyphal-induced; physically interacts with TAP-tagged Nop1; Spider biofilm repressed
Q59SF7	#N/A	#N/A	#N/A	#N/A	2	2	#N/A	#N/A	#N/A	#N/A	#N/A	#N/A	C2_08870C_A	PIR1	1,3-beta-glucan-linked cell wall protein; N-mannosylated, O-glycosylated by Pmt1; cell wall defect in het mutant; Hog1/fluconazole/hypoxia induced; iron/Efg1/Plc1/temp regulated; flow model biofilm induced; hyphal, Spider biofilm repressed
Q59SI1	#N/A	#N/A	#N/A	1	#N/A	#N/A	#N/A	#N/A	#N/A	#N/A	#N/A	#N/A	C4_00510C_A	RLP24	Putative ribosomal protein; Hap43-induced; essential gene; heterozygous mutation confers hypersensitivity to 5-fluorocytosine (5-FC), 5-fluorouracil (5-FU), and tubercidin (7-deazaadenosine); Spider biofilm induced
Q59SI5	#N/A	#N/A	#N/A	#N/A	#N/A	#N/A	#N/A	#N/A	#N/A	#N/A	#N/A	1	C4_00560C_A	MMM1	Subunit of ER-mitochondrion tether ERMES complex, required for evasion of host immune response
Q59SU5	4	#N/A	3	6	9	7	#N/A	#N/A	#N/A	#N/A	#N/A	#N/A	C3_03910W_A	HTA1	Histone H2A; repressed in fkh2 mutant; amphotericin B repressed; farnesol regulated; RNA abundance regulated by tyrosol and cell density; Hap43-induced gene; Spider biofilm repressed
Q59T30	#N/A	#N/A	#N/A	#N/A	3	#N/A	#N/A	#N/A	#N/A	#N/A	#N/A	#N/A	C2_05760C_A	C2_05760C_A	Predicted ORF from Assembly 19; repressed by nitric oxide; removed from Assembly 20; subsequently reinstated in Assembly 21 based on comparative genome analysis
Q59T43	#N/A	#N/A	#N/A	48	38	49	#N/A	#N/A	#N/A	#N/A	#N/A	#N/A	C2_05640W_A	C2_05640W_A	Putative helix-loop-helix (HLH) transcription factor with a role in filamentous growth
Q59T44	7	5	#N/A	10	13	11	#N/A	#N/A	#N/A	#N/A	#N/A	#N/A	C2_05610C_A	RPS8A	Small 40S ribosomal subunit protein; induced by ciclopirox olamine; repressed upon phagocytosis by murine macrophage; 5'-UTR intron; Hap43-induced; Spider biofilm repressed
Q59TE0	20	6	7	23	26	18	2	#N/A	1	#N/A	#N/A	2	C2_04600C_A	RPL17B	Ribosomal protein L17; mutation confers hypersensitivity to 5-FU, tubercidin; repressed upon phagocytosis by macrophage; Hap43-induced; Spider biofilm repressed
Q59TU0	5	#N/A	#N/A	1	9	3	#N/A	#N/A	#N/A	#N/A	#N/A	#N/A	C1_11650W_A	EGD1	Putative GAL4 DNA-binding enhancer protein; soluble protein in hyphae; biofilm induced; macrophage/pseudohyphal-induced; equal level of protein in exponential and stationary growth phase yeast cultures; Spider biofilm repressed
Q59U73	#N/A	#N/A	#N/A	#N/A	#N/A	#N/A	#N/A	#N/A	#N/A	1	#N/A	#N/A	C2_07500C_A	MED4	RNA polymerase II core mediator complex subunit
Q59U85	#N/A	#N/A	#N/A	#N/A	1	#N/A	#N/A	#N/A	#N/A	#N/A	#N/A	#N/A	C2_07590W_A	VMA10	Subunit G of the V1 peripheral membrane domain of the vacuolar H+-ATPase (V-ATPase); involved in vacuolar acidification; rat catheter biofilm repressed
Q59V63	#N/A	#N/A	#N/A	#N/A	#N/A	#N/A	#N/A	#N/A	#N/A	#N/A	#N/A	1	CR_07590W_A	EMP24	COPII-coated vesicle component
Q59V85	2	1	#N/A	1	2	2	#N/A	#N/A	#N/A	#N/A	#N/A	#N/A	CR_06120W_A	RPL7	Ribosomal protein L7; repressed upon phagocytosis by murine macrophages; Hap43-induced; rat catheter and Spider biofilm induced
Q59VG6	#N/A	#N/A	#N/A	#N/A	#N/A	2	#N/A	#N/A	#N/A	#N/A	#N/A	#N/A	C1_04770C_A	ERG3	C-5 sterol desaturase; introduces C-5(6) double bond into episterol; some clinical isolates show increased azole resistance and defects in hyphal growth and virulence; Efg1p-repressed; fluconazole-induced
Q59VN2	#N/A	#N/A	#N/A	1	#N/A	3	#N/A	#N/A	#N/A	1	#N/A	#N/A	C1_04260W_A	HHT21	Putative histone H3; amphotericin B repressed; regulated by Efg1, farnesol; Hap43-induced; rat catheter and Spider biofilm repressed
Q59VN4	9	8	4	12	18	18	#N/A	#N/A	1	1	2	1	CR_06800C_A	HHF22	Putative histone H4; regulated by Efg1; flucytosine, fluconazole-induced; amphotericin B, caspofungin repressed; colony morphology-related gene regulation by Ssn6; Hap43-induced; rat catheter and Spider biofilm repressed
Q59VP0	#N/A	#N/A	#N/A	#N/A	#N/A	#N/A	#N/A	#N/A	#N/A	#N/A	1	#N/A	C1_04190C_A	BST1	Inositol deacylase involved in attachment of GPI-anchored proteins to cell wall; required for host invasion and immune escape
Q59VP1	7	5	5	13	17	17	#N/A	#N/A	#N/A	1	#N/A	#N/A	C1_04180W_A	C1_04180W_A	Predicted histone H2B; Hap43-induced gene; Spider biofilm repressed
Q59VP2	0	5	0	#N/A	#N/A	0	#N/A	#N/A	#N/A	#N/A	#N/A	#N/A	C1_04170C_A	HTA2	Putative histone H2A; farnesol regulated; rat catheter biofilm repressed; Spider biofilm repressed; Hap43-induced
Q59VR3	#N/A	#N/A	#N/A	4	3	5	#N/A	#N/A	#N/A	#N/A	#N/A	#N/A	C1_03790C_A	C1_03790C_A	Putative peptidyl-prolyl cis-trans isomerase
Q59W44	#N/A	#N/A	#N/A	#N/A	#N/A	1	#N/A	#N/A	#N/A	#N/A	#N/A	#N/A	C1_11220C_A	TIM50	Predicted component of the Translocase of the Inner Mitochondrial membrane (TIM23 complex); involved in mitochondrial protein import; Spider biofilm repressed
Q59W54	#N/A	#N/A	#N/A	#N/A	6	#N/A	#N/A	#N/A	#N/A	#N/A	#N/A	#N/A	C1_11330C_A	SMT3	SUMO, small ubiquitin-like protein; Smt3p-conjugated proteins localize to septation site and mother side of bud neck; C. albicans septins appear not to be Smt3p-modified, in contrast to S. cerevisiae septins
Q59WE2	#N/A	#N/A	#N/A	#N/A	1	#N/A	#N/A	#N/A	#N/A	#N/A	#N/A	#N/A	C1_07410C_A	SKP1	Putative subunit D of kinetochore protein complex CBF3; regulated by Gcn4p; repressed in response to amino acid starvation (3-aminotriazole treatment)
Q59WG3	#N/A	#N/A	#N/A	#N/A	2	#N/A	#N/A	#N/A	#N/A	#N/A	#N/A	#N/A	C1_10790W_A	CDC48	Putative microsomal ATPase; plasma membrane-localized; regulated by Gcn2 and Gcn4; induced by amino acid starvation (3-AT); macrophage/pseudohyphal-repressed; protein levels decrease in stationary phase yeast; Spider biofilm repressed
Q59WT3	#N/A	#N/A	#N/A	#N/A	#N/A	1	#N/A	#N/A	#N/A	#N/A	#N/A	#N/A	C6_01110W_A	FAD2	Delta-12 fatty acid desaturase, involved in production of linoleic acid, which is a major component of membranes
Q59XX2	#N/A	#N/A	#N/A	#N/A	1	#N/A	#N/A	#N/A	#N/A	#N/A	#N/A	#N/A	C2_10030C_A	MP65	Cell surface mannoprotein; cell-wall glucan metabolism, adhesion; adhesin motif; O-glycosylation; induced by heat, germ tube formation, wall regeneration; mycelial antigen; diagnostic marker; fluconazole-repressed; Spider biofilm induced
Q59Y31	2	1	#N/A	2	2	1	#N/A	#N/A	#N/A	#N/A	#N/A	#N/A	C2_08590W_A	YWP1	Secreted yeast wall protein; possible role in dispersal in host; involved in adhesion and biofilm formation; propeptide; growth phase, phosphate, Ssk1/Ssn6/Efg1/Efh1/Hap43 regulated; mRNA binds She3; flow and Spider biofilm repressed
Q59Y38	#N/A	#N/A	#N/A	#N/A	2	#N/A	#N/A	#N/A	#N/A	#N/A	#N/A	#N/A	C2_08650W_A	C2_08650W_A	Protein of unknown function; Hap43-repressed gene; repressed by nitric oxide
Q59YF0	#N/A	#N/A	#N/A	#N/A	#N/A	1	#N/A	#N/A	#N/A	#N/A	#N/A	#N/A	C2_09740W_A	SSO2	Plasma membrane t-SNARE; involved in fusion of secretory vesicles at the plasma membrane
Q59YG5	#N/A	#N/A	#N/A	#N/A	1	#N/A	#N/A	#N/A	#N/A	#N/A	#N/A	#N/A	C2_09900C_A	TIM23	Protein involved in mitochondrial matrix protein import
Q59YH5	#N/A	#N/A	#N/A	#N/A	1	#N/A	#N/A	#N/A	#N/A	#N/A	#N/A	#N/A	C5_01700W_A	C5_01700W_A	Mitochondrial ribosomal protein of the large subunit; rat catheter biofilm induced
Q59YJ9	#N/A	#N/A	#N/A	3	#N/A	#N/A	#N/A	#N/A	#N/A	#N/A	#N/A	#N/A	C5_01910W_A	GIS2	Translational activator for mRNAs with internal ribosome entry sites; induced in high iron; repressed by yeast-hypha switch; null exhibits sensitivity to sorbitol, 5-fluorocytosine, and cold temperatures; Spider biofilm repressed
Q59YS7	#N/A	#N/A	#N/A	#N/A	#N/A	#N/A	6	#N/A	5	7	3	5	C3_05610W_A	MNN14	Predicted alpha-1,3-mannosyltransferase activity with a role in protein glycosylation; Hap43-repressed; Spider biofilm induced
Q59ZE0	#N/A	1	#N/A	#N/A	7	7	#N/A	#N/A	#N/A	#N/A	#N/A	#N/A	C2_05500W_A	ATP4	Putative F0-ATP synthase subunit 4; macrophage/pseudohyphal-induced; present in exponential and stationary growth phases
Q59ZE2	#N/A	#N/A	#N/A	#N/A	#N/A	#N/A	#N/A	#N/A	#N/A	#N/A	#N/A	1	C2_05470W_A	COQ5	Putative methyltransferase of ubiquinone biosynthesis; regulated by Gcn4; repressed by amino acid starvation (3-AT), Hap43; induced upon adherence to polystyrene; Spider biofilm repressed
Q59ZV5	2	#N/A	#N/A	1	3	2	#N/A	#N/A	#N/A	#N/A	#N/A	#N/A	C1_14260C_A	TIF35	Putative translation initiation factor; repressed upon phagocytosis by murine macrophage; Spider biofilm repressed
Q59ZX3	#N/A	#N/A	#N/A	1	1	#N/A	#N/A	#N/A	#N/A	#N/A	#N/A	#N/A	C1_14120C_A	RBE1	Pry family cell wall protein; Rim101, Efg1, Ssn6, alkaline repressed; O-glycosylation; no GPI anchor predicted; ketoconazol induced; regulated by Sef1, Sfu1, Hap4; flow model biofilm induced; rat catheter and Spider biofilm repressed
Q5A0L0	#N/A	#N/A	#N/A	#N/A	1	#N/A	#N/A	#N/A	#N/A	#N/A	#N/A	#N/A	C2_03010C_A	RNR21	Ribonucleoside-diphosphate reductase; regulated by tyrosol and cell density; ciclopirox olamine, fluconazole or flucytosine induced; regulated by Sef1, Sfu1, and Hap43
Q5A0M4	7	1	2	16	22	10	#N/A	#N/A	2	#N/A	#N/A	1	C2_03100W_A	EFT2	Elongation Factor 2 (eEF2); GTPase; essential; highly expressed; target of sordarin antifungals; antigenic in human/mouse; lacks site for regulatory phosphorylation by eEF2 kinase; GCN-regulated; higher protein amount in stationary phase
Q5A0V9	11	6	4	11	15	17	2	#N/A	#N/A	#N/A	#N/A	#N/A	C4_06720W_A	NOP1	Nucleolar protein; flucytosine induced; Hap43-induced; Spider biofilm repressed
Q5A0Z9	5	3	1	15	14	9	#N/A	#N/A	#N/A	#N/A	#N/A	#N/A	C4_07110C_A	PDA1	Putative pyruvate dehydrogenase alpha chain; fluconazole-induced; protein present in exponential and stationary growth phase yeast cultures; Hap43-induced; Spider biofilm repressed
Q5A109	14	7	6	23	32	22	#N/A	#N/A	4	#N/A	#N/A	#N/A	C4_07180W_A	UBI3	Fusion of ubiquitin with the S34 protein of the small ribosomal subunit; mRNA decreases upon heat shock, appears to be degraded; functional homolog of S. cerevisiae RPS31; Hap43-induced; Spider biofilm repressed
Q5A1C0	#N/A	#N/A	#N/A	#N/A	#N/A	#N/A	#N/A	#N/A	#N/A	19	#N/A	#N/A	C4_06360C_A	C4_06360C_A	Ortholog of C. dubliniensis CD36 : Cd36_45850, C. parapsilosis CDC317 : CPAR2_500750, Pichia stipitis Pignal : PICST_43336, Candida tropicalis MYA-3404 : CTRG_04038 and Candida albicans WO-1 : CAWG_03191
Q5A1E8	#N/A	#N/A	#N/A	1	2	1	#N/A	#N/A	#N/A	#N/A	#N/A	#N/A	C4_06610C_A	SDH12	Succinate dehydrogenase; soluble protein in hyphae; macrophage-downregulated protein level; downregulated by Efg1p; repressed by nitric oxide; protein present in exponential and stationary growth phase yeast cultures; Hap43p-repressed gene
Q5A1M5	#N/A	#N/A	#N/A	#N/A	1	#N/A	#N/A	#N/A	#N/A	#N/A	#N/A	#N/A	C5_01000C_A	C5_01000C_A	Putative vacuole biogenesis protein
Q5A222	#N/A	#N/A	#N/A	2	7	6	#N/A	#N/A	#N/A	#N/A	#N/A	#N/A	CR_02620C_A	CR_02620C_A	Protein of unknown function; Hap43-repressed gene; repressed by nitric oxide
Q5A2A0	#N/A	#N/A	#N/A	#N/A	1	#N/A	#N/A	#N/A	#N/A	#N/A	#N/A	#N/A	C1_05240C_A	RPT1	Putative 26S proteasome regulatory subunit 7; Hap43p-repressed gene; regulated by Gcn2p and Gcn4p; overlaps orf19.442
Q5A2S9	#N/A	#N/A	#N/A	#N/A	#N/A	#N/A	#N/A	#N/A	#N/A	23	#N/A	#N/A	C2_07950W_A	SEH1	Ortholog(s) have role in positive regulation of TORC1 signaling and Seh1-associated complex, extrinsic component of fungal-type vacuolar membrane, nuclear periphery, nuclear pore, nuclear pore outer ring localization
Q5A2V2	1	1	1	1	2	2	#N/A	#N/A	#N/A	#N/A	#N/A	#N/A	C3_06700C_A	C3_06700C_A	Putative mitochondrial protein with a predicted role in respiratory growth; fluconazole-induced; ketoconazole-repressed; mutants display a strong defect in flow model biofilm formation; Spider biofilm induced
Q5A302	#N/A	#N/A	#N/A	#N/A	1	1	#N/A	#N/A	#N/A	#N/A	#N/A	#N/A	C3_06250W_A	ERV25	Component of COPII-coated vesicles; transcript induced upon filamentous growth; rat catheter biofilm repressed
Q5A340	#N/A	#N/A	#N/A	23	#N/A	#N/A	#N/A	#N/A	#N/A	#N/A	#N/A	#N/A	CR_08550W_A	CR_08550W_A	Ortholog(s) have fructose-2,6-bisphosphate 2-phosphatase activity and role in glucose metabolic process
Q5A389	5	2	2	4	11	11	#N/A	#N/A	#N/A	#N/A	#N/A	#N/A	CR_08150W_A	RPS20	Putative ribosomal protein; repressed upon phagocytosis by murine macrophage; transcript positively regulated by Tbf1; Spider biofilm repressed
Q5A397	7	2	1	19	29	14	#N/A	#N/A	3	#N/A	#N/A	#N/A	CR_08090W_A	SSB1	HSP70 family heat shock protein; mRNA in yeast and germ tubes; at yeast cell surface, not hyphae; antigenic in human/mouse infection; macrophage, GCN-induced; possibly essential; sumoylation target; Hap43-induced; Spider biofilm repressed
Q5A398	#N/A	#N/A	#N/A	#N/A	#N/A	#N/A	2	#N/A	#N/A	#N/A	2	2	CR_08080W_A	CR_08080W_A	Has domain(s) with predicted RNA binding activity
Q5A399	3	#N/A	#N/A	#N/A	#N/A	#N/A	#N/A	#N/A	#N/A	#N/A	#N/A	#N/A	CR_08070W_A	PTP1	Phosphotyrosine-specific protein phosphatase; rat catheter biofilm induced
Q5A4E2	#N/A	#N/A	#N/A	2	5	#N/A	#N/A	#N/A	#N/A	#N/A	#N/A	#N/A	C3_06100C_A	DED1	Predicted ATP-dependent RNA helicase; RNA strand annealing activity; Spider biofilm induced
Q5A4P9	1	#N/A	#N/A	2	5	2	#N/A	#N/A	#N/A	#N/A	#N/A	#N/A	C6_01890C_A	C6_01890C_A	Putative DEAD-box helicase; Hap43-induced; Spider biofilm induced
Q5A4Q1	#N/A	#N/A	#N/A	#N/A	2	#N/A	#N/A	#N/A	#N/A	#N/A	#N/A	#N/A	C6_01910W_A	ADK1	Putative adenylate kinase; repressed in hyphae; macrophage-induced protein; adenylate kinase release used as marker for cell lysis; possibly essential (UAU1 method); flow model biofilm induced; rat catheter and Spider biofilm repressed
Q5A4Y4	#N/A	#N/A	1	#N/A	3	2	#N/A	#N/A	#N/A	#N/A	#N/A	#N/A	C5_00310C_A	C5_00310C_A	Protein with a fungal RNA polymerase I subunit RPA14 domain; proposed to play a role in the recruitment of pol I to the promoter; Hap43-induced gene
Q5A516	10	10	7	12	22	21	#N/A	#N/A	#N/A	#N/A	#N/A	#N/A	C5_00590W_A	PET9	Mitochondrial ADP/ATP carrier protein involved in ATP biosynthesis; possible lipid raft component; 3 predicted transmembrane helices; flucytosine induced; ketoconazole-induced; downregulated by Efg1p
Q5A5Q8	5	4	2	11	19	17	#N/A	#N/A	#N/A	#N/A	#N/A	#N/A	C2_10620W_A	RPS4A	Predicted ribosomal protein, component of the small ribosomal subunit; repressed upon phagocytosis by murine macrophage; positively regulated by Tbf1; mutant is defective in filamentous growth and sensitive to osmotic stress
Q5A5V6	#N/A	#N/A	#N/A	#N/A	2	#N/A	#N/A	#N/A	#N/A	#N/A	#N/A	#N/A	C4_04150C_A	PDB1	Putative pyruvate dehydrogenase; fluconazole-induced; protein level decreases in stationary phase cultures; Spider biofilm repressed
Q5A6A1	15	7	3	22	27	21	3	#N/A	2	1	1	4	C4_04890C_A	RPL24A	Predicted ribosomal protein; downregulated upon phagocytosis by murine macrophage; intron in 5'-UTR; Hap43-induced; Spider biofilm repressed
Q5A6M9	3	1	1	5	3	4	#N/A	#N/A	#N/A	#N/A	#N/A	#N/A	CR_04360C_A	NHP2	Putative H/ACA snoRNP protein; macrophage/pseudohyphal-induced
Q5A6R1	13	3	3	13	19	13	#N/A	#N/A	#N/A	#N/A	#N/A	#N/A	CR_04100C_A	RPL15A	Putative ribosomal protein; repressed upon phagocytosis by murine macrophage; positively regulated by Tbf1; Spider biofilm repressed
Q5A6R2	#N/A	#N/A	#N/A	#N/A	1	#N/A	#N/A	#N/A	#N/A	#N/A	#N/A	#N/A	CR_04090C_A	ADE17	5-Aminoimidazole-4-carboxamide ribotide transformylase, enzyme of adenine biosynthesis; antigenic in human; soluble protein in hyphae; not induced during GCN response, in contrast to the S. cerevisiae ortholog
Q5A6S0	3	1	1	4	5	6	#N/A	#N/A	#N/A	#N/A	#N/A	#N/A	CR_04010C_A	MRPL40	Putative mitochondrial ribosomal protein; Spider biofilm repressed
Q5A747	#N/A	#N/A	#N/A	#N/A	4	1	#N/A	#N/A	#N/A	#N/A	#N/A	#N/A	C1_08360C_A	OLE1	Fatty acid desaturase, essential protein involved in oleic acid synthesis; required for aerobic hyphal growth and chlamydospore formation; subject to hypoxic regulation; fluconazole-induced; caspofungin repressed; Hap43p-induced
Q5A750	#N/A	#N/A	#N/A	5	9	4	#N/A	#N/A	#N/A	#N/A	#N/A	#N/A	C1_08320W_A	TKL1	Putative transketolase; localizes to surface of yeast cells, not hyphae; soluble protein in hyphae; transcript regulated by Nrg1, Mig1, and Tup1; antigenic in human or murine infection; possibly essential (by UAU1 method)
Q5A782	#N/A	#N/A	#N/A	4	6	4	#N/A	#N/A	#N/A	#N/A	#N/A	#N/A	C1_08090C_A	FUN12	Functional homolog of S. cerevisiae Fun12 translation initiation factor eIF5B; genes encoding ribosomal subunits, translation factors, and tRNA synthetases are downregulated upon phagocytosis by murine macrophage
Q5A784	#N/A	#N/A	#N/A	#N/A	1	#N/A	#N/A	#N/A	#N/A	#N/A	#N/A	#N/A	C1_08060W_A	OFR1	Protein involved in regulation of white-opaque switching; Hap43-repressed gene; rat catheter biofilm repressed
Q5A785	#N/A	#N/A	#N/A	#N/A	1	#N/A	#N/A	#N/A	#N/A	#N/A	#N/A	#N/A	C1_08050W_A	C1_08050W_A	Protein of unknown function; Hap43-repressed gene; repressed by nitric oxide
Q5A786	#N/A	#N/A	#N/A	#N/A	1	#N/A	#N/A	#N/A	#N/A	#N/A	#N/A	#N/A	C1_08030W_A	PFY1	Profilin; functional homolog of S. cerevisiae Pfy1; hyphae, macrophage/pseudohyphal-induced; regulated by Nrg1, Tup1; gene lacks intron (unlike S. cerevisiae PFY1); complements growth of S. cerevisiae srv2 mutant; nonessential
Q5A799	1	#N/A	1	3	4	3	#N/A	#N/A	#N/A	#N/A	#N/A	#N/A	C1_07900W_A	COI1	Secreted protein; ciclopirox olamine induced; regulated by Ssn6; induced by nitric oxide independent of Yhb1; Hap43-induced; Spider biofilm repressed
Q5A7K0	15	8	6	19	22	26	1	#N/A	2	#N/A	#N/A	1	C3_00090W_A	RPS24	Predicted ribosomal protein; hyphal downregulated; repressed upon phagocytosis by murine macrophage; transcriptionally activated by Tbf1; Spider biofilm repressed
Q5A7M2	#N/A	#N/A	#N/A	#N/A	2	#N/A	#N/A	#N/A	#N/A	#N/A	#N/A	#N/A	C3_00250C_A	TIM44	Protein involved in transport across membranes; Spider biofilm repressed
Q5A7M9	#N/A	1	#N/A	1	6	4	#N/A	#N/A	#N/A	#N/A	#N/A	#N/A	C3_00320W_A	RHR2	Glycerol 3-phosphatase; roles in osmotic tolerance, glycerol accumulation in response to salt; Spider/flow model biofilm induced; regulated by macrophage, stress, yeast-hyphal switch, pheromone, Gcn4, Hog1, Nrg1, Tup1
Q5A7P7	1	#N/A	#N/A	#N/A	11	7	#N/A	#N/A	#N/A	#N/A	#N/A	#N/A	C3_00460W_A	ATP5	Putative F0-ATP synthase FO subunit B; caspofungin repressed; protein level decreased in stationary phase yeast cultures; Spider biofilm repressed
Q5A8X6	#N/A	#N/A	#N/A	#N/A	2	#N/A	#N/A	#N/A	#N/A	#N/A	#N/A	#N/A	C1_01690C_A	LSC1	Putative succinate-CoA ligase subunit; induced by high iron; fluconazole-induced; protein present in exponential and stationary growth phase yeast cultures; Spider biofilm repressed
Q5A8Y7	1	#N/A	#N/A	#N/A	#N/A	#N/A	#N/A	#N/A	#N/A	#N/A	#N/A	#N/A	C1_01570C_A	RPB7	Functional homolog of S. cerevisiae Rpb7; essential subunit of RNA Polymerase II; enhances hyperfilamentation of an S. cerevisiae rpb4 mutant; suppresses defects of S. cerevisiae rpb4 and ess1 mutants; Spider biofilm repressed
Q5A8Z9	#N/A	#N/A	#N/A	1	#N/A	1	#N/A	#N/A	#N/A	#N/A	#N/A	#N/A	C1_01490W_A	C1_01490W_A	Plasma membrane protein of unknown function; colony morphology-related gene regulation by Ssn6; repressed by nitric oxide
Q5A900	#N/A	#N/A	#N/A	3	12	3	#N/A	#N/A	#N/A	#N/A	#N/A	#N/A	C1_01480C_A	RPS21	Protein component of the small (40S) subunit; repressed upon phagocytosis by murine macrophage; positively regulated by Tbf1; Spider biofilm repressed
Q5A940	#N/A	#N/A	#N/A	#N/A	10	#N/A	#N/A	#N/A	#N/A	#N/A	#N/A	#N/A	C1_01060W_A	MBF1	Putative transcriptional coactivator; caspofungin repressed; involved in virulence
Q5A9D9	#N/A	#N/A	#N/A	#N/A	4	2	#N/A	#N/A	#N/A	#N/A	#N/A	#N/A	CR_01400W_A	LYS12	Homoisocitrate dehydrogenase; catalyzes 4th step in the alpha-aminoadipate pathway of lysine biosynthesis; clade-associated gene expression; protein level decreases in stationary phase cultures; Spider biofilm repressed
Q5AA00	#N/A	#N/A	#N/A	#N/A	#N/A	1	#N/A	#N/A	#N/A	#N/A	#N/A	#N/A	C1_05670W_A	C1_05670W_A	Has domain(s) with predicted peptidase activity and role in proteolysis
Q5AAR0	#N/A	#N/A	#N/A	#N/A	1	1	#N/A	#N/A	#N/A	#N/A	#N/A	#N/A	C1_06590C_A	C1_06590C_A	Ortholog(s) have RNA polymerase II complex binding, RNA polymerase II transcription factor binding activity
Q5AAR2	1	#N/A	#N/A	#N/A	2	#N/A	#N/A	#N/A	#N/A	#N/A	#N/A	#N/A	C1_06600W_A	C1_06600W_A	Ortholog(s) have eukaryotic initiation factor 4G binding, mRNA binding activity and role in cytoplasmic mRNA processing body assembly, negative regulation of translational initiation, stress granule assembly
Q5AB84	2	1	#N/A	4	5	3	#N/A	#N/A	#N/A	#N/A	#N/A	#N/A	C1_00160C_A	C1_00160C_A	Putative nucleolar protein with a predicted role in pre-rRNA processing and ribosome biogenesis; repressed by nitric oxide; required for flow model biofilm formation; Spider biofilm repressed
Q5AB86	#N/A	#N/A	#N/A	#N/A	#N/A	#N/A	3	#N/A	3	4	3	3	C1_00170W_A	LEU4	Putative 2-isopropylmalate synthase; regulated by Nrg1, Mig1, Tup1, Gcn4; induced by human whole blood or PMNs; macrophage/pseudohyphal-repressed after 16h; Spider biofilm repressed
Q5AB87	4	2	2	5	9	4	1	#N/A	2	2	1	3	C1_00180W_A	RPL16A	Ribosomal protein; transposon mutation affects filamentous growth; repressed upon phagocytosis by murine macrophages; Hap43-induced; Spider biofilm repressed
Q5AB88	#N/A	#N/A	#N/A	31	19	#N/A	#N/A	#N/A	#N/A	#N/A	#N/A	#N/A	C1_00190C_A	C1_00190C_A	Protein of unknown function; flow model biofilm induced; Spider biofilm induced
Q5ABB1	3	#N/A	#N/A	#N/A	3	#N/A	#N/A	#N/A	#N/A	#N/A	#N/A	#N/A	C1_00490C_A	TTR1	Putative glutaredoxin; described as a glutathione reductase; induced by human neutrophils and benomyl treatment; alkaline repressed; regulated by Gcn2 and Gcn4; required for virulence in mouse model; Spider biofilm induced
Q5ABC3	#N/A	2	#N/A	5	8	7	#N/A	#N/A	#N/A	#N/A	#N/A	#N/A	C1_00590W_A	TUF1	Translation elongation factor TU; macrophage/pseudohyphal-induced; repressed upon phagocytosis by murine macrophage; levels decrease in stationary phase cells; Spider biofilm repressed
Q5ABP8	9	4	1	6	8	10	#N/A	#N/A	#N/A	#N/A	#N/A	#N/A	C1_00770C_A	ROT1	Similar to S. cerevisiae Rot1p, which is involved in cell wall 1,6-beta-glucan biosynthesis; has predicted transmembrane region; possibly an essential gene, disruptants not obtained by UAU1 method
Q5ABS1	#N/A	#N/A	#N/A	#N/A	8	2	#N/A	#N/A	#N/A	#N/A	#N/A	#N/A	C6_03400C_A	QCR7	Putative ubiquinol-cytochrome-c reductase, subunit 7; Hap43p-repressed gene
Q5ACZ2	#N/A	#N/A	#N/A	#N/A	1	#N/A	#N/A	#N/A	#N/A	#N/A	#N/A	#N/A	C2_00520W_A	DFG5	N-linked mannoprotein of cell wall and membrane; possible signal transducer; role in hyphal growth and HWP1 induction in alkaline pH; GPI modification predicted; dfg5 dcw1 double mutant is inviable; caspofungin-induced, fungal-specific
Q5AD47	#N/A	#N/A	#N/A	#N/A	#N/A	#N/A	0	#N/A	0	0	#N/A	0	C2_01020W_A	HGT6	Putative high-affinity MFS glucose transporter; 20 family members; induced in core stress response; fluconazole, oralpharyngeal candidasis induced; flow model biofilm induced; Spider biofilm induced
Q5AD50	#N/A	#N/A	#N/A	2	3	#N/A	#N/A	#N/A	#N/A	#N/A	#N/A	#N/A	C2_01070W_A	C2_01070W_A	Ortholog(s) have RNA polymerase I activity and role in nucleolar large rRNA transcription by RNA polymerase I, transcription by RNA polymerase I, transcription elongation from RNA polymerase I promoter
Q5ADM5	#N/A	#N/A	#N/A	#N/A	#N/A	1	#N/A	#N/A	#N/A	#N/A	#N/A	#N/A	C3_06860C_A	C3_06860C_A	Putative xylose and arabinose reductase; flow model biofilm induced; Spider biofilm repressed
Q5ADM7	13	5	1	29	34	15	1	#N/A	#N/A	#N/A	#N/A	#N/A	C3_06870W_A	TDH3	NAD-linked glyceraldehyde-3-phosphate dehydrogenase; binds fibronectin, laminin; at cell surface; antigenic in infection; farnesol-repressed; stationary phase-enriched; GlcNAc-induced; flow model biofilm induced; Spider biofilm repressed
Q5ADP3	#N/A	#N/A	#N/A	#N/A	1	#N/A	#N/A	#N/A	#N/A	#N/A	#N/A	#N/A	C3_07020W_A	SSN6	Functional homolog of S. cerevisiae Cyc8/Ssn6; hyphal growth regulator; repressed during hyphal growth; Ssn6 and Tup1 regulate distinct sets of genes; overexpression or mutation causes avirulence in mouse IV infection; TPR motifs
Q5ADQ0	#N/A	#N/A	#N/A	0	#N/A	0	#N/A	#N/A	#N/A	0	#N/A	#N/A	C3_07090W_A	HHT1	Histone H3 variant, specific to CTG-clade species; acts in regulation of planktonic and biofilm growth; reduced mRNA abundance in fkh2 mutant; farnesol regulated; Spider biofilm induced; rat catheter biofilm repressed
Q5ADQ6	#N/A	#N/A	#N/A	2	3	#N/A	#N/A	#N/A	#N/A	#N/A	#N/A	#N/A	C3_07150C_A	RPS12	Acidic ribosomal protein S12; regulated by Gcn4, activated by Tbf1; repressed by amino acid starvation (3-AT); protein abundance is affected by URA3 expression in CAI-4 strain background; sumoylation target; Spider biofilm repressed
Q5ADQ9	1	#N/A	#N/A	1	2	2	#N/A	#N/A	#N/A	#N/A	#N/A	#N/A	C3_07180C_A	BMT1	Beta-mannosyltransferase, required for addition of the 1st beta-mannose residue to acid-stable fraction of cell wall phosphopeptidomannan; 9-gene family member; mutants induce higher levels of inflammatory cytokines in mouse dendritic cells
Q5ADR3	3	2	1	3	2	3	#N/A	#N/A	#N/A	#N/A	#N/A	#N/A	C3_07230W_A	C3_07230W_A	Aminophospholipid translocase (flippase); maintains membrane lipid asymmetry in post-Golgi secretory vesicles; contributes to clathrin-coated vesicle formation and endocytosis; flow model biofilm repressed
Q5ADT0	#N/A	#N/A	#N/A	#N/A	1	#N/A	#N/A	#N/A	#N/A	#N/A	#N/A	#N/A	C3_07310C_A	SLK19	Alkaline-induced protein of plasma membrane; affects cell aggregation, cell wall; similar to S. cerevisiae Slk19p (a kinetochore protein with roles in mitosis, meiosis); required for wild-type virulence in mouse; macrophage-downregulated
Q5ADU2	#N/A	#N/A	#N/A	#N/A	1	1	#N/A	#N/A	#N/A	#N/A	#N/A	#N/A	C3_07410C_A	KRS1	Putative tRNA-Lys synthetase; repressed upon phagocytosis by murine macrophages; stationary phase enriched protein; Spider biofilm repressed
Q5AEE1	1	1	1	1	1	2	#N/A	#N/A	#N/A	2	4	#N/A	C3_03280C_A	HTA3	Putative histone H2A; amphotericin B repressed; flucytosine induced; RNA abundance regulated by tyrosol and cell density; Spider biofilm repressed
Q5AEI1	#N/A	#N/A	1	#N/A	3	2	#N/A	#N/A	#N/A	#N/A	#N/A	#N/A	C3_02940C_A	NUO2	NADH-ubiquinone oxidoreductase subunit; Hap43p-repressed gene; repressed by nitric oxide; identified in detergent-resistant membrane fraction (possible lipid raft component)
Q5AEN2	#N/A	1	#N/A	6	5	3	#N/A	#N/A	#N/A	#N/A	#N/A	#N/A	C3_02470C_A	RPL9B	Ribosomal protein L9; repressed upon phagocytosis by murine macrophages; repressed by nitric oxide; protein levels decrease in stationary phase; Hap43-induced; Spider biofilm repressed
Q5AF62	1	#N/A	#N/A	#N/A	#N/A	#N/A	#N/A	#N/A	#N/A	#N/A	#N/A	#N/A	C4_02550C_A	EMP70	Protein with a role in endosome-to-vacuole sorting; rat catheter biofilm repressed
Q5AF98	#N/A	#N/A	#N/A	4	3	#N/A	#N/A	#N/A	#N/A	#N/A	#N/A	#N/A	C4_02870C_A	ZUO1	Ortholog of S. cerevisiae Zuo1; a cytosolic ribosome-associated chaperone; likely to be essential for growth, based on an insertional mutagenesis strategy; Spider biofilm repressed
Q5AFG1	#N/A	#N/A	#N/A	#N/A	1	#N/A	#N/A	#N/A	#N/A	#N/A	#N/A	#N/A	C7_00160C_A	C7_00160C_A	Ortholog(s) have role in ribosomal large subunit biogenesis and cytoplasm, nucleus localization
Q5AFN8	2	2	#N/A	3	4	4	#N/A	#N/A	#N/A	#N/A	#N/A	#N/A	C7_00860W_A	SSR1	Beta-glucan associated ser/thr rich cell-wall protein with a role in cell wall structure; GPI anchor; highly mutable due to internal Ser-Ala tandem repeats; detected at germ tube plasma membrane; repressed in cells treated with Congo Red;
Q5AG43	1	#N/A	#N/A	4	2	2	#N/A	#N/A	#N/A	#N/A	#N/A	#N/A	C5_03070W_A	RPS5	Ribosomal protein S5; macrophage/pseudohyphal-induced after 16 h; downregulated upon phagocytosis by murine macrophage; Hap43-induced; Spider biofilm repressed
Q5AG68	#N/A	#N/A	#N/A	3	2	#N/A	#N/A	#N/A	#N/A	#N/A	#N/A	#N/A	C5_02890W_A	YNK1	Nucleoside diphosphate kinase (NDP kinase); homo-hexameric; soluble protein in hyphae; flucytosine induced; biofilm induced; macrophage-induced protein; stationary phase enriched protein; Spider biofilm repressed
Q5AG96	#N/A	#N/A	#N/A	#N/A	2	#N/A	#N/A	#N/A	#N/A	#N/A	#N/A	#N/A	C5_02660C_A	C5_02660C_A	Ortholog(s) have role in cytoplasmic translational initiation
Q5AGV4	#N/A	1	#N/A	#N/A	6	6	#N/A	#N/A	#N/A	#N/A	#N/A	#N/A	C7_01450C_A	PRT1	Putative translation initiation factor eIF3; mutation confers hypersensitivity to roridin A, verrucarin A; genes encoding ribosomal subunits, translation factors, tRNA synthetases are downregulated upon phagocytosis by murine macrophages
Q5AGV9	#N/A	#N/A	#N/A	#N/A	#N/A	#N/A	#N/A	#N/A	7	#N/A	#N/A	3	C7_01500W_A	C7_01500W_A	Ortholog of C. dubliniensis CD36 : Cd36_71340, C. parapsilosis CDC317 : CPAR2_301350, C. auris B8441 : B9J08_004871 and Candida tenuis NRRL Y-1498 : CANTEDRAFT_114098
Q5AGX8	3	1	2	2	4	4	#N/A	#N/A	#N/A	#N/A	#N/A	#N/A	C7_01640W_A	LAT1	Putative dihydrolipoamide acetyltransferase component (E2) of pyruvate dehydrogenase complex; sumoylation target; Spider biofilm repressed
Q5AGZ7	1	#N/A	#N/A	4	2	3	2	#N/A	2	#N/A	#N/A	2	C7_01790C_A	RPL5	Ribosomal protein; repressed upon phagocytosis by murine macrophages; Hap43-induced; Spider biofilm repressed
Q5AGZ8	#N/A	#N/A	#N/A	1	2	#N/A	#N/A	#N/A	#N/A	#N/A	#N/A	#N/A	C7_01800C_A	PFK2	Phosphofructokinase beta subunit; fructose 2,6-bisphosphate, AMP activated; ATP inhibited; phagocytosis, hyphal repressed; fluconazole-induced; stationary-phase enriched; flow model biofilm induced; rat catheter/Spider biofilm repressed
Q5AH02	13	2	3	14	14	14	#N/A	#N/A	#N/A	#N/A	#N/A	#N/A	C7_01840W_A	IQG1	Actomyosin ring component at bud neck; cell-cycle regulated ser phosphorylation at CDK sites regulate association with Bni1/Bnr1, Iqg1 degradation, and ring disassembly; mutation causes cytokinetic defects; rat catheter biofilm repressed
Q5AH14	#N/A	#N/A	#N/A	#N/A	2	2	#N/A	#N/A	#N/A	#N/A	#N/A	#N/A	C7_01970C_A	TOM40	Protein involved in mitochondrial protein import; Spider biofilm repressed
Q5AHI7	#N/A	#N/A	#N/A	1	2	1	#N/A	#N/A	#N/A	#N/A	#N/A	#N/A	C2_04120C_A	C2_04120C_A	Ortholog(s) have rRNA binding activity, role in maturation of LSU-rRNA from tricistronic rRNA transcript (SSU-rRNA, 5.8S rRNA, LSU-rRNA) and nucleolus, preribosome localization
Q5AHJ5	#N/A	#N/A	#N/A	#N/A	#N/A	#N/A	#N/A	#N/A	#N/A	#N/A	1	#N/A	C2_04200W_A	TBF1	Essential transcription factor; induces ribosomal protein genes and the rDNA locus; acts with Cbf1 at subset of promoters; recruits Fhl1 and Ifh1 to promoters; role is analogous to that of S. cerevisiae Rap1; Spider biofilm induced
Q5AHY8	6	2	2	3	2	4	#N/A	#N/A	#N/A	#N/A	#N/A	#N/A	C1_03650C_A	MRPL27	Putative 60S ribosomal protein L27, mitochondrial precursor
Q5AHZ2	#N/A	#N/A	#N/A	#N/A	1	#N/A	#N/A	#N/A	#N/A	#N/A	#N/A	#N/A	C1_03600W_A	C1_03600W_A	OPutative dolichyl-diphosphooligosaccharide-protein glycotransferase; role in protein N-linked glycosylation; Spider biofilm repressed
Q5AI00	#N/A	#N/A	#N/A	#N/A	1	#N/A	#N/A	#N/A	#N/A	#N/A	#N/A	#N/A	C1_03500W_A	YPT1	Functional homolog of S. cerevisiae Ypt1p, which is an essential small Ras-type GTPase involved in protein secretion at ER-to-Golgi; dominant-negative mutation causes SAP secretion defect and accumulation of intracellular secretory vesicles
Q5AI15	#N/A	#N/A	#N/A	6	12	5	#N/A	#N/A	#N/A	#N/A	#N/A	#N/A	C1_03370W_A	C1_03370W_A	Putative poly(A)-binding protein; regulated by Gcn4p; induced in response to amino acid starvation (3-AT treatment); protein present in exponential and stationary growth phase yeast cultures
Q5AI79	#N/A	#N/A	#N/A	#N/A	2	2	#N/A	#N/A	#N/A	#N/A	#N/A	#N/A	C1_02860C_A	YKT6	Putative protein of the vacuolar SNARE complex; predicted role in vacuolar fusion; rat catheter biofilm repressed
Q5AI86	#N/A	3	1	4	8	6	#N/A	#N/A	#N/A	#N/A	#N/A	#N/A	C1_02790W_A	TIF34	Putative translation initiation factor eIF3, p39 subunit; mutation confers hypersensitivity to roridin A, verrucarin A; downregulated upon phagocytosis by murine macrophages; Spider biofilm repressed
Q5AIB8	1	#N/A	1	6	12	4	#N/A	#N/A	#N/A	#N/A	#N/A	#N/A	C1_02460W_A	RPL10	Ribosomal protein L10; intron in 5'-UTR; downregulated upon phagocytosis by murine macrophage; transcription regulated by yeast-hypha switch; Spider biofilm repressed
Q5AJ63	#N/A	#N/A	#N/A	#N/A	#N/A	#N/A	#N/A	#N/A	#N/A	#N/A	1	#N/A	C3_01220W_A	C3_01220W_A	Putative transcription factor with zinc finger DNA-binding motif
Q5AJ93	17	9	6	26	32	25	1	#N/A	1	1	#N/A	1	C3_01490W_A	RPS7A	Ribosomal protein S7; genes encoding cytoplasmic ribosomal subunits, translation factors, and tRNA synthetases are downregulated upon phagocytosis by murine macrophage; Spider biofilm repressed
Q5AJC0	#N/A	#N/A	#N/A	#N/A	1	#N/A	#N/A	#N/A	#N/A	#N/A	#N/A	#N/A	C3_01730C_A	UTR2	Putative GPI anchored cell wall glycosidase; role in adhesion, hyphal growth on Spider (not serum) medium; chitin-binding, glycosyl hydrolase domains; induced during cell wall regeneration; mRNA in yeast-form cells; Spider biofilm induced
Q5AJC4	25	1	1	19	24	14	31	#N/A	25	23	18	18	C3_01790C_A	C3_01790C_A	Protein with a predicted SWI/SNF-related matrix-associated actin-dependent regulator of chromatin subfamily domain; Hap43-repressed gene
Q5AJD0	#N/A	#N/A	#N/A	#N/A	4	3	#N/A	#N/A	#N/A	#N/A	#N/A	#N/A	C3_01860C_A	DBP5	Ortholog(s) have RNA helicase activity, RNA-dependent ATPase activity, inositol hexakisphosphate binding activity and role in mRNA export from nucleus, poly(A)+ mRNA export from nucleus, tRNA export from nucleus, translational termination
Q5AJF7	7	3	2	6	11	8	#N/A	#N/A	#N/A	#N/A	#N/A	#N/A	C3_02110W_A	RPL12	Ribosomal protein L12, 60S ribosomal subunit; downregulated by human whole blood or polymorphonuclear cells; genes encoding cytoplasmic ribosomal subunits are downregulated upon phagocytosis by macrophage; Tbf1p-activated; Hap43p-induced
Q5AJY5	#N/A	#N/A	#N/A	1	2	#N/A	#N/A	#N/A	#N/A	#N/A	#N/A	#N/A	C5_05390C_A	PGA4	GPI-anchored cell surface protein; beta-1,3-glucanosyltransferase with similarity to the A. fumigatus GEL family; transcript induced in RHE model of oral candidiasis; fluconazol-induced
Q5AK02	#N/A	#N/A	#N/A	#N/A	#N/A	#N/A	#N/A	#N/A	#N/A	#N/A	#N/A	10	C5_05250C_A	C5_05250C_A	Ortholog(s) have structural constituent of ribosome activity and mitochondrial small ribosomal subunit localization
Q5AK59	#N/A	#N/A	#N/A	#N/A	3	#N/A	#N/A	#N/A	#N/A	#N/A	#N/A	#N/A	C5_04750C_A	HAS1	Functional homolog of S. cerevisiae Has1p, which is a nucleolar protein of the DEAD-box ATP-dependent RNA helicase family that is involved in biogenesis of the ribosome, particularly the small (40S) subunit; caspofungin-downregulated
Q5ALV5	12	5	2	14	23	23	#N/A	#N/A	#N/A	#N/A	#N/A	#N/A	C2_01620W_A	COX4	Putative cytochrome c oxidase subunit IV; Mig1-regulated; macrophage/pseudohyphal-induced gene; macrophage-induced protein; repressed by nitric oxide; 5'-UTR intron; Hap43-repressed
Q5ALV6	#N/A	#N/A	#N/A	#N/A	1	#N/A	#N/A	#N/A	#N/A	#N/A	#N/A	#N/A	C2_01610C_A	RPS26A	Ribosomal protein; regulated by Nrg1, Tup1; repressed upon phagocytosis by murine macrophage; alternatively spliced intron in 5'-UTR; Spider biofilm repressed
Q5ALV9	4	3	1	5	10	9	#N/A	#N/A	#N/A	#N/A	#N/A	#N/A	C2_01590W_A	COX13	Cytochrome c oxidase; flucytosine induced; repressed by nitric oxide
Q5ALY0	#N/A	#N/A	#N/A	#N/A	#N/A	#N/A	2	#N/A	2	#N/A	#N/A	#N/A	C2_01410C_A	CLB2	B-type mitotic cyclin (cyclin-dependent protein kinase regulatory subunit); essential; required for wild-type mitotic exit; role in cell polarization; interacts with catalytic subunit Cdk1; Spider biofilm repressed
Q5AMP4	#N/A	#N/A	#N/A	#N/A	2	#N/A	#N/A	#N/A	#N/A	#N/A	#N/A	#N/A	C4_01900C_A	MDH1-1	Predicted malate dehydrogenase precursor; macrophage-induced transcript; protein present in exponential and stationary growth phase yeast cultures; Spider biofilm repressed
Q5AMP8	#N/A	#N/A	#N/A	#N/A	#N/A	#N/A	1	#N/A	#N/A	#N/A	#N/A	1	C4_01940W_A	PHO89	Putative phosphate permease; transcript regulated upon white-opaque switch; alkaline induced by Rim101; possibly adherence-induced; F-12/CO2 model, rat catheter and Spider biofilm induced
Q5AMQ2	1	#N/A	#N/A	#N/A	3	#N/A	#N/A	#N/A	#N/A	#N/A	#N/A	#N/A	C4_01980C_A	CLC1	Clathrin light chain; subunit of the major coat protein involved in intracellular protein transport and endocytosis; rat cathetr and Spider biofilm repressed
Q5AMT7	#N/A	#N/A	#N/A	#N/A	#N/A	1	#N/A	#N/A	#N/A	#N/A	#N/A	#N/A	C4_02270C_A	BFR1	Protein involved in the maintenance of normal ploidy; S. cerevisiae ortholog cofers Brefeldin A resistance; stationary phase enriched protein; Spider biofilm repressed
Q5ANA1	13	7	6	17	30	20	4	#N/A	5	3	3	3	C3_05240C_A	RPL8B	Predicted ribosomal protein; regulated upon yeast-hypha switch; repressed upon phagocytosis by murine macrophage; Spider biofilm repressed
Q5AND0	#N/A	1	#N/A	1	2	3	#N/A	#N/A	#N/A	#N/A	#N/A	#N/A	C3_05030W_A	PHB2	Prohibitin 2; plasma membrane localized
Q5ANE3	1	1	#N/A	#N/A	#N/A	#N/A	#N/A	#N/A	#N/A	#N/A	#N/A	#N/A	C3_04910C_A	NCE102	Non classical protein export protein; localized to plasma membrane; Hap43-induced gene; flow model biofilm induced; Spider biofilm induced
Q5ANI2	4	#N/A	#N/A	#N/A	4	4	#N/A	#N/A	2	#N/A	#N/A	#N/A	C3_04630W_A	C3_04630W_A	Ortholog of C. dubliniensis CD36 : Cd36_84580, C. parapsilosis CDC317 : CPAR2_404290, C. auris B8441 : B9J08_003750 and Candida tenuis NRRL Y-1498 : CANTEDRAFT_115338
Q5ANI8	#N/A	#N/A	#N/A	#N/A	1	1	#N/A	#N/A	#N/A	#N/A	#N/A	#N/A	C3_04560W_A	MAK21	Putative 66S pre-ribosomal particle subunit; mutation confers hypersensitivity to tubercidin (7-deazaadenosine)
Q5ANN9	1	#N/A	#N/A	#N/A	#N/A	#N/A	#N/A	#N/A	#N/A	#N/A	#N/A	#N/A	C3_04180W_A	KRE9	Protein of beta-1,6-glucan biosynthesis; required for serum-induced hyphal growth; required for efficient utilization of galactose and for growth on glucose; similar to S. cerevisiae Kre9p and Knh1p; O-glycosylated by Pmt1p
Q5ANP2	5	#N/A	#N/A	5	7	3	#N/A	#N/A	1	#N/A	#N/A	#N/A	C3_04140C_A	EGD2	Nascent polypeptide associated complex protein alpha subunit; soluble protein in hyphae; macrophage/pseudohyphal-induced; protein level decrease in stationary phase cultures; GlcNAc-induced protein; Spider biofilm repressed
Q5ANP6	#N/A	#N/A	#N/A	#N/A	1	#N/A	#N/A	#N/A	#N/A	#N/A	#N/A	#N/A	C3_04090W_A	SBP1	Similar to RNA binding proteins; downregulated upon adherence to polystyrene; stationary-phase enriched protein
Q5AP79	#N/A	1	#N/A	#N/A	6	5	#N/A	#N/A	#N/A	#N/A	#N/A	#N/A	C1_10160W_A	MIR1	Putative mitochondrial phosphate transporter; caspofungin repressed; expression is increased in a fluconazole-resistant isolate; induced upon adherence to polystyrene
Q5APB5	#N/A	#N/A	#N/A	#N/A	#N/A	#N/A	#N/A	#N/A	#N/A	1	#N/A	#N/A	C1_09850C_A	C1_09850C_A	Ortholog of S. cerevisiae : CUB1, C. dubliniensis CD36 : Cd36_09270, C. parapsilosis CDC317 : CPAR2_803450, C. auris B8441 : B9J08_002739 and Candida tenuis NRRL Y-1498 : CANTEDRAFT_131760
Q5APD0	#N/A	#N/A	#N/A	#N/A	1	#N/A	#N/A	#N/A	#N/A	#N/A	#N/A	#N/A	C1_09710C_A	C1_09710C_A	Ortholog(s) have role in endonucleolytic cleavage in 5'-ETS of tricistronic rRNA transcript (SSU-rRNA, 5.8S rRNA and LSU-rRNA), more
Q5APD4	#N/A	#N/A	#N/A	#N/A	5	#N/A	#N/A	#N/A	#N/A	#N/A	#N/A	#N/A	C1_09680W_A	MTS1	Sphingolipid C9-methyltransferase; catalyzes methylation of the 9th carbon in the long chain base component of glucosylceramides; glucosylceramide biosynthesis is important for virulence; Spider biofilm repressed
Q5APK5	3	4	4	5	14	7	#N/A	#N/A	#N/A	#N/A	#N/A	#N/A	C1_09030C_A	COX5	Cytochrome oxidase subunit V; putative upstream CCAAT box regulatory element; macrophage/pseudohyphal-induced; repressed by nitric oxide; intron in 5'-UTR; Hap43p-dependent repression in low iron medium
Q5APT8	#N/A	1	#N/A	2	3	1	#N/A	#N/A	#N/A	#N/A	#N/A	#N/A	C1_10030W_A	DBP3	Putative ATP-dependent DEAD-box RNA helicase; Hap43-induced; repressed by prostaglandins; Spider biofilm induced
Q8NJN3	#N/A	#N/A	#N/A	#N/A	2	#N/A	#N/A	#N/A	#N/A	#N/A	#N/A	#N/A	C1_04290C_A	ACS2	Acetyl-CoA synthetase; antigenic during human and murine infection; induced by Efg1; macrophage-induced protein; soluble protein in hyphae; gene contains intron; flow model and Spider biofilm repressed
Q8TGH6	#N/A	#N/A	#N/A	#N/A	3	#N/A	#N/A	#N/A	#N/A	#N/A	#N/A	#N/A	C3_06120C_A	GDA1	Golgi membrane GDPase, required for wild-type O-mannosylation, not N-glycosylation; required for wild-type hyphal induction, cell wall, and cell surface charge; not required for HeLa cell adherence; functional homolog of S. cerevisiae Gda1p
Q92206	#N/A	#N/A	#N/A	#N/A	4	#N/A	#N/A	#N/A	#N/A	#N/A	#N/A	#N/A	C1_08590C_A	ERG1	Squalene epoxidase, epoxidation of squalene to 2,3(S)-oxidosqualene; ergosterol biosynthesis; allylamine antifungal drug target; NADH reducing cofactor but S. cerevisiae Erg1 uses NADPH; flow model biofilm induced; Spider biofilm repressed
Q96VB9	#N/A	#N/A	#N/A	#N/A	3	#N/A	#N/A	#N/A	#N/A	#N/A	#N/A	#N/A	C1_06100C_A	MSI3	Essential HSP70 family protein; required for fluconazole resistance and calcineurin-dependent transcription; interacts with Cgr1; transcript regulated by iron; rat catheter biofilm induced; farnesol repressed in biofilm; sumoylation target
Q96W54	1	#N/A	#N/A	6	6	1	#N/A	#N/A	#N/A	#N/A	#N/A	#N/A	C1_06460C_A	RPS22A	Predicted ribosomal protein; repressed upon phagocytosis by murine macrophage; Spider biofilm repressed
Q9P840	16	11	4	12	18	12	#N/A	#N/A	#N/A	#N/A	#N/A	#N/A	C7_00800C_A	YAE1	Ortholog(s) have protein binding, bridging activity, role in protein maturation by [4Fe-4S] cluster transfer and Yae1-Lto1 complex localization
Q9P940	1	#N/A	#N/A	2	6	#N/A	#N/A	#N/A	2	#N/A	#N/A	#N/A	C3_07440W_A	TPI1	Triose-phosphate isomerase; antigenic in mouse/human; mutation affects filamentation; macrophage-repressed; protein in exponential and stationary growth phase yeast; possibly essential; flow model biofilm induced; Spider biofilm repressed
Q9P975	#N/A	#N/A	#N/A	1	2	#N/A	#N/A	#N/A	#N/A	#N/A	#N/A	#N/A	CR_10490W_A	EIF4E	Translation initiation factor eIF4E; genes encoding ribosomal subunits, translation factors, tRNA synthetases downregulated by phagocytosis by macrophage; alternatively spliced intron in 5' UTR; protein levels decrease in stationary phase
Q9URB4	7	#N/A	#N/A	15	10	4	1	#N/A	4	1	1	2	C4_01750C_A	FBA1	Fructose-bisphosphate aldolase; glycolytic enzyme; antigenic in murine/human infection; regulated by yeast-hypha switch; induced by Efg1, Gcn4, Hog1, fluconazole; phagocytosis-repressed; flow model biofilm induced; Spider biofilm repressed
Q9UVJ4	3	1	1	3	4	4	#N/A	#N/A	#N/A	#N/A	#N/A	#N/A	C6_02240C_A	RPL10A	Predicted ribosomal protein; downregulated upon phagocytosis by murine macrophages; Hap43-induced; Spider biofilm repressed
Q9UVL1	2	#N/A	#N/A	5	8	#N/A	#N/A	#N/A	1	#N/A	#N/A	#N/A	C4_01700C_A	NHP6A	Putative non-histone chromatin component; RNA abundance regulated by tyrosol,cell density; Hap43-induced; amphotericin B, caspofungin repressed; 5'-UTR intron; rat catheter and Spider biofilm repressed
Q9UW19	#N/A	#N/A	#N/A	#N/A	#N/A	#N/A	3	#N/A	#N/A	#N/A	2	#N/A	C5_01755C_B	MTLALPHA1	Master regulator (activator) of alpha mating type; gene of the MTLalpha (Mating Type Like) locus; ortholog of S. cerevisiae Alpha1p; a/alpha mating type may increase virulence, offers competitive advantage
Q9Y7F0	2	#N/A	#N/A	5	5	#N/A	#N/A	#N/A	1	#N/A	#N/A	#N/A	C3_06180C_A	TSA1	TSA/alkyl hydroperoxide peroxidase C (AhPC) family protein; similar to thiol-dependent peroxidases of oxidative stress signaling; antigenic; hyphal surface, nucleus; yeast-form nucleus, cytoplasm; biofilm, phagocytosis, peroxide induced
