# Supplementary material for: The RSC (Remodels the Structure of Chromatin) complex of Candida albicans shows compositional divergence with distinct roles in regulating pathogenic traits
Source: PLoS Genet. 2020 Nov 5;16(11):e1009071. doi: 10.1371/journal.pgen.1009071 (PMC7671503; doi:10.1371/journal.pgen.1009071)
Supplement: S3 Table — (XLSX) [file pgen.1009071.s012.xlsx]

## Sheet: S3 Table-sth1 RNA-Seq
Systematic Gene Name	Log2ratio sth1/pTetO-STH1-MYC (+Dox/-Dox)	FDR	Standard Gene Name	Description
C3_02490C_A	-5.19723	6.8258e-06		Protein of unknown function; transcript detected on high-resolution tiling arrays
C2_03210W_A	-2.95542	8.63423e-05	RIM8	Beta-arrestin-like protein; involved in pH response; required for pathogenesis, activation of Rim101 and alkaline pH-induced hyphal growth; colony morphology-related gene regulation by Ssn6p negative feedback regulation target
C2_04180C_A	-2.2027	0.000847471		Putative nucleolar protein with a predicted role in pre-rRNA processing and ribosome biogenesis; repressed by nitric oxide; required for flow model biofilm formation; Spider biofilm repressed
C4_03960W_A	-2.17462	0.00317669	RPL16A	Ribosomal protein; transposon mutation affects filamentous growth; repressed upon phagocytosis by murine macrophages; Hap43-induced; Spider biofilm repressed
C5_03940C_A	-2.16526	0.00190592		Ortholog(s) have cargo adaptor activity, role in intracellular protein transport, retrograde transport, endosome to Golgi and endosome, retromer complex, retromer, cargo-selective complex localization
CR_03010C_A	-2.15548	0.00729213	CDC13	Essential protein with similarity to S. cerevisiae Cdc13p, involved in telomere maintenance
C6_04450W_A	-2.1295	0.0011798	NAA25	Ortholog(s) have peptide alpha-N-acetyltransferase activity and role in N-terminal peptidyl-methionine acetylation, cytoskeleton organization, mitochondrion inheritance, regulation of actin cytoskeleton organization
C3_00200C_A	-2.08501	0.000664056		Ortholog(s) have role in N-acylethanolamine metabolic process, N-acylphosphatidylethanolamine metabolic process and integral component of mitochondrial inner membrane localization
C2_01040W_A	-2.08137	0.0042666	TTR1	Putative glutaredoxin; described as a glutathione reductase; induced by human neutrophils and benomyl treatment; alkaline repressed; regulated by Gcn2 and Gcn4; required for virulence in mouse model; Spider biofilm induced
C3_02620C_A	-2.07235	0.0302068		Ortholog(s) have 3-methyl-2-oxobutanoate hydroxymethyltransferase activity, role in pantothenate biosynthetic process and mitochondrion localization
CR_05340C_A	-2.04094	0.0235313		Ortholog(s) have phosphatase activity and role in dephosphorylation
C1_08060W_A	-1.99331	0.0138858		Ortholog of C. dubliniensis CD36 : Cd36_00460, C. parapsilosis CDC317 : CPAR2_800010, Candida tenuis NRRL Y-1498 : CANTEDRAFT_125085 and Debaryomyces hansenii CBS767 : DEHA2D09086g
C7_00580C_A	-1.96462	0.00182969		Protein with a Bul1 domain; binds the ubiquitin ligase Rsp5 and is involved in intracellular trafficking of a general amino acid permease Gap1; repressed in an azole-resistant strain overexpressing MDR1; Spider biofilm induced
C3_01910C_A	-1.92294	0.00296774	CIS2	Putative role in regulation of biogenesis of the cell wall; upregulated in biofilm; Gcn4p-regulated
C6_01840C_A	-1.88316	0.000299294	CNS1	Putative co-chaperone; Hap43p-induced gene; mutation confers hypersensitivity to radicicol
C4_03680C_A	-1.81428	0.00891532		Protein of unknown function; Spider biofilm induced
C2_00160C_A	-1.81263	0.00229071	ROT1	Similar to S. cerevisiae Rot1p, which is involved in cell wall 1,6-beta-glucan biosynthesis; has predicted transmembrane region; possibly an essential gene, disruptants not obtained by UAU1 method
C7_01850C_A	-1.81263	0.00276273		Ortholog(s) have Atg8 ligase activity
C1_02330C_A	-1.8094	0.0235623	GEM1	Putative outer mitochondrial membrane GTPase, subunit of the ERMES complex; required for mitochondrial morphology and invasive growth
C3_05070W_A	-1.7922	0.00276273		Ortholog(s) have structural constituent of ribosome activity and mitochondrial small ribosomal subunit localization
C2_02620W_A	-1.74648	0.00237278		Putative type-1 protein phosphatase targeting subunit; transcript repressed by yeast-hyphal switch; transcript induced by Mnl1p under weak acid stress; flow model biofilm induced
C3_07490W_A	-1.73417	0.00181512	ZCF17	Putative Zn(II)2Cys6 transcription factor
C6_04260C_A	-1.72126	0.00143143		Flavin-containing monooxygenase; catalyzes oxidation of biological thiols to maintain the ER redox buffer ratio for correct folding of disulfide-bonded proteins; Spider biofilm repressed
C7_00300W_A	-1.72016	0.000397903	STB5	Putative transcription factor with zinc cluster DNA-binding motif; hyperactive mutation causes YOR1 overexpression and resistance to beauvericin; Hap43p-repressed gene
C1_08780W_A	-1.69135	0.00143143	IFD3	Putative aldo/keto reductase; Mig1-regulated
C5_01785W_B	-1.67872	0.0028002		Putative glycogen synthesis initiator; regulated by Efg1 and Efh1; Hog1-repressed; colony morphology-related gene regulation by Ssn6; induced by prostaglandins; flow model biofilm induced
C5_03100C_A	-1.66403	0.00927158	RPS21B	Ribosomal protein S21; regulated by Nrg1, Tup1; colony morphology-related gene regulation by Ssn6; positively regulated by Tbf1, Hap43; Spider biofilm repressed
C7_01750W_A	-1.65054	0.00261198	POX18	Similar to Pox18, a peroxisomal protein; induced during chlamydospore formation in C. albicans and C. dubliniensis; A21 sequence updated based on new sequence and analysis, the allelic orf19.10841 was reinstated; Spider biofilm induced
CR_01800C_A	-1.6302	0.0037763		Ortholog of Bre4 in S. cerevisiae has a role in brefeldin A resistence; a drug that affect intracellular transport; Spider biofilm induced
C4_00580W_A	-1.62369	0.00296774	RPS21	Protein component of the small (40S) subunit; repressed upon phagocytosis by murine macrophage; positively regulated by Tbf1; Spider biofilm repressed
C2_01440C_A	-1.61769	0.00237278		Plasma membrane protein of unknown function; colony morphology-related gene regulation by Ssn6; repressed by nitric oxide
CR_10040W_A	-1.61752	0.0142808		Ortholog(s) have role in positive regulation of protein autoubiquitination, protein deubiquitination
C2_03470C_A	-1.61574	0.00560908		Protein similar to a mitochondrial complex I intermediate-associated protein; fluconazole-repressed; Spider biofilm induced; rat catheter biofilm repressed
CR_03490W_A	-1.61003	0.00396424	ARP8	Putative chromatin-remodeling enzyme complex protein; mutation confers hypersensitivity to toxic ergosterol analog, and to amphotericin B; rat catheter biofilm induced
CR_02020C_A	-1.60974	0.00943054		Predicted MFS membrane transporter, member of the drug:proton antiporter (12 spanner) (DHA1) family; flow model biofilm induced
C2_03260W_A	-1.59173	0.00467287	HOL4	Putative ion transporter; alkaline induced by Rim101; Plc1-regulated; caspofungin repressed; rat catheter and Spider biofilm induced
C1_11210C_A	-1.58815	0.000299294	SWI4	Putative component of the SBF transcription complex involved in G1/S cell-cycle progression; periodic mRNA expression, peak at cell-cycle G1/S phase; predicted, conserved MBF binding sites upstream of G1/S-regulated genes
C1_01200W_A	-1.58219	0.00143143	UGA2	Predicted succinate semialdehyde dehydrogenase; predicted role in glutamate catabolism; transcription regulated by Mig1, Tup1, Gcn4; mutants are viable
C1_13920W_A	-1.57982	0.00229071	PTR3	Protein similar to S. cerevisiae Ptr3p, which is a sensor of external amino acids; expression upregulated in an ssr1 null mutant
C4_04090C_A	-1.57833	0.000397903		Predicted plasma membrane protein; gene has intron
C4_06950W_A	-1.57807	0.00451449	HSP31	Putative 30 kda heat shock protein; repressed during the mating process; rat catheter biofilm induced
C1_07570C_A	-1.57335	0.00962466		Ribosomal 60S subunit protein; Spider biofilm repressed
C4_01840C_A	-1.57099	1.53487e-05	TIM21	Component of the Translocase of the Inner Mitochondrial membrane (TIM23 complex); for protein import into mitochondria; Hap43, ketoconazole-repressed; Spider biofilm repressed
C6_00980C_A	-1.56872	0.00550159	PGA5	Putative GPI-anchored beta-1,3-glucanosyltransferase with similarity to the A. fumigatus GEL family; fungal-specific (no human or murine homolog)
C3_00210C_A	-1.56573	0.0236781		Ortholog(s) have role in protein folding, tubulin complex assembly
CR_00160C_A	-1.56557	0.00110796		Putative mitochondrial inner membrane protein with a predicted role in the assembly of respiratory complex III; Hap43p-repressed gene; S. cerevisiae ortholog FMP25 localizes to mitochondrion
C4_02760C_A	-1.565	0.00317669		Putative v-SNARE of the endoplasmic reticulum membrane; possibly an essential gene, disruptants not obtained by UAU1 method
C1_05160C_A	-1.55232	0.0466854		Protein of unknown function; Hap43-repressed gene; repressed by nitric oxide
C1_08430W_A	-1.52516	0.012977	MNN44	Planktonic growth-induced gene
C6_00390W_A	-1.52475	0.00650877		Predicted ORF from Assembly 19; removed from Assembly 20; subsequently reinstated in Assembly 21 based on comparative genome analysis
CR_04400W_A	-1.52349	0.0260477		Ortholog(s) have DNA translocase activity
C7_03280C_A	-1.52242	0.0235758		Putative guanyl-nucleotide exchange factor; Spider biofilm repressed
C5_03240W_A	-1.52118	0.0239535		Protein of unknown function; similar to human SERF2; gene has an alternatively spliced intron
C7_02290W_A	-1.51471	0.0224661		Predicted dienelactone hydrolase domain; clade-associated gene expression; farnesol-downregulated; rat catheter biofilm repressed
C4_02100C_A	-1.51335	0.0139789		Protein of unknown function; Hap43-repressed gene
C1_10930C_A	-1.50601	0.0113347	CDC73	Putative transcription elongation factor; cdc73 kap114 double transposon mutation affects filamentous growth; Spider biofilm repressed
CR_03730C_A	-1.50115	0.00878339	XOG1	Exo-1,3-beta-glucanase; 5 glycosyl hydrolase family member; affects sensitivity to chitin and glucan synthesis inhibitors; not required for yeast-to-hypha transition or for virulence in mice; Hap43-induced; Spider biofilm induced
C2_09710C_A	-1.50082	0.0245289	HOL1	Putative MFS transporter; regulated by Nrg1; macrophage/pseudohyphal-repressed; induced by alpha pheromone in SpiderM medium; possibly an essential gene, disruptants not obtained by UAU1 method
C2_01430W_A	-1.49156	0.000299294	RPP1A	Conserved acidic ribosomal protein; likely role in regulation of translation elongation; interacts with Rpp2B; 1 of 4 similar C. albicans ribosomal proteins (Rpp1A, Rpp1Bp, Rpp2A, Rpp2B); Hap43-induced; Spider biofilm repressed
CR_05040W_A	-1.48323	0.00324486	RPL13	Putative ribosomal subunit; antigenic during murine infection; downregulated upon phagocytosis by murine macrophage; Spider biofilm repressed
C4_01170C_A	-1.48256	0.0206728		Protein of unknown function; induced by nitric oxide; rat catheter and Spider biofilm induced
C1_03070C_A	-1.47864	0.000397903	ORC1	Putative origin recognition complex large subunit; essential for viability; similar to S. cerevisiae Orc1p origin recognition complex subunit
C4_04250W_A	-1.47754	0.00324486	RPL6	Ortholog of S. cerevisiae ribosomal subunit, Rpl6B; transposon mutation affects filamentous growth; translation-related genes are downregulated upon phagocytosis by murine macrophage; Hap43-induced; Spider biofilm repressed
C4_06120W_A	-1.47523	0.00488047	GGA2	Protein involved in Golgi trafficking; rat catheter and Spider biofilm repressed
C4_00060W_A	-1.47387	0.0113115		Ortholog(s) have role in endosome organization, regulation of protein localization and BLOC-1 complex localization
C7_01190W_A	-1.46786	0.0037763		Putative lipoyl ligase; role in modification of mitochondrial enzymes by attachment of lipoic acid groups; rat catheter biofilm induced
C3_00260C_A	-1.46326	0.00324486	CDC12	Septin; essential for viability; forms ring at sites of cell division and also forms filaments in mature chlamydospore; filamentous growth induced; regulated by Nrg1, Tup1, tyrosol and cell density; rat catheter biofilm repressed
C1_09720W_A	-1.45782	0.012977		Ortholog of C. dubliniensis CD36 : Cd36_03040, C. parapsilosis CDC317 : CPAR2_108610, C. auris B8441 : B9J08_000283, Debaryomyces hansenii CBS767 : DEHA2G16500g and Pichia stipitis Pignal : PICST_32835
C7_01690W_A	-1.45346	0.0437867	NGG1	Ortholog(s) have histone acetyltransferase activity and role in chromatin organization, histone acetylation, regulation of transcription by RNA polymerase II
C2_02930C_A	-1.44492	0.022483	SEC62	Putative endoplasmic reticulum (ER) protein-translocation complex subunit
C1_07180W_A	-1.43075	0.00181512	TPS2	Trehalose-6-phosphate (Tre6P) phosphatase; mutant heat sensitive, accumulates Tre6P, decreased mouse virulence; possible drug target; 2 conserved phospohydrolase motifs; no mammalian homolog; Hap43-repressed; flow model biofilm induced
C4_06270C_A	-1.42827	0.00624636		Ortholog(s) have ubiquitin protein ligase binding activity
C2_10450W_A	-1.42701	0.0392749		Protein kinase-related protein, required for normal sensitivity to caspofungin
C5_03280W_A	-1.41473	0.0175671		Protein of unknown function; repressed by alpha pheromone in SpiderM medium
C7_00450C_A	-1.41341	0.00263815		Ortholog(s) have role in ascospore formation, ascospore wall assembly, ascospore-type prospore membrane assembly and protein localization to cell division site, more
C2_01090C_A	-1.40714	0.0139789	COQ6	Ortholog(s) have oxidoreductase activity, acting on paired donors, with incorporation or reduction of molecular oxygen, reduced flavin or flavoprotein as one donor, and incorporation of one atom of oxygen activity
C4_06940C_A	-1.39975	0.00353936		Ortholog(s) have role in chromatin remodeling and ASTRA complex, TORC2 complex localization
C1_05860W_A	-1.39376	0.0109062		Ortholog of C. parapsilosis CDC317 : CPAR2_108915, C. auris B8441 : B9J08_004667, Candida tenuis NRRL Y-1498 : CANTEDRAFT_102387 and Debaryomyces hansenii CBS767 : DEHA2B06776g
C7_04170W_A	-1.39234	0.0108208		Ortholog(s) have protein-containing complex binding activity, role in endoplasmic reticulum to Golgi vesicle-mediated transport, protein secretion and Golgi membrane, cis-Golgi network, cytoplasm localization
C4_02200C_A	-1.39026	0.0126898		Ortholog of C. dubliniensis CD36 : Cd36_03580, C. parapsilosis CDC317 : CPAR2_105090, C. auris B8441 : B9J08_004984 and Candida tenuis NRRL Y-1498 : CANTEDRAFT_106351
CR_07790C_A	-1.37694	0.0128651		Predicted heme-binding stress-related protein; Tn mutation affects filamentous growth; induced during chlamydospore formation in C. albicans and C. dubliniensis; Spider biofilm induced
CR_03050C_A	-1.37385	0.00143143		Ortholog(s) have proteasome binding activity and role in cellular response to arsenic-containing substance, proteasome-mediated ubiquitin-dependent protein catabolic process
C1_02350W_A	-1.37326	0.0358157		Protein with a NADP-dependent oxidoreductase domain; transcript induced by ketoconazole; rat catheter and Spider biofilm induced
C1_10920W_A	-1.36881	0.00181512	CSH1	Aldo-keto reductase; role in fibronectin adhesion, cell surface hydrophobicity; regulated by temperature, growth phase, benomyl, macrophage interaction; azole resistance associated; Spider biofilm induced; rat catheter biofilm repressed
C1_05820C_A	-1.36869	0.00456264	POR1	Mitochondrial outer membrane porin; in detergent-resistant membrane fraction (possible lipid raft component); antigenic in human, mouse; Hap43p-induced; flucytosine-, macrophage-, farnesol- induced; fluconazole, caspofungin repressed
C2_04260W_A	-1.36735	0.00650877	URA6	Ortholog(s) have adenylate kinase activity, uridylate kinase activity, role in 'de novo' pyrimidine nucleobase biosynthetic process, nucleobase-containing compound metabolic process and cytoplasm, nucleus localization
CR_08360C_A	-1.3667	0.00677289		Protein of unknown function; transcript detected in high-resolution tiling arrays; transcription induced by alpha pheromone in SpiderM medium; Spider and early-stage flow model biofilm induced
C7_00170W_A	-1.36571	0.00466227		Ortholog(s) have role in CENP-A containing nucleosome assembly, chromatin maintenance and nucleoplasm localization
C1_12880C_A	-1.36417	0.00911521		Putative transcription factor with C3HC4 zinc finger DNA-binding motif; mutants are viable
C4_04390W_A	-1.35717	0.00456688	IFE1	Putative medium-chain alcohol dehydrogenase; rat catheter and Spider biofilm repressed
C3_07050W_A	-1.35501	0.00336065	ERG3	C-5 sterol desaturase; introduces C-5(6) double bond into episterol; some clinical isolates show increased azole resistance and defects in hyphal growth and virulence; Efg1p-repressed; fluconazole-induced
C2_05870W_A	-1.35412	0.00554789		Ortholog of C. parapsilosis CDC317 : CPAR2_105580, C. dubliniensis CD36 : Cd36_04550, Lodderomyces elongisporus NRLL YB-4239 : LELG_03202 and Candida metapsilosis : CMET_5254
C3_02400C_A	-1.34049	0.0386954	SAP7	Pepstatin A-insensitive secreted aspartyl protease; self-processing; expressed in human oral infection; Ssn6p-regulated; role in murine intravenous infection; induced during, but not required for, murine vaginal infection; N-glycosylated
CR_02070C_A	-1.33738	0.00482049	MNN15	Putative alpha-1,3-mannosyltransferase; predicted role in protein O-linked glycosylation; Spider biofilm induced
C1_05770C_A	-1.33536	0.000458056		Has domain(s) with predicted methyltransferase activity and role in metabolic process
C2_02860W_A	-1.33452	0.021525		Ortholog of C. dubliniensis CD36 : Cd36_04660, Candida tropicalis NEW ASSEMBLY : CTRG1_04484, Candida tropicalis MYA-3404 : CTRG_04484 and Candida albicans WO-1 : CAWG_00904
CR_01850C_A	-1.32838	0.0457922		Protein of unknown function; exogenously expressed protein is a substrate for Kex2p processing in vitro
C1_09260C_A	-1.31906	0.00276273	RHD1	Putative beta-mannosyltransferase required for the addition of beta-mannose to the acid-labile fraction of cell wall phosphopeptidomannan; 9-gene family memebr; regulated on yeast-hypha and white-opaque switches; Spider biofilm repressed
C1_01240W_A	-1.31893	0.00335939	TRY2	Transcription factor; regulator of yeast form adherence; required for yeast cell adherence to silicone substrate; Spider biofilm induced
C1_07900W_A	-1.31714	0.0254603	BRG1	Transcription factor; recruits Hda1 to hypha-specific promoters; Tn mutation affects filamentation; Hap43-repressed; Spider and flow model biofilm induced; required for Spider biofilm formation; Bcr1-repressed in RPMI a/a biofilms
C2_05440W_A	-1.31538	0.0113115		Putative phosphatidyl synthase; stationary phase enriched protein; transcript repressed by yeast-hypha switch; Hap43-repressed; rat catheter, Spider and flow model biofilm induced
CR_00360C_A	-1.31427	0.000397903		Protein of unknown function; constitutive expression independent of MTL or white-opaque status; upregulated in a cyr1 mutant
C3_01490W_A	-1.3105	0.00665385	RPT1	Putative 26S proteasome regulatory subunit 7; Hap43p-repressed gene; regulated by Gcn2p and Gcn4p; overlaps orf19.442
C1_02380C_A	-1.30974	0.00908535		Putative non-canonical poly(A) polymerase; repressed by nitric oxide; Spider biofilm induced
C4_03700W_A	-1.30728	0.00237278		Ortholog(s) have telomeric DNA binding activity
C3_07040C_A	-1.29971	0.00143143		Ortholog(s) have mitochondrial large ribosomal subunit localization
C2_05560W_A	-1.29714	0.00182969	TRP99	Putative thioredoxin peroxidase/alkyl hydroperoxide reductase; induced in low iron; regulated by Gcn4; induced in response to amino acid starvation (3-AT treatment)
C3_05240C_A	-1.29468	0.0106055	MTM1	Ortholog(s) have pyridoxal phosphate binding activity, role in cellular iron ion homeostasis, pyridoxal phosphate transport and mitochondrion localization
C1_09960W_A	-1.29451	0.00237278	RSM22	Predicted mitochondrial small ribosomal subunit; rat catheter and Spider biofilm induced
C4_00390W_A	-1.2929	0.00296774	RPS27A	Ribosomal protein S27; rat catheter and Spider biofilm induced
C2_05820W_A	-1.29132	0.0110951	SSH1	Protein with a role in protein translocation across membranes
C4_02880C_A	-1.29132	0.00296774		Protein similar to GTPase regulators; induced in low iron; transcript activated by Mnl1 under weak acid stress; Hap43-, Sfu1- and Sef1-regulated; flow model biofilm induced, Spider biofilm induced
C4_01370W_A	-1.29034	0.00276273	RIB4	Lumazine synthase (6,7-dimethyl-8-ribityllumazine synthase, DMRL synthase); catalyzes the penultimate step in the synthesis of riboflavin; Hap43-induced; rat catheter and Spider biofilm repressed
C6_04480C_A	-1.28901	0.00845259		Ortholog(s) have glutaminyl-tRNA synthase (glutamine-hydrolyzing) activity, role in glutaminyl-tRNAGln biosynthesis via transamidation, mitochondrial translation and glutamyl-tRNA(Gln) amidotransferase complex, mitochondrion localization
C1_06900C_A	-1.27952	0.00430105	STE3	Protein similar to S. cerevisiae Ste3p, the receptor for a-factor mating pheromone; alpha mating-type-specific transcription
CR_08690C_A	-1.27628	0.0302745		Has domain(s) with predicted peptidase activity and role in proteolysis
C1_10560C_A	-1.27433	0.00827673		60S ribosomal protein L7; snoRNA snR39b encoded within the 2nd intron
CR_04480C_A	-1.27372	0.00777489		Ortholog of C. dubliniensis CD36 : Cd36_05410, C. parapsilosis CDC317 : CPAR2_107480, C. auris B8441 : B9J08_004575 and Candida tenuis NRRL Y-1498 : CANTEDRAFT_94695
C4_04280C_A	-1.27359	0.00550159		Ortholog(s) have histone demethylase activity (H3-trimethyl-K4 specific) activity
C2_06640C_A	-1.27056	0.0168477	PGA26	GPI-anchored adhesin-like protein of the cell wall; role in cell wall integrity; required for normal virulence; induced in high iron and during cell wall regeneration; Hap43-repressed
CR_04410W_A	-1.26564	0.0243423	PRC3	Putative carboxypeptidase Y precursor; transcript regulated by Nrg1 and Mig1; regulated by Gcn2 and Gcn4
C1_03840W_A	-1.26554	0.0296447	RAD10	Ortholog of S. cerevisiae Rad10, an endonuclease involved in nucleotide excision repair; mutant is extremely sensitive to UV irradiation; transcript repressed in alkaline conditions
C1_13990W_A	-1.2631	0.0134418	PRN2	Protein similar to pirin; Hap43p-repressed gene
C2_01580W_A	-1.26109	0.00514129	PHO87	Putative phosphate permease; transcript repressed by Rim101 at pH 8; regulated by white-opaque switch; caspofungin repressed; virulence-group-correlated expression; flow model biofilm induced
C1_11100W_A	-1.25738	0.00237278		Putative adhesin-like protein; macrophage-induced gene
C5_01890W_A	-1.25597	0.00667762		Has domain(s) with predicted 2-dehydropantoate 2-reductase activity, NADP binding, coenzyme binding, oxidoreductase activity, oxidoreductase activity, acting on the CH-OH group of donors, NAD or NADP as acceptor activity
CR_07340C_A	-1.25277	0.00326548		Putative dicarboxylic amino acid permease; fungal-specific (no human or murine homolog); induced by alpha pheromone in SpiderM medium
C7_02080W_A	-1.24808	0.00409372	HAC1	bZIP transcription factor; role in unfolded protein response and control of morphology; transcript undergoes atypical splicing at C terminus under ER stress; induced during mating and by caspofungin; mRNA binds She3; Spider biofilm induced
C6_03700W_A	-1.23703	0.00802916		Ortholog(s) have protein serine/threonine kinase activity, ribosomal protein S6 kinase activity, role in TORC1 signaling, peptidyl-serine phosphorylation, protein autophosphorylation and cytoplasm localization
C5_02580W_A	-1.23422	0.0394034	RPS14B	Putative ribosomal protein; repressed upon phagocytosis by murine macrophage; transcript positively regulated by Tbf1; Spider biofilm repressed
C3_01220W_A	-1.23212	0.0346788	GLT1	Putative glutamate synthase; regulated by Sef1, Sfu1, and Hap43; rat catheter biofilm repressed
CR_02430C_A	-1.2316	0.00299525		Putative protein of unknown function; Hap43p-repressed gene
C3_04960W_A	-1.22822	0.0412277	RPS23A	Putative ribosomal protein; repressed upon phagocytosis by murine macrophage; Spider biofilm repressed
C1_00380C_A	-1.22723	0.00905016	HAK1	Putative potassium transporter; similar to Schwanniomyces occidentalis Hak1p; amphotericin B induced; induced upon phagocytosis by macrophage; Hap43-repressed; rat catheter biofilm repressed
C4_04920W_A	-1.22717	0.00143143		Ortholog(s) have protein transmembrane transporter activity and role in mitochondrial outer membrane translocase complex assembly, protein targeting to mitochondrion
C5_03680W_A	-1.22116	0.0100577	NAA20	Ortholog(s) have peptide alpha-N-acetyltransferase activity and role in N-terminal peptidyl-methionine acetylation, mitochondrion inheritance, regulation of actin cytoskeleton organization, ubiquitin-dependent ERAD pathway
CR_04150W_A	-1.21807	0.0141166	NOP6	Putative ortholog of S. cerevisiae Nop6; role in ribosomal small subunit biogenesis; Spider biofilm induced
CR_00820C_A	-1.21542	0.00601485	PCL7	Putative cyclin-like protein; possible Pho85 cyclin; hyphal repressed; induced by Mnl1 under weak acid stress
C1_03010W_A	-1.21454	0.0144427	SPO22	Ortholog(s) have role in positive regulation of protein sumoylation, regulation of synaptonemal complex assembly and condensed nuclear chromosome localization
C7_02390W_A	-1.21238	0.00296781	MMD1	Mitochondrial protein; possibly required for transamination of isoleucine; macrophage-downregulated protein abundance; rat catheter and Spider biofilm repressed
C6_01830W_A	-1.20553	0.000299294		Ortholog of C. dubliniensis CD36 : Cd36_06470, C. parapsilosis CDC317 : CPAR2_208960, Candida tenuis NRRL Y-1498 : CANTEDRAFT_114040 and Pichia stipitis Pignal : PICST_51125
C1_10690W_A	-1.2054	0.00110293	PGA63	Component COPII vesicle coat; required for vesicle formation in ER to Golgi transport; predicted GPI-anchor; flow model and Spider biofilm repressed
C1_03140W_A	-1.20419	0.00554789		Component of the SWI/SNF and RSC chromatin remodeling complexes; suggested role in chromosome maintenance; Spider biofilm induced
CR_03110W_A	-1.19944	0.0082442	CCS1	Copper chaperone involved in activation and protection of superoxide dismutase Sod1p
C6_00830C_A	-1.19892	0.0115919	YPD1	Phosphohistidine intermediate protein in a phosphorelay signal transduction pathway; residue His69 is the phosphoacceptor histidine; predicted to be soluble and cytosolic; functional homolog of S. cerevisiae Ypd1p
C1_11580W_A	-1.19624	0.0170375	PHO100	Putative inducible acid phosphatase; DTT-extractable and observed in culture supernatant in low-phosphate conditions; slight effect on murine virulence; virulence-group-correlated expression; N-glycosylated; F-12/CO2 early biofilm induced
C2_08060W_A	-1.19363	0.00397426		Has domain(s) with predicted ATP binding, DNA binding, helicase activity, hydrolase activity, nucleic acid binding activity
C3_06410C_A	-1.19256	0.00188378		Ortholog(s) have DNA-directed DNA polymerase activity, role in DNA replication initiation, telomere capping and alpha DNA polymerase:primase complex, nuclear envelope, nucleus localization
CR_00200W_A	-1.18669	0.0437183		Has domain(s) with predicted RNA binding, pseudouridine synthase activity and role in pseudouridine synthesis
C2_03700W_A	-1.18551	0.00654267	PIR32	Cell wall protein, putative structural component of the cell wall; mutation leads to increased chitin content, increased virulence and resistance to stresses; macrophage-induced gene
C3_04810C_A	-1.18341	0.00340813		Ortholog of S. cerevisiae : YFR045W, C. glabrata CBS138 : CAGL0C02013g, C. dubliniensis CD36 : Cd36_07340, C. parapsilosis CDC317 : CPAR2_208340 and C. auris B8441 : B9J08_001600
C6_02800W_A	-1.1829	0.00492948		Ortholog of C. dubliniensis CD36 : Cd36_07380 and Candida albicans WO-1 : CAWG_00634
C6_04220C_A	-1.18238	0.00585331	COI1	Secreted protein; ciclopirox olamine induced; regulated by Ssn6; induced by nitric oxide independent of Yhb1; Hap43-induced; Spider biofilm repressed
CR_08520C_A	-1.18233	0.00488047		Ortholog of C. dubliniensis CD36 : Cd36_07450, C. parapsilosis CDC317 : CPAR2_208450, Candida tenuis NRRL Y-1498 : CANTEDRAFT_116488 and Debaryomyces hansenii CBS767 : DEHA2F26114g
C3_02470C_A	-1.18085	0.00910945	OFR1	Protein involved in regulation of white-opaque switching; Hap43-repressed gene; rat catheter biofilm repressed
C6_03270C_A	-1.1762	0.0112449	DRG1	Member of the DRG family of GTP-binding proteins; involved in regulation of invasive filamentous growth
CR_06340C_A	-1.17508	0.0445648		Ortholog(s) have tRNA-specific adenosine deaminase activity, tRNA-specific adenosine-34 deaminase activity, role in tRNA modification, tRNA wobble adenosine to inosine editing and tRNA-specific adenosine-34 deaminase complex localization
C4_04130W_A	-1.17496	0.00554789		Putative oxysterol-binding protein; caspofungin induced; possibly an essential gene, disruptants not obtained by UAU1 method
C1_11320C_A	-1.16572	0.0137383	CAF16	ABC family protein, predicted not to be a transporter; Hap43, caspofungin repressed; rat catheter and Spider biofilm repressed
C1_01780C_A	-1.16453	0.0452901		Protein of unknown function; Hap43-induced gene
C3_02180C_A	-1.16417	0.0106055		Putative kynureninase; predicted role in NAD biosynthesis; Hap43-repressed gene; flow model biofilm induced
C2_09400C_A	-1.15951	0.00911951		Ortholog(s) have RNA binding activity, role in spliceosomal complex assembly and U2-type prespliceosome localization
C3_01280W_A	-1.15916	0.00276273		Ortholog of S. cerevisiae : YNL050C, C. glabrata CBS138 : CAGL0G01276g, C. dubliniensis CD36 : Cd36_08220, C. parapsilosis CDC317 : CPAR2_804440 and C. auris B8441 : B9J08_004556
C4_02580W_A	-1.15327	0.0198216	SEC24	Protein with a possible role in ER to Golgi transport; induced upon yeast-hyphal switch; sumoylation target; Spider biofilm repressed
C4_04160W_A	-1.15203	0.021525	YMC2	Putative mitochondrial carrier protein; Gcn4-regulated; F-12/ CO2 early biofilm induced; Spider biofilm induced
C1_02920W_A	-1.14657	0.00219799		Protein of unknown function; Hap43-repressed
C4_03400W_A	-1.14588	0.00194192		Ortholog(s) have alkaline phosphatase activity, zinc ion sensor activity, role in nicotinamide nucleotide metabolic process, protein dephosphorylation and extracellular region, fungal-type vacuole membrane localization
C4_06050W_A	-1.14222	0.00336195	AFG1	Putative mitochondrial ATPase of the AAA family; similar but not orthologous to S. cerevisiae Afg1; mutant is viable; regulated by Sef1, Sfu1, and Hap43
C3_06490W_A	-1.13767	0.0250535	COX5	Cytochrome oxidase subunit V; putative upstream CCAAT box regulatory element; macrophage/pseudohyphal-induced; repressed by nitric oxide; intron in 5'-UTR; Hap43p-dependent repression in low iron medium
CR_10500C_A	-1.136	0.00295471		Putative transporter; slightly similar to the Sit1p siderophore transporter; Gcn4p-regulated; fungal-specific; induced by Mnl1p under weak acid stress
C6_01820C_A	-1.13546	0.00609351	GRP1	Protein similar to dihydroflavonol-4-reductases
C3_02920W_A	-1.13444	0.0051149	PTC1	Putative protein phosphatase of the Type 2C-related family (serine/threonine-specific), similar to S. cerevisiae Ptc1p; mutant shows virulence defect
C3_01210C_A	-1.1294	0.00276273	FGR43	Protein lacking an S. cerevisiae ortholog; transposon mutation affects filamentous growth; induced by by Mnl1 under weak acid stress
C7_02970W_A	-1.12924	0.000847471		Putative membrane protein; induced by alpha pheromone in SpiderM medium; Hap4-induced gene; Spider biofilm induced
CR_07570W_A	-1.12819	0.0141166		Putative tricarboxylate carrier family protein; localized to the mitochondrial membrane
C1_02780W_A	-1.12705	0.00237278	PPT2	Phosphopantetheinyl transferase (PPTase); Spider biofilm induced
CR_07870W_A	-1.12498	0.00343859		Protein of unknown function; induced by nitric oxide
C1_11480W_A	-1.12455	0.0224661	LIP1	Secreted lipase, member of a lipase gene family whose members are expressed differentially in response to carbon source and during infection; may have a role in nutrition and/or in creating an acidic microenvironment
C4_01970W_A	-1.12324	0.0120369	LIP10	Secreted lipase, member of a lipase gene family whose members are expressed differentially in response to carbon source and during infection; may have a role in nutrition and/or in creating an acidic microenvironment
CR_03000C_A	-1.12214	0.011708		Mitochondrial matrix protein; required for assembly/stability of the F1 sector of mitochondrial F1F0 ATP synthase at high temperature; rat catheter biofilm repressed
C1_12240C_A	-1.11768	0.00482049	IDH1	Putative mitochondrial NAD-isocitrate dehydrogenase subunit 1; soluble protein in hyphae; protein level decrease in stationary phase cultures
C2_02900W_A	-1.11472	0.0202027	ADE12	Adenylosuccinate synthase; upregulated in biofilm; decreased expression in hyphae vs yeast-form cells; not induced during GCN response, in contrast to S. cerevisiae ADE12, which is induced by Gcn4p; stationary phase-enriched protein
CR_00400C_A	-1.11457	0.00257002		WD repeat domain protein; Hap43-repressed gene; flow model biofilm induced
C3_07890W_A	-1.11156	0.0224661	MLS1	Malate synthase; glyoxylate cycle enzyme; no mammalian homolog; regulated upon white-opaque switch; phagocytosis, strong oxidative stress induced; stationary phase enriched; flow model biofilm repressed; rat catheter, Spider biofilm induced
C2_09120C_A	-1.11139	0.0260003	URA1	Dihydroorotate dehydrogenase; de novo pyrimidine biosynthesis; regulated by yeast-hypha switch, Nrg1/Mig1/Tup1; flow model biofilm induced; rat catheter and Spider biofilm repressed
CR_06180W_A	-1.11015	0.00350171	DAM1	Essential subunit of the Dam1 (DASH) complex, which acts in chromosome segregation by coupling kinetochores to spindle microtubules
C7_02100W_A	-1.10799	0.000299294		Protein of unknown function; Spider biofilm induced
CR_03260W_A	-1.10734	0.0156191		GlcNAc-induced protein
C3_01570W_A	-1.09977	0.00753652		Protein required for localizing proteasomes to the nucleus; involved in ubiquitin-mediated protein degradation; possibly an essential gene, disruptants not obtained by UAU1 method; Spider biofilm induced
CR_04780W_A	-1.09798	0.0053542	HCM1	Protein with forkhead domain; similar to S. cerevisiae Hcm1p; Hap43p-induced gene
C5_03960W_A	-1.09776	0.0243098	BUD31	Bud31 ortholog; not subject to mating-type regulation, in contrast to S. cerevisiae Bud31 which has a role in specifying the bud site; Spider biofilm induced
C1_13770C_A	-1.09747	0.00609351	LIP3	Secreted lipase; gene family member whose members are expressed differentially in response to carbon source and infection; possible role in nutrition and/or in creating an acidic microenvironment; flow model biofilm induced
C6_00380C_A	-1.09499	0.0099913		Protein with a dual-specificity phosphatase domain; Hap43-induced gene
CR_09690C_A	-1.09439	0.00638402		Putative integral membrane protein; S. cerevisiae ortholog Tvp23 localizes to late Golgi vesicles; rat catheter biofilm induced
C2_08810C_A	-1.09087	0.00911951	PET100	Chaperone that facilitates the assembly of cytochrome c oxidase; plasma membrane protein
C5_02800C_A	-1.08997	0.0171156	PDC2	Homeodomain-like transcription factor; regulator of pyruvate decarboxylase; contains a putative C-terminal activation domain, Glu- and Pro-rich; complements glucose utilization defect of S. cerevisiae pdc2 mutant
CR_02820W_A	-1.08921	0.00755664		Ortholog(s) have acylglycerol lipase activity, role in triglyceride metabolic process and lipid droplet, membrane localization
C6_03760C_A	-1.08161	0.0099913	SFU1	GATA-type transcription factor; regulator of iron-responsive genes; represses iron utilization genes if iron is present; Hap43-repressed; promotes gastrointestinal commensalism in mice; Spider biofilm induced
C1_07820W_A	-1.07833	0.00296774	ERO1	Ortholog of S. cerevisiae Ero1; role in formation of disulfide bonds in the endoplasmic reticulum; fluconazole-induced; induced by Mnl1 under weak acid stress; Spider biofilm induced
C3_02500W_A	-1.0778	0.0396756		Protein of unknown function; induced by Mnl1 under weak acid stress; Hap43-induced; mutant is viable
CR_08250C_A	-1.07477	0.00276273		Protein of unknown function; transcript regulated by white-opaque switch; flow model biofilm induced; Spider biofilm induced
CR_01400W_A	-1.07289	0.0239535		Ortholog(s) have role in mRNA splicing, via spliceosome and U2-type spliceosomal complex localization
C6_04440C_A	-1.07285	0.005689		Protein of unknown function; Hap43-repressed; rat catheter biofilm repressed
C3_02770C_A	-1.07202	0.0164541	ECM21	Predicted regulator of endcytosis of plasma membrane proteins; fluconazole induced, alkaline induced by Rim101; repressed by caspofungin and in azole-resistant strain overexpressing MDR1; flow model, rat catheter and Spider biofilm induced
C3_03120C_A	-1.07102	0.0344621	CLA4	Ste20p family Ser/Thr kinase required for wild-type filamentous growth, organ colonization and virulence in mouse systemic infection; role in chlamydospore formation; functional homolog of S. cerevisiae Cla4p; mutant caspofungin sensitive
C3_01410C_A	-1.07039	0.0221634		Ortholog of C. dubliniensis CD36 : Cd36_09630, C. parapsilosis CDC317 : CPAR2_805080, C. auris B8441 : B9J08_004031 and Candida tenuis NRRL Y-1498 : CANTEDRAFT_136811
C1_04490W_A	-1.07003	0.0028002		Ortholog of C. dubliniensis CD36 : Cd36_09650, C. parapsilosis CDC317 : CPAR2_805060, C. auris B8441 : B9J08_004034 and Candida tenuis NRRL Y-1498 : CANTEDRAFT_95780
C4_04110W_A	-1.06387	0.0184344	RPA34	Putative RNA polymerase I subunit; rat catheter biofilm induced
C1_05990C_A	-1.06381	0.0106055		Putative protein of unknown function; induced by prostaglandins
CR_10280W_A	-1.06166	0.00364867	FGR41	Putative GPI-anchored adhesin-like protein; transposon mutation affects filamentous growth; Spider biofilm repressed
C2_10440C_A	-1.05603	0.0047248	LKH1	Putative leukotriene A(4) hydrolase; repressed during the mating process; Hog1p-induced
C7_00220W_A	-1.05522	0.00723785	SNL1	Ribosome-associated protein predicted to function in protein synthesis; 1 predicted transmembrane domain; rat catheter biofilm repressed
C3_07430W_A	-1.0503	0.00049176		Protein of unknown function; Hap43-repressed gene
C5_03390C_A	-1.04959	0.047936		Protein of unknown function; Hap43-induced; rat catheter and Spider biofilm induced
C6_00630W_A	-1.04863	0.0305225	FCY23	Putative transporter; Gcn4p-regulated; more similar to S. cerevisiae Tpn1p, which is a vitamin B6 transporter, than to purine-cytosine permeases
C6_03040C_A	-1.04545	0.0239535	TBP1	Transcription initiation factor; binds TATA box sequence, binding does not require TFIIA; caspofungin repressed; functional homolog of S. cerevisiae and human TATA-binding proteins; Spider biofilm induced
C1_01140C_A	-1.04199	0.00428345		Ortholog(s) have mitochondrion localization
C1_07920W_A	-1.04143	0.0348758	NIT3	Putative nitrilase; regulated by Gcn2p and Gcn4p; protein present in exponential and stationary growth phase yeast cultures
C4_03250C_A	-1.03756	0.0178967	SFT2	Putative membrane protein; transcript regulated by Mig1; Spider biofilm induced
C5_00670C_A	-1.03241	0.0176014	CDC48	Putative microsomal ATPase; plasma membrane-localized; regulated by Gcn2 and Gcn4; induced by amino acid starvation (3-AT); macrophage/pseudohyphal-repressed; protein levels decrease in stationary phase yeast; Spider biofilm repressed
C3_03400C_A	-1.03207	0.013289	RPS17B	Ribosomal protein 17B; downregulated upon phagocytosis by murine macrophages; Hap43-induced; Spider biofilm repressed
C1_00770C_A	-1.0319	0.00817077		Ortholog(s) have role in chromatin silencing at silent mating-type cassette, double-strand break repair via homologous recombination, intra-S DNA damage checkpoint and mitotic sister chromatid cohesion, more
C3_03360W_A	-1.03062	0.0115373		Ortholog(s) have RNA polymerase III general transcription initiation factor activity and RNA polymerase III transcription regulator recruiting activity, more
C6_00680C_A	-1.03014	0.00344796	UBA4	Putative ubiquitin activating protein; Hap43-repressed; induced by prostaglandins; clade-associated gene expression
C7_04280C_A	-1.03011	0.00324486		Putative serine/threonine-protein kinase; possibly an essential gene, disruptants not obtained by UAU1 method
C6_03610W_A	-1.02883	0.0195003		Ortholog(s) have inositol phosphoceramide synthase regulator activity, role in inositol phosphoceramide metabolic process and inositol phosphoceramide synthase complex, integral component of Golgi membrane localization
C1_12260W_A	-1.02622	0.0155481		Protein of unknown function; induced by alpha pheromone in SpiderM medium
C6_04080W_A	-1.0225	0.00143143		Putative ortholog of S. cerevisiae Pex32 a peroxisomal integral membrane protein with a role in negative regulation of peroxisome size; Hap43-repressed gene
C4_06730C_A	-1.02063	0.00317669		Protein similar to ferric reductase Fre10p; possibly an essential gene, disruptants not obtained by UAU1 method
C7_02220C_A	-1.0188	0.0055754	RPL29	Ribosomal protein L29; induced upon germ tube formation; colony morphology-related gene regulation by Ssn6; intron in 5'-UTR; Spider biofilm repressed
C1_12890W_A	-1.01717	0.0195775		Ortholog(s) have acireductone dioxygenase (Ni2+-requiring) activity and role in L-methionine salvage from methylthioadenosine
C4_06430C_A	-1.01701	0.0168477	HAP43	CCAAT-binding factor-dependent transcription factor; repressor; also called CAP2; required for low iron response; similar to bZIP transcription factor AP-1; repressed by Sfu1; ciclopirox olamine induced; rat catheter, Spider biofilm induced
C2_05930W_A	-1.01522	0.0205669		Cell wall protein; induced in core stress response and core caspofungin response; iron-regulated; amphotericin B, ketoconazole, and hypoxia induced; regulated by Cyr1, Ssn6; induced in oralpharyngeal candidasis; Spider biofilm repressed
C2_06080C_A	-1.01444	0.0015766		Protein of unknown function; hypoxia, Hap43-repressed; ketoconazole induced; induced in oralpharyngeal candidasis; 16h flow model biofilm repressed, late-stage flow model biofilm induced; rat catheter and Spider biofilm induced
C3_03420C_A	-1.01389	0.0136734	RPL37B	Ribosomal protein L37; Hap43-induced; Spider biofilm repressed
C1_05000W_A	-1.01363	0.0142808	GIN1	Protein involved in regulation of DNA-damage-induced filamentous growth; putative component of DNA replication checkpoint; ortholog of S. cerevisiae Mrc1p, an S-phase checkpoint protein; Hap43p-induced gene
C2_09030W_A	-1.01299	0.00659863	PHO84	High-affinity phosphate transporter; transcript regulated by white-opaque switch; Hog1, ciclopirox olamine or alkaline induced; caspofungin, stress repressed; required for normal TORC1 function
C2_00810C_A	-1.01257	0.00210369	BTA1	Ortholog of C. dubliniensis CD36 : Cd36_10780, C. parapsilosis CDC317 : CPAR2_208080, C. auris B8441 : B9J08_003841 and Candida tenuis NRRL Y-1498 : CANTEDRAFT_120956
C4_06960W_A	-1.01106	0.0113115		Protein of unknown function; transcript upregulated by benomyl treatment
C5_02210W_A	-1.01071	0.0147993		Ortholog(s) have COPII adaptor activity and role in endoplasmic reticulum to Golgi vesicle-mediated transport, fungal-type cell wall organization, protein retention in Golgi apparatus
C7_02170C_A	-1.01024	0.00324486	EGD1	Putative GAL4 DNA-binding enhancer protein; soluble protein in hyphae; biofilm induced; macrophage/pseudohyphal-induced; equal level of protein in exponential and stationary growth phase yeast cultures; Spider biofilm repressed
C3_02080W_A	-1.00912	0.004108		Ortholog of C. dubliniensis CD36 : Cd36_11020 and Candida albicans WO-1 : CAWG_00266
CR_05620C_A	-1.00891	0.0117671		Ortholog(s) have ATPase activator activity, protein binding, bridging activity and role in late endosome to vacuole transport, late endosome to vacuole transport via multivesicular body sorting pathway
C1_05530C_A	-1.00854	0.0068991		Protein of unknown function; Hap43-induced gene
C6_00960W_A	-1.008	0.0252032	SER33	Predicted enzyme of amino acid biosynthesis; Gcn4p-regulated; upregulated in biofilm; protein present in exponential and stationary growth phase yeast cultures; S. cerevisiae ortholog is Gcn4p regulated
C4_04720W_A	-1.00721	0.012977	RPN2	Putative 26S proteasome subunit; transcript regulated by Mig1; caspofungin repressed; regulated by Gcn2 and Gcn4; gene used for strain identification by multilocus sequence typing
C1_00520W_A	-1.00717	0.0171306	MSO1	Putative secretory protein involved in S. cerevisiae sporulation; repressed during pseudohyphal growth in the presence of lysed macrophages; Hap43-repressed; Spider biofilm induced
C1_13910C_A	-1.00569	0.00814587		Has domain(s) with predicted protein tyrosine phosphatase activity
C1_10280C_A	-1.00553	0.00746836		Protein of unknown function; Hap43-repressed gene
CR_07490C_A	-1.00461	0.0248163		Predicted alanine-tRNA ligase; oxidative stress-induced via Cap1
C3_00340W_A	-1.00407	0.0305225	VPH2	Protein required for for proper vacuolar ATPase assembly and vacuolar functions
CR_08150W_A	-1.00343	0.0047248		Ortholog(s) have role in mRNA splicing, via spliceosome and U4/U6 snRNP, U4/U6 x U5 tri-snRNP complex localization
C2_07510W_A	-1.00242	0.00554934		Ortholog of C. dubliniensis CD36 : Cd36_11890 and Candida albicans WO-1 : CAWG_00170
C4_06010C_A	-1.00203	0.0219994	RVS162	Protein containing a BAR domain, which is found in proteins involved in membrane curvature; null mutant does not display the endocytic, hyphal growth, virulence, or cell wall defects exhibited by mutants in related genes RVS161 and RVS167
C1_10180C_A	-0.99803	0.0115919		Has domain(s) with predicted DNA binding, nucleic acid binding activity
C4_04350W_A	-0.997299	0.00237278		Has domain(s) with predicted nucleic acid binding activity
C2_10620W_A	-0.994842	0.00672302		Ortholog(s) have Rab GTPase binding activity and Golgi apparatus localization
CR_07700W_A	-0.992464	0.0188184	SPC3	Essential protein; similar to S. cerevisiae Spc3p, a component of the signal peptidase complex required for signal peptidase activity; predicted integral ER membrane protein; complements spc3 and suppresses sec61 S. cerevisiae mutants
C7_00200W_A	-0.99141	0.0195003		Putative histidine permease; fungal-specific (no human or murine homolog); Hap43p-induced gene
C7_00060C_A	-0.990574	0.0132861	MSH6	Protein similar to S. cerevisiae Msh6p, which is involved in mismatch repair; repressed under Cdc5p depletion; Hap43p-induced gene
C2_01390W_A	-0.989138	0.00143143		Ortholog of C. dubliniensis CD36 : Cd36_12240, C. parapsilosis CDC317 : CPAR2_801750, C. auris B8441 : B9J08_002031, Candida tenuis NRRL Y-1498 : CANTEDRAFT_135403 and Pichia stipitis Pignal : PICST_29111
C1_09640W_A	-0.988707	0.00182969		Ortholog(s) have role in ascospore wall assembly and ascospore wall, prospore membrane localization
C3_02190C_A	-0.988671	0.00276273	RPN1	Putative 19S regulatory particle of the 26S proteasome; regulated by Gcn2p and Gcn4p
C1_06640C_A	-0.988592	0.0187911	KEM1	5'->3' exoribonuclease of cytoplasmic stress granules; role in filamentous growth; complements slow growth/mating of S. cerevisiae kem1 mutant; required for SD or Spider medium biofilm formation
C7_04290W_A	-0.987681	0.0107518		Ortholog(s) have role in cellular calcium ion homeostasis, regulation of G0 to G1 transition
C3_05180W_A	-0.986404	0.00651252	SEC18	Functional homolog of S. cerevisiae Sec18p, which acts in protein transport; conserved ATP binding site; not glycosylated
C4_00180W_A	-0.984936	0.00343993	GCV3	Glycine decarboxylase, subunit H; protein level decrease in stationary phase cultures
C6_01050W_A	-0.983071	0.00642149	DIM1	Putative 18S rRNA dimethylase; predicted role in rRNA modification and processing; Hap43-induced; likely to be essential for growth based on insertional mutagenesis strategy; F-12/CO2 early biofilm induced
CR_00410W_A	-0.982025	0.00698603		Has domain(s) with predicted nucleic acid binding activity
C4_01520C_A	-0.980707	0.0211008	DUR32	Putative urea transporter; possibly an essential gene, disruptants not obtained by UAU1 method
C4_00050W_A	-0.9807	0.00624636		Ortholog of C. dubliniensis CD36 : Cd36_12800, C. parapsilosis CDC317 : CPAR2_203460, C. auris B8441 : B9J08_004645 and Candida tenuis NRRL Y-1498 : CANTEDRAFT_94106
C1_01750W_A	-0.980264	0.00258982	MODF	Has domain(s) with predicted ATP binding, ATPase activity, nucleoside-triphosphatase activity
C3_07150C_A	-0.980137	0.0165445	DOS2	Protein of unknown function; induced during planktonic growth
C4_01950W_A	-0.97975	0.00466227	SIM1	Adhesin-like protein; involved in cell wall maintenance, redundant with Sun41; possibly secreted; macrophage-repressed; repressed by Rim101, Cyr1, Ras1; Spider biofilm induced
C2_01210C_A	-0.979368	0.0325754	OCA6	Putative protein phosphatase of the PTP family (tyrosine-specific), similar to S. cerevisiae Oca6p; mutant shows virulence defect
C2_05570C_A	-0.979078	0.0250535		Putative Rho GDP dissociation inhibitor; induced by nitric oxide independent of Yhb1p
C3_04710W_A	-0.978056	0.0300855	APL1	Putative beta-adaptin, large subunit of the clathrin associated protein complex (AP-2); mutation causes decreased colony wrinkling in filamentous growth-inducing conditions, but does not block hyphal formation in liquid media
C1_12030W_A	-0.977892	0.00777489	DDI1	Putative DNA damage inducible v-SNARE binding protein; macrophage/pseudohyphal-repressed
C1_09980C_A	-0.976899	0.00466227		Putative zinc-finger domain protein with a predicted role in pre-mRNA splicing; Hap43-repressed; Spider biofilm repressed
C6_01020W_A	-0.975777	0.0419814		Ortholog of Candida albicans WO-1 : CAWG_00007
CR_09910W_A	-0.974993	0.0355545		Protein of unknown function; transcript detected on high-resolution tiling arrays
C3_00500C_A	-0.974662	0.00523707		Protein of unknown function; transcript detected on high-resolution tiling arrays
C3_03930W_A	-0.974661	0.0127519		Predicted ORF in retrotransposon Zorro2 with similarity to retroviral reverse transcriptase proteins
CR_09010C_A	-0.973544	0.0178976		Ortholog of C. dubliniensis CD36 : Cd36_15040
C1_03380W_A	-0.973051	0.02179	NAT2	Putative N-terminal acetyltransferase; Hap43p-repressed gene; mutation confers hypersensitivity to toxic ergosterol analog
CR_04530W_A	-0.972726	0.0111921		Putative integral peroxisomal membrane protein; Hap43p-repressed gene
C1_05560W_A	-0.97222	0.0271852		snRNP U5 splicing factor component; involved in positioning the 3' splice site during the 2nd catalytic step of splicing; Spider biofilm induced
C2_04600C_A	-0.971614	0.00909517	RPL38	60S ribosomal ribosomal protein subunit; genes encoding cytoplasmic ribosomal subunits, translation factors, tRNA synthetases are downregulated upon phagocytosis by murine macrophage
CR_06970C_A	-0.969779	0.0150795		Putative protein of unknown function; Hap43p-repressed gene
C7_02960C_A	-0.968792	0.00541525		Putative pre-mRNA-splicing factor; possibly an essential gene, disruptants not obtained by UAU1 method
C2_09070C_A	-0.968398	0.0360666	RFA1	Putative DNA replication factor A; RNA abundance regulated by cell cycle, tyrosol and cell density
C2_08720W_A	-0.966388	0.00279545		Ortholog of S. cerevisiae Ecm16, an essential DEAH-box ATP-dependent RNA helicase specific to the U3 snoRNP required for 18S rRNA synthesis; Hap43-induced; Spider biofilm induced
C3_01890C_A	-0.966062	0.0128651	SAP30	Aspartic-type endopeptidase; involved in degradation of alpha pheromone; functional equivalent of S. cerevisiae Bar1; a-cell specific; induced by alpha pheromone
C1_05940W_A	-0.965972	0.0122549	PHHB	Putative 4a-hydroxytetrahydrobiopterin dehydratase; transposon mutation affects filamentous growth; flow model biofilm induced; Spider biofilm induced
C4_06080W_A	-0.965901	0.0240041	DFG5	N-linked mannoprotein of cell wall and membrane; possible signal transducer; role in hyphal growth and HWP1 induction in alkaline pH; GPI modification predicted; dfg5 dcw1 double mutant is inviable; caspofungin-induced, fungal-specific
CR_03850W_A	-0.965879	0.00450367		Ortholog(s) have (R)-carnitine transmembrane transporter activity, choline transmembrane transporter activity, ethanolamine transmembrane transporter activity
C5_00900C_A	-0.964864	0.0148191		Protein with a predicted role in mitochondrial iron metabolism; Hap43-repressed; expression upregulated during growth in the mouse cecum; Spider biofilm induced
C2_00480C_A	-0.962709	0.0216127		Ortholog(s) have ATP binding, ATPase activity, metallopeptidase activity and role in cellular protein-containing complex assembly, proteolysis, signal peptide processing
C3_05100C_A	-0.956802	0.00723514		Ortholog of C. dubliniensis CD36 : Cd36_15670, C. parapsilosis CDC317 : CPAR2_213100, C. auris B8441 : B9J08_001290 and Candida tenuis NRRL Y-1498 : CANTEDRAFT_135034
CR_05440W_A	-0.955006	0.0106055		Ortholog(s) have diacylglycerol kinase activity, role in phosphatidic acid biosynthetic process and integral component of endoplasmic reticulum membrane localization
C5_01520C_A	-0.952152	0.00385559		Ortholog of C. dubliniensis CD36 : Cd36_15750, C. parapsilosis CDC317 : CPAR2_213000, C. auris B8441 : B9J08_003326, Debaryomyces hansenii CBS767 : DEHA2D18524g and Pichia stipitis Pignal : PICST_42355
C2_03290W_A	-0.951966	0.0171156		Protein of unknown function; rat catheter biofilm induced
C3_03010C_A	-0.95123	0.00391804	MXR1	Putative methionine sulfoxide reductase; Plc1-regulated; induced by human neutrophils, flucytosine; macrophage regulated (gene induced, protein decreased); possibly adherence-induced; Spider biofilm induced
C5_03740W_A	-0.947894	0.0391514		PProtein of unknown function; gene has intron; similar to human BLOC1S2
C1_01190C_A	-0.947491	0.00466227	ERG28	Ortholog(s) have protein binding, bridging activity, role in demethylation, ergosterol biosynthetic process and endoplasmic reticulum membrane localization
CR_02690W_A	-0.947016	0.0329347	KAR2	Similar to Hsp70 family chaperones; role in translocation of proteins into the ER; induced in high iron; protein present in exponential and stationary growth phase yeast cultures; flow model and Spider biofilm repressed
C1_11920W_A	-0.941996	0.00385559	HNM1	Putative choline/ethanolamine transporter; mutation confers hypersensitivity to toxic ergosterol analog; colony morphology-related gene regulation by Ssn6; clade-associated gene expression
CR_02220C_A	-0.941492	0.0333941		Ortholog(s) have phosphatidylinositol-4,5-bisphosphate binding activity, role in actin cortical patch assembly, actin filament organization, endocytosis and actin cortical patch localization
CR_03610C_A	-0.93975	0.00335939	APT1	Adenine phosphoribosyltransferase; flucytosine induced; repressed by nitric oxide; protein level decreased in stationary phase yeast cultures
C3_04220C_A	-0.939616	0.0205824		Ortholog(s) have ATP-dependent microtubule motor activity, plus-end-directed, protein-containing complex binding activity
C2_08120W_A	-0.93817	0.0132426		Protein of unknown function; induced in azole-resistant strain that overexpresses MDR1; protein present in exponential and stationary growth phase yeast cultures; Spider biofilm induced
C1_01360C_A	-0.937656	0.0126091		Putative RNA polymerase transcription factor TFIIH core component; possibly an essential gene, disruptants not obtained by UAU1 method
C1_10080W_A	-0.937224	0.0239535		Ortholog(s) have tRNA-specific adenosine deaminase activity and role in tRNA modification
C6_00480C_A	-0.931706	0.0391514	PPE1	Protein similar to S. cerevisiae Ppe1p; shows genetic interaction with some genes involved in diploid filamentous growth and haploid invasive growth in S. cerevisiae
C2_09870W_A	-0.929276	0.00296774	REX2	Putative 3'-5' RNA exonuclease with a predicted role in 3'-end processing of U4 and U5 snRNAs, 5S and 5.8S rRNAs; rat catheter biofilm induced
C2_01510C_A	-0.928412	0.0471819		2-hydroxyacid dehydrogenase domain-containing protein; Hap43-repressed gene; induced by alpha pheromone in SpiderM medium
CR_04810W_A	-0.928294	0.00979056	STT3	Putative oligosaccharyltransferase complex component; flow model and rat catheter biofilm repressed
C2_10320C_A	-0.92594	0.0323481	RAD7	Protein similar to S. cerevisiae Rad7p, which is a subunit of the Nucleotide Excision Repair Factor 4; induced under hydroxyurea treatment
CR_00690C_A	-0.925574	0.00652741	RAD23	S. cerevisiae Rad23 ortholog; binds damaged DNA; Spider biofilm repressed
CR_07630C_A	-0.9249	0.012977		Putative mitochondrial RNA polymerase specificity factor; possibly an essential gene, disruptants not obtained by UAU1 method
C2_00270C_A	-0.924448	0.00746177		Protein of unknown function; macrophage-induced gene
C1_01460W_A	-0.924357	0.00514129		Ortholog(s) have double-stranded DNA binding, polynucleotide 3'-phosphatase activity and role in double-strand break repair
C1_06550W_A	-0.923561	0.0082442	HOM2	Aspartate-semialdehyde dehydrogenase; forms a homodimer; conserved in bacteria, archaea, and fungi but not in mammals; ketoconazole-repressed; protein present in exponential and stationary growth phase yeast cultures; GlcNAc-induced protein
C1_03690W_A	-0.922911	0.013149		Protein of unknown function
C4_05970W_A	-0.922803	0.00397426	UTP21	Putative U3 snoRNP protein; Hap43-induce; physically interacts with TAP-tagged Nop1; Spider biofilm induced
C3_03320W_A	-0.922727	0.0377207		Protein of unknown function; Spider biofilm induced
C2_08970C_A	-0.9225	0.0159283		Predicted membrane transporter; member of the drug:proton antiporter (12 spanner) (DHA1) family, major facilitator superfamily (MFS); mRNA binds She3
C6_00970C_A	-0.920575	0.00181512	HGT20	Putative glucose transporter of the major facilitator superfamily; the C. albicans glucose transporter family comprises 20 members; 12 probable membrane-spanning segments; regulated by Nrg1
C1_02680C_A	-0.920323	0.0198679		Putative mitochondrial protein of unknown function; regulated by Sef1p-, Sfu1p-, and Hap43p
C7_00250C_A	-0.920265	0.00523707	SER2	Ortholog(s) have phosphoserine phosphatase activity and role in L-serine biosynthetic process
C6_03290W_A	-0.919531	0.00746177		Ortholog(s) have rRNA binding activity, role in rRNA processing, ribosomal small subunit assembly and CURI complex, UTP-C complex localization
C5_02260C_A	-0.919241	0.0223221		Ortholog(s) have nuclear import signal receptor activity, role in mRNA export from nucleus, protein import into nucleus and cytoplasm, nucleus localization
C1_02060W_A	-0.914695	0.00335939		Ortholog of C. dubliniensis CD36 : Cd36_17620, C. parapsilosis CDC317 : CPAR2_212260, Candida tropicalis MYA-3404 : CTRG_01348, Candida albicans WO-1 : CAWG_04043 and Candida metapsilosis : CMET_2351
C5_01110W_A	-0.91279	0.0086724		Predicted amino acid transmembrane transporter; rat catheter biofilm repressed
C1_02770W_A	-0.912545	0.00845259		Ortholog(s) have role in endoplasmic reticulum to Golgi vesicle-mediated transport and COPII-coated ER to Golgi transport vesicle, endoplasmic reticulum membrane, integral component of Golgi membrane localization
C4_05460C_A	-0.912278	0.0307967	UGA6	Putative GABA-specific permease; decreased transcription is observed upon benomyl treatment or in an azole-resistant strain that overexpresses MDR1
C1_00890W_A	-0.911502	0.0119395	SUR2	Putative ceramide hydroxylase; predicted enzyme of sphingolipid biosynthesis; regulated by Tsa1, Tsa1B under H2O2 stress conditions; Spider and flow model biofilm induced
C7_04100C_A	-0.910943	0.0111926	ERI1	Protein of unknown function; Spider biofilm induced
C2_00210W_A	-0.910566	0.0072785		Putative adhesin-like protein; upregulated during growth in the mouse cecum; flow model, rat catheter and Spider biofilm induced
C3_03390C_A	-0.907118	0.0250535		Ortholog of S. cerevisiae Ett1, a nuclear protein that inhibits replication of Brome mosaic virus; early-stage flow model biofilm induced
C1_08710W_A	-0.907053	0.00181512	HYU1	Putative hydantoin utilization protein A; induced upon adherence to polystyrene; regulated by Gcn2p and Gcn4p
C7_03980W_A	-0.906241	0.0152456		Ortholog(s) have transferase activity, role in maturation of SSU-rRNA and cytoplasm localization
C2_06130W_A	-0.904516	0.00188378	IDH2	Putative mitochondrial NAD-isocitrate dehydrogenase subunit; induced by ciclopirox; induced in high iron; present in exponential and stationary growth phases; Spider biofilm repressed
CR_08170C_A	-0.903965	0.00686115		Ortholog(s) have protein-arginine omega-N monomethyltransferase activity and role in peptidyl-arginine methylation
C3_07550C_A	-0.903378	0.0381075		Ortholog of C. dubliniensis CD36 : Cd36_17965, C. parapsilosis CDC317 : CPAR2_211700, C. auris B8441 : B9J08_004599 and Candida tenuis NRRL Y-1498 : CANTEDRAFT_112898
C1_09690W_A	-0.903197	0.0371187	STP4	C2H2 transcription factor; induced in core caspofungin response; colony morphology-related gene regulation by Ssn6; induced by 17-beta-estradiol, ethynyl estradiol; rat catheter and Spider biofilm induced
C6_01000C_A	-0.900583	0.00932475		Ortholog(s) have cytoplasm, nucleus localization
C7_00340C_A	-0.898483	0.00943054		Ortholog of C. dubliniensis CD36 : Cd36_18040, C. parapsilosis CDC317 : CPAR2_211790, C. auris B8441 : B9J08_004373 and Candida tenuis NRRL Y-1498 : CANTEDRAFT_109928
C2_04380C_A	-0.896645	0.00667762	PGA17	Putative GPI-anchored protein; exogenously expressed protein substrate for Kex2 processing in vitro; repressed by alpha pheromone in SpiderM medium; macrophage-induced; induced in oralpharyngeal candidiasis; Spider biofilm induced
C6_00190W_A	-0.896151	0.00343993	THI20	Putative trifunctional enzyme of thiamine biosynthesis, degradation and salvage; Spider biofilm induced
C1_01090C_A	-0.894982	0.0126091		Protein required for respiratory growth
C4_04000W_A	-0.892862	0.004108	COX6	Putative cytochrome c oxidase; flucytosine induced
CR_07320C_A	-0.89118	0.0290983	SAP99	Putative secreted aspartyl protease; possible Kex2 substrate; induced by low iron; repressed by alpha pheromone in SpiderM medium; possibly essential (UAU1 method); regulated by Sef1, Sfu1, and Hap43; Spider biofilm induced
CR_04490C_A	-0.888993	0.00336065		Ortholog(s) have protein-N-terminal asparagine amidohydrolase activity, protein-N-terminal glutamine amidohydrolase activity and role in N-terminal protein amino acid modification, protein catabolic process
C1_05750C_A	-0.888317	0.00555909		Predicted protein kinase similar to S. cerevisiae Nnk1; implicated in proteasome function in S. cerevisiae; induced by Mnl1 under weak acid stress
C1_14470W_A	-0.885188	0.0201485		Ortholog(s) have role in Golgi vesicle transport and Golgi membrane localization
C3_02340W_A	-0.884282	0.0203332	RPS9B	Predicted ribosomal protein; repressed upon phagocytosis by murine macrophage; transcript possibly regulated upon hyphal formation; Spider biofilm repressed
C2_03760C_A	-0.883828	0.0276473		Putative endoribonuclease; induced by nitric oxide independent of Yhb1p; mutation confers hypersensitivity to aureobasidin A
CR_10760C_A	-0.883393	0.00911951	GNA1	Glucosamine-6-phosphate acetyltransferase; enzyme of UDP-GlcNAc biosynthesis; required for viability in absence of GlcNAc supplementation; required for persistent infection and wild-type virulence in mouse systemic infection
C3_05590C_A	-0.882841	0.00878339		Ortholog(s) have role in nucleosome mobilization and Ino80 complex, cytosol, nucleus localization
C2_01520W_A	-0.882779	0.0305218		Ortholog(s) have carbohydrate binding, mannosyl-oligosaccharide 1,2-alpha-mannosidase activity
C1_00510W_A	-0.882654	0.00543416	SCH9	Protein kinase; involved in growth control, ribosomal protein synthesis, cell size, resistance to rapamycin,, chlamydospore formation, filamentous growth, and virulence; prevents hyphal growth in hypoxia at high CO2
C5_04170W_A	-0.882459	0.0111755		Ortholog of C. dubliniensis CD36 : Cd36_18730, C. parapsilosis CDC317 : CPAR2_212510, C. auris B8441 : B9J08_004481 and Candida tenuis NRRL Y-1498 : CANTEDRAFT_135843
C3_07570C_A	-0.881466	0.0211921		Putative mitochondrial carrier family transporter; rat catheter biofilm induced
C2_02290C_A	-0.880736	0.0302035	STE4	Beta subunit of heterotrimeric G protein of mating signal transduction pathway; required for mating; transcript is specific to cells homozygous at MTL; induced by alpha pheromone; ortholog of S. cerevisiae Ste4
C4_05240C_A	-0.877229	0.00237278	BAT21	Putative branched chain amino acid aminotransferase; regulated by Gcn4, Gcn2; induced in response to amino acid starvation (3-aminotriazole treatment); early-stage flow model biofilm formation
C2_09950W_A	-0.875278	0.00291816	SSN3	Putative cyclin-dependent protein kinase; with protein phosphatase Ptc2p controls hyphal elongation through phosphorylation of transcription factor Ume6p and its stability; mutants are sensitive to growth on H2O2 medium
C4_05300W_A	-0.87462	0.00817077		Ortholog(s) have tetrahydrofolylpolyglutamate synthase activity, role in one-carbon metabolic process and cytoplasm, mitochondrion localization
C1_05610W_A	-0.87429	0.00654267		Predicted protein with similarity to cell wall proteins; possibly an essential gene, disruptants not obtained by UAU1 method
C5_03070W_A	-0.874229	0.0425888		Ortholog of Candida albicans WO-1 : CAWG_04200
C1_05540C_A	-0.872024	0.0279964		Protein of unknown function; Hap43-repressed; rat catheter biofilm repressed
C1_10910C_A	-0.871196	0.00834771		Similar to HMG-box variant of S. pombe; Spider biofilm repressed
CR_05720W_A	-0.869046	0.0479369	KTR2	Mannosyltransferase; transcription elevated in chk1, nik1, and sln1 homozygous null mutants; fungal-specific (no human or murine homolog); possibly an essential gene, disruptants not obtained by UAU1 method
C1_10770W_A	-0.867418	0.00995272	RPL17B	Ribosomal protein L17; mutation confers hypersensitivity to 5-FU, tubercidin; repressed upon phagocytosis by macrophage; Hap43-induced; Spider biofilm repressed
C5_02350C_A	-0.866024	0.048299		Putative ortholog of S. cerevisiae Utp30; a U3-containing 90S preribosome complex protein; Hap43-induced; Spider biofilm induced
C2_02610C_A	-0.865742	0.00979056		Ortholog of C. dubliniensis CD36 : Cd36_19320, C. parapsilosis CDC317 : CPAR2_209670, C. auris B8441 : B9J08_002950 and Candida tenuis NRRL Y-1498 : CANTEDRAFT_113478
C3_03080W_A	-0.864667	0.00804016		Ortholog of C. dubliniensis CD36 : Cd36_19390, C. parapsilosis CDC317 : CPAR2_209600, C. auris B8441 : B9J08_004606 and Candida tenuis NRRL Y-1498 : CANTEDRAFT_134010
CR_08070W_A	-0.864537	0.0102391	CYT1	Cytochrome c1; induced in high iron; alkaline repressed; possibly an essential gene, disruptants not obtained by UAU1 method; Hap43-repressed; Spider biofilm repressed
C2_07640W_A	-0.864226	0.0113347	RHO3	Putative Rho family GTPase; possible substrate of protein farnesyltransferase and geranylgeranyltransferase type I; greater transcription in hyphal form than yeast form; plasma membrane-localized
C1_00160C_A	-0.862905	0.0255694		Putative sulfiredoxin; regulated by Tsa1, Tsa1B in minimal media at 37 degrees C; flow model biofilm induced; Spider biofilm induced
CR_04680C_A	-0.859701	0.00466227	FRE9	Ferric reductase; alkaline induced; ciclopirox olamine; Hap43-induced
CR_02740W_A	-0.857735	0.0350262	SGO1	Component of the spindle checkpoint; cell-cycle regulated periodic mRNA expression
CR_08870W_A	-0.85709	0.0367922	CDC7	Catalytic subunit of Dbf4p-regulated serine/threonine protein kinase; negative regulator of hyphal development; cell-cycle regulated periodic mRNA expression; S. cerevisiae ortholog is not cell-cycle regulated
C4_00320C_A	-0.855394	0.00541525		Protein of unknown function; S. cerevisiae YLR407W mutants have abnormal budding; constitutive expression independent of MTL or white-opaque status; Spider biofilm induced
CR_06850C_A	-0.854065	0.0300855		Ribosomal 60S subunit protein L31B; Spider biofilm repressed
C7_03960C_A	-0.853769	0.00276273	PEX6	Ortholog(s) have ATPase activity and role in fatty acid metabolic process, protein import into peroxisome matrix, receptor recycling, protein targeting to peroxisome, protein unfolding, replicative cell aging
C3_04550C_A	-0.853072	0.0193708		Ortholog(s) have mitochondrial intermembrane space localization
C7_00990W_A	-0.85251	0.0155481		Ortholog of C. dubliniensis CD36 : Cd36_19950, C. parapsilosis CDC317 : CPAR2_104135, Candida tenuis NRRL Y-1498 : cten_CGOB_00075 and Debaryomyces hansenii CBS767 : DEHA2F07964g
CR_00170W_A	-0.851182	0.01403		Ortholog(s) have histone binding activity, role in DNA replication-dependent nucleosome assembly and CAF-1 complex, cytoplasm, nucleus localization
C2_06310C_A	-0.850982	0.00775653		Ortholog(s) have protein-lysine N-methyltransferase activity and role in peptidyl-lysine dimethylation, peptidyl-lysine monomethylation, vesicle-mediated transport
C1_04100C_A	-0.850098	0.0133674		Putative NADPH-dependent methylglyoxal reductase; homozygous transposon insertion causes decreased colony wrinkling under filamentous growth-inducing conditions, but does not block true hyphal formation in liquid media
CR_08410W_A	-0.849512	0.00327771		Putative lipid raft associated protein; Spider biofilm induced
C7_00380W_A	-0.849488	0.00304847	RPS8A	Small 40S ribosomal subunit protein; induced by ciclopirox olamine; repressed upon phagocytosis by murine macrophage; 5'-UTR intron; Hap43-induced; Spider biofilm repressed
C1_14480W_A	-0.849369	0.0226486	PNG2	Putative peptide:N-glycanase; gene has variable numbers of 12-bp repeats; induced by caspofungin, ciclopirox olamine, ketoconazole or hypoxia; gene of core caspofungin response; Hap43-induced; Spider biofilm induced
C1_06850W_A	-0.848869	0.0128651		Protein of unknown function; Hap43-repressed gene
CR_07150W_A	-0.847251	0.0325755		Predicted diphthamide biosynthesis protein; Spider biofilm induced
C1_01880C_A	-0.846822	0.0139789		Protein conserved in C. dublinensis
C1_09650W_A	-0.845392	0.0307967	COX9	Putative subunit VIIa of cytochrome c oxidase; flucytosine induced
C3_03490W_A	-0.844878	0.00686115	TES1	Putative acyl-CoA thioesterase
C5_03830C_A	-0.842019	0.0388212		Ortholog(s) have acyl-CoA hydrolase activity, role in fatty acid beta-oxidation, fatty acid oxidation and peroxisome localization
C4_04570W_A	-0.84184	0.0499939		Ortholog(s) have 8-oxo-dGDP phosphatase activity, thiamine diphosphokinase activity and role in thiamine biosynthetic process, thiamine metabolic process
C1_06560W_A	-0.84156	0.0250535	PMT4	Protein mannosyltransferase; required for WT cell wall composition and virulence in mice; roles in hyphal growth and drug sensitivity; one of 5 family members; Axl2 a substrate; Spider biofilm repressed; Bcr1-repressed in RPMI a/a biofilm
C1_13420C_A	-0.841112	0.00391804	CSM3	Putative subunit of a replication fork-pausing checkpoint complex
CR_08620C_A	-0.840112	0.00758389	RPN10	Putative 19S regulatory particle of the 26S proteasome; macrophage/pseudohyphal-repressed; regulated by Gcn2 and Gcn4; Spider biofilm repressed
C5_03350W_A	-0.837402	0.0224661	SER1	Putative 3-phosphoserine aminotransferase; predicted role in serine and glycine biosynthesis; protein present in exponential and stationary yeast growth phases; Spider biofilm repressed
C4_01740W_A	-0.836858	0.0086065		Ortholog of C. dubliniensis CD36 : Cd36_20660, C. parapsilosis CDC317 : CPAR2_104730, Candida tenuis NRRL Y-1498 : CANTEDRAFT_133951 and Debaryomyces hansenii CBS767 : DEHA2F02068g
C7_02110W_A	-0.834788	0.0126898	GSP1	Small RAN G-protein; essential; no prenylation predicted; can rescue S. cerevisiae gsp1 viability; macrophage/pseudohyphal-induced; transcript not regulated by white-opaque, yeast-hypha switching; GlcNAc-induced; Spider biofilm repressed
C1_05670W_A	-0.829422	0.048299	EFH1	APSES transcription factor; homodimer; minor role in transcriptional regulation vs Efg1; regulates filamentous growth, phenotypic switch; EFG1 and EFH1 genetically interact; expression interferes with mouse intestinal tract colonization
C5_00650C_A	-0.829265	0.0152456	RTS1	Putative serine/threonine-protein phosphatase B-type regulatory subunit; transcription is regulated upon yeast-hyphal switch
C3_00610W_A	-0.828783	0.0323568		Putative peptide N-glycanase; induced by nitric oxide independent of Yhb1p
C3_06440W_A	-0.828109	0.0028002		Ortholog of C. parapsilosis CDC317 : CPAR2_201960, C. dubliniensis CD36 : Cd36_20900, Candida metapsilosis : CMET_3324 and Candida tropicalis NEW ASSEMBLY : CTRG1_04756
C1_09620C_A	-0.827343	0.0124687		Predicted ORF from Assembly 19; removed from Assembly 20; restored based on transcription data; similar to orf19.7550
C7_01820C_A	-0.826903	0.00554934		Predicted kinase; rat catheter, flow model, Spider biofilm induced
C3_06360C_A	-0.82423	0.0086065	VAS1	Putative tRNA-Val synthetase; genes encoding ribosomal subunits, translation factors, and tRNA synthetases are downregulated upon phagocytosis by murine macrophage
C2_03820C_A	-0.824129	0.0111064	GRE2	Putative reductase; Nrg1 and Tup1-regulated; benomyl- and hyphal-induced; macrophage/pseudohyphal-repressed; repressed by low iron; possibly involved in osmotic stress response; stationary phase enriched protein; Spider biofilm induced
C3_04080W_A	-0.824076	0.0041178	RPL11	Ribosomal protein; repressed by phagocytosis; colony morphology-related gene regulation by Ssn6; Hap43-induced; Spider biofilm repressed
C7_03840W_A	-0.823643	0.0153462	PRE2	Putative proteasome beta-5 subunit; macrophage-induced protein
C3_01180C_A	-0.820291	0.00770672		Similar to oxidoreductases and to S. cerevisiae Yjr096wp; Sfu1 repressed; induced by benomyl treatment, Ssr1; Hap43-repressed; flow model biofilm repressed
C4_00190W_A	-0.820227	0.0231735		Putative transcription factor with zinc finger DNA-binding motif
C1_03550C_A	-0.82006	0.00335939	RFA2	Putative DNA replication factor A; RNA abundance regulated by cell cycle, tyrosol and cell density
CR_03530W_A	-0.819686	0.00143143		Putative 3-phosphoserine phosphatase; induced by benomyl or in azole-resistant strain that overexpresses MDR1; early-stage flow model biofilm induced; Spider biofilm repressed
CR_02510W_A	-0.818948	0.0493272		Ortholog(s) have mitochondrion localization
C2_00600C_A	-0.817908	0.0148686		Protein of unknown function; transcription induced by benomyl treatment
C6_02240C_A	-0.812698	0.0438922	CCT5	T-complex protein 1, epsilon subunit; protein present in exponential and stationary growth phase yeast cultures; Spider biofilm repressed
C6_01340C_A	-0.812692	0.0183246	MCM3	Putative DNA replication protein; periodic mRNA expression, peak at cell-cycle M/G1 phase; Spider biofilm induced
C2_08850C_A	-0.812565	0.00840166	2001-04-01	Vacuolar aspartic proteinase; transcript equivalent in yeast-form and mycelial cells but is elevated at lower growth temperatures; upregulated iby human neutrophils; protein enriched in stationary phase; Spider biofilm induced
C6_01220C_A	-0.811764	0.00834352	MED4	RNA polymerase II core mediator complex subunit
CR_07330W_A	-0.810583	0.0251931		Has domain(s) with predicted nucleic acid binding activity
CR_03390C_A	-0.809764	0.0175671		Ortholog(s) have mRNA binding activity and role in mRNA splice site selection, mRNA splicing, via spliceosome, positive regulation of mRNA splicing, via spliceosome
C4_03530W_A	-0.808765	0.0349618		Ortholog(s) have protein serine/threonine kinase activity
C5_01940W_A	-0.808331	0.0202462	SWR1	Component of the SWR1 complex, which has a role in exchanging histone variant H2AZ for histone H2A in chromatin; required for proper nucleosome positioning on WOR1 promoter
C2_09390W_A	-0.806665	0.00973388		Has domain(s) with predicted Rho guanyl-nucleotide exchange factor activity, role in regulation of Rho protein signal transduction and intracellular localization
C3_03230C_A	-0.806432	0.0115919		BAR domain-containing protein, forms heterodimer with Rvs162p that binds liposomes in vitro; flow model biofilm induced
C1_01370C_A	-0.806222	0.0325754	PDS5	Putative protein with a predicted role in establishment and maintenance of sister chromatid condensation and cohesion; cell-cycle regulated periodic mRNA expression
C1_04770C_A	-0.804201	0.0139789		Protein of unknown function; induced by alpha pheromone in SpiderM medium
C1_11650W_A	-0.8026	0.0118609	PHO86	Putative endoplasmic reticulum protein; possibly adherence-induced
C3_02310W_A	-0.802375	0.0493725		Protein of unknown function; Spider biofilm induced
C4_06280C_A	-0.802239	0.0298949	RAD57	Putative DNA recombination and repair protein; induced by interaction with macrophage; transcript is regulated by Nrg1, Mig1, and Tup1; essential protein; S. cerevisiae ortholog is essential
CR_00780C_A	-0.800927	0.0325798	MAF1	Putative negative regulator of RNA polymerase III; decreased expression in hyphae vs yeast cells; caspofungin repressed; Spider biofilm repressed
CR_05480W_A	-0.799366	0.00276273		Ortholog of C. dubliniensis CD36 : Cd36_22330, C. parapsilosis CDC317 : CPAR2_805720, Candida tropicalis MYA-3404 : CTRG_01814 and Candida albicans WO-1 : CAWG_05906
C4_04310W_A	-0.798871	0.0418914	OPT5	Oligopeptide transporter; fungal-specific (no human or murine homolog); induced by BSA, but not by tetrapeptide or pentapeptide
CR_07530C_A	-0.798407	0.0497415	RSP5	Putative NEDD4 family E3 ubiquitin ligase; induced during infection of murine kidney, compared to growth in vitro; has murine homolog; possibly an essential gene, disruptants not obtained by UAU1 method
C1_08490W_A	-0.79763	0.00335939		Possible pseudogene; similar to Ywp1p; ORF extended upstream from the initiating Met of orf19.3621 has a stop codon in the region corresponding to the Ywp1p signal peptide; disruption causes no apparent phenotype; no expression detected
CR_05830C_A	-0.797611	0.00698603		Ortholog(s) have Ino80 complex localization
C5_04260W_A	-0.797127	0.0451773		Protein of unknown function; flow model biofilm induced
CR_03310C_A	-0.795852	0.00391804	RPT6	Putative ATPase of the 19S regulatory particle of the 26S proteasome; transcript regulated by Mig1; regulated by Gcn2 and Gcn4
C2_03800C_A	-0.794578	0.00624636	JEM1	Functional homolog of S. cerevisiae Jem1p, which acts with Scj1p and Kar2p (BiP) in protein folding and ER-associated degradation of misfolded proteins, and also has a role in karyogamy; has J domain and 4 tetratricopeptide repeats
C2_10580W_A	-0.794092	0.0448571	IPP1	Putative inorganic pyrophosphatase; antigenic; soluble protein in hyphae; macrophage-induced protein; protein present in exponential and stationary phase yeast; possibly essential (UAU1 method); sumoylation target; Spider biofilm repressed
CR_07070C_A	-0.793553	0.0357496		Predicted 2-hydroxyacid dehydrogenase; Hap43-repressed gene
C1_05720W_A	-0.793332	0.0123067		Putative serine/threonine protein kinase; Hap43-repressed; induced by prostaglandins; possibly an essential gene, disruptants not obtained by UAU1 method; flow model biofilm induced; Spider biofilm induced
C2_06600W_A	-0.793001	0.0367922	DFG10	Ortholog(s) have role in dolichol biosynthetic process, dolichol-linked oligosaccharide biosynthetic process, pseudohyphal growth
C4_03540C_A	-0.792915	0.02774		Protein of unknown function; unmerged from orf19.202 in a revision of Assembly 21
C1_08140W_A	-0.789368	0.0128202		Putative glycerol-3-phosphate acyltransferase; Hog1-repressed
CR_08370W_A	-0.787814	0.0075518		Ortholog of C. dubliniensis CD36 : Cd36_23270
C1_00180W_A	-0.78648	0.0257946	GLO2	Ortholog(s) have hydroxyacylglutathione hydrolase activity, role in methylglyoxal catabolic process to D-lactate via S-lactoyl-glutathione and cytoplasm localization
C6_00500C_A	-0.786399	0.00330255	ABG1	Vacuolar membrane protein; depletion causes abnormal vacuolar morphology, cell separation defect, sensitivity to cell wall stress, increased hyphal branching; essential, no mammalian homolog; Cyr1-regulated; rat catheter biofilm repressed
CR_05160C_A	-0.785536	0.0338979	ERG24	C-14 sterol reductase, has a role in ergosterol biosynthesis; mutation confers increased sensitivity to dyclonine; rat catheter and Spider biofilm repressed
C1_04910C_A	-0.785264	0.00827673	PMS1	Putative DNA mismatch repair factor; ortholog of S. cerevisiae PMS1 which is an ATP-binding protein involved in DNA mismatch repair
C2_05480C_A	-0.785143	0.0328966		Predicted tRNA dihydrouridine synthase; Spider biofilm induced
C2_03450W_A	-0.783642	0.027178	CCT2	Chaperonin of the cytosolic TCP1 ring complex; protein present in exponential and stationary-phase yeast cells, but higher amounts in stationary phase; GlcNAc-induced protein
C6_01850W_A	-0.78173	0.00550159		Protein with similarity to trimeric LpxA-like enzymes; Hap43-repressed gene
C3_07000W_A	-0.780548	0.00520209	PMI1	Phosphomannose isomerase; cell wall biosynthesis enzyme; drug target; functional homolog of S. cerevisiae, E. coli phosphomannose isomerase; Gcn4-regulated; induced on adherence to polystyrene, phagocytosis; 3-AT, Spider biofilm repressed
C1_03020C_A	-0.780384	0.0236781		Putative 66S pre-ribosomal particle component; Hap43-induced; F-12/CO2 early biofilm induced
C7_00910C_A	-0.780056	0.00908535		Ortholog(s) have SNAP receptor activity and role in endoplasmic reticulum to Golgi vesicle-mediated transport, retrograde vesicle-mediated transport, Golgi to endoplasmic reticulum, vesicle fusion
CR_04580W_A	-0.776859	0.0360435		Ortholog of S. cerevisiae/S. pombe Lsb5; predicted role in actin cortical patch localization, actin filament organization, endocytosis; flow model biofilm induced; Spider biofilm repressed
C2_02690W_A	-0.776549	0.00685993		Protein of unknown function; expression regulated by white-opaque switch; repressed by alpha pheromone in SpiderM medium
CR_08290W_A	-0.776544	0.0147993		Protein with predicted peptidase domains; Hap43-repressed gene
C3_07850W_A	-0.776257	0.0126091		Ortholog of S. pombe Stm1 G-protein coupled receptor; PQ-loop domains; constitutive expression independent of MTL or white-opaque status; Hap43-repressed
C1_10700C_A	-0.771698	0.00667762		Ortholog(s) have protein-containing complex binding activity, role in sporulation resulting in formation of a cellular spore, ubiquitin-dependent ERAD pathway and extrinsic component of membrane, nucleus localization
C1_03000W_A	-0.769835	0.0169086	FCY21	High affinity, high capacity, hypoxanthine-adenine-guanine-cytosine/H+ symporter; similar to S. cerevisiae Fcy2; mutation confers resistance to 5-fluorocytosine (5-FC); flow model biofilm induced
C2_03900C_A	-0.769789	0.00651252		Ortholog(s) have thiosulfate sulfurtransferase activity and role in tRNA wobble position uridine thiolation, tRNA wobble uridine modification
C5_05390C_A	-0.768426	0.0364711		Membrane-localized protein of unknown function
C5_05320C_A	-0.767057	0.0119401		Putative pantetheine-phosphate adenylyltransferase (PPAT); which catalyzes 4th step in coenzyme A biosynthesis from pantothenate; rat catheter biofilm repressed
C7_03650W_A	-0.766187	0.0127043		Predicted dehydrogenase; transcript upregulated in an RHE model of oral candidiasis; virulence-group-correlated expression; Spider biofilm repressed
C2_10630W_A	-0.766116	0.0166364	CWC22	Predicted spliceosome-associated protein; role in pre-mRNA splicing; Spider biofilm induced
C3_01820W_A	-0.765958	0.04975		Secreted protein; fluconazole-induced
C6_02120W_A	-0.765766	0.00654267	RAS1	RAS signal transduction GTPase; regulates cAMP and MAP kinase pathways; role in hyphal induction, virulence, apoptosis, heat-shock sensitivity; nonessential; plasma membrane-localized; complements viability of S. cerevisiae ras1 ras2 mutant
C1_08760W_A	-0.765614	0.0350943		Protein similar to S. cerevisiae meiosis-specific, spore-wall-localized protein Ssp2p, which is required for wild-type outer spore wall formation in S. cerevisiae; possibly an essential gene (UAU1 method); Hap43p-repressed
C1_00320W_A	-0.764708	0.0152456	ACS1	Acetyl-CoA synthetase; induced by human neutrophils; fluconazole-repressed; regulated by Nrg1/Mig1; colony morphology-related gene regulation by Ssn6; only in stationary phase cultures; rat catheter biofilm repressed, Spider biofilm induced
C6_00360C_A	-0.763951	0.0206728	FGR29	Protein lacking an ortholog in S. cerevisiae; transposon mutation affects filamentous growth; rat catheter biofilm repressed
C1_09230C_A	-0.763463	0.00296781	RAD1	Putative single-stranded DNA endonuclease; transcript regulated by Nrg1; macrophage-induced gene
C1_06650W_A	-0.763356	0.021545	NCE4	Putative RecQ-mediated genome instability protein; Hap43-repressed gene; periodic mRNA expression, peak at cell-cycle G2/M phase; flow model biofilm induced
C2_06210C_A	-0.762793	0.0231735	UBC15	Putative E2 ubiquitin-conjugating enzyme
CR_06700C_A	-0.761646	0.00878339	RPS4A	Predicted ribosomal protein, component of the small ribosomal subunit; repressed upon phagocytosis by murine macrophage; positively regulated by Tbf1; mutant is defective in filamentous growth and sensitive to osmotic stress
C3_07330W_A	-0.761047	0.0281075		Ortholog(s) have cytosol, extracellular region localization
C2_10210C_A	-0.760753	0.00229071		Ortholog of C. dubliniensis CD36 : Cd36_24630, C. parapsilosis CDC317 : CPAR2_407790, Candida tropicalis MYA-3404 : CTRG_02045, Candida albicans WO-1 : CAWG_06134 and Candida metapsilosis : CMET_2127
C6_03080C_A	-0.760745	0.0108208	ETR1	Putative 2-enoyl thioester reductase; protein present in exponential and stationary growth phase yeast cultures; rat catheter biofilm repressed
C3_05470W_A	-0.75817	0.0326576		Predicted integral membrane protein; Spider biofilm induced
C2_06490W_A	-0.757352	0.0207942	BNA4	Putative kynurenine 3-monooxygenase, involved in NAD biosynthesis; transposon mutation affects filamentous growth; Hap43p-repressed gene; oral infection upregulated; mutants have reduced capacity to damage oral epithelial cells
C4_06340W_A	-0.756892	0.0189506	RPT2	Putative ATPase of the 19S regulatory particle of the 26S proteasome; oxidative stress-induced via Cap1; Spider biofilm repressed
C3_07020W_A	-0.756393	0.00761062		Putative ubiquitin-protein ligase; role in protein sumoylation, protein ubiquitination; Spider biofilm induced
C1_09480W_A	-0.754909	0.0305225	UTP8	Essential nucleolar protein; involved in tRNA export from the nucleus and ribosomal small subunit biogenesis; physically interacts with TAP-tagged Nop1; Spider biofilm induced
C1_01790W_A	-0.754673	0.0179639		Ortholog(s) have protein folding chaperone activity, role in mitochondrial respiratory chain complex III assembly and mitochondrial matrix, mitochondrion localization
C2_02420C_A	-0.753921	0.0299045	BUD21	Small-subunit processome component; repressed by prostaglandins
C4_03230C_A	-0.753254	0.00542752		Putative Golgi membrane protein with a predicted role in manganese homeostasis; Hap43p-repressed gene; clade-associated gene expression
C7_03340C_A	-0.752189	0.0442308		Ortholog(s) have role in mRNA splicing, via spliceosome and Prp19 complex, spliceosomal complex localization
C4_01510W_A	-0.75183	0.0140475		Ortholog(s) have NEDD8 transferase activity and role in protein neddylation
C1_10530W_A	-0.751531	0.0128651		Ortholog(s) have microtubule binding, microtubule plus-end binding activity
C2_05410W_A	-0.751155	0.0371187		Putative conserved oligomeric Golgi complex subunit; decreased transcription is observed upon fluphenazine treatment
C1_00470C_A	-0.750167	0.00397426	SWD1	Ortholog(s) have histone methyltransferase activity (H3-K4 specific) activity
C1_04420C_A	-0.749716	0.00549509		Putative peptidyl-prolyl cis-trans isomerase
C6_04650W_A	-0.748513	0.00857735	FLC1	Protein involved in heme uptake; putative FAD transporter, similar to S. cerevisiae Flc1; regulated by iron; macrophage-induced; mutant defective in filamentous growth; Spider biofilm induced
C1_01480C_A	-0.747346	0.0224661		Ortholog of S. cerevisiae : YGL138C, C. glabrata CBS138 : CAGL0H08910g, C. dubliniensis CD36 : Cd36_80910, C. parapsilosis CDC317 : CPAR2_102230 and C. auris B8441 : B9J08_002616
C2_03830W_A	-0.74612	0.00909517		Protein of unknown function; induced by Mnl1 under weak acid stress
C1_02650W_A	-0.7421	0.00530095		HMG-box protein; Spider biofilm repressed
CR_09770C_A	-0.740329	0.00466227		Putative transcription factor with zinc finger DNA-binding motif
C2_06810C_A	-0.739768	0.0184533		Ortholog(s) have role in response to purine-containing compound
C4_05450C_A	-0.739661	0.0082442	ALI1	Putative NADH-ubiquinone oxidoreductase; in detergent-resistant membrane fraction (possible lipid raft component); predicted N-terminal acetylation; nitric oxide-repressed; plasma membrane-localized; protein decreases in stationary phase
C2_10060C_A	-0.739342	0.0445624		Protein of unknown function; Spider biofilm induced
C6_02580W_A	-0.738619	0.0317147	RPS7A	Ribosomal protein S7; genes encoding cytoplasmic ribosomal subunits, translation factors, and tRNA synthetases are downregulated upon phagocytosis by murine macrophage; Spider biofilm repressed
C3_03290C_A	-0.736478	0.0288307		Ortholog(s) have role in cytoplasmic translation, poly(A)+ mRNA export from nucleus and cytoplasm localization
C3_07920W_A	-0.736079	0.00761062		Has domain(s) with predicted phosphotransferase activity, alcohol group as acceptor activity and role in carbohydrate metabolic process
CR_08430W_A	-0.735419	0.0113347		Ortholog of C. dubliniensis CD36 : Cd36_81550, C. parapsilosis CDC317 : CPAR2_503570, C. auris B8441 : B9J08_001894 and Candida tenuis NRRL Y-1498 : cten_CGOB_00261
C2_02990C_A	-0.7354	0.0069481		Predicted potassium ion transporter; Spider biofilm induced
C2_08110W_A	-0.735148	0.0138976	AFG3	Similar to S. cerevisiae Afg3p, a subunit of the mitochondrial inner membrane m-AAA protease; likely to be essential for growth, based on an insertional mutagenesis strategy
C5_01765C_B	-0.734241	0.0107714		Protein of unknown function; expression downregulated in an ssr1 null mutant
C6_00430C_A	-0.732891	0.00654267		Ortholog(s) have cell cortex localization
C3_02410C_A	-0.731585	0.042717	PMP3	Ortholog(s) have phosphatidic acid binding, phosphatidylinositol-3,5-bisphosphate binding, phosphatidylinositol-3-phosphate binding, sphingolipid binding activity
C3_04910C_A	-0.73096	0.00857735		Ortholog(s) have role in ascospore wall assembly
C3_05370C_A	-0.727652	0.0161309		Has domain(s) with predicted zinc ion binding activity, role in endoplasmic reticulum to Golgi vesicle-mediated transport, intracellular protein transport and COPII vesicle coat localization
C2_05490W_A	-0.727265	0.0260477		Deoxyhypusine synthase; catalyzes formation of deoxyhypusine, the first step in hypusine biosynthesis; Spider biofilm repressed
CR_05890C_A	-0.726311	0.00398622		Putative ubiquinone oxidoreductase; repressed by nitric oxide; Hap43p-repressed
C2_08500W_A	-0.724472	0.00911951	MEP1	Ammonium permease; Mep1 more efficient permease than Mep2, Mep2 has additional regulatory role; 11 predicted transmembrane regions; low mRNA abundance; hyphal downregulated; flow model biofilm induced
C1_11010C_A	-0.723531	0.0134418	ILV2	Putative acetolactate synthase; regulated by Gcn4p; induced by amino acid starvation (3-AT treatment); stationary phase enriched protein
C3_06140W_A	-0.723097	0.0463377		Putative protein of unknown function, transcription is activated in the presence of elevated CO2
C3_04520C_A	-0.722932	0.00918892		Protein of unknown function; Plc1-regulated
CR_09050C_A	-0.722783	0.0197922	COX7	Putative cytochrome c oxidase; flucytosine induced; repressed by nitric oxide
CR_05900W_A	-0.721607	0.00555909		Ortholog(s) have ubiquitin-protein transferase activity, role in ubiquitin-dependent protein catabolic process and chromosome, centromeric region, site of double-strand break localization
C1_12920C_A	-0.721411	0.00650877	APL2	Phosphorylated protein of unknown function; mutation confers hypersensitivity to toxic ergosterol analog
C1_11040W_A	-0.720017	0.0493272	RPL9B	Ribosomal protein L9; repressed upon phagocytosis by murine macrophages; repressed by nitric oxide; protein levels decrease in stationary phase; Hap43-induced; Spider biofilm repressed
CR_03080C_A	-0.719099	0.0140475		Putative ATP-dependent helicase; induced by nitric oxide
C6_01100W_A	-0.717225	0.0407043	PAM17	Predicted component of the presequence translocase-associated import motor (PAM complex) involved in protein import into mitochondrial matrix
CR_05560W_A	-0.716752	0.00335939	YSY6	Protein involved in ER stress response; acts synergistically with Aut7p to regulate unfolded protein response and mitochondrial function under ER stress
C4_02090C_A	-0.716576	0.00542752	APL5	Ortholog of S. cerevisiae and S. pombe Apl5; subunit of the AP-3 adaptor complex involved in Golgi-to-vacuole transport; phosphorylated protein; mutant is viable;
C2_00280C_A	-0.716448	0.0177109	SLC1	Putative fatty acyltransferase; protein repressed during the mating process
CR_08000C_A	-0.716352	0.0028002		Protein of unknown function; S. cerevisiae ortholog Fmp37 which localizes to mitochondria; Hap43-repressed; Spider biofilm repressed
CR_02620C_A	-0.715067	0.012977		Protein of unknown function; Hog1p-repressed; Spider biofilm induced
C6_01390W_A	-0.713109	0.00620969	ZCF1	Zn(II)2Cys6 transcription factor; transcript regulated during hypha formation; 5'-UTR intron; mutants show decreased colonization of mouse kidneys; flow model biofilm induced; Spider biofilm induced
C1_09470C_A	-0.71158	0.00514129		Protein of unknown function; gene has intron; Spider biofilm induced
C2_10350C_A	-0.711165	0.0431397		Ortholog(s) have role in DNA repair, transcription-coupled nucleotide-excision repair and Ddb1-Ckn1 complex localization
C2_05610C_A	-0.710856	0.0164456	ADH4	Predicted 3-hydroxyacyl-CoA dehydrogenase; transcript is increased in azole-resistant strain overexpressing MDR1; transcript is increased in populations of cells exposed to fluconazole over multiple generations; mutant is viable
CR_04020C_A	-0.710704	0.0288472	FAA21	Predicted acyl CoA synthetase; upregulated upon phagocytosis; transcript regulated by Nrg1 and Mig1
C4_01720C_A	-0.7098	0.0195003	NSG2	Protein involved in regulation of C14-methylated sterol biosynthesis; mutations increase azole sensitivity
C4_00770C_A	-0.709406	0.04975		Ortholog of S. cerevisiae Igo2; role in mRNA stabilization of mRNA; Spider biofilm induced
C3_05200W_A	-0.708609	0.0203871	DTD2	Ortholog(s) have D-leucyl-tRNA(Leu) deacylase activity, D-tyrosyl-tRNA(Tyr) deacylase activity and role in D-leucine catabolic process, D-tyrosine catabolic process, tRNA metabolic process
C6_04360C_A	-0.708316	0.00560908	AIP2	Putative actin interacting protein; regulated by Gcn4; induced in response to amino acid starvation (3-AT); repressed by elevated CO2; flow model biofilm repressed
C6_03390W_A	-0.708131	0.0375504		Putative transporter similar to MDR proteins; fungal-specific; Spider biofilm induced
CR_07560W_A	-0.70605	0.00979056		Protein of unknown function; upregulated in a cyr1 null mutant
C2_00190C_A	-0.705896	0.00938532	DAL5	Allantoate permease; nitrogen catabolite repressed, induced in absence of preferred N sources; nitrogen source regulation requires Gat1; possibly essential gene (by UAU1 method); Hap43-repressed
C3_03180C_A	-0.70589	0.00823484	SEC13	Putative protein transport factor; antigenic during murine systemic infection; macrophage-downregulated protein; protein level decreases in stationary phase cultures; Spider biofilm repressed
CR_03810W_A	-0.704233	0.0416829	PNP1	Purine nucleoside phosphorylase; metabolizes inosine and guanosine nucleosides; in the nicotinamide riboside salvage pathway; Spider biofilm repressed
C2_10430C_A	-0.703461	0.025545		Ortholog(s) have L-methionine transmembrane transporter activity and role in methionine import across plasma membrane
C4_06760W_A	-0.703013	0.0214287	NPR2	Putative urea transporter; induced during infection of murine kidney, compared to growth in vitro; has murine homolog
C7_03440W_A	-0.702387	0.00568633	RUB1	Ubiquitin-related protein with similarity to mammalian NEDD8; reversible conjugation (neddylation) of the cullin subunit (Cdc53p) modulates the ubiquitin ligase activity of the SCF complexes
C4_04290W_A	-0.702173	0.00514129	FCY2	Purine-cytosine permease of pyrimidine salvage; mutation associated with resistance to flucytosine in clinical isolates; transposon mutation affects filamentation; farnesol-upregulated in biofilm
C1_00580W_A	-0.701838	0.0317379	YAH1	Protein similar to oxidoreductases; induced in high iron; Hap43-repressed
C4_05880W_A	-0.70005	0.0304978	VTI1	Ortholog(s) have SNAP receptor activity and role in Golgi to vacuole transport, intra-Golgi vesicle-mediated transport, macroautophagy, vacuole fusion, non-autophagic, vesicle fusion
C2_00200W_A	-0.700017	0.0305663	NDE1	Putative NADH dehydrogenase; may act alternatively to complex I in respiration; caspofungin repressed; rat catheter biofilm induced; Spider biofilm repressed
C4_01930C_A	-0.698563	0.010813		Protein of unknown function; upregulated by fluphenazine treatment or in an azole-resistant strain that overexpresses CDR1 and CDR2; transcript possibly regulated by Tac1
C1_13680C_A	-0.697917	0.0140475	RSN1	Protein of unknown function; flow model biofilm induced; Spider biofilm induced; induced during the mating process; Hap43-repressed
C1_10090C_A	-0.695416	0.00827673	PRE9	Alpha3 (C9) subunit of the 20S proteasome; transcript regulated by Mig1; flow model biofilm repressed
CR_00540C_A	-0.691979	0.0181997		Ortholog of S. cerevisiae : MAY24, C. glabrata CBS138 : CAGL0L08382g, C. dubliniensis CD36 : Cd36_83540, C. parapsilosis CDC317 : CPAR2_404520 and C. auris B8441 : B9J08_002269
C3_07880C_A	-0.689681	0.0220793		Has domain(s) with predicted oxidoreductase activity and role in oxidation-reduction process
C3_07380W_A	-0.688245	0.0490503	CCC1	Manganese transporter; required for normal filamentous growth; mRNA binds She3, localized to hyphal tips; repressed by NO, alkaline pH; colony morphology-related regulation by Ssn6; regulated by Sef1, Sfu1, Hap43; Spider biofilm induced
C1_10230C_A	-0.687955	0.0229871	RAD53	Protein involved in regulation of DNA-damage-induced filamentous growth; putative component of cell cycle checkpoint; ortholog of S. cerevisiae Rad53p, protein kinase required for cell-cycle arrest in response to DNA damage
C2_07140W_A	-0.687878	0.0154303		Ortholog of C. parapsilosis CDC317 : CPAR2_502850, Candida tenuis NRRL Y-1498 : CANTEDRAFT_135869, Debaryomyces hansenii CBS767 : DEHA2F18260g and Pichia stipitis Pignal : psti_CGOB_00119
C4_01690C_A	-0.686682	0.0380777		Ortholog(s) have chromatin binding activity, role in RNA polymerase II preinitiation complex assembly, transcription by RNA polymerase II and transcription factor TFIID complex localization
CR_04470W_A	-0.685645	0.0371306		Protein of unknown function; Spider biofilm induced
CR_00340C_A	-0.685636	0.0479369		Ortholog of subunit 6 of the ubiquinol cytochrome-c reductase complex, a component of the mitochondrial inner membrane electron transport chain; Hap43-repressed gene
C1_12160W_A	-0.681028	0.0173468	MBP1	Putative component of the MBF transcription complex involved in G1/S cell-cycle progression; non-periodic mRNA expression; predicted, conserved MBF binding sites upstream of G1/S-regulated genes
C3_05090C_A	-0.680548	0.0416955		Ortholog of C. dubliniensis CD36 : Cd36_84070, C. parapsilosis CDC317 : CPAR2_102720, Candida tenuis NRRL Y-1498 : CANTEDRAFT_98617 and Debaryomyces hansenii CBS767 : DEHA2D07392g
CR_09790W_A	-0.680203	0.0134757	DAL8	Putative allantoate permease; fungal-specific (no human or murine homolog)
C6_01080C_A	-0.679996	0.0494532	URK1	Protein similar to uridine kinase; repressed by ciclopirox olamine; Spider biofilm induced
C1_03450C_A	-0.679481	0.0154419	POL1	Putative DNA directed DNA polymerase alpha; RNA abundance regulated by cell cycle, tyrosol and cell density; rat catheter biofilm induced
C1_09030C_A	-0.679307	0.0260218		Ortholog of C. dubliniensis CD36 : Cd36_84250, C. parapsilosis CDC317 : CPAR2_806160, Candida tenuis NRRL Y-1498 : CANTEDRAFT_137075 and Debaryomyces hansenii CBS767 : DEHA2F11462g
C6_03340C_A	-0.678668	0.0269869		Protein of unknown function; Cyr1-repressed; induced by alpha pheromone in SpiderM medium; rat catheter and Spider biofilm induced
C3_00390W_A	-0.677753	0.0499136		Putative voltage-gated chloride channel; predicted role in copper ion and iron ion homeostasis; flow model biofilm induced
C2_05380W_A	-0.677195	0.04975		Protein of unknown function; induced by alpha pheromone in SpiderM medium
CR_06300C_A	-0.676926	0.00834771	ADE2	Phosphoribosylaminoimadazole carboxylase; role in adenine biosynthesis; required for normal growth and virulence in immunosuppressed mouse infection; not induced in GCN response, in contrast to S. cerevisiae ADE2; stationary phase-enriched
C2_00520W_A	-0.6762	0.0126898	CMK1	Putative calcium/calmodulin-dependent protein kinase II; expression regulated upon white-opaque switching; biochemically purified Ca2+/CaM-dependent kinase is soluble, cytosolic, monomeric, and serine-autophosphorylated; Hap43p-repressed
C3_06860C_A	-0.675867	0.0149253	ARV1	Lipid transporter involved in sterol trafficking and transport of glycosylphosphatidylinositol and sphingolipid precursors
CR_03460W_A	-0.675449	0.0198053		Ortholog(s) have DNA topoisomerase activity, DNA topoisomerase type I (single strand cut, ATP-independent) activity
C3_03040W_A	-0.675083	0.0391064		Ortholog(s) have role in endoplasmic reticulum to Golgi vesicle-mediated transport and COPII-coated ER to Golgi transport vesicle, integral component of Golgi membrane, integral component of endoplasmic reticulum membrane localization
C4_04550C_A	-0.672176	0.0109647		Zinc finger protein orthologous to S. cerevisiae Itt1; repressed by adherence to polystyrene; Spider biofilm induced
CR_05120W_A	-0.670712	0.00943054		Protein of unknown function; transcript upregulated in an RHE model of oral candidiasis; rat catheter and Spider biofilm repressed
C2_09960W_A	-0.670064	0.0149989		Ortholog(s) have ubiquitin ligase activator activity
C4_05960W_A	-0.669139	0.0139789	NCE102	Non classical protein export protein; localized to plasma membrane; Hap43-induced gene; flow model biofilm induced; Spider biofilm induced
C4_04710W_A	-0.667886	0.0231735	ARF2	Essential protein, putative ADP-ribosylation factor; involved in invasive growth; mutation confers hypersensitivity to Brefeldin A; Spider biofilm repressed
C1_06450C_A	-0.667457	0.026812	RPL35	Ribosomal protein; downregulation correlates with clinical development of fluconazole resistance; colony morphology-related gene regulation by Ssn6; Hap43-induced; Spider biofilm repressed
C7_03350C_A	-0.664365	0.0086065	RDI1	Putative rho GDP dissociation inhibitor; transposon mutation affects filamentous growth; farnesol, filament-induced; regulated by Nrg1, Tup1; protein levels low in stationary phase yeast
CR_03070W_A	-0.663365	0.0319069	CEM1	Protein similar to S. cerevisiae Cem1p, an acyl carrier protein involved in fatty acid biosynthesis; likely to be essential for growth, based on an insertional mutagenesis strategy
C5_03040W_A	-0.662865	0.049087		Has domain(s) with predicted oxidoreductase activity, transferase activity, transferring acyl groups other than amino-acyl groups, zinc ion binding activity and role in oxidation-reduction process
C2_07820C_A	-0.66284	0.0392856		Protein of unknown function; Hap43-repressed gene
C3_02600C_A	-0.662474	0.0323481	RPL18	Predicted ribosomal protein; Plc1p-regulated, Tbf1-activated; repressed upon phagocytosis by murine macrophage; Hap43p-induced; Spider biofilm repressed
C1_03400W_A	-0.660519	0.00802916	THI4	Thiamine biosynthetic enzyme precursor; repressed during the mating process; stationary phase enriched protein; Spider biofilm induced
CR_02260C_A	-0.660487	0.0211972		Ortholog(s) have tRNA (guanine-N2-)-methyltransferase activity, role in tRNA methylation and cytoplasm, tRNA (m2G10) methyltransferase complex localization
C4_01710C_A	-0.659636	0.00863816	RHB1	Putative small G protein from the Ras superfamily involved in cell wall integrity and control of filamentous growth under nitrogen starvation; involved in activation of TOR1C during starvation response
CR_10490W_A	-0.658576	0.00729213	MCA1	Putative metacaspase, cysteine protease involved in apoptosis in response to stresses; has similarity to S. cerevisiae Mca1p; fungal-specific (no human or murine homolog); farnesol-induced
C1_06580W_A	-0.658515	0.0463735	RPS19A	Putative ribosomal protein S19; protein level decreases in stationary phase cultures; Spider biofilm repressed
C1_10870W_A	-0.658005	0.0328531	RPL8B	Predicted ribosomal protein; regulated upon yeast-hypha switch; repressed upon phagocytosis by murine macrophage; Spider biofilm repressed
C4_00950C_A	-0.657763	0.00767211		Ortholog(s) have choline kinase activity, ethanolamine kinase activity and role in phosphatidylcholine biosynthetic process, phosphatidylethanolamine biosynthetic process
C1_02490C_A	-0.657014	0.0474643	YST1	Ribosome-associated protein; antigenic in mice; complements S. cerevisiae yst1 yst2 mutant; similar to laminin receptor; predicted S/T phosphorylation, N-glycosylation, myristoylation, Hap43-, Gcn4-regulated; Spider biofilm repressed
C3_02590W_A	-0.65521	0.0133702	TEA1	Putative transcription factor with zinc cluster DNA-binding motif; has similarity to S. cerevisiae Tea1p; Hap43p-repressed gene
C3_04360W_A	-0.654569	0.0166364	OST1	Alpha subunit of the oligosaccharyltransferase complex of the ER lumen; catalyzes asparagine-linked glycosylation of newly synthesized proteins; Spider biofilm repressed
CR_01720W_A	-0.653785	0.0235313	PRE3	Putative beta-1 proteasome subunit; macrophage-induced protein; regulated by Gcn2p and Gcn4p; GlcNAc-induced protein
C1_04560W_A	-0.653333	0.0165352	BAT22	Putative branched chain amino acid aminotransferase; regulated by Gcn4p; induced by farnesol treatment, GlcNAc, amino acid starvation (3-aminotriazole treatment); present in exponential and stationary growth phase yeast cultures
C1_09630W_A	-0.653128	0.0126898	LAC1	Ceramide synthase; required for biosynthesis of ceramides with C18:0 fatty acids, which serve as precursors for glucosylsphingolipids; caspofungin induced
C3_01680C_A	-0.65028	0.0244779		Has domain(s) with predicted N,N-dimethylaniline monooxygenase activity, NADP binding, flavin adenine dinucleotide binding activity and role in oxidation-reduction process
C4_00500W_A	-0.650164	0.0119395	MRR1	Putative Zn(II)2Cys6 transcription factor; regulator of MDR1 transcription; gain-of-function mutations cause upregulation of MDR1 (a plasma membrane multidrug efflux pump) and multidrug resistance; Hap43-induced
C6_00440C_A	-0.650043	0.039534	GDA1	Golgi membrane GDPase, required for wild-type O-mannosylation, not N-glycosylation; required for wild-type hyphal induction, cell wall, and cell surface charge; not required for HeLa cell adherence; functional homolog of S. cerevisiae Gda1p
C2_07500C_A	-0.649142	0.0178976		Protein of unknown function; Spider biofilm induced; Hap43-repressed
CR_05080W_A	-0.649009	0.0133702	MUB1	Predicted protein required for ubiquitination; role in meiosis, regulation of cell budding in S. cereviae; Spider biofilm induced
C1_10490W_A	-0.648938	0.00911951	ERV25	Component of COPII-coated vesicles; transcript induced upon filamentous growth; rat catheter biofilm repressed
C1_01700W_A	-0.648898	0.0281075	CYP5	Putative peptidyl-prolyl cis-trans isomerase; macrophage-downregulated protein level; protein level decrease in stationary phase cultures; predicted endoplasmic reticulum (ER) localization
C3_07180C_A	-0.64863	0.0460282		Ortholog(s) have role in endonucleolytic cleavage in 5'-ETS of tricistronic rRNA transcript (SSU-rRNA, 5.8S rRNA and LSU-rRNA), more
C1_03180W_A	-0.645974	0.0445143		Ortholog(s) have protein disulfide oxidoreductase activity, role in cellular protein-containing complex assembly, protein N-linked glycosylation and oligosaccharyltransferase complex localization
C1_11600W_A	-0.644046	0.0097518		Ortholog(s) have structural constituent of nuclear pore activity
C3_07010W_A	-0.642219	0.00943054		Putative protein of unknown function; Hap43p-repressed gene; ortholog of S. cerevisiae YJL218W
C2_03130W_A	-0.641483	0.0224661	UBA1	Ubiquitin-activating enzyme; protein level decreases in stationary phase cultures
CR_06820W_A	-0.641411	0.00718936	HST6	ABC transporter related to mammalian P-glycoproteins; functional homolog of S. cerevisiae Ste6p (a-pheromone transporter); required for mating of MTLa cells; a-type specific, not regulated during white-opaque or yeast-hyphal switching
C5_00780C_A	-0.640618	0.0302035		Ortholog of C. dubliniensis CD36 : Cd36_86630, Candida tropicalis NEW ASSEMBLY : CTRG1_05698 and Candida tropicalis MYA-3404 : CTRG_05698
C5_00660C_A	-0.639867	0.00995272		Protein of unknown function; flow model biofilm repressed
C6_03800C_A	-0.63945	0.013289	SLF1	Putative polysome-associated RNA binding protein; macrophage-induced gene
CR_03560W_A	-0.638893	0.00938532		Putative xylose and arabinose reductase; flow model biofilm induced; Spider biofilm repressed
C6_03820C_A	-0.638629	0.0224661	PMT2	Protein mannosyltransferase (PMT) with roles in hyphal growth and drug sensitivity; member of the PMT family which includes Pmt1p, Pmt2p, Pmt4p, Pmt5p, and Pmt6p; induced during cell wall regeneration; essential
C1_09770W_A	-0.637688	0.0271852	RPD31	Putative histone deacetylase; involved in regulation of white-opaque switch; Spider biofilm repressed
C4_01270W_A	-0.636411	0.030567	POS5	Protein similar to S. cerevisiae Pos5p, a mitochondrial NADH kinase involved in the oxidative stress response; planktonic growth-induced gene; likely to be essential for growth, based on an insertional mutagenesis strategy
C7_03330C_A	-0.636212	0.00772322	SSN6	Functional homolog of S. cerevisiae Cyc8/Ssn6; hyphal growth regulator; repressed during hyphal growth; Ssn6 and Tup1 regulate distinct sets of genes; overexpression or mutation causes avirulence in mouse IV infection; TPR motifs
C2_08860W_A	-0.63604	0.0211972	YSA1	Predicted Nudix hydrolase family member with ADP-ribose pyrophosphatase activity; role in metabolism of O-acetyl-ADP-ribose to AMP and acetylated ribose 5'-phosphate; rat catheter biofilm repressed
C6_04200C_A	-0.633658	0.013459		Ortholog(s) have enzyme activator activity
CR_08040W_A	-0.632562	0.0130681		Ortholog(s) have cargo receptor activity and role in ascospore formation, axial cellular bud site selection, endoplasmic reticulum to Golgi vesicle-mediated transport
C6_01910W_A	-0.632414	0.0253237	RPS12	Acidic ribosomal protein S12; regulated by Gcn4, activated by Tbf1; repressed by amino acid starvation (3-AT); protein abundance is affected by URA3 expression in CAI-4 strain background; sumoylation target; Spider biofilm repressed
CR_07010W_A	-0.632284	0.0107714	BMT1	Beta-mannosyltransferase, required for addition of the 1st beta-mannose residue to acid-stable fraction of cell wall phosphopeptidomannan; 9-gene family member; mutants induce higher levels of inflammatory cytokines in mouse dendritic cells
C2_04230W_A	-0.631465	0.0167797	GCD2	Putative translation initiation factor; genes encoding ribosomal subunits, translation factors, and tRNA synthetases are downregulated upon phagocytosis by murine macrophage
CR_03960C_A	-0.630735	0.0208767	ECM29	Putative scaffold protein; assists in association of the proteasome core particle with the regulatory particle; ortholog of S. cerevisiae Ecm29; transposon mutation affects filamentous growth; flow model biofilm repressed
C1_01540W_A	-0.630567	0.0235252	UBI4	Ubiquitin precursor (polyubiquitin) contains 3 tandem repeats of the ubiquitin peptide that are processed to individual units; transcript induced by stress; mRNA in yeast and mycelia at similar abundance; Spider biofilm induced
CR_09550C_A	-0.630041	0.0447472		Predcted glucose 1-dehydrogenase (NADP+); rat catheter biofilm repressed
C2_03080W_A	-0.629391	0.0461584		Protein with a predicted RING-type zinc finger; possibly an essential gene, disruptants not obtained by UAU1 method
C3_04110C_A	-0.629001	0.0082442		Ortholog(s) have acid phosphatase activity and role in dephosphorylation, intracellular sterol transport
C7_00860W_A	-0.628585	0.00943054		Ortholog(s) have phosphopentomutase activity and role in guanosine catabolic process, inosine catabolic process, purine ribonucleoside salvage
C3_02320W_A	-0.628544	0.0153271		Protein required for mitochondrial ribosome small subunit biogenesis; role in maturation of SSU-rRNA; Spider biofilm induced
C3_00950C_A	-0.628477	0.0203332		Ortholog(s) have thiamine phosphate phosphatase activity and role in phosphate ion transport
C1_09810W_A	-0.627039	0.0195522		Ortholog of S. cerevisiae : YCR016W, C. glabrata CBS138 : CAGL0L07832g, C. dubliniensis CD36 : Cd36_87480, C. parapsilosis CDC317 : CPAR2_808240 and C. auris B8441 : B9J08_001753
C7_01830W_A	-0.626445	0.0350943		Ortholog(s) have DNA binding, DNA secondary structure binding activity
CR_06150C_A	-0.623625	0.0493725		Putative serine hydrolase; Spider biofilm repressed
C7_01280C_A	-0.623617	0.0288002		Ortholog(s) have microtubule binding, microtubule plus-end binding activity
C7_01970C_A	-0.623188	0.0284042	SEC61	ER protein-translocation complex subunit; essential; 10 predicted transmembrane regions; chimeric mutant partially functionally complements S. cerevisiae sec61 defects; Spider biofilm repressed
C3_05300C_A	-0.623125	0.0373328		Protein of unknown function; Spider biofilm repressed
C3_07700W_A	-0.621782	0.00817077		Protein similar to Pichia anomala YDL054c and S. cerevisiae Ydl054cp; transmembrane regions predicted; Hap43p-repressed gene
CR_02670C_A	-0.620305	0.0139789		Protein of unknown function; Spider biofilm repressed
C1_03130C_A	-0.620285	0.00865617	TIM8	Predicted mitochondrial intermembrane space protein with role in protein import into mitochondrial inner membrane and cytosol
C1_14530W_A	-0.619612	0.0435182		possible pseudouridine monophosphate glycosidase; overlaps orf19.6185 and orf19.618; has intron; Spider biofilm repressed
C2_01490C_A	-0.619299	0.00624636	SRB1	Essential GDP-mannose pyrophosphorylase; makes GDP-mannose for protein glycosylation; functional in S. cerevisiae psa1; on yeast-form, not hyphal cell surface; alkaline induced; induced on adherence to polystyrene; Spider biofilm repressed
C3_03920W_A	-0.618119	0.0164068		Protein of unknown function; Plc1-regulated; transcript detected in high-resolution tiling arrays
C6_03150C_A	-0.617199	0.0233327		Ortholog of C. dubliniensis CD36 : Cd36_40110, C. parapsilosis CDC317 : CPAR2_402300, C. auris B8441 : B9J08_003539 and Candida tenuis NRRL Y-1498 : CANTEDRAFT_94507
CR_04040C_A	-0.61661	0.0229959		Putative protein of unknown function; Hap43p-repressed gene
C1_12180C_A	-0.616221	0.0159674	ECM7	Protein involved in control of calcium homeostasis and oxidative stress response; mutants show defects in hyphal growth
CR_06780W_A	-0.61593	0.0115919		Ortholog(s) have role in ascospore-type prospore membrane assembly, spore membrane bending pathway and cytoplasm, prospore membrane localization
C3_07250W_A	-0.61427	0.0122756		Has domain(s) with predicted 2 iron, 2 sulfur cluster binding, iron ion binding, oxidoreductase activity, oxidoreductase activity and acting on paired donors, more
CR_02930W_A	-0.614156	0.0139789		Ortholog(s) have ubiquitin-protein transferase activity and role in protein import into peroxisome matrix, protein polyubiquitination, protein ubiquitination
CR_07770C_A	-0.612063	0.013289		Ortholog(s) have chromatin binding activity
C1_03110W_A	-0.61089	0.0386954		Has domain(s) with predicted role in peptidyl-diphthamide biosynthetic process from peptidyl-histidine and cytoplasm localization
CR_05840W_A	-0.609944	0.026812		Ortholog(s) have ubiquitin-ubiquitin ligase activity and role in free ubiquitin chain polymerization, protein polyubiquitination, ubiquitin-dependent ERAD pathway, ubiquitin-dependent protein catabolic process
CR_03030C_A	-0.609811	0.0418914	PCT1	Putative choline-phosphate cytidylyl transferase, antigenic during human oral infection
C1_12170C_A	-0.608966	0.0445624		Ortholog(s) have phosphatase activity, phosphoprotein phosphatase activity, thiosulfate sulfurtransferase activity and role in dephosphorylation
C1_08180C_A	-0.608837	0.0145036		Protein with a predicted role in clathrin cage assembly; Hap43-repressed; Spider biofilm repressed
CR_08680C_A	-0.606292	0.0281847	SEC72	ER protein-translocation complex component; regulated by Gcn4p; repressed in response to amino acid starvation (3-aminotriazole treatment); sumoylation target
C2_02800W_A	-0.604758	0.0375949		Putative adhesin-like protein
C6_04030W_A	-0.603785	0.0110951	HIS5	Putative histidinol-phosphate aminotransferase; Gcn4p-regulated; protein present in exponential and stationary growth phase yeast cultures
C2_04490W_A	-0.603717	0.00807665	CSP2	Putative cell wall associated protein; C. albicans and C. dubliniensis specific gene highly induced during chlamydospore development in both species; localized to chlamydospore cell wall; Hap43-repressed; Spider biofilm induced
C1_12730W_A	-0.602981	0.0308735		Has domain(s) with predicted translation initiation factor activity and role in translational initiation
C1_02890C_A	-0.602127	0.0283508	MLH1	Putative mismatch repair protein; cell-cycle regulated periodic mRNA expression
C2_04950C_A	-0.602059	0.0220056		Ortholog(s) have SUMO transferase activity, role in DNA repair and Smc5-Smc6 complex localization
CR_07640C_A	-0.601635	0.0195003		Ortholog(s) have N(6)-L-threonylcarbamoyladenine synthase activity and role in mitochondrial tRNA threonylcarbamoyladenosine modification, tRNA threonylcarbamoyladenosine modification
C7_01870W_A	-0.600794	0.0175671		Putative secreted acid sphingomyelin phosphodiesterase; possible Kex2p substrate
C4_00590C_A	-0.597286	0.0115373		Putative phospholipase of patatin family; similar to S. cerevisiae Tgl3p; predicted Kex2p substrate
C2_06420C_A	-0.596387	0.0200495	BMT9	Beta-mannosyltransferase, 9-gene family that includes characterized genes BMT1, BMT2, BMT3, and BMT4 with roles in beta-1,2-mannosylation of cell wall phosphopeptidomannan; regulated by Sef1, Sfu1, Hap43; rat catheter biofilm repressed
C1_14040W_A	-0.596217	0.0126091		Protein of unknown function; Spider biofilm induced
C4_00570C_A	-0.595103	0.00943054	RPS6A	Ribosomal protein 6A; localizes to cell surface of yeast cells but not hyphae; repressed upon phagocytosis by murine macrophage; possibly essential; Hap43-induced; Spider biofilm repressed
C3_00980W_A	-0.594423	0.0409202	ILV6	Putative regulatory subunit of acetolacetate synthase; alkaline induced; regulated by Gcn2 and Gcn4; protein present in exponential and stationary growth phase yeast; Spider biofilm repressed
CR_00250W_A	-0.594235	0.0134418		Ortholog of C. dubliniensis CD36 : Cd36_41430, Candida tropicalis NEW ASSEMBLY : CTRG1_00187, Candida tropicalis MYA-3404 : CTRG_00187 and Candida albicans WO-1 : CAWG_03642
C6_00660C_A	-0.594153	0.0340843		Ortholog(s) have carbonyl reductase (NADPH) activity, oxidoreductase activity, serine 3-dehydrogenase activity
C1_09520C_A	-0.593764	0.00911951	RPL20B	Ribosomal protein L20; repressed upon phagocytosis by murine macrophage; alternatively spliced intron in 5' UTR; Hap43-induced; Spider biofilm repressed
C4_01870C_A	-0.59204	0.00650877	HRT2	Protein described as having a role in Ty3 transposition; repressed in hyphae; stationary phase enriched protein; rat catheter and Spider biofilm repressed
C1_09950C_A	-0.591937	0.00857735		Protein of unknown function; Spider biofilm repressed
C5_00080C_A	-0.591012	0.0347464		Ortholog(s) have role in cellular response to DNA damage stimulus, protein ubiquitination, telomere maintenance, transcription-coupled nucleotide-excision repair, ubiquitin-dependent protein catabolic process and nucleus localization
C1_03630W_A	-0.590103	0.0253002	TIM12	Predicted component of the TIM22 complex, involved in protein import into mitochondrial inner membrane; flow model biofilm induced
C1_02510W_A	-0.589948	0.021116		Putative dienelactone hydrolase; protein abundance is affected by URA3 expression in the CAI-4 strain background; protein present in exponential and stationary growth phase yeast cultures; rat catheter biofilm repressed
CR_09190C_A	-0.589729	0.0148818	ERG8	Putative phosphomevalonate kinase; enzyme of the mevalonate pathway of isoprenoid biosynthesis; transcript regulated by Nrg1; possible drug target; not conserved in H. sapiens
C1_11360W_A	-0.587517	0.0479369	ARL1	Putative GTPase in the late Golgi involved in regulation of polarized growth and secretion; mutation confers dose-dependent sensitivity to Brefeldin A
C1_01490W_A	-0.586126	0.0217161	DPM3	Dolichol-phosphate mannose synthase subunit, essential for enzyme activity; flow model biofilm repressed
C1_06360W_A	-0.585996	0.0171862		Protein of unknown function; possible mitochondrial protein; Spider biofilm induced
CR_04000W_A	0.585663	0.00551985		Putative F-actin-capping protein subunit beta; possibly an essential gene, disruptants not obtained by UAU1 method
C2_08750W_A	0.588219	0.0401649		Ortholog of C. dubliniensis CD36 : Cd36_41860, C. parapsilosis CDC317 : CPAR2_400440, C. auris B8441 : B9J08_002205 and Candida tenuis NRRL Y-1498 : CANTEDRAFT_103033
C1_01810C_A	0.589481	0.0407043		Ortholog(s) have role in U1 snRNA 3'-end processing, U4 snRNA 3'-end processing and U5 snRNA 3'-end processing, more
C4_03690C_A	0.59256	0.0346788	GPI14	Catalytic subunit of glycosylphosphatidylinositol-alpha 1,4 mannosyltransferase I, involved in GPI anchor biosynthesis; regulated by Tsa1p, Tsa1Bp under H2O2 stress conditions
C2_06820C_A	0.593911	0.0108591		Ortholog of C. dubliniensis CD36 : Cd36_42090, Debaryomyces hansenii CBS767 : DEHA2C14872g, Pichia stipitis Pignal : PICST_74821 and Candida tropicalis NEW ASSEMBLY : CTRG1_00174
C4_03170W_A	0.593924	0.0278355		Catechol 1,2-dioxygenase (1,2-CTD), involved in degradation of aromatic compounds; Spider biofilm induced
C3_00520W_A	0.595003	0.0107446		Ortholog of C. parapsilosis CDC317 : CPAR2_400095, C. dubliniensis CD36 : Cd36_42560, Candida tenuis NRRL Y-1498 : CANTEDRAFT_113280 and Lodderomyces elongisporus NRLL YB-4239 : LELG_04166
C2_04750W_A	0.595016	0.0328531	HFL2	HAP5-like; ortholog of S. cerevisiae Bur6, a heterodimeric NC2 transcription regulator complex subunit; flucytosine induced
C2_09470C_A	0.595121	0.0119395		Protein with a glucose/ribitol dehydrogenase family domain; mutants are viable
C4_01920W_A	0.597258	0.0426235		Putative plasma membrane protein; Plc1-regulated; Spider biofilm induced
CR_03600C_A	0.599261	0.022483	CGR1	Negative regulator of yeast-form growth; HSP70 family member; induced by growth cessation at yeast-hyphal transition or in planktonic growth; physically interacts with Msi3p; similar to rat anti-aging gene, SMP30, stationary phase enriched
C1_09270W_A	0.599405	0.0171306		Ortholog(s) have ATP binding, magnesium ion binding activity and role in eukaryotic translation initiation factor 2 complex assembly, positive regulation of translational initiation
C3_07260C_A	0.599451	0.0251757	RPC53	Ortholog(s) have RNA polymerase III activity, role in tRNA transcription by RNA polymerase III and RNA polymerase III complex localization
C4_03750C_A	0.601196	0.0263557		Ortholog(s) have D-loop DNA binding, Y-form DNA binding, double-stranded DNA binding, four-way junction DNA binding activity, role in reciprocal meiotic recombination and MutSgamma complex, nuclear chromosome localization
C6_02180W_A	0.602305	0.013154		Ortholog(s) have guanyl-nucleotide exchange factor activity and role in mature ribosome assembly
C2_10010C_A	0.602344	0.0108591		Specificity factor required for ubiquitination and sorting of specific cargo proteins at the multivesicular body; ortholog of S. cerevisiae Ear1; transcript regulated by iron; Ssr1-represssed; Spider biofilm induced
CR_01750C_A	0.602452	0.0070535		Ortholog(s) have ER membrane protein complex localization
C2_07520C_A	0.607169	0.0197207		Ortholog(s) have ubiquitin protein ligase activity, ubiquitin-protein transferase activity
C1_06920C_A	0.608964	0.0348947		Ortholog(s) have DNA-directed 5'-3' RNA polymerase activity, RNA polymerase I activity, RNA polymerase II activity, RNA polymerase III activity, RNA-directed 5'-3' RNA polymerase activity, zinc ion binding activity
CR_03280W_A	0.610157	0.0302068		Ortholog(s) have SUMO transferase activity, role in DNA repair and Smc5-Smc6 complex localization
CR_07660C_A	0.611512	0.0170375		ORF in retrotransposon Tca4; similar to Pol region of retrotransposons encoding reverse transcriptase, protease, integrase; downstream of RHD2, similar to the Gag region encoding nucleocapsid-like protein; rat catheter biofilm induced
C1_05140W_A	0.611706	0.0422125	RHD2	Predicted ORF in retrotransposon Tca4 with similarity to the Gag region encoding nucleocapsid-like protein; overlaps blocked reading frame orf19.2668.1; yeast-enriched transcript; rat catheter biofilm induced
C1_11440C_A	0.61344	0.0139789		Protein of unknown function; Hap43-repressed gene
C3_05190C_A	0.614619	0.0447041	DOT4	Protein similar to ubiquitin C-terminal hydrolase; localizes to cell surface of hyphal cells, but not yeast-form cells; repressed upon high-level peroxide; Hap43p-induced; rat catheter biofilm induced
C2_05320W_A	0.614625	0.0265944		Ortholog of Candida albicans WO-1 : CAWG_03459
C1_02750C_A	0.615478	0.00541027		Protein of unknown function; regulated by Tsa1, Tsa1B in minimal media at 37 degrees C
C1_13020C_A	0.61658	0.0318217	RBT1	Cell wall protein with similarity to Hwp1; required for virulence; predicted glycosylation; fluconazole, Tup1 repressed; farnesol, alpha factor, serum, hyphal and alkaline induced; Rfg1, Rim101-regulated
C2_05200C_A	0.617117	0.00948192		Ortholog of Candida albicans WO-1 : CAWG_03455
C1_10400C_A	0.617891	0.00761062	ECM38	Putative gamma-glutamyltransferase; alkaline upregulated; Spider biofilm induced; possibly an essential gene, disruptants not obtained by UAU1 method
C2_07280W_A	0.619049	0.0473377	SPO75	Ortholog(s) have role in ascospore formation, ascospore wall assembly
C4_07080C_A	0.61975	0.00943054		Ortholog(s) have role in nucleotide-excision repair
C2_09260C_A	0.620033	0.00837481		Has domain(s) with predicted role in RNA catabolic process and ribonuclease H2 complex localization
C4_02960W_A	0.621121	0.0263557		Predicted membrane transporter, member of the drug:proton antiporter (14 spanner) (DHA2) family, major facilitator superfamily (MFS)
C7_01420W_A	0.623119	0.0460282		Ortholog(s) have translation release factor activity, role in mitochondrial translation, mitochondrial translational termination, translational termination and mitochondrial inner membrane, mitochondrion localization
C4_00650W_A	0.623221	0.014885		Ortholog(s) have protein binding, bridging activity and role in proteasome regulatory particle assembly
C1_14550C_A	0.626347	0.0403176		Protein of unknown function; ORF added to Assembly 21 based on comparative genome analysis; protein detected by mass spec in stationary phase cultures
C5_02300C_A	0.626984	0.00570877	MET4	Putative transcription coactivator; predicted role in sulfur amino acid metabolism; required for yeast cell adherence to silicone substrate; Spider biofilm induced
C4_02950C_A	0.628435	0.00772322		Calnexin; integral membrane ER chaperone involved in folding and quality control of glycoproteins; caspofungin induced
C1_13810W_A	0.629792	0.0110951		Protein of unknown function
C2_04830W_A	0.629858	0.00988182		Ortholog(s) have role in mitochondrial respiratory chain complex IV assembly and integral component of mitochondrial inner membrane, integral component of mitochondrial membrane localization
CR_05450C_A	0.631783	0.0321109		Ortholog of C. dubliniensis CD36 : Cd36_43710, C. parapsilosis CDC317 : CPAR2_402940, C. auris B8441 : B9J08_005206 and Candida tenuis NRRL Y-1498 : CANTEDRAFT_114940
C7_00600C_A	0.633627	0.00753652		Predicted membrane transporter, member of the oxalate:formate antiporter (OFA) family, major facilitator superfamily (MFS)
C4_06780C_A	0.634138	0.0319314		Ortholog(s) have ureidoglycolate lyase activity
C4_00790C_A	0.6345	0.0329347		Ortholog(s) have protein binding, bridging activity and role in vesicle-mediated transport
C1_10210C_A	0.635169	0.0417143	SEC15	Exocyst subunit, involved in polarized growth; cellular bud tip-associated protein; interacts with Ras-related GTPase Rsr1p; ortholog of S. cerevisiae SEC15
C3_04950W_A	0.635411	0.0226359	COX11	Cytochrome oxidase assembly protein; transcript regulated by Nrg1; protein repressed during the mating process; Hap43-repressed gene; rat catheter biofilm induced
C3_06500W_A	0.635883	0.0185254		Ortholog of C. dubliniensis CD36 : Cd36_44020, C. parapsilosis CDC317 : CPAR2_302330, C. auris B8441 : B9J08_004187 and Candida tenuis NRRL Y-1498 : CANTEDRAFT_105448
C6_03630W_A	0.637081	0.0248163		Protein of unknown function; Spider biofilm induced
C1_13490C_A	0.638331	0.0479369		Ribosomal 60S subunit protein L22B; Spider biofilm repressed
C6_03950C_A	0.638561	0.0271852	ATG1	Putative protein serine/threonine kinase; predicted role in vesicle formation in autophagy and the cytoplasm-to-vacuole targeting (Cvt) pathway; Spider biofilm induced
C1_05470W_A	0.639004	0.00685993	SAP10	Secreted aspartyl protease; roles in adhesion, virulence (RHE model), cell surface integrity; distinct specificity from Sap9; at cell membrane and wall; GPI-anchored; induced in low iron; Tbf1-activated; Spider biofilm induced
C2_02370C_A	0.639412	0.0108208	OMA1	Putative metalloendopeptidase of mitochondrial inner membrane, involved in TOR-mediated signaling
C5_03670C_A	0.639453	0.00725103	RCE1	Putative Type II CAAX prenyl protease; induced during the mating process
C2_06720W_A	0.639509	0.0412277	GYP1	Putative Cis-golgi GTPase-activating protein; required for hyphen growth and virulence; transcript regulated by Nrg1, Mig1, and Tup1
C2_03910C_A	0.643139	0.00961845		Ortholog(s) have methylenetetrahydrofolate dehydrogenase (NAD+) activity, role in folic acid-containing compound biosynthetic process, one-carbon metabolic process, purine nucleobase biosynthetic process and cytosol localization
C3_04780C_A	0.643159	0.0119395		Ortholog(s) have chromatin DNA binding activity
C2_01840C_A	0.644597	0.00862673	CDL1	Putative RNAse III, ortholog of S. cerevisiae RNT1; merged with orf19.3772 in Assembly 21
CR_07600W_A	0.645012	0.00837481		Ortholog of C. dubliniensis CD36 : Cd36_44860, Candida tropicalis NEW ASSEMBLY : CTRG1_04054, Candida tropicalis MYA-3404 : CTRG_04054 and Candida albicans WO-1 : CAWG_03295
CR_08350W_A	0.6464	0.0145036	VPH1	Vacuolar H(+)-ATPase; transcription regulated by Nrg1, Mig1, and Tup1
C4_00800W_A	0.64767	0.0370568	XKS1	Putative xylulokinase; Hap43-repressed; induced by prostaglandins; rat catheter biofilm repressed
C1_00150C_A	0.647931	0.0334318		Ortholog(s) have phosphatidylinositol-3,5-bisphosphate binding, phosphatidylinositol-3-phosphate binding, phosphatidylinositol-4-phosphate binding, phosphatidylinositol-5-phosphate binding activity
CR_07680C_A	0.647987	0.0103945	CBR1	Putative cytochrome B5 reductase; plasma membrane-localized
C7_02360W_A	0.649031	0.0466854	OFD1	Putative prolyl hydroxylase family member; regulates Ume6p stability in response to oxygen; inhibited by hypoxia; repressed by prostaglandins; Spider biofilm induced
CR_05680C_A	0.64913	0.0303259		Secreted protein; exogenously expressed protein is a substrate for Kex2 processing in vitro; fluconazole-regulated; Spider biofilm induced
C3_07600W_A	0.651322	0.0360581	SEC23	Putative GTPase-activating protein; regulated upon yeast-hypha switch; Spider biofilm repressed
C1_13130C_A	0.651512	0.00854393	FRE3	Protein with similarity to ferric reductase Fre10p; possibly an essential gene, disruptants not obtained by UAU1 method
C4_04470W_A	0.652613	0.0487939	GAT1	GATA-type transcription factor; regulator of nitrogen utilization; required for nitrogen catabolite repression and utilization of isoleucine, tyrosine and tryptophan N sources; required for virulence in a mouse systemic infection model
C7_02350C_A	0.653559	0.0490208	PGA49	Putative GPI-anchored protein
C3_06670C_A	0.655246	0.0181851	NIF3	Protein of unknown function; ortholog of S. cerevisiae Nif3; rat catheter biofilm repressed
C1_03240W_A	0.656574	0.0305218		Protein of unknown function; Hap43-repressed gene
C6_00940C_A	0.657081	0.0350943		Ortholog(s) have nucleoside-triphosphatase activity, nucleoside-triphosphate diphosphatase activity and role in cellular response to phosphate starvation, nucleoside triphosphate metabolic process
CR_00860C_A	0.657157	0.0373328	HOS1	Histone deacetylase; similar to S. cerevisiae Hos1; has conserved deacetylation motif; slightly greater expression in white cells than in opaque cells
C3_05530W_A	0.657445	0.0162567	MED3	RNA polymerase II mediator complex subunit
C7_04230W_A	0.657687	0.0260477		Has domain(s) with predicted role in gamma-tubulin complex localization and gamma-tubulin ring complex localization
CR_04130C_A	0.658233	0.0371187	TRP5	Predicted tryptophan synthase; identified in detergent-resistant membrane fraction (possible lipid raft component); predicted N-terminal acetylation; Gcn4p-regulated; S. cerevisiae ortholog is Gcn4p regulated; upregulated in biofilm;
C3_02640C_A	0.659262	0.0381075	GDH3	NADP-glutamate dehydrogenase; Nrg1, Plc1 regulated; hypha, hypoxia, Efg1-repressed; Rim101-induced at pH 8; GlcNAc, ciclopirox, ketoconazole induced; exp and stationary phase protein; Spider biofilm repressed; rat catheter biofilm induced
C3_03170W_A	0.660014	0.0317379		Predicted membrane transporter, member of the drug:proton antiporter (14 spanner) (DHA2) family, MFS superfamily; induced by alpha pheromone in SpiderM medium
CR_07220C_A	0.660739	0.0200578		Ortholog(s) have double-stranded DNA binding activity, role in reciprocal meiotic recombination, synapsis and condensed nuclear chromosome localization
C3_02390W_A	0.662814	0.0307226	MPH1	Protein similar to S. cerevisiae Mph1p, which is a DNA helicase involved in DNA repair; induced under hydroxyurea treatment
C3_00530C_A	0.665146	0.035528	ERG26	C-3 sterol dehydrogenase, catalyzes the 2nd of 3 steps required to remove 2 C-4 methyl groups from an intermediate in ergosterol biosynthesis; amphotericin B, caspofungin repressed; Spider biofilm repressed
C3_07950C_A	0.665439	0.027539		Predicted oxidoreductase; rat catheter biofilm induced
C2_03940C_A	0.666938	0.0303749	PGA42	Putative GPI-anchored adhesin-like protein; decreased transcription is observed in azole-resistant strains that overexpress CDR1 and CDR2 or MDR1
CR_02030C_A	0.668003	0.0453828	AGO1	Putative Argonaute protein involved in RNA silencing; hyphal-induced expression; regulated by Cyr1, Ras1, Efg1, Nrg1, Tup1; rat catheter biofilm repressed
CR_00320C_A	0.668846	0.00845259		Ortholog of C. dubliniensis CD36 : Cd36_45850, C. parapsilosis CDC317 : CPAR2_500750, Pichia stipitis Pignal : PICST_43336, Candida tropicalis MYA-3404 : CTRG_04038 and Candida albicans WO-1 : CAWG_03191
C1_08750W_A	0.671467	0.0126252		Ortholog(s) have role in cellular response to oxidative stress, protein import into peroxisome matrix, protein quality control for misfolded or incompletely synthesized proteins and mitochondrial inner membrane localization
C3_03810W_A	0.67311	0.0251276	CEK1	ERK-family protein kinase; required for wild-type yeast-hypha switch, mating efficiency, virulence in mice; Cst20-Hst7-Cek1-Cph1 MAPK pathway regulates mating, and invasive hyphal growth under some conditions; Spider biofilm induced
C4_01890C_A	0.674715	0.0161308		Protein of unknown function; induced by alpha pheromone in SpiderM medium
C1_10960W_A	0.675499	0.0164541		Ortholog(s) have role in cellular response to DNA damage stimulus, proteasome assembly, ubiquitin-dependent protein catabolic process and cytoplasm, nucleus localization
C3_06120C_A	0.676383	0.0279964		Putative NADP-dependent oxidoreductase; Hap43-repressed; induced by benomyl treatment; oxidative stress-induced via Cap1; rat catheter biofilm repressed
C2_10100W_A	0.677602	0.0336602		Ortholog(s) have transcription coactivator activity and role in carbon catabolite regulation of transcription from RNA polymerase II promoter
C2_08790W_A	0.677813	0.0354613	GUT2	Glycerol-3-phosphate dehydrogenase; Plc1p-regulated; rat catheter biofilm induced; Spider biofilm induced
C1_05380C_A	0.678491	0.0473091	OYE32	NAD(P)H oxidoreductase family protein; induced by nitric oxide, amphotericin B, oxidative stress via Cap1; upregulation associated with MDR1 overexpression or benomyl treatment; macrophage-downregulated protein; Spider biofilm induced
C2_07310W_A	0.679584	0.0102391		Has domain(s) with predicted sequence-specific DNA binding activity
C4_06710W_A	0.68153	0.0144885	RPT5	26S proteasome regulatory subunit; transcript regulated by Nrg1 and Mig1; regulated by Gcn2 and Gcn4; protein level decreases in stationary phase
C3_07630C_A	0.682616	0.0485481	GST1	Putative glutathione S-transferase; upregulated in the presence of human neutrophils; expression is regulated upon white-opaque switching; increased transcription is observed upon benomyl treatment
C5_05400W_A	0.68327	0.00456688		PDR-subfamily ABC transporter (half-size); similar to WHITE subfamily proteins; repressed by fluphenazine treatment or in an azole-resistant strain that overexpresses CDR1 and CDR2; induced by nitric oxide; rat catheter biofilm induced
CR_09320C_A	0.686463	0.00653291		Protein of unknown function; rat catheter and Spider biofilm induced
CR_01420W_A	0.686946	0.0142924		Predicted pseudouridine synthase; Spider biofilm induced
C1_07860W_A	0.687059	0.0283123		Protein of unknown function; Spider biofilm induced
C1_03340C_A	0.688643	0.0244779		Protein with t-SNARE domains and a microtubule associated domain; Hap43-induced gene; repressed by alpha pheromone in SpiderM medium
C2_06150C_A	0.689507	0.0148818	TRP4	Predicted enzyme of amino acid biosynthesis; upregulated in biofilm; regulated by Gcn2p and Gcn4p; S. cerevisiae ortholog is Gcn4p regulated
C5_01900C_A	0.690017	0.0403176		Ortholog(s) have double-stranded DNA binding, kinetochore binding activity
C7_03910W_A	0.690559	0.0178393		Epsilon-COP subunit of the coatomer; regulates retrograde Golgi-to-ER protein traffic; Spider biofilm repressed
C4_02720C_A	0.691078	0.00489485	THR1	Putative homoserine kinase; regulated by Tup1; amphotericin B repressed; regulated by Gcn2 and Gcn4; Spider biofilm repressed
CR_06560C_A	0.691189	0.0276473	ERG11	Lanosterol 14-alpha-demethylase; cytochrome P450 family; role in ergosterol biosynthesis; target of azole antifungals; may contribute to drug resistance; azole or flow model biofilm induced; drug treated biofilm induced; hypoxia regulated
C1_03040W_A	0.69157	0.00966147	HMS1	hLh domain Myc-type transcript factor; required for morphogenesis induced by elevated temperature or Hsp90 compromise; acts downstream of Pcl1; Spider biofilm induced
C5_04420W_A	0.695063	0.00397426		Protein of unknown function; mutants are viable; Spider biofilm induced
C3_04790W_A	0.697113	0.0082442	URA4	Dihydroorotase; protein present in exponential and stationary growth phase yeast cultures
C2_09680W_A	0.698552	0.00942768		Ortholog of S. cerevisiae : OTU2, C. dubliniensis CD36 : Cd36_51210, C. parapsilosis CDC317 : CPAR2_303850, C. auris B8441 : B9J08_000423 and Candida tenuis NRRL Y-1498 : CANTEDRAFT_114159
C3_00690C_A	0.69914	0.00845259	VPS1	Dynamin-family GTPase-related protein; induced upon adherence to polystyrene; regulated by Gcn2p and Gcn4p
C2_07660W_A	0.700385	0.00761062	SGE1	Putative multidrug resistance factor; induced in low iron; regulated by Sef1, Sfu1, and Hap43
C1_09730W_A	0.701237	0.00775499		Ortholog(s) have mRNA 3'-UTR binding activity, role in regulation of mRNA stability, regulation of phosphate metabolic process and cytoplasm localization
C1_01440C_A	0.702693	0.0309855		Ortholog of S.pombe SPCC825.05c; a predicted splicing coactivator; transcription repressed in azole-resistant strain overexpressing CDR1 and CDR2; induced by benomyl treatment
C7_02460C_A	0.703816	0.0208249		Protein of unknown function; UPF0057 protein family member; localizes to the plasma membrane; Spider biofilm induced
C1_08100W_A	0.704023	0.0265944	GLR1	Glutathione reductase; upregulated by human neutrophils; oxidative stress-induced regulation via Cap1p; overexpression correlates with multidrug resistance in a cap1 mutant, farnesol induced; stationary phase enriched protein
C1_00540C_A	0.704738	0.0269706		Putative glutaredoxin; induced by nitric oxide; Spider biofilm induced
C2_03870W_A	0.705149	0.00908535	PIKALPHA	Phosphatidylinositol 4-kinase; controls levels of phosphatidylinositol-4-phosphate (PI(4)P) in the Golgi; non-sex gene located in MTLalpha mating-type-like locus; nonidentical gene encoding PI(4)P kinase, PIKA, located in MTLa locus
CR_05430W_A	0.707581	0.0146972	MTLALPHA2	Homeodomain protein of MTLalpha (Mating Type Like) locus; alpha2p, together with a1p, repress white-opaque switching and mating (an opaque-specific process); a/alpha mating type may increase virulence, provides competitive advantage
C1_05510C_A	0.707964	0.047936		Protein with a role in insertion of tail-anchored proteins into the ER membrane; required for efficient mating, in shmoo formation and nuclear migration in the pre-zygote of S. cerevisiae; Hap43-repressed
C1_08850C_A	0.709342	0.0320562		Protein of unknown function; involved in secretion of proteins that lack classical secretory signal sequences; Spider biofilm induced
C1_00020C_A	0.710403	0.0224661		Ortholog(s) have 2,5-diamino-6-ribitylamino-4(3H)-pyrimidinone 5'-phosphate deaminase activity, pseudouridine synthase activity and role in riboflavin biosynthetic process, tRNA pseudouridine synthesis
CR_06750C_A	0.712419	0.0082442	CDC24	GDP-GTP exchange factor for Cdc42p; phosphorylated; required for maintenance of hyphal growth; misexpression blocks hyphal growth and causes avirulence in a mouse model of systemic infection; antigenic during human oral infection
C5_01310W_A	0.712464	0.0139789	RPN8	Putative regulatory subunit of the 26S proteasome; mutation confers hypersensitivity to amphotericin B; regulated by Mig1, Gcn2 and Gcn4; Spider biofilm repressed
C7_03860W_A	0.712598	0.0321956		Protein with a role in insertion of tail-anchored proteins into the ER membrane; Spider biofilm repressed
C6_04590C_A	0.71318	0.0170375		20S proteasome subunit (beta7); protein present in exponential and stationary growth phase yeast cultures
C2_00700W_A	0.713723	0.00585331	PTH1	Putative gluconate transport protein; antigenic during human oral infection; possibly an essential gene, disruptants not obtained by UAU1 method
C7_03500W_A	0.715229	0.0352082	RET2	Delta subunit of the coatomer complex (COPI); coats Golgi-derived transport vesicles; involved in retrograde transport between Golgi and ER; interacts with Crk1 in the two-hybrid system; Spider biofilm repressed
C4_00490W_A	0.716533	0.0280116		Ortholog(s) have endonuclease activity, ubiquitin binding activity and role in mRNA cleavage, nuclear-transcribed mRNA catabolic process, no-go decay
CR_01540W_A	0.716941	0.00372367	ZCF22	Predicted Zn(II)2Cys6 transcription factor
C1_06880C_A	0.717817	0.0171156	ECM331	GPI-anchored protein; mainly at plasma membrane, also at cell wall; Hap43, caspofungin-induced; Plc1-regulated; Hog1, Rim101-repressed; colony morphology-related regulated by Ssn6; induced by ketoconazole and hypoxia
C2_01850W_A	0.718327	0.0134349	UTP13	Putative U3 snoRNA-associated protein; Hap43-induced; repressed in core stress response; physically interacts with TAP-tagged Nop1
C5_02460C_A	0.719824	0.0357714		Predicted ORF from Assembly 19; removed from Assembly 20; subsequently reinstated in Assembly 21 based on comparative genome analysis
C6_01400W_A	0.720333	0.04605		Putative mitochondrial membrane protein; ortholog of S. cerevisiae Sls1; coordinates expression of mitochondrially-encoded genes; Hap43-induced
C1_02760W_A	0.722649	0.00620969	MNN1	Putative alpha-1,3-mannosyltransferase; of the mannosyltransferase complex; negatively regulated by Rim101; transcript elevated in chk1 and nik1 mutants, but not in sln1 mutant; Spider and flow model biofilm induced
C5_02230W_A	0.725125	0.0126898		Ortholog of C. dubliniensis CD36 : Cd36_52590, C. parapsilosis CDC317 : CPAR2_100565, Debaryomyces hansenii CBS767 : DEHA2G06908g and Candida guilliermondii ATCC 6260 : PGUG_02858
CR_05250C_A	0.725509	0.0248163		Ortholog of C. dubliniensis CD36 : Cd36_52800, C. parapsilosis CDC317 : CPAR2_303110, C. auris B8441 : B9J08_002492 and Candida tenuis NRRL Y-1498 : CANTEDRAFT_92321
C4_07090C_A	0.726883	0.0214481	PGA58	Putative GPI-anchored protein; transcription is positively regulated by Tbf1p
C2_02720W_A	0.726962	0.0101968	RPS5	Ribosomal protein S5; macrophage/pseudohyphal-induced after 16 h; downregulated upon phagocytosis by murine macrophage; Hap43-induced; Spider biofilm repressed
C2_05520W_A	0.727205	0.0161309		Has domain(s) with predicted RNA 7-methylguanosine cap binding, mRNA binding activity
C2_07120W_A	0.728614	0.00554934	BUB3	Protein similar to S. cerevisiae Bub3; a kinetochore checkpoint component; induced by hydroxyurea treatment; flow model biofilm induced; Spider biofilm induced
C1_00530C_A	0.729725	0.00891532	RMS1	Putative lysine methyltransferase; Hap43-induced; protein induced during mating; possibly essential, disruptants not obtained by UAU1 method; rat catheter and Spider biofilm induced
C1_01170C_A	0.730246	0.0115373	CAM1-1	Putative translation elongation factor; downregulated upon phagocytosis by murine macrophages; Hap43-induced gene; Spider biofilm repressed
C1_10610W_A	0.730473	0.0300855	PCL1	Cyclin homolog; transcript induced by filamentous growth; induced by alpha pheromone in SpiderM medium
C7_00240W_A	0.730755	0.0498659	QCR2	Ubiquinol-cytochrome-c reductase; antigenic; induced by interaction with macrophage; repressed by nitric oxide; in detergent-resistant membrane fraction (possible lipid raft component); levels decrease in stationary phase; Hap43p-repressed
CR_02940C_A	0.732105	0.032115	FUR1	Uracil phosphoribosyltransferase; predicted tetrameric enzyme of pyrimidine salvage; mutations associated with flucytosine resistance in clade I clinical isolates; flucytosine, macrophage-induced protein; levels decrease in stationary phase
C1_00860W_A	0.732854	0.0125105		Stationary phase enriched protein; predicted ORF from Assembly 19; removed from Assembly 20; subsequently reinstated in Assembly 21 based on comparative genome analysis
C4_06190C_A	0.734637	0.00452065		Has domain(s) with predicted metal ion binding activity
C5_03710C_A	0.735725	0.0302609	FGR27	Zn(II)2Cys6 transcription factor; transposon mutation affects filamentous growth; required for yeast cell adherence to silicone substrate; Spider biofilm induced
C1_03460C_A	0.737841	0.0142924		Protein of unknown function; flow model biofilm induced; Spider biofilm induced
CR_00990W_A	0.738461	0.00541027		Protein of unknown function; induced by alpha pheromone in SpiderM medium; Spider biofilm induced
C2_02710C_A	0.738863	0.00943054		Ortholog of C. dubliniensis CD36 : Cd36_53470, Candida tenuis NRRL Y-1498 : CANTEDRAFT_93324, Candida tropicalis NEW ASSEMBLY : CTRG1_05538 and Spathaspora passalidarum NRRL Y-27907 : SPAPADRAFT_55715
CR_10290C_A	0.740012	0.0117609		Ortholog(s) have chromatin binding, molecular adaptor activity and role in RNA polymerase II preinitiation complex assembly, chromatin organization, histone acetylation, transcription by RNA polymerase II
CR_04730W_A	0.743049	0.0152456		Protein with Mob2p-dependent hyphal regulation; fluconazole-induced
C3_02430W_A	0.743168	0.0102391		Putative multidrug resistance protein; upregulated by Efg1p
CR_05880W_A	0.743684	0.0178976		Putative plasma membrane protein; in S. cerevisiae it is localized to the cell bud and mating projection membrane; repressed by alpha pheromone in SpiderM medium
C3_02630C_A	0.747299	0.0404983		Ortholog(s) have role in mitochondrial fusion and integral component of mitochondrial outer membrane localization
C4_04270W_A	0.747305	0.0260218	MRV8	Protein of unknown function; Spider biofilm induced
C6_00770C_A	0.748638	0.00911521		Has domain(s) with predicted RNA binding, ribonuclease T2 activity
CR_04570C_A	0.749026	0.00652741	RNY11	Ortholog(s) have endoribonuclease activity, role in RNA catabolic process, apoptotic process, cell morphogenesis and cytosol, extracellular region, fungal-type vacuole, vacuole localization
C7_00560C_A	0.7521	0.0160191		Ortholog(s) have role in cellular response to heat, cellular response to oxidative stress, chronological cell aging, negative regulation of autophagy of mitochondrion
C3_05560W_A	0.754337	0.00466227		Has domain(s) with predicted nucleic acid binding, nucleotide binding activity
C2_09520C_A	0.755992	0.00878339	GDE1	Glycerophosphocholine phosphodiesterase; mutation confers hypersensitivity to 5-fluorouracil (5-FU); F-12/CO2 early biofilm induced
C3_07770C_A	0.757236	0.00756116	TIP1	Protein with a predicted role in biogenesis of ER-derived COPII transport vesicles; mutation confers hypersensitivity to toxic ergosterol analog
C4_02770C_A	0.757347	0.004108	CRH12	CRH family cell wall protein; transcript regulated by Nrg1 and Tup1; alkaline induced by Rim101; repressed during cell wall regeneration; flow model biofilm induced
C4_02920W_A	0.758919	0.0185054		Maltase; induced during growth on sucrose; induced by alpha pheromone in SpiderM medium; early-stage flow model biofilm indced
CR_07590W_A	0.759029	0.0126252	HIS1	ATP phosphoribosyl transferase; enzyme of histidine biosynthesis; acid upregulated/alkaline repressed by Rim101; regulated by Gcn2, Gcn4; strain CA9 is a his1 mutant; flow model biofilm induced; Spider biofilm repressed
C5_04510W_A	0.760203	0.00276273		Ortholog(s) have unfolded protein binding activity, role in ribosomal large subunit assembly, ribosomal large subunit biogenesis and cytosol localization
C4_04450C_A	0.761236	0.0319314	PGA4	GPI-anchored cell surface protein; beta-1,3-glucanosyltransferase with similarity to the A. fumigatus GEL family; transcript induced in RHE model of oral candidiasis; fluconazol-induced
C4_05060W_A	0.76325	0.00698603	APM1	Ortholog of S. cerevisiae/S. pombe Apm1; a clathrin-associated protein complex (AP-1) subunit; phosphorylated protein; Tn mutation affects filamentous growth; Spider biofilm repressed
CR_03680C_A	0.764267	0.0139881	MUM2	Protein similar to S. cerevisiae Mum2, a protein essential for meiotic DNA replication and sporulation; induced by alpha pheromone in SpiderM medium; transcript regulated by Tup1
C1_05360C_A	0.764392	0.0300855	VID27	Protein similar to S. cerevisiae Vid27p; transposon mutation affects filamentous growth; mutation confers hypersensitivity to toxic ergosterol analog; fungal-specific (no human or murine homolog)
C2_03000C_A	0.764817	0.0257946		Ortholog of S. cerevisiae Rtt106; histone chaperone that regulates chromatin structure in transcribed and silenced chromosomal regions; affects transcriptional elongation; Hap43-repressed; Spider biofilm repressed
CR_04420C_A	0.766289	0.0334318		Has domain(s) with predicted catalytic activity and membrane localization
CR_10030W_A	0.766978	0.0152456		Predicted mitochondrial intermembrane space protein of unknown function; possibly an essential gene, disruptants not obtained by UAU1 method
C5_04660C_A	0.767727	0.00761062		Protein of unknown function; Spider biofilm induced
C5_02630C_A	0.768104	0.00857735		Ortholog(s) have serine-tRNA ligase activity, role in mitochondrial seryl-tRNA aminoacylation, spore germination and mitochondrion localization
C2_07560W_A	0.769307	0.0276473		Phosphorylated protein of unknown function; transcript is upregulated clinical isolates from HIV positive patients with oral candidiasis
C1_13580W_A	0.769898	0.0349029	FET34	Multicopper ferroxidase; induced by low iron, ciclopirox olamine, ketoconazole, hypoxia; alkaline induced by Rim101; repressed in fluconazole-resistant isolate; Sfu1, Hog1 repressed; complements S. cerevisiae fet3; Spider biofilm induced
C3_02820C_A	0.77221	0.0160191	FET31	Putative multicopper oxidase; ketoconazole/caspofungin/amphotericin B repressed; Sef1/Sfu1/Hap43 regulated; reports differ if functional homolog of ScFet3; rat catheter and Spider biofilm induced
C5_02430W_A	0.773456	0.00961845		Ortholog(s) have NEDD8 activating enzyme activity and role in protein neddylation
C6_01680C_A	0.77674	0.0416955		Ortholog of C. dubliniensis CD36 : Cd36_60540, C. parapsilosis CDC317 : CPAR2_602830, Candida tenuis NRRL Y-1498 : CANTEDRAFT_108530 and Debaryomyces hansenii CBS767 : DEHA2F15532g
C7_03390C_A	0.778459	0.00503535		Ortholog(s) have Arp2/3 complex binding activity, role in actin cortical patch assembly, actin filament debranching, negative regulation of Arp2/3 complex-mediated actin nucleation and actin cortical patch, cytoplasm localization
C5_04940W_A	0.781665	0.0352082		Ortholog of C. dubliniensis CD36 : Cd36_60590, C. parapsilosis CDC317 : CPAR2_602880, C. auris B8441 : B9J08_001867 and Candida tenuis NRRL Y-1498 : CANTEDRAFT_115034
C1_09910C_A	0.782293	0.00658879		Ortholog(s) have crossover junction endodeoxyribonuclease activity, endodeoxyribonuclease activity
C4_03770W_A	0.78233	0.042932	CAN3	Predicted amino acid transmembrane transporter; transcript regulated by white-opaque switch; Hap43-repressed gene
CR_02060W_A	0.782878	0.00273245	PEX7	Ortholog(s) have peroxisome matrix targeting signal-2 binding activity, role in fatty acid metabolic process, protein import into peroxisome matrix, docking, protein targeting to peroxisome and cytosol, peroxisome localization
C4_06360C_A	0.785515	0.0347656		Putative mitochondrial intermembrane space protein; colony morphology-related gene regulation by Ssn6; regulated by Sef1, Sfu1, and Hap43; Spider biofilm repressed; rat catheter biofilm induced
CR_10480W_A	0.785797	0.0463377		Ortholog of S. cerevisiae : PRM5, C. dubliniensis CD36 : Cd36_60980, C. parapsilosis CDC317 : CPAR2_603060, C. auris B8441 : B9J08_003420 and Candida tenuis NRRL Y-1498 : CANTEDRAFT_113703
C1_13170C_A	0.787538	0.00553625	CAN1	Basic amino acid permease; complements lysine transport mutation; 10 predicted transmembrane regions, 3 predicted N-glycosylation sites; phagocytosis by macrophages induces transcript; rat catheter, Spider and flow model biofilm induced
CR_07940W_A	0.790146	0.0201485	HAL21	Putative phosphoadenosine-5'-phosphate or 3'-phosphoadenosine 5'-phosphosulfate phosphatase; possible role in sulfur recycling; ortholog of S. cerevisiae Met22; predicted Kex2 substrate; F-12/CO2 biofilm induced
C3_03070W_A	0.790985	0.0158976		Alpha/beta hydrolase and lipase domain protein; Hap43-repressed; Spider and flow model biofilm induced
CR_08020C_A	0.791198	0.041685		Ortholog(s) have translation regulator activity and role in regulation of translation
CR_00010C_A	0.792209	0.0424827		Protein of unknown function; induced by alpha pheromone in SpiderM medium
C5_04480C_A	0.792891	0.0431614		Probable mitochondrial tyrosyl-tRNA synthetase, based on conservation in other fungi
CR_02420W_A	0.793234	0.039073		Ortholog of C. dubliniensis CD36 : Cd36_61190, C. parapsilosis CDC317 : CPAR2_603230, C. auris B8441 : B9J08_001119 and Candida tenuis NRRL Y-1498 : cten_CGOB_00054
C4_05350W_A	0.795699	0.00554789	SEC9	t-SNARE protein required for secretory vesicle-membrane fusion
C1_05200C_A	0.796037	0.0472272	EBP1	NADPH oxidoreductase; interacts with phenolic substrates (17beta-estradiol); possible role in estrogen response; induced by oxidative, weak acid stress, NO, benomyl, GlcNAc; Cap1, Mnl1 induced; Hap43-repressed; rat catheter biofilm induced
C1_05400C_A	0.797904	0.0244844		Ortholog(s) have role in histone deacetylation, negative regulation of chromatin silencing at telomere, negative regulation of meiotic nuclear division and positive regulation of stress-activated MAPK cascade, more
C2_05030C_A	0.798272	0.0468586	FIG1	S. cerevisiae Fig1 ortholog; an integral membrane protein required for mating; role in thigmotropism; transcript is opaque-specific and a-specific; activated by Cph1 or alpha pheromone
CR_00390W_A	0.798526	0.0479369		Putative mitochondrial phosphatidylglycerophosphatase (PGP phosphatase); essential for cardiolipin biosynthesis; rat catheter biofilm induced
C2_09930W_A	0.798708	0.0279964	HOC1	Protein with similarity to mannosyltransferases; similar to S. cerevisiae Hoc1p and C. albicans Och1p
C3_06250W_A	0.803992	0.00514129		Predicted membrane transporter, member of the drug:proton antiporter (14 spanner) (DHA2) family, major facilitator superfamily (MFS); Hap43p-repressed gene
C3_04300C_A	0.805214	0.00364867		Ortholog(s) have chaperone binding activity, role in protein folding in endoplasmic reticulum, response to unfolded protein, ubiquitin-dependent ERAD pathway and endoplasmic reticulum lumen localization
C4_06840W_A	0.805525	0.00750811		Has domain(s) with predicted hydrolase activity, acting on carbon-nitrogen (but not peptide) bonds, in linear amidines, metal ion binding activity
C4_01240C_A	0.807372	0.0166364		Protein of unknown function; transcription repressed by fluphenazine treatment
C4_03490C_A	0.807503	0.045898	FPG1	Formamidopyrimidine DNA glycosylase, involved in repair of gamma-irradiated DNA; Hap43p-repressed gene
C1_12050W_A	0.807505	0.00624636	CTA1	Protein similar to S. cerevisiae Mos10p, which affects S. cerevisiae filamentous growth; activates transcription in 1-hybrid assay in S. cerevisiae; protein levels increase under weak acid stress; nonessential
C2_03370W_A	0.807943	0.00619791	COQ3	Protein with a predicted role in coenzyme Q biosynthesis; transcriptionally induced by interaction with macrophages; possibly an essential gene, disruptants not obtained by UAU1 method
C3_04330C_A	0.809656	0.0128695		Ortholog(s) have histone binding activity, role in chromatin remodeling, histone exchange and Swr1 complex localization
C1_08660C_A	0.811071	0.0041178		Predicted membrane protein; induced by alpha pheromone in SpiderM medium
C3_02810C_A	0.811075	0.0165445	ADK1	Putative adenylate kinase; repressed in hyphae; macrophage-induced protein; adenylate kinase release used as marker for cell lysis; possibly essential (UAU1 method); flow model biofilm induced; rat catheter and Spider biofilm repressed
C3_05000W_A	0.814122	0.013154	CHC1	Clathrin heavy chain; subunit of the major coat protein; role in intracellular protein transport and endocytosis; flow model and rat catheter biofilm repressed
C4_05980C_A	0.814388	0.0418914		Ortholog(s) have role in late endosome to vacuole transport via multivesicular body sorting pathway and Vps55/Vps68 complex, fungal-type vacuole membrane localization
C6_00130C_A	0.814577	0.0206728		Protein of unknown function; oxidative stress-induced via Cap1; induced by alpha pheromone in SpiderM medium
C1_06130C_A	0.815078	0.0328531	RPL10A	Predicted ribosomal protein; downregulated upon phagocytosis by murine macrophages; Hap43-induced; Spider biofilm repressed
C3_03520C_A	0.81546	0.0147155		Similar to alcohol dehydrogenases; induced by benomyl treatment, nitric oxide; induced in core stress response; oxidative stress-induced via Cap1; Spider biofilm repressed
C2_00790C_A	0.815705	0.0451736		Protein with a predicted role in 5.8S rRNA processing; flow model biofilm induced
C6_03860C_A	0.817713	0.0486897		Ortholog(s) have methionine-R-sulfoxide reductase activity and role in cellular response to oxidative stress
C3_00310C_A	0.818975	0.0155481		Ortholog(s) have phosphatidylinositol-3,5-bisphosphate 5-phosphatase activity, role in phosphatidylinositol dephosphorylation and PAS complex, extrinsic component of membrane, fungal-type vacuole membrane, nuclear periphery localization
CR_06230W_A	0.821266	0.027227	PGA60	Putative GPI-anchored adhesin-like protein; hyphal-induced expression
C2_03670W_A	0.823167	0.0253002	ADO1	Adenosine kinase; heterozygous null mutant is resistant to cordycepin in C. albicans fitness test; ketoconazole-induced; protein level decrease in stationary phase cultures; sumoylation target; Spider biofilm repressed
C3_01760W_A	0.829657	0.00237278	SHE3	mRNA-binding protein that localizes specific mRNAs to daughter yeast cells and to hyphal tips; required for normal filamentation and host epithelial cell damage; ortholog of S. cerevisiae She3 but target mRNAs differs
C2_02570W_A	0.83198	0.0425888		Ortholog(s) have extracellular region localization
C6_00880W_A	0.83294	0.0108591		Ortholog of C. dubliniensis CD36 : Cd36_63840, C. parapsilosis CDC317 : CPAR2_601510, Debaryomyces hansenii CBS767 : DEHA2A06270g and Pichia stipitis Pignal : PICST_31363
C3_02530W_A	0.83331	0.0162053	AYR2	Putative NADPH-dependent 1-acyl dihydroxyacetone phosphate reductase; shows colony morphology-related gene regulation by Ssn6p
C4_02820W_A	0.839686	0.0386524		Ortholog(s) have methylated histone binding, transcription factor binding activity
C5_02030W_A	0.842722	0.0058823		Protein of unknown function; induced by alpha pheromone in SpiderM medium; Spider biofilm induced
CR_02780W_A	0.84296	0.0291663	GLC3	Putative 1,4-glucan branching enzyme; fluconazole-induced; colony morphology-related gene regulation by Ssn6; stationary phase enriched protein
C7_02790C_A	0.844023	0.00796237		Mitochondrial dicarboxylate transporter; possibly an essential gene, disruptants not obtained by UAU1 method
C1_10790W_A	0.844039	0.00905016	SAP4	Secreted aspartyl proteinase; sap4,5,6 mutant defective in protein utilization for nitrogen; virulence role complicated by URA3 effects; expressed during mucosal and systemic infections; N-glycosylated; rat catheter, Spider biofilm induced
C1_05090W_A	0.846022	0.0088831	FGR17	Putative DNA-binding transcription factor; has zinc cluster DNA-binding motif; lacks an ortholog in S. cerevisiae; transposon mutation affects filamentous growth; Hap43p-repressed gene
CR_10230W_A	0.846425	0.00554934	PAD1	Putative phenylacrylic acid decarboxylase; repressed by Rgt1p
C2_05060C_A	0.848932	0.00943054	ALS1	Cell-surface adhesin; adhesion, virulence, immunoprotective roles; band at hyphal base; Rfg1, Ssk1, Spider biofilm induced; flow model biofilm repressed; CAI-4 strain background effects; promoter bound Bcr1, Tec1, Efg1, Ndt80, and Brg1
CR_08330W_A	0.851557	0.0120872	SHM2	Cytoplasmic serine hydroxymethyltransferase; complements glycine auxotrophy of S. cerevisiae shm1 shm2 gly1-1 mutant; antigenic; farnesol-upregulated in biofilm; stationary-phase enriched protein; rat catheter and Spider biofilm repressed
C3_04450C_A	0.851945	0.00398622		Putative membrane protein with a predicted role in zinc ion homeostasis; Hap43-induced; fluconazole-induced; rat catheter and Spider biofilm induced
CR_03140C_A	0.852046	0.00296774		Ortholog(s) have FAD diphosphatase activity and role in flavin-containing compound metabolic process
C6_03100W_A	0.852347	0.00857911	PGA61	Putative GPI-anchored protein
C6_03310W_A	0.852766	0.0286666		Ortholog(s) have role in chromatin remodeling, histone exchange and Swr1 complex, cytosol, nucleus localization
C1_01630W_A	0.856014	0.0441624	ALG2	Putative mannosyltransferase involved in cell wall mannan biosynthesis; transcription is elevated in chk1, nik1, and sln1 homozygous null mutants
C1_10250C_A	0.8627	0.0282768		Ortholog of C. dubliniensis CD36 : Cd36_64550, Candida tropicalis NEW ASSEMBLY : CTRG1_02747, Candida tropicalis MYA-3404 : CTRG_02747 and Candida albicans WO-1 : CAWG_04972
C2_02130C_A	0.862808	0.0276067		Ortholog(s) have metalloaminopeptidase activity and role in protein initiator methionine removal involved in protein maturation
C1_09210C_A	0.863737	0.0115919		Pseudogene; added to Assembly 21 based on comparative genome analysis
CR_04540C_A	0.86941	0.0108208	HBR2	Putative alanine glyoxylate aminotransferase; regulated by Gcn4p and hemoglobin; stationary phase enriched protein
C1_14420W_A	0.870219	0.00554789		Ortholog of C. dubliniensis CD36 : Cd36_64900, C. parapsilosis CDC317 : CPAR2_600390, Pichia stipitis Pignal : PICST_30726 and Candida guilliermondii ATCC 6260 : PGUG_04023
C3_03530W_A	0.874354	0.0128835		Putative protein of unknown function; macrophage-induced gene
C2_04390W_A	0.874926	0.0241821		Ortholog of C. dubliniensis CD36 : Cd36_64660, C. parapsilosis CDC317 : CPAR2_601110, Candida tenuis NRRL Y-1498 : CANTEDRAFT_119969 and Debaryomyces hansenii CBS767 : DEHA2A05896g
C3_00290W_A	0.874982	0.00409372	GLE2	Putative nuclear pore complex; possibly an essential gene, disruptants not obtained by UAU1 method; rat catheter biofilm repressed
C1_09970C_A	0.875486	0.0196397		Protein of unknown function; GlcNAc-induced protein; Spider biofilm induced; rat catheter biofilm repressed
C3_04130W_A	0.875508	0.0372729		Ortholog of S. cerevisiae Spo71; a meiosis-specific protein required for spore wall formation during sporulation in S. cerevisiae; possibly an essential gene, disruptants not obtained by UAU1 method
C2_06570C_A	0.875855	0.049712		Has domain(s) with predicted GTP binding activity
C4_00850C_A	0.877645	0.00845259		Ortholog of C. dubliniensis CD36 : Cd36_65220, C. parapsilosis CDC317 : CPAR2_213740, C. auris B8441 : B9J08_003161 and Candida tenuis NRRL Y-1498 : CANTEDRAFT_92162
CR_09940W_A	0.878155	0.0106055	NAG1	Glucosamine-6-phosphate deaminase; required for normal hyphal growth and mouse virulence; converts glucosamine 6-P to fructose 6-P; reversible reaction in vitro; gene and protein is GlcNAc-induced; Spider biofilm induced
C5_01560C_A	0.879704	0.00276273	DAC1	N-acetylglucosamine-6-phosphate (GlcNAcP) deacetylase; N-acetylglucosamine utilization; required for wild-type hyphal growth and virulence in mouse systemic infection; gene and protein are GlcNAc-induced; Spider biofilm induced
CR_04500C_A	0.881567	0.0408292		Has domain(s) with predicted peptidase activity and role in proteolysis
C1_11940C_A	0.882641	0.0370659		Ortholog(s) have adenylate kinase activity, nucleoside triphosphate adenylate kinase activity, role in nucleotide metabolic process and mitochondrial inner membrane, mitochondrial matrix localization
C1_13300C_A	0.88326	0.00562443	VPS70	Has domain(s) with predicted peptidase activity and role in proteolysis
C2_06270W_A	0.8879	0.0155164		Predicted exonuclease; Spider biofilm induced
C1_13940W_A	0.888617	0.0445143		Has domain(s) with predicted exonuclease activity and intracellular localization
C3_07820W_A	0.888878	0.0102165		Putative protein of unknown function; Hap43-repressed; repressed by nitric oxide; Spider biofilm induced
C1_11270W_A	0.889579	0.0311729		Putative cytoplasmic RNA-binding protein; heterozygous null mutant exhibits hypersensitivity to parnafungin and cordycepin in C. albicans fitness test; Spider biofilm repressed
CR_09170C_A	0.890903	0.004108		Putative NAD dependent epimerase/dehydratase family protein; Spider biofilm repressed
C5_03310C_A	0.892454	0.013289		Ortholog(s) have nuclear import signal receptor activity, role in protein import into nucleus and cytoplasm, nucleus localization
C4_02630C_A	0.892957	0.0108208		S-adenosylmethionine transporter of the mitochondrial inner membrane; mitochondrial carrier family; predicted role in biotin biosynthesis and respiratory growth; Spider biofilm repressed
CR_09100C_A	0.895773	0.00514129		Ortholog(s) have RNA polymerase II transcription regulator recruiting activity, methylated histone binding activity
C3_02710W_A	0.896274	0.0028002	PSF3	Putative GINS complex subunit; cell-cycle regulated periodic mRNA expression; Spider biofilm induced
C2_09630C_A	0.896916	0.00940243	THG1	tRNA guanylyltransferase, with role in tRNA modification; catalyzes reverse (3'-5') nucleotide polymerization
C1_06930W_A	0.899389	0.0308735		Ortholog(s) have ATPase activity
C4_00630C_A	0.900123	0.016253		Ortholog(s) have endoribonuclease activity, role in nuclear mRNA surveillance of mRNP export, transcription elongation from RNA polymerase II promoter and cytoplasm, nucleus localization
C4_06110C_A	0.901881	0.0142808	SSR1	Beta-glucan associated ser/thr rich cell-wall protein with a role in cell wall structure; GPI anchor; highly mutable due to internal Ser-Ala tandem repeats; detected at germ tube plasma membrane; repressed in cells treated with Congo Red;
C5_01210W_A	0.905102	0.00143143		Ortholog of S. cerevisiae Ioc4, a protein that influences gene expression through chromatin remodeling; oxidative stress-induced via Cap1
C3_07270C_A	0.90811	0.0102165	YOX1	Putative homeodomain-containing transcription factor; transcriptional repressor; periodic mRNA expression, peak at cell-cycle G1/S phase
C4_03040W_A	0.908811	0.00979056	RPP0	Putative ribosomal protein; antigenic in mouse; repressed upon phagocytosis by murine macrophage; induced by Tbf1; overlaps orf19.7014; Spider biofilm repressed
C2_02120W_A	0.909034	0.0179639		Putative oxidoreductase; mutation confers hypersensitivity to toxic ergosterol analog; rat catheter and Spider biofilm induced
CR_10770W_A	0.9093	0.00878339		Ortholog(s) have RNA 7-methylguanosine cap binding, exoribonuclease activator activity, hydrolase activity, acting on acid anhydrides, in phosphorus-containing anhydrides, m7G(5')pppN diphosphatase activity
CR_04820W_A	0.909534	0.0291663		Dihydrofolate synthetase involved in folic acid biosynthesis
C3_05730C_A	0.910351	0.0220649	GIR2	Ortholog of S. cerevisiae Gir2; transposon mutation affects filamentous growth
CR_07890W_A	0.912221	0.0220793		Ortholog(s) have zinc ion binding activity, role in protein import into mitochondrial intermembrane space and mitochondrial intermembrane space localization
CR_01340W_A	0.914948	0.0157948		Putative mitochondrial outer membrane protein; regulated by Sef1p-, Sfu1p-, and Hap43p
C7_02130W_A	0.915076	0.0371187	VMA11	Predicted ortholog of S. cerevisiae Tfp3/Vma11; c' subunit of the V0 subcomplex of the vacuolar ATPase; required for hemoglobin-iron utilization; Spider biofilm repressed
C6_04230W_A	0.917252	0.0118887		Ortholog(s) have role in chromosome segregation and kinetochore, nuclear MIS12/MIND complex, spindle pole localization
C1_07480C_A	0.918223	0.0153955	CRN1	Coronin; cortical actin cytoskeletal component; predicted role in regulation of actin patch assembly; rat catheter and Spider biofilm repressed
C2_01670C_A	0.918747	0.0271852	MSK1	Putative mitochondrial lysine-tRNA synthetase; flucytosine repressed
C1_03660W_A	0.919099	0.00908535	TOM40	Protein involved in mitochondrial protein import; Spider biofilm repressed
C2_02750C_A	0.919302	0.0233409		Predicted aldehyde dehydrogenase [NAD(P)+]; Spider biofilm induced
CR_00210W_A	0.920246	0.0160191	GRX1	Putative glutaredoxin; induced in low iron
C2_05510C_A	0.923947	0.00332085		Ortholog(s) have glutathione disulfide oxidoreductase activity and cytosol localization
C6_03500C_A	0.925363	0.0164068		Putative curved DNA-binding protein orthologous to S. pombe Cdb4; stationary phase enriched protein; rat catheter and Spider biofilm repressed
C1_03210C_A	0.926891	0.00296781		Ortholog(s) have role in histone deacetylation, negative regulation of antisense RNA transcription and positive regulation of transcription by RNA polymerase II, more
C2_01450C_A	0.9328	0.0371187		Short-chain dehydrogenase/reductase; upregulation correlates with clinical development of fluconazole resistance
C2_00380C_A	0.933056	0.00350171		Ortholog(s) have role in nucleocytoplasmic transport, protein import into nucleus and cytoplasm, nucleus localization
C2_05660W_A	0.937176	0.0187445		Predicted protein serine/threonine kinase and/or protein tyrosine kinase; Spider biofilm induced
CR_06870C_A	0.938134	0.0269116		Protein of unknown function; induced by nitric oxide independent of Yhb1p; regulated by Sef1, Sfu1, and Hap43; rat catheter biofilm induced
C5_03490C_A	0.942339	0.016253		Putative protein with a predicted role in exocytic transport from the Golgi; filament induced
C2_00960C_A	0.942558	0.0092378		Protein of unknown function; flow model biofilm induced
C4_06870W_A	0.94508	0.00409372	AHP2	Putative thiol-specific peroxiredoxin; macrophage-downregulated gene
CR_10300W_A	0.947147	0.0070535		Putative ortholog of S. cerevisiae Npa3p; possibly essential for growth (however, depletion mutant is viable)
CR_10790W_A	0.949925	0.0109027	POL3	Large subunit of DNA polymerase III; partially complements defects of an S. cerevisiae cdc2 mutant; differing reports about periodic (G1/S) or non-periodic mRNA expression through cell cycle; Hap43p-repressed
CR_03980W_A	0.950366	0.0171306	PRX1	Thioredoxin peroxidase; transcriptionally induced by interaction with macrophage; fluconazole induced; Fkh2p-downregulated; caspofungin repressed; protein present in exponential and stationary growth phase yeast cultures
C5_05450C_A	0.952548	0.00650877	LIP5	Cold-activated secreted lipase, differentially expressed lipase gene family member with possible roles in nutrition and acidic microenvironment; LIP5 and LIP8 expressed at all stages of mucosal and systemic infection; affects filamentation
C3_01520C_A	0.954284	0.0145215	LIP9	Secreted lipase, member of a lipase gene family whose members are expressed differentially in response to carbon source and during infection; may have a role in nutrition and/or in creating an acidic microenvironment
C1_04900W_A	0.954487	0.0318217	PMT1	Protein mannosyltransferase; required for virulence in mice and for adhesion to epithelial cells; role in hyphal growth and drug sensitivity; Als1, Sec20, Kre9, Pir1 are substrates; 1 of 5 PMT family members
C5_01420W_A	0.955659	0.00729213	DBF4	Regulatory subunit of Cdc7p-Dbf4p protein kinase complex that acts as negative regulator of hyphal development; cell-cycle regulated periodic mRNA expression; S. cerevisiae ortholog is not cell-cycle regulated
C7_04020C_A	0.957374	0.00344796		Ortholog of S. cerevisiae : YNR029C, C. glabrata CBS138 : CAGL0M10747g, C. dubliniensis CD36 : Cd36_72620, C. parapsilosis CDC317 : CPAR2_704190 and C. auris B8441 : B9J08_000738
C5_01300C_A	0.959768	0.00296781	ECM39	Putative mannosyltransferase similar to S. cerevisiae Ecm39p, which has a role in Calcofluor white resistance; predicted Kex2p substrate; has HKEXRF motif
CR_09380W_A	0.961293	0.0042283	PGA28	Protein similar to S. cerevisiae Wsc2p, which has roles in stress- and cell-wall-related processes; predicted Kex2p substrate; putative GPI-anchored adhesin-like protein
C3_02010C_A	0.961386	0.00858596		Ortholog of Candida albicans WO-1 : CAWG_05647
CR_01610C_A	0.961882	0.00391804	PDI1	Putative protein disulfide-isomerase; antigenic in human infection; soluble protein in hyphae; induced by filamentous growth; protein present in exponential and stationary growth phase yeast cultures; flow model biofilm repressed
C3_07130W_A	0.961927	0.0269869		Protein of unknown function; induced by ketoconazole; Spider, F-12/CO2 and flow model biofilm induced
C1_09840C_A	0.966744	0.0361643	LIP8	Secreted lipase, member of a differentially expressed lipase gene family with possible roles in nutrition and/or in creating an acidic microenvironment; LIP5 and LIP8 are expressed at all stages of both mucosal and systemic infection
C6_02480W_A	0.967317	0.027178	SHM1	Mitochondrial serine hydroxymethyltransferase; complements the glycine auxotrophy of an S. cerevisiae shm1 null shm2 null gly1-1 triple mutant; protein present in exponential and stationary growth phase yeast cultures
C7_02950C_A	0.967974	0.00344796	PRR2	Putative serine/threonine protein kinase; mutation confers resistance to 5-fluorocytosine (5-FC)
C2_06100W_A	0.969177	0.013289		Putative aldose reductase; protein level decreases in stationary phase cultures; Spider biofilm repressed
C1_09430W_A	0.969227	0.0355545	PUP3	Putative beta 3 subunit of the 20S proteasome; macrophage/pseudohyphal-repressed
C3_00330W_A	0.969838	0.0236781	SNG4	Putative membrane transporter; Hap43-induced; inducd by Mnl1p under weak acid stress; shows Mob2-dependent hyphal regulation
C2_07400C_A	0.970043	0.0327813		Predicted vacuolar protein with a calcineurin-like phosphoesterase domain; repressed by alpha pheromone in SpiderM medium
C4_06140C_A	0.971765	0.0304978		Protein of unknown function; rat catheter biofilm repressed
C1_12670C_A	0.972909	0.0463377		Ortholog(s) have histidinol-phosphatase activity and role in histidine biosynthetic process
C5_05340W_A	0.973776	0.00863816		CCR4-NOT complex component; involved in controlling mRNA initiation, elongation and degradation; rat catheter biofilm induced
C2_04560W_A	0.975533	0.0101968		Putative vacuolar protease; upregulated in the presence of human neutrophils; Spider biofilm induced
C4_00810C_A	0.976595	0.0445624	RAD6	Functional ortholog of S. cerevisiae Rad6; negative regulator of hyphal growth; required for wild-type UV resistance; acts in pathway with Efg1; ; transcript is UV-induced, slightly repressed during hyphal growth; gene has two introns
C2_00920W_A	0.976984	0.0495882	OGG1	Mitochondrial glycosylase/lyase; repairs oxidative damage to mitochondrial DNA, contributes to UVA resistance, role in base-excision repair; Spider biofilm induced
C2_07240C_A	0.977174	0.00397426	UME1	Ortholog of C. dubliniensis CD36 : Cd36_73630, C. parapsilosis CDC317 : CPAR2_805330, C. auris B8441 : B9J08_000281 and Candida tenuis NRRL Y-1498 : CANTEDRAFT_119330
C1_04940C_A	0.979448	0.0127256		Ortholog(s) have ER membrane protein complex localization
C7_03110W_A	0.979513	0.00772322	PRE5	Alpha6 subunit of the 20S proteasome; regulated by Gcn4; induced in response to amino acid starvation (3-AT); Spider biofilm repressed
C4_06480C_A	0.979913	0.0313232		Ortholog of C. dubliniensis CD36 : Cd36_73740, Candida tropicalis NEW ASSEMBLY : CTRG1_05151, Candida tropicalis MYA-3404 : CTRG_05151 and Candida albicans WO-1 : CAWG_05736
C2_08780W_A	0.980972	0.00324486		Putative adhesin-like protein
C1_07490C_A	0.981021	0.00761062	MED9	RNA polymerase II mediator complex subunit; Hap43p-repressed gene
C1_07240W_A	0.981156	0.0126252		Protein with a tubulin binding cofactor C domain; flow model biofilm induced
C1_07080W_A	0.981292	0.0125445	NRG1	Transcription factor/repressor; regulates chlamydospore formation/hyphal gene induction/virulence and rescue/stress response genes; effects both Tup1 dependent and independent regulation; flow model biofilm induced; Spider biofilm repressed
C2_09640W_A	0.98179	0.00263815	TPO2	Putative polyamine transport protein; fungal-specific (no human or murine homolog)
C1_05410C_A	0.986727	0.00489962		Putative catechol o-methyltransferase; stationary phase enriched protein; transcription upregulated in clinical isolates from HIV+ patients with oral candidiasis; Spider biofilm repressed
C1_03290W_A	0.986775	0.00276273		Ortholog(s) have role in mRNA splicing, via spliceosome
C1_05240C_A	0.986854	0.00381728		Protein similarity to mutator-like element (MULE) transposase
CR_07360W_A	0.986892	0.0171156		Ortholog of C. dubliniensis CD36 : Cd36_25180, C. parapsilosis CDC317 : CPAR2_800030, C. auris B8441 : B9J08_001485 and Candida tenuis NRRL Y-1498 : CANTEDRAFT_125790
C7_03870W_A	0.988026	0.00143143	ZCF38	Putative Zn(II)2Cys6 transcription factor
CR_10260W_A	0.988319	0.0263885	PCK1	Phosphoenolpyruvate carboxykinase; glucose, C-source, yeast-hypha, Hap43 regulated; fluconazole, phagocytosis, H2O2, oral candidasis, Spider/rat catheter/flow model biofilm induced; repressed in biofilm by Bcr1, Tec1, Ndt80, Rob1, Brg1
C6_01880W_A	0.991147	0.00343993	ALK2	N-Alkane inducible cytochrome P450
C6_01180C_A	0.991703	0.0214481	ATP17	Mitochondrial ATPase complex subunit; downregulated by Efg1p; flucytosine induced; caspofungin repressed
C1_00360W_A	0.997476	0.00237278	NAP1	Nucleosome assembly protein; mutants show constitutive filamentous growth; present in exponential and stationary growth phase yeast cultures
C2_02920W_A	1.00237	0.0321426		Ortholog of C. parapsilosis CDC317 : CPAR2_800380, Candida tenuis NRRL Y-1498 : CANTEDRAFT_114079, Pichia stipitis Pignal : psti_CGOB_00127 and Candida tropicalis MYA-3404 : CTRG_05490
C5_01270W_A	1.00374	0.00143143	LEU1	3-isopropylmalate dehydratase; antigenic in humans; repressed in hyphae; alkaline repressed; upregulated by human whole blood or PMNs; regulated by Sef1, Sfu1, and Hap43; rat catheter biofilm induced, Spider biofilm repressed
C5_04250W_A	1.00448	0.0431036		Protein with NADPH oxidoreductase containing flavin mononucleotide (FMN) domain; induced by nitric oxide
C1_05760C_A	1.00479	0.00496738	MMS22	Putative adapter subunit of E3 ubiquitin ligase complex, acts with cullin subunit Rtt101p in response to DNA damage; cell-cycle regulated periodic mRNA expression
CR_10660W_A	1.00759	0.0131324	SWC4	Subunit of the NuA4 histone acetyltransferase complex
C1_00560W_A	1.0099	0.0319079	RTT109	Histone acetyltransferase, mutants are sensitive to DNA damage, show decreased virulence in mice, decreased white-to-opaque switching and increased susceptibility to killing by macrophages
C6_00920W_A	1.01031	0.012977	MDH1	Mitochondrial malate dehydrogenase; regulated by Mig1, Tup1, white-opaque switch, phagocytosis; induced in high iron; antigenic during murine and human infection; repressed in Spider biofilms by Bcr1, Tec1, Ndt80, Rob1, Brg1
CR_08310C_A	1.01458	0.014885		Putative subtilisin-family protease; mutation confers hypersensitivity to toxic ergosterol analog
C2_06890C_A	1.01461	0.0102165	BUD22	Protein with a predicted role in 18S rRNA maturation and small ribosomal subunit biogenesis; repressed in core stress response; repressed by prostaglandins
CR_00740C_A	1.01833	0.0308997		Ortholog(s) have alpha-1,4-glucosidase activity, role in N-glycan processing, polysaccharide biosynthetic process and endoplasmic reticulum lumen, glucosidase II complex localization
CR_06100C_A	1.02506	0.0490109	BMT3	Beta-mannosyltransferase; adds 2nd beta-mannose to the acid-stable fraction of cell wall phosphopeptidomannan, elongation of beta-mannose chains on the phosphopeptidomannan acid-labile fraction; Hap43-induced; Spider biofilm induced
C1_09880C_A	1.02702	0.0164541	GSY1	UDP glucose/starch glucosyltransferase; transcript repressed by yeast-hyphal switch, Efg1-regulated; strong oxidative stress induced; colony morphology-related regulation by Ssn6; stationary phase enriched; flow model biofilm induced
C5_03250W_A	1.02776	0.0403176		Ortholog(s) have actin monomer binding, polysome binding, protein kinase inhibitor activity, ribosome binding activity and role in negative regulation of protein phosphorylation
C2_07040W_A	1.02915	0.00698603	TMA19	Cell wall protein, ortholog of S. cerevisiae Tma19p (Ykl065cp)
CR_09680C_A	1.03452	0.0164941		Ortholog(s) have peptidase activity, role in protein targeting to ER, signal peptide processing and endoplasmic reticulum, signal peptidase complex localization
C1_10060C_A	1.03681	0.0178393		Predicted membrane transporter, member of the drug:proton antiporter (12 spanner) (DHA1) family, major facilitator superfamily (MFS)
C2_03220C_A	1.03749	0.00908535	LYS12	Homoisocitrate dehydrogenase; catalyzes 4th step in the alpha-aminoadipate pathway of lysine biosynthesis; clade-associated gene expression; protein level decreases in stationary phase cultures; Spider biofilm repressed
C6_01310W_A	1.04064	0.0364711		Putative protein of unknown function; Hap43-induced; required for normal biofilm growth; F-12/CO2 early biofilm induced
C2_09800C_A	1.04296	0.042932		Putative RNA polymerase III transcription factor (TFIIIB) subunit; flucytosine repressed
C2_00730C_A	1.04446	0.0120369	SAS3	Similar to silencing proteins; increased transcription is observed upon fluphenazine treatment; rat catheter biofilm repressed
CR_08440W_A	1.05182	0.00143143	SHP1	Regulator of the type 1 protein phosphatase Glc7p activity, involved in control of morphogenesis, progression through the cell cycle and response to DNA damage
C7_02070W_A	1.05275	0.00966147		Protein similar to S. cerevisiae Pmr1p; amphotericin B induced; previously merged with orf19.2553; unmerged from orf19.2553 in a revision of Assembly 21
C2_08150W_A	1.05327	0.0437867		Predicted intermediate filament protein; required for nuclear and mitochondrial transmission to daughter buds in S. cerevisiae; Spider biofilm induced
C2_09660W_A	1.05396	0.043397	SEC4	Small GTPase of Rab family; role in post-Golgi secretion; possible C-terminal palmitoylation; downregulated on adherence to polystyrene; localizes to the Spitzenkorper during hyphal growth; functional homolog of S. cerevisiae Sec4p
C6_04600W_A	1.05599	0.00343993		Putative S-adenosylmethionine-dependent methyltransferase; Hap43p-induced gene
CR_03920C_A	1.05718	0.0271056	HST2	Putative histone deacetylase; role in regulation of white-opaque switch; Spider biofilm induced
C1_05740C_A	1.06047	0.00761062		Pseudogene; formerly an ORF Predicted by Annotation Working Group
C4_07220C_A	1.06192	0.0106055	HNM3	Putative transporter; Hap43, flucytosine repressed; possibly essential, disruptants not obtained by UAU1 method; Spider biofilm induced
C1_08440C_A	1.06231	0.00554789		Putative dethiobiotin synthetase; transcript upregulated in clinical isolates from HIV+ patients with oral candidiasis; Hap43-repressed; GlcNAc-induced protein; Spider biofilm induced
CR_10310W_A	1.06448	0.0214481	OPT1	Oligopeptide transporter; transports 3-to-5-residue peptides; alleles are distinct, one has intron; suppresses S. cerevisiae ptr2-2 mutant defects; induced by BSA or peptides; Stp3p, Hog1p regulated; flow model biofilm induced
C7_04250W_A	1.06999	0.00335939		S. pombe ortholog SPAC2C4.06c is a predicted tRNA (cytosine-5-)-methyltransferase; Spider biofilm induced
C5_04800W_A	1.07482	0.00237278		Protein of unknown function; Spider biofilm induced
C1_09900W_A	1.07906	0.0304978	ADH5	Putative alcohol dehydrogenase; regulated by white-opaque switch; fluconazole-induced; antigenic in murine infection; regulated by Nrg1, Tup1; Hap43, macrophage repressed, flow model biofilm induced; Spider biofilm induced
CR_03380W_A	1.07986	0.00733774	OPT3	Oligopeptide transporter; transcript induced by macrophage phagocytosis, BSA or peptides; fluconazole-induced; induced by Rim101 at pH 8; virulence-group-correlated expression; Hap43-repressed; Spider biofilm induced
C2_10070W_A	1.08138	0.0303749		Ortholog of C. dubliniensis CD36 : Cd36_27230, C. parapsilosis CDC317 : CPAR2_801320, C. auris B8441 : B9J08_002705 and Candida tenuis NRRL Y-1498 : CANTEDRAFT_113198
C4_05200C_A	1.0823	0.0120369		Ortholog(s) have small ribosomal subunit rRNA binding activity
C3_03710W_A	1.08233	0.0234379		Predicted protein of rapamycin resistance; Spider biofilm induced
C4_05840W_A	1.084	0.00554789		C2H2 transcription factor; induced by Mnl1 under weak acid stress
C6_04320C_A	1.08568	0.0253064		Protein of unknown function; Hap43-repressed gene; repressed by nitric oxide
C1_02070W_A	1.08664	0.0235313		Ortholog of C. dubliniensis CD36 : Cd36_27680, C. parapsilosis CDC317 : CPAR2_801140, C. auris B8441 : B9J08_004087 and Candida tenuis NRRL Y-1498 : CANTEDRAFT_129982
C2_01630W_A	1.08829	0.0115919		Ortholog(s) have alpha-tubulin binding, microtubule binding activity, role in cytoplasmic microtubule organization, post-chaperonin tubulin folding pathway, protein folding and cytoplasm localization
C1_06000W_A	1.09157	0.0415587	INN1	Protein with similarity to S. cerevisiae Inn1p, which is an essential protein of the contractile actomyosin ring required for ingression of the plasma membrane into the bud neck during cytokinesis; contains a C2 membrane targeting domain
C6_03220W_A	1.09441	0.00510094		Protein with similarity to carbonic anhydrases
C2_08580W_A	1.09463	0.0445624	PGM2	Ortholog of S. cerevisiae Pgm2; induced in planktonic culture; Tye7p-regulated; flow model biofilm induced; rat catheter biofilm repressed
C5_03880C_A	1.09602	0.00943054		Protein of unknown function; induced by nitric oxide independent of Yhb1p
C3_06510C_A	1.09987	0.0055754		Putative ornithine transport protein; localized to the mitochondrial membrane
C2_07350W_A	1.10062	0.0328531		Ortholog of C. dubliniensis CD36 : Cd36_28090, C. parapsilosis CDC317 : CPAR2_802560, C. auris B8441 : B9J08_000343 and Candida tenuis NRRL Y-1498 : CANTEDRAFT_104949
C1_08740C_A	1.10114	0.00878339	ERV1	Predicted component of the mitochondrial intermembrane space (IMS), involved in protein import into mitochondrial intermembrane space
C1_04750W_A	1.10127	0.00943054	RPL28	Putative ribosomal protein; Plc1-regulated; downregulated upon phagocytosis by murine macrophage; Spider biofilm repressed
C1_03470C_A	1.10284	0.0248163	ZCF11	Zn(II)2Cys6 transcription factor; required for wild-type filamentous growth; mRNA binds She3
C4_03440C_A	1.10287	0.0195003	DOM34	Endonuclease involved in regulation of translation; stimulates translation of protein O-mannosyltransferase family which includes PMT1, PMT2, PMT4, PMT5, and PMT6; peloto ortholog; Hap43-repressed gene
C4_02660W_A	1.10833	0.00796237		Ortholog of C. dubliniensis CD36 : Cd36_28190, C. parapsilosis CDC317 : CPAR2_802530, Candida tenuis NRRL Y-1498 : CANTEDRAFT_109615 and Debaryomyces hansenii CBS767 : DEHA2A12650g
C3_05920W_A	1.11008	0.00911951		Ortholog(s) have role in mitochondrial translation and mitochondrion localization
C2_10150W_A	1.11297	0.0217649	SYN8	Putative endosomal SNARE; role in protein transport; rat catheter and Spider biofilm induced
CR_06670W_A	1.11544	0.0473091		Putative aminotransferase; Hap43-repressed; homozygous Tn insertion decreases colony wrinkling in filament-inducing conditions, does not block true hypha formation in liquid media; rat catheter and Spider biofilm induced
C7_02810W_A	1.11781	0.0126898	IFR2	Zinc-binding dehydrogenase; induced by benomyl, ciclopirox olamine, alpha pheromone, Hap43; regulated by oxidative stress via Cap1, osmotic stress via Hog1; protein present in exponential and stationary phase; rat catheter biofilm repressed
C1_06610C_A	1.11914	0.0142808	IME2	Putative serine/threonine protein kinase; mutation confers hypersensitivity to amphotericin B
C3_00370C_A	1.12092	0.0208072		Ortholog(s) have aldehyde dehydrogenase (NAD+) activity, role in response to furfural and intracellular localization
CR_03880W_A	1.12227	0.034958		Putative transcription factor with zinc finger DNA-binding motif
C3_04160W_A	1.12627	0.00761062		Ortholog(s) have role in endonucleolytic cleavage in 5'-ETS of tricistronic rRNA transcript (SSU-rRNA, 5.8S rRNA and LSU-rRNA), more
CR_01410C_A	1.13762	0.0452901	KTI12	Protein similar to S. cerevisiae Kti12p, which associates with Elongator complex; has a role in resistance to killer toxin; predicted Kex2p substrate; Hap43p-induced gene
C6_01460C_A	1.14077	0.0309855	MTG1	Putative mitochondrial GTPase; likely essential for respiratory competence and in large ribosomal subunit assembly; mitochondrial translation; Spider biofilm induced
C1_04800C_A	1.14167	0.0103986	YKU80	Yku70p-Yku80p Ku complex subunit involved in nonhomologous end joining during double-strand break repair repair; Hap43-repressed gene; flow model biofilm induced
C4_05690W_A	1.14201	0.0082442		Protein with a histone fold domain; similar to TAFII47 proteins from S. cerevisiae, Danio rerio, Drosophila melanogaster, human, and mouse
C2_09500W_A	1.14489	0.00908535	DEM1	Putative mitochondrial exonuclease; alpha-factor induced
C3_06210C_A	1.14789	0.013459		Mitochondrial inner membrane protein; mammalian mitofilin domain; Spider biofilm repressed
C2_04700C_A	1.14978	0.0203167		Has domain(s) with predicted role in anaphase-promoting complex-dependent catabolic process, regulation of mitotic metaphase/anaphase transition and anaphase-promoting complex localization
C5_04400W_A	1.15083	0.0227966	YVH1	Putative dual specificity phosphatase (phosphoserine/threonine and phosphotyrosine phosphatase); required for wild-type growth rate and for wild-type virulence in mouse model of systemic infection; Hap43p-induced gene
C7_02890C_A	1.15122	0.0103945		Ortholog(s) have role in retrograde vesicle-mediated transport, Golgi to endoplasmic reticulum and COPI vesicle coat localization
C1_00490C_A	1.15171	0.0131913	VTC3	Putative polyphosphate synthetase; downregulated in core caspofungin response; Hog1p-induced; transcription is opaque-specific; fungal-specific (no human or murine homolog)
C1_10050W_A	1.1521	0.0297536	IFF3	Putative GPI-anchored protein
CR_10070C_A	1.15263	0.00296774	SMC1	Protein similar to chromosomal ATPases; RNA abundance regulated by tyrosol and cell density; cell-cycle regulated periodic mRNA expression
CR_03570C_A	1.15287	0.0298455		Predicted transmembrane transporter; rat catheter and Spider biofilm induced
CR_10810C_A	1.15547	0.0265944	PRP13	Putative integral inner mitochondrial membrane protein with similarity to exonucleases
CR_06030C_A	1.15669	0.0171306	HGT3	Putative glucose transporter of the major facilitator superfamily; the C. albicans glucose transporter family comprises 20 members; 12 probable membrane-spanning segments, extended C terminus; expressed in rich medium with 2% glucose
CR_00380W_A	1.15728	0.00155453	IFF9	Predicted GPI-linked cell-wall protein; similar to Hyr1; induced in low iron; possibly an essential gene, disruptants not obtained by UAU1 method
C4_06690C_A	1.15767	0.00296781	TPO4	Putative sperimidine transporter; fungal-specific (no human or murine homolog); Spider biofilm induced; promoter bound by Tec1 and Ndt80; Bcr1-repressed in RPMI a/a biofilms
C3_03980C_A	1.15929	0.02179		Protein required for fusion of cvt-vesicles and autophagosomes with the vacuole; plays a role in autophagy, protein targeting to vacuole and vesicle docking; flow model biofilm induced
C3_05130C_A	1.16205	0.0171306		Protein of unknown function; rat catheter and Spider biofilm induced
C1_10260C_A	1.16409	0.0495882	RPT4	26S proteasome regulatory subunit; regulated by Gcn2p and Gcn4p; protein level decreases in stationary phase cultures
C1_10040W_A	1.16479	0.00834771		Ortholog(s) have role in mitotic spindle pole body duplication, proteasome-mediated ubiquitin-dependent protein catabolic process, regulation of kinase activity, spindle pole body duplication
C5_02550C_A	1.17082	0.0328902	SPT14	Putative DNA-binding transcription factor; predicted role in regulation of biogenesis of the cell wall; upregulated in biofilm; protein newly produced during adaptation to the serum
C7_00970C_A	1.17633	0.0235758	SEC63	Endoplasmic reticulum (ER) protein-translocation complex subunit
C4_00720W_A	1.18167	0.00761062	EAF7	Subunit of the NuA4 histone acetyltransferase complex
CR_03360W_A	1.18189	0.00609351		Ortholog(s) have S-adenosylmethionine-dependent methyltransferase activity and role in translational readthrough
C3_00990C_A	1.18862	0.0211972		Protein of unknown function
CR_01780W_A	1.18921	0.0281075		Protein with a UV radiation resistance protein/autophagy-related protein 14 domain; Hap43p-induced gene; mutants are viable
C1_02990C_A	1.1905	0.048299	RBR2	Cell wall protein; expression repressed by Rim101; transcript regulated upon white-opaque switching; repressed by alpha pheromone in SpiderM medium; macrophage-induced gene
C7_03300C_A	1.19144	0.00802916	GPI2	Subunit of the GPI-N-acetylglucosaminyl transferase (GPI-GnT) that catalyzes the first step in GPI anchor biosynthesis
C2_05070W_A	1.19443	0.0218219	LAP3	Putative aminopeptidase; positively regulated by Sfu1; clade-associated gene expression; virulence-group-correlated expression; induced by alpha pheromone in SpiderM medium; Hap43-induced; Spider and flow model biofilm induced
CR_07080W_A	1.19857	0.0403176		Has domain(s) with predicted palmitoyl-(protein) hydrolase activity and role in cellular protein modification process
C2_02850W_A	1.20698	0.0495882		Has domain(s) with predicted 2-oxoglutarate-dependent dioxygenase activity and role in oxidation-reduction process
C3_05080W_A	1.20902	0.00276273	FUM11	Fumarate hydratase; induced in high iron; protein in exponential and stationary-phase yeast cells, but higher in stationary phase; rat catheter biofilm repressed
C2_04090W_A	1.21248	0.0485029	RPR2	Ortholog(s) have ribonuclease P activity, role in intronic box C/D snoRNA processing, tRNA processing and nucleolar ribonuclease P complex localization
C3_01430W_A	1.21274	0.0122531	CDC10	Septin, required for wild-type cell, hyphal, or chlamydospore morphology; role in virulence and kidney tissue invasion in mouse infection; forms ring at sites of cell division and filaments in mature chlamydospore; Spider biofilm repressed
C4_01420W_A	1.21306	0.0371187		Ortholog(s) have structural constituent of ribosome activity and mitochondrial large ribosomal subunit localization
C3_04870W_A	1.21406	0.0271852		Protein of unknown function; transcript detected on high-resolution tiling arrays
CR_10330W_A	1.21418	0.0147123		Has domain(s) with predicted membrane localization
CR_05280W_A	1.2191	0.0375504	RPB8	Putative subunit of RNA polymerases I, II, and III; regulated by Gcn4p; repressed in response to amino acid starvation (3-aminotriazole treatment); heterozygous null mutant exhibits resistance to parnafungin
C1_14020W_A	1.22465	0.0168708	RPS3	Ribosomal protein S3; Hog1, Hap43-induced; grepressed upon phagocytosis by murine macrophage; present in exponential and stationary phase cells; Spider biofilm repressed
C3_06890W_A	1.22733	0.0207453		Protein of unknown function; Hap43-induced; rat catheter and Spider biofilm induced
C7_02880C_A	1.22763	0.019234	PGA39	Putative GPI-anchored protein
CR_10410C_A	1.22922	0.0405321		Protein of unknown function; Spider biofilm induced
CR_00650W_A	1.22947	0.0370659	VMA13	Predicted proton-transporting ATPase; predicted role in ATP hydrolysis coupled proton transport; rat catheter biofilm repressed
C2_05840W_A	1.232	0.0328531	HGT9	Putative glucose transporter of the major facilitator superfamily; the C. albicans glucose transporter family comprises 20 members; 12 probable membrane-spanning segments; induced at low (0.2%, compared to 2%) glucose in rich media; intron
C4_02800W_A	1.23307	0.0257379		Has domain(s) with predicted protein phosphatase binding activity and role in regulation of phosphoprotein phosphatase activity
C5_01970C_A	1.2354	0.00539711		S. cerevisiae ortholog YDR370C/DXO1 has decapping and 5&#8242;-3&#8242; exoRNase activity; decreased transcription is observed upon fluphenazine treatment or in an azole-resistant strain that overexpresses CDR1 and CDR2
C7_00530C_A	1.23576	0.00335939	FGR13	Protein encoded in retrotransposon Zorro3 with a potential zinc finger; lacks an ortholog in S. cerevisiae; transposon mutation affects filamentous growth
C1_05500W_A	1.23643	0.0490203		Ortholog of Candida albicans WO-1 : CAWG_01857
C6_04070C_A	1.24144	0.0242347	IFE2	Putative alcohol dehydrogenase; yeast-enriched transcript; Efg1-regulated; induced by prostaglandins, Hog1, fluconazole; rat catheter biofilm induced
CR_00680W_A	1.24278	0.0244779	CSP1	Putative cell wall associated protein; gene only found in C. albicans and C. dubliniensis; highly upregulated during chlamydospore development in both species; localized to chlamydospore cell wall
C1_10020W_A	1.25077	0.0102165		Putative 3-hydroxyanthranilic acid dioxygenase, involved in NAD biosynthesis; Hap43p-repressed gene
C3_04740C_A	1.25451	0.00707377		Protein of unknown function; Hap43-repressed; Spider biofilm repressed
C2_05980C_A	1.25637	0.0152456		Ortholog(s) have dicarboxylic acid transmembrane transporter activity, role in mitochondrial transport and mitochondrial inner membrane, mitochondrion localization
C4_04380C_A	1.25861	0.00642149		Putative TFIIH and nucleotide excision repair factor 3 complex subunit; possibly an essential gene, disruptants not obtained by UAU1 method
C3_07810C_A	1.25986	0.0271887	MTG2	Putative Obg family GTPase member; peripheral protein of the mitochondrial inner membrane; associates with the large ribosomal subunit; required for mitochondrial translation; rat catheter biofilm repressed
C1_04020C_A	1.26559	0.0395656		Protein of unknown function; 2 predicted transmembrane domains; transcript detected on high-resolution tiling arrays; flow model biofilm induced; Spider biofilm repressed
C1_06740C_A	1.26816	0.0456328	TPS1	Trehalose-6-phosphate synthase; role in hyphal growth and virulence in mouse systemic infection; induced in presence of human neutrophils; macrophage/pseudohyphal-repressed after 16h; stationary phase enriched protein; Hap43-repressed
C3_05140C_A	1.27455	0.0224661	ISC1	Mitochondrial membrane localized inositol phosphosphingolipid phospholipase C; hydrolyzes complex sphingolipids to produce ceramide; mutant is viable
C4_03500C_A	1.28118	0.0114962		Protein of unknown function; rat catheter biofilm repressed
C7_02010C_A	1.28229	0.00827673		Predicted homeodomain-containing protein; possible transcription factor; possibly transcriptionally regulated upon hyphal formation
C6_03060W_A	1.28649	0.020737		Ortholog(s) have acetyltransferase activator activity, histone binding activity
C2_08360C_A	1.28675	0.0338979		Ortholog(s) have GTPase activator activity, role in activation of GTPase activity and endosome, trans-Golgi network localization
C2_03350W_A	1.29071	0.046332		Has domain(s) with predicted carbohydrate binding, catalytic activity and role in carbohydrate metabolic process
CR_03630W_A	1.29538	0.0434575		Ortholog of C. dubliniensis CD36 : Cd36_31580, C. parapsilosis CDC317 : CPAR2_205000, Debaryomyces hansenii CBS767 : DEHA2G10846g and Pichia stipitis Pignal : PICST_32988
C2_05970C_A	1.29862	0.0011798	ADE13	Adenylosuccinate lyase; enzyme of adenine biosynthesis; soluble protein in hyphae; not induced during GCN response, in contrast to the S. cerevisiae ortholog; repressed by nitric oxide
C1_02360C_A	1.29977	0.0110518	ARC40	Protein similar to S. cerevisiae Arc40; involved in actin filament organization in S. cerevisiae; transposon mutation affects filamentous growth; rat catheter and Spider biofilm repressed
C6_01810W_A	1.29993	0.0237116		Predicted cation transmembrane transporter; Spider biofilm induced
C2_02790C_A	1.30177	0.0458343	FGR50	Protein lacking an ortholog in S. cerevisiae; transposon mutation affects filamentous growth; Spider biofilm repressed
C3_03460C_A	1.30305	0.00727598	PGI1	Glucose-6-phosphate isomerase; enzyme of glycolysis; antigenic; Efg1-regulated; induced upon adherence to polystyrene; repressed by phagocytosis, human neutrophils; flow model biofilm induced; rat catheter and Spider biofilm repressed
CR_05090C_A	1.3144	0.0248163		Protein of unknown function; induced by nitric oxide; predicted ORF from Assembly 19; removed from Assembly 20; restored based on transcription data
C1_09870W_A	1.31689	0.00624636		Putative protein involved in apoptosis; Spider biofilm induced
C3_06660C_A	1.31897	0.0274876	STE2	Receptor for alpha factor mating pheromone, MFalpha; required for a-type cells to respond to alpha factor, for opaque a-form mating and white a-form response; possible Kex2p substrate; a-specific, alpha-factor induced, A1p-Alpha2p repressed
C4_03520C_A	1.32592	0.0483475	CFL11	Superoxide-generating NADPH oxidase, produces extracellular burst of reactive oxygen species at growing cell tips during hyphal morphogenesis, flucytosine repressed; possibly adherence-induced; rat catheter biofilm repressed
C2_02550C_A	1.33359	0.00296781	SOL3	Putative 6-phosphogluconolactonase; present in exponential and stationary growth phase yeast cultures; macrophage-downregulated protein; Spider biofilm repressed
C2_04440W_A	1.33368	0.0415587	NMD3	Putative nonsense-mediated mRNA decay protein; repressed in core stress response; repressed by prostaglandins
CR_01630C_A	1.33462	0.0176796	PUP2	Alpha5 subunit of the 20S proteasome; macrophage/pseudohyphal-repressed; regulated by Gcn2p and Gcn4p; protein present in exponential and stationary growth phase yeast cultures
CR_07060C_A	1.3358	0.00466052		Ortholog(s) have histone deacetylase activity
C2_04450W_A	1.34029	0.00237278		Ortholog(s) have mitochondrion localization
C1_13290W_A	1.34869	0.00344796		Ortholog of S. cerevisiae : KSH1, C. dubliniensis CD36 : Cd36_32390, C. parapsilosis CDC317 : CPAR2_203260, C. auris B8441 : B9J08_004567 and Candida tenuis NRRL Y-1498 : CANTEDRAFT_116778
C1_10660W_A	1.35287	0.00143143		Protein similar to ferric reductase Fre10p
C2_07620W_A	1.35384	0.00966147		Predicted component of U5 snRNP; Spider biofilm induced
CR_04080C_A	1.36675	0.0162241	MIS11	Predicted mitochondrial C1-tetrahydrofolate synthase precursor; putative protein of glycine catabolism; repressed by Efg1; fluconazole-induced; stationary phase enriched protein; rat catheter and Spider biofilm repressed
CR_10540C_A	1.36717	0.0028002	CRZ2	C2H2 transcription factor, involved in regulation of early adaptation to murine GI tract; Rim101-repressed at pH 8; required for yeast cell adherence to silicone substrate; Spider biofilm induced
C3_06370C_A	1.38585	0.048299	ALS3	Cell wall adhesin; epithelial adhesion, endothelial invasion; alleles vary in adhesiveness; immunoprotective in mice; binds SspB adhesin of S. gordonii in mixed biofilm; induced in/required for Spider biofilm; flow model biofilm repressed
CR_10380C_A	1.39853	0.0189385		Ortholog of S. cerevisae/S. pombe Tif6; constituent of 66S pre-ribosomal particles; Spider biofilm induced
C3_07980C_A	1.40243	0.00466227	GLK1	Putative glucokinase; transcript regulated upon yeast-hyphal switch; Efg1 regulated; fluconazole-induced; induced in core stress response; colony morphology-related gene regulation by Ssn6; GlcNAc-induced protein
C1_03870C_A	1.41128	0.0371187		Homolog of nuclear distribution factor NudE, NUDEL; regulates dynein targeting to microtubule plus ends; flow model biofilm repressed
CR_06610W_A	1.41327	0.0152456		Protein similar to ferric reductase Fre10p; possibly an essential gene, disruptants not obtained by UAU1 method
C5_03050C_A	1.41817	0.00276273		Ortholog of S. cerevisiae Mrpl4, a mitochondrial ribosomal protein of the large subunit; repressed by nitric oxide
CR_01910C_A	1.4182	0.0195003	SMX4	Component of heteroheptameric complexes (Lsm1p, Lsm8p) involved in RNA processing and decay; flucytosine induced
C4_05580C_A	1.4196	0.0224661		Ortholog of C. dubliniensis CD36 : Cd36_32970, C. parapsilosis CDC317 : CPAR2_701710, C. auris B8441 : B9J08_000571 and Candida tenuis NRRL Y-1498 : CANTEDRAFT_106599
C2_00550W_A	1.42065	0.0416955	PIF1	DNA helicase and 3'-5' exonuclease; decreased transcription is observed upon fluphenazine treatment
C1_05620C_A	1.42788	0.0342133	GLK4	Putative glucokinase; decreased expression in hyphae compared to yeast-form cells
CR_06720W_A	1.4415	0.0485029	ECM22	Zn(II)2Cys6 transcription factor; rat catheter and Spider biofilm induced
C4_06900W_A	1.44592	0.0171306	RGD3	Putative Rho GTPase activating protein; fungal-specific (no human or murine homolog)
C1_12720C_A	1.44779	0.0452319		Adaptor protein required for specific mRNA transport; protein similar but not orthologous to S. cerevisiae She3; transposon mutation affects filamentous growth
C4_06640C_A	1.44817	0.0391298	EMP24	COPII-coated vesicle component
CR_07950W_A	1.45254	0.0358719		Ortholog(s) have DNA binding, DNA-dependent ATPase activity, chromatin binding activity
C7_03550C_A	1.4529	0.0148074	RPS27	Putative ribosomal protein; repressed upon phagocytosis by murine macrophage; Spider biofilm repressed
C6_00230W_A	1.4591	0.00772322		Ortholog(s) have ATPase activator activity, role in positive regulation of ATPase activity, vacuolar transport and cytoplasm, endosome localization
C2_00410C_A	1.4611	0.0321126		Ortholog(s) have signal recognition particle binding activity, role in protein targeting to ER and integral component of endoplasmic reticulum membrane, signal recognition particle receptor complex localization
CR_03300C_A	1.47727	0.021525		Ortholog of C. dubliniensis CD36 : Cd36_33320, C. parapsilosis CDC317 : CPAR2_701970, C. auris B8441 : B9J08_000885 and Candida tenuis NRRL Y-1498 : CANTEDRAFT_116124
C1_11490C_A	1.48585	0.0404573		Has aminoglycoside phosphotransferase and protein kinase domains; rat catheter and flow model biofilm induced
C6_02210W_A	1.48895	0.00466052	PTC6	Mitochondrial protein phosphatase of the Type 2C-related family (serine/threonine-specific), functional homolog of S. cerevisiae Ptc6p; mutant shows virulence defect
C1_03990W_A	1.4905	0.0145036	YHB1	Nitric oxide dioxygenase; acts in nitric oxide scavenging/detoxification; role in virulence in mouse; transcript activated by NO, macrophage interaction; Hap43, hypha repressed; mRNA binds She3
C1_13730C_A	1.49477	0.0443321		Ortholog of S. cerevisiae : AIM32, C. glabrata CBS138 : CAGL0L01529g, C. dubliniensis CD36 : Cd36_33550, C. parapsilosis CDC317 : CPAR2_702070 and C. auris B8441 : B9J08_002833
C2_02430W_A	1.49619	0.0493483	EFG1	bHLH transcription factor; required for white-phase cell type, RPMI and Spider biofilm formation, hyphal growth, cell-wall gene regulation; roles in adhesion, virulence; Cph1 and Efg1 have role in host cytokine response; binds E-box
C2_10730W_A	1.50172	0.00176175		Ortholog(s) have cytosol localization
C7_03250C_A	1.50976	0.0154419	IMP4	Putative SSU processome component; Hap43-induced; repressed by prostaglandins; Spider biofilm induced
C3_01640C_A	1.51435	0.00911951		Protein with an aspartate aminotransferase domain; Gcn4-regulated
C4_06150C_A	1.53005	0.0104892	NOP10	Small nucleolar ribonucleoprotein; flucytosine induced
C2_01120W_A	1.53402	0.018431		Ortholog of S. cerevisiae YNL092W and S. pombe SPBC1778.07; a putative N2227-like methyltransferase; Hap43-repressed gene
C4_02230C_A	1.53529	0.0325754	PTP1	Phosphotyrosine-specific protein phosphatase; rat catheter biofilm induced
CR_10690W_A	1.53902	0.0257115	RPS20	Putative ribosomal protein; repressed upon phagocytosis by murine macrophage; transcript positively regulated by Tbf1; Spider biofilm repressed
C7_03140W_A	1.541	0.022483		Ortholog(s) have protein C-terminal leucine carboxyl O-methyltransferase activity and role in C-terminal protein methylation, cellular protein-containing complex assembly, regulation of autophagy
C2_09810C_A	1.54179	0.00678773	HSP104	Heat-shock protein; roles in biofilm and virulence; complements chaperone, prion activity in S. cerevisiae; guanidine-insensitive; heat shock/stress induced; repressed in farnesol-treated biofilm; sumoylation target; Spider biofilm induced
C1_13800C_A	1.54261	0.0307967		Putative Arf3p GTPase activating protein; Hap43p-repressed gene; possibly an essential gene, disruptants not obtained by UAU1 method
C1_04870W_A	1.5503	0.0255694		S. pombe ortholog SPBC460.04c is a predicted sulfonate/alpha-ketoglutare dioxygenase; induced by nitric oxide; Spider biofilm induced
C2_06340W_A	1.55186	0.0485029		Ortholog(s) have nuclear import signal receptor activity, role in inositol metabolic process, protein import into nucleus and nuclear envelope localization
C1_10950C_A	1.55722	0.0220649		Ortholog(s) have adenyl-nucleotide exchange factor activity and role in SRP-dependent cotranslational protein targeting to membrane, translocation
C1_04930C_A	1.56095	0.0286005	RPP2A	Acidic ribosomal protein; likely role in translation elongation regulation; interacts with Rpp1B; 1 of 4 similar ribosomal proteins (Rpp1A, Rpp1B, Rpp2A, Rpp2B); CUG start codon; upstream uORFs; Tbf1-induced; Spider biofilm repressed
C4_03670W_A	1.56675	0.0297642	GSH2	Putative glutathione synthase; induced in high iron; heavy metal (cadmium) stress-induced
C5_02590C_A	1.57052	0.0437183		Ortholog(s) have role in ribosomal large subunit biogenesis
C6_04420W_A	1.57471	0.00994171		Protein similar to S. cerevisiae Vac14p; a protein involved in regulated synthesis of PtdIns(3,5)P(2); transposon mutation affects filamentous growth
C1_00550W_A	1.61029	0.0164545		Protein of unknown function; rat catheter biofilm induced
C3_06780C_A	1.61701	0.0499557		Ortholog of C. parapsilosis CDC317 : CPAR2_205710, C. auris B8441 : B9J08_000119, Candida tenuis NRRL Y-1498 : CANTEDRAFT_117073 and Debaryomyces hansenii CBS767 : DEHA2A11462g
C3_03570C_A	1.63157	0.0373894		Ortholog of C. dubliniensis CD36 : Cd36_34210, C. parapsilosis CDC317 : CPAR2_205590, C. auris B8441 : B9J08_004911 and Candida tenuis NRRL Y-1498 : cten_CGOB_00133
C7_04080C_A	1.65159	0.00328968		Ortholog(s) have GTPase activator activity
C1_10580C_A	1.65525	0.0348758	ECI1	Protein similar to S. cerevisiae Eci1p, which is involved in fatty acid oxidation; transposon mutation affects filamentous growth; expression is regulated upon white-opaque switching
C1_04010C_A	1.66954	0.0348758	PEX13	Protein required for peroxisomal protein import mediated by PTS1 and PTS2 targeting sequences; transcript induced in an RHE model of oral candidiasis; Hap43-repressed gene
C1_11020W_A	1.67572	0.0165612		Putative cystathionine gamma-synthase; decreased levels in stationary phase cultures; Hog1p-induced; Gcn4p-regulated
C7_01170C_A	1.67939	0.0288472		Has domain(s) with predicted DNA binding, nucleic acid binding activity
CR_03290C_A	1.69822	0.00624636		Aldo-keto reductase; increased transcript associated with MDR1 overexpression, benomyl or long-term fluconazole treatment; overexpression does not affect drug or oxidative stress sensitivity; stationary phase enriched; flow biofim repressed
C3_02800W_A	1.71597	0.013289	SSU1	Protein similar to S. cerevisiae Ssu1 sulfite transport protein; Tn mutation affects filamentous growth; regulated by Gcn2 and Gcn4; induced by nitric oxide; Hap43-repressed; Spider and flow model biofilm induced
CR_06550C_A	1.71907	0.0273716		Putative phytanoyl-CoA dioxygenase family protein; mutation confers hypersensitivity to 5-fluorocytosine (5-FC), 5-fluorouracil (5-FU), and tubercidin (7-deazaadenosine); induced by nitric oxide
CR_03370C_A	1.74883	0.00834771	PHO88	Protein with a role in phosphate transport; biofilm-regulated expression; amphotericin B repressed
C7_04070C_A	1.76499	0.0138858	PRE8	Putative alpha-2_sc subunit of proteasome; macrophage-induced protein; regulated by Gcn2p and Gcn4p; transcription is positively regulated by Tbf1p; stationary phase enriched protein
C1_07430W_A	1.78302	0.0223286	NUO1	NADH-ubiquinone oxidoreductase subunit with roles in mitochondrial respiratory chain complex I assembly
C1_04470C_A	1.80026	0.00775653	RTA4	Protein similar to S. cerevisiae Rsb1p, involved in fatty acid transport; transposon mutation affects filamentous growth; alkaline downregulated; caspofungin induced; possibly an essential gene; Hap43p-repressed
CR_04900C_A	1.80737	0.0139789	PLB3	GPI-anchored cell surface phospholipase B; possibly secreted; fungal-specific (no mammalian homolog); induced by Tbf1; fluconazole-induced; possible essential gene (UAU1 method); Spider and flow model biofilm induced
C1_05970W_A	1.84117	0.0128058	PMT5	Protein mannosyltransferase (PMT), expressed at extremely low levels; not required for wild-type hyphal growth, drug resistance, or virulence in mouse systemic infection; one of five PMT family members
CR_07300W_A	1.85595	0.00398622	ALO1	D-Arabinono-1,4-lactone oxidase involved in biosynthesis of dehydro-D-arabinono-1,4-lactone, which has a protective role against oxidative damage; plasma membrane-localized;required for full virulence in a mouse model of systemic infection
C4_06300C_A	1.88349	0.0139789	GNP3	Putative high-affinity glutamine permease; fungal-specific (no human or murine homolog)
C4_00290C_A	1.88369	0.0380828		Ortholog of S. cerevisiae : SPS4, C. glabrata CBS138 : CAGL0I09834g, C. dubliniensis CD36 : Cd36_35035, C. parapsilosis CDC317 : CPAR2_200810 and C. auris B8441 : B9J08_002747
C1_14560C_A	1.90728	0.00467287	FGR34	Protein lacking an ortholog in S. cerevisiae; transposon mutation affects filamentous growth
CR_01900C_A	1.92614	0.0260218		Ortholog of C. dubliniensis CD36 : Cd36_35095, C. parapsilosis CDC317 : CPAR2_200710, C. auris B8441 : B9J08_002757 and Candida tenuis NRRL Y-1498 : CANTEDRAFT_112338
C2_07790C_A	1.93448	0.0269869	ZCF39	Zn(II)2Cys6 transcription factor; mutants are viable; filament induced; required for yeast cell adherence to silicone substrate; Spider biofilm induced
C2_06550W_A	1.93952	0.0134418		Ortholog(s) have histone acetyltransferase activity, role in histone acetylation, replication-born double-strand break repair via sister chromatid exchange and Ada2/Gcn5/Ada3 transcription activator complex localization
C1_10980W_A	1.94809	0.0139789		Putative mitochondrial 2' O-ribose methyltransferase; predicted role in methylation of U(2791) in 21S rRNA; Spider biofilm induced
C4_00640W_A	1.94849	0.00466227		Protein with a predicted role in cytochrome c oxidase assembly; rat catheter biofilm induced
C1_11710C_A	1.97207	0.00845259		Ortholog(s) have Rab guanyl-nucleotide exchange factor activity
CR_10650W_A	2.0016	0.0226359	PUP1	Putative beta 2 subunit of the 20S proteasome; macrophage/pseudohyphal-repressed; Spider biofilm repressed
C7_02830C_A	2.02132	0.00554789		Ortholog of C. dubliniensis CD36 : Cd36_35262, Candida tropicalis NEW ASSEMBLY : CTRG1_05848, Candida tropicalis MYA-3404 : CTRG_05848 and Candida albicans WO-1 : CAWG_02290
C1_13180W_A	2.06942	0.0257115	PGA11	Putative GPI-anchored protein
C2_04210W_A	2.07852	0.0249946		Protein of unknown function; Hap43-induced gene; mutant is viable
C4_05920C_A	2.08506	0.00826325		Putative nucleolar protein with a predicted role in pre-18S rRNA processing; Plc1p-regulated; Spider biofilm induced
C3_05840W_A	2.16211	0.0166364	PGA1	Putative GPI-anchored protein; induced during cell wall regeneration; required for normal adhesion to host cells and for adherence during Sabouraud biofilm formation; Spider biofilm induced
C4_06910W_A	2.18734	0.0152324	EIF4E	Translation initiation factor eIF4E; genes encoding ribosomal subunits, translation factors, tRNA synthetases downregulated by phagocytosis by macrophage; alternatively spliced intron in 5' UTR; protein levels decrease in stationary phase
C1_07620C_A	2.28017	0.00807665		Ortholog of S. cerevisiae : YNL320W, C. glabrata CBS138 : CAGL0M04125g, C. dubliniensis CD36 : Cd36_35340, C. parapsilosis CDC317 : CPAR2_200350 and C. auris B8441 : B9J08_001244
C1_09590C_A	2.29578	0.0372982	MCD1	Alpha-kleisin cohesin complex subunit; for sister chromatid cohesion in mitosis and meiosis; repressed by alpha pheromone in SpiderM medium; periodic cell-cycle expression; Hap43-repressed; rat catheter and Spider biofilm repressed
C2_07530C_A	2.38707	0.00492948	LTV1	Putative GSE complex component; repressed by prostaglandins
C1_09580C_A	2.40754	0.0146972	CKA1	Putative alpha subunit (catalytic subunit) of protein kinase CK2; Cka1p and Cka2p have a common target with respect to fluconazole resistance; synthetically lethal with CKA2; flucytosine induced
C1_02690C_A	2.40933	0.00554789	POP3	Putative RNase MRP and nuclear RNase P component; decreased repressed by prostaglandins; Spider biofilm induced
C2_00050C_A	2.45245	0.0047248		Ortholog(s) have role in mitochondrial respiratory chain complex IV assembly and mitochondrial inner membrane localization
C2_00460W_A	2.5012	0.00817077		Predicted membrane transporter, member of the anion:cation symporter (ACS) family, major facilitator superfamily (MFS)
C3_04310C_A	2.60979	0.0178976	MAL2	Alpha-glucosidase; hydrolyzes sucrose for sucrose utilization; transcript regulated by Suc1, induced by maltose, repressed by glucose; Tn mutation affects filamentous growth; upregulated in RHE model; rat catheter and Spider biofilm induced
C5_03730W_A	3.32647	0.0438717		Ortholog(s) have protein-containing complex binding activity, role in endoplasmic reticulum unfolded protein response, ubiquitin-dependent ERAD pathway and endoplasmic reticulum localization

## Sheet: S3 Table-effect of Dox
Systematic Gene Name	Log2ratio sth1/STH1-MYC (+Dox/-Dox)	FDR	Standard Gene Name	Description
C1_02690C_A	-0.801909	0.999998		Predicted ORF from Assembly 19; removed from Assembly 20; subsequently reinstated in Assembly 21 based on comparative genome analysis
C1_05620C_A	1.60518	0.999998	STE3	Protein similar to S. cerevisiae Ste3p, the receptor for a-factor mating pheromone; alpha mating-type-specific transcription
C1_05830W_A	-2.12457	0.999998		Ortholog(s) have trans-aconitate 3-methyltransferase activity and cytosol localization
C1_07580C_A	2.18149	0.999998	PRY1	Pry family pathogenesis-related protein; extracellular; opaque specific transcript; repressed by alpha pheromone in SpiderM medium; possibly essential, disruptants not obtained by UAU1 method; Spider biofilm induced
C1_07620C_A	-0.640856	0.999998	PIR32	Cell wall protein, putative structural component of the cell wall; mutation leads to increased chitin content, increased virulence and resistance to stresses; macrophage-induced gene
C1_09300C_A	0.615782	0.999998		Has domain(s) with predicted metal ion binding activity
C1_09580C_A	-1.03597	0.999998	LIP1	Secreted lipase, member of a lipase gene family whose members are expressed differentially in response to carbon source and during infection; may have a role in nutrition and/or in creating an acidic microenvironment
C1_09590C_A	-0.746717	0.999998	LIP10	Secreted lipase, member of a lipase gene family whose members are expressed differentially in response to carbon source and during infection; may have a role in nutrition and/or in creating an acidic microenvironment
C1_10170W_A	0.746693	0.999998		Putative adhesin-like protein; Hap43-repressed; rat catheter and Spider biofilm induced
C1_12560C_A	0.789318	0.999998	DLH1	Functional homolog of S. cerevisiae Dmc1; a meiosis-specific protein required for repair of double-strand breaks and pairing between homologous chromosomes
C2_03710W_A	1.2451	0.999998	MNN41	Ortholog(s) have enzyme activator activity and role in protein N-linked glycosylation, protein O-linked glycosylation
C2_08150W_A	0.949979	0.999998		Ortholog of C. dubliniensis CD36 : Cd36_22330, C. parapsilosis CDC317 : CPAR2_805720, Candida tropicalis MYA-3404 : CTRG_01814 and Candida albicans WO-1 : CAWG_05906
C3_00990C_A	-0.675498	0.999998		Ortholog of S. cerevisiae : YGL138C, C. glabrata CBS138 : CAGL0H08910g, C. dubliniensis CD36 : Cd36_80910, C. parapsilosis CDC317 : CPAR2_102230 and C. auris B8441 : B9J08_002616
C3_01740C_A	0.823118	0.999998		Predicted ORF added to Assembly 21 based on sequence re-analysis
C3_03440C_A	-0.608106	0.999998		Putative spermidine export pump; fungal-specific (no human or murine homolog)
C3_03600C_A	-0.769437	0.999998	GTT12	Ortholog(s) have glutathione peroxidase activity, glutathione transferase activity, role in glutathione metabolic process, protein glutathionylation and endoplasmic reticulum localization
C3_06580W_A	-0.783408	0.999998	JEN1	Lactate transporter; induced by lactic acid, activated by Cat8; alkaline repressed by Rim101; localizes to plasma membrane; Spider biofilm induced
C4_00250W_A	0.934268	0.999998		Ortholog of Candida lusitaniae ATCC 42720 : CLUG_00275 and Candida albicans WO-1 : CAWG_03759
C4_00940W_A	-0.671346	0.999998		Ortholog(s) have ATPase activity, tRNA binding activity, role in protein urmylation, regulation of transcription by RNA polymerase II, tRNA wobble uridine modification and Elongator holoenzyme complex localization
C4_01330W_A	-0.956061	0.999998		Protein of unknown function; Spider biofilm induced
C4_03420C_A	-0.723745	0.999998		Ortholog of Candida albicans WO-1 : CAWG_03466
C4_03470C_A	-0.679491	0.999998	ECE1	Candidalysin, cytolytic peptide toxin essential for mucosal infection; hypha-specific protein; regulated by Rfg1, Nrg1, Tup1, Cph1, Efg1, Hog1, farnesol, phagocytosis; fluconazole-induced; rat catheter and Spider biofilm induced
C4_03670W_A	-0.865732	0.999998	SPO75	Ortholog(s) have role in ascospore formation, ascospore wall assembly
C4_04400C_A	-0.587218	0.999998		Protein of unknown function; Spider biofilm induced
C4_05580C_A	-0.863701	0.999998		Secreted protein; exogenously expressed protein is a substrate for Kex2 processing in vitro; fluconazole-regulated; Spider biofilm induced
C4_05920C_A	-0.617773	0.999998	PGA49	Putative GPI-anchored protein
C4_06380W_A	-0.588899	0.999998	SOU2	Protein similar to Sou1; not required for utilization of L-sorbose; Spider biofilm induced
C4_06920C_A	1.0839	0.999998	CSA2	Extracellular heme-binding protein involved in heme-iron acquisition; regulated by Tsa1, Tsa1B in minimal media at 37 deg; induced by ketoconazole, nitric oxide, Hap43; required for normal RPMI biofilm formation
C4_07150W_A	0.889682	0.999998		bZIP transcription factor; possibly transcriptionally regulated upon hyphal formation; Hap43; F-12/CO2 early biofilm induced; Spider biofilm induced
C5_01360W_A	-0.63227	0.999998	CFL4	C-terminus similar to ferric reductases; induced in low iron; Sfu1-repressed; ciclopirox olamine induced; colony morphology-related gene regulation by Ssn6; Hap43-repressed; Sef1-regulated
C5_01380W_A	-0.657496	0.999998	CFL5	Ferric reductase; induced in low iron; ciclopirox olamine, flucytosine induced; amphotericin B, Sfu1 repressed; Tbf1, Hap43 induced
C5_02200W_A	-0.669198	0.999998		Ortholog of C. dubliniensis CD36 : Cd36_52020, C. parapsilosis CDC317 : CPAR2_100400, C. auris B8441 : B9J08_002552 and Debaryomyces hansenii CBS767 : DEHA2F14278g
C5_03060C_A	-1.10679	0.999998	TNA1	Putative nicotinic acid transporter; detected at germ tube plasma membrane by mass spectrometry; transcript induced upon phagocytosis by macrophage; rat catheter biofilm induced
C5_03700C_A	-0.869511	0.999998		Ortholog(s) have diphthine synthase activity and role in peptidyl-diphthamide biosynthetic process from peptidyl-histidine
C5_05180W_A	0.781996	0.999998		Similar to S. pombe mug180, a predicted esterase/lipase; highly induced during chlamydospore formation in both C. albicans and C. dubliniensis; flow model biofilm induced
C6_03420W_A	-0.671557	0.999998		Ortholog(s) have role in DNA replication initiation, chromosome segregation, establishment of mitotic sister chromatid cohesion, mitotic spindle assembly checkpoint and condensed nuclear chromosome kinetochore localization
C7_00290C_A	-0.708302	0.999998	HGT13	Predicted sugar transporter, involved in glycerol utilization; member of the major facilitator superfamily; 12 transmembrane; gene has intron; oxidative stress-induced via Cap1p; expressed in rich medium, 2% glucose
C7_02070W_A	0.686849	0.999998	GRX1	Putative glutaredoxin; induced in low iron
CR_00930W_A	-0.738037	0.999998	ATO10	Putative fungal-specific transmembrane protein; rat catheter and Spider biofilm induced
CR_01920W_A	0.67759	0.999998		Ortholog(s) have adenosylmethionine-8-amino-7-oxononanoate transaminase activity and role in biotin biosynthetic process
CR_03790C_A	0.802515	0.999998	KRE1	Cell wall glycoprotein; beta glucan synthesis; increases glucan content in S. cerevisiae kre1, complements killer toxin sensitivity; caspofungin induced; Spider/rat catheter/flow model biofilm induced; Bcr1-repressed in RPMI a/a biofilms
CR_04710W_A	-0.6601	0.999998		Ortholog(s) have U2-type spliceosomal complex localization
CR_04890W_A	-0.592258	0.999998	LYS5	Phosphopantetheinyl transferase; enzyme of lysine biosynthesis; modifies, and thereby activates, Lys2p alpha-aminoadipate reductase; functional homolog of S. cerevisiae Lys5p
CR_04940W_A	-0.622707	0.999998		Ortholog of C. dubliniensis CD36 : Cd36_30340, C. parapsilosis CDC317 : CPAR2_203900, Candida tenuis NRRL Y-1498 : CANTEDRAFT_113094 and Debaryomyces hansenii CBS767 : DEHA2G22374g
CR_05090C_A	-0.587628	0.999998	HGT9	Putative glucose transporter of the major facilitator superfamily; the C. albicans glucose transporter family comprises 20 members; 12 probable membrane-spanning segments; induced at low (0.2%, compared to 2%) glucose in rich media; intron
CR_07820W_A	-0.946025	0.999998		Protein with monooxygenase domains; flow model biofilm induced
CR_10330W_A	0.620497	0.999998	PGA11	Putative GPI-anchored protein
