# Supplementary material for: The RSC (Remodels the Structure of Chromatin) complex of Candida albicans shows compositional divergence with distinct roles in regulating pathogenic traits
Source: PLoS Genet. 2020 Nov 5;16(11):e1009071. doi: 10.1371/journal.pgen.1009071 (PMC7671503; doi:10.1371/journal.pgen.1009071)
Supplement: S4 Table — (XLSX) [file pgen.1009071.s013.xlsx]

## Sheet: sth1 DIA-MS
Protein ID (Uniprot)	Log2ratio sth1/pTetO-STH1-MYC (+Dox/-Dox)	Qvalue	Systematic gene name	Standard name	Description
Q59KG2	-2.84922	0.000212657	C2_08290C_A	UCF1	Upregulated by cAMP in filamentous growth; induced in high iron, decreased upon yeast-hypha switch; downregulation correlates with clinical fluconazole resistance; Ras1-regulated; Hap43-repressed; flow model biofilm induced
A0A1D8PEE2	-2.43478	0.00440167	C1_08690W_A	C1_08690W_A	Ortholog(s) have role in mitochondrial respiratory chain complex II assembly, tricarboxylic acid cycle and mitochondrial matrix localization
A0A1D8PNU4	-1.90493	0.0114267	C5_03990W_A	MID1	Putative stretch-activated Ca2+ channel of the high affinity calcium uptake system; role in thigmotropism; decreased transcription is observed upon fluphenazine treatment or in an azole-resistant strain with CDR1 and CDR2 overexpression
A0A1D8PSZ0	-1.62697	5.41927e-05	CR_05340C_A	IFE2	Putative alcohol dehydrogenase; yeast-enriched transcript; Efg1-regulated; induced by prostaglandins, Hog1, fluconazole; rat catheter biofilm induced
A0A1D8PFP9	-1.57722	0.0207768	C1_13710C_A	DAD1	Subunit of the Dam1 (DASH) complex, which acts in chromosome segregation by coupling kinetochores to spindle microtubules
Q5A0J9	-1.51569	4.06291e-13	C2_02930C_A	C2_02930C_A	Ortholog of S. cerevisiae Ett1, a nuclear protein that inhibits replication of Brome mosaic virus; early-stage flow model biofilm induced
Q59L25	-1.4712	0.00194676	C3_01170W_A	C3_01170W_A	Ortholog(s) have role in inner mitochondrial membrane organization and integral component of mitochondrial inner membrane localization
A0A1D8PDE2	-1.42356	0.0284864	C1_04740W_A	LPG20	Aldo-keto reductase family protein; similar to aryl alcohol dehydrogenases; osmotic stress-induced, correlates with overexpression of MDR1 in fluconazole-resistant isolate; stationary phase enriched protein
Q5A7Q3	-1.27747	0.0152278	C3_00500C_A	C3_00500C_A	Ortholog(s) have role in mRNA splicing, via spliceosome and Prp19 complex, spliceosomal complex localization
A0A1D8PRP7	-1.27272	0.0164855	CR_00340C_A	CR_00340C_A	Ortholog of C. parapsilosis CDC317 : CPAR2_800380, Candida tenuis NRRL Y-1498 : CANTEDRAFT_114079, Pichia stipitis Pignal : psti_CGOB_00127 and Candida tropicalis MYA-3404 : CTRG_05490
Q5A917	-1.26785	0.0316002	C1_01280C_A	MED22	RNA polymerase II mediator complex subunit
A0A1D8PPF1	-1.22594	0.00389607	C6_00680C_A	C6_00680C_A	Ortholog of C. dubliniensis CD36 : Cd36_60590, C. parapsilosis CDC317 : CPAR2_602880, C. auris B8441 : B9J08_001867 and Candida tenuis NRRL Y-1498 : CANTEDRAFT_115034
A0A1D8PRS1	-1.21789	0.0244189	CR_00690C_A	CR_00690C_A	Ortholog(s) have alpha-1,4-glucosidase activity, role in N-glycan processing, polysaccharide biosynthetic process and endoplasmic reticulum lumen, glucosidase II complex localization
A0A1D8PFE1	-1.16553	0.0133344	C1_12310C_A	CSI2	Putative 66S pre-ribosomal particle component; Hap43-induced; essential for growth; transposon mutation affects filamentous growth; Spider biofilm induced
Q59WJ5	-1.13955	2.57988e-06	C1_11100W_A	C1_11100W_A	Ortholog(s) have acireductone dioxygenase (Ni2+-requiring) activity and role in L-methionine salvage from methylthioadenosine
A0A1D8PTX6	-1.13365	0.00741752	CR_09110C_A	CR_09110C_A	Putative oxidoreductase; similar to S. cerevisiae Pga3p; possible Kex2p substrate
A0A1D8PPM7	-1.12554	0.000114781	C6_01390W_A	HOC1	Protein with similarity to mannosyltransferases; similar to S. cerevisiae Hoc1p and C. albicans Och1p
Q5A647	-1.1196	0.01217	C4_04440W_A	C4_04440W_A	Ortholog(s) have protein transmembrane transporter activity, role in filamentous growth, posttranslational protein targeting to membrane, translocation and Sec62/Sec63 complex, endoplasmic reticulum membrane localization
A0A1D8PCL9	-1.10229	0.0431707	C1_02060W_A	C1_02060W_A	Predicted plasma membrane protein; gene has intron
A0A1D8PMU5	-1.09915	0.00117386	C5_00130C_A	C5_00130C_A	Ortholog(s) have structural constituent of ribosome activity and mitochondrial large ribosomal subunit localization
A0A1D8PEB8	-1.06289	0.0494975	C1_08350C_A	C1_08350C_A	Ortholog of C. dubliniensis CD36 : Cd36_02630, C. parapsilosis CDC317 : CPAR2_206910, Candida tenuis NRRL Y-1498 : cten_CGOB_00051 and Pichia stipitis Pignal : psti_CGOB_00173
A0A1D8PTD6	-1.03989	0.019226	CR_06980W_A	CR_06980W_A	Putative protein of unknown function; Hap43-induced; repressed by Rim101; Spider biofilm induced
A0A1D8PH08	-0.991479	2.37405e-09	C2_03470C_A	COX6	Putative cytochrome c oxidase; flucytosine induced
Q5AEM8	-0.973023	0.000587728	C3_02500W_A	PAM17	Predicted component of the presequence translocase-associated import motor (PAM complex) involved in protein import into mitochondrial matrix
Q5AD49	-0.970014	0.0448147	C2_01060C_A	C2_01060C_A	Protein with a predicted DnaJ chaperone domain and a CSL-type zinc finger; Spider biofilm induced
Q5AG39	-0.968127	0.000208248	C5_03100C_A	C5_03100C_A	Has domain(s) with predicted RNA 7-methylguanosine cap binding, mRNA binding activity
A0A1D8PMS1	-0.962144	0.00108228	C4_07060W_A	C4_07060W_A	Ortholog(s) have RNA polymerase III activity, role in tRNA transcription by RNA polymerase III and RNA polymerase III complex, nuclear chromatin localization
Q59ZV4	-0.940409	0.0227789	C1_14270W_A	C1_14270W_A	Ortholog(s) have arylformamidase activity and role in NAD biosynthetic process
A0A1D8PPZ9	-0.92375	0.00206611	C6_02800W_A	C6_02800W_A	Ortholog(s) have methionine-R-sulfoxide reductase activity and role in cellular response to oxidative stress
A0A1D8PDW7	-0.90527	0.00794216	C1_06720C_A	C1_06720C_A	Has domain(s) with predicted oxidoreductase activity and role in oxidation-reduction process
A0A1D8PE88	-0.893584	0.00571135	C1_08140W_A	C1_08140W_A	Ortholog(s) have tRNA-specific adenosine deaminase activity, tRNA-specific adenosine-34 deaminase activity, role in tRNA modification, tRNA wobble adenosine to inosine editing and tRNA-specific adenosine-34 deaminase complex localization
Q5A3J5	-0.88976	0.00712373	C1_11920W_A	C1_11920W_A	Ortholog(s) have ATPase activator activity, protein binding, bridging activity and role in late endosome to vacuole transport, late endosome to vacuole transport via multivesicular body sorting pathway
A0A1D8PHI5	-0.888869	0.000319733	C2_05930W_A	COX9	Putative subunit VIIa of cytochrome c oxidase; flucytosine induced
A0A1D8PQ58	-0.888141	0.0200685	C6_03460W_A	C6_03460W_A	Nucleoporin component of central core of the nuclear pore complex; mRNA binds She3
Q59WC0	-0.883051	1.12248e-07	C1_07180W_A	CCS1	Copper chaperone involved in activation and protection of superoxide dismutase Sod1p
Q5A1N1	-0.882803	0.0350425	C5_01070C_A	C5_01070C_A	Protein of unknown function; repressed by fluphenazine treatment; induced by benomyl treatment and in an RHE model; regulated by Nrg1, Tup1
Q5AHZ4	-0.874366	0.0026607	C1_03550C_A	COQ6	Ortholog(s) have oxidoreductase activity, acting on paired donors, with incorporation or reduction of molecular oxygen, reduced flavin or flavoprotein as one donor, and incorporation of one atom of oxygen activity
Q5AJG7	-0.870942	0.00343722	C3_02190C_A	C3_02190C_A	Putative ubiquinone oxidoreductase; repressed by nitric oxide; Hap43p-repressed
A0A1D8PRY9	-0.856226	0.000102541	CR_01490C_A	CR_01490C_A	Protein with a predicted role in protein translocation from the endoplasmic reticulum
Q5AI92	-0.850197	0.00156496	C1_02720W_A	C1_02720W_A	Putative transcription factor with zinc finger DNA-binding motif
Q59N74	-0.827686	0.0485743	C5_03800W_A	C5_03800W_A	Cytochrome c oxidase subunit; membrane-localized protein; rat catheter biofilm induced
A0A1D8PSB8	-0.825741	0.00039197	CR_02930W_A	CR_02930W_A	Protein of unknown function; induced by nitric oxide independent of Yhb1p
A0A1D8PSF2	-0.823989	0.000618097	CR_03200C_A	CR_03200C_A	Ortholog(s) have RNA binding, ribonuclease MRP activity, ribonuclease P activity, tRNA binding activity
Q59ZW9	-0.820615	0.00340077	C1_14150C_A	PAM16	Putative maltase; regulated by Gcn4; repressed by amino acid starvation (3-AT); rat catheter biofilm induced
A0A1D8PQZ0	-0.817817	0.00144067	C7_01850C_A	CRN1	Coronin; cortical actin cytoskeletal component; predicted role in regulation of actin patch assembly; rat catheter and Spider biofilm repressed
A0A1D8PNJ9	-0.799666	8.78816e-05	C5_02810W_A	C5_02810W_A	Ortholog(s) have RNA binding activity, role in mRNA splicing, via spliceosome and U4/U6 x U5 tri-snRNP complex, U6 snRNP, nucleolus, nucleus localization
Q5ADV2	-0.791445	0.000474501	C3_07490W_A	C3_07490W_A	Ortholog(s) have phosphopentomutase activity and role in guanosine catabolic process, inosine catabolic process, purine ribonucleoside salvage
Q5AG55	-0.779961	0.0464715	C5_02990W_A	C5_02990W_A	Has domain(s) with predicted NADH dehydrogenase (ubiquinone) activity, electron transfer activity and membrane localization
A0A1D8PUA8	-0.771636	0.0360944	CR_10690W_A	POP3	Putative RNase MRP and nuclear RNase P component; decreased repressed by prostaglandins; Spider biofilm induced
A0A1D8PNB1	-0.768533	2.25197e-06	C5_01890W_A	C5_01890W_A	Protein with a role in insertion of tail-anchored proteins into the ER membrane; required for efficient mating, in shmoo formation and nuclear migration in the pre-zygote of S. cerevisiae; Hap43-repressed
Q5APF5	-0.761745	0.015341	C1_09470C_A	C1_09470C_A	Putative tricarboxylate carrier family protein; localized to the mitochondrial membrane
Q5AJF1	-0.734025	2.63777e-06	C3_02040C_A	C3_02040C_A	Ortholog of S. cerevisiae Loc1, a nuclear protein involved in asymmetric localization of ASH1 mRNA in S. cerevisiae; Hap43-induced gene; Spider biofilm induced
A0A1D8PQT6	-0.724314	0.0333234	C7_01320W_A	C7_01320W_A	Putative ethanolamine kinase
A0A1D8PM44	-0.716714	0.0196568	C4_04720W_A	C4_04720W_A	Ortholog(s) have methylenetetrahydrofolate dehydrogenase (NAD+) activity, role in folic acid-containing compound biosynthetic process, one-carbon metabolic process, purine nucleobase biosynthetic process and cytosol localization
Q5A9X0	-0.714996	0.000601114	C3_01120W_A	C3_01120W_A	Predicted methyltransferase; rat catheter biofilm induced
A0A1D8PQ44	-0.714001	0.00508816	C6_03210C_A	C6_03210C_A	RNA polymerase III subunit; Spider biofilm induced
A0A1D8PSP5	-0.709879	8.61553e-05	CR_04110W_A	CR_04110W_A	Putative RNA-binding protein; role in assembly of box H/ACA snoRNPs and thus pre-rRNA processing; Spider biofilm induced
Q5A222	-0.706624	9.58192e-09	CR_02620C_A	CR_02620C_A	Protein of unknown function; Hap43-repressed gene; repressed by nitric oxide
A0A1D8PLD7	-0.700915	2.06074e-07	C4_01840C_A	C4_01840C_A	Putative dienelactone hydrolase; protein abundance is affected by URA3 expression in the CAI-4 strain background; protein present in exponential and stationary growth phase yeast cultures; rat catheter biofilm repressed
Q59RL1	-0.694026	2.86419e-05	C6_00330C_A	GNP1	Similar to asparagine and glutamine permease; fluconazole, caspofungin induced; regulated by Nrg1, Mig1, Tup1, Gcn2, Gcn4, and alkaline regulated by Rim101; repressed during chlamydospore formation; rat catheter, flow model biofilm induced
Q5APB5	-0.692231	0.0210539	C1_09850C_A	C1_09850C_A	Ortholog of S. cerevisiae : CUB1, C. dubliniensis CD36 : Cd36_09270, C. parapsilosis CDC317 : CPAR2_803450, C. auris B8441 : B9J08_002739 and Candida tenuis NRRL Y-1498 : CANTEDRAFT_131760
A0A1D8PDT0	-0.687768	0.0384861	C1_06060C_A	ACP1	Putative mitochondrial acyl carrier protein involved in fatty acid biosynthesis; shows colony morphology-related gene regulation by Ssn6p; protein newly produced during adaptation to the serum
Q5ABB4	-0.683924	0.0157595	C1_00520W_A	C1_00520W_A	Ortholog(s) have phosphatase activity and role in dephosphorylation
A0A1D8PNX1	-0.682756	0.00340116	C5_04350C_A	C5_04350C_A	Ortholog of S. cerevisiae : FSH3, C. glabrata CBS138 : CAGL0L11044g, C. dubliniensis CD36 : Cd36_54010, C. parapsilosis CDC317 : CPAR2_100920 and C. auris B8441 : B9J08_004360
A0A1D8PU93	-0.682692	0.0173393	CR_10700W_A	RFC4	Putative heteropentameric replication factor C subunit; flucytosine induced; periodic mRNA expression, peak at cell-cycle G1/S phase
A0A1D8PSP7	-0.682458	0.00504203	CR_04260W_A	SNP3	Putative U6 snRNA-associated protein; transcript regulated by Mig1
A0A1D8PLY1	-0.681023	0.0319118	C4_03840C_A	RRP42	Putative exosome non-catalytic core component; involved in 3'-5' RNA processing; rat catheter biofilm induced
Q5A7M9	-0.674243	0.000636162	C3_00320W_A	RHR2	Glycerol 3-phosphatase; roles in osmotic tolerance, glycerol accumulation in response to salt; Spider/flow model biofilm induced; regulated by macrophage, stress, yeast-hyphal switch, pheromone, Gcn4, Hog1, Nrg1, Tup1
Q5AMR4	-0.672636	0.0115379	C4_02090C_A	C4_02090C_A	Ortholog(s) have role in U1 snRNA 3'-end processing, U4 snRNA 3'-end processing and U5 snRNA 3'-end processing, more
Q5ABA9	-0.672528	0.0251666	C1_00470C_A	C1_00470C_A	Ortholog(s) have role in N-acylethanolamine metabolic process, N-acylphosphatidylethanolamine metabolic process and integral component of mitochondrial inner membrane localization
A0A1D8PH93	-0.670716	0.00408078	C2_04490W_A	C2_04490W_A	Similar to HMG-box variant of S. pombe; Spider biofilm repressed
Q5ALX8	-0.669369	2.3593e-10	C2_01430W_A	APT1	Adenine phosphoribosyltransferase; flucytosine induced; repressed by nitric oxide; protein level decreased in stationary phase yeast cultures
Q5A217	-0.668674	0.0267774	CR_02670C_A	CR_02670C_A	Ortholog of C. dubliniensis CD36 : Cd36_27680, C. parapsilosis CDC317 : CPAR2_801140, C. auris B8441 : B9J08_004087 and Candida tenuis NRRL Y-1498 : CANTEDRAFT_129982
A0A1D8PDB1	-0.667825	1.63175e-06	C1_04490W_A	C1_04490W_A	Ortholog(s) have role in CENP-A containing nucleosome assembly, chromatin maintenance and nucleoplasm localization
A0A1D8PMU3	-0.666993	0.0130155	C5_00160W_A	C5_00160W_A	Ortholog of C. dubliniensis CD36 : Cd36_50190, C. parapsilosis CDC317 : CPAR2_302680, C. auris B8441 : B9J08_004528 and Candida tenuis NRRL Y-1498 : CANTEDRAFT_109949
A0A1D8PS00	-0.66333	0.00582216	CR_01550C_A	CR_01550C_A	Ortholog(s) have 3'-5'-exodeoxyribonuclease activity, endonuclease activity and role in apoptotic DNA fragmentation, cellular response to oxidative stress
A0A1D8PRH3	-0.657392	7.46137e-06	C7_03960C_A	UME1	Ortholog of C. dubliniensis CD36 : Cd36_73630, C. parapsilosis CDC317 : CPAR2_805330, C. auris B8441 : B9J08_000281 and Candida tenuis NRRL Y-1498 : CANTEDRAFT_119330
Q5AJY5	-0.655193	3.27266e-06	C5_05390C_A	PGA4	GPI-anchored cell surface protein; beta-1,3-glucanosyltransferase with similarity to the A. fumigatus GEL family; transcript induced in RHE model of oral candidiasis; fluconazol-induced
A0A1D8PIN8	-0.654156	0.000358828	C2_10270W_A	PUS7	Pseudouridine synthase; catalyzes pseudouridylation in U2 snRNA, 5S rRNA, cytoplasmic tRNAs and in pre-tRNA(Tyr); F-12/CO2 early biofilm induced
A0A1D8PE13	-0.654003	0.0310256	C1_07340W_A	C1_07340W_A	Ortholog(s) have ATPase activity, DNA binding, nucleosome binding, rDNA binding, transcription regulatory region DNA binding activity
P0CU37	-0.650193	8.68618e-06	C5_03700C_A	C5_03700C_A	Ortholog(s) have diphthine synthase activity and role in peptidyl-diphthamide biosynthetic process from peptidyl-histidine
A0A1D8PF30	-0.645899	3.82986e-05	C1_11110C_A	C1_11110C_A	Ortholog(s) have tubulin binding activity, role in tubulin complex assembly and cytoplasm, prefoldin complex localization
P0C8K9	-0.645519	0.0208948	CM_00210W	COX1	Subunit I of cytochrome c oxidase, which is the terminal member of the mitochondrial (mt) inner membrane electron transport chain; one of three mt-encoded subunits; alternatively spliced transcripts encode 4 putative splicing endonucleases
A0A1D8PT39	-0.643743	0.00435188	CR_05890C_A	CR_05890C_A	Ortholog(s) have acetyltransferase activator activity, histone binding activity
Q59MW2	-0.641594	0.0279055	CR_07750C_A	CR_07750C_A	Ortholog(s) have role in maturation of 5.8S rRNA from tricistronic rRNA transcript (SSU-rRNA, 5.8S rRNA, LSU-rRNA), maturation of LSU-rRNA from tricistronic rRNA transcript (SSU-rRNA, 5.8S rRNA, LSU-rRNA)
A0A1D8PRF5	-0.63987	2.64969e-06	C7_03810W_A	SLA2	Actin binding protein with roles in growth control and morphogenesis; required for alkaline pH-induced hyphal formation; localized to actin patches; rat catheter biofilm repressed
Q59NB3	-0.63958	0.00325947	C1_10530W_A	SNL1	Ribosome-associated protein predicted to function in protein synthesis; 1 predicted transmembrane domain; rat catheter biofilm repressed
A0A1D8PGT0	-0.634442	4.67535e-07	C2_03130W_A	C2_03130W_A	Ortholog(s) have protein-arginine omega-N monomethyltransferase activity and role in peptidyl-arginine methylation
A0A1D8PU62	-0.628625	2.93844e-07	CR_10280W_A	CR_10280W_A	Protein with a predicted role in cytochrome c oxidase assembly; rat catheter biofilm induced
Q59WT3	-0.62543	0.0217272	C6_01110W_A	FAD2	Delta-12 fatty acid desaturase, involved in production of linoleic acid, which is a major component of membranes
Q59RQ4	-0.623575	0.0063277	CR_07390C_A	MRPL8	Mitochondrial 60S ribosomal protein subunit; Hap43p-repressed gene
Q5A653	-0.618623	7.07236e-05	C4_04500C_A	C4_04500C_A	Ortholog(s) have protein-lysine N-methyltransferase activity and role in peptidyl-lysine trimethylation
Q5A923	-0.618074	0.00128323	C1_01240W_A	IFD3	Putative aldo/keto reductase; Mig1-regulated
Q5A359	-0.615347	1.05137e-06	CR_08370W_A	GSH2	Putative glutathione synthase; induced in high iron; heavy metal (cadmium) stress-induced
A0A1D8PUA7	-0.60967	0.0388618	CR_10740W_A	CSM1	Putative component of the monopolin complex with role in rDNA silencing, homologous chromosome segregation, protein localization to nucleolar rDNA repeats
Q59VR1	-0.609538	0.00288817	C1_03770W_A	SKO1	bZIP transcription factor; involved in cell wall damage response; represses the yeast-to-hypha transition; mutants are caspofungin sensitive; induced by osmotic stress via Hog1; induced by Mnl1 under weak acid stress
Q59MV9	-0.607492	5.72336e-12	CR_07790C_A	YHB1	Nitric oxide dioxygenase; acts in nitric oxide scavenging/detoxification; role in virulence in mouse; transcript activated by NO, macrophage interaction; Hap43, hypha repressed; mRNA binds She3
A0A1D8PD81	-0.606018	2.88009e-07	C1_04030W_A	C1_04030W_A	Ortholog(s) have aspartate-tRNA ligase activity, role in mitochondrial aspartyl-tRNA aminoacylation and mitochondrion localization
A0A1D8PGB7	-0.605894	1.23855e-09	C2_01390W_A	C2_01390W_A	Ortholog(s) have phosphatidylinositol-4,5-bisphosphate binding activity, role in actin cortical patch assembly, actin filament organization, endocytosis and actin cortical patch localization
Q59MA9	-0.600252	4.37174e-14	C1_04970W_A	C1_04970W_A	Ortholog(s) have RNA binding activity and cytoplasmic stress granule localization
P87163	-0.598053	0.00176506	C1_08600C_A	GCD6	Ortholog of S. cerevisiae Gcd6; catalytic epsilon subunit of the translation initiation factor eIF2B; genes encoding translation factors are repressed by phagocytosis by murine macrophages
Q5APC1	-0.596399	0.00200421	C1_09790C_A	C1_09790C_A	Ortholog(s) have 3'-5' RNA helicase activity, RNA binding, polynucleotide adenylyltransferase activity, protein binding, bridging activity
Q5ADP6	-0.594141	0.00301332	C3_07050W_A	C3_07050W_A	Ortholog(s) have enzyme activator activity
A0A1D8PEN6	-0.593197	0.0121971	C1_09260C_A	PTC1	Putative protein phosphatase of the Type 2C-related family (serine/threonine-specific), similar to S. cerevisiae Ptc1p; mutant shows virulence defect
Q5A9Z7	-0.59314	0.0361452	C1_05650W_A	C1_05650W_A	Protein with a predicted phosphoribulokinase/uridine kinase domain; Spider biofilm induced
Q59P43	-0.590873	3.94876e-05	C2_06310C_A	GSP1	Small RAN G-protein; essential; no prenylation predicted; can rescue S. cerevisiae gsp1 viability; macrophage/pseudohyphal-induced; transcript not regulated by white-opaque, yeast-hypha switching; GlcNAc-induced; Spider biofilm repressed
A0A1D8PT04	-0.587783	0.00127518	CR_05480W_A	CR_05480W_A	Ortholog(s) have dicarboxylic acid transmembrane transporter activity, role in mitochondrial transport and mitochondrial inner membrane, mitochondrion localization
A0A1D8PSE0	-0.582928	3.99243e-09	CR_03120W_A	CR_03120W_A	Ortholog of S. cerevisiae Mpm1; a mitochondrial intermembrane space protein of unknown function; Hap43-repressed; Spider biofilm induced
A0A1D8PHH0	-0.576417	0.0382928	C2_05520W_A	C2_05520W_A	Ortholog(s) have protein-lysine N-methyltransferase activity and role in peptidyl-lysine dimethylation, peptidyl-lysine monomethylation, vesicle-mediated transport
A0A1D8PJF5	-0.576139	0.0355399	C3_02370C_A	ALR1	Putative transporter of divalent cations; hyphal-induced expression; rat catheter biofilm induced
A0A1D8PQJ7	-0.576119	0.00166974	C7_00340C_A	C7_00340C_A	Ortholog(s) have nuclear import signal receptor activity, role in protein import into nucleus and cytoplasm, nucleus localization
A0A1D8PJK2	-0.57561	0.000227621	C3_03010C_A	DTD2	Ortholog(s) have D-leucyl-tRNA(Leu) deacylase activity, D-tyrosyl-tRNA(Tyr) deacylase activity and role in D-leucine catabolic process, D-tyrosine catabolic process, tRNA metabolic process
Q5ANC6	-0.574374	0.0255629	C3_05070W_A	CEM1	Protein similar to S. cerevisiae Cem1p, an acyl carrier protein involved in fatty acid biosynthesis; likely to be essential for growth, based on an insertional mutagenesis strategy
A0A1D8PJL8	-0.573588	0.000547509	C3_03180C_A	PNP1	Purine nucleoside phosphorylase; metabolizes inosine and guanosine nucleosides; in the nicotinamide riboside salvage pathway; Spider biofilm repressed
A0A1D8PTH5	-0.56957	4.8741e-06	CR_07340C_A	CR_07340C_A	Ortholog of C. dubliniensis CD36 : Cd36_32970, C. parapsilosis CDC317 : CPAR2_701710, C. auris B8441 : B9J08_000571 and Candida tenuis NRRL Y-1498 : CANTEDRAFT_106599
A0A1D8PG46	-0.56896	0.000386487	C2_00600C_A	C2_00600C_A	Protein with a predicted role in mitochondrial iron metabolism; Hap43-repressed; expression upregulated during growth in the mouse cecum; Spider biofilm induced
Q59NH3	-0.568487	0.0433967	C6_00600C_A	YHM2	Predicted carrier protein; exports citrate from and imports oxoglutarate into the mitochondrion; alkaline induced; Spider biofilm repressed
Q5AMR0	-0.568127	0.00245447	C4_02050W_A	HGH1	Putative HMG1/2-related protein; transcript regulated by Mig1
A0A1D8PMF7	-0.567908	0.0108838	C4_05850C_A	C4_05850C_A	Protein of unknown function; may play a role in regulation of cell size; rat catheter biofilm repressed
Q59U54	-0.566547	0.000306169	C2_07370W_A	C2_07370W_A	Ortholog of C. dubliniensis CD36 : Cd36_21640, C. parapsilosis CDC317 : CPAR2_105040, Candida tenuis NRRL Y-1498 : CANTEDRAFT_112352 and Debaryomyces hansenii CBS767 : DEHA2C08008g
Q5A6Q4	-0.561	3.49166e-05	CR_04160C_A	CR_04160C_A	Ortholog(s) have tRNA (adenine-N1-)-methyltransferase activity, role in tRNA methylation and nucleus, tRNA (m1A) methyltransferase complex localization
Q5A3L6	-0.556297	0.0327127	C1_12110C_A	C1_12110C_A	Protein of unknown function; repressed by nitric oxide
Q5ALU6	-0.556129	2.57294e-05	C2_01690W_A	C2_01690W_A	Putative succinate dehydrogenase; enzyme of citric acid cycle; repressed by nitric oxide; Efg1, Hap43 repressed
Q59S77	-0.55305	0.0130191	C6_02230W_A	C6_02230W_A	Putative GTPase; role in 60S ribosomal subunit biogenesis; Spider biofilm induced
A0A1D8PLQ3	-0.55275	0.0487401	C4_03050C_A	C4_03050C_A	Ortholog(s) have carboxypeptidase activity, role in nitrogen compound metabolic process, proteolysis involved in cellular protein catabolic process and fungal-type vacuole lumen localization
Q59Z54	-0.55247	3.25746e-05	C2_06920C_A	C2_06920C_A	Ortholog of S. cerevisiae : YPL199C, C. glabrata CBS138 : CAGL0G09108g, C. dubliniensis CD36 : Cd36_21210, C. parapsilosis CDC317 : CPAR2_406880 and C. auris B8441 : B9J08_004580
Q5A1B0	-0.550678	0.0015569	C4_06270C_A	ERG26	C-3 sterol dehydrogenase, catalyzes the 2nd of 3 steps required to remove 2 C-4 methyl groups from an intermediate in ergosterol biosynthesis; amphotericin B, caspofungin repressed; Spider biofilm repressed
Q5A2K0	-0.54998	0.00240285	C2_07740W_A	C2_07740W_A	Ortholog(s) have role in response to salt stress
A0A1D8PRI0	-0.54436	1.26041e-07	C7_04040C_A	NPT1	Putative nicotinate phosphoribosyltransferase, involved in NAD salvage pathway; fungal-specific (no human or murine homolog)
Q5AK00	-0.544249	8.03469e-09	C5_05270C_A	C5_05270C_A	Ortholog of C. dubliniensis CD36 : Cd36_54870, C. parapsilosis CDC317 : CPAR2_100250, Debaryomyces hansenii CBS767 : DEHA2D13992g and Pichia stipitis Pignal : PICST_40400
A0A1D8PTG5	-0.53983	0.000720065	CR_07330W_A	SMX4	Component of heteroheptameric complexes (Lsm1p, Lsm8p) involved in RNA processing and decay; flucytosine induced
Q59WH7	-0.536381	2.76518e-05	C1_10930C_A	UBA4	Putative ubiquitin activating protein; Hap43-repressed; induced by prostaglandins; clade-associated gene expression
Q5APF2	-0.534117	1.34384e-12	C1_09490C_A	GUA1	Putative GMP synthase, involved in the final step of guanine biosynthesis; soluble protein in hyphae; flucytosine induced; macrophage-downregulated protein abundance; protein level decreases in stationary phase cultures
A0A1D8PCL4	-0.533342	4.4002e-11	C1_01910W_A	C1_01910W_A	Protein of unknown function; present in exponential and stationary growth phase yeast cultures
Q59WU2	-0.531419	7.57809e-07	C6_01050W_A	C6_01050W_A	Probable mitochondrial tyrosyl-tRNA synthetase, based on conservation in other fungi
Q5A199	-0.529585	0.0313147	C4_06170C_A	C4_06170C_A	Ortholog(s) have role in ribosome biogenesis and cytosol localization
Q5ABB3	-0.525529	0.0304705	C1_00510W_A	C1_00510W_A	Ortholog(s) have 3-methyl-2-oxobutanoate hydroxymethyltransferase activity, role in pantothenate biosynthetic process and mitochondrion localization
A0A1D8PGS5	-0.521703	0.00484075	C2_03080W_A	IDH2	Putative mitochondrial NAD-isocitrate dehydrogenase subunit; induced by ciclopirox; induced in high iron; present in exponential and stationary growth phases; Spider biofilm repressed
A0A1D8PS88	-0.518975	0.0430223	CR_02550C_A	CR_02550C_A	Ortholog(s) have role in U4 snRNA 3'-end processing, exonucleolytic trimming to generate mature 3'-end of 5.8S rRNA from tricistronic rRNA transcript (SSU-rRNA, 5.8S rRNA and LSU-rRNA), more
Q5A0H3	-0.517369	7.63184e-06	C2_02690W_A	SER2	Ortholog(s) have phosphoserine phosphatase activity and role in L-serine biosynthetic process
Q59X38	-0.514741	3.18911e-07	C2_09320C_A	PES1	Pescadillo homolog required for dispersal of biofilm cells into planktonic yeast cells; essential in yeast cells, not in hyphal cells; mutation confers hypersensitivity to 5-fluorocytosine, 5-fluorouracil, tubercidin
Q5A513	-0.514462	0.0333258	C5_00560W_A	C5_00560W_A	Ortholog(s) have ubiquitin conjugating enzyme activity, ubiquitin protein ligase activity, ubiquitin-protein transferase activity
Q59QT3	-0.513118	0.00326706	C5_03390C_A	FUR1	Uracil phosphoribosyltransferase; predicted tetrameric enzyme of pyrimidine salvage; mutations associated with flucytosine resistance in clade I clinical isolates; flucytosine, macrophage-induced protein; levels decrease in stationary phase
A0A1D8PKU3	-0.512642	0.00979533	C3_07580W_A	C3_07580W_A	Ortholog of C. dubliniensis CD36 : Cd36_87460, C. parapsilosis CDC317 : CPAR2_808260, C. auris B8441 : B9J08_001750 and Debaryomyces hansenii CBS767 : DEHA2F07084g
Q5A327	-0.511574	0.000804723	CR_08620C_A	CR_08620C_A	Ortholog of C. dubliniensis CD36 : Cd36_34210, C. parapsilosis CDC317 : CPAR2_205590, C. auris B8441 : B9J08_004911 and Candida tenuis NRRL Y-1498 : cten_CGOB_00133
A0A1D8PQL4	-0.508307	0.0478176	C7_00330C_A	C7_00330C_A	Ortholog(s) have N(6)-L-threonylcarbamoyladenine synthase activity, single-stranded telomeric DNA binding activity
A0A1D8PQW6	-0.507762	6.22111e-05	C7_01650W_A	C7_01650W_A	RNA polymerase III transcription initiation factor complex (TFIIIC) subunit; growth phase regulated protein; downregulaated in stationary phase yeast cultures; Hap43-repressed; flow model biofilm induced; Spider biofilm repressed
Q5A330	-0.506905	2.01765e-09	CR_08600C_A	PEX19	Ortholog(s) have peroxisome membrane targeting sequence binding activity
O13426	-0.504681	2.68127e-16	C6_03760C_A	SHM2	Cytoplasmic serine hydroxymethyltransferase; complements glycine auxotrophy of S. cerevisiae shm1 shm2 gly1-1 mutant; antigenic; farnesol-upregulated in biofilm; stationary-phase enriched protein; rat catheter and Spider biofilm repressed
Q59ZI9	-0.503907	0.00899322	C2_04980C_A	CKA2	Catalytic alpha-subunit of protein kinase CK2; interaction with calcineurin pathway affects fluconazole sensitivity; synthetically lethal with CKA1; attenuated virulence in a mouse oropharyngeal candidiasis but not in a systemic mouse model
Q5AJS6	-0.50357	1.72834e-05	C3_02020W_A	C3_02020W_A	Ortholog(s) have rRNA primary transcript binding activity
Q5A301	-0.503226	4.59901e-11	C3_06230W_A	CYM1	Putative metalloprotease of the mitochondrial intermembrane space; rat catheter biofilm induced
Q59T30	-0.503213	0.000449803	C2_05760C_A	C2_05760C_A	Predicted ORF from Assembly 19; repressed by nitric oxide; removed from Assembly 20; subsequently reinstated in Assembly 21 based on comparative genome analysis
A0A1D8PSQ6	-0.502315	0.0290726	CR_04390C_A	CR_04390C_A	Ortholog of C. dubliniensis CD36 : Cd36_29750, C. parapsilosis CDC317 : CPAR2_205260, C. auris B8441 : B9J08_005543 and Candida tenuis NRRL Y-1498 : CANTEDRAFT_91782
Q5AFB9	-0.501653	0.0043651	C4_03030C_A	NAN1	Putative U3 snoRNP protein; Hap43p-induced gene; physically interacts with TAP-tagged Nop1p
Q59WF4	-0.501536	0.0176981	C1_10720C_A	MNN2	Alpha-1,2-mannosyltransferase; similar to S. cerevisiae Mnn2; role in cell wall integrity, temperature sensitivity; iron utilization in low iron; Tn mutation affects filamentous growth; filament induced; increased chitin exposes beta-glucan
Q5AGW9	-0.500826	0.00897659	C7_01570C_A	C7_01570C_A	Predicted transmembrane transporter; induced during chlamydospore formation in both C. albicans and C. dubliniensis
A0A1D8PRM7	-0.500235	1.88453e-06	CR_00200W_A	PCK1	Phosphoenolpyruvate carboxykinase; glucose, C-source, yeast-hypha, Hap43 regulated; fluconazole, phagocytosis, H2O2, oral candidasis, Spider/rat catheter/flow model biofilm induced; repressed in biofilm by Bcr1, Tec1, Ndt80, Rob1, Brg1
A0A1D8PQQ9	-0.498471	9.85377e-05	C7_00950W_A	YML6	Putative mitochondrial ribosomal protein; induced upon adherence to polystyrene
Q5AB80	-0.492582	4.64605e-08	C1_00140W_A	KEL1	Kelch repeat domain-containing protein; localizes to sites of polarized growth; mutant colonies exhibit slightly decreased filamentation ratio; not required for buccal epithelial cell adherence or virulence in mice
Q5ACZ2	-0.492428	0.015705	C2_00520W_A	DFG5	N-linked mannoprotein of cell wall and membrane; possible signal transducer; role in hyphal growth and HWP1 induction in alkaline pH; GPI modification predicted; dfg5 dcw1 double mutant is inviable; caspofungin-induced, fungal-specific
A0A1D8PDX5	-0.49015	0.0276357	C1_06900C_A	MMD1	Mitochondrial protein; possibly required for transamination of isoleucine; macrophage-downregulated protein abundance; rat catheter and Spider biofilm repressed
Q5AHY8	-0.489457	1.02428e-05	C1_03650C_A	MRPL27	Putative 60S ribosomal protein L27, mitochondrial precursor
Q5A692	-0.488479	4.92399e-06	C4_04810C_A	C4_04810C_A	Ortholog(s) have tRNA (guanine-N7-)-methyltransferase activity, role in tRNA (guanine-N7)-methylation and tRNA (m7G46) methyltransferase complex localization
A0A1D8PGD2	-0.487937	0.00178865	C2_01340W_A	C2_01340W_A	Has domain(s) with predicted integral component of membrane localization
A0A1D8PSG5	-0.485261	0.0056424	CR_03400W_A	CR_03400W_A	Protein similar to isoleucyl-tRNA synthetase; isoleucyl-tRNA synthetase is the target of drugs including the cyclic beta-amino acid icofungipen/PLD-118/BAY-10-8888 and mupirocin
Q5A942	-0.485259	0.00186323	C1_01040W_A	C1_01040W_A	Ortholog(s) have peptide-methionine (R)-S-oxide reductase activity, role in cellular response to oxidative stress and mitochondrion localization
A0A1D8PRP9	-0.484326	0.000771784	CR_00480W_A	MRPL6	Putative mitochondrial ribosomal protein
Q5A784	-0.480968	0.00176679	C1_08060W_A	OFR1	Protein involved in regulation of white-opaque switching; Hap43-repressed gene; rat catheter biofilm repressed
A0A1D8PEF0	-0.480134	0.0454488	C1_08880W_A	HEM14	Putative protoporphyrinogen oxidase; involved in heme biosynthesis; predicted Kex2p substrate; iron regulated transcript; Yfh1-induced; Hap43-repressed; rat catheter biofilm repressed
Q5AHG8	-0.47463	5.1284e-07	C2_03950W_A	C2_03950W_A	Putative ribosomal protein, large subunit, mitochondrial precursor; repressed by prostaglandins; Spider biofilm repressed
A0A1D8PS34	-0.473954	0.0373476	CR_01950W_A	CR_01950W_A	Ortholog(s) have RNA polymerase I activity and role in nucleolar large rRNA transcription by RNA polymerase I, transcription by RNA polymerase I, transcription initiation from RNA polymerase I promoter
Q5A6K5	-0.471655	0.0207873	CR_04580W_A	CR_04580W_A	Ortholog(s) have structural constituent of ribosome activity and mitochondrial large ribosomal subunit localization
A0A1D8PG81	-0.471363	0.00404414	C2_01000W_A	HGT7	Putative MFS glucose transporter; glucose, fluconazole, Snf3 induced, expressed at high glucose; 20 member C. albicans glucose transporter family; 12 TM regions predicted; flow model biofilm induced; Spider biofilm repressed
A0A1D8PFD4	-0.471088	5.83639e-05	C1_12320C_A	ATP19	Subunit k of the mitochondrial F1F0 ATP synthase; a large enzyme complex required for ATP synthesis; Spider biofilm repressed
Q5AKW8	-0.469836	0.000116857	C1_13720W_A	C1_13720W_A	Ortholog of S. cerevisiae : KEL3, C. glabrata CBS138 : CAGL0A01067g, C. dubliniensis CD36 : Cd36_12710, C. parapsilosis CDC317 : CPAR2_201590 and C. auris B8441 : B9J08_002506
Q5AJD9	-0.469302	8.12121e-13	C3_01960C_A	POX1-3	Predicted acyl-CoA oxidase; farnesol regulated; stationary phase enriched protein; Spider biofilm induced
A0A1D8PHF7	-0.468442	0.0281343	C2_05620W_A	KTI11	Zn-ribbon protein; required for synthesis of diphthamide on translation factor eEF2; involved in modification of wobble nucleosides in tRNAs; rat catheter and Spider biofilm induced
Q5A5E0	-0.467245	0.041154	C7_03130C_A	DFR1	Trimethoprim resistant dihydrofolate reductase (DHFR), reduces 7,8-dihydrofolate to 5,4,7,8-tetrahydrofolate; binds NADPH; target of drugs that selectively inhibit the fungal enzyme rather than the human enzyme
A0A1D8PND6	-0.467236	0.0035782	C5_01940W_A	C5_01940W_A	Ortholog(s) have 2,5-diamino-6-ribitylamino-4(3H)-pyrimidinone 5'-phosphate deaminase activity, pseudouridine synthase activity and role in riboflavin biosynthetic process, tRNA pseudouridine synthesis
Q59TV7	-0.466615	0.000277752	C1_11790W_A	C1_11790W_A	Thymidylate kinase of unknown role; forms a dimer; potential target for antifungal drugs
A0A1D8PU27	-0.465322	8.55912e-05	CR_09800C_A	CR_09800C_A	Putative U3-containing small subunit processome complex protein; Hap43-induced gene; repressed in core stress response; Spider biofilm induced
A0A1D8PRI7	-0.46503	0.0203996	C7_03980W_A	C7_03980W_A	Ortholog(s) have ER membrane protein complex localization
Q9P975	-0.463501	0.000285904	CR_10490W_A	EIF4E	Translation initiation factor eIF4E; genes encoding ribosomal subunits, translation factors, tRNA synthetases downregulated by phagocytosis by macrophage; alternatively spliced intron in 5' UTR; protein levels decrease in stationary phase
A0A1D8PR21	-0.462783	0.0361801	C7_02110W_A	C7_02110W_A	Ortholog(s) have role in histone deacetylation, negative regulation of antisense RNA transcription and positive regulation of transcription by RNA polymerase II, more
Q59ZG6	-0.456099	0.00681024	C2_05230C_A	RPF2	Putative pre-rRNA processing protein; Hap43p-induced gene; mutation confers hypersensitivity to 5-fluorocytosine (5-FC), 5-fluorouracil (5-FU), and tubercidin (7-deazaadenosine)
A0A1D8PCJ1	-0.454528	1.20083e-06	C1_01600W_A	MRP20	Component of mitochondrial ribosome; decreased expression in hyphae compared to yeast-form cells
A0A1D8PJ73	-0.453715	5.3503e-08	C3_01410C_A	ALI1	Putative NADH-ubiquinone oxidoreductase; in detergent-resistant membrane fraction (possible lipid raft component); predicted N-terminal acetylation; nitric oxide-repressed; plasma membrane-localized; protein decreases in stationary phase
Q59MI8	-0.452666	0.00582216	C3_07890W_A	TIM8	Predicted mitochondrial intermembrane space protein with role in protein import into mitochondrial inner membrane and cytosol
A0A1D8PQC4	-0.451722	0.0367475	C6_04180W_A	C6_04180W_A	Putative metalloprotease; associates with ribosomes and is involved in ribosome biogenesis; Spider biofilm induced
A0A1D8PME3	-0.448779	0.000343649	C4_05780C_A	CFL2	Oxidoreductase; iron utilization; Sfu1/Sef1/Hap43/Nrg1/Tup1/Rim101 regulated; alkaline/low iron/fluphenazine/ciclopirox olamine, flucytosine, fluconazole, Spider/flow model/rat catheter biofilm induced; caspofungin/amphotericin B repressed
A0A1D8PNG1	-0.447456	0.0247282	C5_02410C_A	C5_02410C_A	Ortholog of C. dubliniensis CD36 : Cd36_52200, C. parapsilosis CDC317 : CPAR2_502480, C. auris B8441 : B9J08_004350 and Candida tenuis NRRL Y-1498 : CANTEDRAFT_115972
Q59PW1	-0.445777	0.0162641	C1_07630W_A	C1_07630W_A	Ortholog(s) have 2 iron, 2 sulfur cluster binding, disulfide oxidoreductase activity, glutathione disulfide oxidoreductase activity
A0A1D8PDK0	-0.445372	0.00885993	C1_05390C_A	C1_05390C_A	Ortholog of C. dubliniensis CD36 : Cd36_05120, C. parapsilosis CDC317 : CPAR2_107740, C. auris B8441 : B9J08_004520 and Candida tenuis NRRL Y-1498 : CANTEDRAFT_136277
A0A1D8PRP6	-0.44343	0.00516877	CR_00490W_A	CR_00490W_A	Putative mitochondrial ribosomal protein of the large subunit; Hap43p-repressed gene; ortholog of S. cerevisiae MRPL9
A0A1D8PR39	-0.442561	0.00776858	C7_02390W_A	AHP2	Putative thiol-specific peroxiredoxin; macrophage-downregulated gene
A0A1D8PHP8	-0.441471	0.0227363	C2_06680W_A	FRP3	Putative ammonium transporter; upregulated in the presence of human neutrophils; fluconazole-downregulated; repressed by nitric oxide; Spider biofilm induced; rat catheter biofilm repressed
Q9B8C9	-0.439998	0.00846965	CM_00380W	NAD5	Subunit 5 of NADH:ubiquinone oxidoreductase (NADH:ubiquinone dehydrogenase), a multisubunit enzyme complex (complex I) of the mitochondrial inner membrane that catalyzes the first step in mitochondrial respiration
Q59WE9	-0.439544	0.00194587	C1_10690W_A	C1_10690W_A	Ortholog(s) have mitochondrion localization
A0A1D8PHM2	-0.437162	0.00133167	C2_06080C_A	C2_06080C_A	Ortholog(s) have 8-oxo-dGDP phosphatase activity, thiamine diphosphokinase activity and role in thiamine biosynthetic process, thiamine metabolic process
A0A1D8PPL1	-0.436418	0.00139534	C6_01320W_A	TRA1	Subunit of the NuA4 histone acetyltransferase complex
Q5AM80	-0.43603	0.0170914	C2_01860C_A	C2_01860C_A	Ortholog(s) have role in L-methionine salvage from methylthioadenosine and cytosol localization
A0A1D8PD51	-0.435512	0.0329255	C1_03830C_A	C1_03830C_A	Ortholog(s) have role in exonucleolytic trimming to generate mature 3'-end of 5.8S rRNA from tricistronic rRNA transcript (SSU-rRNA, 5.8S rRNA, LSU-rRNA) and mRNA processing, more
A0A1D8PFM0	-0.432884	0.0231669	C1_13190W_A	C1_13190W_A	Mitochondrial membrane protein of unknown function; Spider biofilm induced
A0A1D8PTR4	-0.432479	0.0229637	CR_08480C_A	CR_08480C_A	Ortholog(s) have structural constituent of ribosome activity and cytosolic small ribosomal subunit localization
Q59QT1	-0.429584	0.00167944	C5_03370C_A	C5_03370C_A	Ortholog(s) have myosin II heavy chain binding activity, role in actomyosin contractile ring contraction and cellular bud neck contractile ring, myosin II complex localization
A0A1D8PGS7	-0.428256	8.21784e-06	C2_03090C_A	ADE8	Putative phosphoribosylglycinamide formyl-transferase, enzyme of amino acid biosynthesis pathway; upregulated in biofilm; S. cerevisiae ortholog is Gcn4p regulated; protein enriched in stationary phase yeast-form cultures
A0A1D8PKR9	-0.427297	0.000798544	C3_07430W_A	C3_07430W_A	Ortholog(s) have acid phosphatase activity and role in dephosphorylation, intracellular sterol transport
A0A1D8PMT4	-0.426618	0.0225997	C4_07160W_A	C4_07160W_A	Ortholog of C. dubliniensis CD36 : Cd36_26300, Candida tenuis NRRL Y-1498 : cten_CGOB_00015, Debaryomyces hansenii CBS767 : DEHA2G16104g and Pichia stipitis Pignal : psti_CGOB_00212
A0A1D8PMB7	-0.423967	2.39677e-08	C4_05460C_A	OFD1	Putative prolyl hydroxylase family member; regulates Ume6p stability in response to oxygen; inhibited by hypoxia; repressed by prostaglandins; Spider biofilm induced
Q5AI97	-0.423191	0.0111052	C1_02660C_A	MGM101	Putative mitochondrial genome maintenance protein; fungal-specific (no human or murine homolog); mutation confers hypersensitivity to tubercidin (7-deazaadenosine)
A0A1D8PHV8	-0.422622	0.00667531	C2_07300C_A	RPA12	Putative DNA-directed RNA polymerase I; induced upon adherence to polystyrene
Q59N30	-0.418537	5.8376e-05	C5_01610W_A	C5_01610W_A	Ortholog(s) have pseudouridine synthase activity, role in mRNA pseudouridine synthesis, tRNA pseudouridine synthesis and cytoplasm, nucleus localization
A0A1D8PCI9	-0.417987	2.2199e-05	C1_01450W_A	ABC1	Putative ubiquinol-cytochrome-c reductase; induced upon adherence to polystyrene; flow model biofilm induced; Spider biofilm induced
A0A1D8PR11	-0.417092	0.000254948	C7_02100W_A	C7_02100W_A	Putative curved DNA-binding protein orthologous to S. pombe Cdb4; stationary phase enriched protein; rat catheter and Spider biofilm repressed
A0A1D8PDE8	-0.415608	0.000562428	C1_04890W_A	YBN5	P-loop ATPase with similarity to human OLA1 and bacterial YchF; Spider biofilm repressed
Q5A2A2	-0.415553	0.000433315	C1_05270C_A	C1_05270C_A	Ortholog(s) have DNA binding, recombinase activity, single-stranded DNA binding, structural constituent of ribosome activity
Q5AK30	-0.413609	0.00527755	C5_04990W_A	C5_04990W_A	Ortholog(s) have DNA-directed 5'-3' RNA polymerase activity, RNA polymerase III activity and role in tRNA transcription by RNA polymerase III, transcription initiation from RNA polymerase III promoter
A0A1D8PUB3	-0.413467	0.000464375	CR_10730C_A	CR_10730C_A	Ortholog(s) have RNA polymerase II complex binding activity and role in DNA damage response, detection of DNA damage, mRNA 3'-end processing, negative regulation of transposition, RNA-mediated
A0A1D8PN62	-0.411698	5.32946e-06	C5_01180W_A	PUS4	Putative pseudouridine synthase; transcript regulated by Nrg1, Mig1, and Tup1
Q5A3P1	-0.411625	0.000129442	C1_12350W_A	C1_12350W_A	Ortholog(s) have 3'-5'-exoribonuclease activity, Ran GTPase binding, endoribonuclease activity, exoribonuclease activity, ribonuclease activity, tRNA binding activity
A0A1D8PK30	-0.409816	0.0461572	C3_04960W_A	RPL35	Ribosomal protein; downregulation correlates with clinical development of fluconazole resistance; colony morphology-related gene regulation by Ssn6; Hap43-induced; Spider biofilm repressed
Q5ANA9	-0.409287	0.0245198	C3_05180W_A	RHB1	Putative small G protein from the Ras superfamily involved in cell wall integrity and control of filamentous growth under nitrogen starvation; involved in activation of TOR1C during starvation response
Q5A7N3	-0.409219	0.00314862	C3_00340W_A	C3_00340W_A	Ortholog(s) have protein folding chaperone activity, role in mitochondrial respiratory chain complex III assembly and mitochondrial matrix, mitochondrion localization
Q5AMP9	-0.407551	4.67405e-06	C4_01950W_A	C4_01950W_A	Putative F-actin-capping protein subunit beta; possibly an essential gene, disruptants not obtained by UAU1 method
Q59R27	-0.405422	1.08646e-06	C7_03610C_A	C7_03610C_A	Has domain(s) with predicted metal ion binding activity
Q59RP7	-0.404766	4.21968e-07	CR_07320C_A	CR_07320C_A	Ortholog of S. cerevisiae Mrpl4, a mitochondrial ribosomal protein of the large subunit; repressed by nitric oxide
A0A1D8PJA6	-0.404502	6.60012e-06	C3_01610W_A	C3_01610W_A	Membrane protein; Hap43p-repressed gene; repressed by nitric oxide
Q5ALU1	-0.404403	6.73265e-05	C2_01740C_A	C2_01740C_A	Mitochondrial ribosomal protein of the large subunit; rat catheter biofilm induced
Q5A6S0	-0.403292	9.43444e-05	CR_04010C_A	MRPL40	Putative mitochondrial ribosomal protein; Spider biofilm repressed
Q5A1N7	-0.396555	0.0140855	C5_01110W_A	C5_01110W_A	Ortholog of S. cerevisiae : OTU2, C. dubliniensis CD36 : Cd36_51210, C. parapsilosis CDC317 : CPAR2_303850, C. auris B8441 : B9J08_000423 and Candida tenuis NRRL Y-1498 : CANTEDRAFT_114159
Q5AEI3	-0.396313	2.25904e-05	C3_02920W_A	C3_02920W_A	Ortholog of S. cerevisiae Igo2; role in mRNA stabilization of mRNA; Spider biofilm induced
A0A1D8PU08	-0.394891	0.00107505	CR_09590W_A	CR_09590W_A	Ortholog(s) have role in ubiquinone biosynthetic process, ubiquinone-6 biosynthetic process and mitochondrial inner membrane, mitochondrion localization
Q5ADL9	-0.394883	0.000298522	C3_06800C_A	C3_06800C_A	Ortholog(s) have NEDD8 transferase activity, cullin family protein binding, protein binding, bridging, ubiquitin conjugating enzyme binding, ubiquitin-like protein binding activity
Q5A5N9	-0.39459	0.00408106	C2_10770W_A	RPC11	Putative RNA polymerase III subunit C11; repressed in core caspofungin response; Spider biofilm induced
A0A1D8PP17	-0.394405	0.0113518	C5_04790C_A	C5_04790C_A	Ortholog(s) have role in double-strand break repair via homologous recombination, meiosis I and Smc5-Smc6 complex, nucleus localization
A0A1D8PPR6	-0.393706	0.000560166	C6_01980C_A	C6_01980C_A	Mitochondrial ribosomal protein of the small subunit; S. cerevisiae ortholog is essential for viability; Spider biofilm repressed
A0A1D8PME6	-0.392873	0.0132412	C4_05760W_A	CGT1	mRNA 5' guanylyltransferase; small subunit of mRNA capping enzyme; binds an RNA Pol II C-terminal domain peptide; Cet1p and Cgt1p form a 2:1 complex; functional homolog of S. cerevisiae Ceg1p
A0A1D8PGP5	-0.391584	0.00242416	C2_02620W_A	C2_02620W_A	Putative mitochondrial protein of unknown function; regulated by Sef1p-, Sfu1p-, and Hap43p
A0A1D8PDE3	-0.391445	3.70555e-05	C1_04830W_A	SEC21	Ortholog(s) have role in endoplasmic reticulum to Golgi vesicle-mediated transport, retrograde vesicle-mediated transport, Golgi to endoplasmic reticulum and COPI vesicle coat, endosome localization
Q5AQ62	-0.389211	0.0101385	C1_08870C_A	JIP5	Ortholog of S. cerevisiae Jip5; predicted role in biogenesis of the large ribosomal subunit; repressed in core stress response; Hap43-induced gene
A0A1D8PCU5	-0.384194	0.00213731	C1_02650W_A	C1_02650W_A	Protein of unknown function; Hap43-repressed gene; repressed by nitric oxide
A0A1D8PNA9	-0.38096	3.61029e-06	C5_02010C_A	C5_02010C_A	Ortholog(s) have role in RNA polymerase I assembly, RNA polymerase II core complex assembly, RNA polymerase III assembly, formation of translation preinitiation complex and cytoplasm localization
Q59WW8	-0.37768	0.0183434	C6_00840W_A	GPX2	Similar to glutathione peroxidase; induced in high iron; alkaline induced by Rim101; induced by alpha factor or interaction with macrophage; regulated by Efg1; caspofungin repressed; Spider biofilm induced
Q5A8Y5	-0.376895	0.000960225	C1_01590C_A	C1_01590C_A	Putative RNA polymerase II subunit B150; heterozygous null mutant exhibits resistance to parnafungin in the C. albicans fitness test
Q5AK73	-0.373176	0.00179927	C5_04630W_A	C5_04630W_A	Ortholog(s) have RNA polymerase II complex binding, protein-containing complex binding, rDNA binding, single-stranded RNA binding activity
Q5AEC9	-0.372377	0.000131981	C3_03420C_A	NDE1	Putative NADH dehydrogenase; may act alternatively to complex I in respiration; caspofungin repressed; rat catheter biofilm induced; Spider biofilm repressed
Q59TN1	-0.37019	1.4216e-07	C4_03730C_A	C4_03730C_A	Ortholog(s) have tRNA (guanine-N1-)-methyltransferase activity, role in mitochondrial tRNA methylation, tRNA N1-guanine methylation and cytoplasm, mitochondrial matrix localization
Q5AH60	-0.369341	0.000307489	C7_02340C_A	C7_02340C_A	Ortholog(s) have tRNA (guanine-N7-)-methyltransferase activity, role in tRNA (guanine-N7)-methylation and cytosol, nucleus, tRNA (m7G46) methyltransferase complex localization
A0A1D8PEI2	-0.367882	1.00101e-08	C1_09190C_A	DAK2	Putative dihydroxyacetone kinase; repressed by yeast-hypha switch; fluconazole-induced; caspofungin repressed; protein enriched in stationary phase yeast cultures; flow model biofilm induced; rat catheter and Spider biofilm repressed
A0A1D8PFP3	-0.367371	0.00460832	C1_13420C_A	KEM1	5'->3' exoribonuclease of cytoplasmic stress granules; role in filamentous growth; complements slow growth/mating of S. cerevisiae kem1 mutant; required for SD or Spider medium biofilm formation
A0A1D8PQE5	-0.366416	0.00392839	C6_04360C_A	GLE2	Putative nuclear pore complex; possibly an essential gene, disruptants not obtained by UAU1 method; rat catheter biofilm repressed
A0A1D8PDC7	-0.365965	2.32857e-07	C1_04600C_A	C1_04600C_A	Protein of unknown function; Spider biofilm repressed
Q5AL45	-0.365076	9.49162e-10	C1_13060C_A	C1_13060C_A	Ortholog(s) have role in mitochondrial translation and mitochondrion localization
A0A1D8PPS9	-0.363452	3.38484e-08	C6_02120W_A	CHC1	Clathrin heavy chain; subunit of the major coat protein; role in intracellular protein transport and endocytosis; flow model and rat catheter biofilm repressed
A0A1D8PG18	-0.36211	0.00520049	C2_00170C_A	HMA1	Putative molybdopterin-converting factor; fungal-specific (no human or murine homolog)
Q59YE8	-0.360786	0.00119512	C2_09720W_A	SUP35	Translation factor eRF3; shows prion-like aggregation in some, not all, studies; partially complements S. cerevisiae sup35 mutant translation defect; species barrier with S. cerevisiae Sup35p prion; gene not regulated by yeast-hyphal switch
A0A1D8PFQ0	-0.360014	0.0268745	C1_13550C_A	NUP49	Nuclear pore protein
Q5AH29	-0.358855	0.00814589	C7_02080W_A	C7_02080W_A	Ortholog(s) have glutathione disulfide oxidoreductase activity and cytosol localization
Q59NB8	-0.358777	9.50271e-05	C1_10490W_A	LKH1	Putative leukotriene A(4) hydrolase; repressed during the mating process; Hog1p-induced
A0A1D8PQJ1	-0.358517	0.00322702	C7_00250C_A	C7_00250C_A	Putative cytoplasmic RNA-binding protein; heterozygous null mutant exhibits hypersensitivity to parnafungin and cordycepin in C. albicans fitness test; Spider biofilm repressed
Q5AG73	-0.358499	0.00128763	C5_02820C_A	C5_02820C_A	Ortholog(s) have methylthioribulose 1-phosphate dehydratase activity and role in L-methionine salvage from methylthioadenosine
A0A1D8PLT6	-0.355838	0.00315343	C4_03410W_A	C4_03410W_A	Ortholog(s) have structural constituent of ribosome activity and mitochondrial large ribosomal subunit localization
Q5AMP2	-0.355741	0.00773081	C4_01880W_A	TYR1	Putative prepephenate dehydrogenase; enzyme of tyrosine biosynthesis; fungal-specific (no human or murine homolog)
Q5AD28	-0.35468	1.56172e-06	C2_00850W_A	MSF1	Putative phenylalanine-tRNA ligase; protein level decreases in stationary phase cultures; Hap43p-repressed gene
A0A1D8PJK5	-0.353188	0.000802459	C3_03040W_A	AIP2	Putative actin interacting protein; regulated by Gcn4; induced in response to amino acid starvation (3-AT); repressed by elevated CO2; flow model biofilm repressed
Q5A937	-0.352292	0.0457823	C1_01090C_A	C1_01090C_A	Ortholog(s) have structural constituent of ribosome activity and mitochondrial small ribosomal subunit localization
Q5APD4	-0.351481	1.35136e-07	C1_09680W_A	MTS1	Sphingolipid C9-methyltransferase; catalyzes methylation of the 9th carbon in the long chain base component of glucosylceramides; glucosylceramide biosynthesis is important for virulence; Spider biofilm repressed
Q5A7P6	-0.351458	0.00704631	C3_00450C_A	C3_00450C_A	Ortholog(s) have structural constituent of ribosome activity, role in mitochondrial translation and mitochondrial large ribosomal subunit localization
A0A1D8PJ64	-0.350015	0.0314923	C3_01470W_A	ARF3	Similar to but not orthologous to S. cerevisae Arf3; transcript filament induced; Tup1 regulated; rat catheter biofilm repressed (see Locus History Note for Assembly 19 correction)
A0A1D8PMZ3	-0.349744	0.0238187	C5_00680W_A	RMT2	Minor protein arginine methyltransferases (PRMT) involved in methylation of arginine residues
A0A1D8PG50	-0.348299	0.0221617	C2_00610C_A	ATP18	F1F0 ATP synthase complex subunit; gene has intron
A0A1D8PJW1	-0.348246	0.00869659	C3_03400C_A	VTI1	Ortholog(s) have SNAP receptor activity and role in Golgi to vacuole transport, intra-Golgi vesicle-mediated transport, macroautophagy, vacuole fusion, non-autophagic, vesicle fusion
Q5AQ57	-0.347898	0.00157066	C1_08920W_A	C1_08920W_A	Ortholog(s) have structural constituent of ribosome activity and mitochondrial small ribosomal subunit localization
A0A1D8PHH4	-0.347681	0.024618	C2_05710C_A	C2_05710C_A	Ribosomal 60S subunit protein; Spider biofilm repressed
Q5ANE4	-0.345933	0.0315265	C3_04900W_A	NOP14	Putative nucleolar protein; Hap43-induced; mutation confers resistance to 5-fluorocytosine (5-FC), 5-fluorouracil (5-FU), and tubercidin (7-deazaadenosine); heterozygous mutant is resistant to parnafungin; Spider biofilm induced
Q5AJA5	-0.345503	1.9521e-07	C3_01560W_A	C3_01560W_A	Ortholog of S. cerevisiae Prp43, an RNA helicase in the DEAH-box family that functions in both RNA polymerase I and polymerase II transcript metabolism; Hap43-induced gene
Q5A852	-0.345372	1.09278e-07	CR_00800C_A	PWP2	Putative 90S pre-ribosomal component; repressed in core stress response; repressed by prostaglandins; physically interacts with TAP-tagged Nop1; Hap43-induced
A0A1D8PQF7	-0.345248	0.00013142	C6_04530C_A	C6_04530C_A	Ortholog(s) have tRNA (guanosine-2'-O-)-methyltransferase activity, role in endocytic recycling, tRNA methylation, wobble position ribose methylation and cytoplasm, endosome localization
A0A1D8PKC7	-0.344238	0.0313325	C3_05940C_A	C3_05940C_A	Putative U1A component of the U1 snRNP, involved in splicing; contains two RNA recognition motifs (RRMs); ortholog of S. cerevisiae MUD1
Q5ALN2	-0.344148	0.00671248	C2_02270C_A	C2_02270C_A	Ortholog(s) have structural constituent of ribosome activity and mitochondrial small ribosomal subunit localization
A0A1D8PE77	-0.337036	0.0257815	C1_08020W_A	UBA2	Ortholog(s) have SUMO activating enzyme activity, role in protein sumoylation and SUMO activating enzyme complex, nucleus localization
Q59QD0	-0.336799	0.0120799	C1_08430W_A	CAF16	ABC family protein, predicted not to be a transporter; Hap43, caspofungin repressed; rat catheter and Spider biofilm repressed
A0A1D8PCD2	-0.335513	1.20679e-16	C1_00990C_A	NMA111	Putative serine protease and general molecular chaperone; macrophage-induced gene; repressed in core stress response; merged with orf19.3288.1 in Assembly 21
Q59TN2	-0.334827	0.000322125	C4_03740W_A	C4_03740W_A	Ortholog(s) have role in U4 snRNA 3'-end processing, exonucleolytic trimming to generate mature 3'-end of 5.8S rRNA from tricistronic rRNA transcript (SSU-rRNA, 5.8S rRNA and LSU-rRNA), more
A0A1D8PCP8	-0.334456	0.0131465	C1_02290C_A	C1_02290C_A	Ortholog(s) have protein domain specific binding activity, role in mitochondrial proton-transporting ATP synthase complex assembly and mitochondrion localization
Q5AD78	-0.334169	0.00074644	C2_01360C_A	DCW1	Protein with predicted GPI modification; dfg5 dcw1 double mutant is inviable; not required for wild-type hyphal growth; upregulated in cyr1 mutant (yeast or hyphal form); Hap43-induced
A0A1D8PQ82	-0.333154	1.53351e-05	C6_03640W_A	NOG2	Putative nucleolar GTPase; repressed by prostaglandins; Hap43-induced, rat catheter and Spider biofilm induced
A0A1D8PKD3	-0.331965	8.49776e-07	C3_06030W_A	NOG1	Putative GTPase; mutation confers hypersensitivity to 5-fluorocytosine (5-FC), 5-fluorouracil (5-FU), and tubercidin (7-deazaadenosine); repressed by prostaglandins; Hap43-induced
A0A1D8PDX1	-0.32994	0.0244016	C1_06640C_A	C1_06640C_A	Ortholog(s) have protein transmembrane transporter activity and role in mitochondrial outer membrane translocase complex assembly, protein targeting to mitochondrion
A0A1D8PRB3	-0.325025	0.000312482	C7_03330C_A	SHM1	Mitochondrial serine hydroxymethyltransferase; complements the glycine auxotrophy of an S. cerevisiae shm1 null shm2 null gly1-1 triple mutant; protein present in exponential and stationary growth phase yeast cultures
Q5AH07	-0.323252	0.000475037	C7_01900W_A	NUC2	Putative NADH-ubiquinone oxidoreductase; identified in detergent-resistant membrane fraction (possible lipid raft component); alkaline repressed; Hap43-repressed; Spider biofilm repressed
A0A1D8PCD7	-0.32257	0.0301118	C1_00980W_A	C1_00980W_A	Ortholog(s) have structural constituent of ribosome activity and mitochondrial large ribosomal subunit, mitochondrion localization
Q92410	-0.322423	0.000324175	CR_05720W_A	TPS1	Trehalose-6-phosphate synthase; role in hyphal growth and virulence in mouse systemic infection; induced in presence of human neutrophils; macrophage/pseudohyphal-repressed after 16h; stationary phase enriched protein; Hap43-repressed
A0A1D8PH56	-0.322123	0.0468599	C2_04380C_A	C2_04380C_A	Ortholog(s) have tetrahydrofolylpolyglutamate synthase activity, role in one-carbon metabolic process and cytoplasm, mitochondrion localization
Q59XV0	-0.321549	0.0290726	C2_10250C_A	SET2	Ortholog(s) have histone methyltransferase activity (H3-K36 specific) activity
A0A1D8PEH4	-0.321161	0.0017487	C1_09020W_A	C1_09020W_A	Putative reductase or dehydrogenase; Hap43-repressed gene; alkaline repressed
A0A1D8PTF8	-0.32067	0.000543671	CR_07280W_A	FRE30	Protein with similarity to ferric reductases; downregulated in response to amphotericin B, estradiol, or ciclopirox olamine, and upregulated by interaction with macrophage; un-merged from orf19.6139 in a revision of Assembly 21
A0A1D8PN34	-0.318635	0.000146234	C5_01140C_A	C5_01140C_A	Ortholog(s) have role in reciprocal meiotic recombination and mitochondrial matrix, mitochondrion localization
A0A1D8PHA3	-0.31863	0.00624625	C2_04950C_A	CYT1	Cytochrome c1; induced in high iron; alkaline repressed; possibly an essential gene, disruptants not obtained by UAU1 method; Hap43-repressed; Spider biofilm repressed
Q5AI30	-0.318008	0.00237616	C1_03280W_A	C1_03280W_A	Ortholog(s) have structural constituent of ribosome activity and mitochondrial small ribosomal subunit localization
Q5AFK3	-0.316559	0.0194191	C7_00530C_A	PSF3	Putative GINS complex subunit; cell-cycle regulated periodic mRNA expression; Spider biofilm induced
A0A1D8PMJ7	-0.315884	0.013341	C4_06290W_A	C4_06290W_A	Ortholog(s) have chromatin DNA binding activity
A0A1D8PLB3	-0.313947	0.0138661	C4_01650C_A	C4_01650C_A	Putative cleavage and polyadenylation factor; heterozygous null mutant exhibits hypersensitivity to parnafungin and cordycepin in the C. albicans fitness test; possibly an essential gene, disruptants not obtained by UAU1 method
Q59X74	-0.313044	0.0229325	CR_07950W_A	IMP4	Putative SSU processome component; Hap43-induced; repressed by prostaglandins; Spider biofilm induced
A0A1D8PR62	-0.311624	0.00302597	C7_02920W_A	C7_02920W_A	Has domain(s) with predicted amidase activity, carbon-nitrogen ligase activity, with glutamine as amido-N-donor activity
Q5ABB8	-0.311382	2.66957e-06	C1_00560W_A	CNS1	Putative co-chaperone; Hap43p-induced gene; mutation confers hypersensitivity to radicicol
A0A1D8PKH4	-0.310691	0.0144758	C3_06440W_A	C3_06440W_A	Ortholog(s) have structural constituent of nuclear pore activity
Q59YL9	-0.31069	0.000308603	C5_02070C_A	C5_02070C_A	Ortholog(s) have ATPase activator activity, RNA binding activity
A0A1D8PHR0	-0.31004	3.14497e-08	C2_06640C_A	VAS1	Putative tRNA-Val synthetase; genes encoding ribosomal subunits, translation factors, and tRNA synthetases are downregulated upon phagocytosis by murine macrophage
A0A1D8PH42	-0.30969	9.1383e-06	C2_04230W_A	BAT21	Putative branched chain amino acid aminotransferase; regulated by Gcn4, Gcn2; induced in response to amino acid starvation (3-aminotriazole treatment); early-stage flow model biofilm formation
Q59R99	-0.308563	0.00634865	C4_05240C_A	VPH1	Vacuolar H(+)-ATPase; transcription regulated by Nrg1, Mig1, and Tup1
Q5APK5	-0.308025	0.0260815	C1_09030C_A	COX5	Cytochrome oxidase subunit V; putative upstream CCAAT box regulatory element; macrophage/pseudohyphal-induced; repressed by nitric oxide; intron in 5'-UTR; Hap43p-dependent repression in low iron medium
A0A1D8PKK7	-0.306637	0.000165395	C3_06540C_A	C3_06540C_A	Ortholog of C. dubliniensis CD36 : Cd36_86510, C. parapsilosis CDC317 : CPAR2_206110, C. auris B8441 : B9J08_002384 and Candida tenuis NRRL Y-1498 : CANTEDRAFT_112184
Q59WK1	-0.306304	0.000493783	C1_11150W_A	C1_11150W_A	Ortholog(s) have role in proteasome regulatory particle assembly and cytoplasm, cytosol, nucleus localization
Q5A5V8	-0.304395	4.17623e-08	C4_04160W_A	C4_04160W_A	Ortholog of C. dubliniensis CD36 : Cd36_43710, C. parapsilosis CDC317 : CPAR2_402940, C. auris B8441 : B9J08_005206 and Candida tenuis NRRL Y-1498 : CANTEDRAFT_114940
Q5AFE4	-0.303478	0.0436229	C7_00020C_A	RVS161	Protein required for endocytosis; contains a BAR domain, which is found in proteins involved in membrane curvature; null mutant exhibits defects in hyphal growth, virulence, cell wall integrity, and actin patch localization
A0A1D8PEV9	-0.303415	6.77389e-07	C1_10470W_A	C1_10470W_A	Mitochondrial ribosomal protein of the small subunit; Spider biofilm repressed
A0A1D8PH73	-0.303091	0.00224999	C2_04620W_A	C2_04620W_A	Predicted ortholog of S. cerevisiae Swi3, subunit of the SWI/SNF chromatin remodeling complex; possibly an essential gene, disruptants not obtained by UAU1 method
Q5A396	-0.302582	0.0336709	CR_08100C_A	RIO2	Putative serine kinase with a predicted role in the processing of the 20S pre-rRNA into mature 18S rRNA; null mutants are hypersensitive to caspofungin
A0A1D8PMB0	-0.302402	0.0345772	C4_05290W_A	ABZ1	Ortholog(s) have 4-amino-4-deoxychorismate synthase activity and role in para-aminobenzoic acid biosynthetic process
A0A1D8PMH1	-0.302276	0.0038113	C4_06050W_A	MED3	RNA polymerase II mediator complex subunit
A0A1D8PPY6	-0.302059	0.000428103	C6_02690C_A	C6_02690C_A	Protein with similarity to S. pombe Nrd1p; transcription induced upon induction of hyphal growth; regulated by Cph1p, Efg1p, Cph2p; low-level expression; alkaline upregulated; fungal-specific (no human or murine homolog)
Q5AAG6	-0.301902	0.0183134	CR_00120C_A	MKC1	MAP kinase; role in biofilm formation, contact-induced invasive filamentation, systemic virulence in mouse, cell wall structure/maintenance, caspofungin response; phosphorylated on surface contact, membrane perturbation, or cell wall stress
Q59W04	-0.300944	0.0433882	C1_02310C_A	C1_02310C_A	Ortholog(s) have chromatin DNA binding activity and role in cell wall mannoprotein biosynthetic process, positive regulation of transcription by RNA polymerase II, telomere maintenance, telomere maintenance via recombination
A0A1D8PCE7	-0.300437	0.00347832	C1_01160C_A	C1_01160C_A	Exosome non-catalytic core component; involved in 3'-5' RNA processing and degradation in the nucleus and cytoplasm; Spider biofilm induced
Q5AB94	-0.300242	0.0319293	C1_00320W_A	C1_00320W_A	Ortholog(s) have cargo adaptor activity, role in intracellular protein transport, retrograde transport, endosome to Golgi and endosome, retromer complex, retromer, cargo-selective complex localization
A0A1D8PDI3	-0.299439	0.0490262	C1_05180C_A	C1_05180C_A	Protein with a NADH-ubiquinone oxidoreductase B18 subunit domain; gene has intron
A0A1D8PRG9	-0.298126	0.00510946	C7_03990C_A	C7_03990C_A	Ortholog(s) have RNA binding activity and role in tRNA modification
A0A1D8PMM2	-0.297867	0.020706	C4_06680C_A	C4_06680C_A	Ortholog(s) have role in endoplasmic reticulum to Golgi vesicle-mediated transport and endoplasmic reticulum membrane, extrinsic component of membrane localization
A0A1D8PFV2	-0.297629	0.030021	C1_14220C_A	FTR2	High-affinity iron permease; probably interacts with ferrous oxidase; regulated by iron level, ciclopirox olamine, amphotericin B, caspofungin; complements S. cerevisiae ftr1 iron transport defect; Hap43-repressed; Spider biofilm induced
P30418	-0.297179	0.0249059	C4_01440W_A	NMT1	Myristoyl-CoA:protein N-myristoyltransferase; attaches the fatty acid myristate to a small number of proteins at an N-terminal Gly; essential; antifungal drug target; functional homolog of S. cerevisiae Nmt1p
Q5AA00	-0.297056	0.0490967	C1_05670W_A	C1_05670W_A	Has domain(s) with predicted peptidase activity and role in proteolysis
A0A1D8PRH1	-0.296102	1.03905e-05	C7_04010W_A	SSQ1	Protein involved in intracellular sequestering of iron ion and mitochondrial iron-sulfur cluster assembly; repression leads to defects in respiratory growth, activation of autophagy, attenuated virulence
A0A1D8PI76	-0.295494	0.0362	C2_08160C_A	C2_08160C_A	Ortholog(s) have role in ER-dependent peroxisome organization, endoplasmic reticulum inheritance, endoplasmic reticulum organization and endoplasmic reticulum tubular network membrane organization, more
A0A1D8PFC8	-0.292053	0.010544	C1_12210W_A	TRP3	Putative bifunctional enzyme with predicted indole-3-glycerol-phosphate synthase and anthranilate synthase activities; regulated by Gcn2p and Gcn4p
Q59NP1	-0.291877	0.0126956	C6_00790C_A	CTR1	Copper transporter; transcribed in low copper; induced Mac1, Tye7, macrophage interaction, alkaline pH via Rim101; 17-beta-estradiol repressed; complements S. cerevisiae ctr1 ctr3 copper transport mutant; flow model/Spider biofilm induced
Q5ANA1	-0.291595	0.00477792	C3_05240C_A	RPL8B	Predicted ribosomal protein; regulated upon yeast-hypha switch; repressed upon phagocytosis by murine macrophage; Spider biofilm repressed
Q59Z51	-0.290258	0.0127877	C2_06950C_A	C2_06950C_A	Putative metalloprotease of the mitochondrial inner membrane; expression downregulated in an ssr1 null mutant
A0A1D8PQI0	-0.288616	0.0155451	C7_00140C_A	C7_00140C_A	Ortholog of S. cerevisiae : YGL242C, C. glabrata CBS138 : CAGL0H07755g, C. dubliniensis CD36 : Cd36_70350, C. parapsilosis CDC317 : CPAR2_300160 and C. auris B8441 : B9J08_000897
G1UB37	-0.288395	0.0179424	C7_01520W_A	FLU1	Multidrug efflux pump of the plasma membrane; MDR family member of the MFS (major facilitator superfamily) of transporters; involved in histatin 5 efflux; fungal-specific (no human/murine homolog)
Q59VP7	-0.288306	9.67568e-06	C1_04130W_A	ERB1	Protein with a predicted role in ribosomal large subunit biogenesis; mutation confers hypersensitivity to 5-fluorocytosine (5-FC), 5-fluorouracil (5-FU), and tubercidin (7-deazaadenosine); hyphal, macrophage repressed
G1UB11	-0.28758	0.00104961	C7_02840C_A	ERG5	Putative C-22 sterol desaturase; fungal C-22 sterol desaturases are cytochrome P450 enzymes of ergosterol biosynthesis, catalyze formation of the C-22(23) double bond in the sterol side chain; transposon mutation affects filamentous growth
A0A1D8PG94	-0.286219	2.67521e-06	C2_01030W_A	C2_01030W_A	Ortholog(s) have structural constituent of ribosome activity, role in mitochondrial translation and mitochondrial large ribosomal subunit localization
A0A1D8PLA3	-0.284655	0.000125488	C4_01450W_A	PWP1	Putative rRNA processing protein; Hap43-induced; repressed in core stress response
Q5A779	-0.284144	0.00571135	C1_08100W_A	DRG1	Member of the DRG family of GTP-binding proteins; involved in regulation of invasive filamentous growth
Q5ADQ9	-0.28326	0.0017791	C3_07180C_A	BMT1	Beta-mannosyltransferase, required for addition of the 1st beta-mannose residue to acid-stable fraction of cell wall phosphopeptidomannan; 9-gene family member; mutants induce higher levels of inflammatory cytokines in mouse dendritic cells
A0A1D8PTL2	-0.282987	0.0439746	CR_07760W_A	CR_07760W_A	Ortholog(s) have structural constituent of ribosome activity and mitochondrial small ribosomal subunit localization
A0A1D8PG31	-0.282926	0.00935202	C2_00410C_A	C2_00410C_A	Ortholog of S. cerevisiae Ecm16, an essential DEAH-box ATP-dependent RNA helicase specific to the U3 snoRNP required for 18S rRNA synthesis; Hap43-induced; Spider biofilm induced
Q59ST1	-0.282789	0.00253346	C3_03790W_A	MEU1	Putative methylthioadenosine phosphorylase; protein level decreases in stationary phase cultures
A0A1D8PNB3	-0.282664	0.0260545	C5_01960C_A	C5_01960C_A	Putative ortholog of human electron transfer flavoprotein dehydrogenase (ETF-dH); alkaline repressed; repressed by nitric oxide; virulence-group-correlated expression; Spider biofilm induced
A0A1D8PEX3	-0.282549	1.64173e-09	C1_10670C_A	RPA190	Putative RNA polymerase I subunit A190; Hap43p-induced gene; flucytosine induced
Q59M30	-0.281771	0.00930986	C1_12590W_A	ATP20	Putative mitochondrial ATP synthase; shows colony morphology-related gene regulation by Ssn6p; flucytosine induced; caspofungin repressed; macrophage/pseudohyphal-induced
Q5AI37	-0.280634	0.00693245	C1_03230C_A	ARX1	Putative ribosomal large subunit biogenesis protein; repressed in core stress response; repressed by prostaglandins
A0A1D8PHD8	-0.279905	0.0124155	C2_05340C_A	RPC40	Putative RNA polymerase; protein level decreases in stationary phase cultures; Hap43p-induced gene
A0A1D8PQN1	-0.277609	0.00269521	C7_00720W_A	RTF1	Putative RNA polymerase II-associated Paf1 complex subunit; induced during the mating process
A0A1D8PRP8	-0.276051	3.58449e-05	CR_00360C_A	LEU1	3-isopropylmalate dehydratase; antigenic in humans; repressed in hyphae; alkaline repressed; upregulated by human whole blood or PMNs; regulated by Sef1, Sfu1, and Hap43; rat catheter biofilm induced, Spider biofilm repressed
A0A1D8PRK7	-0.275699	0.0170858	C7_04280C_A	C7_04280C_A	Putative catechol o-methyltransferase; stationary phase enriched protein; transcription upregulated in clinical isolates from HIV+ patients with oral candidiasis; Spider biofilm repressed
Q92206	-0.274901	0.0389163	C1_08590C_A	ERG1	Squalene epoxidase, epoxidation of squalene to 2,3(S)-oxidosqualene; ergosterol biosynthesis; allylamine antifungal drug target; NADH reducing cofactor but S. cerevisiae Erg1 uses NADPH; flow model biofilm induced; Spider biofilm repressed
A0A1D8PJN6	-0.272943	0.00359774	C3_02960C_A	KRE5	UDP-glucose:glycoprotein glucosyltransferase; 1,6-beta-D-glucan biosynthesis, hyphal growth, virulence in mouse IV model; partially complements S. cerevisiae kre5 mutant defects; flow biofilm repressed, Bcr1-repressed in RPMI a/a biofilms
Q5A7Q9	-0.272258	0.00102301	C3_00560C_A	SOF1	Putative protein with a predicted role in 40S ribosomal subunit biogenesis; rat catheter biofilm induced
Q5AP66	-0.271902	0.0327416	C1_10270C_A	SFH5	Putative phosphatidylinositol transporter; rat catheter and Spider biofilm repressed
Q5AJ69	-0.271595	0.0350863	C3_01280W_A	C3_01280W_A	Ortholog(s) have role in response to purine-containing compound
Q59NQ5	-0.270538	1.53679e-08	C5_01520C_A	GLR1	Glutathione reductase; upregulated by human neutrophils; oxidative stress-induced regulation via Cap1p; overexpression correlates with multidrug resistance in a cap1 mutant, farnesol induced; stationary phase enriched protein
Q5A1L8	-0.268582	0.00362072	C5_00900C_A	URA4	Dihydroorotase; protein present in exponential and stationary growth phase yeast cultures
A0A1D8PM81	-0.268526	0.0110896	C4_04970C_A	C4_04970C_A	Ortholog(s) have role in cristae formation, membrane organization and MICOS complex, mitochondrial crista junction localization
Q5ALP7	-0.268302	0.00427851	C2_02120W_A	C2_02120W_A	Putative mitochondrial RNA polymerase specificity factor; possibly an essential gene, disruptants not obtained by UAU1 method
Q59SJ6	-0.268113	0.00304298	C4_00660W_A	C4_00660W_A	Ortholog(s) have structural constituent of ribosome activity and mitochondrial small ribosomal subunit localization
Q5AKU7	-0.2664	0.000844721	C1_13920W_A	DOS2	Protein of unknown function; induced during planktonic growth
P0CY33	-0.264902	0.0313618	C1_08450C_A	CDC42	Rho-type GTPase; required for budding and maintenance of hyphal growth; GGTase I geranylgeranylated; misexpression blocks hyphal growth, causes avirulence in mouse IV infection; shows actin-dependent localization to hyphal tip
Q5A0I6	-0.264302	0.000479411	C2_02810C_A	NCB2	Beta subunit of NC2, heterodimeric regulator of transcription; activates CDR1 transcription; possibly an essential gene, disruptants not obtained by UAU1 method; conditional mutants show decreased susceptibility to azoles
A0A1D8PQ89	-0.263471	0.0210048	C6_03730C_A	C6_03730C_A	Ortholog(s) have structural constituent of ribosome activity and mitochondrial small ribosomal subunit localization
Q5ANA3	-0.258928	1.811e-07	C3_05220W_A	CDR1	Multidrug transporter of ABC superfamily; transports phospholipids in an in-to-out direction; induced by beta-estradiol, progesterone, corticosteroid, or cholesterol; Spider biofilm induced
Q5AD50	-0.258416	0.00276016	C2_01070W_A	C2_01070W_A	Ortholog(s) have RNA polymerase I activity and role in nucleolar large rRNA transcription by RNA polymerase I, transcription by RNA polymerase I, transcription elongation from RNA polymerase I promoter
Q5A013	-0.257443	0.00206274	CR_03760W_A	CR_03760W_A	Ortholog(s) have N-terminal protein N-methyltransferase activity, S-adenosylmethionine-dependent methyltransferase activity, protein-lysine N-methyltransferase activity
Q5A346	-0.257174	0.000599824	CR_08490W_A	TSR1	Component of 20S pre-rRNA processing unit; repressed by prostaglandins
A0A1D8PH78	-0.256413	2.90028e-05	C2_04580W_A	ERG20	Putative farnesyl pyrophosphate synthetase involved in isoprenoid and sterol biosynthesis, based on similarity to S. cerevisiae Erg20p; likely to be essential for growth, based on an insertional mutagenesis strategy
A0A1D8PQ03	-0.256293	0.00298019	C6_02880W_A	C6_02880W_A	Ortholog(s) have RNA-DNA hybrid ribonuclease activity, role in RNA catabolic process and nuclear chromatin localization
A0A1D8PLW3	-0.255765	0.0456185	C4_03720C_A	C4_03720C_A	Has domain(s) with predicted 2-oxoglutarate-dependent dioxygenase activity and role in oxidation-reduction process
Q5A044	-0.254471	8.54115e-05	CR_03530W_A	CR_03530W_A	Mitochondrial inner membrane protein; mammalian mitofilin domain; Spider biofilm repressed
Q5A1Z1	-0.252728	0.0160265	CR_02950C_A	CR_02950C_A	Ortholog(s) have structural constituent of ribosome activity, role in mitochondrial translation, mitochondrial translational initiation and mitochondrial small ribosomal subunit localization
Q5A6N1	-0.252529	0.000323114	CR_04340W_A	PIM1	ATP-dependent Lon protease; role in degradation of misfolded proteins in mitochondria, biogenesis and maintenance of mitochondria; rat catheter biofilm induced
Q5A4Z9	-0.252062	0.0063906	C5_00420C_A	MRP17	Predicted mitochondrial ribosomal protein
A0A1D8PQ43	-0.251448	0.0174203	C6_03260W_A	C6_03260W_A	Putative ribonuclease H1; possibly an essential gene, disruptants not obtained by UAU1 method; flow model biofilm induced; Spider biofilm induced
A0A1D8PDW1	-0.250515	0.0049058	C1_06540C_A	C1_06540C_A	Exosome non-catalytic core component; involved in 3'-5' RNA processing and degradation in the nucleus and cytoplasm; Spider biofilm induced
Q5AH35	-0.249501	0.0158607	C7_02120C_A	C7_02120C_A	Ortholog(s) have structural constituent of ribosome activity, role in mitochondrial translation and mitochondrial large ribosomal subunit localization
A0A1D8PGR5	-0.248301	1.08172e-10	C2_02540W_A	C2_02540W_A	Ortholog of S. cereviaie Rrp5, an RNA binding protein involved in synthesis of 18S and 5.8S rRNAs; Hap43-induced gene
A0A1D8PF14	-0.247928	0.0153508	C1_10880W_A	C1_10880W_A	Putative U3 snoRNA-associated protein; Hap43-induced; transposon mutation affects filamentous growth; repressed by prostaglandins
Q5AB84	-0.247286	0.0482288	C1_00160C_A	C1_00160C_A	Putative nucleolar protein with a predicted role in pre-rRNA processing and ribosome biogenesis; repressed by nitric oxide; required for flow model biofilm formation; Spider biofilm repressed
Q5A213	-0.247005	0.0417127	CR_02710W_A	RRP9	Ribosomal protein; mutation confers resistance to 5-fluorocytosine (5-FC), 5-fluorouracil (5-FU), and tubercidin (7-deazaadenosine); physically interacts with TAP-tagged Nop1; Hap43-induced; Spider biofilm induced
A0A1D8PI86	-0.246936	0.00935202	C2_08180C_A	C2_08180C_A	Ortholog(s) have role in ribosomal large subunit biogenesis, ribosomal small subunit biogenesis and nucleolus localization
A0A1D8PMA9	-0.24482	0.00735425	C4_05330C_A	C4_05330C_A	Putative protein with a predicted role in 60S ribosomal subunit biogenesis; Hap43p-induced gene; ortholog of S. cerevisiae MAK11
Q5AEI1	-0.2422	0.0418095	C3_02940C_A	NUO2	NADH-ubiquinone oxidoreductase subunit; Hap43p-repressed gene; repressed by nitric oxide; identified in detergent-resistant membrane fraction (possible lipid raft component)
Q5A460	-0.241184	0.0322901	C4_05650W_A	C4_05650W_A	Ortholog(s) have role in maturation of SSU-rRNA from tricistronic rRNA transcript (SSU-rRNA, 5.8S rRNA, LSU-rRNA) and nucleolus localization
A0A1D8PHU4	-0.241094	0.0435601	C2_07010W_A	C2_07010W_A	Predicted ER protein involved in ER-nucleus signaling; Spider biofilm repressed
A0A1D8PMH8	-0.240252	0.000178687	C4_06120W_A	GDH3	NADP-glutamate dehydrogenase; Nrg1, Plc1 regulated; hypha, hypoxia, Efg1-repressed; Rim101-induced at pH 8; GlcNAc, ciclopirox, ketoconazole induced; exp and stationary phase protein; Spider biofilm repressed; rat catheter biofilm induced
Q5A927	-0.239912	0.0217266	C1_01190C_A	C1_01190C_A	Flavin-containing monooxygenase; catalyzes oxidation of biological thiols to maintain the ER redox buffer ratio for correct folding of disulfide-bonded proteins; Spider biofilm repressed
A0A1D8PNN8	-0.239707	0.000947285	C5_03280W_A	CAM1-1	Putative translation elongation factor; downregulated upon phagocytosis by murine macrophages; Hap43-induced gene; Spider biofilm repressed
A0A1D8PTY4	-0.239703	0.00011854	CR_09370W_A	ELF1	Putative mRNA export protein; Walker A and B (ATP/GTP binding) motifs; required for wild-type morphology, growth; expressed in hyphal, pseudohyphal, and yeast form; Hap43-induced; Spider and flow model biofilm induced
A0A1D8PKL0	-0.238049	2.14688e-06	C3_06360C_A	CYP5	Putative peptidyl-prolyl cis-trans isomerase; macrophage-downregulated protein level; protein level decrease in stationary phase cultures; predicted endoplasmic reticulum (ER) localization
Q59QR8	-0.237802	0.0327192	C5_03240W_A	BUB3	Protein similar to S. cerevisiae Bub3; a kinetochore checkpoint component; induced by hydroxyurea treatment; flow model biofilm induced; Spider biofilm induced
A0A1D8PIR2	-0.237077	4.0341e-07	C2_10550C_A	GCN1	Ortholog(s) have protein kinase activator activity, protein kinase regulator activity
A0A1D8PSJ6	-0.236999	0.00175324	CR_03610C_A	VTC3	Putative polyphosphate synthetase; downregulated in core caspofungin response; Hog1p-induced; transcription is opaque-specific; fungal-specific (no human or murine homolog)
A0A1D8PIX3	-0.236748	0.00215154	C3_00330W_A	UTP8	Essential nucleolar protein; involved in tRNA export from the nucleus and ribosomal small subunit biogenesis; physically interacts with TAP-tagged Nop1; Spider biofilm induced
Q5AMM4	-0.236714	0.00947727	C4_01720C_A	C4_01720C_A	Ortholog(s) have role in cellular response to DNA damage stimulus, protein ubiquitination, telomere maintenance, transcription-coupled nucleotide-excision repair, ubiquitin-dependent protein catabolic process and nucleus localization
Q5A416	-0.236242	0.0329105	CR_08940W_A	CR_08940W_A	Ortholog(s) have tRNA (adenine-N1-)-methyltransferase activity, role in tRNA methylation and nucleus, tRNA (m1A) methyltransferase complex localization
Q5A6Q6	-0.234011	8.5668e-11	CR_04140W_A	CR_04140W_A	Putative mitochondrial ribosomal component of the small subunit; possibly an essential gene, disruptants not obtained by UAU1 method; Spider biofilm repressed
Q5A5B2	-0.233863	0.000912979	C7_02930C_A	C7_02930C_A	Ortholog(s) have role in maturation of SSU-rRNA
Q59W44	-0.233725	0.001214	C1_11220C_A	TIM50	Predicted component of the Translocase of the Inner Mitochondrial membrane (TIM23 complex); involved in mitochondrial protein import; Spider biofilm repressed
Q5A2T3	-0.232398	6.71746e-11	C2_08010W_A	BLM3	Putative proteasome activator; binds core proteasome and stimulates proteasome-mediated protein degradation by inducing gate opening; ortholog of S. cerevisiae Blm10; transcript regulated by Nrg1 and Mig1
Q59MK3	-0.231976	0.0461774	C5_03920C_A	C5_03920C_A	Putative rRNA processing protein; Spider biofilm induced
A0A1D8PUA1	-0.231899	6.31389e-05	CR_10620C_A	BPL1	Biotin protein ligase; catalyzes covalent attachment of biotin to biotin-dependent enzymes including acetyl CoA carboxylase and pyruvate carboxylase; transcription regulated by biotin availability and Vhr1p
Q9B8D8	-0.231434	0.00472772	CM_00030W	COX2	Subunit II of cytochrome c oxidase, which is the terminal member of the mitochondrial inner membrane electron transport chain; one of three mitochondrially-encoded subunits
A0A1D8PJ38	-0.231028	0.0112563	C3_00820W_A	SCT1	Putative glycerol-3-phosphate O-acyltransferase; fungal-specific (no human or murine homolog)
A0A1D8PRS2	-0.230441	0.0106622	CR_00670C_A	CR_00670C_A	Putative 2'-O-methyltransferase with a predicted role in tRNA modification; transcription is activated in the presence of elevated CO2
A0A1D8PEL1	-0.227773	2.40769e-05	C1_09460W_A	ERG12	Ortholog(s) have mevalonate kinase activity and role in ergosterol biosynthetic process, farnesyl diphosphate biosynthetic process, mevalonate pathway, isopentenyl diphosphate biosynthetic process, mevalonate pathway
A0A1D8PPT5	-0.227521	0.0200799	C6_02070C_A	RPL23A	Ribosomal protein; downregulated upon phagocytosis by murine macrophage; Hap43-induced; sumoylation target; Spider biofilm repressed
Q5ALV9	-0.227514	0.00539275	C2_01590W_A	COX13	Cytochrome c oxidase; flucytosine induced; repressed by nitric oxide
Q5AK43	-0.226276	0.0156178	C5_04900C_A	C5_04900C_A	Protein with a role in translation; flow model biofilm repressed
Q5A3K7	-0.226168	0.00971384	C1_12030W_A	SER33	Predicted enzyme of amino acid biosynthesis; Gcn4p-regulated; upregulated in biofilm; protein present in exponential and stationary growth phase yeast cultures; S. cerevisiae ortholog is Gcn4p regulated
A0A1D8PJD2	-0.225495	4.62345e-07	C3_02180C_A	C3_02180C_A	Deoxyhypusine synthase; catalyzes formation of deoxyhypusine, the first step in hypusine biosynthesis; Spider biofilm repressed
Q5AK02	-0.222566	0.00294949	C5_05250C_A	C5_05250C_A	Ortholog(s) have structural constituent of ribosome activity and mitochondrial small ribosomal subunit localization
Q5AB15	-0.221876	1.26854e-05	C1_06760C_A	C1_06760C_A	Putative U2 snRNP component; mutation confers hypersensitivity to 5-fluorocytosine (5-FC), 5-fluorouracil (5-FU), and tubercidin (7-deazaadenosine); Hap43-induced, Spider biofilm induced
A0A1D8PN49	-0.221365	0.0137698	C5_01050C_A	C5_01050C_A	Ortholog(s) have structural constituent of ribosome activity and mitochondrial large ribosomal subunit localization
Q59WF0	-0.221105	0.00239937	C1_10700C_A	NIT3	Putative nitrilase; regulated by Gcn2p and Gcn4p; protein present in exponential and stationary growth phase yeast cultures
Q59ZE2	-0.21942	0.0178518	C2_05470W_A	COQ5	Putative methyltransferase of ubiquinone biosynthesis; regulated by Gcn4; repressed by amino acid starvation (3-AT), Hap43; induced upon adherence to polystyrene; Spider biofilm repressed
Q59KZ3	-0.219049	0.0185773	C1_04420C_A	URA6	Ortholog(s) have adenylate kinase activity, uridylate kinase activity, role in 'de novo' pyrimidine nucleobase biosynthetic process, nucleobase-containing compound metabolic process and cytoplasm, nucleus localization
Q5A4X9	-0.218697	0.0029661	C5_00280C_A	C5_00280C_A	Major mitochondrial nuclease; has RNAse and DNA endo- and exonucleolytic activities; roles in mitochondrial recombination, apoptosis and maintenance of polyploidy; Spider biofilm repressed
Q5AAR0	-0.218286	0.044485	C1_06590C_A	C1_06590C_A	Ortholog(s) have RNA polymerase II complex binding, RNA polymerase II transcription factor binding activity
A0A1D8PSX0	-0.215787	0.0241199	CR_05080W_A	VMA13	Predicted proton-transporting ATPase; predicted role in ATP hydrolysis coupled proton transport; rat catheter biofilm repressed
Q5ACK7	-0.215593	5.3608e-06	CR_10550W_A	DRS1	Putative nucleolar DEAD-box protein; Hap43-induced; mutation confers hypersensitivity to 5-fluorouracil (5-FU), tubercidin (7-deazaadenosine); Tbf1-induced; repressed in core stress response
Q59S42	-0.214036	0.0221329	C7_01300C_A	PSF1	Putative GINS complex subunit which is localized to DNA replication origins; implicated in assembly of the DNA replication machinery; flow model biofilm induced
A0A1D8PLT7	-0.213688	0.000232347	C4_03380C_A	DAO2	Putative D-amino acid oxidase; rat catheter biofilm induced
P83781	-0.213596	0.00607417	C1_04100C_A	POR1	Mitochondrial outer membrane porin; in detergent-resistant membrane fraction (possible lipid raft component); antigenic in human, mouse; Hap43p-induced; flucytosine-, macrophage-, farnesol- induced; fluconazole, caspofungin repressed
A0A1D8PEA9	-0.213384	0.00763284	C1_08110W_A	C1_08110W_A	Ortholog(s) have nuclear import signal receptor activity, nuclear localization sequence binding activity
Q59XQ1	-0.213206	0.0239686	C6_01030W_A	HAL22	Putative phosphoadenosine-5'-phosphate or 3'-phosphoadenosine 5'-phosphosulfate phosphatase; possible role in sulfur recycling; Hap43-repressed; F-12/CO2 biofilm induced
Q59RK3	-0.213163	0.0148166	C6_00390W_A	C6_00390W_A	Ortholog(s) have serine-tRNA ligase activity, role in mitochondrial seryl-tRNA aminoacylation, spore germination and mitochondrion localization
A0A1D8PQ25	-0.212566	0.0355386	C6_03120W_A	POL5	Putative DNA Polymerase phi; F-12/CO2 early biofilm induced
A0A1D8PE69	-0.211462	0.000326038	C1_08080C_A	C1_08080C_A	Ortholog of C. dubliniensis CD36 : Cd36_07590, C. parapsilosis CDC317 : CPAR2_206680, C. auris B8441 : B9J08_004229 and Candida tenuis NRRL Y-1498 : CANTEDRAFT_104385
Q59LU0	-0.210864	0.00739839	CR_02530W_A	DBP2	Putative DEAD-box family ATP-dependent RNA helicase; flucytosine induced; repressed in core stress response
A0A1D8PRD5	-0.210742	0.0388367	C7_03400C_A	C7_03400C_A	Ortholog of S. cerevisiae Mtr4, an ATP-dependent 3'-5' RNA helicase of the DEAD-box family; Hap43-induced gene; Spider biofilm induced
A0A1D8PGT5	-0.210417	0.0312009	C2_02970C_A	ALD5	NAD-aldehyde dehydrogenase; decreased expression in fluconazole-resistant isolate, or in hyphae; biofilm induced; fluconazole-downregulated; protein abundance is affected by URA3 expression in the CAI-4 strain; stationary phase enriched
A0A1D8PU19	-0.210093	0.0104717	CR_09730C_A	SSF1	Protein involved in ribosome biogenesis; ortholog of S. cerevisiae Ssf1; Hap43-induced; rat catheter and Spider biofilm induced
Q5ADT9	-0.209606	0.00010707	C3_07390C_A	C3_07390C_A	Ortholog(s) have structural constituent of ribosome activity and mitochondrial small ribosomal subunit localization
A0A1D8PS91	-0.208374	0.000310805	CR_02610C_A	CR_02610C_A	Ortholog(s) have structural constituent of nuclear pore activity and role in NLS-bearing protein import into nucleus, nuclear pore organization, protein import into nucleus, protein localization to nuclear inner membrane
A0A1D8PRE0	-0.207888	0.0300946	C7_03700C_A	ENP1	Protein required for pre-rRNA processing and 40S ribosomal subunit synthesis; associated with U3 and U14 snoRNAs; transposon mutation affects filamentous growth; repressed by prostaglandins; Spider biofilm induced
Q5AF95	-0.207735	0.0399869	C4_02830C_A	HCA4	Putative role in regulation of cell wall biogenesis; Hap43p-induced gene; possibly an essential gene, disruptants not obtained by UAU1 method; flow model and rat catheter biofilm induced
A0A1D8PU53	-0.207233	0.0193517	CR_10040W_A	CR_10040W_A	Ortholog of C. dubliniensis CD36 : Cd36_35095, C. parapsilosis CDC317 : CPAR2_200710, C. auris B8441 : B9J08_002757 and Candida tenuis NRRL Y-1498 : CANTEDRAFT_112338
Q59Z14	-0.206929	0.000670177	C2_07290W_A	C2_07290W_A	Putative deoxyhypusine hydroxylase; ketoconazole-induced; protein level decreases in stationary phase cultures; required for biofilm formation; Spider biofilm repressed
A0A1D8PSU2	-0.206084	0.00275738	CR_04590C_A	PDX3	Pyridoxamine-phosphate oxidase; transcript regulated by yeast-hypha switch and by Nrg1, Mig1, Tup1; Hap43, caspofungin repressed; present in exponential and stationary phase yeast cultures
Q5AH14	-0.205355	0.000408782	C7_01970C_A	TOM40	Protein involved in mitochondrial protein import; Spider biofilm repressed
A0A1D8PQ95	-0.204581	3.63117e-08	C6_03840C_A	SNQ2	Protein similar to S. cerevisiae Snq2p transporter; member of PDR subfamily of ABC family; transposon mutation affects filamentation; benomyl-induced transcription; detected at yeast-form cell plasma membrane by mass spec
A0A1D8PCM2	-0.202974	0.00222616	C1_02180W_A	GAL7	Putative galactose-1-phoshphate uridyl transferase; downregulated by hypoxia, upregulated by ketoconazole; macrophage/pseudohyphal-repressed
Q9UW25	-0.201923	0.000551057	C5_01770C_A	OBPA	Similar to oxysterol binding protein; non-sex gene located within the MTLa mating-type-like locus; Plc1p-regulated
A0A1D8PKY1	-0.199828	0.0293049	C4_00040W_A	CNH1	Na+/H+ antiporter; required for wild-type growth, cell morphology, and virulence in a mouse model of systemic infection; not transcriptionally regulated by NaCl; fungal-specific (no human or murine homolog)
A0A1D8PNX3	-0.199561	0.0240974	C5_04160W_A	SDC1	Putative COMPASS/SET1C histone methyltransferase complex subunit
Q5AMG5	-0.198363	0.000276407	C4_01080W_A	RAT1	5'-->3' exoribonuclease; similar to S. cerevisiae nuclear exoribonuclease Rat1p; suppresses S. cerevisiae kem1 mutant slow growth, mating defect, and haploid invasive growth defect
A0A1D8PQ33	-0.198148	0.00363395	C6_03200W_A	C6_03200W_A	Ortholog of C. dubliniensis CD36 : Cd36_63860, C. parapsilosis CDC317 : CPAR2_601140, C. auris B8441 : B9J08_000407 and Candida tenuis NRRL Y-1498 : CANTEDRAFT_92714
Q59LI2	-0.197321	0.0442178	C2_04680W_A	TIM17	Predicted component of the Translocase of the Inner Mitochondrial membrane (TIM23 complex), involved in protein import into mitochondria
Q59N80	-0.196956	0.0306534	C5_03860W_A	HAM1	Putative deoxyribonucleoside triphosphate pyrophosphohydrolase; caspofungin repressed; regulated by Gcn2p and Gcn4p
A0A1D8PTV1	-0.196699	0.0144987	CR_08930C_A	CR_08930C_A	Ortholog(s) have RNA cap binding, chromatin binding, mRNA binding activity and role in deadenylation-dependent decapping of nuclear-transcribed mRNA, nuclear-transcribed mRNA catabolic process, deadenylation-dependent decay
Q5ADS5	-0.1943	0.00229457	C3_07300W_A	NOP13	Ortholog of S. cerevisiae Nop13; a nucleolar protein found in preribosomal complexes; Hap43-induced gene; rat catheter biofilm induced
A0A1D8PNT8	-0.194266	0.0290726	C5_03840W_A	C5_03840W_A	Thiamine pyrophosphokinase, phosphorylates thiamine to produce the coenzyme thiamine pyrophosphate (thiamine diphosphate); active as a homodimer
A0A1D8PTA6	-0.193941	0.0230098	CR_06500C_A	CR_06500C_A	Protein of unknown function; Hap43-induced; regulated by Nrg1, Tup1; repressed by alpha pheromone in SpiderM medium; Spider biofilm induced; Bcr1-repressed in RPMI a/a biofilms
A0A1D8PSR2	-0.193124	9.3707e-13	CR_04300W_A	CR_04300W_A	Ortholog(s) have tRNA (cytosine-5-)-methyltransferase activity, tRNA binding activity
A0A1D8PJD3	-0.192771	0.0271037	C3_02130W_A	UTP4	Putative U3 snoRNA-associated protein; Hap43-induced; physically interacts with TAP-tagged Nop1; Spider biofilm induced
A0A1D8PFC1	-0.192579	4.21505e-09	C1_12240C_A	C1_12240C_A	Predicted alanine-tRNA ligase; oxidative stress-induced via Cap1
A0A1D8PP14	-0.190323	0.0413229	C5_04590C_A	RPL43A	Putative ribosomal protein, large subunit; repressed by human whole blood or PMNs; colony morphology-related gene regulation by Ssn6; Spider biofilm repressed
A0A1D8PI20	-0.189763	0.0361571	C2_07340W_A	NOC4	Putative nucleolar protein; Hap43-induced; mutation confers resistance to 5-fluorocytosine (5-FC), 5-fluorouracil (5-FU), and tubercidin (7-deazaadenosine); Spider biofilm induced
Q92210	-0.188789	0.00119925	C3_04520C_A	ADE2	Phosphoribosylaminoimadazole carboxylase; role in adenine biosynthesis; required for normal growth and virulence in immunosuppressed mouse infection; not induced in GCN response, in contrast to S. cerevisiae ADE2; stationary phase-enriched
A0A1D8PJT8	-0.188322	0.0307398	C3_04080W_A	C3_04080W_A	Ortholog of subunit 6 of the ubiquinol cytochrome-c reductase complex, a component of the mitochondrial inner membrane electron transport chain; Hap43-repressed gene
A0A1D8PIW1	-0.186612	8.32909e-06	C3_00200C_A	ETR1	Putative 2-enoyl thioester reductase; protein present in exponential and stationary growth phase yeast cultures; rat catheter biofilm repressed
Q5ADU3	-0.185648	0.0327303	C3_07420W_A	C3_07420W_A	Ortholog(s) have eukaryotic 43S preinitiation complex, eukaryotic translation initiation factor 3 complex localization
A0A1D8PK85	-0.185368	0.0081505	C3_05560W_A	PRE3	Putative beta-1 proteasome subunit; macrophage-induced protein; regulated by Gcn2p and Gcn4p; GlcNAc-induced protein
Q5ABY8	-0.185147	0.00209793	C6_02870W_A	RNH1	Ribonuclease H (RNAse H); hyphal-induced; flucytosine induced; similar to orf19.5564 (see Locus History); possibly essential (UAU1 method); rat catheter biofilm induced; flow model biofilm repressed
A0A1D8PQS2	-0.184679	0.0174792	C7_01210C_A	C7_01210C_A	Predicted RNA polymerase III subunit C37; Spider biofilm induced
A0A1D8PDH5	-0.184568	0.00865792	C1_05060W_A	REI1	Putative cytoplasmic pre-60S factor; Hap43-induced; repressed by prostaglandins
Q5A507	-0.183606	0.00437633	C5_00500W_A	NAM7	Putative role in nonsense-mediated mRNA decay; similar to S. cerevisiae Nam7p; gene induced by ciclopirox olamine treatment
Q5A3P4	-0.181763	0.000888276	C1_12380C_A	WRS1	Putative tRNA-Trp synthetase; genes encoding ribosomal subunits, translation factors, tRNA synthetases are downregulated upon phagocytosis by murine macrophages
A0A1D8PCD3	-0.181007	0.0111652	C1_01010W_A	C1_01010W_A	Plasma membrane-localized protein; repressed by nitric oxide; Hap43p-repressed gene
Q59X24	-0.18063	0.0128949	C2_06110W_A	C2_06110W_A	Exopolyphosphatase, hydrolyzes inorganic polyphosphate (poly P) into Pi residues; Spider biofilm repressed
A0A1D8PCI6	-0.180034	0.00526698	C1_01640W_A	RPS42	Predicted ribosomal protein S4, component of the small ribosomal subunit; has paralog RPS41
Q59ZI7	-0.177217	0.000297284	C2_05000C_A	MRPL10	Putative mitochondrial large subunit ribosomal protein; colony morphology-related gene regulation by Ssn6
A0A1D8PRY0	-0.176317	1.03786e-05	CR_01370C_A	CR_01370C_A	Ortholog(s) have structural constituent of ribosome activity and mitochondrial small ribosomal subunit localization
Q5ADR6	-0.173217	0.0193493	C3_07250W_A	GCD2	Putative translation initiation factor; genes encoding ribosomal subunits, translation factors, and tRNA synthetases are downregulated upon phagocytosis by murine macrophage
Q5AD56	-0.17317	0.00934154	C2_01130W_A	NOT3	Transcriptional regulator; not required for buccal epithelial cell adherence or virulence in mouse systemic infection; null mutant colonies exhibit slightly decreased filamentation ratio; required for yeast adherence to silicone substrate
Q59Q34	-0.172308	0.000181348	C2_06540C_A	SPF1	P-type calcium-transporting ATPase, involved in control of calcium homeostasis, response to ER stress, hyphal growth, biofilm formation and virulence
A0A1D8PQS0	-0.172109	0.0323833	C7_00990W_A	RPP0	Putative ribosomal protein; antigenic in mouse; repressed upon phagocytosis by murine macrophage; induced by Tbf1; overlaps orf19.7014; Spider biofilm repressed
Q5A6L4	-0.171835	0.0446735	CR_04490C_A	CR_04490C_A	Has domain(s) with predicted palmitoyl-(protein) hydrolase activity and role in cellular protein modification process
Q5ALX3	-0.171365	0.000827975	C2_01480W_A	SPT5	Protein similar to S. cerevisiae Spt5p transcription elongation factor; transposon mutation affects filamentous growth
A0A1D8PKB4	-0.170827	0.0478143	C3_05650W_A	YCK2	Plasma membrane protein similar to S. cerevisiae casein kinase I; mutation or inhibition impairs virulence and morphogenesis; transcription is activated in weak acid stress or on contact with with host cells
A0A1D8PDH0	-0.170172	0.00914945	C1_05160C_A	C1_05160C_A	Putative phosphatidyl synthase; stationary phase enriched protein; transcript repressed by yeast-hypha switch; Hap43-repressed; rat catheter, Spider and flow model biofilm induced
Q5AHA6	-0.168898	0.00597438	C2_03360W_A	C2_03360W_A	Putative AMP deaminase; possibly an essential gene, disruptants not obtained by UAU1 method
Q5A357	-0.167581	0.000131523	CR_08400C_A	CR_08400C_A	Ortholog(s) have structural constituent of ribosome activity and mitochondrial small ribosomal subunit localization
A0A1D8PMT8	-0.167331	0.00649524	C5_00030W_A	C5_00030W_A	Putative mitochondrial ribosomal protein of the large subunit; transcript is upregulated in clinical isolates from HIV+ patients with oral candidiasis; Spider biofilm repressed
Q5ADP3	-0.165712	0.037925	C3_07020W_A	SSN6	Functional homolog of S. cerevisiae Cyc8/Ssn6; hyphal growth regulator; repressed during hyphal growth; Ssn6 and Tup1 regulate distinct sets of genes; overexpression or mutation causes avirulence in mouse IV infection; TPR motifs
A0A1D8PPB2	-0.163411	0.0387165	C6_00200C_A	C6_00200C_A	Protein of unknown function; induced in high iron; possibly subject to Kex2 processing; Hap43-repressed
Q5ADX4	-0.163338	0.0244163	C3_07700W_A	C3_07700W_A	Putative serine hydrolase; Spider biofilm repressed
Q5ALK3	-0.162953	0.0270463	C2_02510W_A	PRS1	Phosphoribosylpyrophosphate synthetase; enzyme of purine, pyrimidine, histidine, and tryptophan biosynthesis; essential; flucytosine induced; macrophage/pseudohyphal-induced
A0A1D8PMB8	-0.161852	0.0339393	C4_05540W_A	HOM3	Putative L-aspartate 4-P-transferase; fungal-specific (no human or murine homolog); regulated by Gcn2 and Gcn4; early-stage flow model biofilm induced
A0A1D8PM77	-0.157391	0.0260545	C4_05010W_A	C4_05010W_A	Protein with a predicted role in ribosome biogenesis; mutation confers hypersensitivity to 5-fluorocytosine (5-FC), 5-fluorouracil (5-FU); repressed in core stress response; repressed by prostaglandins; Hap43-induced
Q5ACU9	-0.154608	0.0334018	C2_00140W_A	NDT80	Ortholog of Ndt80; meiosis-specific transcription factor; activator of CDR1 induction by antifungal drugs; required for wild-type drug resistance and for Spider biofilm formation; transcript induced by antifungal drug treatment
A0A1D8PCP2	-0.154218	0.0466843	C1_02090C_A	C1_02090C_A	Predicted debranching enzyme-associated ribonuclease; rat catheter biofilm induced
Q59TE0	-0.153372	0.0436479	C2_04600C_A	RPL17B	Ribosomal protein L17; mutation confers hypersensitivity to 5-FU, tubercidin; repressed upon phagocytosis by macrophage; Hap43-induced; Spider biofilm repressed
A0A1D8PU46	-0.152815	0.00190034	CR_09950C_A	SIK1	Putative U3 snoRNP protein; Hap43p-induced gene; physically interacts with TAP-tagged Nop1p
A0A1D8PIZ2	-0.151623	0.0313268	C3_00620C_A	C3_00620C_A	Ortholog(s) have role in mitochondrial respiratory chain complex IV assembly and integral component of mitochondrial inner membrane, mitochondrial intermembrane space localization
A0A1D8PCI5	-0.151051	0.00285039	C1_01530C_A	C1_01530C_A	Putative tRNA-Arg synthetase; essential; genes encoding ribosomal subunits, translation factors, and tRNA synthetases are downregulated upon phagocytosis by murine macrophage; downregulated by growth in the mouse cecum
A0A1D8PKZ3	-0.151046	0.00131716	C4_00220C_A	SUB2	Putative TREX complex component with a predicted role in nuclear mRNA export; transcription is regulated by Mig1; Hap43-induced gene; Spider biofilm repressed
A0A1D8PD15	-0.150316	0.0294736	C1_03520W_A	RPN3	Putative non-ATPase regulatory subunit of the 26S proteasome lid; amphotericin B repressed; oxidative stress-induced via Cap1p
Q59Z68	-0.149113	0.0135691	C2_06790W_A	C2_06790W_A	Putative pre-mRNA-splicing factor; decreased transcription is observed upon benomyl treatment
Q5A6S7	-0.147423	0.0026642	CR_03950W_A	CR_03950W_A	Ortholog(s) have role in mitochondrial translation and mitochondrion localization
A0A1D8PNY8	-0.147109	0.0195131	C5_04430C_A	YUH2	Putative ubiquitin C-terminal hydrolase; sumoylation target
A0A1D8PL02	-0.144319	0.0341795	C4_00330C_A	C4_00330C_A	Ortholog(s) have proton-transporting ATP synthase activity, rotational mechanism, structural molecule activity and role in ATP synthesis coupled proton transport, cristae formation, protein complex oligomerization
Q59TT2	-0.143554	0.0235651	C1_11580W_A	C1_11580W_A	Protein of unknown function; transcript upregulated by benomyl treatment
Q59UI0	-0.142876	0.0379355	CR_03380W_A	MTG1	Putative mitochondrial GTPase; likely essential for respiratory competence and in large ribosomal subunit assembly; mitochondrial translation; Spider biofilm induced
A0A1D8PLH0	-0.141312	0.0131258	C4_01870C_A	ERG8	Putative phosphomevalonate kinase; enzyme of the mevalonate pathway of isoprenoid biosynthesis; transcript regulated by Nrg1; possible drug target; not conserved in H. sapiens
Q5A922	-0.139274	0.00207468	C1_01250W_A	C1_01250W_A	Protein of unknown function; flow model and Spider biofilm repressed
Q59M49	-0.138815	7.33269e-06	CR_05520W_A	NOC2	Putative nucleolar complex protein; Hap43-induced; transposon mutation affects filamentous growth; mutation confers hypersensitivity to 5-fluorouracil (5-FU), tubercidin (7-deazaadenosine); repressed in core stress response
A0A1D8PRB0	-0.137854	0.00237046	C7_03350C_A	C7_03350C_A	Putative aldose reductase; protein level decreases in stationary phase cultures; Spider biofilm repressed
Q5A934	-0.137509	1.07703e-09	C1_01110C_A	ZPR1	Protein with putative zinc finger; regulated by Gcn4p; repressed in response to amino acid starvation (3-aminotriazole treatment); upregulation correlates with clinical development of fluconazole resistance
Q59UF7	-0.136936	0.000888276	CR_03170W_A	DPS1-1	Putative tRNA-Asp synthetase; genes encoding ribosomal subunits, translation factors, tRNA synthetases are downregulated upon phagocytosis by murine macrophage; protein enriched in stationary phase yeast cultures
Q5AJZ5	-0.135921	0.0293532	C5_05310W_A	PRE1	Putative beta 4 subunit of the 20S proteasome; Rim101-induced at acid pH; flucytosine induced; amphotericin B repressed
Q5A389	-0.13369	0.0114771	CR_08150W_A	RPS20	Putative ribosomal protein; repressed upon phagocytosis by murine macrophage; transcript positively regulated by Tbf1; Spider biofilm repressed
A0A1D8PNI6	-0.132901	0.0469358	C5_02760W_A	CKB2	Regulatory subunit of protein kinase CK2 (casein kinase II), beta' subunit; null mutants are hypersensitive to caspofungin
A0A1D8PF53	-0.131547	0.0116062	C1_11540C_A	CTA3	Protein similar to S. cerevisiae Ede1p, which is involved in endocytosis; activates transcription in 1-hybrid assay in S. cerevisiae
Q5AG86	-0.131076	7.32557e-05	C5_02730C_A	C5_02730C_A	Ortholog(s) have role in protein maturation by iron-sulfur cluster transfer, tRNA wobble uridine modification and CIA complex, cytosol, nucleus localization
A0A1D8PMV9	-0.130919	2.53563e-09	C5_00110C_A	THS1	Putative threonyl-tRNA synthetase; transcript regulated by Mig1 and Tup1; repressed upon phagocytosis by murine macrophages; stationary phase enriched protein; Spider biofilm repressed
A0A1D8PNP6	-0.130687	0.00280157	C5_03550W_A	C5_03550W_A	Ortholog(s) have Ran GTPase binding, structural constituent of nuclear pore activity
A0A1D8PH84	-0.12871	0.0422072	C2_04700C_A	C2_04700C_A	Putative ortholog of S. cerevisiae Utp30; a U3-containing 90S preribosome complex protein; Hap43-induced; Spider biofilm induced
Q5AME2	-0.125564	1.06404e-07	C4_00890W_A	ARO1	Putative pentafunctional arom enzyme; required for aromatic amino acid biosynthesis; involved in cell wall integrity and formation of biofilm; fungal-specific (no human or murine homolog); Gcn2p-, Gcn4p-regulated
Q5AI00	-0.123554	0.00630505	C1_03500W_A	YPT1	Functional homolog of S. cerevisiae Ypt1p, which is an essential small Ras-type GTPase involved in protein secretion at ER-to-Golgi; dominant-negative mutation causes SAP secretion defect and accumulation of intracellular secretory vesicles
A0A1D8PN11	-0.12323	0.00429339	C5_00750C_A	C5_00750C_A	Predicted protein tyrosine phosphatase; rat catheter biofilm induced
Q5A4M2	-0.121231	1.86196e-05	C6_01670W_A	MAE1	Malic enzyme, mitochondrial; transcription regulated by Mig1, Tup1; colony morphology-related gene regulation by Ssn6; Hap43-repressed; Spider biofilm repressed
A0A1D8PNA3	-0.121013	0.0344295	C5_01870W_A	C5_01870W_A	Ortholog(s) have acetyltransferase activator activity, peptide alpha-N-acetyltransferase activity, ribosome binding activity
Q5A6P2	-0.12077	0.000131699	CR_04240C_A	CR_04240C_A	Ortholog of S. cerevisiae Kre33; essential; S. cerevisiae ortholog is essential and is required for biogenesis of the small ribosomal subunit
A0A1D8PKD5	-0.1207	0.00875747	C3_06060W_A	ELP3	Predicted histone acetyltransferase; role in regulation of transcription, tRNA wobble uridine modification; Spider biofilm induced
P87206	-0.118441	0.00318839	C1_01350C_A	TIF	Translation initiation factor; upregulated in highly virulent strain compared to less virulent strain; antigenic in human; flucytosine induced; downregulated upon phagocytosis by macrophages; Spider biofilm repressed
A0A1D8PFG4	-0.11821	0.00597921	C1_12390C_A	RPL27A	Ribosomal protein L27; Spider biofilm repressed
A0A1D8PRJ1	-0.117437	0.0466175	C7_04210C_A	C7_04210C_A	Protein similar to Aspergillus CYSK O-acetylserine sulfhydrylase, suggesting that C. albicans uses an O-acetyl-serine (OAS) pathway of sulfur assimilation; upregulated in biofilm; protein level decreases in stationary phase cultures
A0A1D8PR80	-0.117238	0.000332285	C7_02780W_A	C7_02780W_A	Putative Ran guanyl-nucleotide exchange factor; probable signal transducer; Spider biofilm repressed
Q59S59	-0.116443	0.0230098	C6_02380W_A	C6_02380W_A	Putative mitochondrial ATP-dependent RNA helicase of the DEAD-box family, transcription is activated in the presence of elevated CO2
A0A1D8PMT6	-0.115563	0.0279967	C5_00080C_A	C5_00080C_A	Epsilon-COP subunit of the coatomer; regulates retrograde Golgi-to-ER protein traffic; Spider biofilm repressed
Q5AP79	-0.115319	0.00741905	C1_10160W_A	MIR1	Putative mitochondrial phosphate transporter; caspofungin repressed; expression is increased in a fluconazole-resistant isolate; induced upon adherence to polystyrene
A0A1D8PD39	-0.113974	0.0416343	C1_03780C_A	HMG1	HMG-CoA reductase; enzyme of sterol pathway; inhibited by lovastatin; gene not transcriptionally regulated in response to lovastatin and fluconazole
Q59WW7	-0.110863	0.013628	C6_00850W_A	C6_00850W_A	Putative glutathione peroxidase; induced by peroxide, exposure to neutrophils and macrophage blood fractions; repressed during infection of macrophages; Spider biofilm induced; flow model biofilm repressed
A0A1D8PGW9	-0.110703	0.0193378	C2_03700W_A	C2_03700W_A	Ortholog(s) have protein-N-terminal asparagine amidohydrolase activity, protein-N-terminal glutamine amidohydrolase activity and role in N-terminal protein amino acid modification, protein catabolic process
Q59MU1	-0.110104	0.0370523	CR_06840W_A	CR_06840W_A	Ortholog(s) have U3 snoRNA binding, rRNA binding activity and role in maturation of SSU-rRNA from tricistronic rRNA transcript (SSU-rRNA, 5.8S rRNA, LSU-rRNA), ribosomal small subunit biogenesis
A0A1D8PCT0	-0.109813	4.62995e-05	C1_02420C_A	GSC1	Essential beta-1,3-glucan synthase subunit; gsc1 allele determines resistance/sensitivity to echinocandins; 16 predicted membrane-spanning regions; mRNA abundance declines after yeast-to-hypha transition; Spider biofilm induced
A0A1D8PI19	-0.107971	0.00199966	C2_08140C_A	PHM7	Putative transporter, possibly involved in ion homeostasis, drug tolerance, filamentous growth, virulence; fungal-specific; Hog1-repressed; repressed by 17-beta-estradiol, ethynyl estradiol; Hap43-induced; Spider biofilm induced
A0A1D8PTF4	-0.105681	0.0398632	CR_07190W_A	CR_07190W_A	Ortholog(s) have GTPase activator activity and role in establishment or maintenance of actin cytoskeleton polarity, small GTPase mediated signal transduction
A0A1D8PDM9	-0.104866	0.0367897	C1_05770C_A	PRC3	Putative carboxypeptidase Y precursor; transcript regulated by Nrg1 and Mig1; regulated by Gcn2 and Gcn4
A0A1D8PS68	-0.101443	0.0251046	CR_02420W_A	CR_02420W_A	Ortholog(s) have small ribosomal subunit rRNA binding activity
Q59SM8	-0.100055	0.0491409	CR_07010W_A	MIS11	Predicted mitochondrial C1-tetrahydrofolate synthase precursor; putative protein of glycine catabolism; repressed by Efg1; fluconazole-induced; stationary phase enriched protein; rat catheter and Spider biofilm repressed
Q5AML1	-0.099931	0.000784015	C4_01490W_A	NIP1	Putative translation initiation factor; mutation confers hypersensitivity to roridin A and verrucarin A; genes encoding ribosomal subunits, translation factors, and tRNA synthetases are downregulated upon phagocytosis by murine macrophage
P43076	-0.0996241	0.0244189	C4_04530C_A	PHR1	Cell surface glycosidase; may act on cell-wall beta-1,3-glucan prior to beta-1,6-glucan linkage; role in systemic, not vaginal virulence (neutral, not low pH); high pH or filamentation induced; Bcr1-repressed in RPMI a/a biofilm
A0A1D8PPI6	-0.0990417	0.0239055	C6_01070C_A	CIP1	Possible oxidoreductase; transcript induced by cadmium but not other heavy metals, heat shock, yeast-hypha switch, oxidative stress (via Cap1), or macrophage interaction; stationary phase enriched protein; Spider biofilm induced
A0A1D8PH72	-0.098539	0.000574989	C2_04570W_A	C2_04570W_A	Ortholog(s) have role in nuclear division, rRNA processing, ribosomal large subunit biogenesis and nuclear periphery, nucleolus, preribosome, large subunit precursor localization
Q5ALU3	-0.0955657	0.0212438	C2_01720C_A	C2_01720C_A	Ortholog(s) have copper ion binding activity, role in mitochondrial respiratory chain complex IV assembly and extrinsic component of mitochondrial inner membrane, mitochondrial intermembrane space localization
Q5A884	-0.0954695	0.00201578	CR_01100C_A	CR_01100C_A	Ortholog(s) have role in mitochondrial respiratory chain complex assembly and cytoplasm, mitochondrion localization
A0A1D8PMP5	-0.0948461	0.0340961	C4_06840W_A	C4_06840W_A	Has domain(s) with predicted sequence-specific DNA binding activity
A0A1D8PGU4	-0.0948109	0.0460683	C2_03300W_A	HEM2	Putative porphobilinogen synthase; induced in high iron; protein level decrease in stationary phase cultures; Spider biofilm repressed
A0A1D8PE37	-0.0940165	5.48987e-06	C1_07710C_A	ADE4	Putative phosphoribosylpyrophosphate amidotransferase; flucytosine induced
A0A1D8PFE6	-0.0927641	0.0304544	C1_12550C_A	CDC54	Putative pre-replication complex helicase subunit; transcript regulated by Nrg1 and Mig1; periodic mRNA expression, peak at cell-cycle M/G1 phase; Hap43-induced
A0A1D8PMN9	-0.0925632	0.00148932	C4_06830C_A	CCT6	Putative cytosolic chaperonin Cct ring complex subunit; mutation confers hypersensitivity to cytochalasin D; GlcNAc-induced protein; Spider biofilm repressed
A0A1D8PNS3	-0.0899171	0.00250425	C5_03760C_A	MTR10	Putative importin; member of a family of fungal-specific nuclear importins; Mig1-regulated
A0A1D8PIS5	-0.0895483	0.00877126	C2_10340W_A	HEM4	Putative uroporphyrinogen III synthase; induced in high iron or elevated CO2; alkaline, Hap43-repressed
A0A1D8PD11	-0.0878954	0.0248643	C1_03510C_A	C1_03510C_A	Protein of unknown function; present in exponential and stationary phase yeast; identified in extracts from biofilm and planktonic cells; flow model biofilm induced gene; GlcNAc-induced protein
Q5AI56	-0.0854014	0.0286985	C1_03060C_A	TSR2	Protein with a predicted role in pre-rRNA processing; repressed by prostaglandins
A0A1D8PJ10	-0.0839272	0.0369791	C3_00850C_A	C3_00850C_A	Ortholog(s) have role in eisosome assembly and eisosome, membrane raft localization
A0A1D8PF16	-0.0802391	0.0236854	C1_11070W_A	PET127	Protein with a predicted role in 5'-end processing of mitochondrial RNAs; ortholog of S. cerevisiae Pet127; Hap43-induced; rat catheter and Spider biofilm induced
P83776	-0.0798844	1.18537e-05	CR_04510W_A	HXK2	Hexokinase II; antigenic in humans; repressed by human neutrophils; Efg1-regulated; fluconazole-induced; gene regulation by Ssn6; present in exponential and stationary growth phase; flow model biofilm induced; Spider biofilm repressed
Q59WI7	-0.078648	0.0106145	C1_11000C_A	C1_11000C_A	Protein with a role in nucleolar integrity and processing of pre-rRNA; mutation confers hypersensitivity to 5-fluorocytosine (5-FC), 5-fluorouracil (5-FU), and tubercidin (7-deazaadenosine); Hap43-induced; Spider biofilm induced
Q5A762	-0.0786021	0.00239218	C1_08210C_A	MLT1	Vacuolar membrane transporter; MRP subfamily of ABC family; may transport organic anions conjugated to glutathione, glucuronate, or sulfate; needed for virulence in mouse peritonitis; Spider biofilm induced; flow model biofilm repressed
A0A1D8PRI4	-0.0758879	0.0381907	C7_04030C_A	KAP120	Putative karyopherin; mutation confers hypersensitivity to cytochalasin D
A0A1D8PSK2	-0.0750505	0.0356029	CR_03770C_A	RPS30	Putative 40S ribosomal protein S30; colony morphology-related gene regulation by Ssn6; rat catheter biofilm repressed
Q5A8K2	-0.0745669	0.00172734	C6_03720W_A	ALA1	Alanyl-tRNA synthetase; translational regulation generates cytoplasmic and mitochondrial forms; Gcn4p-regulated; repressed by amino acid starvation (3-AT); translation-related genes downregulated upon phagocytosis by murine macrophages
A0A1D8PI03	-0.0729718	0.00392741	C2_07920W_A	C2_07920W_A	Ortholog(s) have diphthine methylesterase activity, role in endocytic recycling, peptidyl-diphthamide biosynthetic process from peptidyl-histidine and cytoplasm, endosome localization
A0A1D8PMP9	-0.0725418	0.0399869	C4_06850C_A	C4_06850C_A	Ortholog(s) have mRNA binding, metalloaminopeptidase activity and role in negative regulation of gene expression, protein initiator methionine removal involved in protein maturation
P0CY35	-0.0725299	0.0279017	C2_08370C_A	TEF1	Translation elongation factor 1-alpha; at cell surface; binds human plasminogen; macrophage/pseudohyphal-induced; induced in RHE model of oral candidiasis, in clinical oral candidiasis isolates; possibly essential; Spider biofilm repressed
A0A1D8PRE8	-0.0684155	0.00290833	C7_03540C_A	ENP2	Putative nucleolar protein; essential; heterozygous mutation confers resistance to 5-fluorocytosine (5-FC), 5-fluorouracil (5-FU), and tubercidin (7-deazaadenosine); Hap43-induced; Spider biofilm induced
O43101	-0.0676531	0.0122943	C1_10620W_A	C1_10620W_A	Ortholog(s) have pseudouridine synthase activity
Q5A2T2	-0.067136	0.0136761	C2_08000C_A	KRE30	YEF3-subfamily ABC family protein; predicted not to be a transporter; repressed in core stress response; mutation confers hypersensitivity to amphotericin B
A0A1D8PQQ5	-0.0660399	0.0122902	C7_00960W_A	RPS18	Predicted ribosomal protein; repressed upon phagocytosis by murine macrophage; repressed by nitric oxide; Hap43-induced; Spider biofilm repressed
A0A1D8PTU3	-0.0660095	0.00554343	CR_08990C_A	SLP3	Plasma membrane protein implicated in stress response; similar to stomatin mechanoreception proteins; overexpression induces apoptotic-like cell death; absent from hyphal cells; induced by Rgt1; rat catheter and Spider biofilm induced
Q59MT3	-0.063996	0.00215943	CR_06770C_A	CR_06770C_A	Putative L-azetidine-2-carboxylic acid acetyltransferase; mutants are viable
Q5AK64	-0.0626184	0.0268907	C5_04710W_A	C5_04710W_A	Ortholog(s) have glutaminyl-tRNA synthase (glutamine-hydrolyzing) activity and role in endoplasmic reticulum organization, glutaminyl-tRNAGln biosynthesis via transamidation
A0A1D8PF88	-0.06217	0.00704631	C1_11760C_A	C1_11760C_A	Protein of unknown function; Spider biofilm repressed
Q5AHY9	-0.0614645	0.0149065	C1_03640C_A	HFL1	HAP5-like; ortholog of S. cerevisiae Dpb3; third-largest subunit of DNA polymerase II (DNA polymerase epsilon); phosphorylated protein; mutants have a growth defect
Q5ADY0	-0.0590611	0.0187152	C3_07740W_A	C3_07740W_A	Ortholog of S. cerevisiae : SGM1, C. glabrata CBS138 : CAGL0M00462g, C. dubliniensis CD36 : Cd36_87610, C. parapsilosis CDC317 : CPAR2_808090 and C. auris B8441 : B9J08_004134
A0A1D8PH21	-0.0562847	0.0193971	C2_03960W_A	RPL39	Ribosomal protein L39; transcript induced upon germ tube formation; colony morphology-related gene regulation by Ssn6; Hap43-induced
A0A1D8PU06	-0.0534206	0.0384861	CR_09600C_A	YKE2	Possible heterohexameric Gim/prefoldin protein complex subunit; role in folding alpha-tubulin, beta-tubulin, and actin; transcript induced by yeast-to-hypha switch; regulated by Nrg1, Tup1; Spider and flow model biofilm induced
A0A1D8PDL7	-0.0532247	0.0185696	C1_05630C_A	C1_05630C_A	Putative karyopherin beta; repressed by nitric oxide
A0A1D8PNF5	-0.0522544	0.000840757	C5_02490C_A	TIF5	Putative translation initiation factor; repressed upon phagocytosis by murine macrophage; Spider biofilm repressed
Q5A785	-0.0520601	0.0433882	C1_08050W_A	C1_08050W_A	Protein of unknown function; Hap43-repressed gene; repressed by nitric oxide
Q59W63	-0.0506924	0.000270361	C1_11420W_A	KRR1	Putative nucleolar protein; repressed benomyl treatment or in an azole-resistant strain that overexpresses MDR1; F-12/CO2 early biofilm induced
A0A1D8PQM4	-0.0490627	3.5045e-11	C7_00570W_A	RPA135	Putative RNA polymerase I subunit A135; repressed by prostaglandins
A0A1D8PGV7	-0.0486779	0.0304931	C2_03280W_A	NSP1	Essential component of the nuclear pore complex; sumoylation target; stationary phase enriched protein; rat catheter biofilm repressed
Q59PZ6	-0.047267	0.000841361	CR_06700C_A	SOL3	Putative 6-phosphogluconolactonase; present in exponential and stationary growth phase yeast cultures; macrophage-downregulated protein; Spider biofilm repressed
Q5AI14	-0.0462981	0.0348109	C1_03380W_A	TPS2	Trehalose-6-phosphate (Tre6P) phosphatase; mutant heat sensitive, accumulates Tre6P, decreased mouse virulence; possible drug target; 2 conserved phospohydrolase motifs; no mammalian homolog; Hap43-repressed; flow model biofilm induced
Q5AA47	-0.0442924	0.0306114	C1_06080C_A	ARC35	Putative ARP2/3 complex subunit; shows colony morphology-related gene regulation by Ssn6p; mutation confers hypersensitivity to cytochalasin D
Q5AK59	-0.0438613	0.000349591	C5_04750C_A	HAS1	Functional homolog of S. cerevisiae Has1p, which is a nucleolar protein of the DEAD-box ATP-dependent RNA helicase family that is involved in biogenesis of the ribosome, particularly the small (40S) subunit; caspofungin-downregulated
Q5ACM9	-0.0431486	0.0104551	CR_10370W_A	HCR1	Putative translation initiation factor; repressed upon phagocytosis by murine macrophage; Spider biofilm repressed
Q5A5S7	-0.0415078	0.00781879	C2_10470C_A	C2_10470C_A	Ortholog(s) have phosphatidylinositol-3-phosphate binding activity
Q5AGD1	-0.0410983	0.0448448	C5_02400W_A	C5_02400W_A	Ortholog of S. cerevisiae YLR118C (alias Apt1); acyl-protein thioesterase responsible for depalmitoylation of Gpa1 in S. cerevisiae; regulated by Gcn4; repressed in response to amino acid starvation (3AT); rat catheter biofilm repressed
A0A1D8PC77	-0.0405163	0.0395272	C1_00440W_A	UBP6	Putative ubiquitin-specific protease of the 26S proteasome; oxidative stress-induced via Cap1p
A0A1D8PEB4	-0.0382971	0.00348704	C1_08420W_A	GCR3	Functional homolog of S. cerevisiae Gcr3, which acts in regulation of glycolytic genes; no intron predicted, in contrast to intron in S. cerevisiae GCR3 gene
A0A1D8PMJ1	-0.0378256	0.0125442	C4_06210C_A	C4_06210C_A	Putative GTPase; heterozygous null mutant exhibits resistance to parnafungin in the C. albicans fitness test; Hap43p-induced gene
Q5APT8	-0.037484	0.0375637	C1_10030W_A	DBP3	Putative ATP-dependent DEAD-box RNA helicase; Hap43-induced; repressed by prostaglandins; Spider biofilm induced
A0A1D8PK61	-0.0372279	0.000178611	C3_05200W_A	RPS19A	Putative ribosomal protein S19; protein level decreases in stationary phase cultures; Spider biofilm repressed
Q5A7M2	-0.036882	0.00439191	C3_00250C_A	TIM44	Protein involved in transport across membranes; Spider biofilm repressed
Q3MNT0	-0.035984	0.016789	C7_04300W_A	SPT6	Putative transcription elongation factor; transposon mutation affects filamentous growth; transcript induced in an RHE model of oral candidiasis and in clinical isolates from oral candidiasis
Q5AMN0	-0.0348764	0.00501621	C4_01770W_A	POL30	Proliferating cell nuclear antigen (PCNA), forms homotrimeric sliding clamp for DNA polymerases; RNA abundance regulated by tyrosol, cell density; induced by flucytosine, interaction with macrophages; stationary phase enriched protein
A0A1D8PHY2	-0.0346612	0.0196343	C2_07680W_A	C2_07680W_A	Ortholog(s) have structural constituent of ribosome activity and mitochondrial large ribosomal subunit localization
Q59X53	-0.0340176	0.0279772	C2_09160W_A	C2_09160W_A	Ortholog(s) have role in U1 snRNA 3'-end processing, U4 snRNA 3'-end processing and U5 snRNA 3'-end processing, more
A0A1D8PJ59	-0.0335511	0.0167946	C3_00950C_A	C3_00950C_A	Putative peptidyl-prolyl cis-trans isomerase
A0A1D8PQL1	-0.030409	4.62076e-06	C7_00490C_A	C7_00490C_A	Putative AdoMet-dependent proline methyltransferase; Hap43-induced; required for normal flow model biofilm growth; Spider biofilm repressed
Q59WG6	-0.0285238	0.00618305	C1_10820C_A	C1_10820C_A	Putative aspartyl aminopeptidase; stationary phase enriched protein; mutation confers hypersensitivity to 5-fluorouracil (5-FU); Hog1-induced; planktonic growth-induced; rat catheter and Spider biofilm repressed
A0A1D8PSV5	-0.0252276	0.011082	CR_04810W_A	RPS3	Ribosomal protein S3; Hog1, Hap43-induced; grepressed upon phagocytosis by murine macrophage; present in exponential and stationary phase cells; Spider biofilm repressed
Q59R21	-0.0241398	0.0213546	C7_03650W_A	C7_03650W_A	Ortholog(s) have histidinol-phosphatase activity and role in histidine biosynthetic process
Q5ANI8	-0.0183501	0.00817138	C3_04560W_A	MAK21	Putative 66S pre-ribosomal particle subunit; mutation confers hypersensitivity to tubercidin (7-deazaadenosine)
Q5A5S8	-0.018081	0.00449918	C2_10460C_A	C2_10460C_A	Ortholog(s) have methylenetetrahydrofolate reductase (NAD(P)H) activity and role in methionine biosynthetic process, one-carbon metabolic process
A0A1D8PH91	-0.0166679	0.000778881	C2_04790C_A	C2_04790C_A	Ortholog(s) have structural constituent of ribosome activity, role in mitochondrial translation, mitochondrial translational initiation and mitochondrial small ribosomal subunit localization
A0A1D8PS79	-0.0158631	0.020225	CR_02360W_A	IDP2	Isocitrate dehydrogenase; white-opaque switch regulated; morphology-regulation by Ssn6; protein in exponential and stationary phase yeast; Hap43-repressed; Spider biofilm repressed by Bcr1, Tec1, Ndt80, Rob1, Brg1; Spider biofilm induced
Q5A7P7	-0.0152151	0.00737942	C3_00460W_A	ATP5	Putative F0-ATP synthase FO subunit B; caspofungin repressed; protein level decreased in stationary phase yeast cultures; Spider biofilm repressed
A0A1D8PRR9	-0.0150997	0.0038343	CR_00520C_A	CRM1	Functional homolog of S. cerevisiae Crm1, which acts in protein nuclear export; predicted to be resistant to antifungal drug leptomycin B; partially suppresses signal transduction defects of S. cerevisiae ste20 mutant
A0A1D8PG37	-0.0131688	0.0102591	C2_00400C_A	C2_00400C_A	Putative NADH dehydrogenase; repressed by nitric oxide, Hap43p-repressed
A0A1D8PI26	-0.0118674	0.0147279	C2_07930C_A	VRP1	Verprolin-related protein involved in actin cytoskeleton organization and polarized morphogenesis; interacts with Wal1p and Myo5p; downregulated upon adherence to polystyrene
Q5AAJ8	-0.0104318	0.0116062	CR_00410W_A	RTT109	Histone acetyltransferase, mutants are sensitive to DNA damage, show decreased virulence in mice, decreased white-to-opaque switching and increased susceptibility to killing by macrophages
A0A1D8PN22	-0.00737107	0.0278839	C5_01020C_A	C5_01020C_A	Predicted non-catalytic subunit of N-terminal acetyltransferase; Spider biofilm induced
Q59R18	-0.00703562	0.0246279	C7_03670W_A	DED81	Putative tRNA-Asn synthetase; genes encoding ribosomal subunits, translation factors, tRNA synthetases are downregulated upon phagocytosis by murine macrophage; protein enriched in stationary phase yeast cultures
A0A1D8PKI3	-0.00633453	0.00473083	C3_06490W_A	C3_06490W_A	Putative protein of unknown function; Hap43p-repressed gene; ortholog of S. cerevisiae YJL218W
A0A1D8PI17	-0.00583954	0.0415199	C2_07570W_A	RNR22	Putative ribonucleoside diphosphate reductase;colony morphology-related gene regulation by Ssn6; transcript regulated by tyrosol and cell density; Hap43-repressed; Spider biofilm induced
Q9HGT6	-0.00367042	0.0366126	C3_02780W_A	SES1	Seryl-tRNA synthetase; charges the tRNA that recognizes the CUG codon, which typically specifies Leu, but specifies Ser in C. albicans; complements S. cerevisiae ses1 mutant viability; soluble protein in hyphae; macrophage-regulated
A0A1D8PCQ5	-0.0030799	0.0233667	C1_02330C_A	C1_02330C_A	Ribosomal 60S subunit protein; Spider biofilm repressed
Q5AB87	0.00221693	0.000351195	C1_00180W_A	RPL16A	Ribosomal protein; transposon mutation affects filamentous growth; repressed upon phagocytosis by murine macrophages; Hap43-induced; Spider biofilm repressed
Q59ZX6	0.00451778	7.38167e-05	C1_14080W_A	C1_14080W_A	Nucleolar protein; component of the small subunit processome containing the U3 snoRNA; involved in pre-18S rRNA processing; flow model biofilm repressed
A0A1D8PGJ9	0.00485025	0.0236346	C2_02310W_A	C2_02310W_A	Plasma membrane-associated protein identified in detergent-resistant membrane fraction (possible lipid raft component); repressed by nitric oxide; predicted transmembrane helix
A0A1D8PI15	0.00496766	0.0141264	C2_08040C_A	RPS10	Ribosomal protein S10; downregulated in the presence of human whole blood or PMNs; Spider biofilm repressed
A0A1D8PCY8	0.0113836	0.0367802	C1_03300C_A	MAS1	Putative mitochondrial processing protease; Hap43-repressed; transcript regulated by Nrg1; oxidative stress-induced via Cap1
A0A1D8PF08	0.014619	0.00904176	C1_11060C_A	RPL2	Putative 60S ribosomal protein L2; Hap43-induced gene; repressed in infected rabbit kidney in SC5314, but not NGY152, strain background; Spider biofilm repressed
A0A1D8PQN6	0.0148331	0.0369482	C7_00830C_A	C7_00830C_A	Putative eIF4E-associated protein;, accelerates mRNA degradation by promoting decapping; Spider biofilm repressed
A0A1D8PJD7	0.0198377	0.00671047	C3_01990W_A	RNA1	Putative GTPase-activating protein; protein level decreases in stationary phase cultures; Spider biofilm repressed
Q5AF54	0.0199137	0.00429352	C4_02480C_A	TIM13	Predicted mitochondrial intermembrane space protein with a role in protein import into mitochondria
A0A1D8PD47	0.0207489	0.0295557	C1_03760C_A	STR2	Ortholog(s) have cystathionine gamma-synthase activity and role in sulfur compound metabolic process, transsulfuration
Q5AGF6	0.0242572	0.038862	C5_02170C_A	GCD11	Gamma subunit of translation initiation factor eIF2; involved in identification of the start codon; likely essential for growth, based on an insertional mutagenesis strategy; Spider biofilm repressed
A0A1D8PRE9	0.026314	0.0270664	C7_03720C_A	HIS7	Putative imidazole glycerol phosphate synthase; histidine biosynthesis; no human/murine homolog; transcription induced by histidine starvation; regulated by Gcn2p and Gcn4p; higher protein level in stationary phase
A0A1D8PN12	0.0264482	0.0172114	C5_00890C_A	GIT2	Putative glycerophosphoinositol permease; fungal-specific; repressed by alpha pheromone in SpiderM medium; Hap43-repressed; Spider biofilm induced
A0A1D8PQQ7	0.0276269	0.0155663	C7_01030C_A	C7_01030C_A	Ortholog(s) have role in maturation of SSU-rRNA from tricistronic rRNA transcript (SSU-rRNA, 5.8S rRNA, LSU-rRNA) and nucleus, preribosome, small subunit precursor localization
Q5A863	0.0284465	0.0368145	CR_00900W_A	TRM1	Putative N2,N2-dimethylguanine tRNA methyltransferase; induced upon adherence to polystyrene
A0A1D8PP21	0.0305768	0.0037627	C5_04700C_A	MES1	Cytoplasmic methionyl-tRNA synthetase; zinc-binding motif; ribosomal subunits, translation factors, tRNA synthetases are downregulated upon phagocytosis by murine macrophage; protein present in exponential and stationary phase yeast
Q5AGX8	0.0317954	0.0307391	C7_01640W_A	LAT1	Putative dihydrolipoamide acetyltransferase component (E2) of pyruvate dehydrogenase complex; sumoylation target; Spider biofilm repressed
Q59T44	0.0320004	0.0106703	C2_05610C_A	RPS8A	Small 40S ribosomal subunit protein; induced by ciclopirox olamine; repressed upon phagocytosis by murine macrophage; 5'-UTR intron; Hap43-induced; Spider biofilm repressed
Q5ANP6	0.0332185	0.0363744	C3_04090W_A	SBP1	Similar to RNA binding proteins; downregulated upon adherence to polystyrene; stationary-phase enriched protein
Q5A0M4	0.0334587	0.00088039	C2_03100W_A	EFT2	Elongation Factor 2 (eEF2); GTPase; essential; highly expressed; target of sordarin antifungals; antigenic in human/mouse; lacks site for regulatory phosphorylation by eEF2 kinase; GCN-regulated; higher protein amount in stationary phase
Q5AEL8	0.0345077	0.0234311	C3_02600C_A	SLC1	Putative fatty acyltransferase; protein repressed during the mating process
A0A1D8PFV7	0.0348171	0.00306783	C1_14290C_A	MDG1	Ortholog(s) have role in pheromone-dependent signal transduction involved in conjugation with cellular fusion and membrane raft, plasma membrane localization
Q9P940	0.0348824	0.00273014	C3_07440W_A	TPI1	Triose-phosphate isomerase; antigenic in mouse/human; mutation affects filamentation; macrophage-repressed; protein in exponential and stationary growth phase yeast; possibly essential; flow model biofilm induced; Spider biofilm repressed
A0A1D8PRI6	0.0381639	0.00459838	C7_04140C_A	C7_04140C_A	Ortholog(s) have unfolded protein binding activity
A0A1D8PMU8	0.0399375	0.0179109	C5_00150C_A	C5_00150C_A	Ortholog(s) have nuclear import signal receptor activity, nuclear localization sequence binding, protein-containing complex binding activity
Q59Y21	0.0437055	0.00696813	C2_08500W_A	RSP5	Putative NEDD4 family E3 ubiquitin ligase; induced during infection of murine kidney, compared to growth in vitro; has murine homolog; possibly an essential gene, disruptants not obtained by UAU1 method
A0A1D8PTX1	0.0437776	0.0103971	CR_08950W_A	ARP2	Component of the Arp2/3 complex; required for virulence, hyphal growth, cell wall/cytoskeleton organization, not for endocytosis; mutation confers hypersensitivity to cytochalasin D; regulated by Gcn2 and Gcn4; Spider biofilm repressed
Q5A782	0.0479269	0.0105961	C1_08090C_A	FUN12	Functional homolog of S. cerevisiae Fun12 translation initiation factor eIF5B; genes encoding ribosomal subunits, translation factors, and tRNA synthetases are downregulated upon phagocytosis by murine macrophage
Q5AAV3	0.0481035	0.00178481	C1_07000W_A	MEF2	Putative mitochondrial translation elongation factor; caspofungin induced
A0A1D8PEY9	0.0504989	0.0474029	C1_10870W_A	RPS17B	Ribosomal protein 17B; downregulated upon phagocytosis by murine macrophages; Hap43-induced; Spider biofilm repressed
A0A1D8PEM5	0.055049	0.0023783	C1_09630W_A	IDH1	Putative mitochondrial NAD-isocitrate dehydrogenase subunit 1; soluble protein in hyphae; protein level decrease in stationary phase cultures
Q5A8I4	0.0551626	0.0258598	C6_03890C_A	SKI8	Ortholog(s) have role in cellular protein-containing complex assembly, nuclear-transcribed mRNA catabolic process, 3'-5' exonucleolytic nonsense-mediated decay and nuclear-transcribed mRNA catabolic process, more
Q59R20	0.0606408	0.0446735	C7_03660C_A	C7_03660C_A	Protein with similarity to amino acid-tRNA ligase; stationary phase enriched protein; GlcNAc-induced protein
Q5A015	0.0625114	0.0418715	CR_03740C_A	CR_03740C_A	Protein similar to S. cerevisiae Fmn1p, which is riboflavin kinase; predicted Kex2p substrate; Hap43p-repressed gene
Q59RQ6	0.0639457	0.000960225	CR_07400C_A	LPD1	Putative dihydrolipoamide dehydrogenase; soluble in hyphae; antigenic in human oral infection and murine systemic infection; macrophage-induced protein; protein present in exponential and stationary phase yeast cultures; Hap43p-repressed
Q5AAW5	0.0658543	0.000296563	C1_07090C_A	C1_07090C_A	Ortholog(s) have 3'-5'-exoribonuclease activity
A0A1D8PFR4	0.0676302	0.0421769	C1_13700W_A	ACT1	Actin; gene has intron; transcript regulated by growth phase, starvation; at polarized growth site in budding and hyphal cells; required for wild-type Cdc42 localization; unprocessed N terminus; Hap43-induced; Spider biofilm repressed
A0A1D8PPA8	0.0680731	0.000147432	C6_00210W_A	C6_00210W_A	Putative 2-aminoadipate transaminase; rat catheter and Spider biofilm repressed
A0A1D8PUB0	0.0686353	0.00579652	CR_10650W_A	LTV1	Putative GSE complex component; repressed by prostaglandins
O74261	0.0686547	0.000710345	CR_06490C_A	HSP60	Heat shock protein; soluble in hyphae; regulated by Nrg1 and by iron; induced in high iron; heavy metal (cadmium) stress-induced; sumoylation target; protein present in exponential and stationary phase cells; Hap43-repressed
Q59KV5	0.0697081	0.0232518	C2_06700W_A	AMO2	Protein similar to A. niger predicted peroxisomal copper amino oxidase; mutation confers hypersensitivity to toxic ergosterol analog; F-12/CO2 early biofilm induced
Q59US8	0.0738322	0.000277351	C4_00170W_A	C4_00170W_A	Ortholog of S. cerevisiae Dif1; which regulates nuclear localization of Rnr2 and Rnr4; colony morphology-related gene regulation by Ssn6; induced in cyr1 mutant; Spider biofilm induced
A0A1D8PL99	0.0738708	8.00332e-05	C4_01270W_A	RPS6A	Ribosomal protein 6A; localizes to cell surface of yeast cells but not hyphae; repressed upon phagocytosis by murine macrophage; possibly essential; Hap43-induced; Spider biofilm repressed
A0A1D8PN05	0.0744128	0.0120799	C5_00790C_A	C5_00790C_A	Putative RNA-binding protein; transcript is upregulated in an RHE model of oral candidiasis
A0A1D8PLY4	0.0750963	0.00013698	C4_03940C_A	PYC2	Putative pyruvate carboxylase; binds biotin cofactor; repressed by Ssk1 response regulator, by benomyl treatment, or in an azole-resistant strain overexpressing MDR1; stationary phase enriched protein; flow model biofilm repressed
Q5ADM7	0.0765583	0.00606226	C3_06870W_A	TDH3	NAD-linked glyceraldehyde-3-phosphate dehydrogenase; binds fibronectin, laminin; at cell surface; antigenic in infection; farnesol-repressed; stationary phase-enriched; GlcNAc-induced; flow model biofilm induced; Spider biofilm repressed
A0A1D8PD02	0.077992	0.0125549	C1_03240W_A	C1_03240W_A	Ortholog of C. dubliniensis CD36 : Cd36_03040, C. parapsilosis CDC317 : CPAR2_108610, C. auris B8441 : B9J08_000283, Debaryomyces hansenii CBS767 : DEHA2G16500g and Pichia stipitis Pignal : PICST_32835
A0A1D8PU61	0.0786657	0.0116205	CR_10250C_A	FDH3	Glutathione-dependent formaldehyde dehydrogenase; glycine catabolism; repressed by Efg1 in yeast, not hyphal growth conditions; induced by Mnl1 under weak acid stress; Spider biofilm repressed
A0A1D8PF68	0.0802475	6.47175e-08	C1_11450C_A	SAM2	S-adenosylmethionine synthetase; localizes to surface of hyphae, not yeast cells; alkaline, Hog1-induced; farnesol-downregulated; F-12/CO2 early biofilm induced; Spider biofilm repressed
A0A1D8PQM9	0.0806272	0.00221258	C7_00550C_A	GLN4	Putative tRNA-Gln synthetase; genes encoding ribosomal subunits, translation factors, tRNA synthetases are downregulated upon phagocytosis by murine macrophage; protein present in exponential and stationary growth phase yeast cultures
A0A1D8PT27	0.0808423	0.00182396	CR_05790C_A	ACO2	Putative aconitate hydratase 2; induced in high iron; regulated by Gcn4; repressed by amino acid starvation (3-AT); protein levels decrease in stationary phase yeast; flow model and Spider biofilm repressed
Q5A750	0.0837597	0.0445742	C1_08320W_A	TKL1	Putative transketolase; localizes to surface of yeast cells, not hyphae; soluble protein in hyphae; transcript regulated by Nrg1, Mig1, and Tup1; antigenic in human or murine infection; possibly essential (by UAU1 method)
Q5A5V6	0.0881639	0.0360955	C4_04150C_A	PDB1	Putative pyruvate dehydrogenase; fluconazole-induced; protein level decreases in stationary phase cultures; Spider biofilm repressed
Q59P08	0.088706	0.0265728	C4_05390W_A	C4_05390W_A	Putative glyoxylate reductase; acts on glyoxylate and hydroxypyruvate substrates; Spider biofilm repressed
Q5AGV4	0.0895035	0.0169241	C7_01450C_A	PRT1	Putative translation initiation factor eIF3; mutation confers hypersensitivity to roridin A, verrucarin A; genes encoding ribosomal subunits, translation factors, tRNA synthetases are downregulated upon phagocytosis by murine macrophages
Q5A017	0.0904913	0.0314794	CR_03720W_A	TAL1	Transaldolase; protein present in exponential and stationary growth phase yeast cultures; oxidative stress-induced via Cap1; induced by nitric oxide independent of Yhb1p; sumoylation target; rat catheter biofilm repressed
A0A1D8PM94	0.0905643	0.0049502	C4_05130C_A	ALD6	Putative aldehyde dehydrogenase; stationary phase enriched protein; expression regulated upon white-opaque switch; rat catheter biofilm induced; rat catheter and Spider biofilm induced
A0A1D8PP43	0.0910675	0.0278117	C5_05050W_A	ADH1	Alcohol dehydrogenase; oxidizes ethanol to acetaldehyde; at yeast cell surface; immunogenic in humans/mice; complements S. cerevisiae adh1 adh2 adh3 mutant; fluconazole, farnesol-induced; flow model biofilm induced; Spider biofilm repressed
A0A1D8PCW7	0.0911465	0.0259206	C1_02920W_A	CDC73	Putative transcription elongation factor; cdc73 kap114 double transposon mutation affects filamentous growth; Spider biofilm repressed
Q59ZH9	0.091388	0.0464274	C2_05090W_A	MAK5	Putative nucleolar DEAD-box RNA helicase; oxidative stress-repressed via Cap1; repressed by prostaglandins
Q5A1E3	0.0914114	0.0307043	C4_06580W_A	CBF1	Transcription factor; binds ribosomal protein gene promoters and rDNA locus with Tbf1; regulates sulfur starvation-response, respiratory, glycolytic genes; does not bind to centromeres as does S. cerevisiae Cbf1; Spider biofilm repressed
Q5AEF2	0.0923727	0.033673	C3_03170W_A	SEC13	Putative protein transport factor; antigenic during murine systemic infection; macrophage-downregulated protein; protein level decreases in stationary phase cultures; Spider biofilm repressed
A0A1D8PQL8	0.0937015	0.00917654	C7_00620W_A	GUS1	Putative glutamine-tRNA ligase; stationary phase enriched protein; Spider biofilm repressed
Q59U85	0.0947753	0.000116357	C2_07590W_A	VMA10	Subunit G of the V1 peripheral membrane domain of the vacuolar H+-ATPase (V-ATPase); involved in vacuolar acidification; rat catheter biofilm repressed
Q59X89	0.0947805	0.0338621	CR_08060C_A	VPS21	Late endosomal Rab small monomeric GTPase involved in transport of endocytosed proteins to the vacuole; involved in filamentous growth and virulence; Spider biofilm induced
A0A1D8PDC4	0.0954962	1.29648e-06	C1_04610W_A	ATP1	ATP synthase alpha subunit; antigenic in human/mouse; at hyphal surface; ciclopirox, ketoconazole, flucytosine induced; Efg1, caspofungin repressed; may be essential; sumoylation target; stationary phase-enriched; Spider biofilm repressed
A0A1D8PGM4	0.0977613	0.00092682	C2_02450C_A	UTP22	Putative U3 snoRNP protein; Ssr1-induced; repressed by prostaglandins; heterozygous null mutant is resistant to parnafungin
A0A1D8PH18	0.0985244	0.00633146	C2_03840C_A	INO4	Transcription factor; activator that forms a heterodimer with Ino2; likely regulates genes involved in phosphatidylcholine and phosphatidylinositol biosynthesis, fatty acid beta-oxidation, and peroxisome biogenesis; gene has intron
Q5A397	0.0988092	0.0193905	CR_08090W_A	SSB1	HSP70 family heat shock protein; mRNA in yeast and germ tubes; at yeast cell surface, not hyphae; antigenic in human/mouse infection; macrophage, GCN-induced; possibly essential; sumoylation target; Hap43-induced; Spider biofilm repressed
A0A1D8PJ01	0.100609	0.0361989	C3_00720W_A	PMA1	Plasma membrane H(+)-ATPase; highly expressed, comprises 20-40% of total plasma membrane protein; levels increase at stationary phase transition; fluconazole induced; caspofungin repressed; upregulated in RHE model; Spider biofilm repressed
Q5ADW5	0.100662	0.0267884	C3_07630C_A	C3_07630C_A	Ortholog(s) have DNA binding, DNA secondary structure binding activity
Q5A0V9	0.10123	0.000837571	C4_06720W_A	NOP1	Nucleolar protein; flucytosine induced; Hap43-induced; Spider biofilm repressed
Q5A943	0.105395	0.000109923	C1_01030W_A	HMT1	Major type I protein arginine methyltransferase (PRMT); involved in asymmetric dimethylation of arginine residues; involved in nuclear export of Npl3p; Spider biofilm repressed
Q5AA23	0.107171	0.000382936	C1_05880W_A	PRN4	Protein with similarity to pirins; induced by benomyl treatment; flow model biofilm repressed
A0A1D8PS16	0.111892	0.00497215	CR_01760C_A	FRS1	Phenylalanyl-tRNA synthetase; possible role in early cell wall biosynthesis; downregulated by phagocytosis by macrophages; possibly essential gene, disruptants not obtained by UAU1 method; protein present in exponential and stationary phase
A0A1D8PQB4	0.114246	0.0270175	C6_03960W_A	C6_03960W_A	Putative dipeptidyl-peptidase III; protein detected by mass spec in exponential and stationary phase cultures; Hog1p-induced; clade-associated gene expression
Q59S45	0.11675	0.0476887	C7_01270C_A	C7_01270C_A	Ortholog(s) have DNA binding activity, role in regulation of DNA damage checkpoint and cytoplasm, nuclear chromatin, nuclear periphery localization
A0A1D8PFS4	0.116871	2.78701e-09	C1_13860C_A	GND1	6-phosphogluconate dehydrogenase; soluble in hyphae; farnesol, macrophage-induced protein; antigenic in mice; dual localization to cytosol and peroxisomes depends on alternative splicing; rat catheter and Spider biofilm repressed
A0A1D8PI95	0.117527	0.0375467	C2_08800C_A	APE3	Putative vacuolar aminopeptidase Y,; regulated by Gcn2 and Gcn4; rat catheter and Spider biofilm repressed
A0A1D8PSW6	0.117793	0.000368728	CR_04870C_A	CR_04870C_A	Trimethylaminobutyraldehyde dehydrogenase, the third enzyme of the carnitine biosynthesis pathway
A0A1D8PH52	0.118274	0.035771	C2_04310W_A	ERG10	Acetyl-CoA acetyltransferase; role in ergosterol biosynthesis; soluble in hyphae; changes in protein abundance associated with azole resistance; fluconazole or ketoconazole induced; macrophage-downregulated protein; GlcNAc-induced protein
P41797	0.12119	0.000247327	C1_13480W_A	HSP70	Putative hsp70 chaperone; role in entry into host cells; heat-shock, amphotericin B, cadmium, ketoconazole-induced; surface localized in yeast and hyphae; antigenic in host; farnesol-downregulated in biofilm; Spider biofilm induced
Q5A1D5	0.124282	0.0305772	C4_06500W_A	CDC68	Functional homolog of S. cerevisiae Cdc68, a transcription elongation factor; essential; possible drug target
A0A1D8PIF8	0.126666	0.0265648	C2_09750W_A	LEU42	Putative alpha-isopropylmalate synthase; fungal-specific; induced by human blood or polymorphonuclear cells; regulated by Gcn2 and Gcn4; stationary phase enriched protein; Spider biofilm induced
Q59W54	0.127975	0.0416747	C1_11330C_A	SMT3	SUMO, small ubiquitin-like protein; Smt3p-conjugated proteins localize to septation site and mother side of bud neck; C. albicans septins appear not to be Smt3p-modified, in contrast to S. cerevisiae septins
A0A1D8PF45	0.129929	0.00373515	C1_11360W_A	RPL37B	Ribosomal protein L37; Hap43-induced; Spider biofilm repressed
Q59KQ1	0.131822	0.0273337	CR_05220C_A	GUT1	Putative glycerol kinase; downregulated upon adherence to polystyrene; greater mRNA abundance observed in a cyr1 homozygous null mutant than in wild type
Q59S78	0.132012	0.00607417	C6_02220W_A	SAR1	Functional homolog of S. cerevisiae Sar1; which is required for ER-to-Golgi protein transport; binds GTP; similar to small GTPase superfamily proteins; gene has intron; Hap43-induced; rat catheter biofilm repressed
A0A1D8PNE5	0.132999	0.000486686	C5_02380W_A	C5_02380W_A	Protein with similarity to S. cerevisiae Ykr070w; Tn mutation affects filamentation; Hog1-repressed; colony morphology-related gene regulation by Ssn6p; induced during cell wall regeneration; possibly essential
A0A1D8PPX6	0.13425	0.0356264	C6_02560W_A	C6_02560W_A	Putative oxidoreductase; protein levels affected by URA3 expression in CAI-4 strain background; Efg1, Efh1 regulated; Rgt1-repressed; protein present in exponential and stationary growth phase yeast; rat catheter biofilm repressed
A0A1D8PJ89	0.136637	0.0457975	C3_01710C_A	PPT1	Putative serine/threonine phosphatase; induced in high iron
Q5A9D4	0.137011	7.58591e-05	CR_01470W_A	CSP37	Hyphal cell wall protein; role in progression of mouse systemic infection; predicted P-loop, divalent cation binding, N-glycosylation sites; expressed in yeast and hyphae; hyphal downregulated; stationary-phase enriched; GlcNAc-induced
Q5AGZ9	0.142832	0.0379905	C7_01810W_A	RVB2	Putative trancription modulator; RuvB-like protein family member; heterozygous null mutant displays sensitivity to virgineone
A0A1D8PPM0	0.143055	0.00185695	C6_01410C_A	OYE2	Putative NAPDH dehydrogenase; induced by nitric oxide; Spider biofilm induced
A0A1D8PCA4	0.143497	0.014773	C1_00640C_A	RPO41	Putative mitochondrial RNA polymerase; repressed in core stress response; Spider biofilm induced
A0A1D8PI00	0.146529	1.40691e-10	C2_07900W_A	GDH2	Putative NAD-specific glutamate dehydrogenase; fungal-specific; transcript regulated by Nrg1, Mig1, Tup1, and Gcn4; stationary phase enriched protein; flow model biofilm induced; Spider biofilm induced
Q59Z37	0.151317	0.000331813	C2_07080C_A	C2_07080C_A	Ortholog of C. dubliniensis CD36 : Cd36_21360, C. parapsilosis CDC317 : CPAR2_406560, C. auris B8441 : B9J08_002799 and Candida tenuis NRRL Y-1498 : CANTEDRAFT_103408
Q5ADR2	0.151576	0.00296168	C3_07220C_A	PRO2	Putative gamma-glutamyl phosphate reductase with a predicted role in proline biosynthesis; regulated by Gcn2p and Gcn4p
Q8NJN3	0.152007	0.0306381	C1_04290C_A	ACS2	Acetyl-CoA synthetase; antigenic during human and murine infection; induced by Efg1; macrophage-induced protein; soluble protein in hyphae; gene contains intron; flow model and Spider biofilm repressed
Q5AEI0	0.152389	0.000550413	C3_02950C_A	MET13	Putative methionine biosynthesis protein; ketoconazole-induced; amphotericin B repressed; Spider biofilm repressed
A0A1D8PNG9	0.153357	0.00183415	C5_02270W_A	THR4	Putative threonine synthase; protein present in exponential and stationary growth phase yeast cultures; Gcn4p-regulated; sumoylation target
A0A1D8PGU0	0.154708	0.0197503	C2_02760W_A	LHS1	Protein similar to S. cerevisiae Hsp70p; predicted Kex2p substrate; possibly essential, disruptants not obtained by UAU1 method; flow model biofilm repressed
Q59KZ1	0.155362	0.000149548	C1_04400C_A	APE2	Neutral arginine, alanine, leucine specific metallo-aminopeptidase; purified from cell wall/intracellular fractions; protein repressed during mating; Hog1, farnesol-induced; may be essential (UAU1 method); rat catheter biofilm repressed
Q5AJ71	0.156544	0.0328592	C3_01300C_A	NCE103	Carbonic anhydrase; converts of CO2 to bicarbonate; essential for virulence in host niches with limited CO2, normal white-opaque switch; Mnl1-induced in weak acid stress; Hap43-induced gene; F-12/CO2, rat catheter, Spider biofilm induced
P46598	0.158405	2.84318e-10	C7_02030W_A	HSP90	Essential chaperone, regulates several signal transduction pathways and temperature-induced morphogenesis; activated by heat shock, stress; localizes to surface of hyphae, not yeast cells; mediates echinocandin and biofilm azole resistance
Q5ADT0	0.158524	0.00152733	C3_07310C_A	SLK19	Alkaline-induced protein of plasma membrane; affects cell aggregation, cell wall; similar to S. cerevisiae Slk19p (a kinetochore protein with roles in mitosis, meiosis); required for wild-type virulence in mouse; macrophage-downregulated
A0A1D8PQC2	0.158745	0.0363188	C6_04100W_A	C6_04100W_A	Ortholog(s) have FFAT motif binding, phosphatidylinositol binding activity
A0A1D8PUB4	0.159744	0.0111765	CR_10840C_A	XYL2	D-xylulose reductase; immunogenic in mice; soluble protein in hyphae; induced by caspofungin, fluconazole, Hog1 and during cell wall regeneration; Mnl1-induced in weak acid stress; stationary phase enriched; flow model biofilm induced
A0A1D8PTD1	0.162412	0.00569506	CR_07050C_A	URA2	Putative bifunctional carbamoylphosphate synthetase-aspartate transcarbamylase; flucytosine induced; macrophage/pseudohyphal-induced; 5'-UTR intron; flow model biofilm repressed
Q5AI86	0.162627	6.71527e-07	C1_02790W_A	TIF34	Putative translation initiation factor eIF3, p39 subunit; mutation confers hypersensitivity to roridin A, verrucarin A; downregulated upon phagocytosis by murine macrophages; Spider biofilm repressed
A0A1D8PK65	0.163833	1.08117e-08	C3_04830C_A	FAS2	Alpha subunit of fatty-acid synthase; required for virulence in mouse systemic infection and rat oropharyngeal infection models; regulated by Efg1; fluconazole-induced; amphotericin B repressed; flow model and Spider biofilm repressed
Q59Z25	0.164776	0.00202013	C2_07190C_A	C2_07190C_A	Putative mitochondrial ribosomal protein; predicted role in aerobic respiration; Spider biofilm repressed
A0A1D8PKJ8	0.166434	0.0250893	C3_06760W_A	C3_06760W_A	Ortholog(s) have role in rRNA processing and preribosome, large subunit precursor localization
A0A1D8PQU3	0.168244	0.00952207	C7_01160C_A	C7_01160C_A	Ortholog of C. dubliniensis CD36 : Cd36_71020, C. parapsilosis CDC317 : CPAR2_300360, C. auris B8441 : B9J08_000715 and Candida tenuis NRRL Y-1498 : CANTEDRAFT_105022
Q59LF3	0.169222	0.00412324	C6_04040C_A	RVS167	SH3-domain- and BAR domain-containing protein involved in endocytosis; null mutant exhibits defects in hyphal growth, virulence, cell wall integrity, and actin patch localization; cosediments with phosphorylated Myo5p
A0A1D8PFM7	0.169502	0.0313629	C1_13320C_A	C1_13320C_A	Protein of unknown function; Spider biofilm repressed
A0A1D8PJ43	0.172272	1.35029e-05	C3_01000W_A	BMS1	Putative GTPase; Hap43-induced gene; mutation confers resistance to 5-fluorocytosine (5-FC); flucytosine induced; repressed by prostaglandins; Spider biofilm induced
Q5AJ93	0.172852	0.00284868	C3_01490W_A	RPS7A	Ribosomal protein S7; genes encoding cytoplasmic ribosomal subunits, translation factors, and tRNA synthetases are downregulated upon phagocytosis by murine macrophage; Spider biofilm repressed
Q59MN2	0.17443	9.77893e-06	C4_05140C_A	GDB1	Putative glycogen debranching enzyme; expression is regulated upon white-opaque switch; regulated by Nrg1, Tup1; rat catheter biofilm repressed
A0A1D8PEB1	0.176181	0.0285495	C1_08230C_A	PLB5	Putative GPI-linked phospholipase B, fungal-specific (no mammalian homolog); null mutation eliminates cell-associated phospholipase A2 activity and attenuates virulence; fluconazole-repressed; flow model biofilm repressed
Q5AEN1	0.176761	0.00107505	C3_02480C_A	CCP1	Cytochrome-c peroxidase N terminus; Rim101, alkaline pH repressed; induced in low iron or by macrophage interaction; oxygen-induced activity; regulated by Sef1, Sfu1, and Hap43; Spider biofilm induced; rat catheter biofilm repressed
Q5AEC3	0.176808	0.0325198	C3_03470W_A	C3_03470W_A	Succinate semialdehyde dehydrogenase; for utilization of gamma-aminobutyrate (GABA) as a nitrogen source; part of 4-aminobutyrate and glutamate degradation pathways; rat catheter biofilm induced
Q59R28	0.177447	0.0395178	C7_03600W_A	MNN26	Putative alpha-1,2-mannosyltransferase; mutant sensitive to calcofluor, SDS and growth at 42 deg; present in detergent-resistant membrane fraction (possible lipid raft component); predicted N-terminal acetylation and transmembrane helix
Q5A7P9	0.177951	0.00184445	C3_00480C_A	DOT5	Putative nuclear thiol peroxidase; alkaline downregulated; sumoylation target; Spider and flow model biofilm induced
A0A1D8PRY3	0.178038	0.000818535	CR_01310W_A	ATP3	F1-ATP synthase complex subunit; caspofungin repressed; flucytosine and macrophage/pseudohyphal-induced; present in exponential and stationary growth phases; Hap43p-induced gene
Q5A362	0.178136	0.0264096	CR_08340W_A	CYS3	Cystathionine gamma-lyase; induced by alkaline, amphotericin B, cadmium stress, oxidative stress via Cap1; possibly adherence-induced; Hog1 regulated; reduced levels in stationary phase yeast cells; Spider and flow model biofilm induced
Q5AI79	0.178483	0.00595634	C1_02860C_A	YKT6	Putative protein of the vacuolar SNARE complex; predicted role in vacuolar fusion; rat catheter biofilm repressed
P53704	0.18079	0.0319293	C3_02280C_A	GFA1	Glucosamine-6-phosphate synthase, homotetrameric enzyme of chitin/hexosamine biosynthesis; inhibited by UDP-GlcNAc, FMDP, N-acyl peptide, kanosamine-6-P; functional homolog of S. cerevisiae Gfa1p; Cagrowth-phase regulated; catalytic Cys
Q59VX8	0.181113	0.0252306	C1_02230W_A	SEP7	Septin, required for wild-type invasive growth in vitro but not required for virulence in a mouse model of systemic infection; localizes to hyphal septum or bud neck; Asn-rich; aberrant gel mobility; phosphorylated in vitro by Gin4p
A0A1D8PRC2	0.182461	4.51952e-06	C7_03360W_A	CPY1	Carboxypeptidase Y; transcript regulated at yeast-hypha transition or macrophage response; induced human neutrophils; regulated by Gcn2 and Gcn4; putative N-glycosylation
A0A1D8PTX2	0.18374	0.0148762	CR_09300C_A	SCO1	Putative copper transporter; Hap43p-repressed gene
A0A1D8PPR2	0.185962	0.0224808	C6_01900C_A	DOG1	Putative 2-deoxyglucose-6-phosphatase; haloacid dehalogenase hydrolase/phosphatase superfamily; similar to S. cerevisiae Dog1, Dog2, Hor1, Rhr2; regulated by Nrg1, Tup1; Spider biofilm repressed
Q5A4W8	0.192606	0.0175704	C5_00200C_A	BDF1	Essential chromatin-binding bromodomain protein; repressed upon adherence to polystyrene; reduced mRNA abundance detected in null mutant; macrophage/pseudohyphal-repressed
A0A1D8PDD1	0.193925	0.00141852	C1_04680W_A	PIL1	Eisosome component; predicted role in endocytosis; echinocandin-binding protein; localizes to cell surface of hyphae, but not yeast-form cells; Hap43, YNB biofilm induced; rat catheter biofilm repressed
P0CU34	0.194572	0.0103942	C3_06330W_A	TSA1B	Putative peroxidase; orf19.7398.1 is contig-truncated fragment of gene identical to TSA1; Tsa1p and Tsa1Bp role under oxidative/reductive stress, hyphal cell wall formation; in hyphal nucleus, cell wall; yeast-form nucleus, cytoplasm
A0A1D8PL12	0.195847	0.0297191	C4_00420C_A	C4_00420C_A	Ortholog(s) have enzyme inhibitor activity and role in actin cortical patch assembly, negative regulation of catalytic activity, septin cytoskeleton organization
Q59MZ5	0.197816	0.00371797	CR_04740C_A	ADE6	5-Phosphoribosylformyl glycinamidine synthetase; adenine biosynthesis; not induced in GCN response, in contrast to S. cerevisiae Ade6; protein in stationary phase yeast-form cultures; flow model and rat catheter biofilm repressed
A0A1D8PJ26	0.198691	2.2374e-07	C3_00880W_A	KGD1	Putative 2-oxoglutarate dehydrogenase; regulated by Efg1 under yeast but not hyphal growth conditions; transcript induced in an RHE model of oral candidiasis; stationary phase enriched protein; Hap43-repressed; rat catheter biofilm induced
Q5AMT2	0.203495	0.0253814	C4_02250C_A	BGL2	Cell wall 1,3-beta-glucosyltransferase; mutant has cell-wall and growth defects, but wild-type 1,3- or 1,6-beta-glucan content; antigenic; virulence role in mouse systemic infection; rat catheter biofilm induced
Q59MU3	0.205555	0.028322	CR_06860C_A	ARO10	Aromatic decarboxylase; Ehrlich fusel oil pathway of aromatic alcohol biosynthesis; alkaline repressed; protein abundance affected by URA3 expression in CAI-4 strain; Spider biofilm induced
Q5A0L8	0.207664	0.000178287	C2_03060W_A	PR26	Protein with similarity to proteasomal 26S regulatory subunit of S. cerevisiae, H. sapiens, Methanobacterium thermoautotrophicum (Archaebacterium)
A0A1D8PQQ3	0.20893	0.0081941	C7_00930W_A	GPH1	Putative glycogen phosphorylase; role in glycogen metabolism; regulated by Ssk1, Mig1, Tup1, Hap43; fluconazole-induced; localizes to cell surface of hyphae, not yeast; stationary phase enriched protein; Spider biofilm induced
A0A1D8PFV8	0.210839	4.05667e-05	C1_14060W_A	C1_14060W_A	Glucan 1,3-beta-glucosidase; regulated by Nrg1, Tup1 and possibly Tac1; induced by NO and during cell wall regeneration; stationary phase enriched; possibly essential (UAU1 method); F-12/CO2 early biofilm induced; flow biofilm repressed
Q59P56	0.21139	0.00635513	C2_06190W_A	ILV1	Putative threonine dehydratase; regulated by Gcn4 and Gcn2; induced by amino acid starvation (3-AT); protein present in yeast exponential and stationary phase cultures; early-stage flow model biofilm induced
P79023	0.21205	0.00068452	C1_05110C_A	ARO4	3-deoxy-D-arabinoheptulosonate-7-phosphate synthase; aromatic amino acid biosynthesis; GCN-regulated; feedback-inhibited by tyrosine if produced in S. cerevisiae Aro3p and Aro4p catalyze same reaction; protein decreases in stationary phase
A0A1D8PR99	0.212188	1.94352e-20	C7_03250C_A	PDI1	Putative protein disulfide-isomerase; antigenic in human infection; soluble protein in hyphae; induced by filamentous growth; protein present in exponential and stationary growth phase yeast cultures; flow model biofilm repressed
Q59TC4	0.212598	0.000268418	C2_04460W_A	LYS22	Homocitrate synthase, minor isoform; repressed by nitric oxide and by hypoxia; protein level decreases in stationary phase cultures; induced by ketoconazole, Spider biofilm induced; flow model biofilm repressed
Q5AJ84	0.215082	0.00366725	C3_01420C_A	C3_01420C_A	Sterol carrier domain protein; alkaline downregulated; colony morphology-related gene regulation by Ssn6; Spider biofilm induced
Q59N43	0.216662	0.0233854	CR_07660C_A	CR_07660C_A	Ortholog(s) have signal recognition particle binding activity, role in protein targeting to ER and integral component of endoplasmic reticulum membrane, signal recognition particle receptor complex localization
A0A1D8PJP4	0.21699	0.00314029	C3_03480C_A	ALT1	Putative alanine transaminase; mutation confers hypersensitivity to 5-fluorocytosine (5-FC); rat catheter and flow model biofilm induced
P46586	0.218054	0.00795792	C5_05320C_A	HIS1	ATP phosphoribosyl transferase; enzyme of histidine biosynthesis; acid upregulated/alkaline repressed by Rim101; regulated by Gcn2, Gcn4; strain CA9 is a his1 mutant; flow model biofilm induced; Spider biofilm repressed
A0A1D8PD83	0.218229	0.0162058	C1_04210C_A	CDC3	Septin; essential for viability; functional homolog of S. cerevisiae Cdc3p; down-regulation associated with azole resistance; macrophage/pseudohyphal-repressed; virulence-group-correlated expression; gene has intron
A0A1D8PMH9	0.218597	0.000782362	C4_06100W_A	CWH41	Processing alpha glucosidase I, involved in N-linked protein glycosylation and assembly of cell wall beta 1,6 glucan; rat catheter biofilm repressed
A0A1D8PS97	0.219121	0.00116886	CR_02580W_A	PAN6	Ortholog(s) have pantoate-beta-alanine ligase activity and role in pantothenate biosynthetic process
A0A1D8PFU8	0.219212	0.00505277	C1_14090W_A	C1_14090W_A	Ortholog(s) have chaperone binding, unfolded protein binding activity and role in chaperone-mediated protein complex assembly, protein folding, protein import into mitochondrial intermembrane space, protein refolding
A0A1D8PCX6	0.220229	0.0225675	C1_03130C_A	GGA2	Protein involved in Golgi trafficking; rat catheter and Spider biofilm repressed
Q59SU5	0.220237	0.0321208	C3_03910W_A	HTA1	Histone H2A; repressed in fkh2 mutant; amphotericin B repressed; farnesol regulated; RNA abundance regulated by tyrosol and cell density; Hap43-induced gene; Spider biofilm repressed
Q5A940	0.221218	0.00102905	C1_01060W_A	MBF1	Putative transcriptional coactivator; caspofungin repressed; involved in virulence
A0A1D8PN90	0.221679	3.03437e-11	C5_01820W_A	STI1	Protein that interacts with Cdc37 and Crk1 in two-hybrid; may be involved in Cdc37 chaperone activity; soluble protein in hyphae; protein in exponential and stationary phase yeast cultures; YNB biofilm induced; Spider biofilm induced
Q5A5Q4	0.221952	1.56427e-06	C2_10670W_A	C2_10670W_A	Putative ubiquitin-like polyubiquitin-binding protein; induced by nitric oxide independent of Yhb1; Spider biofilm repressed
Q5AED0	0.22263	3.03828e-05	C3_03410C_A	C3_03410C_A	Putative glycoside hydrolase; stationary phase enriched protein; Hog1p-downregulated; shows colony morphology-related gene regulation by Ssn6p
A0A1D8PHR9	0.22298	0.00728587	C2_06910W_A	YPT72	Vacuolar Rab small monomeric GTPase involved in vacuolar biogenesis; involved in filamentous growth and virulence
Q5A9Y7	0.223406	0.00912314	C3_00940W_A	C3_00940W_A	Predicted ubiquitin-protein ligase; Hap43-repressed gene; oxidative stress-induced via Cap1; flow model biofilm induced
Q5A895	0.223825	0.0170881	CR_01210C_A	HSE1	ESCRT-0 complex subunit; SH3-domain-containing protein
Q5A9E7	0.223876	4.5817e-05	CR_01350C_A	CR_01350C_A	Ortholog(s) have ATPase activator activity, soluble NSF attachment protein activity and role in SNARE complex disassembly, autophagy, vacuole fusion, non-autophagic, vesicle fusion with Golgi apparatus
Q5A5A0	0.224993	1.22228e-07	C7_02810W_A	PRX1	Thioredoxin peroxidase; transcriptionally induced by interaction with macrophage; fluconazole induced; Fkh2p-downregulated; caspofungin repressed; protein present in exponential and stationary growth phase yeast cultures
O42766	0.229661	0.00516877	C1_03220C_A	BMH1	Sole 14-3-3 protein in C. albicans; role in hyphal growth; possibly regulated by host interaction; localizes to yeast-form cell surface, not hyphae; alternatively spliced 5' UTR intron; Spider biofilm repressed
A0A1D8PPV6	0.230919	0.00961147	C6_02330W_A	C6_02330W_A	Described as a Gag-related protein; hyphal induced; downregulation correlates with clinical development of fluconazole resistance; repressed by nitric oxide, 17-beta-estradiol, ethynyl estradiol
Q5A4W7	0.231608	3.50233e-05	C5_00190C_A	FAS1	Beta subunit of fatty-acid synthase; multifunctional enzyme; Hap43, fluconazole-induced; amphotericin B, caspofungin repressed; macrophage/pseudohyphal-induced; flow model and Spider biofilm repressed
P82611	0.235327	0.0159971	CR_08210C_A	ACO1	Aconitase; induced in high iron; 2 upstream CCAAT motifs; amino acid starvation (3-AT), amphotericin B, phagocytosis, farnesol induced; Hap43, fluconazole-repressed; Gcn4-regulated; antigenic in infection; flow and Spider biofilm repressed
Q5AHI3	0.236168	0.0495272	C2_04080W_A	C2_04080W_A	Protein of unknown function; mutants are viable; Hap43-induced gene; oxidative stress-induced via Cap1; rat catheter and Spider biofilm induced
Q5AIA6	0.23738	2.7571e-05	C1_02590C_A	SNZ1	Stationary phase protein; vitamin B synthesis; induced byyeast-hypha switch, 3-AT or in azole-resistant strain overexpressing MDR1; soluble in hyphae; regulated by Gcn4, macrophage; Spider biofilm induced; rat catheter biofilm repressed
A0A1D8PF90	0.238643	2.32016e-12	C1_11860W_A	C1_11860W_A	Predicted essential RNA-binding G protein; ortholog an effector of mating response pathway in S. cerevisiae; mainly associated with nuclear envelope and ER; flow model and Spider biofilm repressed
Q5AJC2	0.239208	0.00829406	C3_01760W_A	AFG3	Similar to S. cerevisiae Afg3p, a subunit of the mitochondrial inner membrane m-AAA protease; likely to be essential for growth, based on an insertional mutagenesis strategy
A0A1D8PKZ9	0.239358	0.0395129	C4_00270W_A	ATP2	F1 beta subunit of F1F0 ATPase complex; antigenic in human, mice; induced by ciclopirox olamine; caspofungin repressed; macrophage/pseudohyphal-induced; detected during exponential and stationary growth phases; Spider biofilm repressed
A0A1D8PMF5	0.240575	0.0372856	C4_05820W_A	C4_05820W_A	Ortholog(s) have cysteine desulfurase activity, role in iron-sulfur cluster assembly and L-cysteine desulfurase complex, extrinsic component of mitochondrial inner membrane, mitochondrial matrix localization
A0A1D8PP04	0.240637	0.00497145	C5_04640C_A	C5_04640C_A	Ortholog(s) have chromatin binding, histone binding activity
A0A1D8PHW4	0.240971	0.0387344	C2_07350W_A	MCM3	Putative DNA replication protein; periodic mRNA expression, peak at cell-cycle M/G1 phase; Spider biofilm induced
Q5AA01	0.243881	9.50994e-05	C1_05680C_A	RIM1	Putative single-stranded DNA-binding protein; protein level decreases in stationary phase cultures; rat catheter biofilm repressed
A0A1D8PK91	0.245089	0.0126576	C3_05410W_A	C3_05410W_A	Ortholog(s) have role in cellular manganese ion homeostasis, mitochondrion organization
Q5ADV1	0.245253	0.00879807	C3_07480W_A	C3_07480W_A	Ortholog(s) have ubiquitin-protein transferase activity and role in generation of catalytic spliceosome for first transesterification step
A0A1D8PKJ3	0.250786	4.0598e-08	C3_06500W_A	UBA1	Ubiquitin-activating enzyme; protein level decreases in stationary phase cultures
A0A1D8PKW0	0.251593	0.00353375	C3_07770C_A	C3_07770C_A	Ortholog(s) have microtubule binding, microtubule plus-end binding activity
A0A1D8PGS2	0.251621	0.0241172	C2_02940W_A	MET1	Putative uroporphyrin-3 C-methyltransferase, methionine biosynthesis enzyme; upregulated by human whole blood or polymorphonuclear (PMN) cells; Hog1p-induced; fungal-specific (no human or murine homolog); Hap43p-repressed
A0A1D8PLU4	0.252343	0.0360944	C4_03440C_A	DOT4	Protein similar to ubiquitin C-terminal hydrolase; localizes to cell surface of hyphal cells, but not yeast-form cells; repressed upon high-level peroxide; Hap43p-induced; rat catheter biofilm induced
Q96UX5	0.253144	1.51778e-11	C2_03390C_A	HSP78	Heat-shock protein; regulated by macrophage response, Nrg1, Mig1, Gcn2, Gcn4, Mnl1p; heavy metal (cadmium) stress-induced; stationary phase enriched protein; rat catheter and Spider biofilm induced
A0A1D8PM62	0.255887	0.0352678	C4_04830W_A	DCR1	Putative Dicer RNAse involved in RNA interference, similar to S. cerevisiae Rnt1p but orthologous to S. castellii Dcr1p, which is not conserved in S. cerevisiae
A0A1D8PQ57	0.259493	0.00048392	C6_03410C_A	APA2	Putative ATP adenylyltransferase II; regulated by Gcn4; repressed by amino acid starvation (3-AT); induced by prostaglandins; Hap43-repressed; Spider biofilm repressed
Q5ADV4	0.260254	0.0252871	C3_07540C_A	C3_07540C_A	Protein of unknown function; mutants are viable; induced in a cyr1, ras1, or efg1 homozygous null
A0A1D8PKX3	0.261938	0.0224516	C4_00020W_A	VMA6	Putative vacuolar H+-ATPase subunit; required for proper vacuolar ATPase assembly and vacuolar functions; Spider biofilm repressed
Q5ALL8	0.262442	0.000790017	C2_02380W_A	POB3	Protein involved in chromatin assembly and disassembly; ortholog of S. cerevisiae Pob3; transposon mutation affects filamentous growth; rat catheter biofilm repressed
Q5ADM8	0.262907	0.0316716	C3_06880W_A	C3_06880W_A	Protein of unknown function; Hap43-induced gene
Q5AFA2	0.263134	0.0194258	C4_02900C_A	CRH11	GPI-anchored cell wall transglycosylase, putative ortholog of S. cerevisiae Crh1p; predicted glycosyl hydrolase domain; similar to Csf4p and to antigenic A. fumigatus Aspf9; predicted Kex2p substrate; caspofungin-induced
Q59M69	0.264241	0.0470529	C6_02030C_A	C6_02030C_A	Putative protein of unknown function; stationary phase enriched protein
A0A1D8PI24	0.26931	5.69799e-05	C2_08130W_A	ARA1	D-Arabinose dehydrogenase; dehydro-D-arabinono-1,4-lactone synthesis; active on D-arabinose, L-fucose, L-xylose, L-galactose; inhibited by metal ions, thiol group-specific reagents; induced on polystyrene adherence; Spider biofilm induced
Q5A5S6	0.269908	0.00364337	C2_10480W_A	MDH1-3	Predicted malate dehydrogenase; farnesol regulated; protein present in exponential and stationary growth phase yeast; Hap43p-repressed gene
A0A1D8PS56	0.270559	9.55525e-09	CR_02130W_A	ECM4	Cytoplasmic glutathione S-transferase; regulated by Nrg1, Tup1; induced in core stress response, in cyr1 or ras1 mutant (yeast or hyphal cells); Tn mutation affects filamentous growth; stationary phase enriched; Spider biofilm induced
P34948	0.271203	0.000495264	C2_09640W_A	PMI1	Phosphomannose isomerase; cell wall biosynthesis enzyme; drug target; functional homolog of S. cerevisiae, E. coli phosphomannose isomerase; Gcn4-regulated; induced on adherence to polystyrene, phagocytosis; 3-AT, Spider biofilm repressed
A0A1D8PKC9	0.272031	0.00526433	C3_05520C_A	DNM1	Putative dynamin-related GTPase; transcript upregulated inbRHE model of oral candidiasis; transcript regulated by Nrg1, Mig1, and Tup1
A0A1D8PUA2	0.272423	0.00228147	CR_10660W_A	CKA1	Putative alpha subunit (catalytic subunit) of protein kinase CK2; Cka1p and Cka2p have a common target with respect to fluconazole resistance; synthetically lethal with CKA2; flucytosine induced
A0A1D8PGN9	0.275867	0.048518	C2_02720W_A	C2_02720W_A	Ortholog(s) have nuclear import signal receptor activity, role in mRNA export from nucleus, protein import into nucleus and cytoplasm, nucleus localization
A0A1D8PD78	0.276079	0.00424302	C1_04140W_A	IFD6	Aldo-keto reductase; similar to aryl alcohol dehydrogenases; protein increase correlates with MDR1 overexpression (not CDR1 or CDR2) in fluconazole-resistant clinical isolates; farnesol regulated; possibly essential; Spider biofilm induced
A0A1D8PRP4	0.277482	0.000351692	CR_00460C_A	CR_00460C_A	Component of the SSU processome; predicted role in pre-18S rRNA processing; Spider biofilm induced
Q5ADM9	0.2792	0.000377782	C3_06890W_A	PMT2	Protein mannosyltransferase (PMT) with roles in hyphal growth and drug sensitivity; member of the PMT family which includes Pmt1p, Pmt2p, Pmt4p, Pmt5p, and Pmt6p; induced during cell wall regeneration; essential
A0A1D8PHR2	0.280913	0.000895213	C2_06770W_A	C2_06770W_A	Ortholog(s) have actin filament binding, actin monomer binding activity
P83784	0.281269	1.14109e-07	C2_07380W_A	SSC1	Heat shock protein; at yeast-form cell surface, not hyphae; antigenic; Gcn4-regulated; induced by amino acid starvation (3-AT) or by adherence to polystyrene; macrophage-repressed; sumoylation target; possibly essential
P82610	0.281893	8.49776e-07	CR_01620C_A	MET6	Essential 5-methyltetrahydropteroyltriglutamate-homocysteine methyltransferase (cobalamin-independent methionine synthase); antigenic in murine/human systemic infection; heat shock, estrogen, GCN-induced; Spider biofilm repressed
Q59X29	0.283808	0.013948	C2_06150C_A	RPN10	Putative 19S regulatory particle of the 26S proteasome; macrophage/pseudohyphal-repressed; regulated by Gcn2 and Gcn4; Spider biofilm repressed
A0A1D8PCA8	0.28433	0.0238687	C1_00730C_A	CMP1	Catalytic subunit of calcineurin (Ca[2+]-calmodulin-regulated S/T protein phosphatase); required for wild-type virulence, resistance to high pH, Na(+), Li(+), Mn(2+), and fluconazole tolerance; micafungin is fungicidal to null mutant
Q5A7S8	0.285961	0.00975838	C3_00690C_A	SWD1	Ortholog(s) have histone methyltransferase activity (H3-K4 specific) activity
A0A1D8PJI7	0.288437	0.0395946	C3_02810C_A	FAA21	Predicted acyl CoA synthetase; upregulated upon phagocytosis; transcript regulated by Nrg1 and Mig1
Q5AK79	0.288812	0.0433184	C5_04570C_A	URA7	CTP synthase 1; flucytosine induced; protein present in exponential and stationary growth phase yeast cultures
Q59X88	0.289287	0.00765287	CR_08050C_A	CR_08050C_A	Putative thiamine biosynthesis enzyme; decreased expression in an ssr1 null mutant; protein present in exponential and stationary growth phase yeast cultures
A0A1D8PFY0	0.290304	0.0469791	C1_14500C_A	C1_14500C_A	Putative polyamine acetyltransferase; acetylates polyamines (e.g. putrescine, spermidine, spermine) and aralkylamines (e.g. tryptamine, phenylethylamine); Spider biofilm repressed
Q59YC4	0.292205	6.56866e-05	C2_09520C_A	CCT2	Chaperonin of the cytosolic TCP1 ring complex; protein present in exponential and stationary-phase yeast cells, but higher amounts in stationary phase; GlcNAc-induced protein
A0A1D8PH31	0.293276	2.91269e-06	C2_04220C_A	TAF14	Putative DNA-binding transcription factor; TFIIF subunit; macrophage-induced protein; possibly required for yeast cell adherence to silicone substrate; mutant has pleiotrophic effects
A0A1D8PI93	0.298132	0.00633227	C2_08780W_A	RPT6	Putative ATPase of the 19S regulatory particle of the 26S proteasome; transcript regulated by Mig1; regulated by Gcn2 and Gcn4
A0A1D8PMP0	0.298413	0.000144578	C4_06780C_A	OYE32	NAD(P)H oxidoreductase family protein; induced by nitric oxide, amphotericin B, oxidative stress via Cap1; upregulation associated with MDR1 overexpression or benomyl treatment; macrophage-downregulated protein; Spider biofilm induced
A0A1D8PRH6	0.299669	0.00148787	C7_04020C_A	PRE5	Alpha6 subunit of the 20S proteasome; regulated by Gcn4; induced in response to amino acid starvation (3-AT); Spider biofilm repressed
A0A1D8PN45	0.300006	0.00547425	C5_01210W_A	VPS1	Dynamin-family GTPase-related protein; induced upon adherence to polystyrene; regulated by Gcn2p and Gcn4p
A0A1D8PPV5	0.30048	0.0059058	C6_02260C_A	SEC27	Ortholog(s) have ubiquitin binding activity
Q59MN0	0.30189	0.0303792	C4_05150W_A	VAC8	Protein involved in vacuolar inheritance; required for hyphal growth; contains armadillo repeats
Q5APF8	0.303733	0.0100224	C1_09440W_A	C1_09440W_A	Ortholog(s) have inorganic diphosphatase activity, role in aerobic respiration and mitochondrion localization
A0A1D8PH00	0.305764	0.000879636	C2_03790C_A	ASR3	Adenylyl cyclase and stress responsive protein; induced in cyr1 or ras1 mutant; Spider biofilm induced
A0A1D8PQ94	0.308617	0.04183	C6_03750C_A	SBA1	Similar to co-chaperones; induced in high iron; farnesol-, heavy metal (cadmium) stress-induced; protein level decreases in stationary phase cultures; Hap43-repressed
A0A1D8PQ11	0.310626	0.0175072	C6_02970C_A	C6_02970C_A	Putative peripheral peroxisomal membrane peroxin; required for regulating peroxisome size and maintenance; Spider biofilm induced
A0A1D8PFW3	0.310963	0.00034481	C1_14240W_A	C1_14240W_A	Putative RSC chromatin remodeling complex component; possibly an essential gene, disruptants not obtained by UAU1 method
A0A1D8PJW6	0.310995	0.0390971	C3_04330C_A	C3_04330C_A	Protein of unknown function; Cyr1-repressed; induced by alpha pheromone in SpiderM medium; rat catheter and Spider biofilm induced
Q59WV8	0.311899	0.0203676	C6_00930C_A	C6_00930C_A	Protein of unknown function; Spider biofilm induced
P30575	0.312454	5.59464e-05	C1_08500C_A	ENO1	Enolase, involved in glycolysis and gluconeogenesis; also has transglutaminase activity involved in assembly of cell wall polysaccharides; major cell-surface antigen; binds host plasmin/plasminogen; immunoprotective; may be essential
A0A1D8PJB0	0.314424	0.000935508	C3_01720C_A	C3_01720C_A	Alpha subunit of COPI vesicle coatomer complex; role in ER to Golgi vesicle-mediated transport, retrograde vesicle-mediated transport, Golgi to ER transport; flow model biofilm repressed
Q5AJU7	0.317122	0.0261231	C3_02220W_A	CAP1	AP-1 bZIP transcription factor; apoptotic, oxidative stress response/resistance, multidrug resistance; nuclear in oxidative stress; complements S. cerevisiae yap1 mutant; oralpharyngeal candidasis-, human neutrophil, Spider biofilm induced
A0A1D8PGA3	0.317934	0.00425553	C2_01180W_A	COX17	Putative copper metallochaperone; Hap43p-repressed gene; rat catheter biofilm induced; Spider biofilm induced
A0A1D8PSR6	0.322361	0.00113232	CR_04500C_A	CR_04500C_A	Has domain(s) with predicted 2-oxoglutarate-dependent dioxygenase activity and role in oxidation-reduction process
Q5ALV2	0.324881	0.0443626	C2_01640W_A	SLA1	Protein required for assembly of the cortical actin cytoskeleton; contains three SH3 domains; transcription is regulated by Nrg1 and Mig1; flow model biofilm repressed
A0A1D8PIV7	0.329107	0.00150245	C3_00290W_A	RPT2	Putative ATPase of the 19S regulatory particle of the 26S proteasome; oxidative stress-induced via Cap1; Spider biofilm repressed
Q5AEC8	0.330208	0.0373418	C3_03430C_A	C3_03430C_A	Ortholog(s) have role in ATP export, protein targeting to membrane, protein targeting to vacuole and ESCRT I complex, endosome localization
A0A1D8PQH5	0.330303	0.0221617	C7_00110W_A	SOD3	Cytosolic manganese-containing superoxide dismutase; protects against oxidative stress; repressed by ciclopirox olamine, induced during stationary phase when SOD1 expression is low; Hap43-repressed; Spider and flow model biofilm induced
A0A1D8PIM2	0.331695	0.00527755	C2_09990C_A	YOR1	Protein similar to S. cerevisiae Yor1; ABC-type plasma membrane transporter involved in resistance to aureobasidin A; white cell type-specific transcript; Spider biofilm induced
A0A1D8PMD5	0.332306	1.0312e-08	C4_05610C_A	C4_05610C_A	Putative eisosome component role in proper eisosome assembly; upregulated in cyr1 null mutant
A0A1D8PP67	0.333602	0.0450704	C5_05300W_A	RIB5	Putative riboflavin synthase; fungal-specific (no human or murine homolog); farnesol-downregulated; protein present in exponential and stationary growth phase yeast cultures
A0A1D8PQE3	0.333817	0.00200049	C6_04410C_A	C6_04410C_A	Predicted alcohol dehydrogenase; Spider biofilm induced
A0A1D8PMQ4	0.337239	1.60793e-06	C4_06870W_A	RPT5	26S proteasome regulatory subunit; transcript regulated by Nrg1 and Mig1; regulated by Gcn2 and Gcn4; protein level decreases in stationary phase
Q5AF03	0.338109	0.000179672	C3_02610C_A	GLX3	Glutathione-independent glyoxalase; binds human immunoglobulin E; alkaline, fluconazole, Hog1 repressed; hypoxia, oxidative stress via Cap1, Hap43 induced; stationary-phase enriched; rat catheter, Spider biofilm induced
Q5ABD0	0.338131	5.93065e-05	C1_00650C_A	SNF7	ESCRT III complex protein; role in proteolytic activation of Rim101 and Rim8 processing/activation; separable roles in RIM101 pathway and in transport from MVB to vacuole; involved in echinocandin and azole sensitivity
Q5AD20	0.338342	0.043457	C2_00770W_A	C2_00770W_A	Putative protein of unknown function; Hap43p-repressed gene; mutation confers hypersensitivity to toxic ergosterol analog, and to amphotericin B
A0A1D8PU55	0.340308	0.000747849	CR_10230W_A	CR_10230W_A	Ortholog(s) have histone acetyltransferase activity, role in histone acetylation, replication-born double-strand break repair via sister chromatid exchange and Ada2/Gcn5/Ada3 transcription activator complex localization
A0A1D8PG20	0.340685	0.00142569	C2_00340C_A	ARO8	Aromatic transaminase of the Ehrlich fusel oil pathway of aromatic alcohol biosynthesis; Rim101 independent alkaline induction; protein abundance affected by URA3 expression in CAI-4 strain; Gcn4-regulated; stationary phase enriched
A0A1D8PJ13	0.341832	0.0266606	C3_00810C_A	FOX2	3-hydroxyacyl-CoA epimerase; fatty acid beta-oxidation; induced by phagocytosis; regulated by Mig1, by white-opaque switch, by DNA methylation; transcriptional activation by oleate requires Ctf1; rat catheter and Spider biofilm induced
A0A1D8PDC5	0.342943	0.000636162	C1_04750W_A	IFE1	Putative medium-chain alcohol dehydrogenase; rat catheter and Spider biofilm repressed
Q59SL5	0.343066	0.00492204	C4_00830W_A	SPS20	Peroxisomal 2,4-dienoyl-CoA reductase; stationary phase enriched protein; Spider biofilm induced
A0A1D8PE30	0.343276	0.00193702	C1_07510W_A	C1_07510W_A	Putative non-specific single-domain racemase; regulated by Gcn4p; repressed in response to amino acid starvation (3-AT treatment); alkaline upregulated; macrophage-induced protein
A0A1D8PQ60	0.344313	0.00136024	C6_03470W_A	C6_03470W_A	Putative phosphatidylinositol transfer protein; possibly an essential gene, disruptants not obtained by UAU1 method
Q5ANP3	0.346066	0.0219473	C3_04130W_A	C3_04130W_A	Ortholog of C. dubliniensis CD36 : Cd36_84070, C. parapsilosis CDC317 : CPAR2_102720, Candida tenuis NRRL Y-1498 : CANTEDRAFT_98617 and Debaryomyces hansenii CBS767 : DEHA2D07392g
A0A1D8PJ61	0.348892	0.0336709	C3_01150C_A	C3_01150C_A	Ortholog of S. cerevisiae Apd1; required for normal localization of actin patches and normal tolerance of sodium ions and hydrogen peroxide; Hap43-induced; Spider biofilm induced
A0A1D8PD97	0.349239	0.000770064	C1_04360C_A	C1_04360C_A	Has domain(s) with predicted ATPase inhibitor activity, role in negative regulation of ATPase activity, negative regulation of nucleotide metabolic process and mitochondrion localization
P31353	0.351529	5.45469e-07	C1_02480W_A	PMM1	Phosphomannomutase; enzyme of O- and N-linked mannosylation; interconverts mannose-6-phosphate and mannose-l-phosphate; functional homolog of S. cerevisiae Sec53; antigenic in mice; Hap43-induced; flow model and Spider biofilm repressed
A0A1D8PS15	0.351851	9.29536e-05	CR_01610C_A	SHP1	Regulator of the type 1 protein phosphatase Glc7p activity, involved in control of morphogenesis, progression through the cell cycle and response to DNA damage
A0A1D8PFL7	0.352956	3.28284e-06	C1_13300C_A	RPN1	Putative 19S regulatory particle of the 26S proteasome; regulated by Gcn2p and Gcn4p
A0A1D8PT61	0.354161	0.0293353	CR_06170W_A	CR_06170W_A	Protein of unknown function; oral infection induced; mutants have reduced capacity to damage oral epithelial cells; rat catheter biofilm repressed
A0A1D8PRL3	0.35438	0.000379473	CR_00090C_A	CR_00090C_A	Protein of unknown function; stationary phase enriched protein; induced upon yeast-hypha transition; benomyl or caspofungin induced; Hap43-repressed; Spider biofilm induced
A0A1D8PTU4	0.354716	0.0001973	CR_08920W_A	CR_08920W_A	Protein with predicted oxidoreductase and dehydrogenase domains; Hap43-repressed; Spider biofilm induced
A0A1D8PL14	0.357241	0.0111339	C4_00160C_A	CAR2	Ornithine aminotransferase; arginine metabolism; alkaline induced; mutant sensitivite to toxic ergosterol analog, to amphotericin B; exponential and stationary phase yeast; flow model biofilm induced; rat catheter, Spider biofilm repressed
Q5A3L0	0.358148	0.000112402	C1_12050W_A	RPN2	Putative 26S proteasome subunit; transcript regulated by Mig1; caspofungin repressed; regulated by Gcn2 and Gcn4; gene used for strain identification by multilocus sequence typing
A0A1D8PPM9	0.35859	0.00712373	C6_01510W_A	OYE23	Putative NAPDH dehydrogenase; induced by nitric oxide, benomyl; oxidative stress-induced via Cap1; Hap43p-repressed; rat catheter biofilm induced
A0A1D8PSM6	0.359896	0.000614597	CR_04080C_A	SEC63	Endoplasmic reticulum (ER) protein-translocation complex subunit
A0A1D8PF42	0.360606	5.23736e-12	C1_11200W_A	C1_11200W_A	Predicted mucin-like protein; ketoconazole-induced; fluconazole-repressed; induced in cyr1 mutant; colony morphology-related gene regulation by Ssn6; flow model biofilm induced; Spider biofilm induced
Q5ANH8	0.362631	0.0163415	C3_04650W_A	C3_04650W_A	Ortholog of S. cerevisiae : AIM6, C. glabrata CBS138 : CAGL0C05533g, C. dubliniensis CD36 : Cd36_84610, C. parapsilosis CDC317 : CPAR2_404550 and C. auris B8441 : B9J08_003753
A0A1D8PKW2	0.364924	0.00231192	C3_07830W_A	FBP1	Fructose-1,6-bisphosphatase; key gluconeogenesis enzyme; regulated by Efg1, Ssn6; induced by phagocytosis; effects switch from glycolysis to gluconeogenesis in macrophage; rat flow model biofilm induced; overlaps orf19.6179
A0A1D8PTU7	0.368678	5.97094e-06	CR_08890C_A	ASR2	Adenylyl cyclase and stress responsive protein; induced in cyr1 or ras1 mutant; stationary phase enriched protein; Spider biofilm induced
P46587	0.36884	0.000102367	C1_04300C_A	SSA2	HSP70 family chaperone; cell wall fractions; antigenic; beta-defensin peptides impport; ATPase domain binds histatin 5; at hyphal surface, not yeast; farnesol-repressed in biofilm; flow model, Spider biofilm repressed; caspofungin repressed
A0A1D8PSE7	0.370134	0.0371007	CR_03280W_A	IFR2	Zinc-binding dehydrogenase; induced by benomyl, ciclopirox olamine, alpha pheromone, Hap43; regulated by oxidative stress via Cap1, osmotic stress via Hog1; protein present in exponential and stationary phase; rat catheter biofilm repressed
Q59TU5	0.370773	3.07985e-08	C1_11700C_A	MRF1	Putative mitochondrial respiratory protein; induced by farnesol, benomyl, nitric oxide, core stress response; oxidative stress-induced via Cap1; stationary-phase enriched protein; Spider biofilm induced
A0A1D8PPH3	0.37124	3.14101e-07	C6_00910C_A	C6_00910C_A	Protein with a predicted thioredoxin-like domain; Hap43-repressed; induced by prostaglandins
Q5AH09	0.374612	0.0258684	C7_01920W_A	CDC34	Putative ubiquitin-protein ligase; transcript regulated by Nrg1 and Tup1, and by Gcn2 and Gcn4; rat catheter biofilm induced
Q59Z38	0.375847	0.0490833	C2_07070W_A	C2_07070W_A	Protein similar to quinone oxidoreductases; induced by benomyl treatment, nitric oxide; oxidative stress-induced via Cap1; stationary-phase enriched protein; Spider biofilm induced
A0A1D8PF79	0.381968	0.00141925	C1_11660W_A	GAD1	Putative glutamate decarboxylase; alkaline, macrophage-downregulated gene; amphotericin B induced; induced by Mnl1 under weak acid stress; stationary phase enriched protein; rat catheter biofilm repressed
A0A1D8PFV4	0.383033	0.0160921	C1_14280C_A	NPL3	Putative RNA-binding protein; required for normal flow model biofilm growth; nuclear export is facilitated by Hmt1p; transcript upregulated in RHE model of oralcandidiasis; Spider biofilm repressed
Q9Y872	0.384247	0.0021509	C1_13870W_A	MET3	ATP sulfurlyase; sulfate assimilation; repressed by Met, Cys, Sfu1, or in fluconazole-resistant isolate; Hog1, caspofungin, white phase-induced; induced on biofilm formation, even in presence of Met and Cys; Spider, F-12/CO2 biofilm induced
Q59NC4	0.387454	0.000891254	C1_10450W_A	GLY1	L-threonine aldolase; complements glycine auxotrophy of S. cerevisiae shm1 shm2 gly1-1 triple mutant; macrophage/pseudohyphal-induced; the GLY1 locus has an RFLP and is triploid in strain SGY269; flow model biofilm induced
P40954	0.388639	0.00023344	CR_10110W_A	CHT3	Major chitinase; secreted; functional homolog of S. cerevisiae Cts1p; 4 N-glycosylation motifs; possible O-mannosylation; putative signal peptide; hyphal-repressed; farnesol upregulated in biofilm; regulated by Efg1p, Cyr1p, Ras1p
A0A1D8PRR5	0.388969	0.00858109	CR_00620C_A	ARG1	Argininosuccinate synthase; arginine synthesis; Gcn4, Rim101 regulated; induced by amino acid starvation (3-AT), benomyl treatment; stationary phase enriched protein; repressed in alkalinizing medium; rat catheter, Spider biofilm induced
A0A1D8PMA1	0.394115	0.00646455	C4_05320W_A	LYS1	Saccharopine dehydrogenase (biosynthetic); enzyme of alpha-aminoadipate lysine biosynthesis pathway; functionally complements S. cerevisiae lys1 mutation; fungal-specific (no human or murine homolog)
O13289	0.394314	3.21167e-12	C1_06810W_A	CAT1	Catalase; resistance to oxidative stress, neutrophils, peroxide; role in virulence; regulated by iron, ciclopirox, fluconazole, carbon source, pH, Rim101, Ssn6, Hog1, Hap43, Sfu1, Sef1, farnesol, core stress response; Spider biofilm induced
A0A1D8PKZ7	0.394791	0.0135089	C4_00240C_A	PRO3	Delta 1-pyrroline-5-carboxylate reductase; protein induced during the mating process; alkaline induced; stationary phase enriched protein; Spider biofilm repressed
Q5A747	0.395256	1.90345e-06	C1_08360C_A	OLE1	Fatty acid desaturase, essential protein involved in oleic acid synthesis; required for aerobic hyphal growth and chlamydospore formation; subject to hypoxic regulation; fluconazole-induced; caspofungin repressed; Hap43p-induced
A0A1D8PKJ5	0.395412	0.0434326	C3_06610W_A	C3_06610W_A	Ortholog(s) have protein binding, bridging activity, role in septin ring assembly and cellular bud neck, cellular bud neck septin ring localization
A0A1D8PNK3	0.396499	3.51693e-05	C5_02930C_A	GRE3	Putative D-xylose reductase; antigenic in murine systemic infection; soluble protein in hyphae; induced by farnesol, macrophage interaction and by Mnl1 under weak acid stress; stationary-phase enriched protein; Spider biofilm induced
Q5AC33	0.39887	1.95849e-06	C6_02480W_A	C6_02480W_A	Similar to alcohol dehydrogenases; induced by benomyl treatment, nitric oxide; induced in core stress response; oxidative stress-induced via Cap1; Spider biofilm repressed
A0A1D8PTR7	0.400851	0.00654393	CR_08460W_A	TPM2	Putative tropomyosin isoform 2; regulated by Gcn4; repressed by amino acid starvation; macrophage-induced; protein levels decrease in stationary cells; Hap43-induced; rat catheter and Spider biofilm repressed
P0CB54	0.400888	0.0012599	C1_02760W_A	C1_02760W_A	Putative guanyl-nucleotide exchange factor; Spider biofilm repressed
Q5AJ90	0.402105	0.0181665	C3_01460C_A	FOX3	Putative peroxisomal 3-oxoacyl CoA thiolase; transcript regulated by white-opaque switch; Spider biofilm induced
A0A1D8PM93	0.402413	0.023179	C4_05190C_A	EDC3	Protein with mRNA binding activity, involved in regulation of activity of putative metacaspase Mca1p
Q5AND4	0.402466	2.31428e-09	C3_05000W_A	RDI1	Putative rho GDP dissociation inhibitor; transposon mutation affects filamentous growth; farnesol, filament-induced; regulated by Nrg1, Tup1; protein levels low in stationary phase yeast
P40953	0.402574	0.0344647	C5_04130C_A	CHT2	GPI-linked chitinase; required for normal filamentous growth; repressed in core caspofungin response; fluconazole, Cyr1, Efg1, pH-regulated; mRNA binds She3 and is localized to yeast-form buds and hyphal tips; Spider biofilm repressed
Q5AMT7	0.402743	2.7798e-08	C4_02270C_A	BFR1	Protein involved in the maintenance of normal ploidy; S. cerevisiae ortholog cofers Brefeldin A resistance; stationary phase enriched protein; Spider biofilm repressed
A0A1D8PCG7	0.402984	0.0182385	C1_01370C_A	RPS21B	Ribosomal protein S21; regulated by Nrg1, Tup1; colony morphology-related gene regulation by Ssn6; positively regulated by Tbf1, Hap43; Spider biofilm repressed
Q5AKX2	0.403321	2.56762e-05	C1_13670W_A	OSM2	Putative mitochondrial fumarate reductase; regulated by Ssn6p, Gcn2p, and Gcn4p; Hog1p-downregulated; stationary phase enriched protein; Hap43p-repressed gene
Q5AAI8	0.40865	0.000518301	CR_00320C_A	NAP1	Nucleosome assembly protein; mutants show constitutive filamentous growth; present in exponential and stationary growth phase yeast cultures
A0A1D8PT53	0.409718	0.0114506	CR_05950C_A	ADP1	Putative PDR-subfamily ABC transporter; similar to WHITE subfamily proteins; gene used for strain identification by multilocus sequence typing
Q5ABD9	0.41493	0.00314862	C1_00750C_A	VPS27	Putative ESCRT-0 complex protein with a role in multivesicular body (MVB) trafficking
Q5A360	0.41533	0.000117388	CR_08350W_A	CR_08350W_A	Ortholog(s) have adenyl-nucleotide exchange factor activity and role in SRP-dependent cotranslational protein targeting to membrane, translocation
A0A1D8PRP2	0.415848	0.0003124	CR_00380W_A	CR_00380W_A	Protein with NADPH oxidoreductase containing flavin mononucleotide (FMN) domain; induced by nitric oxide
Q5A2A0	0.417421	0.000721026	C1_05240C_A	RPT1	Putative 26S proteasome regulatory subunit 7; Hap43p-repressed gene; regulated by Gcn2p and Gcn4p; overlaps orf19.442
Q59Y37	0.421475	0.00997681	C2_08640C_A	PST2	Flavodoxin-like protein involved in oxidative stress protection and virulence; putative NADH:quinone oxidoreductase; similar to 1,4-benzoquinone reductase; induced by benomyl, oxidative stress via Cap1; fungal-specific
Q5AF71	0.423744	4.96083e-07	C4_02620C_A	C4_02620C_A	Carbohydrate kinase domain-containing protein; Spider biofilm induced
Q5ALM0	0.427327	5.65655e-10	C2_02370C_A	HOM2	Aspartate-semialdehyde dehydrogenase; forms a homodimer; conserved in bacteria, archaea, and fungi but not in mammals; ketoconazole-repressed; protein present in exponential and stationary growth phase yeast cultures; GlcNAc-induced protein
Q5AGF0	0.428353	0.0221329	C5_02220C_A	C5_02220C_A	Putative polyphosphate phosphatase; role in hydrolysis of diphosphorylated inositol polyphosphates and diadenosine polyphosphates; Spider biofilm induced
O93827	0.428863	4.47173e-06	C3_07950C_A	SRB1	Essential GDP-mannose pyrophosphorylase; makes GDP-mannose for protein glycosylation; functional in S. cerevisiae psa1; on yeast-form, not hyphal cell surface; alkaline induced; induced on adherence to polystyrene; Spider biofilm repressed
Q5ABQ7	0.429033	0.0434551	C1_00860W_A	C1_00860W_A	Ortholog(s) have Atg8 ligase activity
A0A1D8PT83	0.432324	0.0180348	CR_06510W_A	CR_06510W_A	Protein of unknown function; Hap43-induced; rat catheter and Spider biofilm induced
A0A1D8PGL1	0.432944	7.61783e-05	C2_02410W_A	C2_02410W_A	Plasma membrane-localized protein of unknown function
Q5AQ76	0.435251	3.58986e-08	C1_08740C_A	SEC24	Protein with a possible role in ER to Golgi transport; induced upon yeast-hyphal switch; sumoylation target; Spider biofilm repressed
P42800	0.438384	0.0224828	CR_10100C_A	INO1	Inositol-1-phosphate synthase; antigenic in human; repressed by farnesol in biofilm or by caspofungin; upstream inositol/choline regulatory element; glycosylation predicted; rat catheter, flow model induced; Spider biofilm repressed
Q5ACI8	0.442269	0.00197238	CR_10670W_A	CPR6	Putative peptidyl-prolyl cis-trans isomerase; macrophage/pseudohyphal-repressed; heavy metal (cadmium) stress-induced; heterozygous null mutant displays sensitivity to virgineone; rat catheter biofilm induced
A0A1D8PG96	0.442919	2.04227e-24	C2_01120W_A	KAR2	Similar to Hsp70 family chaperones; role in translocation of proteins into the ER; induced in high iron; protein present in exponential and stationary growth phase yeast cultures; flow model and Spider biofilm repressed
A0A1D8PD74	0.452156	0.00924808	C1_04010C_A	C1_04010C_A	Protein with a NADP-dependent oxidoreductase domain; transcript induced by ketoconazole; rat catheter and Spider biofilm induced
Q5A006	0.453772	0.00046477	CR_03600C_A	CR_03600C_A	Ortholog(s) have role in retrograde vesicle-mediated transport, Golgi to endoplasmic reticulum and COPI vesicle coat localization
A0A1D8PFN6	0.454249	1.09859e-07	C1_13580W_A	SEC18	Functional homolog of S. cerevisiae Sec18p, which acts in protein transport; conserved ATP binding site; not glycosylated
Q59PA6	0.455148	0.0157595	C4_04370C_A	VAC7	Ortholog of S. cerevisiae Vac7; integral vacuolar membrane protein involved in vacuole inheritance and morphology; mutants are viable
A0A1D8PNA8	0.456038	2.65471e-05	C5_02030W_A	RPN8	Putative regulatory subunit of the 26S proteasome; mutation confers hypersensitivity to amphotericin B; regulated by Mig1, Gcn2 and Gcn4; Spider biofilm repressed
A0A1D8PQF9	0.456284	0.0387943	C6_04560W_A	C6_04560W_A	Putative ortholog of mammalian electron transfer flavoprotein complex subunit ETF-alpha; Spider biofilm repressed
A0A1D8PCG5	0.459714	0.014982	C1_01390C_A	HOT1	Putative transcription factor; required for inhibition of filamentous growth by farnesoic acid and for expression of PHO81; filament induced
Q59WG3	0.46104	2.75515e-07	C1_10790W_A	CDC48	Putative microsomal ATPase; plasma membrane-localized; regulated by Gcn2 and Gcn4; induced by amino acid starvation (3-AT); macrophage/pseudohyphal-repressed; protein levels decrease in stationary phase yeast; Spider biofilm repressed
A0A1D8PD50	0.461091	0.044907	C1_03820W_A	PDR16	Phosphatidylinositol transfer protein; induction correlates with CDR1, CDR2 overexpression/azole resistance; fluphenazine, 17-beta-estradiol, ethynyl estradiol, NO induced; farnesol-downregulated in biofilm; rat catheter biofilm induced
A0A1D8PRL6	0.466733	1.74929e-05	CR_00150C_A	POT1	Putative peroxisomal 3-oxoacyl CoA thiolase; transcript regulated by Nrg1 and Mig1; farnesol regulated; Hap43-repressed
Q5AQ36	0.468128	0.0209796	C1_09140C_A	SSU81	Predicted adaptor protein involved in activation of MAP kinase-dependent signaling pathways; links response to oxidative stress to morphogenesis and cell wall biosynthesis; caspofungin repressed
O74201	0.468321	0.0252395	C7_03870W_A	RAD6	Functional ortholog of S. cerevisiae Rad6; negative regulator of hyphal growth; required for wild-type UV resistance; acts in pathway with Efg1; ; transcript is UV-induced, slightly repressed during hyphal growth; gene has two introns
Q5A455	0.468466	4.24044e-05	C4_05690W_A	SEC23	Putative GTPase-activating protein; regulated upon yeast-hypha switch; Spider biofilm repressed
Q9UW14	0.471536	0.00832311	C1_14340C_A	RIM101	Transcription factor; alkaline pH response; required for alkaline-induced hyphal growth; role in virulence in mice; activated by C-terminal proteolytic cleavage; mediates both positive and negative regulation; Spider biofilm induced
Q59X49	0.471561	0.000925464	C2_09220W_A	DDR48	Immunogenic stress-associated protein; filamentation regulated; induced by benomyl/caspofungin/ketoconazole or in azole-resistant strain; Hog1, farnesol, alkaline repressed; stationary phase enriched; Spider, flow model biofilm induced
Q5A786	0.472264	0.00950647	C1_08030W_A	PFY1	Profilin; functional homolog of S. cerevisiae Pfy1; hyphae, macrophage/pseudohyphal-induced; regulated by Nrg1, Tup1; gene lacks intron (unlike S. cerevisiae PFY1); complements growth of S. cerevisiae srv2 mutant; nonessential
A0A1D8PCY5	0.475021	1.18916e-05	C1_03210C_A	CDC12	Septin; essential for viability; forms ring at sites of cell division and also forms filaments in mature chlamydospore; filamentous growth induced; regulated by Nrg1, Tup1, tyrosol and cell density; rat catheter biofilm repressed
Q5AD39	0.478287	1.92956e-07	C2_00960C_A	MXR1	Putative methionine sulfoxide reductase; Plc1-regulated; induced by human neutrophils, flucytosine; macrophage regulated (gene induced, protein decreased); possibly adherence-induced; Spider biofilm induced
Q5AAU3	0.48321	7.16651e-14	C1_06930W_A	PGA63	Component COPII vesicle coat; required for vesicle formation in ER to Golgi transport; predicted GPI-anchor; flow model and Spider biofilm repressed
A0A1D8PIK3	0.486814	0.0185571	C2_09810C_A	C2_09810C_A	Protein with predicted peptidase domains; Hap43-repressed gene
A0A1D8PMC5	0.487876	0.00866228	C4_05560C_A	ARO9	Aromatic transaminase; Ehrlich fusel oil pathway of aromatic alcohol biosynthesis; Rim101-dependent pH-regulation (alkaline induced); Hap43-induced gene
A0A1D8PGI8	0.492759	9.12859e-06	C2_02030W_A	ARO3	3-deoxy-D-arabinoheptulosonate-7-phosphate synthase; aromatic amino acid synthesis; GCN-regulated; feedback-inhibited by phe if expressed in S. cerevisiae; decreased in stationary phase; flow model biofilm repressed
Q5AC22	0.495785	0.0329469	C6_02590C_A	MOB1	Putative mitotic exit network component; periodic mRNA expression, peak at cell-cycle G2/M phase
A0A1D8PNB5	0.500628	0.0310702	C5_01970C_A	CDC24	GDP-GTP exchange factor for Cdc42p; phosphorylated; required for maintenance of hyphal growth; misexpression blocks hyphal growth and causes avirulence in a mouse model of systemic infection; antigenic during human oral infection
Q59NQ2	0.501223	0.0219373	C5_01560C_A	C5_01560C_A	Putative glutaredoxin; induced by nitric oxide; Spider biofilm induced
A0A1D8PRL4	0.502377	1.16978e-11	CR_00080W_A	MIS12	Mitochondrial C1-tetrahydrofolate synthase precursor
Q59XX2	0.502523	5.60559e-06	C2_10030C_A	MP65	Cell surface mannoprotein; cell-wall glucan metabolism, adhesion; adhesin motif; O-glycosylation; induced by heat, germ tube formation, wall regeneration; mycelial antigen; diagnostic marker; fluconazole-repressed; Spider biofilm induced
Q59SU1	0.507271	1.49173e-05	C3_03870C_A	SAP9	Secreted aspartyl protease; roles in adhesion, cell surface integrity; induced by antifungal drugs, stationary phase, or in white-phase cells; farnesol-downregulated in biofilm; autocatalytic processing; GPI-anchor; Spider biofilm induced
A0A1D8PC38	0.510754	0.000262107	C1_00040W_A	CTA2	Putative transcription factor; Med2 mediator domain; activates transcription in 1-hybrid assay in S. cerevisiae; repressed by Efg1; member of a family of telomere-proximal genes; Tbf1-induced
P29717	0.51096	0.000547303	C1_02990C_A	XOG1	Exo-1,3-beta-glucanase; 5 glycosyl hydrolase family member; affects sensitivity to chitin and glucan synthesis inhibitors; not required for yeast-to-hypha transition or for virulence in mice; Hap43-induced; Spider biofilm induced
Q59U59	0.518679	0.000167297	C2_07400C_A	APR1	Vacuolar aspartic proteinase; transcript equivalent in yeast-form and mycelial cells but is elevated at lower growth temperatures; upregulated iby human neutrophils; protein enriched in stationary phase; Spider biofilm induced
Q59T88	0.520346	1.53609e-05	C1_01810C_A	UGA2	Predicted succinate semialdehyde dehydrogenase; predicted role in glutamate catabolism; transcription regulated by Mig1, Tup1, Gcn4; mutants are viable
A0A1D8PQT1	0.522378	0.0413169	C7_01230C_A	C7_01230C_A	Ortholog of S. cerevisiae : YNL011C, C. glabrata CBS138 : CAGL0H03619g, C. dubliniensis CD36 : Cd36_71090, C. parapsilosis CDC317 : CPAR2_300420 and C. auris B8441 : B9J08_005457
P83773	0.523191	2.70511e-09	C5_02000C_A	ACH1	Acetyl-coA hydrolase; acetate utilization; nonessential; soluble protein in hyphae; antigenic in human; induced on polystyrene adherence; farnesol-, ketoconazole-induced; no human or murine homolog; stationary phase-enriched protein
Q5ADT4	0.523552	5.95725e-06	C3_07340W_A	GCY1	Aldo/keto reductase; mutation confers hypersensitivity to toxic ergosterol analog; farnesol-repressed; stationary phase enriched protein; flow model biofilm induced; Spider biofilm repressed
Q5A886	0.525151	0.0231093	CR_01120C_A	CR_01120C_A	Putative TFIID and SAGA complex subunit; possibly an essential gene, disruptants not obtained by UAU1 method
A0A1D8PDN3	0.527767	7.38455e-08	C1_05410C_A	TRP99	Putative thioredoxin peroxidase/alkyl hydroperoxide reductase; induced in low iron; regulated by Gcn4; induced in response to amino acid starvation (3-AT treatment)
A0A1D8PNW1	0.528243	0.00129419	C5_04110W_A	SCW11	Cell wall protein; repressed in ace2 mutant; repressed in core caspofungin response; induced in high iron; possibly an essential gene, disruptants not obtained by UAU1 method; rat catheter and Spider biofilm repressed
A0A1D8PJW9	0.530382	1.98232e-06	C3_04340W_A	ATF1	Putative alcohol acetyltransferase; caspofungin repressed; expression depends on Tac1p
Q59QH2	0.532103	3.23708e-05	C1_04020C_A	CSH1	Aldo-keto reductase; role in fibronectin adhesion, cell surface hydrophobicity; regulated by temperature, growth phase, benomyl, macrophage interaction; azole resistance associated; Spider biofilm induced; rat catheter biofilm repressed
Q5A894	0.54067	0.000351692	CR_01200W_A	OYE22	Putative NADPH dehydrogenase; rat catheter biofilm induced
Q5AI48	0.543178	6.85559e-05	C1_03120W_A	C1_03120W_A	Ortholog of S. cerevisiae : YDR262W, C. glabrata CBS138 : CAGL0M08734g, C. dubliniensis CD36 : Cd36_02920, C. parapsilosis CDC317 : CPAR2_108490 and C. auris B8441 : B9J08_000615
Q59U61	0.548861	0.0320353	C2_07410W_A	C2_07410W_A	Ortholog(s) have acylglycerol lipase activity, triglyceride lipase activity and role in medium-chain fatty acid biosynthetic process, triglyceride metabolic process
Q5AF38	0.550799	1.54571e-07	C4_02360W_A	AMS1	Putative alpha-mannosidase; transcript regulated by Nrg1; induced during cell wall regeneration; flow model biofilm induced; Spider biofilm induced
A0A1D8PCV7	0.551158	2.44606e-21	C1_02820W_A	LYS2	Heterodimeric alpha-aminoadipate reductase large subunit; lysine biosynthesis; predicted binding sites for AMP and alpha-aminoadipate; inhibited by lys or thialysine; regulated by Gcn2 and Gcn4; Spider biofilm induced, flow model repressed
A0A1D8PPK1	0.551303	1.2338e-15	C6_01180C_A	EBP1	NADPH oxidoreductase; interacts with phenolic substrates (17beta-estradiol); possible role in estrogen response; induced by oxidative, weak acid stress, NO, benomyl, GlcNAc; Cap1, Mnl1 induced; Hap43-repressed; rat catheter biofilm induced
A0A1D8PRH0	0.558446	9.19942e-08	C7_03860W_A	C7_03860W_A	Putative vacuolar protease; upregulated in the presence of human neutrophils; Spider biofilm induced
A0A1D8PNC7	0.560961	0.0132197	C5_02080C_A	HSP12	Heat-shock protein; induced by osmotic/oxidative/cadmium stress, fluphenazine treatment, low iron, CDR1 and CDR2 overexpression, or ssn6 or ssk1 null mutation; overexpression increases resistance to farnesol and azoles
A0A1D8PU28	0.561461	0.00411011	CR_09750C_A	CR_09750C_A	Ortholog(s) have phosphatidylinositol-3-phosphate binding, ubiquitin protein ligase activity, ubiquitin-protein transferase activity and role in cytoplasm protein quality control by the ubiquitin-proteasome system, protein ubiquitination
Q59Z55	0.568109	4.16204e-14	C2_06890C_A	C2_06890C_A	Similar to oxidoreductases and to S. cerevisiae Yjr096wp; Sfu1 repressed; induced by benomyl treatment, Ssr1; Hap43-repressed; flow model biofilm repressed
A0A1D8PCW3	0.571004	0.000101803	C1_02980W_A	GOR1	Ortholog(s) have glyoxylate reductase activity, role in glyoxylate catabolic process and extracellular region localization
A0A1D8PHQ6	0.572638	1.95536e-06	C2_06720W_A	GRE2	Putative reductase; Nrg1 and Tup1-regulated; benomyl- and hyphal-induced; macrophage/pseudohyphal-repressed; repressed by low iron; possibly involved in osmotic stress response; stationary phase enriched protein; Spider biofilm induced
Q5AF37	0.57504	1.43132e-06	C4_02340W_A	C4_02340W_A	Putative protease B inhibitor; hyphal-induced expression; Cyr1p- and Ras1p-repressed
Q59VX1	0.578778	0.0483094	C1_02300W_A	C1_02300W_A	Ortholog(s) have unfolded protein binding activity, role in cytoskeleton organization, positive regulation of transcription elongation from RNA polymerase II promoter, protein folding and prefoldin complex localization
A0A1D8PCL8	0.579566	0.00193606	C1_01930W_A	C1_01930W_A	Protein of unknown function; regulated by Nrg1, Tup1; Spider and flow model biofilm induced
A0A1D8PND9	0.582554	4.19244e-07	C5_02300C_A	RET2	Delta subunit of the coatomer complex (COPI); coats Golgi-derived transport vesicles; involved in retrograde transport between Golgi and ER; interacts with Crk1 in the two-hybrid system; Spider biofilm repressed
Q59RB8	0.582896	1.53468e-05	C1_04500W_A	ICL1	Isocitrate lyase; glyoxylate cycle enzyme; required for virulence in mice; induced upon phagocytosis by macrophage; farnesol regulated; Pex5-dependent peroxisomal localization; stationary phase enriched; rat catheter, Spider biofilm induced
A0A1D8PTW9	0.58337	0.000299647	CR_09100C_A	CR_09100C_A	Aldo-keto reductase; increased transcript associated with MDR1 overexpression, benomyl or long-term fluconazole treatment; overexpression does not affect drug or oxidative stress sensitivity; stationary phase enriched; flow biofim repressed
A0A1D8PPM1	0.584173	5.78523e-05	C6_01460C_A	C6_01460C_A	Ortholog(s) have chaperone binding activity, role in protein folding in endoplasmic reticulum, response to unfolded protein, ubiquitin-dependent ERAD pathway and endoplasmic reticulum lumen localization
A0A1D8PSJ5	0.588285	0.0499256	CR_03700C_A	CR_03700C_A	Ortholog of S. cerevisiae Spp41; protein involved in negative regulation of expression of spliceosome components PRP4 and PRP3 in S. cerevisiae; mutants are viable
Q5A8I5	0.593554	0.00849206	C6_03880W_A	C6_03880W_A	Has domain(s) with predicted oxidoreductase activity and role in metabolic process
A0A1D8PQ75	0.600084	0.00357376	C6_03620C_A	C6_03620C_A	Putative phenylacrylic acid decarboxylase; clade-associated gene expression
Q59WW3	0.600368	1.49252e-05	C6_00880W_A	PEX7	Ortholog(s) have peroxisome matrix targeting signal-2 binding activity, role in fatty acid metabolic process, protein import into peroxisome matrix, docking, protein targeting to peroxisome and cytosol, peroxisome localization
Q5AK88	0.611743	3.10793e-06	C5_04470C_A	C5_04470C_A	Predicted RNA binding protein; stationary phase enriched; induced in core caspofungin response; induced by nitric oxide independent of Yhb1; repressed in ssr1 null; ketoconazole, hypoxia induced; Spider biofilm induced
Q59QW9	0.61326	0.0351943	C6_04320C_A	C6_04320C_A	Ortholog of C. dubliniensis CD36 : Cd36_64660, C. parapsilosis CDC317 : CPAR2_601110, Candida tenuis NRRL Y-1498 : CANTEDRAFT_119969 and Debaryomyces hansenii CBS767 : DEHA2A05896g
O94038	0.623712	4.75623e-09	C1_08330C_A	ADH2	Alcohol dehydrogenase; soluble in hyphae; expression regulated by white-opaque switching; regulated by Ssn6; indued by Mnl1 in weak acid stress; protein enriched in stationary phase yeast cultures; Spider biofilm induced
A0A1D8PQ54	0.653948	1.78425e-06	C6_03320W_A	C6_03320W_A	Stationary phase enriched protein; Gcn4-regulated; induced by amino acid starvation (3-AT), benomyl or in azole-resistant strain that overexpresses MDR1; flow model biofilm induced; rat catheter biofilm repressed; overlaps orf19.5621
A0A1D8PID4	0.656522	2.84434e-05	C2_09260C_A	GLO2	Ortholog(s) have hydroxyacylglutathione hydrolase activity, role in methylglyoxal catabolic process to D-lactate via S-lactoyl-glutathione and cytoplasm localization
A0A1D8PQ84	0.658219	0.0413503	C6_03630W_A	PAD1	Putative phenylacrylic acid decarboxylase; repressed by Rgt1p
A0A1D8PHH2	0.661871	6.33968e-07	C2_05660W_A	PNG2	Putative peptide:N-glycanase; gene has variable numbers of 12-bp repeats; induced by caspofungin, ciclopirox olamine, ketoconazole or hypoxia; gene of core caspofungin response; Hap43-induced; Spider biofilm induced
A0A1D8PGE7	0.663882	0.0180313	C2_01540W_A	C2_01540W_A	S. pombe ortholog SPCC576.01c is a predicted sulfonate dioxygenase; possibly transcriptionally regulated upon hyphal formation; Spider biofilm induced
Q5AFN8	0.665333	0.00163165	C7_00860W_A	SSR1	Beta-glucan associated ser/thr rich cell-wall protein with a role in cell wall structure; GPI anchor; highly mutable due to internal Ser-Ala tandem repeats; detected at germ tube plasma membrane; repressed in cells treated with Congo Red;
A0A1D8PI53	0.671571	0.0469358	C2_08450W_A	C2_08450W_A	Ortholog of C. dubliniensis CD36 : Cd36_22580, C. parapsilosis CDC317 : CPAR2_406960, C. auris B8441 : B9J08_005066 and Candida tenuis NRRL Y-1498 : CANTEDRAFT_113677
Q59WE1	0.687343	0.0196568	C1_07400C_A	C1_07400C_A	Ortholog of C. dubliniensis CD36 : Cd36_06910, C. parapsilosis CDC317 : CPAR2_208560, C. auris B8441 : B9J08_001617 and Candida tenuis NRRL Y-1498 : CANTEDRAFT_95854
A0A1D8PHF8	0.701437	9.67513e-08	C2_05180W_A	WH11	White-phase yeast transcript; expression in opaques increases virulence/switching; mutant switches as WT; Hap43, hypoxia, ketoconazol induced; required for RPMI biofilm; Bcr1-induced in RPMI a/a biofilm; rat catheter, Spider biofilm induced
A0A1D8PKD1	0.701911	3.65352e-05	C3_05710W_A	RCT1	Fluconazole-induced protein; Ras1, Cyr1 repressed and Efg1 induced; regulated by Nrg1, Tup1, Tbf1, Ssn6; induced in oralpharyngeal candidasis; rat catheter biofilm repressed
Q5ABB1	0.703516	7.38358e-05	C1_00490C_A	TTR1	Putative glutaredoxin; described as a glutathione reductase; induced by human neutrophils and benomyl treatment; alkaline repressed; regulated by Gcn2 and Gcn4; required for virulence in mouse model; Spider biofilm induced
A0A1D8PDV1	0.706264	0.00325477	C1_06660W_A	C1_06660W_A	Protein of unknown function; regulated by osmotic stress via Hog1 and oxidative stress (Hog1- and Cap1-independent); induced by alpha pheromone in SpiderM medium; Spider biofilm induced
A0A1D8PRN1	0.709274	0.000340148	CR_00290W_A	CR_00290W_A	Ortholog of S. cerevisiae Rts3; a component of the protein phosphatase type 2A complex; Plc1-regulated; induced in core caspofungin response; Spider biofilm induced
Q59PS7	0.714877	0.0243554	CR_05750W_A	CR_05750W_A	Predicted glycosyl hydrolase; hypoxia induced; flow model biofilm induced
A0A1D8PNP4	0.729868	3.48764e-07	C5_03490C_A	C5_03490C_A	Stationary phase enriched protein; predicted ORF from Assembly 19; removed from Assembly 20; subsequently reinstated in Assembly 21 based on comparative genome analysis
A0A1D8PER8	0.733031	6.29283e-10	C1_10040W_A	ERO1	Ortholog of S. cerevisiae Ero1; role in formation of disulfide bonds in the endoplasmic reticulum; fluconazole-induced; induced by Mnl1 under weak acid stress; Spider biofilm induced
Q59ZI2	0.739484	0.0216931	C2_05060C_A	C2_05060C_A	Putative sulfiredoxin; regulated by Tsa1, Tsa1B in minimal media at 37 degrees C; flow model biofilm induced; Spider biofilm induced
A0A1D8PGR9	0.758446	2.44148e-05	C2_02980C_A	DLD1	Putative D-lactate dehydrogenase; white cell-specific trancript; colony morphology-related gene regulation by Ssn6; Hap43-repressed; rat catheter biofilm induced; Spider biofilm repressed
Q59QN6	0.767145	3.11352e-05	CR_05170C_A	FDH1	Formate dehydrogenase; oxidizes formate to CO2; Mig1 regulated; induced by macrophages; fluconazole-repressed; repressed by Efg1 in yeast, not hyphal conditions; stationary phase enriched; rat catheter and Spider biofilm induced
A0A1D8PJA8	0.78884	8.612e-06	C3_01550C_A	TOS1	Protein similar to alpha agglutinin anchor subunit; secreted; exogenously expressed protein is a substrate for Kex2 processing in vitro; fluconazole-induced; induced by alpha pheromone in SpiderM medium; Hap43-induced
Q59NP5	0.792736	0.000262379	C6_00820W_A	SUN41	Cell wall glycosidase; role in biofilm formation and cell separation; possibly secreted; hypoxia, hyphal induced; caspofungin repressed; Efg1, Cph1 regulated; O-glycosylated, possible Kex2 substrate; 5'-UTR intron; Spider biofilm induced
Q5AKU5	0.801624	0.00132184	C1_13940W_A	SIM1	Adhesin-like protein; involved in cell wall maintenance, redundant with Sun41; possibly secreted; macrophage-repressed; repressed by Rim101, Cyr1, Ras1; Spider biofilm induced
A0A1D8PLV4	0.805801	0.0349183	C4_03500C_A	C4_03500C_A	Protein of unknown function; regulated by Tsa1, Tsa1B in minimal media at 37 degrees C
A0A1D8PRR3	0.80715	5.23173e-09	CR_00560W_A	NTH1	Neutral trehalase; hyphal induction in mutant delayed but not reduced overall; not required for virulence in mice; possible regulatory cAMP-dependent phosphorylation at S10,S213; Hap43-repressed gene; Spider biofilm induced
A0A1D8PEZ0	0.815335	0.0399713	C1_10740C_A	ASR1	Heat shock protein; transcript regulated by cAMP, osmotic stress, ciclopirox olamine, ketoconazole; repressed by Cyr1, Ras1; colony morphology-related regulated by Ssn6; stationary phase enriched; Hap43-induced; Spider biofilm induced
A0A1D8PFZ1	0.821604	0.006454	C2_00010W_A	TLO5	Member of a family of telomere-proximal genes of unknown function; may be spliced in vivo
Q5A1D3	0.823866	0.0351943	C4_06480C_A	CEK1	ERK-family protein kinase; required for wild-type yeast-hypha switch, mating efficiency, virulence in mice; Cst20-Hst7-Cek1-Cph1 MAPK pathway regulates mating, and invasive hyphal growth under some conditions; Spider biofilm induced
A0A1D8PQE6	0.836211	1.19177e-07	C6_04420W_A	C6_04420W_A	Protein of unknown function; GlcNAc-induced protein; Spider biofilm induced; rat catheter biofilm repressed
A0A1D8PRG2	0.862467	0.0273067	C7_03780C_A	C7_03780C_A	Has domain(s) with predicted catalytic activity, nitronate monooxygenase activity and role in oxidation-reduction process
A0A1D8PD55	0.888027	0.00155711	C1_03990W_A	C1_03990W_A	Ortholog(s) have proteasome binding activity and role in cellular response to arsenic-containing substance, proteasome-mediated ubiquitin-dependent protein catabolic process
A0A1D8PDP4	0.905637	2.53039e-09	C1_05510C_A	RPS27A	Ribosomal protein S27; rat catheter and Spider biofilm induced
A0A1D8PQ07	0.90691	0.00839848	C6_02890C_A	HPD1	3-hydroxypropionate dehydrogenase; involved in degradation of toxic propionyl-CoA; rat catheter and Spider biofilm induced
P0CY29	0.917586	0.0117806	C3_05230W_A	SAP3	Secreted aspartyl proteinase, acts in utilization of protein as nitrogen source; assessment of virulence role complicated by URA3 effects; regulated by growth phase; produced by opaque phase cells; alpha-pheromone repressed
Q5A345	0.953287	0.045392	CR_08500W_A	CR_08500W_A	Ortholog(s) have unfolded protein binding activity and role in protein import into nucleus, ribosomal large subunit biogenesis
Q59SF7	0.981071	0.020225	C2_08870C_A	PIR1	1,3-beta-glucan-linked cell wall protein; N-mannosylated, O-glycosylated by Pmt1; cell wall defect in het mutant; Hog1/fluconazole/hypoxia induced; iron/Efg1/Plc1/temp regulated; flow model biofilm induced; hyphal, Spider biofilm repressed
A0A1D8PP39	1.05084	3.09515e-05	C5_04940W_A	C5_04940W_A	Maltase; induced during growth on sucrose; induced by alpha pheromone in SpiderM medium; early-stage flow model biofilm indced
Q59ZH5	1.09498	0.000587735	C2_05130W_A	C2_05130W_A	Putative protein of unknown function; Hap43p-repressed gene
Q5AJC5	1.10369	0.0117462	C3_01800C_A	C3_01800C_A	Ortholog of Dig2, a MAP kinase-responsive inhibitor of Ste12; regulates mating-specific genes and invasive growth in S. cerevisiae; induced by alpha pheromone in SpiderM medium
Q5A061	1.11983	0.0379355	CR_03810W_A	PRP13	Putative integral inner mitochondrial membrane protein with similarity to exonucleases
A0A1D8PDR2	1.12164	0.0145813	C1_06130C_A	HAC1	bZIP transcription factor; role in unfolded protein response and control of morphology; transcript undergoes atypical splicing at C terminus under ER stress; induced during mating and by caspofungin; mRNA binds She3; Spider biofilm induced
A0A1D8PIL9	1.14566	0.0107036	C2_09830C_A	C2_09830C_A	Ortholog of C. parapsilosis CDC317 : CPAR2_407330, C. auris B8441 : B9J08_001010, Candida tenuis NRRL Y-1498 : CANTEDRAFT_114646 and Debaryomyces hansenii CBS767 : DEHA2B05654g
A0A1D8PMM0	1.15879	0.00299142	C4_06690C_A	C4_06690C_A	Ortholog(s) have role in cellular response to DNA damage stimulus, proteasome assembly, ubiquitin-dependent protein catabolic process and cytoplasm, nucleus localization
Q59VM4	1.38473	0.00187806	C1_04330W_A	RPN4	C2H2 transcription factor; putative regulator of proteasome genes; DNA recognition sequence (GAAGGCAAAA) enriched in regions upstream of proteasome genes; induced in core stress response; Hap43-induced; Spider biofilm induced
A0A1D8PDI1	1.59968	0.0350678	C1_05190C_A	C1_05190C_A	Protein with a NADH-ubiquinone oxidoreductase B18 subunit domain; gene has intron
Q5A7S0	1.66924	0.0361634	C3_00610W_A	C3_00610W_A	Putative conserved oligomeric Golgi complex subunit; decreased transcription is observed upon fluphenazine treatment
A0A1D8PGQ5	1.71375	0.0340311	C2_02920W_A	C2_02920W_A	Putative adhesin-like protein; upregulated during growth in the mouse cecum; flow model, rat catheter and Spider biofilm induced
A0A1D8PHL7	1.72973	0.0370098	C2_06290C_A	ATP14	Putative mitochondrial F1F0 ATP synthase subunit; macrophage/pseudohyphal-induced
Q59Q33	1.82083	2.65109e-06	C2_06550W_A	C2_06550W_A	Ortholog of C. parapsilosis CDC317 : CPAR2_201960, C. dubliniensis CD36 : Cd36_20900, Candida metapsilosis : CMET_3324 and Candida tropicalis NEW ASSEMBLY : CTRG1_04756

## Sheet: effect of Dox
Protein ID (Uniprot)	Log2ratio sth1/STH1-MYC (+Dox/-Dox)	Qvalue	Systematic gene name	Standard name	Description
Q5ALV9	-0.26835	0.00342016	C2_01590W_A	COX13	Cytochrome c oxidase; flucytosine induced; repressed by nitric oxide
A0A1D8PFD4	-0.243262	0.0432327	C1_12320C_A	ATP19	Subunit k of the mitochondrial F1F0 ATP synthase; a large enzyme complex required for ATP synthesis; Spider biofilm repressed
Q59RQ1	-0.231884	0.0182456	CR_07370W_A	CR_07370W_A	Ortholog of C. dubliniensis CD36 : Cd36_33000, C. parapsilosis CDC317 : CPAR2_701740, C. auris B8441 : B9J08_000567 and Candida tenuis NRRL Y-1498 : CANTEDRAFT_93887
Q9B8D8	-0.224426	0.02853	CM_00030W	COX2	Subunit II of cytochrome c oxidase, which is the terminal member of the mitochondrial inner membrane electron transport chain; one of three mitochondrially-encoded subunits
Q9B8C9	-0.215291	0.0149757	CM_00380W	NAD5	Subunit 5 of NADH:ubiquinone oxidoreductase (NADH:ubiquinone dehydrogenase), a multisubunit enzyme complex (complex I) of the mitochondrial inner membrane that catalyzes the first step in mitochondrial respiration
A0A1D8PIN8	-0.203541	0.0365326	C2_10270W_A	PUS7	Pseudouridine synthase; catalyzes pseudouridylation in U2 snRNA, 5S rRNA, cytoplasmic tRNAs and in pre-tRNA(Tyr); F-12/CO2 early biofilm induced
A0A1D8PL02	-0.176796	0.0328559	C4_00330C_A	C4_00330C_A	Ortholog(s) have proton-transporting ATP synthase activity, rotational mechanism, structural molecule activity and role in ATP synthesis coupled proton transport, cristae formation, protein complex oligomerization
Q59MV9	-0.155665	0.00659329	CR_07790C_A	YHB1	Nitric oxide dioxygenase; acts in nitric oxide scavenging/detoxification; role in virulence in mouse; transcript activated by NO, macrophage interaction; Hap43, hypha repressed; mRNA binds She3
A0A1D8PEH4	-0.153733	0.016466	C1_09020W_A	C1_09020W_A	Putative reductase or dehydrogenase; Hap43-repressed gene; alkaline repressed
A0A1D8PGP3	-0.143663	0.0365326	C2_02680W_A	PDR17	Fungal-specific protein (no human or murine homolog); role in sensitivity to fluconazole, specifically
P87206	-0.132356	0.00399191	C1_01350C_A	TIF	Translation initiation factor; upregulated in highly virulent strain compared to less virulent strain; antigenic in human; flucytosine induced; downregulated upon phagocytosis by macrophages; Spider biofilm repressed
Q5ADP7	-0.127436	0.0232448	C3_07060W_A	FESUR1	Putative ubiquinone reductase; transcriptionally induced by interaction with macrophage; alkaline downregulated; repressed by nitric oxide; clade-associated gene expression; Hap43p-repressed gene
Q59R21	-0.12471	0.040796	C7_03650W_A	C7_03650W_A	Ortholog(s) have histidinol-phosphatase activity and role in histidine biosynthetic process
A0A1D8PEA2	-0.118185	0.0185088	C1_08010W_A	DPM1	Dolichol-phosphate mannose synthase catalytic subunit; filament induced; Tup1-regulated; flow model and rat catheter biofilm repressed
Q5AGC7	-0.0889392	0.0296868	C5_02440C_A	C5_02440C_A	Ortholog(s) have protein serine/threonine kinase activity
Q5A5U4	-0.0722593	0.0466675	C4_04050C_A	RHD3	GPI-anchored yeast-associated cell wall protein; induced in high iron; clade-associated gene expression; not essential for cell wall integrity; fluconazole-repressed; flow model and Spider biofilm repressed
Q5AK79	-0.0271008	0.0266727	C5_04570C_A	URA7	CTP synthase 1; flucytosine induced; protein present in exponential and stationary growth phase yeast cultures
A0A1D8PU80	-0.0237045	0.045358	CR_10400W_A	CR_10400W_A	Ortholog(s) have peptide alpha-N-acetyltransferase activity, peptide-glutamate-N-acetyltransferase activity, peptide-serine-N-acetyltransferase activity
Q8NJN3	-0.00987652	0.0220118	C1_04290C_A	ACS2	Acetyl-CoA synthetase; antigenic during human and murine infection; induced by Efg1; macrophage-induced protein; soluble protein in hyphae; gene contains intron; flow model and Spider biofilm repressed
Q5A0V9	-0.00894019	0.0313026	C4_06720W_A	NOP1	Nucleolar protein; flucytosine induced; Hap43-induced; Spider biofilm repressed
A0A1D8PS32	-0.00613757	0.02501	CR_01820W_A	CR_01820W_A	Ortholog(s) have ribosomal large subunit binding, tRNA binding activity and role in peptide biosynthetic process, rescue of stalled ribosome, ribosome-associated ubiquitin-dependent protein catabolic process
A0A1D8PCD0	0.00321887	0.0211567	C1_00940W_A	RPB11	Putative RNA polymerase II subunit; flucytosine induced
Q59R20	0.0207715	0.0323871	C7_03660C_A	C7_03660C_A	Protein with similarity to amino acid-tRNA ligase; stationary phase enriched protein; GlcNAc-induced protein
A0A1D8PE53	0.0235354	0.0417866	C1_07870C_A	SMI1	Cell wall biosynthesis protein; Hap43, caspofungin-repressed; Cyr1-induced in hyphal cells; reduced biofilm cell wall glucan in mutant; possibly essential (UAU1 method); flow model biofilm induced
A0A1D8PCV7	0.0259357	0.0417543	C1_02820W_A	LYS2	Heterodimeric alpha-aminoadipate reductase large subunit; lysine biosynthesis; predicted binding sites for AMP and alpha-aminoadipate; inhibited by lys or thialysine; regulated by Gcn2 and Gcn4; Spider biofilm induced, flow model repressed
Q59RL1	0.0406298	0.0224634	C6_00330C_A	GNP1	Similar to asparagine and glutamine permease; fluconazole, caspofungin induced; regulated by Nrg1, Mig1, Tup1, Gcn2, Gcn4, and alkaline regulated by Rim101; repressed during chlamydospore formation; rat catheter, flow model biofilm induced
Q59RQ4	0.0447865	0.0235939	CR_07390C_A	MRPL8	Mitochondrial 60S ribosomal protein subunit; Hap43p-repressed gene
Q5AI30	0.0678956	0.0401342	C1_03280W_A	C1_03280W_A	Ortholog(s) have structural constituent of ribosome activity and mitochondrial small ribosomal subunit localization
A0A1D8PQQ9	0.0706177	0.00102363	C7_00950W_A	YML6	Putative mitochondrial ribosomal protein; induced upon adherence to polystyrene
Q5A6K5	0.085985	0.0164476	CR_04580W_A	CR_04580W_A	Ortholog(s) have structural constituent of ribosome activity and mitochondrial large ribosomal subunit localization
Q59TZ8	0.086162	0.0115403	CR_07150W_A	GLK1	Putative glucokinase; transcript regulated upon yeast-hyphal switch; Efg1 regulated; fluconazole-induced; induced in core stress response; colony morphology-related gene regulation by Ssn6; GlcNAc-induced protein
Q59YH5	0.102414	0.00907891	C5_01700W_A	C5_01700W_A	Mitochondrial ribosomal protein of the large subunit; rat catheter biofilm induced
A0A1D8PP43	0.109128	0.00916354	C5_05050W_A	ADH1	Alcohol dehydrogenase; oxidizes ethanol to acetaldehyde; at yeast cell surface; immunogenic in humans/mice; complements S. cerevisiae adh1 adh2 adh3 mutant; fluconazole, farnesol-induced; flow model biofilm induced; Spider biofilm repressed
Q59R18	0.121426	0.0145146	C7_03670W_A	DED81	Putative tRNA-Asn synthetase; genes encoding ribosomal subunits, translation factors, tRNA synthetases are downregulated upon phagocytosis by murine macrophage; protein enriched in stationary phase yeast cultures
A0A1D8PMA4	0.146365	0.0399079	C4_05310W_A	C4_05310W_A	Ortholog of S. cerevisiae : MRX12, C. glabrata CBS138 : CAGL0J11110g, C. dubliniensis CD36 : Cd36_44970, C. parapsilosis CDC317 : CPAR2_500860 and C. auris B8441 : B9J08_003204
Q59QC1	0.149014	0.0497817	C1_08520C_A	C1_08520C_A	Ortholog(s) have structural constituent of ribosome activity and mitochondrial large ribosomal subunit localization
Q5AF44	0.149466	0.000553703	C4_02410C_A	AHP1	Alkyl hydroperoxide reductase; immunogenic; fluconazole-induced; amphotericin B, caspofungin, alkaline repressed; core stress response induced; Ssk1/Nrg1/Tup1/Ssn6/Hog1 regulated; flow model biofilm induced; rat catheter biofilm repressed
Q59MT3	0.176385	0.0031908	CR_06770C_A	CR_06770C_A	Putative L-azetidine-2-carboxylic acid acetyltransferase; mutants are viable
A0A1D8PPD0	0.183037	0.049023	C6_00270W_A	C6_00270W_A	Has domain(s) with predicted role in attachment of GPI anchor to protein and GPI-anchor transamidase complex localization
P83779	0.192445	0.0302101	C4_06570C_A	PDC11	Pyruvate decarboxylase; antigenic; on hyphal not yeast cell surface; Hap43, Gcn4, Efg1, Efh1, Hsf1 regulated; fluconazole, farnesol induced; amino acid starvation repressed; flow model biofilm induced; Spider biofilm repressed
A0A1D8PLY4	0.256861	0.0185088	C4_03940C_A	PYC2	Putative pyruvate carboxylase; binds biotin cofactor; repressed by Ssk1 response regulator, by benomyl treatment, or in an azole-resistant strain overexpressing MDR1; stationary phase enriched protein; flow model biofilm repressed
O94038	1.97412	0.0132112	C1_08330C_A	ADH2	Alcohol dehydrogenase; soluble in hyphae; expression regulated by white-opaque switching; regulated by Ssn6; indued by Mnl1 in weak acid stress; protein enriched in stationary phase yeast cultures; Spider biofilm induced
A0A1D8PP03	3.61969	0.0342928	C5_04480C_A	C5_04480C_A	Has domain(s) with predicted nucleic acid binding, nucleotide binding activity
