# Supplementary material for: The RSC (Remodels the Structure of Chromatin) complex of Candida albicans shows compositional divergence with distinct roles in regulating pathogenic traits
Source: PLoS Genet. 2020 Nov 5;16(11):e1009071. doi: 10.1371/journal.pgen.1009071 (PMC7671503; doi:10.1371/journal.pgen.1009071)
Supplement: S5 Table — (XLSX) [file pgen.1009071.s014.xlsx]

## Sheet: GSEA sth1 RNAseq neg
NAME	SIZE	ES	NES	NOM p-val	FDR q-val	FWER p-val	RANK AT MAX	LEADING EDGE
CCR4_DN	38	-0.507153	-2.80235	0	0	0	324	tags=63%, list=26%, signal=82%
ERR1_SGA	28	-0.525212	-2.62678	0	0.00492359	0.007	310	tags=64%, list=25%, signal=83%
FHL1_TF	42	-0.449521	-2.57725	0	0.00565346	0.012	692	tags=98%, list=55%, signal=210%
SKO1_UP	99	-0.340173	-2.4706	0	0.0138429	0.039	582	tags=75%, list=46%, signal=128%
HYPHAE FBS37 (NANTEL)_DN	23	-0.521354	-2.45149	0	0.0142093	0.05	406	tags=74%, list=32%, signal=107%
GSH1_SGA	28	-0.475111	-2.42396	0	0.0156431	0.064	514	tags=82%, list=41%, signal=136%
STRUCTURAL CONSTITUENT OF RIBOSOME_MOL	43	-0.423382	-2.42028	0	0.014631	0.07	601	tags=86%, list=48%, signal=159%
MED31_DN	26	-0.478914	-2.39325	0	0.0156929	0.086	309	tags=65%, list=25%, signal=85%
RHE30_UP	38	-0.427101	-2.39298	0	0.0139492	0.086	403	tags=63%, list=32%, signal=90%
GENES REPRESSED BY RAPAMYCIN	70	-0.358898	-2.38378	0	0.0132809	0.091	391	tags=56%, list=31%, signal=76%
HU_2H_DN	32	-0.452966	-2.38266	0	0.0120736	0.091	440	tags=75%, list=35%, signal=112%
IFH1_TF	37	-0.444871	-2.35803	0	0.0132337	0.108	692	tags=97%, list=55%, signal=210%
BIOFILMBATCH_DN	39	-0.420494	-2.35406	0	0.0124325	0.108	692	tags=95%, list=55%, signal=204%
RHE90_UP	45	-0.396004	-2.34395	0	0.0129813	0.12	473	tags=71%, list=38%, signal=110%
HAP1P_TFMOTIF	21	-0.520082	-2.32668	0	0.0146036	0.142	367	tags=71%, list=29%, signal=99%
DCP2-7_SGA	27	-0.477327	-2.30505	0	0.0178938	0.183	467	tags=78%, list=37%, signal=121%
RIBOSOME_CEL	48	-0.374072	-2.23572	0	0.0311732	0.309	665	tags=90%, list=53%, signal=183%
CYTOSOLIC RIBOSOME (SENSU EUKARYOTA)_CEL	42	-0.391715	-2.22254	0	0.0333325	0.342	601	tags=83%, list=48%, signal=154%
CYTOSOLIC PART_CEL	42	-0.391715	-2.21525	0	0.0339932	0.366	601	tags=83%, list=48%, signal=154%
RPL20B_BIND	26	-0.454931	-2.20314	0	0.035494	0.391	665	tags=96%, list=53%, signal=200%
DOA1_SGA	43	-0.370761	-2.20126	0.00601202	0.0344091	0.396	332	tags=51%, list=26%, signal=67%
QCR8_SGA	68	-0.326854	-2.19394	0	0.0362049	0.428	639	tags=79%, list=51%, signal=153%
TBF1_TF	45	-0.383572	-2.19225	0.00194553	0.0348123	0.429	692	tags=91%, list=55%, signal=195%
RPL18B_BIND	21	-0.480614	-2.19047	0	0.0337767	0.434	665	tags=100%, list=53%, signal=208%
SER2_SGA	15	-0.538698	-2.16514	0.0019305	0.0407143	0.508	542	tags=93%, list=43%, signal=162%
TRANSLATION_BIO	56	-0.341928	-2.16233	0	0.0403636	0.519	691	tags=89%, list=55%, signal=189%
RPL6B_BIND	24	-0.446865	-2.13504	0	0.0474619	0.602	665	tags=96%, list=53%, signal=199%
CAP2_DN	78	-0.306364	-2.13279	0.00203666	0.0468385	0.608	442	tags=56%, list=35%, signal=82%
ENERGY DERIVATION BY OXIDATION OF ORGANIC COMPOUNDS_BIO	30	-0.41276	-2.12398	0.00408163	0.0479239	0.632	442	tags=70%, list=35%, signal=105%
ALG9_SGA	61	-0.332881	-2.11377	0.00199601	0.0508453	0.661	418	tags=54%, list=33%, signal=77%
YOR228C_SGA	18	-0.506373	-2.10905	0.00407332	0.051253	0.681	321	tags=67%, list=25%, signal=88%
MITOCHONDRION_CEL	70	-0.306405	-2.08915	0.00398406	0.0570254	0.724	442	tags=54%, list=35%, signal=79%
BBC1_SGA	16	-0.5202	-2.08851	0	0.0556834	0.728	520	tags=88%, list=41%, signal=147%
RPS1A_BIND	23	-0.446474	-2.07865	0.00191939	0.0584226	0.757	665	tags=96%, list=53%, signal=199%
LARGE RIBOSOMAL SUBUNIT_CEL	24	-0.44617	-2.07482	0	0.0581027	0.762	531	tags=83%, list=42%, signal=141%
WHITE_UP	21	-0.451879	-2.05647	0.00610998	0.0650557	0.813	443	tags=71%, list=35%, signal=108%
RAD14_SGA	16	-0.499598	-2.04195	0.0039604	0.071092	0.852	306	tags=63%, list=24%, signal=82%
RPD3_SGA	65	-0.30981	-2.03756	0	0.071556	0.866	437	tags=55%, list=35%, signal=80%
TYE7-DOWN	37	-0.368698	-2.03322	0.00583658	0.0719672	0.873	397	tags=59%, list=32%, signal=84%
HYPHAE_UP	37	-0.368217	-2.02633	0.00206612	0.0741134	0.884	256	tags=46%, list=20%, signal=56%
GPI16_DAMP_SGA	22	-0.446529	-2.02409	0	0.0739862	0.891	594	tags=86%, list=47%, signal=161%
OST2_DAMP_SGA	38	-0.373917	-2.01898	0	0.0745618	0.904	206	tags=39%, list=16%, signal=46%
XS(2006)_UP	103	-0.274031	-2.01613	0	0.0743836	0.911	453	tags=54%, list=36%, signal=78%
CYTOSOL_CEL	61	-0.311329	-2.01078	0.00197239	0.075844	0.919	546	tags=69%, list=43%, signal=116%
EUKARYOTIC 48S INITIATION COMPLEX_CEL	18	-0.460849	-1.99961	0.00410678	0.0803665	0.936	628	tags=94%, list=50%, signal=186%
MAE1_SGA	21	-0.437464	-1.99073	0.00792079	0.0837659	0.948	674	tags=95%, list=54%, signal=202%
PTH1_SGA	48	-0.33218	-1.98736	0.00378788	0.0842057	0.955	464	tags=60%, list=37%, signal=92%
RPS25A_SGA	15	-0.513142	-1.98439	0.00195695	0.0843844	0.958	134	tags=47%, list=11%, signal=52%
PRT1-1_SGA	18	-0.48234	-1.98193	0.0020202	0.0840099	0.961	167	tags=44%, list=13%, signal=51%
RPL11B_BIND	17	-0.479066	-1.98096	0.00587084	0.0830994	0.962	665	tags=100%, list=53%, signal=209%
RPL22A_SGA	15	-0.511467	-1.98014	0	0.0818918	0.962	114	tags=47%, list=9%, signal=51%
HTD2_SGA	24	-0.424063	-1.97801	0.00217391	0.081635	0.965	235	tags=50%, list=19%, signal=60%
CAD1P_TFMOTIF	93	-0.271575	-1.97461	0	0.0822864	0.97	493	tags=58%, list=39%, signal=88%
SKT5_SGA	22	-0.430014	-1.9746	0.00194932	0.0807626	0.97	435	tags=68%, list=35%, signal=102%
RPL25_BIND	31	-0.387784	-1.97352	0.00384615	0.0798938	0.97	665	tags=90%, list=53%, signal=187%
NAP1_SGA	31	-0.384699	-1.97241	0.00583658	0.0790823	0.971	182	tags=39%, list=14%, signal=44%
RPL36A_BIND	25	-0.409093	-1.97239	0.00590551	0.0776949	0.971	665	tags=92%, list=53%, signal=191%
CYTOSOLIC LARGE RIBOSOMAL SUBUNIT (SENSU EUKARYOTA)_CEL	22	-0.434241	-1.97136	0.0139721	0.077145	0.971	531	tags=82%, list=42%, signal=139%
BMDM PHAGOCYTOSIS_UP	95	-0.272209	-1.96887	0.00198807	0.0774301	0.973	302	tags=42%, list=24%, signal=51%
TOM1_SGA	30	-0.387683	-1.96826	0.00809717	0.0763752	0.973	628	tags=87%, list=50%, signal=169%
PHO4-UP	110	-0.260154	-1.96683	0	0.0760361	0.975	233	tags=34%, list=19%, signal=38%
EUKARYOTIC 43S PREINITIATION COMPLEX_CEL	18	-0.460849	-1.96663	0.00990099	0.0748788	0.975	628	tags=94%, list=50%, signal=186%
LSM4_DAMP_SGA	30	-0.382556	-1.96661	0	0.0736902	0.975	674	tags=90%, list=54%, signal=189%
GENERATION OF PRECURSOR METABOLITES AND ENERGY_BIO	33	-0.369071	-1.96591	0	0.0727619	0.976	577	tags=79%, list=46%, signal=142%
SNF6-UP-37C	219	-0.222219	-1.96275	0.00196464	0.0730465	0.978	308	tags=35%, list=24%, signal=38%
HAP3_SGA	21	-0.451038	-1.962	0	0.0722673	0.978	652	tags=95%, list=52%, signal=194%
ARO2_SGA	25	-0.41508	-1.95496	0.00576923	0.0749063	0.983	179	tags=40%, list=14%, signal=46%
RLP7_DAMP_SGA	25	-0.412535	-1.95189	0.00203666	0.0753599	0.985	521	tags=76%, list=41%, signal=127%
DEP1_SGA	83	-0.269892	-1.94641	0.00196464	0.0775879	0.988	634	tags=72%, list=50%, signal=136%
TYE7_TF	63	-0.296132	-1.93463	0.00386847	0.0826174	0.989	583	tags=73%, list=46%, signal=129%
RCO1_SGA	24	-0.409543	-1.93379	0.00564972	0.0819971	0.989	374	tags=58%, list=30%, signal=81%
ATP10_SGA	22	-0.424839	-1.93162	0	0.0819878	0.989	503	tags=73%, list=40%, signal=119%
RPL6A_BIND	26	-0.409399	-1.93073	0.00416667	0.0813138	0.989	665	tags=92%, list=53%, signal=192%
CYT1_SGA	19	-0.434226	-1.9228	0.00984252	0.0846846	0.99	332	tags=58%, list=26%, signal=77%
GI COLONIZATION-UP	70	-0.292795	-1.92258	0	0.083688	0.99	256	tags=40%, list=20%, signal=47%
FRA1_SGA	20	-0.436751	-1.92112	0.00204499	0.083282	0.991	193	tags=45%, list=15%, signal=52%
CHROMATIN MODIFICATION_BIO	15	-0.491402	-1.91852	0.00389864	0.0837975	0.993	63	tags=27%, list=5%, signal=28%
COENZYME METABOLIC PROCESS_BIO	17	-0.462963	-1.91723	0.0105485	0.0834387	0.993	685	tags=100%, list=54%, signal=216%
RPS6A_BIND	32	-0.357802	-1.91478	0	0.0836894	0.994	679	tags=88%, list=54%, signal=185%
XDJ1_SGA	18	-0.451564	-1.91467	0.012	0.0826957	0.994	262	tags=56%, list=21%, signal=69%
CYTOSOLIC SMALL RIBOSOMAL SUBUNIT (SENSU EUKARYOTA)_CEL	18	-0.460849	-1.9014	0.0059761	0.089538	0.997	628	tags=94%, list=50%, signal=186%
KETOCONAZOLE_DN	25	-0.398785	-1.89781	0.00587084	0.0907248	0.997	247	tags=48%, list=20%, signal=59%
CDC5_9H_DN	28	-0.377421	-1.89728	0.00769231	0.0898532	0.997	691	tags=93%, list=55%, signal=201%
RPS15_BIND	19	-0.438281	-1.89603	0.00996016	0.0896331	0.997	665	tags=95%, list=53%, signal=198%
RPS5_BIND	23	-0.408571	-1.89042	0.00963391	0.091836	0.997	665	tags=91%, list=53%, signal=190%
COX6_SGA	18	-0.441486	-1.88951	0.00994036	0.0912866	0.997	594	tags=89%, list=47%, signal=166%
CELLULAR BIOSYNTHETIC PROCESS_BIO	58	-0.299782	-1.87941	0.00198807	0.0971621	0.998	484	tags=60%, list=38%, signal=94%
VPS51_SGA	37	-0.34261	-1.87883	0.00573614	0.0964135	0.998	643	tags=81%, list=51%, signal=161%
RSC1_BIND	16	-0.462154	-1.87313	0.010101	0.098386	0.998	412	tags=69%, list=33%, signal=101%
RPL20A_BIND	28	-0.374058	-1.86734	0.0102669	0.101276	0.998	665	tags=93%, list=53%, signal=192%
RPL36B_BIND	25	-0.393999	-1.86684	0.0116279	0.100462	0.998	509	tags=72%, list=40%, signal=118%
RTT103_SGA	18	-0.434173	-1.86601	0.00984252	0.0998969	0.998	201	tags=44%, list=16%, signal=52%
TFP1_SGA	64	-0.284208	-1.85931	0.00193424	0.103627	0.998	182	tags=30%, list=14%, signal=33%
RPS7A_BIND	29	-0.362931	-1.8592	0.00193798	0.102602	0.998	667	tags=90%, list=53%, signal=186%
RPL3_BIND	33	-0.350078	-1.85725	0.00990099	0.102868	0.998	665	tags=88%, list=53%, signal=181%
HAP5_SGA	25	-0.384553	-1.85542	0.0161616	0.103089	0.998	456	tags=68%, list=36%, signal=104%
RPS19B_SGA	31	-0.365014	-1.85373	0.00828157	0.103074	0.998	592	tags=77%, list=47%, signal=143%
XS(HOG1)_UP	109	-0.241725	-1.85145	0	0.103451	0.998	452	tags=52%, list=36%, signal=75%
CWT1_EXPPHASE_UP	18	-0.441525	-1.84985	0.0114943	0.103387	0.998	546	tags=83%, list=43%, signal=145%
ISW2_SGA	26	-0.375912	-1.84738	0.00961539	0.103864	0.998	411	tags=58%, list=33%, signal=84%
LST4_SGA	18	-0.439237	-1.84651	0.015625	0.103354	0.998	484	tags=72%, list=38%, signal=116%
TYE7-BOUND-PEREZ	57	-0.291686	-1.84438	0.00205339	0.104002	0.998	583	tags=72%, list=46%, signal=128%
TIM13_SGA	25	-0.372893	-1.82137	0.0241187	0.119879	1	167	tags=36%, list=13%, signal=41%
PUS4_SGA	15	-0.455607	-1.81962	0.0134875	0.119819	1	193	tags=47%, list=15%, signal=54%
RPS7B_BIND	21	-0.40567	-1.8155	0.0078125	0.122095	1	665	tags=90%, list=53%, signal=189%
ALG5_SGA	20	-0.403261	-1.8132	0.0117188	0.122954	1	391	tags=60%, list=31%, signal=86%
ERV15_SGA	24	-0.387347	-1.81301	0.0130841	0.121966	1	521	tags=75%, list=41%, signal=126%
RPL16B_BIND	25	-0.383788	-1.813	0.0135135	0.120863	1	665	tags=88%, list=53%, signal=183%
COX10_SGA	35	-0.337691	-1.8124	0.0100402	0.120278	1	652	tags=83%, list=52%, signal=167%
SGF73_BIND	23	-0.383061	-1.8123	0.0183673	0.119291	1	270	tags=48%, list=21%, signal=60%
RPL7B_BIND	20	-0.413538	-1.8048	0.00584795	0.123989	1	665	tags=95%, list=53%, signal=198%
GIM4_SGA	47	-0.304275	-1.79967	0.014553	0.126869	1	321	tags=43%, list=25%, signal=55%
NEW1_SGA	30	-0.347369	-1.79927	0.0141414	0.126077	1	592	tags=77%, list=47%, signal=141%
PET122_SGA	16	-0.442967	-1.79324	0.0178571	0.129336	1	201	tags=50%, list=16%, signal=59%
ESTABLISHMENT AND/OR MAINTENANCE OF CHROMATIN ARCHITECTURE_BIO	18	-0.427098	-1.79061	0.00954198	0.13023	1	63	tags=22%, list=5%, signal=23%
SCC2-4_SGA	18	-0.425254	-1.78934	0.0176817	0.130033	1	505	tags=72%, list=40%, signal=119%
DNA PACKAGING_BIO	18	-0.427098	-1.78455	0.0117878	0.132985	1	63	tags=22%, list=5%, signal=23%
RPS3_BIND	28	-0.354578	-1.78381	0.00965251	0.132376	1	665	tags=89%, list=53%, signal=185%
VTC1_SGA	19	-0.403641	-1.7825	0.0160643	0.132257	1	509	tags=74%, list=40%, signal=122%
CYTOSKELETON ORGANIZATION AND BIOGENESIS_BIO	19	-0.414077	-1.78075	0.0203666	0.132509	1	275	tags=47%, list=22%, signal=60%
MGM1_SGA	32	-0.337673	-1.779	0.0116054	0.132812	1	367	tags=53%, list=29%, signal=73%
HOC1_SGA	37	-0.318193	-1.77661	0.0235294	0.133471	1	402	tags=51%, list=32%, signal=73%
SKN7_SGA	15	-0.453834	-1.776	0.0162933	0.132882	1	516	tags=93%, list=41%, signal=156%
YPT31_SGA	35	-0.330355	-1.77471	0.0118812	0.132861	1	761	tags=91%, list=60%, signal=225%
PEX12_SGA	27	-0.361398	-1.76008	0.0122951	0.144576	1	385	tags=56%, list=31%, signal=78%
SUV3_SGA	24	-0.372916	-1.75554	0.0193798	0.147469	1	365	tags=54%, list=29%, signal=75%
VID22_SGA	23	-0.373827	-1.7554	0.0158103	0.146498	1	501	tags=70%, list=40%, signal=113%
PUB1_SGA	16	-0.425459	-1.75522	0.0201207	0.145464	1	268	tags=50%, list=21%, signal=63%
THR4_SGA	37	-0.320018	-1.75522	0.0116959	0.144336	1	489	tags=62%, list=39%, signal=99%
RPS30A_BIND	24	-0.360967	-1.75438	0.025	0.144076	1	674	tags=92%, list=54%, signal=194%
PUT3P_TFMOTIF	26	-0.361548	-1.75347	0.0140281	0.143829	1	289	tags=46%, list=23%, signal=59%
NUP133_SGA	47	-0.294974	-1.75308	0.0135659	0.142976	1	408	tags=51%, list=32%, signal=73%
WHI3_SGA	35	-0.329362	-1.7522	0.00806452	0.142771	1	607	tags=77%, list=48%, signal=145%
CDC48-2_SGA	37	-0.320025	-1.75188	0.0133843	0.141983	1	652	tags=81%, list=52%, signal=163%
FYV10_SGA	24	-0.366507	-1.74856	0.0365385	0.14371	1	576	tags=75%, list=46%, signal=136%
RPL15A_BIND	19	-0.409013	-1.7461	0.0194553	0.144737	1	665	tags=95%, list=53%, signal=198%
LIP2_SGA	17	-0.415216	-1.73984	0.0232068	0.149021	1	150	tags=35%, list=12%, signal=40%
RTS2_DAMP_SGA	26	-0.360342	-1.73956	0.0184426	0.148182	1	521	tags=73%, list=41%, signal=122%
AMINO ACID AND DERIVATIVE METABOLIC PROCESS_BIO	36	-0.324341	-1.73897	0.013308	0.147669	1	642	tags=78%, list=51%, signal=154%
HUR1_SGA	30	-0.335683	-1.73837	0.0193424	0.147187	1	605	tags=80%, list=48%, signal=150%
IWR1_SGA	22	-0.374168	-1.73448	0.0141129	0.149582	1	467	tags=68%, list=37%, signal=106%
MITOCHONDRIAL PART_CEL	44	-0.290167	-1.73105	0.0128913	0.151821	1	682	tags=82%, list=54%, signal=172%
RPL10_BIND	29	-0.34197	-1.72576	0.0177515	0.155503	1	634	tags=83%, list=50%, signal=163%
BIM1_BIND	18	-0.412571	-1.72303	0.0328542	0.156889	1	72	tags=22%, list=6%, signal=23%
MITOCHONDRIAL MEMBRANE_CEL	26	-0.355536	-1.72238	0.0188285	0.156386	1	442	tags=62%, list=35%, signal=93%
RPL17A_BIND	24	-0.378788	-1.7221	0.0316206	0.155589	1	665	tags=92%, list=53%, signal=191%
HOC1_BIND	16	-0.434264	-1.71872	0.0304878	0.157521	1	187	tags=44%, list=15%, signal=51%
SKI3_SGA	16	-0.421657	-1.71633	0.0182927	0.158647	1	542	tags=81%, list=43%, signal=141%
PSD1_SGA	61	-0.270567	-1.71421	0.0102249	0.159656	1	551	tags=64%, list=44%, signal=108%
AIM22_SGA	20	-0.387163	-1.71096	0.0211946	0.161556	1	650	tags=90%, list=52%, signal=183%
SGN1_SGA	16	-0.418249	-1.71057	0.030426	0.160864	1	404	tags=69%, list=32%, signal=100%
NCS6_SGA	27	-0.341055	-1.70958	0.023622	0.1608	1	402	tags=59%, list=32%, signal=85%
RPN11-14_SGA	45	-0.290748	-1.70846	0.00992064	0.16074	1	521	tags=62%, list=41%, signal=102%
GIM4_DAMP_SGA	15	-0.423847	-1.70756	0.0271845	0.160413	1	105	tags=33%, list=8%, signal=36%
IRA2_SGA	62	-0.261697	-1.70642	0.00592885	0.160492	1	435	tags=48%, list=35%, signal=70%
SWI5_BIND	16	-0.417147	-1.70416	0.0178218	0.161487	1	87	tags=31%, list=7%, signal=33%
UFD1-2_SGA	21	-0.373356	-1.69799	0.0316832	0.166199	1	105	tags=29%, list=8%, signal=31%
RPS1B_BIND	29	-0.343697	-1.69659	0.0219561	0.166343	1	689	tags=90%, list=55%, signal=193%
AMINO ACID METABOLIC PROCESS_BIO	35	-0.317358	-1.69606	0.029106	0.165691	1	642	tags=77%, list=51%, signal=153%
PAT1_SGA	48	-0.278697	-1.6852	0.0160966	0.17559	1	643	tags=75%, list=51%, signal=147%
SMALL RIBOSOMAL SUBUNIT_CEL	20	-0.394105	-1.68281	0.0343434	0.176952	1	628	tags=90%, list=50%, signal=177%
MACROMOLECULE BIOSYNTHETIC PROCESS_BIO	84	-0.234922	-1.68053	0.008	0.17837	1	678	tags=76%, list=54%, signal=154%
RPS4A_BIND	18	-0.394049	-1.68033	0.0307692	0.177487	1	667	tags=94%, list=53%, signal=198%
MLP1_SGA	15	-0.419553	-1.67839	0.042471	0.178361	1	374	tags=60%, list=30%, signal=84%
KRE1_SGA	16	-0.413483	-1.67736	0.0210325	0.178288	1	589	tags=88%, list=47%, signal=162%
MSS2_SGA	20	-0.37976	-1.67613	0.0234375	0.178523	1	94	tags=30%, list=7%, signal=32%
NO_DN	22	-0.367502	-1.67369	0.0345489	0.179854	1	576	tags=77%, list=46%, signal=140%
ACT1_BIND	17	-0.396057	-1.67103	0.0413386	0.181359	1	615	tags=82%, list=49%, signal=159%
MITOCHONDRIAL ENVELOPE_CEL	31	-0.326328	-1.6677	0.0247423	0.183531	1	442	tags=58%, list=35%, signal=87%
ORGANELLE INNER MEMBRANE_CEL	23	-0.351159	-1.66599	0.0258964	0.184275	1	442	tags=61%, list=35%, signal=92%
SHR3_DAMP_SGA	39	-0.292019	-1.66125	0.0285714	0.188011	1	643	tags=77%, list=51%, signal=152%
ATG11_SGA	16	-0.405634	-1.65857	0.043222	0.189627	1	375	tags=63%, list=30%, signal=88%
PET20_SGA	18	-0.396411	-1.65577	0.0371134	0.191351	1	639	tags=89%, list=51%, signal=178%
RPL1A_BIND	21	-0.372494	-1.65553	0.0378486	0.190489	1	665	tags=90%, list=53%, signal=189%
SSB1_BIND	51	-0.27238	-1.65521	0.0272904	0.189694	1	527	tags=61%, list=42%, signal=100%
CA21CHR3X3	33	-0.309281	-1.65284	0.0329457	0.191199	1	304	tags=39%, list=24%, signal=51%
SLM1_SGA	24	-0.353882	-1.65207	0.0318091	0.191008	1	124	tags=29%, list=10%, signal=32%
EMI1_SGA	41	-0.285864	-1.65162	0.0154739	0.190305	1	201	tags=32%, list=16%, signal=37%
SAS4_SGA	15	-0.423321	-1.6514	0.0286885	0.189426	1	469	tags=73%, list=37%, signal=115%
PKC1-4_SGA	46	-0.282511	-1.65095	0.021611	0.188804	1	600	tags=70%, list=48%, signal=128%
CELLULAR RESPIRATION_BIO	16	-0.401683	-1.65076	0.0506073	0.187974	1	639	tags=94%, list=51%, signal=188%
CDC37-1_SGA	18	-0.379364	-1.65012	0.0504202	0.187585	1	408	tags=67%, list=32%, signal=97%
APQ12_SGA	39	-0.293135	-1.64991	0.0245747	0.186794	1	151	tags=28%, list=12%, signal=31%
NUG1-2_SGA	34	-0.303793	-1.6497	0.0316832	0.186035	1	174	tags=29%, list=14%, signal=33%
OST3_SGA	20	-0.377335	-1.64868	0.031746	0.186023	1	175	tags=40%, list=14%, signal=46%
COFACTOR METABOLIC PROCESS_BIO	19	-0.380806	-1.64369	0.0366795	0.190111	1	685	tags=95%, list=54%, signal=205%
UBC6_SGA	21	-0.36938	-1.64248	0.0365385	0.190455	1	484	tags=67%, list=38%, signal=106%
CHK1_SGA	16	-0.418689	-1.64202	0.0403226	0.189929	1	204	tags=44%, list=16%, signal=52%
UBP3_SGA	50	-0.272517	-1.64	0.0168421	0.191064	1	294	tags=38%, list=23%, signal=48%
UBR1_SGA	20	-0.372248	-1.63957	0.0452675	0.190493	1	542	tags=80%, list=43%, signal=138%
ATP11_SGA	62	-0.25326	-1.63869	0.0218688	0.190316	1	531	tags=58%, list=42%, signal=95%
CYR1_YEAST_DN	68	-0.249608	-1.63471	0.0139442	0.193318	1	650	tags=75%, list=52%, signal=147%
RSC4-2_SGA	23	-0.356298	-1.63425	0.0446097	0.192784	1	539	tags=74%, list=43%, signal=127%
SEH1_SGA	41	-0.298503	-1.63318	0.0262626	0.193034	1	518	tags=63%, list=41%, signal=104%
ECM33_SGA	36	-0.303778	-1.63147	0.0411985	0.194009	1	542	tags=69%, list=43%, signal=118%
YBR141C_SGA	34	-0.30956	-1.63089	0.0323887	0.19355	1	590	tags=74%, list=47%, signal=135%
PHB1_SGA	28	-0.327089	-1.62871	0.0378486	0.194742	1	592	tags=75%, list=47%, signal=138%
YIL083C_DAMP_SGA	20	-0.373878	-1.62869	0.036961	0.193802	1	601	tags=80%, list=48%, signal=151%
AEROBIC RESPIRATION_BIO	16	-0.401683	-1.6266	0.0330739	0.195026	1	639	tags=94%, list=51%, signal=188%
MITOCHONDRIAL INNER MEMBRANE_CEL	23	-0.351159	-1.62615	0.039604	0.194438	1	442	tags=61%, list=35%, signal=92%
CDC3-3_SGA	54	-0.257278	-1.62237	0.0265306	0.197472	1	662	tags=76%, list=53%, signal=153%
YTA7_BIND	20	-0.372634	-1.62153	0.0451745	0.197475	1	174	tags=30%, list=14%, signal=34%
ASE1_SGA	16	-0.401718	-1.61935	0.0625	0.198816	1	385	tags=63%, list=31%, signal=89%
ATP18_SGA	17	-0.388301	-1.61869	0.0410678	0.198532	1	201	tags=41%, list=16%, signal=48%
RPL13B_BIND	19	-0.374815	-1.61441	0.0456274	0.202049	1	665	tags=89%, list=53%, signal=187%
GPI1-1_SGA	20	-0.367172	-1.60512	0.0405405	0.2119	1	490	tags=65%, list=39%, signal=105%
OMS1_SGA	33	-0.303354	-1.6038	0.0277228	0.21245	1	476	tags=61%, list=38%, signal=95%
YJL068C_SGA	17	-0.379934	-1.60287	0.0376238	0.212428	1	140	tags=35%, list=11%, signal=39%
CAB1_DAMP_SGA	25	-0.339485	-1.60133	0.043222	0.213167	1	406	tags=56%, list=32%, signal=81%
RPS6A_SGA	19	-0.373574	-1.60043	0.0558559	0.21309	1	189	tags=37%, list=15%, signal=43%
RPS6B_SGA	19	-0.373387	-1.59999	0.039924	0.212572	1	797	tags=100%, list=63%, signal=268%
DER1_SGA	24	-0.34482	-1.59949	0.0371094	0.212041	1	617	tags=83%, list=49%, signal=160%
HYPOXIA_SYNNOTT_DN	33	-0.303258	-1.59326	0.0376238	0.218231	1	276	tags=42%, list=22%, signal=53%
MGE1-100_SGA	19	-0.367457	-1.59263	0.0518234	0.218075	1	365	tags=53%, list=29%, signal=73%
CKB2_SGA	30	-0.307286	-1.5913	0.0434783	0.218657	1	167	tags=33%, list=13%, signal=38%
LSM3_DAMP_SGA	33	-0.300213	-1.59026	0.0292969	0.218809	1	464	tags=58%, list=37%, signal=89%
SVL3_SGA	26	-0.326193	-1.5869	0.0390947	0.221496	1	211	tags=38%, list=17%, signal=45%
SGF73_SGA	21	-0.353169	-1.58683	0.039924	0.22052	1	201	tags=38%, list=16%, signal=45%
MSA2_SGA	16	-0.401448	-1.58523	0.0419162	0.221351	1	761	tags=100%, list=60%, signal=250%
HTA1_BIND	24	-0.340556	-1.58465	0.0501002	0.220985	1	92	tags=21%, list=7%, signal=22%
PAC11_SGA	29	-0.31316	-1.58451	0.0392157	0.220179	1	693	tags=86%, list=55%, signal=187%
RAD18_SGA	21	-0.350569	-1.58299	0.0362173	0.22088	1	516	tags=67%, list=41%, signal=111%
ATP12_SGA	19	-0.356428	-1.58161	0.0376984	0.221463	1	511	tags=68%, list=41%, signal=113%
PAM18-1_SGA	15	-0.401265	-1.58008	0.0591716	0.222095	1	338	tags=53%, list=27%, signal=72%
SIN3_SGA	48	-0.265042	-1.57722	0.0403226	0.224596	1	201	tags=29%, list=16%, signal=33%
ALCOHOL METABOLIC PROCESS_BIO	18	-0.369766	-1.56988	0.0683112	0.23207	1	236	tags=44%, list=19%, signal=54%
YPL109C_SGA	18	-0.375504	-1.56809	0.0491159	0.233233	1	794	tags=100%, list=63%, signal=267%
LGE1_SGA	33	-0.294469	-1.56764	0.0438247	0.232704	1	167	tags=27%, list=13%, signal=31%
RAD4_SGA	19	-0.37486	-1.56584	0.0427699	0.233903	1	444	tags=63%, list=35%, signal=96%
DOA1_BIND	29	-0.314467	-1.5645	0.043152	0.234313	1	539	tags=69%, list=43%, signal=118%
RPS30A_SGA	19	-0.358836	-1.56306	0.0645161	0.234937	1	674	tags=89%, list=54%, signal=190%
CEM1_SGA	38	-0.276426	-1.56092	0.0419048	0.23658	1	634	tags=76%, list=50%, signal=149%
SNF6-CHIP-30C	82	-0.226284	-1.55784	0.0224033	0.239025	1	400	tags=46%, list=32%, signal=63%
RPL23A_SGA	18	-0.376857	-1.55733	0.0519231	0.238582	1	500	tags=67%, list=40%, signal=109%
SUS1_SGA	30	-0.303609	-1.55622	0.0603291	0.238862	1	153	tags=30%, list=12%, signal=33%
LIPID BIOSYNTHETIC PROCESS_BIO	15	-0.403124	-1.55292	0.0767677	0.242056	1	685	tags=93%, list=54%, signal=202%
ACT1-125_SGA	27	-0.313869	-1.55243	0.0478927	0.241537	1	167	tags=33%, list=13%, signal=38%
SRN2_BIND	20	-0.351974	-1.55158	0.0431211	0.241558	1	198	tags=35%, list=16%, signal=41%
SSY1_DAMP_SGA	31	-0.30418	-1.55144	0.0613497	0.240692	1	177	tags=32%, list=14%, signal=37%
PMR1_SGA	62	-0.238739	-1.54617	0.056338	0.246186	1	545	tags=61%, list=43%, signal=103%
VAM10_SGA	21	-0.342051	-1.5457	0.0524194	0.245758	1	542	tags=71%, list=43%, signal=123%
DIA2_SGA	26	-0.31448	-1.5456	0.0578842	0.244866	1	592	tags=73%, list=47%, signal=135%
TMS1_SGA	23	-0.340574	-1.54553	0.0416667	0.243947	1	464	tags=61%, list=37%, signal=95%
AMINO ACID BIOSYNTHETIC PROCESS_BIO	21	-0.336694	-1.53939	0.0558882	0.250759	1	642	tags=81%, list=51%, signal=162%
CDC10-4_SGA	34	-0.288035	-1.53566	0.058	0.254429	1	500	tags=62%, list=40%, signal=100%
GAL4_DN	28	-0.310082	-1.53553	0.0575816	0.253569	1	348	tags=50%, list=28%, signal=68%
TAF6-TS_SGA	23	-0.326727	-1.53184	0.0474308	0.257361	1	639	tags=78%, list=51%, signal=156%
PAA1_SGA	34	-0.288054	-1.53026	0.038835	0.258185	1	456	tags=56%, list=36%, signal=85%
NITROGEN COMPOUND BIOSYNTHETIC PROCESS_BIO	21	-0.336694	-1.52778	0.0584677	0.26042	1	642	tags=81%, list=51%, signal=162%
ABD1-5_SGA	39	-0.275522	-1.52613	0.0643863	0.261391	1	97	tags=21%, list=8%, signal=22%
NCR1_SGA	19	-0.354588	-1.52524	0.0747475	0.261468	1	550	tags=74%, list=44%, signal=129%
RIA1_SGA	35	-0.289885	-1.52306	0.0610236	0.26336	1	636	tags=77%, list=51%, signal=152%
MDL1_SGA	21	-0.342696	-1.52112	0.0509165	0.264996	1	418	tags=57%, list=33%, signal=84%
SWD3_BIND	22	-0.334799	-1.52089	0.0649606	0.264273	1	270	tags=41%, list=21%, signal=51%
CWT1_STATPHASE_UP	28	-0.300892	-1.51982	0.0594059	0.264622	1	521	tags=68%, list=41%, signal=113%
NAT4_SGA	22	-0.328008	-1.51791	0.0666667	0.265956	1	618	tags=82%, list=49%, signal=158%
AMINE BIOSYNTHETIC PROCESS_BIO	21	-0.336694	-1.51596	0.0630081	0.267463	1	642	tags=81%, list=51%, signal=162%
SSK2_SGA	20	-0.346027	-1.51509	0.0769231	0.267589	1	687	tags=90%, list=55%, signal=195%
OAR1_SGA	22	-0.335985	-1.5137	0.0583501	0.268419	1	435	tags=59%, list=35%, signal=89%
PCK1_SGA	22	-0.333837	-1.51034	0.0679612	0.271672	1	634	tags=82%, list=50%, signal=162%
TYE7-DOWN-HPX	77	-0.21848	-1.50967	0.0456432	0.271519	1	548	tags=57%, list=44%, signal=95%
APL1_SGA	23	-0.324635	-1.50843	0.0666667	0.272292	1	385	tags=52%, list=31%, signal=74%
KGD2_SGA	29	-0.302377	-1.50826	0.0669371	0.271435	1	693	tags=86%, list=55%, signal=187%
SEC13-1_SGA	17	-0.363156	-1.50704	0.0672098	0.272	1	508	tags=71%, list=40%, signal=117%
MSS1_SGA	37	-0.270766	-1.50618	0.072549	0.272078	1	211	tags=30%, list=17%, signal=35%
PDR1_SGA	24	-0.31856	-1.50526	0.0563107	0.272174	1	628	tags=83%, list=50%, signal=163%
VAM6_BIND	15	-0.385852	-1.5038	0.0495049	0.27319	1	780	tags=100%, list=62%, signal=260%
GLC7_DAMP_SGA	50	-0.244423	-1.50231	0.0654206	0.274002	1	840	tags=90%, list=67%, signal=260%
RXT2_BIND	24	-0.327935	-1.5002	0.0612648	0.275878	1	174	tags=33%, list=14%, signal=38%
STRUCTURAL MOLECULE ACTIVITY_MOL	64	-0.226452	-1.49894	0.0473251	0.276531	1	665	tags=78%, list=53%, signal=157%
CA21CHR4X5	24	-0.318002	-1.49738	0.076	0.277539	1	453	tags=58%, list=36%, signal=89%
PHO23_SGA	59	-0.228071	-1.49738	0.0600414	0.276518	1	402	tags=44%, list=32%, signal=62%
YNL181W_DAMP_SGA	15	-0.38267	-1.49737	0.092803	0.275516	1	514	tags=73%, list=41%, signal=122%
FAR10_SGA	30	-0.289855	-1.49501	0.0653465	0.277501	1	415	tags=53%, list=33%, signal=78%
SCO1_SGA	17	-0.361323	-1.49493	0.0761719	0.27658	1	309	tags=47%, list=25%, signal=62%
YAR029W_SGA	16	-0.366278	-1.49474	0.0757576	0.275869	1	628	tags=81%, list=50%, signal=160%
DEG1_SGA	46	-0.247099	-1.49472	0.0569106	0.274889	1	487	tags=54%, list=39%, signal=85%
LSM6_BIND	32	-0.280348	-1.4946	0.0674603	0.274053	1	523	tags=63%, list=42%, signal=104%
VID24_SGA	20	-0.343131	-1.49311	0.0707269	0.274921	1	639	tags=80%, list=51%, signal=160%
PRP28-101_SGA	27	-0.31043	-1.49289	0.0693878	0.274176	1	452	tags=56%, list=36%, signal=85%
BAT1_SGA	25	-0.31418	-1.49216	0.0715746	0.274277	1	201	tags=32%, list=16%, signal=37%
ARP6_SGA	42	-0.259671	-1.49147	0.0452675	0.274328	1	175	tags=26%, list=14%, signal=29%
SCS7_SGA	53	-0.244749	-1.48924	0.0708661	0.276604	1	448	tags=51%, list=36%, signal=76%
POP4_DAMP_SGA	45	-0.254251	-1.48835	0.0805501	0.276756	1	384	tags=47%, list=31%, signal=65%
ENVELOPE_CEL	36	-0.2709	-1.48421	0.0612648	0.281382	1	442	tags=53%, list=35%, signal=79%
SPP381_DAMP_SGA	25	-0.306653	-1.48275	0.084507	0.282517	1	152	tags=28%, list=12%, signal=31%
RPN12-1_SGA	33	-0.279204	-1.4823	0.0850202	0.282101	1	436	tags=55%, list=35%, signal=81%
ORGANELLE ENVELOPE_CEL	36	-0.2709	-1.47915	0.0823293	0.28523	1	442	tags=53%, list=35%, signal=79%
YHC1-3_SGA	48	-0.24723	-1.47213	0.0766045	0.293628	1	600	tags=67%, list=48%, signal=123%
HU_6H_DN	26	-0.30865	-1.47046	0.083499	0.294835	1	546	tags=69%, list=43%, signal=120%
SIN4_SGA	77	-0.210893	-1.47043	0.0542636	0.293866	1	663	tags=69%, list=53%, signal=137%
CA21CHR1X3	25	-0.29813	-1.46634	0.0783505	0.298536	1	177	tags=32%, list=14%, signal=36%
TRP2_SGA	16	-0.361957	-1.46604	0.0945946	0.297879	1	494	tags=75%, list=39%, signal=122%
YLR301W_SGA	16	-0.360925	-1.46547	0.0898438	0.297602	1	205	tags=38%, list=16%, signal=44%
WHI5_SGA	25	-0.296025	-1.46338	0.0898438	0.29992	1	601	tags=72%, list=48%, signal=135%
SWS2_BIND	17	-0.352963	-1.46301	0.0828283	0.299486	1	255	tags=41%, list=20%, signal=51%
CA21CHR6X5	23	-0.317448	-1.46287	0.0923077	0.298674	1	229	tags=39%, list=18%, signal=47%
TSC13_DAMP_SGA	30	-0.287637	-1.46253	0.063197	0.298133	1	452	tags=57%, list=36%, signal=86%
GYP6_SGA	23	-0.310007	-1.46141	0.0749507	0.298658	1	279	tags=43%, list=22%, signal=55%
NOC3_DAMP_SGA	15	-0.375829	-1.46015	0.0903491	0.299399	1	174	tags=40%, list=14%, signal=46%
YCR016W_SGA	16	-0.361069	-1.45875	0.083499	0.300305	1	218	tags=38%, list=17%, signal=45%
TOF2_SGA	16	-0.3518	-1.45441	0.0843137	0.305628	1	576	tags=81%, list=46%, signal=148%
PRE9_SGA	17	-0.354944	-1.45304	0.0755467	0.306364	1	518	tags=71%, list=41%, signal=118%
RPL14A_BIND	19	-0.344159	-1.4524	0.0955056	0.306205	1	99	tags=26%, list=8%, signal=28%
SIN3_BIND	35	-0.268682	-1.44898	0.0941884	0.310142	1	184	tags=29%, list=15%, signal=33%
SPT8_BIND	15	-0.372034	-1.44892	0.0833333	0.309236	1	184	tags=40%, list=15%, signal=46%
MEK1_SGA	18	-0.339716	-1.44806	0.0998004	0.309498	1	245	tags=39%, list=19%, signal=48%
HIR2_SGA	17	-0.353932	-1.44636	0.0968421	0.310992	1	210	tags=35%, list=17%, signal=42%
RAD6_SGA	17	-0.349485	-1.44611	0.0862745	0.310326	1	174	tags=35%, list=14%, signal=40%
ANP1_SGA	108	-0.18865	-1.44468	0.0464646	0.311446	1	666	tags=69%, list=53%, signal=133%
SDS3_SGA	35	-0.265256	-1.4384	0.0833333	0.319651	1	201	tags=31%, list=16%, signal=36%
SMC3-1_SGA	16	-0.356337	-1.43829	0.0974155	0.318773	1	140	tags=31%, list=11%, signal=35%
TYS1-1_SGA	25	-0.300245	-1.43587	0.0745968	0.321401	1	608	tags=76%, list=48%, signal=144%
HPA2_SGA	15	-0.366635	-1.43311	0.0853175	0.324427	1	312	tags=47%, list=25%, signal=61%
RTG1-RTG3-BOUND- PEREZ	44	-0.24494	-1.43275	0.0715667	0.323966	1	452	tags=57%, list=36%, signal=86%
DEP1_BIND	31	-0.273417	-1.43273	0.0805501	0.322973	1	547	tags=65%, list=43%, signal=111%
CDC8-2_SGA	23	-0.310786	-1.4327	0.10101	0.32199	1	754	tags=91%, list=60%, signal=223%
STB1_SGA	17	-0.345951	-1.43177	0.0903733	0.322214	1	643	tags=82%, list=51%, signal=166%
AMINE METABOLIC PROCESS_BIO	40	-0.259503	-1.4304	0.0885827	0.323213	1	874	tags=95%, list=69%, signal=301%
RPL16A_BIND	20	-0.326006	-1.42988	0.0961924	0.3229	1	665	tags=85%, list=53%, signal=177%
DPB3_SGA	41	-0.255469	-1.4296	0.0977131	0.322341	1	554	tags=66%, list=44%, signal=114%
UBC4_SGA	21	-0.312139	-1.4279	0.109804	0.323935	1	794	tags=95%, list=63%, signal=254%
RSP5-3_SGA	19	-0.323393	-1.42424	0.0884086	0.328527	1	286	tags=42%, list=23%, signal=54%
HIR1_SGA	20	-0.320358	-1.41956	0.0977012	0.33435	1	338	tags=50%, list=27%, signal=67%
PAH1_SGA	16	-0.349704	-1.4188	0.113761	0.334447	1	411	tags=56%, list=33%, signal=82%
BMS1-1_SGA	27	-0.28949	-1.41818	0.0921305	0.334342	1	467	tags=59%, list=37%, signal=92%
HDA1_SGA	15	-0.351893	-1.41733	0.112621	0.334604	1	408	tags=60%, list=32%, signal=88%
ROM2_BIND	17	-0.353596	-1.41696	0.118908	0.334214	1	278	tags=35%, list=22%, signal=45%
LAT1_SGA	16	-0.342816	-1.41542	0.0965251	0.335613	1	174	tags=31%, list=14%, signal=36%
HMO1_SGA	30	-0.277024	-1.41537	0.11336	0.334674	1	273	tags=37%, list=22%, signal=46%
NMD2_SGA	22	-0.31321	-1.41285	0.0907298	0.337502	1	589	tags=77%, list=47%, signal=143%
VMA21_SGA	27	-0.288346	-1.41139	0.0963855	0.338598	1	309	tags=41%, list=25%, signal=53%
TOF1_SGA	26	-0.283543	-1.41051	0.10397	0.338844	1	476	tags=58%, list=38%, signal=91%
CA21CHR7X1	19	-0.322886	-1.40779	0.113636	0.341803	1	394	tags=58%, list=31%, signal=83%
YBR238C_SGA	21	-0.311638	-1.40758	0.104478	0.341091	1	332	tags=48%, list=26%, signal=64%
SWD1_BIND	19	-0.326044	-1.40692	0.109434	0.341026	1	615	tags=79%, list=49%, signal=152%
PSE1-41_SGA	15	-0.360159	-1.40631	0.115768	0.341041	1	153	tags=33%, list=12%, signal=37%
MMS22_SGA	17	-0.347116	-1.4046	0.109827	0.34243	1	114	tags=29%, list=9%, signal=32%
COX23_SGA	23	-0.302418	-1.40415	0.123077	0.342196	1	514	tags=65%, list=41%, signal=108%
RPL13A_SGA	17	-0.34767	-1.40316	0.128107	0.342733	1	643	tags=82%, list=51%, signal=166%
YTA7_SGA	22	-0.303284	-1.40127	0.118343	0.344675	1	408	tags=59%, list=32%, signal=86%
NITROGEN COMPOUND METABOLIC PROCESS_BIO	47	-0.228897	-1.40046	0.108696	0.344894	1	329	tags=38%, list=26%, signal=50%
YEL020C_SGA	22	-0.300205	-1.40044	0.111111	0.343922	1	89	tags=23%, list=7%, signal=24%
PAC10_BIND	20	-0.323648	-1.39956	0.117202	0.34426	1	105	tags=30%, list=8%, signal=32%
TEA1P_TFMOTIF	52	-0.22829	-1.39923	0.0945946	0.343708	1	546	tags=63%, list=43%, signal=107%
YHR020W_DAMP_SGA	19	-0.319664	-1.39912	0.11619	0.342834	1	452	tags=63%, list=36%, signal=97%
VMA8_SGA	35	-0.257266	-1.3983	0.0968421	0.343148	1	643	tags=74%, list=51%, signal=148%
YLR152C_SGA	16	-0.350264	-1.39717	0.109091	0.343943	1	366	tags=56%, list=29%, signal=78%
CIN2_SGA	18	-0.33297	-1.39671	0.10325	0.343674	1	201	tags=33%, list=16%, signal=39%
RPL26B_BIND	16	-0.353116	-1.39612	0.114943	0.343674	1	687	tags=88%, list=55%, signal=190%
RPL8A_SGA	20	-0.316626	-1.3959	0.118474	0.34301	1	156	tags=30%, list=12%, signal=34%
CLA4_SGA	20	-0.315275	-1.39265	0.0926641	0.346924	1	539	tags=70%, list=43%, signal=120%
SBH1_SGA	19	-0.320918	-1.38846	0.135659	0.352359	1	167	tags=32%, list=13%, signal=36%
BOS1-1_SGA	48	-0.230128	-1.38572	0.0975104	0.35571	1	643	tags=71%, list=51%, signal=139%
RIM101_NRG1_DN	37	-0.249051	-1.38462	0.0889749	0.356403	1	333	tags=41%, list=26%, signal=53%
COG3-1_SGA	78	-0.198871	-1.3816	0.0821643	0.359933	1	452	tags=47%, list=36%, signal=69%
RPC19_DAMP_SGA	23	-0.29687	-1.38059	0.121673	0.360596	1	201	tags=30%, list=16%, signal=36%
HPT1_SGA	19	-0.315894	-1.37495	0.120968	0.368234	1	652	tags=84%, list=52%, signal=172%
RFC5-1_SGA	19	-0.3179	-1.37212	0.11811	0.371664	1	321	tags=47%, list=25%, signal=63%
KEM1_SGA	25	-0.282956	-1.37174	0.131021	0.371246	1	167	tags=28%, list=13%, signal=32%
ERD1_SGA	25	-0.288579	-1.36771	0.11976	0.376582	1	109	tags=24%, list=9%, signal=26%
CHROMOSOME ORGANIZATION AND BIOGENESIS_BIO	31	-0.260446	-1.36686	0.106	0.376999	1	63	tags=13%, list=5%, signal=13%
AUR1_DAMP_SGA	35	-0.251401	-1.36597	0.115079	0.377536	1	861	tags=94%, list=68%, signal=290%
RPN10_SGA	19	-0.316724	-1.36037	0.108949	0.385462	1	803	tags=95%, list=64%, signal=258%
RPN4_SGA	35	-0.252255	-1.35995	0.151093	0.385053	1	761	tags=86%, list=60%, signal=211%
CBS2_SGA	23	-0.290003	-1.35757	0.147705	0.387911	1	663	tags=83%, list=53%, signal=171%
ACT1-124_SGA	29	-0.266844	-1.35381	0.140152	0.393015	1	110	tags=24%, list=9%, signal=26%
QCR9_SGA	22	-0.297185	-1.35354	0.126316	0.392432	1	408	tags=55%, list=32%, signal=79%
RRP1-1_SGA	25	-0.28078	-1.35278	0.141473	0.392686	1	436	tags=52%, list=35%, signal=78%
PSEUDOMONAS_DN	24	-0.289681	-1.35252	0.130252	0.392055	1	491	tags=63%, list=39%, signal=101%
BIOFILMBATCH_UP	35	-0.251969	-1.35186	0.13	0.39215	1	295	tags=40%, list=23%, signal=51%
CET1-15_SGA	24	-0.284409	-1.35082	0.135135	0.392853	1	455	tags=58%, list=36%, signal=90%
CLC1_SGA	69	-0.203569	-1.35077	0.108108	0.39187	1	652	tags=70%, list=52%, signal=136%
SEC61-2_SGA	33	-0.263689	-1.34835	0.126437	0.394843	1	201	tags=30%, list=16%, signal=35%
RPP0_BIND	22	-0.291647	-1.34799	0.149425	0.394359	1	542	tags=68%, list=43%, signal=118%
APL4_SGA	20	-0.304599	-1.34667	0.129845	0.395673	1	452	tags=60%, list=36%, signal=92%
URE2_SGA	20	-0.305661	-1.34648	0.139405	0.394917	1	514	tags=65%, list=41%, signal=108%
SLM4_SGA	23	-0.28731	-1.34394	0.129699	0.398387	1	518	tags=61%, list=41%, signal=102%
YPT6_SGA	41	-0.233109	-1.34381	0.0994036	0.39755	1	870	tags=93%, list=69%, signal=290%
ILM1_SGA	47	-0.228208	-1.34344	0.121154	0.397114	1	789	tags=87%, list=63%, signal=225%
ACT1-129_SGA	44	-0.233118	-1.34254	0.134122	0.397556	1	295	tags=36%, list=23%, signal=46%
CSE2_SGA	64	-0.206017	-1.34249	0.128257	0.39659	1	550	tags=59%, list=44%, signal=100%
HTA2_BIND	17	-0.325523	-1.34184	0.146718	0.396539	1	174	tags=24%, list=14%, signal=27%
COP1-1_SGA	38	-0.246257	-1.34075	0.135458	0.397284	1	650	tags=74%, list=52%, signal=148%
SRB2_SGA	45	-0.229807	-1.33965	0.144788	0.398174	1	609	tags=67%, list=48%, signal=125%
CHA4P_TFMOTIF	116	-0.174262	-1.33963	0.10338	0.39716	1	651	tags=66%, list=52%, signal=125%
SMT3_DAMP_SGA	16	-0.334003	-1.33748	0.163022	0.39963	1	435	tags=63%, list=35%, signal=94%
CHROMOSOME ORGANIZATION AND BIOGENESIS (SENSU EUKARYOTA)_BIO	31	-0.260446	-1.33713	0.139535	0.39912	1	63	tags=13%, list=5%, signal=13%
CTI6_SGA	39	-0.239527	-1.33635	0.128571	0.399308	1	179	tags=26%, list=14%, signal=29%
KRE11_SGA	16	-0.332046	-1.33544	0.164329	0.399793	1	436	tags=56%, list=35%, signal=85%
SWI3_SGA	63	-0.205331	-1.33523	0.124314	0.399133	1	182	tags=24%, list=14%, signal=26%
MAK16_DAMP_SGA	18	-0.318063	-1.33511	0.140684	0.398337	1	687	tags=83%, list=55%, signal=181%
RVS161_BIND	35	-0.245964	-1.33473	0.142857	0.397931	1	464	tags=54%, list=37%, signal=84%
SEC66_SGA	32	-0.251826	-1.33462	0.147638	0.397138	1	338	tags=44%, list=27%, signal=58%
CHO2_SGA	46	-0.225627	-1.33455	0.138672	0.396252	1	687	tags=78%, list=55%, signal=166%
GAL4_TF	29	-0.261961	-1.33298	0.147228	0.397754	1	577	tags=69%, list=46%, signal=124%
ERG3_BIND	31	-0.260653	-1.3311	0.141717	0.399847	1	463	tags=55%, list=37%, signal=85%
RPT2_DAMP_SGA	26	-0.274706	-1.33106	0.139265	0.398904	1	25	tags=15%, list=2%, signal=15%
RPL5_BIND	21	-0.299673	-1.32916	0.138614	0.401086	1	542	tags=71%, list=43%, signal=123%
DUO1-2_SGA	43	-0.228761	-1.32871	0.132924	0.400877	1	175	tags=26%, list=14%, signal=29%
ORGANIC ACID METABOLIC PROCESS_BIO	50	-0.2195	-1.32816	0.149909	0.400792	1	361	tags=42%, list=29%, signal=57%
CARBOXYLIC ACID METABOLIC PROCESS_BIO	50	-0.2195	-1.32663	0.144869	0.40221	1	361	tags=42%, list=29%, signal=57%
VPS5_SGA	16	-0.32942	-1.32602	0.15942	0.402332	1	182	tags=31%, list=14%, signal=36%
IES2_SGA	45	-0.225337	-1.3257	0.113095	0.401912	1	182	tags=27%, list=14%, signal=30%
SYS1_SGA	25	-0.272951	-1.32557	0.134269	0.4011	1	780	tags=88%, list=62%, signal=227%
SLY1-TS_SGA	18	-0.310118	-1.32513	0.153693	0.400803	1	411	tags=56%, list=33%, signal=81%
MSN5_SGA	15	-0.339174	-1.32224	0.145129	0.404562	1	156	tags=33%, list=12%, signal=38%
PMN PHAGOCYTOSIS_DN	43	-0.232607	-1.3221	0.164032	0.403826	1	628	tags=70%, list=50%, signal=134%
MIA40_DAMP_SGA	21	-0.302493	-1.32074	0.145418	0.405027	1	452	tags=57%, list=36%, signal=88%
HIR1_BIND	18	-0.309766	-1.32037	0.171315	0.404704	1	174	tags=33%, list=14%, signal=38%
CDC48-3_SGA	28	-0.263103	-1.32007	0.145558	0.404238	1	794	tags=89%, list=63%, signal=236%
OPI3_SGA	55	-0.209074	-1.31888	0.127016	0.405059	1	455	tags=49%, list=36%, signal=74%
TCO89_SGA	31	-0.257392	-1.31802	0.160321	0.405439	1	603	tags=71%, list=48%, signal=133%
HOM6_SGA	45	-0.227826	-1.31566	0.124521	0.408375	1	140	tags=22%, list=11%, signal=24%
MED7-163_SGA	24	-0.278141	-1.31366	0.155819	0.410646	1	236	tags=33%, list=19%, signal=40%
CA21CHR7X2	16	-0.329836	-1.31248	0.135593	0.411592	1	70	tags=25%, list=6%, signal=26%
VPS29_SGA	24	-0.278621	-1.31074	0.153846	0.413629	1	801	tags=92%, list=64%, signal=247%
GPI8-TS_SGA	44	-0.225466	-1.30918	0.160156	0.415318	1	794	tags=86%, list=63%, signal=226%
CA21CHR1X2	23	-0.282982	-1.30843	0.163498	0.415523	1	504	tags=61%, list=40%, signal=100%
RAD5_BIND	15	-0.329857	-1.30785	0.15873	0.415487	1	87	tags=27%, list=7%, signal=28%
CBF1_BIND	17	-0.310495	-1.30635	0.170385	0.417107	1	613	tags=76%, list=49%, signal=147%
CDC53_UP	45	-0.226061	-1.30388	0.166667	0.420208	1	442	tags=53%, list=35%, signal=79%
TLG2_SGA	30	-0.254233	-1.30327	0.180747	0.420151	1	452	tags=53%, list=36%, signal=81%
GYP1_SGA	28	-0.261841	-1.3027	0.148515	0.420119	1	851	tags=96%, list=68%, signal=291%
NAP1_BIND	22	-0.285006	-1.302	0.157588	0.420315	1	436	tags=55%, list=35%, signal=82%
ALG1-1_SGA	16	-0.31639	-1.30031	0.184358	0.422239	1	406	tags=50%, list=32%, signal=73%
SHE4_SGA	32	-0.246525	-1.29908	0.165669	0.423331	1	652	tags=78%, list=52%, signal=158%
MNN11_SGA	47	-0.213604	-1.29827	0.165657	0.423758	1	448	tags=49%, list=36%, signal=73%
RPS24B_SGA	16	-0.322636	-1.29631	0.178641	0.426157	1	628	tags=81%, list=50%, signal=160%
SEM1_SGA	15	-0.331144	-1.29606	0.173307	0.425569	1	218	tags=40%, list=17%, signal=48%
VPS4_SGA	20	-0.291639	-1.29564	0.18664	0.425301	1	174	tags=30%, list=14%, signal=34%
RSC2_BIND	24	-0.274474	-1.2956	0.187747	0.424389	1	92	tags=17%, list=7%, signal=18%
HAC1_SGA	23	-0.283223	-1.29513	0.170974	0.424137	1	291	tags=39%, list=23%, signal=50%
VMA5_SGA	24	-0.269177	-1.29206	0.160569	0.428234	1	761	tags=88%, list=60%, signal=217%
YDL133W_SGA	26	-0.276401	-1.28982	0.199601	0.43134	1	505	tags=62%, list=40%, signal=101%
THP2_SGA	20	-0.286478	-1.28527	0.165385	0.438138	1	508	tags=70%, list=40%, signal=115%
GID8_SGA	19	-0.302972	-1.28397	0.172481	0.43946	1	99	tags=21%, list=8%, signal=23%
RRI1_SGA	23	-0.27652	-1.28364	0.174089	0.438971	1	500	tags=61%, list=40%, signal=99%
SUT2_SGA	20	-0.28978	-1.28216	0.187879	0.440599	1	182	tags=30%, list=14%, signal=35%
VPS27_SGA	40	-0.229978	-1.27924	0.17154	0.444663	1	761	tags=85%, list=60%, signal=208%
BCY1_SGA	33	-0.245635	-1.27784	0.15444	0.445976	1	435	tags=52%, list=35%, signal=77%
PRP4-1_SGA	63	-0.197933	-1.27699	0.16185	0.446342	1	870	tags=90%, list=69%, signal=278%
ASC1_BIND	29	-0.255217	-1.27466	0.185547	0.449303	1	739	tags=83%, list=59%, signal=196%
SLX9_SGA	29	-0.247399	-1.27397	0.204499	0.449412	1	156	tags=28%, list=12%, signal=31%
SAC3_BIND	33	-0.245442	-1.27192	0.182903	0.45215	1	870	tags=94%, list=69%, signal=296%
YIR016W_SGA	36	-0.230935	-1.27184	0.182879	0.451307	1	527	tags=61%, list=42%, signal=102%
CA21CHR1X10	18	-0.296237	-1.27165	0.181275	0.45063	1	99	tags=22%, list=8%, signal=24%
YJR120W_SGA	25	-0.268517	-1.27158	0.170124	0.449752	1	687	tags=84%, list=55%, signal=181%
COX12_SGA	15	-0.321428	-1.27012	0.197505	0.451093	1	94	tags=27%, list=7%, signal=28%
SAP30_SGA	30	-0.252191	-1.2679	0.185031	0.453862	1	437	tags=50%, list=35%, signal=75%
CKB2_BIND	26	-0.25923	-1.26584	0.206897	0.456408	1	99	tags=23%, list=8%, signal=25%
LST4_BIND	15	-0.318328	-1.26565	0.197697	0.455728	1	864	tags=100%, list=69%, signal=315%
COG8_SGA	32	-0.246408	-1.26532	0.176125	0.455295	1	870	tags=94%, list=69%, signal=296%
CSF1_SGA	19	-0.300133	-1.26384	0.217557	0.456742	1	149	tags=32%, list=12%, signal=35%
MDM31_SGA	22	-0.278371	-1.26377	0.200758	0.455848	1	643	tags=77%, list=51%, signal=155%
OXIDOREDUCTASE ACTIVITY_MOL	64	-0.195082	-1.25953	0.160643	0.462463	1	163	tags=23%, list=13%, signal=26%
PRP16-TS_SGA	40	-0.221502	-1.25911	0.190019	0.462248	1	464	tags=55%, list=37%, signal=84%
CA21CHR3X2	19	-0.28549	-1.25908	0.198853	0.461276	1	207	tags=37%, list=16%, signal=43%
SEC22_SGA	41	-0.223582	-1.25754	0.212724	0.462805	1	509	tags=59%, list=40%, signal=95%
GWT1-20_SGA	42	-0.219704	-1.25688	0.186	0.463048	1	201	tags=26%, list=16%, signal=30%
BUL1_SGA	16	-0.311957	-1.25532	0.204322	0.464861	1	167	tags=31%, list=13%, signal=36%
LEU3P_TFMOTIF	19	-0.287832	-1.25409	0.201183	0.465918	1	303	tags=47%, list=24%, signal=61%
EMI2_SGA	26	-0.263358	-1.25377	0.195918	0.465496	1	521	tags=62%, list=41%, signal=103%
OXIDOREDUCTASE ACTIVITY, ACTING ON CH-OH GROUP OF DONORS_MOL	16	-0.308642	-1.25166	0.197318	0.468263	1	157	tags=31%, list=12%, signal=35%
CUP5_SGA	50	-0.207269	-1.25098	0.179337	0.468473	1	182	tags=24%, list=14%, signal=27%
ARC35-5_SGA	33	-0.236009	-1.25036	0.191939	0.468583	1	167	tags=24%, list=13%, signal=27%
KES1_SGA	30	-0.244777	-1.25023	0.190196	0.467803	1	134	tags=23%, list=11%, signal=25%
BUB3_SGA	39	-0.224689	-1.24948	0.187984	0.468206	1	456	tags=51%, list=36%, signal=78%
ORGANELLE MEMBRANE_CEL	74	-0.183597	-1.24901	0.190855	0.468101	1	442	tags=45%, list=35%, signal=65%
SRB2_BIND	26	-0.254778	-1.2396	0.184762	0.484399	1	125	tags=23%, list=10%, signal=25%
ARC15-10_SGA	33	-0.234092	-1.23802	0.185547	0.486343	1	152	tags=24%, list=12%, signal=27%
HSP30_SGA	16	-0.304171	-1.23739	0.230303	0.486469	1	110	tags=25%, list=9%, signal=27%
STU2-12_SGA	15	-0.306729	-1.23394	0.219653	0.492201	1	345	tags=47%, list=27%, signal=64%
SSC1-2_SGA	19	-0.28065	-1.23387	0.204365	0.491331	1	424	tags=53%, list=34%, signal=78%
CA21CHR6X1	27	-0.248476	-1.23114	0.209709	0.495261	1	533	tags=63%, list=42%, signal=107%
CDH1_SGA	33	-0.231203	-1.22981	0.224409	0.496587	1	684	tags=79%, list=54%, signal=168%
THR4_BIND	27	-0.247912	-1.22933	0.213178	0.496408	1	645	tags=74%, list=51%, signal=149%
UBI4_SGA	30	-0.23941	-1.2273	0.193424	0.499096	1	839	tags=93%, list=67%, signal=273%
CDC3-1_SGA	51	-0.204592	-1.22375	0.21322	0.504692	1	345	tags=39%, list=27%, signal=52%
RGD1_SGA	31	-0.233935	-1.22112	0.203922	0.508497	1	343	tags=42%, list=27%, signal=56%
CBP4_SGA	15	-0.308596	-1.22024	0.237911	0.509079	1	456	tags=60%, list=36%, signal=93%
GCN2_SGA	20	-0.28184	-1.22024	0.218569	0.508026	1	134	tags=25%, list=11%, signal=28%
OPI3_BIND	51	-0.204163	-1.21762	0.219665	0.512045	1	463	tags=51%, list=37%, signal=77%
FYV10_BIND	16	-0.296497	-1.21714	0.227273	0.511818	1	167	tags=31%, list=13%, signal=36%
TAF8-7_SGA	39	-0.214401	-1.21645	0.235887	0.512073	1	628	tags=67%, list=50%, signal=129%
JNM1_SGA	37	-0.219017	-1.21563	0.215842	0.512487	1	545	tags=62%, list=43%, signal=106%
TFA2-45_SGA	20	-0.274601	-1.21558	0.205882	0.511527	1	511	tags=65%, list=41%, signal=108%
ARP9-1_SGA	15	-0.3125	-1.21365	0.225806	0.514024	1	518	tags=67%, list=41%, signal=112%
EXO70_SGA	22	-0.263005	-1.21313	0.25	0.513966	1	870	tags=95%, list=69%, signal=304%
CSM1_SGA	51	-0.197662	-1.21285	0.217131	0.513532	1	456	tags=49%, list=36%, signal=74%
DIA2_BIND	21	-0.266245	-1.21196	0.226	0.514127	1	184	tags=29%, list=15%, signal=33%
GIM4_BIND	35	-0.221875	-1.21191	0.208081	0.513193	1	487	tags=54%, list=39%, signal=86%
CA21CHR4X3	24	-0.263702	-1.21071	0.241736	0.514433	1	180	tags=29%, list=14%, signal=33%
G2-M CLUSTER	15	-0.308493	-1.21008	0.237525	0.514486	1	383	tags=53%, list=30%, signal=76%
SSU72-2_SGA	24	-0.254651	-1.20999	0.2167	0.513605	1	428	tags=50%, list=34%, signal=74%
YEL057C_SGA	28	-0.239841	-1.20772	0.223382	0.51688	1	241	tags=32%, list=19%, signal=39%
PDE2_SGA	21	-0.269195	-1.20683	0.24948	0.517626	1	211	tags=33%, list=17%, signal=39%
DBF2_BIND	21	-0.263021	-1.20668	0.254032	0.516882	1	518	tags=62%, list=41%, signal=103%
JID1_SGA	32	-0.233616	-1.20665	0.228571	0.515892	1	508	tags=63%, list=40%, signal=102%
VPS41_SGA	18	-0.286579	-1.20572	0.251953	0.516557	1	827	tags=94%, list=66%, signal=271%
ION TRANSPORTER ACTIVITY_MOL	21	-0.268349	-1.20545	0.242248	0.516024	1	613	tags=76%, list=49%, signal=146%
HHT2_BIND	21	-0.267268	-1.20541	0.269006	0.515056	1	418	tags=48%, list=33%, signal=70%
CRN1_BIND	15	-0.299447	-1.20506	0.232514	0.514686	1	212	tags=33%, list=17%, signal=40%
GCR2_SGA	30	-0.233705	-1.20501	0.217143	0.513743	1	539	tags=60%, list=43%, signal=102%
GTR1_BIND	26	-0.250315	-1.20426	0.234086	0.514155	1	99	tags=19%, list=8%, signal=20%
CA21CHR7X3	28	-0.247678	-1.20387	0.231939	0.513848	1	242	tags=36%, list=19%, signal=43%
SST2_SGA	29	-0.241217	-1.20383	0.229862	0.512902	1	452	tags=52%, list=36%, signal=79%
DPH5_SGA	18	-0.289352	-1.20324	0.238921	0.512954	1	643	tags=78%, list=51%, signal=157%
RPS16A_SGA	16	-0.29662	-1.20177	0.251559	0.514657	1	628	tags=81%, list=50%, signal=160%
CYTOSKELETON_CEL	26	-0.246049	-1.20107	0.242248	0.514856	1	856	tags=92%, list=68%, signal=282%
YGL235W_BIND	18	-0.282723	-1.19929	0.229885	0.517344	1	204	tags=33%, list=16%, signal=39%
SOH1_SGA	33	-0.226382	-1.19844	0.241779	0.517945	1	634	tags=70%, list=50%, signal=137%
RPL17B_BIND	21	-0.271353	-1.19826	0.236948	0.517304	1	665	tags=81%, list=53%, signal=169%
BRE2_BIND	19	-0.271774	-1.19775	0.237525	0.517219	1	923	tags=100%, list=73%, signal=369%
LSM7_BIND	31	-0.226902	-1.19598	0.240602	0.519512	1	779	tags=84%, list=62%, signal=215%
LDB18_BIND	16	-0.301379	-1.19481	0.244	0.520755	1	524	tags=69%, list=42%, signal=116%
TAP42-11_SGA	20	-0.27305	-1.19444	0.229084	0.52038	1	193	tags=30%, list=15%, signal=35%
SLA1_SGA	27	-0.241881	-1.19404	0.241843	0.52012	1	788	tags=89%, list=63%, signal=233%
AGE2_SGA	16	-0.295887	-1.19386	0.245473	0.519449	1	784	tags=94%, list=62%, signal=245%
VMA21_BIND	15	-0.296148	-1.19248	0.255533	0.521042	1	150	tags=27%, list=12%, signal=30%
LSM1_SGA	43	-0.20218	-1.19213	0.237721	0.520707	1	674	tags=72%, list=54%, signal=150%
SFA1_SGA	17	-0.287741	-1.19159	0.238683	0.520687	1	156	tags=29%, list=12%, signal=33%
MMR1_SGA	21	-0.261351	-1.19157	0.266949	0.519768	1	652	tags=81%, list=52%, signal=165%
DID4_SGA	27	-0.237532	-1.18934	0.230315	0.522879	1	761	tags=85%, list=60%, signal=211%
CDC7-4_SGA	34	-0.221579	-1.18798	0.239171	0.524515	1	96	tags=18%, list=8%, signal=19%
BUD27_SGA	33	-0.219618	-1.18705	0.233129	0.525226	1	167	tags=24%, list=13%, signal=27%
RSM7_SGA	19	-0.275965	-1.18686	0.24187	0.524584	1	134	tags=26%, list=11%, signal=29%
VIP1_SGA	16	-0.296235	-1.18619	0.26195	0.524856	1	411	tags=56%, list=33%, signal=82%
MKS1_BIND	17	-0.284809	-1.18588	0.264529	0.524426	1	652	tags=82%, list=52%, signal=169%
PRM7_SGA	16	-0.290734	-1.18253	0.26	0.529616	1	551	tags=75%, list=44%, signal=132%
KEM1_BIND	41	-0.209491	-1.18064	0.25355	0.532193	1	167	tags=22%, list=13%, signal=24%
BRE5_SGA	51	-0.194684	-1.17961	0.252788	0.533227	1	321	tags=33%, list=25%, signal=43%
STU1-5_SGA	23	-0.251084	-1.17945	0.256972	0.532506	1	476	tags=57%, list=38%, signal=89%
NUP60_BIND	21	-0.26154	-1.17934	0.228346	0.531741	1	870	tags=95%, list=69%, signal=303%
SUT1_SGA	15	-0.302241	-1.1793	0.286299	0.530806	1	356	tags=53%, list=28%, signal=73%
SCS3_SGA	17	-0.279051	-1.17919	0.249531	0.530001	1	436	tags=53%, list=35%, signal=80%
GIM5_SGA	49	-0.199882	-1.1781	0.23622	0.531109	1	110	tags=18%, list=9%, signal=19%
RRP6_SGA	17	-0.284783	-1.17781	0.243513	0.530739	1	743	tags=88%, list=59%, signal=212%
SEC63-1_SGA	59	-0.187132	-1.17691	0.258252	0.5314	1	437	tags=46%, list=35%, signal=67%
YHC1-8_SGA	24	-0.250061	-1.17642	0.25731	0.531369	1	870	tags=96%, list=69%, signal=304%
SEC17-1_SGA	22	-0.255033	-1.17162	0.26145	0.539305	1	643	tags=77%, list=51%, signal=155%
RIBONUCLEOPROTEIN COMPLEX_CEL	62	-0.172247	-1.17127	0.234252	0.538998	1	601	tags=66%, list=48%, signal=120%
DGK1_SGA	47	-0.194592	-1.17045	0.23506	0.539601	1	103	tags=17%, list=8%, signal=18%
SWI4_SGA	31	-0.221791	-1.16967	0.277542	0.540108	1	201	tags=26%, list=16%, signal=30%
NUP133_BIND	24	-0.251923	-1.16843	0.27833	0.541594	1	870	tags=96%, list=69%, signal=304%
VAM6_SGA	29	-0.225523	-1.16392	0.287474	0.549237	1	773	tags=86%, list=61%, signal=218%
RUD3_SGA	27	-0.238095	-1.16323	0.272727	0.549619	1	408	tags=48%, list=32%, signal=70%
HST3_SGA	16	-0.278166	-1.16236	0.26938	0.550208	1	754	tags=88%, list=60%, signal=215%
RIM13_SGA	26	-0.2366	-1.16215	0.282609	0.549604	1	201	tags=27%, list=16%, signal=31%
SNF4_BIND	20	-0.25926	-1.16212	0.276392	0.548654	1	99	tags=20%, list=8%, signal=21%
MET30-9_SGA	21	-0.262224	-1.16206	0.266925	0.547796	1	455	tags=52%, list=36%, signal=81%
SFT2_SGA	18	-0.278262	-1.15996	0.279352	0.550642	1	480	tags=61%, list=38%, signal=97%
CIN1_SGA	15	-0.296243	-1.15904	0.28972	0.551386	1	66	tags=20%, list=5%, signal=21%
ELP3_SGA	16	-0.2866	-1.1589	0.257812	0.550639	1	99	tags=25%, list=8%, signal=27%
HAP2_SGA	15	-0.293992	-1.1588	0.279835	0.549801	1	199	tags=33%, list=16%, signal=39%
YRA1_BIND	24	-0.245458	-1.15777	0.280769	0.550704	1	145	tags=25%, list=12%, signal=28%
NOB1_DAMP_SGA	18	-0.26828	-1.15731	0.293878	0.550673	1	286	tags=39%, list=23%, signal=50%
RIM15_SGA	36	-0.209672	-1.15519	0.279843	0.553597	1	628	tags=69%, list=50%, signal=135%
SHS1_SGA	24	-0.242084	-1.15471	0.289773	0.553456	1	777	tags=88%, list=62%, signal=224%
RIM8_SGA	21	-0.258455	-1.15117	0.269841	0.559161	1	201	tags=33%, list=16%, signal=39%
SCS2_SGA	16	-0.281577	-1.15017	0.275862	0.560193	1	910	tags=100%, list=72%, signal=356%
TAF12_BIND	15	-0.29806	-1.14893	0.307692	0.561643	1	92	tags=27%, list=7%, signal=28%
RIM101_BIND	22	-0.249241	-1.1486	0.285149	0.561253	1	187	tags=27%, list=15%, signal=31%
VMA9_SGA	58	-0.175788	-1.1481	0.25	0.561171	1	590	tags=60%, list=47%, signal=108%
PHO23_BIND	32	-0.218706	-1.14751	0.284314	0.561425	1	408	tags=44%, list=32%, signal=63%
GCN1_BIND	26	-0.237132	-1.14387	0.293307	0.567635	1	652	tags=73%, list=52%, signal=148%
HMI1_SGA	24	-0.241274	-1.14364	0.286307	0.567059	1	411	tags=50%, list=33%, signal=73%
RIM9_SGA	22	-0.244899	-1.14338	0.288577	0.56656	1	379	tags=45%, list=30%, signal=64%
PMT5_P5-571_DN	25	-0.240509	-1.14325	0.283058	0.565783	1	124	tags=24%, list=10%, signal=26%
VPS8_SGA	41	-0.201837	-1.14323	0.29249	0.564821	1	310	tags=34%, list=25%, signal=44%
RPS27B_BIND	15	-0.289849	-1.13954	0.292434	0.571005	1	139	tags=27%, list=11%, signal=30%
ERG2_BIND	29	-0.223545	-1.13724	0.309917	0.574419	1	175	tags=28%, list=14%, signal=31%
EUG1_SGA	32	-0.217739	-1.13667	0.291165	0.574547	1	152	tags=22%, list=12%, signal=24%
ATP5_SGA	15	-0.291723	-1.13511	0.305503	0.576562	1	674	tags=80%, list=54%, signal=170%
SMI1_SGA	28	-0.227855	-1.13425	0.290188	0.57729	1	794	tags=89%, list=63%, signal=236%
DST1_BIND	23	-0.243609	-1.13319	0.306202	0.578384	1	758	tags=83%, list=60%, signal=204%
ERG6_BIND	22	-0.251102	-1.13306	0.307851	0.577637	1	278	tags=36%, list=22%, signal=46%
HEM2_DAMP_SGA	15	-0.282941	-1.13282	0.321569	0.577083	1	745	tags=87%, list=59%, signal=210%
RTS1_SGA	21	-0.250996	-1.13177	0.315399	0.578147	1	586	tags=71%, list=47%, signal=131%
GLE2_SGA	15	-0.288139	-1.13168	0.311284	0.577322	1	428	tags=53%, list=34%, signal=80%
DYN3_SGA	31	-0.220141	-1.13112	0.276923	0.57747	1	927	tags=97%, list=74%, signal=358%
ARL3_SGA	38	-0.204299	-1.13053	0.299213	0.577592	1	840	tags=89%, list=67%, signal=261%
SET2_SGA	16	-0.285988	-1.13052	0.331439	0.576633	1	198	tags=31%, list=16%, signal=37%
PMN PHAGOCYTOSIS_UP	49	-0.185476	-1.13039	0.29771	0.575952	1	276	tags=33%, list=22%, signal=40%
THG1_DAMP_SGA	25	-0.232481	-1.13039	0.300191	0.574982	1	229	tags=32%, list=18%, signal=38%
THP2_BIND	15	-0.289399	-1.12994	0.294872	0.57487	1	464	tags=60%, list=37%, signal=94%
YDJ1_BIND	28	-0.224456	-1.12947	0.314176	0.574787	1	745	tags=82%, list=59%, signal=197%
RPP2B_BIND	15	-0.287288	-1.12788	0.319608	0.576803	1	590	tags=73%, list=47%, signal=136%
SNF1_SGA	19	-0.25186	-1.12715	0.298343	0.577192	1	667	tags=79%, list=53%, signal=165%
SNF6-CHIP-37C	119	-0.144015	-1.12715	0.26501	0.576213	1	190	tags=22%, list=15%, signal=23%
CYTOSKELETAL PART_CEL	24	-0.240003	-1.12659	0.305155	0.576363	1	856	tags=92%, list=68%, signal=281%
NIP100_SGA	34	-0.209172	-1.12273	0.301158	0.583076	1	105	tags=18%, list=8%, signal=19%
NUP188_SGA	32	-0.215015	-1.12008	0.319361	0.587073	1	174	tags=25%, list=14%, signal=28%
LEA1_SGA	38	-0.208437	-1.11924	0.303605	0.587602	1	961	tags=97%, list=76%, signal=399%
RTG1_SGA	30	-0.22428	-1.1183	0.315476	0.588426	1	174	tags=27%, list=14%, signal=30%
MED8-51_SGA	27	-0.223316	-1.11613	0.333333	0.591852	1	500	tags=56%, list=40%, signal=90%
CATION TRANSPORTER ACTIVITY_MOL	15	-0.288718	-1.11517	0.323475	0.59282	1	613	tags=80%, list=49%, signal=154%
DDC1_SGA	19	-0.257915	-1.11433	0.312369	0.593483	1	464	tags=58%, list=37%, signal=90%
FAR11_SGA	15	-0.283888	-1.11417	0.324056	0.592785	1	739	tags=87%, list=59%, signal=207%
AFG3_SGA	19	-0.262691	-1.11322	0.320388	0.593664	1	156	tags=26%, list=12%, signal=30%
PGA3_DAMP_SGA	30	-0.219595	-1.11171	0.321293	0.595431	1	521	tags=57%, list=41%, signal=94%
VPS72_SGA	29	-0.220599	-1.11086	0.338086	0.596151	1	167	tags=24%, list=13%, signal=27%
LRP1_BIND	27	-0.228365	-1.11053	0.322772	0.595868	1	196	tags=30%, list=16%, signal=34%
ATS1_SGA	18	-0.260224	-1.10938	0.309615	0.597103	1	542	tags=67%, list=43%, signal=115%
CPR8_SGA	15	-0.28209	-1.10927	0.326772	0.596342	1	801	tags=93%, list=64%, signal=254%
CA21CHR4X2	24	-0.234136	-1.10877	0.325866	0.59624	1	275	tags=33%, list=22%, signal=42%
SEC28_SGA	42	-0.18973	-1.1086	0.320755	0.595545	1	384	tags=43%, list=31%, signal=60%
CTK1_BIND	17	-0.267335	-1.10765	0.317121	0.596469	1	487	tags=59%, list=39%, signal=95%
ACT1-120_SGA	22	-0.24649	-1.10402	0.324376	0.602497	1	436	tags=50%, list=35%, signal=75%
PRP22-1_SGA	43	-0.190605	-1.1037	0.330661	0.602107	1	773	tags=81%, list=61%, signal=204%
SRM1-TS_SGA	19	-0.252688	-1.10212	0.321932	0.604268	1	870	tags=95%, list=69%, signal=302%
VAM3_SGA	15	-0.28135	-1.10182	0.339216	0.603924	1	910	tags=100%, list=72%, signal=356%
PSK2_SGA	15	-0.28022	-1.09994	0.331461	0.606559	1	435	tags=60%, list=35%, signal=91%
LDB18_SGA	26	-0.226014	-1.09948	0.315399	0.606405	1	910	tags=96%, list=72%, signal=340%
TRANSCRIPTION FACTOR COMPLEX_CEL	18	-0.2624	-1.09555	0.369439	0.613094	1	463	tags=56%, list=37%, signal=87%
UBP14_SGA	30	-0.210794	-1.09548	0.328032	0.612245	1	751	tags=80%, list=60%, signal=194%
HYPHAE_SPIDER_DN	61	-0.168837	-1.0916	0.358674	0.6188	1	342	tags=38%, list=27%, signal=49%
VID28_SGA	22	-0.234758	-1.08961	0.366053	0.621722	1	674	tags=82%, list=54%, signal=173%
IPK1_SGA	29	-0.213043	-1.08781	0.356164	0.624231	1	716	tags=79%, list=57%, signal=180%
WHI2_SGA	34	-0.203316	-1.08689	0.331313	0.625015	1	801	tags=85%, list=64%, signal=228%
CDC50_SGA	18	-0.250975	-1.08374	0.370297	0.630277	1	865	tags=94%, list=69%, signal=297%
RPS28B_SGA	18	-0.258128	-1.08249	0.365269	0.631826	1	592	tags=72%, list=47%, signal=134%
RMD1_SGA	22	-0.235677	-1.0819	0.368421	0.631968	1	687	tags=82%, list=55%, signal=177%
SPC24-1_SGA	17	-0.25684	-1.08097	0.351711	0.632841	1	321	tags=41%, list=25%, signal=55%
SLX8_BIND	20	-0.245001	-1.08096	0.36692	0.631865	1	487	tags=60%, list=39%, signal=96%
PDR17_SGA	16	-0.262672	-1.07984	0.35249	0.633013	1	582	tags=69%, list=46%, signal=126%
SLT2_SGA	25	-0.2249	-1.07816	0.340637	0.635184	1	175	tags=28%, list=14%, signal=32%
AGE2_BIND	15	-0.271704	-1.07745	0.36	0.635661	1	922	tags=100%, list=73%, signal=369%
LST8-15_SGA	40	-0.18996	-1.07743	0.361277	0.63469	1	639	tags=70%, list=51%, signal=138%
WBP1-1_SGA	52	-0.179362	-1.07706	0.372781	0.634439	1	182	tags=23%, list=14%, signal=26%
VPS9_SGA	42	-0.186753	-1.07467	0.37605	0.638125	1	831	tags=86%, list=66%, signal=244%
GAL4_UP	59	-0.168217	-1.07465	0.354207	0.637161	1	312	tags=32%, list=25%, signal=41%
RPS21B_BIND	16	-0.266652	-1.0742	0.364173	0.636983	1	139	tags=25%, list=11%, signal=28%
DED1_BIND	17	-0.265013	-1.07364	0.374233	0.63714	1	599	tags=76%, list=48%, signal=144%
PAP2_SGA	48	-0.180404	-1.07354	0.373832	0.63632	1	452	tags=48%, list=36%, signal=72%
DAL81_SGA	18	-0.250389	-1.07345	0.35098	0.635466	1	789	tags=89%, list=63%, signal=235%
PHO88_BIND	23	-0.238667	-1.07307	0.356713	0.635221	1	473	tags=57%, list=38%, signal=89%
VAM7_SGA	28	-0.216388	-1.07303	0.364919	0.634317	1	784	tags=86%, list=62%, signal=222%
RRM3_SGA	19	-0.243691	-1.07266	0.364706	0.63409	1	749	tags=84%, list=59%, signal=205%
LGE1_BIND	27	-0.217847	-1.07175	0.372401	0.634972	1	940	tags=96%, list=75%, signal=372%
MVP1_SGA	15	-0.274193	-1.07092	0.399614	0.635638	1	589	tags=73%, list=47%, signal=136%
RPP2B_SGA	17	-0.258737	-1.06862	0.363095	0.639254	1	456	tags=53%, list=36%, signal=82%
APS1_SGA	28	-0.214552	-1.0652	0.367188	0.645058	1	604	tags=68%, list=48%, signal=128%
RAP1_DAMP_SGA	59	-0.169124	-1.06488	0.366803	0.644709	1	456	tags=47%, list=36%, signal=71%
GYP1_BIND	25	-0.226326	-1.06434	0.3706	0.644817	1	782	tags=88%, list=62%, signal=228%
GET1_SGA	46	-0.184198	-1.06229	0.396414	0.647799	1	527	tags=57%, list=42%, signal=94%
ACT1-136_SGA	26	-0.217579	-1.06165	0.385859	0.647975	1	174	tags=23%, list=14%, signal=26%
KETOCONAZOLE_UP	35	-0.197414	-1.0587	0.395582	0.652606	1	259	tags=34%, list=21%, signal=42%
LAS21_SGA	30	-0.208293	-1.05766	0.371429	0.6536	1	201	tags=27%, list=16%, signal=31%
SIW14_BIND	15	-0.272094	-1.05563	0.39726	0.656604	1	21	tags=13%, list=2%, signal=13%
CDC28-13_SGA	16	-0.259051	-1.05385	0.376016	0.659207	1	938	tags=100%, list=75%, signal=387%
TGS1_BIND	15	-0.268351	-1.05363	0.409615	0.65859	1	105	tags=20%, list=8%, signal=22%
DYS1_DAMP_SGA	23	-0.230741	-1.0527	0.373814	0.659346	1	150	tags=26%, list=12%, signal=29%
TOR2-29_SGA	16	-0.258521	-1.04993	0.404715	0.663685	1	97	tags=19%, list=8%, signal=20%
UME6_SGA	20	-0.241324	-1.04315	0.403442	0.676031	1	961	tags=100%, list=76%, signal=416%
SHP1_SGA	39	-0.185876	-1.0431	0.393701	0.675097	1	531	tags=56%, list=42%, signal=95%
PAU4_SGA	17	-0.252917	-1.04283	0.394942	0.674634	1	415	tags=53%, list=33%, signal=78%
TIF5_DAMP_SGA	17	-0.247132	-1.04044	0.403131	0.678367	1	610	tags=71%, list=48%, signal=135%
PTR3_DAMP_SGA	16	-0.259149	-1.04025	0.389433	0.677759	1	327	tags=44%, list=26%, signal=58%
CDC2-2_SGA	16	-0.254899	-1.03972	0.382643	0.677798	1	748	tags=88%, list=59%, signal=213%
VPS27_BIND	25	-0.219865	-1.03932	0.402	0.677616	1	174	tags=24%, list=14%, signal=27%
APE2_SGA	19	-0.241336	-1.03862	0.400778	0.677933	1	749	tags=84%, list=59%, signal=205%
RAD6_BIND	18	-0.245378	-1.03758	0.420842	0.678977	1	870	tags=94%, list=69%, signal=301%
BRE2_SGA	21	-0.236559	-1.03721	0.422449	0.678689	1	408	tags=52%, list=32%, signal=76%
BUB1_BIND	22	-0.226013	-1.03594	0.400771	0.680305	1	408	tags=50%, list=32%, signal=73%
PMA1_DAMP_SGA	30	-0.201159	-1.03437	0.423529	0.682326	1	167	tags=23%, list=13%, signal=26%
RAD27_SGA	21	-0.229066	-1.03409	0.402367	0.681894	1	910	tags=95%, list=72%, signal=338%
CIN8_BIND	17	-0.246998	-1.03351	0.405622	0.682049	1	167	tags=29%, list=13%, signal=33%
GDH2_SGA	16	-0.25342	-1.03301	0.39	0.682081	1	687	tags=81%, list=55%, signal=177%
EAF5_SGA	24	-0.217871	-1.03259	0.418033	0.681913	1	76	tags=17%, list=6%, signal=17%
ATPASE ACTIVITY_MOL	30	-0.200117	-1.03251	0.406427	0.681054	1	102	tags=13%, list=8%, signal=14%
WBP1-2_SGA	33	-0.196264	-1.03213	0.413174	0.680859	1	175	tags=24%, list=14%, signal=27%
SNT1_SGA	40	-0.184175	-1.02996	0.413462	0.684047	1	362	tags=40%, list=29%, signal=54%
VAM7_BIND	23	-0.220238	-1.02903	0.42449	0.684921	1	250	tags=30%, list=20%, signal=37%
VPS1_BIND	24	-0.220942	-1.0285	0.446328	0.68501	1	184	tags=21%, list=15%, signal=24%
APC5-CA_SGA	20	-0.235365	-1.02848	0.41	0.684033	1	576	tags=65%, list=46%, signal=118%
ERG6_SGA	26	-0.211932	-1.02825	0.427435	0.683453	1	938	tags=96%, list=75%, signal=369%
LEO1_BIND	24	-0.222761	-1.02809	0.43738	0.682767	1	463	tags=46%, list=37%, signal=71%
CA21CHR3X1	18	-0.239409	-1.02783	0.401198	0.682227	1	68	tags=17%, list=5%, signal=17%
CMD1-8_SGA	18	-0.245316	-1.02734	0.421712	0.682138	1	521	tags=61%, list=41%, signal=103%
UPS1_SGA	46	-0.174581	-1.027	0.416996	0.681809	1	514	tags=54%, list=41%, signal=88%
RRF1_SGA	19	-0.232559	-1.02667	0.424942	0.68138	1	385	tags=47%, list=31%, signal=67%
ALG8_SGA	15	-0.267716	-1.02592	0.423459	0.681889	1	201	tags=33%, list=16%, signal=39%
SWC3_SGA	28	-0.213142	-1.0251	0.410901	0.682444	1	487	tags=54%, list=39%, signal=85%
ARL1_SGA	18	-0.245964	-1.02448	0.440239	0.68267	1	754	tags=83%, list=60%, signal=205%
SHP1_BIND	16	-0.252182	-1.02349	0.415479	0.683606	1	184	tags=31%, list=15%, signal=36%
ELP2_SGA	25	-0.210958	-1.023	0.4	0.683556	1	110	tags=20%, list=9%, signal=21%
NUP57-E17_SGA	24	-0.220409	-1.02193	0.427146	0.684611	1	206	tags=29%, list=16%, signal=34%
DOT1_BIND	16	-0.248058	-1.02191	0.434043	0.683657	1	242	tags=31%, list=19%, signal=38%
ERG11-TD_SGA	15	-0.254922	-1.02155	0.421569	0.683352	1	298	tags=40%, list=24%, signal=52%
ELP6_BIND	23	-0.223472	-1.02001	0.419287	0.68537	1	660	tags=74%, list=52%, signal=153%
NOP1_BIND	18	-0.239057	-1.01799	0.406551	0.688509	1	599	tags=72%, list=48%, signal=136%
CDC5_4H_DN	26	-0.212019	-1.01626	0.429134	0.691009	1	140	tags=15%, list=11%, signal=17%
SDS22-5_SGA	17	-0.248278	-1.01541	0.417457	0.691663	1	408	tags=53%, list=32%, signal=77%
SRP101_DAMP_SGA	52	-0.162475	-1.01486	0.405882	0.691769	1	761	tags=79%, list=60%, signal=191%
PRP21-TS_SGA	23	-0.217629	-1.0145	0.431818	0.691439	1	404	tags=48%, list=32%, signal=69%
BNI1_SGA	16	-0.249183	-1.01424	0.472279	0.690922	1	142	tags=25%, list=11%, signal=28%
EAF3_SGA	17	-0.241705	-1.01384	0.43203	0.690743	1	518	tags=59%, list=41%, signal=99%
UBA4_SGA	15	-0.256363	-1.0135	0.436	0.69043	1	609	tags=73%, list=48%, signal=140%
UPC2_UP	57	-0.1622	-1.01102	0.435361	0.694443	1	259	tags=30%, list=21%, signal=36%
RIM20_SGA	21	-0.2204	-1.00919	0.447732	0.696918	1	480	tags=57%, list=38%, signal=91%
TOP1_SGA	17	-0.247007	-1.00774	0.417012	0.698911	1	107	tags=24%, list=8%, signal=25%
GAB1-1_SGA	24	-0.212871	-1.00685	0.441584	0.699659	1	179	tags=25%, list=14%, signal=29%
SEC9-4_SGA	19	-0.232271	-1.00503	0.419417	0.702348	1	39	tags=16%, list=3%, signal=16%
VAC14_BIND	25	-0.210697	-1.00345	0.446894	0.704531	1	1000	tags=100%, list=79%, signal=476%
CIN8_SGA	18	-0.236437	-1.00143	0.443359	0.707528	1	54	tags=17%, list=4%, signal=17%
ARD1_SGA	23	-0.214272	-1.00129	0.426	0.706823	1	312	tags=35%, list=25%, signal=45%
RUD3_BIND	30	-0.198544	-1.00085	0.465779	0.706713	1	408	tags=43%, list=32%, signal=63%
ARO1_SGA	27	-0.200901	-1.00019	0.440476	0.706956	1	467	tags=48%, list=37%, signal=75%
EAF1_BIND	21	-0.222103	-1.00001	0.459302	0.706303	1	92	tags=19%, list=7%, signal=20%
SDS3_BIND	31	-0.192231	-0.999572	0.460744	0.706222	1	73	tags=16%, list=6%, signal=17%
BIM1_SGA	43	-0.1714	-0.998978	0.459245	0.706405	1	550	tags=56%, list=44%, signal=96%
RTG2_SGA	32	-0.190905	-0.99892	0.457732	0.705528	1	639	tags=72%, list=51%, signal=142%
SAC3_SGA	16	-0.240191	-0.998316	0.43301	0.705689	1	435	tags=50%, list=35%, signal=75%
ADH3_SGA	19	-0.235482	-0.99775	0.489443	0.705852	1	617	tags=74%, list=49%, signal=142%
NOG1_BIND	15	-0.260128	-0.996922	0.453763	0.706391	1	508	tags=67%, list=40%, signal=110%
RML2_SGA	65	-0.153536	-0.996208	0.460967	0.706803	1	501	tags=48%, list=40%, signal=75%
SLU7-TS1_SGA	20	-0.22657	-0.995969	0.451172	0.706276	1	142	tags=20%, list=11%, signal=22%
AKR1_SGA	23	-0.216442	-0.991734	0.466667	0.713452	1	545	tags=61%, list=43%, signal=105%
BEM2_SGA	33	-0.188402	-0.99139	0.481038	0.713149	1	411	tags=45%, list=33%, signal=66%
SEC27-1_SGA	24	-0.21398	-0.990387	0.495763	0.714174	1	929	tags=96%, list=74%, signal=359%
CDC73_SGA	22	-0.21835	-0.989723	0.468809	0.714479	1	467	tags=50%, list=37%, signal=78%
TAF5-15_SGA	21	-0.221819	-0.986121	0.463415	0.720669	1	776	tags=86%, list=62%, signal=220%
HIR3_BIND	18	-0.235022	-0.984453	0.470135	0.722938	1	174	tags=28%, list=14%, signal=32%
VID22_BIND	15	-0.25261	-0.983397	0.503802	0.724066	1	523	tags=60%, list=42%, signal=101%
TRS31_DAMP_SGA	17	-0.235394	-0.981248	0.463221	0.727237	1	780	tags=88%, list=62%, signal=229%
RPT4-150_SGA	21	-0.216975	-0.978146	0.476636	0.732293	1	435	tags=48%, list=35%, signal=72%
GUP1_BIND	22	-0.21328	-0.977841	0.469667	0.731888	1	223	tags=32%, list=18%, signal=38%
SPF1_SGA	24	-0.203234	-0.977675	0.473581	0.731225	1	245	tags=29%, list=19%, signal=36%
SNT309_SGA	29	-0.19344	-0.976944	0.508032	0.73171	1	870	tags=90%, list=69%, signal=283%
LIGASE ACTIVITY_MOL	18	-0.228626	-0.976762	0.51068	0.73104	1	676	tags=78%, list=54%, signal=166%
CDC5_4H_UP	50	-0.16166	-0.974838	0.475096	0.733913	1	360	tags=38%, list=29%, signal=51%
YAF9_BIND	20	-0.222118	-0.972739	0.489524	0.736982	1	184	tags=25%, list=15%, signal=29%
NHP10_BIND	22	-0.21237	-0.971705	0.477273	0.738019	1	205	tags=27%, list=16%, signal=32%
VPS3_SGA	17	-0.237536	-0.970979	0.462777	0.738512	1	514	tags=59%, list=41%, signal=98%
SEC11-2_SGA	21	-0.212942	-0.970917	0.481336	0.737647	1	480	tags=52%, list=38%, signal=83%
UBP6_SGA	30	-0.197325	-0.969651	0.491632	0.739219	1	663	tags=73%, list=53%, signal=151%
UBC7_SGA	19	-0.220512	-0.964388	0.479839	0.748691	1	436	tags=47%, list=35%, signal=71%
RGP1_SGA	39	-0.169114	-0.961935	0.513834	0.752546	1	961	tags=95%, list=76%, signal=388%
RNA15-58_SGA	28	-0.192484	-0.961203	0.499022	0.753041	1	675	tags=75%, list=54%, signal=158%
USE1-TS_SGA	15	-0.24428	-0.96101	0.480519	0.75238	1	167	tags=27%, list=13%, signal=30%
NRD1_DAMP_SGA	22	-0.209715	-0.96091	0.484252	0.75157	1	179	tags=27%, list=14%, signal=31%
ENT5_SGA	20	-0.212807	-0.95896	0.495935	0.754401	1	545	tags=60%, list=43%, signal=104%
MGR3_SGA	20	-0.213851	-0.958412	0.472727	0.754465	1	182	tags=25%, list=14%, signal=29%
HSP60_DAMP_SGA	20	-0.215246	-0.958293	0.541667	0.753677	1	674	tags=75%, list=54%, signal=159%
GRE3_SGA	30	-0.183397	-0.957442	0.504132	0.754292	1	938	tags=93%, list=75%, signal=357%
MSC1_SGA	67	-0.14375	-0.956484	0.500942	0.7552	1	495	tags=46%, list=39%, signal=72%
RPL8B_BIND	25	-0.202701	-0.956155	0.515564	0.75481	1	601	tags=68%, list=48%, signal=128%
YJR054W_BIND	19	-0.226343	-0.955862	0.504082	0.75435	1	280	tags=37%, list=22%, signal=47%
CKB1_SGA	24	-0.200958	-0.955829	0.525912	0.753405	1	436	tags=46%, list=35%, signal=69%
RTF1_SGA	42	-0.167689	-0.953843	0.505219	0.756299	1	134	tags=17%, list=11%, signal=18%
AIM44_BIND	19	-0.22054	-0.949647	0.549696	0.763563	1	909	tags=95%, list=72%, signal=336%
IST3_SGA	25	-0.197194	-0.948717	0.530888	0.764326	1	600	tags=64%, list=48%, signal=120%
MOG1_BIND	19	-0.21717	-0.948523	0.512605	0.763709	1	689	tags=79%, list=55%, signal=172%
LSM1_BIND	41	-0.166052	-0.948457	0.514735	0.762834	1	1021	tags=98%, list=81%, signal=499%
BRE5_BIND	41	-0.164348	-0.948325	0.532544	0.762067	1	109	tags=15%, list=9%, signal=15%
NOP12_BIND	20	-0.211658	-0.948182	0.505703	0.761342	1	109	tags=20%, list=9%, signal=22%
T4 ACETIC-VS-CONTROL_DN	370	-0.0980264	-0.9446	0.599609	0.767242	1	429	tags=36%, list=34%, signal=38%
RAD23_SGA	19	-0.217074	-0.94451	0.492157	0.766411	1	794	tags=84%, list=63%, signal=225%
SPE1_SGA	27	-0.190702	-0.944196	0.516378	0.766004	1	687	tags=74%, list=55%, signal=160%
MDM10_SGA	45	-0.16007	-0.94384	0.543651	0.765629	1	840	tags=84%, list=67%, signal=245%
GSF2_BIND	15	-0.242821	-0.941641	0.50625	0.768863	1	859	tags=93%, list=68%, signal=290%
RTT103_BIND	23	-0.20639	-0.940068	0.523327	0.771039	1	99	tags=17%, list=8%, signal=19%
MDM12_BIND	22	-0.210886	-0.9394	0.525194	0.771232	1	92	tags=18%, list=7%, signal=19%
RIM8_BIND	19	-0.216797	-0.939047	0.504149	0.77095	1	184	tags=26%, list=15%, signal=30%
CHO2_BIND	31	-0.182143	-0.938492	0.540816	0.770942	1	687	tags=74%, list=55%, signal=159%
YKE2_SGA	34	-0.178818	-0.93819	0.551257	0.770511	1	554	tags=56%, list=44%, signal=97%
YPT6_BIND	41	-0.16847	-0.938053	0.519608	0.76976	1	870	tags=88%, list=69%, signal=275%
ARP1_SGA	17	-0.221568	-0.937926	0.541247	0.769022	1	495	tags=53%, list=39%, signal=86%
ORM2_SGA	33	-0.176183	-0.937486	0.538307	0.768894	1	1044	tags=100%, list=83%, signal=570%
OSM1_SGA	16	-0.229993	-0.93603	0.535294	0.770632	1	576	tags=69%, list=46%, signal=125%
CA21CHR1X1	25	-0.196379	-0.935729	0.520154	0.770285	1	501	tags=56%, list=40%, signal=91%
PDA1_SGA	15	-0.238562	-0.935515	0.536489	0.769722	1	25	tags=13%, list=2%, signal=13%
SAM37_BIND	17	-0.228975	-0.933364	0.558468	0.772925	1	116	tags=24%, list=9%, signal=26%
GIM3_BIND	28	-0.187957	-0.93178	0.532934	0.774906	1	105	tags=18%, list=8%, signal=19%
SOH1_BIND	25	-0.193792	-0.931059	0.535156	0.775301	1	184	tags=24%, list=15%, signal=28%
HHT1_BIND	29	-0.179014	-0.930848	0.533605	0.774673	1	463	tags=48%, list=37%, signal=75%
HDA3_SGA	24	-0.201888	-0.929702	0.537832	0.775869	1	436	tags=46%, list=35%, signal=69%
CDC4-3_SGA	19	-0.212828	-0.929297	0.555556	0.775652	1	909	tags=95%, list=72%, signal=336%
RPS24A_BIND	19	-0.21575	-0.92915	0.546845	0.774904	1	652	tags=74%, list=52%, signal=151%
SET2_BIND	24	-0.201687	-0.928532	0.528541	0.775021	1	408	tags=46%, list=32%, signal=67%
T1 BUTYRIC-VS-CONTROL_DN	55	-0.147805	-0.928505	0.572254	0.774072	1	419	tags=44%, list=33%, signal=63%
BTS1_BIND	30	-0.186529	-0.92848	0.560606	0.773125	1	780	tags=83%, list=62%, signal=214%
AVL9_SGA	19	-0.216629	-0.927439	0.550813	0.774069	1	910	tags=95%, list=72%, signal=337%
HYPHAE_DN	60	-0.144184	-0.925741	0.565891	0.776262	1	203	tags=22%, list=16%, signal=25%
SSD1_SGA	55	-0.146243	-0.92369	0.568359	0.779198	1	182	tags=20%, list=14%, signal=22%
EMI1_BIND	15	-0.231671	-0.922581	0.535156	0.780458	1	167	tags=27%, list=13%, signal=30%
APM3_SGA	20	-0.208181	-0.922069	0.540797	0.780396	1	514	tags=60%, list=41%, signal=100%
EDE1_SGA	16	-0.226877	-0.920798	0.544148	0.781777	1	153	tags=25%, list=12%, signal=28%
GET2_BIND	68	-0.136995	-0.91747	0.575	0.787142	1	803	tags=79%, list=64%, signal=207%
SNO4_SGA	23	-0.197464	-0.91689	0.55684	0.787197	1	394	tags=43%, list=31%, signal=62%
ARF1_BIND	28	-0.189213	-0.914763	0.576923	0.790131	1	910	tags=93%, list=72%, signal=328%
BUD21_BIND	17	-0.220045	-0.913368	0.572314	0.791753	1	452	tags=59%, list=36%, signal=91%
BEM2_BIND	20	-0.20904	-0.91164	0.562257	0.794086	1	1001	tags=100%, list=80%, signal=480%
GYP8_SGA	20	-0.207067	-0.911076	0.566462	0.794135	1	929	tags=95%, list=74%, signal=357%
CPR7_BIND	15	-0.233011	-0.909506	0.578	0.796111	1	871	tags=93%, list=69%, signal=299%
MGR2_SGA	25	-0.193109	-0.908651	0.571429	0.796623	1	758	tags=84%, list=60%, signal=207%
YAR1_SGA	16	-0.221861	-0.905659	0.555985	0.801161	1	105	tags=19%, list=8%, signal=20%
ECM2_SGA	16	-0.226453	-0.904498	0.573122	0.802329	1	406	tags=50%, list=32%, signal=73%
MED1_BIND	32	-0.171352	-0.901732	0.574713	0.806284	1	718	tags=75%, list=57%, signal=170%
HYDROLASE ACTIVITY, ACTING ON ACID ANHYDRIDES_MOL	42	-0.154918	-0.900747	0.59387	0.807112	1	107	tags=12%, list=8%, signal=13%
FAR3_SGA	25	-0.183601	-0.900359	0.585462	0.80685	1	643	tags=68%, list=51%, signal=136%
PYROPHOSPHATASE ACTIVITY_MOL	42	-0.154918	-0.897136	0.589286	0.811936	1	107	tags=12%, list=8%, signal=13%
CDC37-TS_SGA	30	-0.17657	-0.895837	0.58502	0.813344	1	374	tags=40%, list=30%, signal=56%
COG7_SGA	33	-0.169194	-0.895362	0.586	0.813211	1	927	tags=94%, list=74%, signal=347%
DYN1_SGA	18	-0.211837	-0.894083	0.56341	0.814547	1	727	tags=83%, list=58%, signal=194%
ELM1_SGA	20	-0.207095	-0.894077	0.590535	0.813548	1	201	tags=25%, list=16%, signal=29%
CELLULAR LIPID METABOLIC PROCESS_BIO	28	-0.180636	-0.891931	0.588933	0.816525	1	195	tags=25%, list=15%, signal=29%
VPS24_BIND	18	-0.213434	-0.891286	0.593688	0.81675	1	94	tags=17%, list=7%, signal=18%
CA21CHR6X2	28	-0.179211	-0.889644	0.609705	0.8188	1	539	tags=57%, list=43%, signal=98%
CA21CHRRX9	39	-0.158013	-0.88868	0.600402	0.819438	1	468	tags=49%, list=37%, signal=75%
PHOSPHORIC MONOESTER HYDROLASE ACTIVITY_MOL	15	-0.225887	-0.888525	0.588353	0.818703	1	475	tags=60%, list=38%, signal=95%
DED81_DAMP_SGA	17	-0.219337	-0.8882	0.584615	0.818333	1	545	tags=65%, list=43%, signal=113%
SIC1_SGA	17	-0.220178	-0.888045	0.598131	0.817613	1	803	tags=88%, list=64%, signal=240%
TPM1_BIND	17	-0.214033	-0.887615	0.588461	0.817427	1	174	tags=24%, list=14%, signal=27%
UBP6_BIND	28	-0.178565	-0.887591	0.605469	0.816492	1	487	tags=50%, list=39%, signal=80%
MNE1_SGA	16	-0.222863	-0.885685	0.597137	0.818932	1	167	tags=25%, list=13%, signal=28%
M PHASE_BIO	25	-0.184794	-0.885532	0.608519	0.818173	1	54	tags=8%, list=4%, signal=8%
RHE30_DN	62	-0.140418	-0.885489	0.667335	0.817274	1	456	tags=44%, list=36%, signal=65%
CYC2_SGA	15	-0.223828	-0.885469	0.607692	0.816314	1	436	tags=47%, list=35%, signal=71%
RHO4_SGA	18	-0.204693	-0.885411	0.579918	0.815403	1	428	tags=50%, list=34%, signal=75%
T4 PROPIONIC-VS-CONTROL_DN	340	-0.093319	-0.884526	0.707031	0.816027	1	360	tags=30%, list=29%, signal=31%
VAC14_SGA	30	-0.177437	-0.884368	0.60501	0.815316	1	856	tags=87%, list=68%, signal=264%
BRE1_BIND	28	-0.173443	-0.88422	0.600798	0.814574	1	72	tags=14%, list=6%, signal=15%
MCK1_SGA	20	-0.199354	-0.883371	0.588346	0.815061	1	1013	tags=100%, list=80%, signal=504%
IKI3_SGA	17	-0.212895	-0.883363	0.629098	0.81409	1	140	tags=24%, list=11%, signal=26%
ARC18_SGA	19	-0.20064	-0.882881	0.611632	0.813928	1	332	tags=37%, list=26%, signal=49%
DAM1-9_SGA	15	-0.222512	-0.882519	0.617234	0.813648	1	99	tags=20%, list=8%, signal=21%
PHOSPHORIC ESTER HYDROLASE ACTIVITY_MOL	17	-0.214158	-0.8819	0.593688	0.813649	1	475	tags=59%, list=38%, signal=93%
CYR1_HYPHAE_DN	69	-0.131813	-0.881794	0.645914	0.812876	1	162	tags=17%, list=13%, signal=19%
HYDROLASE ACTIVITY, ACTING ON ACID ANHYDRIDES, IN PHOSPHORUS-CONTAINING ANHYDRIDES_MOL	42	-0.154918	-0.880412	0.590551	0.814392	1	107	tags=12%, list=8%, signal=13%
SNF6-DOWN-37C	111	-0.114753	-0.878284	0.651116	0.817345	1	384	tags=34%, list=31%, signal=45%
PMP3_SGA	36	-0.159245	-0.878116	0.651575	0.816653	1	650	tags=67%, list=52%, signal=134%
RHB1_SGA	28	-0.173628	-0.876337	0.630522	0.81891	1	823	tags=86%, list=65%, signal=242%
YME1_BIND	17	-0.212365	-0.875629	0.604082	0.819156	1	30	tags=12%, list=2%, signal=12%
ENO2_SGA	24	-0.181048	-0.875351	0.604206	0.818727	1	134	tags=17%, list=11%, signal=18%
ILV3_DAMP_SGA	27	-0.182572	-0.874919	0.614367	0.818521	1	636	tags=67%, list=51%, signal=132%
MMS22_BIND	17	-0.215819	-0.874443	0.65	0.818343	1	167	tags=24%, list=13%, signal=27%
UBR2_SGA	27	-0.177437	-0.872038	0.616105	0.821626	1	174	tags=22%, list=14%, signal=25%
RAS2_SGA	18	-0.206301	-0.871874	0.601643	0.820963	1	153	tags=22%, list=12%, signal=25%
PKR1_BIND	26	-0.178892	-0.871822	0.635294	0.820071	1	139	tags=19%, list=11%, signal=21%
SAP30_BIND	26	-0.177982	-0.871376	0.613767	0.819886	1	487	tags=50%, list=39%, signal=80%
RTT101_BIND	16	-0.211591	-0.870887	0.645594	0.819845	1	228	tags=31%, list=18%, signal=38%
SWI4_BIND	32	-0.168976	-0.870822	0.61753	0.818993	1	864	tags=88%, list=69%, signal=272%
ASK10_BIND	20	-0.197051	-0.868251	0.620278	0.822733	1	87	tags=15%, list=7%, signal=16%
YPL150W_SGA	17	-0.20929	-0.867703	0.619802	0.822729	1	286	tags=35%, list=23%, signal=45%
KAR3_SGA	21	-0.198752	-0.865162	0.647602	0.826304	1	927	tags=95%, list=74%, signal=355%
DEG1_BIND	26	-0.176705	-0.864887	0.612967	0.8258	1	865	tags=88%, list=69%, signal=277%
CSE2_BIND	38	-0.162632	-0.863892	0.646484	0.82657	1	870	tags=87%, list=69%, signal=273%
RPL8A_BIND	23	-0.188729	-0.863608	0.641851	0.826077	1	174	tags=22%, list=14%, signal=25%
MEMBRANE ORGANIZATION AND BIOGENESIS_BIO	16	-0.210573	-0.863185	0.64881	0.825807	1	770	tags=88%, list=61%, signal=222%
ZCF21-BOUND-PEREZ	46	-0.147645	-0.862429	0.645161	0.826189	1	279	tags=30%, list=22%, signal=38%
RTF1_BIND	20	-0.196375	-0.862344	0.628906	0.825373	1	57	tags=15%, list=5%, signal=15%
COX7_SGA	17	-0.210024	-0.861571	0.604289	0.825752	1	20	tags=12%, list=2%, signal=12%
DNA METABOLIC PROCESS_BIO	60	-0.13281	-0.861468	0.664659	0.824989	1	86	tags=8%, list=7%, signal=9%
RET2-1_SGA	17	-0.208535	-0.860771	0.62423	0.825211	1	1001	tags=100%, list=80%, signal=481%
LEO1_SGA	17	-0.210016	-0.860016	0.615534	0.825567	1	909	tags=94%, list=72%, signal=334%
NBP2_SGA	32	-0.164864	-0.86	0.638171	0.824623	1	110	tags=16%, list=9%, signal=17%
SWI6_BIND	43	-0.14802	-0.857431	0.645161	0.828196	1	184	tags=21%, list=15%, signal=24%
SSF1_SGA	18	-0.204891	-0.857395	0.593626	0.827308	1	174	tags=22%, list=14%, signal=25%
MPE1_DAMP_SGA	16	-0.213736	-0.855169	0.630314	0.830249	1	628	tags=69%, list=50%, signal=135%
CA21CHR6X4	20	-0.193825	-0.854458	0.660714	0.83053	1	227	tags=30%, list=18%, signal=36%
CIK1_BIND	34	-0.163265	-0.85426	0.64375	0.829943	1	1060	tags=100%, list=84%, signal=616%
RLF2_SGA	16	-0.213483	-0.853822	0.642045	0.829713	1	206	tags=25%, list=16%, signal=30%
AME1-4_SGA	16	-0.215048	-0.852046	0.630058	0.831944	1	39	tags=13%, list=3%, signal=13%
DGK1_BIND	17	-0.204793	-0.850198	0.625506	0.83412	1	167	tags=24%, list=13%, signal=27%
UBP1_SGA	24	-0.182543	-0.847419	0.659091	0.838058	1	286	tags=33%, list=23%, signal=42%
SNT1_BIND	23	-0.183717	-0.846993	0.658824	0.837834	1	463	tags=48%, list=37%, signal=74%
NUP120_SGA	20	-0.194285	-0.844791	0.664717	0.840605	1	624	tags=70%, list=50%, signal=137%
IRA2_BIND	24	-0.178229	-0.844538	0.649351	0.840037	1	779	tags=83%, list=62%, signal=214%
CDC2-7_SGA	33	-0.158285	-0.844334	0.677734	0.839421	1	487	tags=48%, list=39%, signal=77%
CARBOHYDRATE METABOLIC PROCESS_BIO	31	-0.16247	-0.843953	0.658252	0.839145	1	397	tags=42%, list=32%, signal=60%
PTC1_BIND	35	-0.154614	-0.843461	0.670635	0.839016	1	478	tags=46%, list=38%, signal=72%
PCI8_SGA	15	-0.213556	-0.84308	0.653101	0.838714	1	236	tags=33%, list=19%, signal=41%
HXT2_SGA	19	-0.193438	-0.842514	0.654971	0.838713	1	928	tags=95%, list=74%, signal=355%
CA21CHR2X4	28	-0.165068	-0.841939	0.649899	0.838773	1	183	tags=21%, list=15%, signal=25%
RPO21_BIND	22	-0.183482	-0.840827	0.669847	0.839711	1	758	tags=82%, list=60%, signal=202%
NRG1_TF	29	-0.165544	-0.838027	0.668675	0.843443	1	295	tags=34%, list=23%, signal=44%
SEC22-3_SGA	36	-0.155307	-0.837874	0.686627	0.842734	1	124	tags=17%, list=10%, signal=18%
HAS1_BIND	17	-0.206613	-0.835437	0.646817	0.845895	1	542	tags=65%, list=43%, signal=112%
CDC12-1_SGA	15	-0.211829	-0.834391	0.641584	0.846648	1	152	tags=20%, list=12%, signal=22%
CA21CHRRX10	28	-0.168156	-0.83417	0.673228	0.846053	1	1053	tags=100%, list=84%, signal=598%
YKE2_BIND	36	-0.153416	-0.833497	0.693916	0.846174	1	187	tags=19%, list=15%, signal=22%
PPT2_SGA	30	-0.165155	-0.832578	0.675573	0.8467	1	667	tags=73%, list=53%, signal=152%
CA21CHRRX3	25	-0.175038	-0.831792	0.686508	0.84714	1	133	tags=20%, list=11%, signal=22%
YOR246C_SGA	22	-0.184551	-0.830969	0.656863	0.84763	1	436	tags=45%, list=35%, signal=68%
USO1-1_SGA	19	-0.190311	-0.830554	0.649402	0.847402	1	21	tags=11%, list=2%, signal=11%
CKB1_BIND	22	-0.182984	-0.830498	0.664032	0.84652	1	174	tags=23%, list=14%, signal=26%
SIF2_BIND	16	-0.207928	-0.825736	0.674699	0.853438	1	788	tags=88%, list=63%, signal=231%
LRS4_SGA	53	-0.134028	-0.824387	0.693548	0.854707	1	521	tags=51%, list=41%, signal=83%
REGULATION OF TRANSCRIPTION, DNA-DEPENDENT_BIO	52	-0.13377	-0.823907	0.71371	0.854502	1	495	tags=48%, list=39%, signal=76%
NEO1-2_SGA	31	-0.157092	-0.823664	0.716763	0.853929	1	608	tags=65%, list=48%, signal=122%
CHK1_BIND	16	-0.203786	-0.821161	0.679359	0.857112	1	29	tags=13%, list=2%, signal=13%
CSG2_BIND	15	-0.20741	-0.819642	0.666667	0.858646	1	126	tags=20%, list=10%, signal=22%
WOR1_TF	37	-0.148726	-0.819065	0.718631	0.858553	1	282	tags=30%, list=22%, signal=37%
REGULATION OF TRANSCRIPTION_BIO	52	-0.13377	-0.818122	0.712851	0.859215	1	495	tags=48%, list=39%, signal=76%
RIM1_BIND	15	-0.208311	-0.817173	0.679537	0.859841	1	167	tags=27%, list=13%, signal=30%
IME1P_TFMOTIF	85	-0.114996	-0.816644	0.726899	0.85977	1	236	tags=24%, list=19%, signal=27%
GCN1_SGA	20	-0.18504	-0.816642	0.707495	0.858818	1	21	tags=10%, list=2%, signal=10%
NUT1_BIND	20	-0.182524	-0.81567	0.686117	0.859478	1	198	tags=25%, list=16%, signal=29%
T4 BUTYRIC-VS-CONTROL_DN	244	-0.0902211	-0.813877	0.810277	0.861434	1	376	tags=32%, list=30%, signal=36%
INO4_SGA	17	-0.196929	-0.811024	0.694882	0.864924	1	245	tags=29%, list=19%, signal=36%
TRANSPORTER ACTIVITY_MOL	78	-0.119018	-0.811006	0.752049	0.863986	1	441	tags=44%, list=35%, signal=63%
HOP1_SGA	15	-0.211295	-0.81067	0.675573	0.863599	1	114	tags=20%, list=9%, signal=22%
SRY1_SGA	16	-0.201178	-0.809968	0.693957	0.863791	1	741	tags=81%, list=59%, signal=195%
NUCLEOSIDE-TRIPHOSPHATASE ACTIVITY_MOL	39	-0.145076	-0.809754	0.71345	0.863162	1	63	tags=8%, list=5%, signal=8%
DCC1_SGA	20	-0.182994	-0.809525	0.700599	0.862608	1	255	tags=30%, list=20%, signal=37%
SPT2_BIND	16	-0.196258	-0.808285	0.701754	0.863675	1	514	tags=56%, list=41%, signal=94%
SDC1_BIND	16	-0.198284	-0.808251	0.678439	0.862794	1	923	tags=94%, list=73%, signal=347%
CKA2_BIND	15	-0.20137	-0.804323	0.702756	0.868082	1	167	tags=27%, list=13%, signal=30%
PBS2_SGA	41	-0.141136	-0.803331	0.71719	0.868637	1	332	tags=32%, list=26%, signal=42%
REGULATION OF CELLULAR PROCESS_BIO	92	-0.11347	-0.803192	0.771894	0.867879	1	504	tags=48%, list=40%, signal=74%
SWF1_SGA	32	-0.157794	-0.800145	0.710117	0.871752	1	153	tags=19%, list=12%, signal=21%
POL12-TS_SGA	18	-0.188023	-0.800125	0.711155	0.870831	1	927	tags=94%, list=74%, signal=353%
ARF1_SGA	27	-0.164831	-0.799489	0.698189	0.870838	1	567	tags=59%, list=45%, signal=106%
SPF1_BIND	35	-0.149718	-0.799262	0.74187	0.87022	1	278	tags=31%, list=22%, signal=39%
ACH1_SGA	19	-0.187946	-0.798644	0.714567	0.870246	1	663	tags=79%, list=53%, signal=164%
MNN10_BIND	41	-0.137825	-0.798626	0.752896	0.869321	1	643	tags=63%, list=51%, signal=125%
GET2_SGA	59	-0.124247	-0.798383	0.730924	0.868827	1	550	tags=53%, list=44%, signal=89%
LIP5_BIND	15	-0.200965	-0.797055	0.708015	0.869951	1	1010	tags=100%, list=80%, signal=500%
CA21CHRRX4	36	-0.151693	-0.794727	0.72233	0.872742	1	198	tags=22%, list=16%, signal=26%
T4 LACTIC-VS-CONTROL_DN	278	-0.0869168	-0.793954	0.821782	0.87299	1	262	tags=22%, list=21%, signal=22%
RPS4B_BIND	19	-0.188322	-0.793907	0.681239	0.872109	1	665	tags=74%, list=53%, signal=154%
PHO80_SGA	27	-0.160684	-0.793381	0.711191	0.871997	1	332	tags=33%, list=26%, signal=44%
RAD27_BIND	28	-0.157094	-0.792347	0.735656	0.872671	1	270	tags=29%, list=21%, signal=36%
CPR7_SGA	16	-0.191914	-0.790322	0.712092	0.874777	1	464	tags=50%, list=37%, signal=78%
CDC73_BIND	32	-0.150997	-0.788744	0.73161	0.876329	1	332	tags=31%, list=26%, signal=41%
RPL9A_BIND	16	-0.188671	-0.787632	0.710417	0.877093	1	665	tags=75%, list=53%, signal=157%
RHO2_SGA	24	-0.16573	-0.786544	0.728	0.877842	1	406	tags=42%, list=32%, signal=60%
CDC11-5_SGA	48	-0.134049	-0.786503	0.758403	0.876973	1	174	tags=19%, list=14%, signal=21%
BST1_SGA	38	-0.140745	-0.785899	0.747104	0.876996	1	650	tags=68%, list=52%, signal=137%
ORC3-70_SGA	23	-0.172241	-0.785738	0.729008	0.87632	1	411	tags=43%, list=33%, signal=63%
HOM6_BIND	16	-0.196003	-0.784324	0.727811	0.877563	1	125	tags=19%, list=10%, signal=21%
MMF1_DAMP_SGA	20	-0.175232	-0.783487	0.74502	0.877905	1	167	tags=20%, list=13%, signal=23%
SWR1_BIND	27	-0.157736	-0.776206	0.743952	0.888093	1	463	tags=48%, list=37%, signal=75%
CA21CHR4X1	23	-0.168327	-0.775299	0.727455	0.888473	1	111	tags=17%, list=9%, signal=19%
CDC27-1_SGA	16	-0.192458	-0.775297	0.716632	0.887527	1	167	tags=25%, list=13%, signal=28%
HS_UP	32	-0.150038	-0.77266	0.747036	0.890632	1	210	tags=22%, list=17%, signal=26%
REGULATION OF BIOLOGICAL PROCESS_BIO	95	-0.104216	-0.772395	0.785992	0.89009	1	152	tags=16%, list=12%, signal=17%
CA21CHR6X3	18	-0.18147	-0.771826	0.753036	0.889997	1	217	tags=28%, list=17%, signal=33%
NUCLEOPLASM PART_CEL	30	-0.148113	-0.771733	0.763889	0.88918	1	284	tags=30%, list=23%, signal=38%
STM1_BIND	28	-0.154699	-0.769093	0.730693	0.892197	1	167	tags=18%, list=13%, signal=20%
CTF18_SGA	21	-0.174475	-0.766637	0.746063	0.894928	1	1044	tags=100%, list=83%, signal=576%
CA21CHRRX1	21	-0.168767	-0.765258	0.729249	0.896112	1	184	tags=24%, list=15%, signal=27%
SEC3_SGA	20	-0.174111	-0.764111	0.740741	0.896839	1	617	tags=65%, list=49%, signal=125%
PAT1_BIND	35	-0.14287	-0.76344	0.766208	0.896834	1	870	tags=86%, list=69%, signal=270%
IOC4_SGA	21	-0.171565	-0.761003	0.746094	0.899309	1	800	tags=86%, list=64%, signal=231%
RAD24_BIND	17	-0.186795	-0.759731	0.765873	0.90013	1	1028	tags=100%, list=82%, signal=538%
NEGATIVE REGULATION OF BIOLOGICAL PROCESS_BIO	32	-0.143856	-0.758918	0.781124	0.900396	1	387	tags=38%, list=31%, signal=53%
SWD1_SGA	18	-0.184884	-0.75791	0.799235	0.900857	1	452	tags=50%, list=36%, signal=77%
ORM2_BIND	20	-0.171788	-0.757467	0.754455	0.900554	1	963	tags=95%, list=76%, signal=398%
SPO19_SGA	17	-0.181273	-0.755692	0.747495	0.902109	1	584	tags=65%, list=46%, signal=119%
NEGATIVE REGULATION OF CELLULAR PROCESS_BIO	32	-0.143856	-0.752337	0.772201	0.905898	1	387	tags=38%, list=31%, signal=53%
IKI1_SGA	15	-0.186415	-0.752056	0.775551	0.905349	1	780	tags=87%, list=62%, signal=225%
GCN5_SGA	42	-0.133815	-0.748699	0.788732	0.909044	1	856	tags=86%, list=68%, signal=259%
RAD18_BIND	15	-0.186495	-0.745972	0.767308	0.911999	1	1028	tags=100%, list=82%, signal=539%
VPS8_BIND	34	-0.14064	-0.743635	0.783939	0.914353	1	30	tags=9%, list=2%, signal=9%
RTT109_BIND	19	-0.172764	-0.742176	0.795802	0.915352	1	351	tags=37%, list=28%, signal=50%
MTW1-TS_SGA	19	-0.173387	-0.742149	0.78327	0.914436	1	1045	tags=100%, list=83%, signal=579%
GSG1_SGA	35	-0.137894	-0.740129	0.797271	0.916173	1	652	tags=66%, list=52%, signal=133%
ENDOPLASMIC RETICULUM MEMBRANE_CEL	23	-0.157279	-0.739686	0.802682	0.915882	1	245	tags=26%, list=19%, signal=32%
SGF11_SGA	23	-0.160256	-0.739646	0.773737	0.914985	1	851	tags=87%, list=68%, signal=263%
ADO1_BIND	23	-0.159209	-0.739255	0.823062	0.914563	1	870	tags=87%, list=69%, signal=276%
TEL2-7_SGA	18	-0.174836	-0.73834	0.790795	0.914902	1	797	tags=83%, list=63%, signal=224%
RFX1P_TFMOTIF	15	-0.188404	-0.736437	0.795918	0.916504	1	305	tags=40%, list=24%, signal=52%
RIP1_SGA	25	-0.15058	-0.736348	0.803059	0.915682	1	550	tags=56%, list=44%, signal=97%
TSA1_BIND	15	-0.183048	-0.735917	0.797101	0.915299	1	63	tags=13%, list=5%, signal=14%
EAF3_BIND	18	-0.174002	-0.735564	0.795455	0.914818	1	533	tags=56%, list=42%, signal=95%
OCA1_BIND	19	-0.176218	-0.734862	0.782868	0.914836	1	99	tags=16%, list=8%, signal=17%
CA21CHRRX6	37	-0.132372	-0.734435	0.81893	0.914449	1	534	tags=51%, list=42%, signal=87%
NUCLEAR ENVELOPE-ENDOPLASMIC RETICULUM NETWORK_CEL	23	-0.157279	-0.733486	0.8107	0.914768	1	245	tags=26%, list=19%, signal=32%
T1 LACTIC-VS-CONTROL_DN	233	-0.0833349	-0.733441	0.917883	0.913877	1	411	tags=35%, list=33%, signal=42%
VPS41_BIND	20	-0.164677	-0.731538	0.779661	0.915447	1	222	tags=25%, list=18%, signal=30%
COG6_SGA	33	-0.137965	-0.7307	0.825103	0.915596	1	716	tags=70%, list=57%, signal=157%
CELLULAR CARBOHYDRATE METABOLIC PROCESS_BIO	27	-0.148048	-0.727124	0.823301	0.919194	1	396	tags=41%, list=31%, signal=58%
ICE2_SGA	35	-0.135483	-0.726858	0.808594	0.91856	1	910	tags=89%, list=72%, signal=311%
TYE7-UP-HPX	49	-0.120511	-0.724057	0.828063	0.921203	1	292	tags=29%, list=23%, signal=36%
YAK1_Y_UP	20	-0.161478	-0.723298	0.816956	0.921299	1	496	tags=50%, list=39%, signal=81%
GCR2_BIND	17	-0.171815	-0.723047	0.806324	0.920601	1	175	tags=24%, list=14%, signal=27%
MYO2-16_SGA	26	-0.151128	-0.719749	0.808554	0.923837	1	153	tags=19%, list=12%, signal=21%
EDS1_SGA	19	-0.163676	-0.719438	0.794118	0.923273	1	367	tags=42%, list=29%, signal=59%
TCP1-2_SGA	21	-0.160379	-0.718733	0.818008	0.923172	1	909	tags=90%, list=72%, signal=320%
PTC1_SGA	32	-0.139474	-0.718262	0.839252	0.922884	1	961	tags=94%, list=76%, signal=386%
PHB2_BIND	22	-0.15103	-0.713324	0.815643	0.928163	1	174	tags=18%, list=14%, signal=21%
ELP2_BIND	23	-0.153009	-0.713085	0.806084	0.927527	1	270	tags=30%, list=21%, signal=38%
CSM1_BIND	19	-0.163067	-0.712917	0.834343	0.926798	1	97	tags=16%, list=8%, signal=17%
CBT1_BIND	16	-0.177045	-0.710474	0.807018	0.928778	1	242	tags=31%, list=19%, signal=38%
RPC53_DAMP_SGA	21	-0.160897	-0.709645	0.794574	0.928833	1	521	tags=52%, list=41%, signal=88%
RIC1_BIND	65	-0.110663	-0.707112	0.847195	0.930968	1	870	tags=85%, list=69%, signal=260%
SRC1_SGA	20	-0.161449	-0.705567	0.815735	0.931953	1	153	tags=20%, list=12%, signal=22%
RPS24B_BIND	15	-0.178823	-0.704962	0.818882	0.931803	1	63	tags=13%, list=5%, signal=14%
ZAP1_UP	51	-0.115623	-0.702629	0.840385	0.933758	1	156	tags=18%, list=12%, signal=19%
HTZ1_SGA	24	-0.145933	-0.701538	0.847695	0.934145	1	870	tags=88%, list=69%, signal=278%
YFH1_DAMP_SGA	24	-0.149224	-0.701501	0.859849	0.933251	1	608	tags=63%, list=48%, signal=119%
CD_UP	16	-0.172339	-0.699537	0.832636	0.934592	1	455	tags=50%, list=36%, signal=77%
REGULATION OF NUCLEOBASE, NUCLEOSIDE, NUCLEOTIDE AND NUCLEIC ACID METABOLIC PROCESS_BIO	59	-0.108495	-0.697806	0.869231	0.935668	1	495	tags=46%, list=39%, signal=72%
NUP60_SGA	18	-0.168949	-0.697072	0.831014	0.935564	1	739	tags=78%, list=59%, signal=186%
LTE1_BIND	19	-0.16129	-0.696428	0.840691	0.935412	1	1060	tags=100%, list=84%, signal=623%
REGULATION OF CELLULAR METABOLIC PROCESS_BIO	69	-0.101901	-0.694951	0.859287	0.936189	1	504	tags=46%, list=40%, signal=73%
COG5_SGA	29	-0.136262	-0.69382	0.845996	0.936559	1	411	tags=38%, list=33%, signal=55%
MNN11_BIND	28	-0.138002	-0.692486	0.856566	0.937218	1	864	tags=86%, list=69%, signal=267%
FAB1_BIND	17	-0.164212	-0.690615	0.853465	0.938399	1	514	tags=53%, list=41%, signal=88%
ELP6_SGA	21	-0.156996	-0.688372	0.838095	0.940008	1	539	tags=57%, list=43%, signal=98%
DFG16_SGA	26	-0.141918	-0.687487	0.869307	0.940092	1	797	tags=81%, list=63%, signal=216%
HIR2_BIND	20	-0.158984	-0.686945	0.837255	0.939733	1	351	tags=35%, list=28%, signal=48%
SSD1_BIND	38	-0.126185	-0.68686	0.874743	0.938875	1	981	tags=92%, list=78%, signal=405%
TPS2_SGA	20	-0.156026	-0.685656	0.857418	0.939317	1	404	tags=40%, list=32%, signal=58%
PEX19_BIND	16	-0.170963	-0.684515	0.860784	0.939731	1	642	tags=69%, list=51%, signal=139%
EMG1_DAMP_SGA	15	-0.173633	-0.679573	0.866267	0.944333	1	1044	tags=100%, list=83%, signal=579%
HTZ1_BIND	38	-0.124272	-0.677126	0.890656	0.946121	1	895	tags=87%, list=71%, signal=291%
SLM3_BIND	19	-0.155328	-0.670986	0.878981	0.951781	1	514	tags=53%, list=41%, signal=88%
CKS1_BIND	16	-0.164937	-0.670925	0.840304	0.950913	1	794	tags=81%, list=63%, signal=217%
PET8_SGA	15	-0.170105	-0.670301	0.858847	0.950619	1	456	tags=47%, list=36%, signal=72%
MRE11_BIND	27	-0.13734	-0.668467	0.873727	0.95163	1	1028	tags=96%, list=82%, signal=514%
NEGATIVE REGULATION OF TRANSCRIPTION_BIO	23	-0.141915	-0.666984	0.853909	0.952321	1	87	tags=13%, list=7%, signal=14%
HMG1_SGA	20	-0.151534	-0.66654	0.859961	0.951816	1	252	tags=25%, list=20%, signal=31%
RRP6_BIND	15	-0.170632	-0.665996	0.866412	0.951465	1	535	tags=60%, list=42%, signal=103%
ERV25_BIND	20	-0.149111	-0.665362	0.875	0.951175	1	97	tags=15%, list=8%, signal=16%
POL32_SGA	25	-0.135926	-0.665057	0.875	0.950539	1	1013	tags=96%, list=80%, signal=482%
ORC2-2_SGA	46	-0.112541	-0.661962	0.891892	0.952818	1	514	tags=48%, list=41%, signal=78%
NEW1_BIND	24	-0.136715	-0.661869	0.875	0.951988	1	29	tags=8%, list=2%, signal=8%
HUR1_BIND	17	-0.162059	-0.661546	0.892495	0.95143	1	184	tags=24%, list=15%, signal=27%
MEMBRANE PART_CEL	88	-0.0911797	-0.660849	0.916168	0.951219	1	417	tags=38%, list=33%, signal=52%
NEGATIVE REGULATION OF TRANSCRIPTION, DNA-DEPENDENT_BIO	23	-0.141915	-0.658819	0.867173	0.9524	1	87	tags=13%, list=7%, signal=14%
FUS2_SGA	15	-0.16571	-0.656592	0.867675	0.953685	1	140	tags=20%, list=11%, signal=22%
GIM5_BIND	28	-0.131212	-0.654661	0.876494	0.954625	1	167	tags=18%, list=13%, signal=20%
CA21CHR2X10	28	-0.129264	-0.65391	0.89881	0.954411	1	433	tags=43%, list=34%, signal=64%
IFA38_BIND	16	-0.155525	-0.645697	0.896	0.961392	1	868	tags=88%, list=69%, signal=278%
CDC5_7H_DN	74	-0.0946508	-0.639258	0.911321	0.966378	1	300	tags=27%, list=24%, signal=33%
ALT1_SGA	25	-0.129965	-0.636892	0.906977	0.967593	1	174	tags=20%, list=14%, signal=23%
MON2_BIND	15	-0.161576	-0.635232	0.912951	0.96822	1	245	tags=27%, list=19%, signal=33%
SWP1_DAMP_SGA	42	-0.111372	-0.635105	0.917148	0.96742	1	391	tags=36%, list=31%, signal=50%
REGULATION OF METABOLIC PROCESS_BIO	72	-0.093368	-0.634039	0.929688	0.967449	1	504	tags=46%, list=40%, signal=72%
ARV1_SGA	15	-0.161127	-0.631831	0.897004	0.968476	1	851	tags=87%, list=68%, signal=264%
PRP4-TS_SGA	15	-0.153184	-0.630735	0.905622	0.968555	1	167	tags=20%, list=13%, signal=23%
OS(2006)_UP	33	-0.1186	-0.630656	0.906122	0.967675	1	1060	tags=97%, list=84%, signal=597%
TSC11-1_SGA	25	-0.13128	-0.629717	0.901354	0.96754	1	1098	tags=100%, list=87%, signal=766%
SLT2_BIND	24	-0.130826	-0.629636	0.903353	0.966685	1	1023	tags=96%, list=81%, signal=502%
NBP2_BIND	20	-0.144958	-0.629357	0.916191	0.965985	1	780	tags=80%, list=62%, signal=207%
BFR1_BIND	18	-0.14767	-0.628526	0.904854	0.965827	1	278	tags=28%, list=22%, signal=35%
BMH2_BIND	16	-0.158902	-0.628077	0.892925	0.965313	1	63	tags=13%, list=5%, signal=13%
ARO1_BIND	17	-0.151862	-0.627966	0.907258	0.964467	1	68	tags=12%, list=5%, signal=12%
CA21CHR3X9	31	-0.118613	-0.625714	0.912281	0.965548	1	660	tags=65%, list=52%, signal=132%
SPT4_BIND	19	-0.147394	-0.625479	0.918406	0.964838	1	452	tags=47%, list=36%, signal=73%
VRP1_BIND	34	-0.118506	-0.622025	0.903162	0.966983	1	228	tags=21%, list=18%, signal=24%
SUR4_BIND	24	-0.134348	-0.621727	0.91945	0.966315	1	179	tags=21%, list=14%, signal=24%
APQ12_BIND	24	-0.133743	-0.620842	0.912955	0.966128	1	212	tags=21%, list=17%, signal=25%
MED1_SGA	23	-0.13178	-0.619136	0.907025	0.966647	1	408	tags=39%, list=32%, signal=57%
NUCLEOPLASM_CEL	33	-0.116961	-0.617216	0.901381	0.967279	1	284	tags=27%, list=23%, signal=34%
CYR1_YEAST_UP	54	-0.100738	-0.615317	0.905697	0.967973	1	96	tags=11%, list=8%, signal=12%
IES1_BIND	22	-0.13404	-0.612983	0.918033	0.968982	1	174	tags=18%, list=14%, signal=21%
PRB1_SGA	25	-0.131444	-0.610841	0.920319	0.969749	1	542	tags=52%, list=43%, signal=89%
BMH1_BIND	24	-0.129899	-0.61079	0.921649	0.968862	1	87	tags=13%, list=7%, signal=13%
TRANSCRIPTION REGULATOR ACTIVITY_MOL	53	-0.100338	-0.608886	0.931559	0.96947	1	167	tags=17%, list=13%, signal=19%
UBP3_BIND	40	-0.106528	-0.606527	0.934489	0.970335	1	196	tags=18%, list=16%, signal=20%
CA21CHR3X4	34	-0.110207	-0.603361	0.928302	0.971828	1	400	tags=38%, list=32%, signal=55%
ERG25_DAMP_SGA	26	-0.124016	-0.599633	0.918868	0.973619	1	179	tags=19%, list=14%, signal=22%
HPC2_BIND	16	-0.147741	-0.599616	0.903955	0.972711	1	429	tags=44%, list=34%, signal=66%
FLX1_SGA	24	-0.125499	-0.597513	0.920605	0.973374	1	415	tags=38%, list=33%, signal=55%
ARP6_BIND	35	-0.110101	-0.586307	0.940075	0.980468	1	184	tags=17%, list=15%, signal=20%
ORC2-4_SGA	18	-0.134854	-0.586153	0.934701	0.979637	1	76	tags=11%, list=6%, signal=12%
TRANSCRIPTION_BIO	69	-0.0868055	-0.58448	0.968254	0.97989	1	255	tags=22%, list=20%, signal=26%
SPT3_BIND	32	-0.109634	-0.579256	0.949495	0.982487	1	92	tags=13%, list=7%, signal=13%
NEGATIVE REGULATION OF NUCLEOBASE, NUCLEOSIDE, NUCLEOTIDE AND NUCLEIC ACID METABOLIC PROCESS_BIO	26	-0.119957	-0.577181	0.928429	0.982912	1	87	tags=12%, list=7%, signal=12%
TOP1_BIND	18	-0.138324	-0.572135	0.9591	0.985166	1	509	tags=50%, list=40%, signal=83%
AIM4_BIND	19	-0.132858	-0.570605	0.960417	0.985153	1	910	tags=89%, list=72%, signal=318%
GAS1_SGA	34	-0.104912	-0.569486	0.95977	0.984903	1	643	tags=62%, list=51%, signal=123%
CHS5_SGA	26	-0.114277	-0.566364	0.946429	0.985872	1	803	tags=81%, list=64%, signal=218%
SSA2_BIND	19	-0.130616	-0.562684	0.960076	0.987098	1	896	tags=89%, list=71%, signal=306%
CIK1_SGA	58	-0.0888283	-0.555802	0.967413	0.990121	1	308	tags=26%, list=24%, signal=33%
BMH1_SGA	15	-0.14115	-0.554708	0.946746	0.989804	1	777	tags=80%, list=62%, signal=206%
VPS71_BIND	36	-0.103051	-0.549366	0.965714	0.991745	1	895	tags=86%, list=71%, signal=289%
AIM44_SGA	41	-0.0954047	-0.548812	0.971275	0.991106	1	57	tags=7%, list=5%, signal=7%
FEN1_BIND	20	-0.124129	-0.544274	0.95069	0.992522	1	864	tags=85%, list=69%, signal=267%
TUB3_BIND	17	-0.131032	-0.544103	0.968064	0.991689	1	895	tags=88%, list=71%, signal=301%
VMA13_SGA	19	-0.126899	-0.541825	0.96988	0.991923	1	1001	tags=95%, list=80%, signal=455%
SSB2_BIND	16	-0.136935	-0.540076	0.941767	0.991842	1	808	tags=81%, list=64%, signal=224%
CHD1_BIND	22	-0.116296	-0.538972	0.970472	0.991482	1	184	tags=18%, list=15%, signal=21%
COG6_BIND	30	-0.103055	-0.534302	0.958498	0.99287	1	870	tags=83%, list=69%, signal=263%
SRO7_BIND	19	-0.122965	-0.530248	0.975904	0.993792	1	981	tags=95%, list=78%, signal=423%
RVS167_BIND	36	-0.0968755	-0.527023	0.974806	0.994304	1	19	tags=6%, list=2%, signal=5%
GCN20_BIND	18	-0.12275	-0.520779	0.984526	0.996051	1	82	tags=11%, list=7%, signal=12%
TRANSCRIPTION, DNA-DEPENDENT_BIO	66	-0.0793641	-0.520734	0.984375	0.99515	1	255	tags=21%, list=20%, signal=25%
RNA BIOSYNTHETIC PROCESS_BIO	66	-0.0793641	-0.517717	0.977131	0.995447	1	255	tags=21%, list=20%, signal=25%
NEGATIVE REGULATION OF METABOLIC PROCESS_BIO	29	-0.103138	-0.516088	0.985185	0.995221	1	387	tags=34%, list=31%, signal=49%
ELP4_BIND	20	-0.116187	-0.516008	0.968504	0.994327	1	184	tags=20%, list=15%, signal=23%
NEGATIVE REGULATION OF CELLULAR METABOLIC PROCESS_BIO	28	-0.104588	-0.515767	0.974409	0.993496	1	87	tags=11%, list=7%, signal=11%
INO2_SGA	26	-0.108514	-0.513033	0.972868	0.993677	1	99	tags=12%, list=8%, signal=12%
OPI1_BIND	15	-0.128964	-0.50841	0.982626	0.994475	1	15	tags=7%, list=1%, signal=7%
LCB1-5_SGA	26	-0.0995746	-0.496357	0.982283	0.997688	1	204	tags=19%, list=16%, signal=22%
CKA1_BIND	18	-0.117417	-0.494009	0.97456	0.997498	1	487	tags=44%, list=39%, signal=71%
TRANSFERASE ACTIVITY, TRANSFERRING GLYCOSYL GROUPS_MOL	23	-0.102751	-0.489986	0.981519	0.997771	1	1133	tags=100%, list=90%, signal=981%
YCS4-1_SGA	24	-0.105113	-0.483945	0.986328	0.998533	1	494	tags=46%, list=39%, signal=74%
NUP84_BIND	22	-0.105553	-0.482903	0.983486	0.997902	1	909	tags=86%, list=72%, signal=305%
POL30_BIND	29	-0.0963439	-0.481942	0.993865	0.997225	1	922	tags=86%, list=73%, signal=315%
BUB3_BIND	29	-0.0952908	-0.48012	0.988235	0.996775	1	270	tags=24%, list=21%, signal=30%
SUR1_BIND	23	-0.101938	-0.478948	0.98125	0.996156	1	628	tags=61%, list=50%, signal=119%
CA21CHR4X6	15	-0.122772	-0.473455	0.992095	0.996612	1	589	tags=60%, list=47%, signal=111%
CA21CHRRX5	39	-0.081851	-0.466589	0.991886	0.997252	1	138	tags=13%, list=11%, signal=14%
CEG1-TS_SGA	18	-0.108705	-0.46028	0.988395	0.997656	1	152	tags=17%, list=12%, signal=19%
CA21CHRRX7	25	-0.0959093	-0.458619	0.989733	0.997049	1	534	tags=48%, list=42%, signal=82%
MSC1_BIND	30	-0.0913395	-0.45615	0.994118	0.996628	1	480	tags=43%, list=38%, signal=68%
TLG2_BIND	30	-0.0844713	-0.437555	0.989496	0.99873	1	533	tags=47%, list=42%, signal=79%
PMR1_BIND	35	-0.0810502	-0.436914	0.992453	0.997889	1	270	tags=23%, list=21%, signal=28%
VPS72_BIND	35	-0.0800672	-0.428703	0.992063	0.998053	1	87	tags=9%, list=7%, signal=9%
TEF4_BIND	16	-0.103283	-0.428094	0.998084	0.997211	1	765	tags=75%, list=61%, signal=189%
PROTEIN BINDING_MOL	29	-0.0824785	-0.423709	0.998103	0.996794	1	964	tags=90%, list=77%, signal=374%
GET1_BIND	45	-0.0700913	-0.408748	1	0.997227	1	922	tags=84%, list=73%, signal=304%

## Sheet: GSEA sth1 RNAseq pos
NAME	SIZE	ES	NES	NOM p-val	FDR q-val	FWER p-val	RANK AT MAX	LEADING EDGE
OPAQUE_2_UP	65	0.552256	3.62161	0	0	0	254	tags=63%, list=20%, signal=75%
T1 BUTYRIC-VS-CONTROL_UP	100	0.467825	3.4798	0	0	0	361	tags=68%, list=29%, signal=88%
T4 ACETIC-VS-CONTROL_UP	132	0.406608	3.28369	0	0	0	315	tags=57%, list=25%, signal=68%
UPC2_DN	44	0.551815	3.27562	0	0	0	215	tags=61%, list=17%, signal=71%
T1 PROPIONIC-VS-CONTROL_UP	112	0.406059	3.13786	0	0	0	361	tags=61%, list=29%, signal=78%
SCL1_BIND	19	0.602233	2.72225	0	9.67816e-05	0.001	466	tags=95%, list=37%, signal=148%
PRE10_BIND	18	0.616493	2.64358	0	0.000566964	0.007	445	tags=94%, list=35%, signal=144%
CELL SURFACE_CEL	38	0.474257	2.62334	0	0.000567113	0.008	243	tags=53%, list=19%, signal=63%
T4 BUTYRIC-VS-CONTROL_UP	158	0.315974	2.61297	0	0.000567058	0.009	361	tags=51%, list=29%, signal=63%
T4 PROPIONIC-VS-CONTROL_UP	129	0.32546	2.58107	0	0.000736178	0.013	316	tags=49%, list=25%, signal=59%
PROTEASOME COMPLEX (SENSU EUKARYOTA)_CEL	20	0.568174	2.57405	0	0.000769951	0.015	466	tags=90%, list=37%, signal=141%
ENDOPEPTIDASE ACTIVITY_MOL	26	0.52479	2.55939	0	0.000796795	0.016	566	tags=96%, list=45%, signal=171%
RPN8_BIND	21	0.558966	2.55478	0	0.000735503	0.016	566	tags=100%, list=45%, signal=179%
PUP2_BIND	17	0.596478	2.52242	0	0.000802344	0.019	466	tags=94%, list=37%, signal=147%
PUP1_BIND	17	0.595803	2.51385	0	0.000861287	0.022	466	tags=94%, list=37%, signal=147%
CCR4_UP	32	0.471883	2.50949	0	0.000873696	0.024	302	tags=63%, list=24%, signal=80%
HYPHAE FBS37 (NANTEL)_UP	20	0.568541	2.49811	0	0.00101909	0.03	172	tags=60%, list=14%, signal=68%
PHO4-DOWN	56	0.395693	2.49262	0	0.000962475	0.03	181	tags=43%, list=14%, signal=48%
SIT4_HYPHAE_DN	18	0.583985	2.48385	0	0.00108727	0.036	249	tags=67%, list=20%, signal=82%
T1 LACTIC-VS-CONTROL_UP	39	0.44329	2.45876	0	0.00147745	0.051	303	tags=62%, list=24%, signal=79%
PRE8_BIND	16	0.592395	2.44627	0	0.00156763	0.057	466	tags=94%, list=37%, signal=147%
PRE5_BIND	19	0.562348	2.43258	0	0.00182512	0.07	466	tags=89%, list=37%, signal=140%
SKO1_DN	76	0.350203	2.40915	0	0.00201731	0.08	257	tags=45%, list=20%, signal=53%
PRE6_BIND	18	0.560838	2.39271	0	0.00225707	0.093	562	tags=100%, list=45%, signal=178%
RPN7_BIND	17	0.557166	2.39086	0	0.00221178	0.095	566	tags=100%, list=45%, signal=179%
RPN3_BIND	18	0.560838	2.39058	0	0.00212671	0.095	562	tags=100%, list=45%, signal=178%
RPN11_BIND	19	0.552396	2.38757	0	0.00213149	0.097	466	tags=89%, list=37%, signal=140%
XS(2006)_DN	78	0.340214	2.367	0	0.00252883	0.118	484	tags=68%, list=38%, signal=104%
RPT2_BIND	15	0.588513	2.33312	0	0.00345889	0.166	466	tags=93%, list=37%, signal=146%
PROTEIN CATABOLIC PROCESS_BIO	31	0.446832	2.33068	0	0.00349529	0.172	466	tags=81%, list=37%, signal=125%
CA21CHR1X5	18	0.524343	2.32532	0	0.00350838	0.176	266	tags=61%, list=21%, signal=76%
MODIFICATION-DEPENDENT MACROMOLECULE CATABOLIC PROCESS_BIO	24	0.483386	2.31139	0	0.00373245	0.193	566	tags=96%, list=45%, signal=171%
RPT3_BIND	20	0.513887	2.30809	0.00204082	0.00372085	0.198	562	tags=95%, list=45%, signal=169%
CELLULAR PROTEIN CATABOLIC PROCESS_BIO	27	0.459345	2.3044	0	0.00375737	0.205	466	tags=81%, list=37%, signal=127%
T4 LACTIC-VS-CONTROL_UP	50	0.38235	2.30152	0.00194175	0.00379223	0.213	307	tags=56%, list=24%, signal=71%
UBIQUITIN-DEPENDENT PROTEIN CATABOLIC PROCESS_BIO	24	0.483386	2.29719	0	0.00378025	0.218	566	tags=96%, list=45%, signal=171%
PEPTIDASE ACTIVITY_MOL	34	0.428405	2.29002	0	0.00387436	0.226	566	tags=88%, list=45%, signal=156%
MODIFICATION-DEPENDENT PROTEIN CATABOLIC PROCESS_BIO	24	0.483386	2.28597	0	0.00396487	0.233	566	tags=96%, list=45%, signal=171%
RPT6_BIND	23	0.47851	2.25775	0	0.00486981	0.291	566	tags=91%, list=45%, signal=163%
PROTEOLYSIS_BIO	31	0.435904	2.24384	0	0.005277	0.319	566	tags=90%, list=45%, signal=160%
CAP2_UP	78	0.321039	2.21664	0	0.00669289	0.381	256	tags=44%, list=20%, signal=51%
YAK1_H_UP	96	0.300562	2.21328	0	0.00673337	0.39	573	tags=74%, list=46%, signal=125%
OPAQUE_UP	44	0.368831	2.19637	0	0.00761759	0.439	394	tags=64%, list=31%, signal=89%
RPN6_BIND	18	0.519205	2.19392	0.00198807	0.00757147	0.443	466	tags=89%, list=37%, signal=139%
PROTEOLYSIS INVOLVED IN CELLULAR PROTEIN CATABOLIC PROCESS_BIO	25	0.45047	2.19109	0.00199601	0.00760244	0.452	566	tags=92%, list=45%, signal=164%
RRNA PROCESSING_BIO	19	0.497358	2.17172	0.0019802	0.0087054	0.512	146	tags=47%, list=12%, signal=53%
RPT5_BIND	19	0.50443	2.15347	0	0.00973481	0.56	566	tags=95%, list=45%, signal=170%
OS_DN	49	0.346609	2.13912	0	0.0107235	0.599	177	tags=43%, list=14%, signal=48%
RPN12_BIND	18	0.488963	2.11377	0.00421053	0.0128543	0.681	466	tags=83%, list=37%, signal=130%
RPT1_BIND	20	0.470476	2.06913	0	0.0177794	0.803	562	tags=90%, list=45%, signal=160%
RPN2_BIND	17	0.479409	2.0604	0.00194553	0.0185291	0.823	486	tags=82%, list=39%, signal=132%
DRS2_BIND	18	0.473006	2.05637	0	0.0186806	0.834	671	tags=100%, list=53%, signal=211%
PRE3_BIND	15	0.523425	2.0486	0	0.0194668	0.854	466	tags=87%, list=37%, signal=136%
PLASMA MEMBRANE_CEL	57	0.31705	2.01872	0.0020284	0.0235124	0.908	323	tags=47%, list=26%, signal=61%
RPN1_BIND	17	0.482735	2.01643	0.00414079	0.0234502	0.913	486	tags=82%, list=39%, signal=132%
PRE1_BIND	15	0.510172	2.00804	0.00604839	0.0245563	0.916	466	tags=87%, list=37%, signal=136%
IRE1_BIND	28	0.390444	2.00694	0.00191205	0.0243107	0.917	573	tags=86%, list=46%, signal=154%
PRE2_BIND	17	0.475131	1.99742	0.00643777	0.0255567	0.933	466	tags=82%, list=37%, signal=129%
RIBOSOME BIOGENESIS AND ASSEMBLY_BIO	28	0.403534	1.99224	0.00193424	0.026066	0.938	253	tags=46%, list=20%, signal=57%
HOMEOSTATIC PROCESS_BIO	24	0.415895	1.98607	0.00421941	0.0268036	0.946	275	tags=58%, list=22%, signal=73%
SWI4SWI6_DN	63	0.303117	1.97106	0	0.0289523	0.96	485	tags=70%, list=39%, signal=108%
SAK1-UP	87	0.269937	1.95667	0	0.031563	0.971	564	tags=69%, list=45%, signal=116%
CELL WALL_CEL	29	0.385613	1.9509	0.010101	0.0322098	0.975	229	tags=41%, list=18%, signal=49%
EXTERNAL ENCAPSULATING STRUCTURE_CEL	29	0.385613	1.94912	0.00618557	0.0319956	0.977	229	tags=41%, list=18%, signal=49%
NRM1-UP	21	0.429544	1.94901	0.00649351	0.0315378	0.977	145	tags=38%, list=12%, signal=42%
RRNA METABOLIC PROCESS_BIO	21	0.429581	1.9399	0	0.0331503	0.982	253	tags=52%, list=20%, signal=64%
ER TO GOLGI VESICLE-MEDIATED TRANSPORT_BIO	16	0.472183	1.93416	0.00408163	0.0340326	0.984	571	tags=94%, list=45%, signal=169%
RIBONUCLEOPROTEIN COMPLEX BIOGENESIS AND ASSEMBLY_BIO	31	0.365557	1.92566	0.00222222	0.035487	0.985	253	tags=42%, list=20%, signal=51%
REGULATION OF BIOLOGICAL QUALITY_BIO	33	0.359138	1.92497	0.00396825	0.0351534	0.985	290	tags=55%, list=23%, signal=69%
WHITE_2_UP	79	0.270943	1.92464	0.00571429	0.034691	0.985	292	tags=43%, list=23%, signal=53%
CELL WALL ORGANIZATION AND BIOGENESIS_BIO	30	0.367029	1.91944	0.00594059	0.0352518	0.986	282	tags=47%, list=22%, signal=59%
CATABOLIC PROCESS_BIO	67	0.287423	1.91416	0.00770713	0.0358748	0.99	466	tags=61%, list=37%, signal=92%
EXTERNAL ENCAPSULATING STRUCTURE ORGANIZATION AND BIOGENESIS_BIO	30	0.367029	1.90323	0.00816326	0.0380857	0.993	282	tags=47%, list=22%, signal=59%
RER1_BIND	16	0.472245	1.90067	0.0101215	0.0382202	0.995	671	tags=100%, list=53%, signal=211%
CELLULAR MACROMOLECULE CATABOLIC PROCESS_BIO	37	0.344579	1.89434	0.00397614	0.0393398	0.996	466	tags=70%, list=37%, signal=108%
OS(2006)_DN	25	0.373699	1.84274	0.0123711	0.0543484	0.999	181	tags=44%, list=14%, signal=50%
CELL HOMEOSTASIS_BIO	23	0.40099	1.82845	0.0100604	0.0588442	0.999	275	tags=57%, list=22%, signal=71%
PRE9_BIND	36	0.329187	1.80061	0.00601202	0.0690351	0.999	502	tags=72%, list=40%, signal=117%
RPT4_BIND	15	0.448294	1.79566	0.010395	0.0701281	0.999	481	tags=80%, list=38%, signal=128%
CHEMICAL HOMEOSTASIS_BIO	18	0.410893	1.79256	0.00982318	0.0705224	0.999	275	tags=56%, list=22%, signal=70%
SRC1_BIND	15	0.444826	1.78556	0.014553	0.0727272	1	566	tags=87%, list=45%, signal=156%
ZAP1_DN	63	0.272158	1.78285	0.00954198	0.0729949	1	353	tags=48%, list=28%, signal=63%
CELL DIVISION_BIO	23	0.382957	1.7774	0.0107296	0.0746735	1	282	tags=52%, list=22%, signal=66%
HS_DN	42	0.309747	1.75901	0.0063425	0.0825069	1	418	tags=57%, list=33%, signal=83%
GOLGI-ASSOCIATED VESICLE_CEL	16	0.431335	1.7502	0.0227743	0.0859161	1	556	tags=88%, list=44%, signal=155%
GLD_UP	58	0.269413	1.74507	0.0127389	0.087619	1	135	tags=26%, list=11%, signal=28%
G1-S CLUSTER	56	0.270917	1.73886	0.0102881	0.0899745	1	558	tags=71%, list=44%, signal=123%
MACROMOLECULE CATABOLIC PROCESS_BIO	43	0.304676	1.73561	0.0125523	0.0907354	1	466	tags=67%, list=37%, signal=103%
ION HOMEOSTASIS_BIO	18	0.410893	1.73465	0.022	0.0901662	1	275	tags=56%, list=22%, signal=70%
CELL ION HOMEOSTASIS_BIO	17	0.40961	1.7257	0.0256959	0.093868	1	191	tags=47%, list=15%, signal=55%
CA21CHRRX12	28	0.33866	1.71776	0.0117647	0.0975117	1	415	tags=64%, list=33%, signal=94%
MULTI-ORGANISM PROCESS_BIO	41	0.296941	1.71565	0.0140845	0.0977416	1	290	tags=44%, list=23%, signal=55%
CATION HOMEOSTASIS_BIO	17	0.40961	1.70904	0.0189873	0.100325	1	191	tags=47%, list=15%, signal=55%
BIOPOLYMER CATABOLIC PROCESS_BIO	37	0.30887	1.7083	0.0158416	0.0996777	1	466	tags=68%, list=37%, signal=104%
RPN10_BIND	47	0.290903	1.70304	0.02079	0.101794	1	466	tags=62%, list=37%, signal=94%
CA21CHR7X4	24	0.363058	1.69258	0.0338645	0.106874	1	256	tags=46%, list=20%, signal=56%
COATED VESICLE_CEL	16	0.403209	1.66179	0.0403846	0.125555	1	581	tags=88%, list=46%, signal=160%
CYTOPLASMIC VESICLE_CEL	19	0.376889	1.65929	0.0303644	0.126157	1	581	tags=84%, list=46%, signal=154%
VESICLE_CEL	19	0.376889	1.6502	0.033264	0.131238	1	581	tags=84%, list=46%, signal=154%
RNA BINDING_MOL	18	0.37814	1.64907	0.03125	0.13067	1	330	tags=56%, list=26%, signal=74%
YAK1_Y_DN	61	0.251591	1.63938	0.019084	0.136419	1	448	tags=59%, list=36%, signal=87%
T4 HCL-VS-CONTROL_DN	16	0.410819	1.63515	0.0456349	0.138061	1	212	tags=50%, list=17%, signal=59%
HU_2H_UP	38	0.289953	1.62594	0.0344828	0.143742	1	329	tags=50%, list=26%, signal=66%
T1 ACETIC-VS-CONTROL_UP	45	0.27117	1.60864	0.0357853	0.156228	1	315	tags=47%, list=25%, signal=60%
REPRODUCTION OF A SINGLE-CELLED ORGANISM_BIO	20	0.360165	1.60063	0.0344828	0.161427	1	282	tags=50%, list=22%, signal=63%
OS(HOG1)_UP	15	0.397116	1.59881	0.0564516	0.161572	1	500	tags=80%, list=40%, signal=131%
UBX2_BIND	15	0.409257	1.58144	0.0511727	0.175265	1	656	tags=93%, list=52%, signal=193%
CYTOPLASMIC MEMBRANE-BOUND VESICLE_CEL	18	0.369367	1.57685	0.0404858	0.177726	1	581	tags=83%, list=46%, signal=153%
SRS2_BIND	17	0.385182	1.57502	0.0654008	0.17769	1	427	tags=71%, list=34%, signal=105%
CWH41_BIND	15	0.397517	1.56638	0.0554455	0.184095	1	166	tags=40%, list=13%, signal=46%
SECRETION BY CELL_BIO	40	0.275745	1.56403	0.0484848	0.184814	1	742	tags=88%, list=59%, signal=206%
SECRETION_BIO	40	0.275745	1.55846	0.0470348	0.188437	1	742	tags=88%, list=59%, signal=206%
MEMBRANE-BOUND VESICLE_CEL	18	0.369367	1.55831	0.0582121	0.186894	1	581	tags=83%, list=46%, signal=153%
PFK2_BIND	18	0.354507	1.55452	0.0531697	0.188982	1	399	tags=61%, list=32%, signal=88%
CA21CHR3X5	25	0.321995	1.5418	0.0490196	0.199349	1	364	tags=52%, list=29%, signal=72%
HYPHAE_SPIDER_UP	39	0.269995	1.53986	0.0552147	0.199467	1	337	tags=49%, list=27%, signal=64%
REPRODUCTION_BIO	21	0.338595	1.52024	0.0647182	0.218132	1	282	tags=48%, list=22%, signal=60%
LIPID METABOLIC PROCESS_BIO	37	0.273859	1.51769	0.0626263	0.219059	1	139	tags=24%, list=11%, signal=27%
GOLGI APPARATUS_CEL	31	0.286736	1.51499	0.0583804	0.220147	1	682	tags=84%, list=54%, signal=178%
TBF1P_TFMOTIF	75	0.219378	1.51011	0.0498084	0.223761	1	435	tags=51%, list=35%, signal=73%
CA21CHRRX11	27	0.297683	1.50911	0.0673469	0.22305	1	415	tags=59%, list=33%, signal=87%
MEMBRANE-ENCLOSED LUMEN_CEL	64	0.226927	1.50731	0.0364372	0.223242	1	295	tags=38%, list=23%, signal=46%
ORGANELLE LUMEN_CEL	64	0.226927	1.49345	0.0557692	0.236688	1	295	tags=38%, list=23%, signal=46%
NUCLEAR LUMEN_CEL	43	0.260036	1.48767	0.0806452	0.241427	1	295	tags=42%, list=23%, signal=53%
UBR1_BIND	15	0.364161	1.4876	0.103306	0.239545	1	397	tags=67%, list=32%, signal=96%
CDC5_9H_UP	24	0.305335	1.4759	0.0831556	0.25077	1	443	tags=58%, list=35%, signal=88%
SECRETORY PATHWAY_BIO	37	0.266567	1.46401	0.0598456	0.263148	1	571	tags=70%, list=45%, signal=125%
T1 ACETIC-VS-CONTROL_DN	30	0.277433	1.44191	0.0757282	0.289271	1	211	tags=33%, list=17%, signal=39%
CA21CHR1X15	20	0.323545	1.43096	0.0824295	0.301797	1	88	tags=25%, list=7%, signal=26%
MRT4_BIND	19	0.330469	1.41576	0.108696	0.320607	1	172	tags=37%, list=14%, signal=42%
CELL MORPHOGENESIS_BIO	26	0.287648	1.40944	0.0969072	0.327369	1	296	tags=46%, list=24%, signal=59%
CELLULAR STRUCTURE MORPHOGENESIS_BIO	26	0.287648	1.40541	0.106426	0.330821	1	296	tags=46%, list=24%, signal=59%
ANATOMICAL STRUCTURE DEVELOPMENT_BIO	26	0.287648	1.3996	0.0859375	0.336812	1	296	tags=46%, list=24%, signal=59%
ANATOMICAL STRUCTURE MORPHOGENESIS_BIO	26	0.287648	1.39285	0.105495	0.344577	1	296	tags=46%, list=24%, signal=59%
RNA PROCESSING_BIO	34	0.25627	1.39126	0.104563	0.344506	1	253	tags=35%, list=20%, signal=43%
DEVELOPMENTAL PROCESS_BIO	35	0.254117	1.38964	0.125245	0.344352	1	296	tags=43%, list=24%, signal=54%
SWI4SWI6_UP	88	0.19415	1.38435	0.104294	0.349709	1	219	tags=28%, list=17%, signal=32%
UBR2_BIND	20	0.303458	1.37578	0.104938	0.360013	1	506	tags=70%, list=40%, signal=115%
CHROMOSOME_CEL	20	0.303502	1.3732	0.114286	0.36133	1	475	tags=70%, list=38%, signal=111%
SAK1-DOWN	32	0.258344	1.36436	0.102041	0.372525	1	191	tags=34%, list=15%, signal=39%
CELLULAR CATABOLIC PROCESS_BIO	58	0.210849	1.36056	0.116	0.375945	1	466	tags=57%, list=37%, signal=86%
CA21CHR2X1	24	0.284323	1.35687	0.14741	0.379123	1	75	tags=21%, list=6%, signal=22%
CHROMOSOMAL PART_CEL	18	0.313913	1.35637	0.117895	0.377255	1	475	tags=72%, list=38%, signal=114%
GCN4_GCN2_UP	25	0.285724	1.35468	0.132114	0.377175	1	501	tags=68%, list=40%, signal=111%
CELL CYCLE-MODULATED	99	0.182203	1.34435	0.0870445	0.391592	1	558	tags=64%, list=44%, signal=105%
MAD2_BIND	18	0.31986	1.34412	0.157895	0.389208	1	404	tags=67%, list=32%, signal=97%
ENDOPLASMIC RETICULUM_CEL	50	0.215675	1.33534	0.114458	0.401104	1	350	tags=42%, list=28%, signal=56%
RAD23_BIND	19	0.305214	1.32833	0.152866	0.410016	1	510	tags=68%, list=41%, signal=113%
HYDROLASE ACTIVITY, ACTING ON ESTER BONDS_MOL	38	0.23902	1.32376	0.128964	0.414981	1	155	tags=24%, list=12%, signal=26%
CA21CHR1X12	43	0.225619	1.32061	0.131959	0.4175	1	216	tags=30%, list=17%, signal=35%
HAC1_BIND	27	0.266348	1.31731	0.151874	0.420399	1	521	tags=70%, list=41%, signal=117%
GLD-DOWN	20	0.291151	1.31256	0.156904	0.425725	1	437	tags=60%, list=35%, signal=90%
CATION TRANSPORT_BIO	15	0.332438	1.31121	0.148454	0.425101	1	190	tags=40%, list=15%, signal=47%
MCM1_TF	57	0.205144	1.2994	0.143701	0.442954	1	401	tags=44%, list=32%, signal=61%
OST3_BIND	21	0.29122	1.29837	0.188492	0.441793	1	166	tags=33%, list=13%, signal=38%
NITROSATIVE STRESS	17	0.305887	1.2876	0.154158	0.457938	1	314	tags=59%, list=25%, signal=77%
CSM3_BIND	17	0.303447	1.27819	0.175705	0.472196	1	544	tags=76%, list=43%, signal=133%
XS_DN	34	0.234073	1.27	0.172199	0.48445	1	254	tags=32%, list=20%, signal=39%
GLO3_BIND	24	0.270724	1.26725	0.208333	0.486501	1	580	tags=75%, list=46%, signal=136%
XRS2_BIND	20	0.290037	1.26216	0.189796	0.493091	1	483	tags=70%, list=38%, signal=112%
CYR1_HYPHAE_UP	72	0.18359	1.26207	0.169165	0.490205	1	394	tags=46%, list=31%, signal=63%
INTEGRAL TO MEMBRANE_CEL	37	0.225314	1.25812	0.186192	0.494782	1	213	tags=30%, list=17%, signal=35%
CA21CHR2X7	24	0.260376	1.25353	0.186747	0.500746	1	310	tags=42%, list=25%, signal=54%
RIM101P_TFMOTIF	59	0.193386	1.25077	0.198758	0.50297	1	105	tags=17%, list=8%, signal=18%
AFT2P_TFMOTIF	24	0.259996	1.24834	0.173653	0.504494	1	91	tags=21%, list=7%, signal=22%
DCC1_BIND	22	0.269567	1.23552	0.224066	0.526354	1	566	tags=77%, list=45%, signal=138%
CA21CHR2X8	25	0.256633	1.23214	0.214429	0.529845	1	252	tags=32%, list=20%, signal=39%
PPZ1_BIND	19	0.291262	1.22962	0.234927	0.531659	1	490	tags=68%, list=39%, signal=110%
CA21CHRRX2	24	0.2551	1.22378	0.222672	0.540002	1	289	tags=42%, list=23%, signal=53%
RESPONSE TO CHEMICAL STIMULUS_BIO	35	0.221651	1.21938	0.222222	0.545643	1	273	tags=40%, list=22%, signal=50%
TRANSFERASE ACTIVITY, TRANSFERRING PHOSPHORUS-CONTAINING GROUPS_MOL	38	0.214486	1.21401	0.228175	0.553421	1	399	tags=45%, list=32%, signal=64%
CHITIN- AND BETA-GLUCAN-CONTAINING CELL WALL_CEL	21	0.264199	1.19755	0.252049	0.584012	1	229	tags=33%, list=18%, signal=40%
RRP8_SGA	17	0.283257	1.19227	0.243083	0.59203	1	804	tags=94%, list=64%, signal=257%
CA21CHR1X13	32	0.223519	1.18031	0.238193	0.614728	1	87	tags=19%, list=7%, signal=20%
HSC82_BIND	20	0.262802	1.17663	0.248497	0.619371	1	360	tags=50%, list=29%, signal=69%
LHS1_BIND	22	0.258594	1.17477	0.263566	0.620108	1	645	tags=77%, list=51%, signal=156%
SGS1_BIND	17	0.284427	1.17238	0.264	0.62167	1	544	tags=76%, list=43%, signal=133%
INTRINSIC TO MEMBRANE_CEL	39	0.204265	1.15773	0.263462	0.650496	1	213	tags=28%, list=17%, signal=33%
BIOPOLYMER GLYCOSYLATION_BIO	17	0.27218	1.14624	0.289738	0.673735	1	494	tags=65%, list=39%, signal=105%
RAD51_BIND	26	0.233679	1.14446	0.312115	0.674168	1	544	tags=69%, list=43%, signal=119%
RRP5_BIND	15	0.288415	1.14399	0.302605	0.671541	1	253	tags=40%, list=20%, signal=49%
UPREGULATED GENES INDUCED BY RAPAMYCIN	15	0.281121	1.13871	0.287425	0.679704	1	191	tags=33%, list=15%, signal=39%
CTF4_BIND	24	0.23577	1.13001	0.306723	0.69597	1	397	tags=54%, list=32%, signal=78%
RPH1P_TFMOTIF	71	0.168313	1.12335	0.273109	0.707907	1	448	tags=48%, list=36%, signal=70%
GLYCOPROTEIN BIOSYNTHETIC PROCESS_BIO	17	0.27218	1.12047	0.318548	0.710705	1	494	tags=65%, list=39%, signal=105%
PROTEIN AMINO ACID GLYCOSYLATION_BIO	17	0.27218	1.11486	0.327801	0.719821	1	494	tags=65%, list=39%, signal=105%
VPS29_BIND	19	0.250734	1.11379	0.345041	0.718389	1	112	tags=21%, list=9%, signal=23%
GOLGI APPARATUS PART_CEL	24	0.232536	1.1115	0.324903	0.720054	1	721	tags=83%, list=57%, signal=191%
EFG1_TF	22	0.243961	1.11091	0.299413	0.717565	1	174	tags=32%, list=14%, signal=36%
CA21CHR1X11	36	0.207532	1.10967	0.325726	0.716587	1	258	tags=31%, list=20%, signal=37%
CUE1_BIND	16	0.275956	1.107	0.334012	0.71907	1	365	tags=50%, list=29%, signal=70%
GOLGI VESICLE TRANSPORT_BIO	26	0.228547	1.10461	0.317739	0.720829	1	742	tags=85%, list=59%, signal=202%
CLA30_UP	18	0.255322	1.09274	0.340517	0.745002	1	202	tags=33%, list=16%, signal=39%
CLA37_DN	25	0.227082	1.09266	0.319527	0.741348	1	225	tags=36%, list=18%, signal=43%
NUCLEIC ACID BINDING_MOL	62	0.168951	1.08826	0.340045	0.747977	1	359	tags=39%, list=29%, signal=51%
RAD52_BIND	38	0.198756	1.0877	0.333333	0.745477	1	566	tags=68%, list=45%, signal=121%
HYPHAL GROWTH_BIO	30	0.214725	1.08579	0.343874	0.746217	1	544	tags=63%, list=43%, signal=109%
AAH1_BIND	15	0.278291	1.08526	0.341463	0.743768	1	338	tags=47%, list=27%, signal=63%
SIGNAL TRANSDUCTION_BIO	15	0.272227	1.08355	0.35102	0.744005	1	368	tags=53%, list=29%, signal=74%
ROB1_TF	27	0.215772	1.07104	0.369658	0.77036	1	184	tags=26%, list=15%, signal=30%
VESICLE-MEDIATED TRANSPORT_BIO	44	0.18107	1.0702	0.378323	0.768502	1	1038	tags=100%, list=82%, signal=550%
FKS1_BIND	20	0.23836	1.06939	0.37451	0.766604	1	751	tags=85%, list=60%, signal=207%
CA21CHRRX8	24	0.225893	1.06824	0.38523	0.765542	1	275	tags=33%, list=22%, signal=42%
CA21CHR4X7	24	0.22491	1.06792	0.375527	0.76255	1	380	tags=46%, list=30%, signal=64%
MRC1_BIND	24	0.225612	1.06525	0.352941	0.76517	1	481	tags=63%, list=38%, signal=99%
HYPOXIA_SYNNOTT_UP	48	0.176018	1.06382	0.363071	0.764744	1	307	tags=38%, list=24%, signal=48%
CA21CHR4X8	30	0.207632	1.0596	0.374525	0.771074	1	298	tags=37%, list=24%, signal=47%
PATHOGENESIS_BIO	31	0.204144	1.05604	0.384921	0.775668	1	290	tags=35%, list=23%, signal=45%
CELL COMMUNICATION_BIO	18	0.246646	1.05294	0.385827	0.779461	1	368	tags=50%, list=29%, signal=70%
CLA37_UP	40	0.182608	1.04882	0.385246	0.785642	1	538	tags=63%, list=43%, signal=106%
BRG1_TF	70	0.157336	1.04543	0.40795	0.79	1	184	tags=20%, list=15%, signal=22%
NRG1_SGA	15	0.258461	1.04521	0.407115	0.786786	1	610	tags=73%, list=48%, signal=141%
S-G2 CLUSTER	16	0.259328	1.04306	0.377823	0.78825	1	542	tags=75%, list=43%, signal=130%
PRP6-1_SGA	15	0.259139	1.03907	0.39375	0.793887	1	162	tags=27%, list=13%, signal=30%
TEC1_BIOFILM_TF	30	0.203617	1.0342	0.401905	0.801242	1	379	tags=47%, list=30%, signal=65%
INTERSPECIES INTERACTION BETWEEN ORGANISMS_BIO	32	0.194441	1.02542	0.423625	0.817861	1	290	tags=34%, list=23%, signal=44%
SIC1_BIND	27	0.205622	1.02436	0.446502	0.816565	1	262	tags=33%, list=21%, signal=41%
SYMBIOSIS, ENCOMPASSING MUTUALISM THROUGH PARASITISM_BIO	32	0.194441	1.02414	0.427984	0.813373	1	290	tags=34%, list=23%, signal=44%
GLYCOPROTEIN METABOLIC PROCESS_BIO	18	0.24452	1.01997	0.430255	0.819623	1	770	tags=89%, list=61%, signal=226%
ATG3_BIND	17	0.24465	1.01891	0.449462	0.818479	1	566	tags=71%, list=45%, signal=127%
GOS1_BIND	16	0.247559	1.01275	0.432866	0.829268	1	671	tags=81%, list=53%, signal=172%
WBP1_BIND	17	0.230592	1.00466	0.451807	0.845051	1	494	tags=59%, list=39%, signal=96%
NUM1_SGA	23	0.21649	1.00287	0.458848	0.845402	1	780	tags=87%, list=62%, signal=224%
SLX5_BIND	32	0.190264	0.997948	0.443763	0.853209	1	483	tags=53%, list=38%, signal=84%
CA21CHR1X6	35	0.188131	0.997311	0.446028	0.850838	1	266	tags=34%, list=21%, signal=42%
CTF18_BIND	26	0.19819	0.992879	0.484849	0.857642	1	573	tags=69%, list=46%, signal=124%
DNA REPLICATION_BIO	17	0.231536	0.992549	0.467949	0.854684	1	558	tags=71%, list=44%, signal=125%
GET3_BIND	35	0.182277	0.991964	0.449524	0.852278	1	656	tags=71%, list=52%, signal=145%
CTF8_BIND	29	0.190357	0.990786	0.483264	0.851322	1	573	tags=69%, list=46%, signal=124%
EAF7_SGA	15	0.245405	0.987294	0.456612	0.856007	1	634	tags=80%, list=50%, signal=159%
ION TRANSPORT_BIO	21	0.217895	0.982864	0.474104	0.862702	1	190	tags=29%, list=15%, signal=33%
CDC5_7H_UP	81	0.137477	0.981927	0.487448	0.861206	1	330	tags=33%, list=26%, signal=42%
PHO80_BIND	33	0.183772	0.980988	0.480545	0.859678	1	365	tags=42%, list=29%, signal=58%
SSE1_BIND	25	0.202105	0.979247	0.475891	0.86022	1	600	tags=68%, list=48%, signal=127%
SEM1_BIND	34	0.187836	0.976455	0.47166	0.862748	1	485	tags=59%, list=39%, signal=93%
ASF1_BIND	26	0.20289	0.976265	0.468127	0.859454	1	487	tags=58%, list=39%, signal=92%
ERV14_BIND	27	0.194879	0.976227	0.494208	0.855924	1	671	tags=74%, list=53%, signal=155%
RPN4_BIND	42	0.165887	0.974046	0.507187	0.857495	1	917	tags=93%, list=73%, signal=330%
XS_UP	37	0.174822	0.97377	0.498008	0.854556	1	334	tags=38%, list=27%, signal=50%
PHOSPHOTRANSFERASE ACTIVITY, ALCOHOL GROUP AS ACCEPTOR_MOL	20	0.217106	0.973367	0.50303	0.85193	1	256	tags=30%, list=20%, signal=37%
CA21CHR1X16	19	0.220731	0.969807	0.468992	0.85661	1	128	tags=21%, list=10%, signal=23%
CELL CYCLE PHASE_BIO	31	0.183299	0.965133	0.503119	0.863979	1	223	tags=29%, list=18%, signal=34%
GSG1_BIND	33	0.181639	0.963671	0.478992	0.863748	1	671	tags=76%, list=53%, signal=158%
CDC53_DN	40	0.167625	0.959208	0.496881	0.870499	1	179	tags=23%, list=14%, signal=25%
DNA REPAIR_BIO	24	0.199354	0.951919	0.520154	0.883614	1	558	tags=67%, list=44%, signal=117%
CA21CHR1X8	20	0.213892	0.951699	0.508911	0.880519	1	300	tags=40%, list=24%, signal=52%
ENDOPLASMIC RETICULUM PART_CEL	26	0.19631	0.948377	0.531373	0.884483	1	571	tags=69%, list=45%, signal=124%
CAF4_SGA	17	0.222958	0.94671	0.539394	0.884737	1	179	tags=29%, list=14%, signal=34%
BUD27_BIND	15	0.238603	0.943525	0.513238	0.888447	1	427	tags=53%, list=34%, signal=80%
YAK1_H_DN	73	0.139511	0.941931	0.544732	0.888472	1	313	tags=33%, list=25%, signal=41%
ESTABLISHMENT OF CELLULAR LOCALIZATION_BIO	65	0.142716	0.939619	0.561475	0.890182	1	885	tags=88%, list=70%, signal=280%
BEM1_SGA	45	0.161008	0.939447	0.509434	0.886992	1	223	tags=27%, list=18%, signal=31%
CA21CHR2X9	20	0.214216	0.938655	0.512048	0.885173	1	241	tags=30%, list=19%, signal=37%
HMO1_BIND	29	0.185054	0.927205	0.542373	0.907265	1	483	tags=59%, list=38%, signal=93%
PBS2_BIND	16	0.226274	0.925736	0.52449	0.907005	1	773	tags=88%, list=61%, signal=224%
RGP1_BIND	37	0.168431	0.924759	0.569647	0.905584	1	909	tags=92%, list=72%, signal=321%
BLM10_BIND	18	0.210344	0.915465	0.548057	0.923074	1	571	tags=72%, list=45%, signal=130%
ALG8_BIND	17	0.22026	0.914547	0.556237	0.921572	1	521	tags=65%, list=41%, signal=109%
KINASE ACTIVITY_MOL	27	0.181819	0.912566	0.570526	0.922398	1	47	tags=11%, list=4%, signal=11%
CDC60-TS_SGA	15	0.231844	0.910129	0.552361	0.924339	1	852	tags=93%, list=68%, signal=285%
CA21CHR5X4	20	0.205409	0.908345	0.57515	0.924889	1	78	tags=15%, list=6%, signal=16%
BCR1_TF	67	0.13671	0.906671	0.588957	0.924961	1	116	tags=15%, list=9%, signal=16%
MACROMOLECULE LOCALIZATION_BIO	35	0.165285	0.905591	0.57551	0.92394	1	552	tags=60%, list=44%, signal=104%
RPO41_BIND	17	0.21526	0.899512	0.550308	0.933428	1	147	tags=24%, list=12%, signal=26%
SLA1_BIND	24	0.184877	0.89359	0.591182	0.942986	1	55	tags=13%, list=4%, signal=13%
DNA BINDING_MOL	40	0.159845	0.892082	0.568228	0.942618	1	436	tags=48%, list=35%, signal=70%
ARL1_BIND	23	0.191279	0.891299	0.579498	0.940797	1	671	tags=74%, list=53%, signal=155%
CA21CHR3X8	24	0.190245	0.89044	0.612903	0.939114	1	182	tags=25%, list=14%, signal=29%
CA21CHR7X5	19	0.205376	0.882941	0.59375	0.951517	1	264	tags=32%, list=21%, signal=39%
GOT1_BIND	16	0.219951	0.882305	0.613726	0.949342	1	573	tags=69%, list=46%, signal=125%
BIOPOLYMER MODIFICATION_BIO	71	0.13085	0.88134	0.605058	0.947935	1	296	tags=30%, list=24%, signal=36%
RNA1-S116F_SGA	24	0.188005	0.878226	0.622363	0.951104	1	671	tags=75%, list=53%, signal=158%
OCA2_SGA	20	0.197022	0.866397	0.644401	0.972666	1	928	tags=95%, list=74%, signal=356%
TOM70_SGA	34	0.159901	0.86627	0.646465	0.969391	1	378	tags=44%, list=30%, signal=61%
ALG6_BIND	21	0.190256	0.864855	0.624254	0.968824	1	166	tags=24%, list=13%, signal=27%
STE50_BIND	27	0.175286	0.862656	0.599156	0.96983	1	483	tags=52%, list=38%, signal=82%
RAD1_BIND	18	0.204164	0.862424	0.594262	0.966857	1	598	tags=78%, list=47%, signal=146%
YPT7_BIND	19	0.194732	0.859006	0.640082	0.970352	1	742	tags=84%, list=59%, signal=202%
COG7_BIND	23	0.179847	0.856589	0.637317	0.971943	1	885	tags=91%, list=70%, signal=302%
CA21CHR1X7	29	0.169902	0.851801	0.645228	0.978529	1	224	tags=28%, list=18%, signal=33%
RESPONSE TO STIMULUS_BIO	84	0.117923	0.843517	0.691332	0.991747	1	296	tags=30%, list=24%, signal=36%
UBI4_BIND	34	0.154286	0.838421	0.687885	0.998373	1	1069	tags=100%, list=85%, signal=645%
KAR3_BIND	26	0.171779	0.837581	0.650424	0.996584	1	566	tags=65%, list=45%, signal=116%
CUP2P_TFMOTIF	16	0.206324	0.837324	0.672515	0.993599	1	165	tags=25%, list=13%, signal=28%
CA21CHR2X2	18	0.194393	0.835001	0.64916	0.994536	1	326	tags=44%, list=26%, signal=59%
LAS21_BIND	22	0.18319	0.834006	0.681298	0.992953	1	494	tags=55%, list=39%, signal=88%
MEMBRANE FRACTION_CEL	15	0.21185	0.831654	0.707602	0.994056	1	889	tags=93%, list=71%, signal=314%
SAC1_BIND	52	0.130534	0.827063	0.683794	0.999462	1	260	tags=25%, list=21%, signal=30%
POL32_BIND	26	0.171836	0.825138	0.685654	0.999651	1	744	tags=81%, list=59%, signal=193%
BEM1_BIND	36	0.145715	0.823528	0.69697	0.999314	1	408	tags=42%, list=32%, signal=60%
BST1_BIND	17	0.199821	0.822673	0.675147	0.997644	1	671	tags=76%, list=53%, signal=162%
RESPONSE TO DNA DAMAGE STIMULUS_BIO	25	0.170473	0.822554	0.6893	0.994482	1	558	tags=64%, list=44%, signal=113%
SWC5_BIND	45	0.138855	0.821605	0.709419	0.992924	1	624	tags=64%, list=50%, signal=123%
RAS2_BIND	18	0.190675	0.820265	0.660819	0.99213	1	242	tags=28%, list=19%, signal=34%
SEC27_BIND	21	0.179273	0.80875	0.703557	1	1	573	tags=67%, list=46%, signal=120%
CA21CHR4X4	27	0.163206	0.807823	0.6778	1	1	563	tags=67%, list=45%, signal=118%
ATG17_BIND	16	0.196747	0.806524	0.704312	1	1	452	tags=56%, list=36%, signal=87%
VPS21_BIND	24	0.171583	0.803935	0.690335	1	1	159	tags=21%, list=13%, signal=23%
VIP1_BIND	18	0.18314	0.802307	0.706693	1	1	260	tags=33%, list=21%, signal=41%
NPL3_BIND	18	0.190335	0.80093	0.694779	1	1	929	tags=94%, list=74%, signal=355%
AHR1_TF	25	0.162507	0.800704	0.719368	1	1	328	tags=36%, list=26%, signal=48%
CA21CHR5X5	19	0.184605	0.799218	0.701863	1	1	225	tags=26%, list=18%, signal=32%
GSM1P_TFMOTIF	79	0.11373	0.794638	0.747899	1	1	438	tags=39%, list=35%, signal=56%
CA21CHR5X3	16	0.195989	0.793479	0.709056	1	1	465	tags=56%, list=37%, signal=88%
REI1_BIND	17	0.182587	0.793271	0.737271	1	1	223	tags=29%, list=18%, signal=35%
BCK1_BIND	21	0.171964	0.78887	0.724206	1	1	285	tags=33%, list=23%, signal=42%
HHF1_BIND	27	0.156582	0.784232	0.764228	1	1	573	tags=63%, list=46%, signal=113%
IKI3_BIND	26	0.15929	0.784229	0.73374	1	1	148	tags=19%, list=12%, signal=21%
KRE33_BIND	20	0.176739	0.783948	0.715447	1	1	253	tags=30%, list=20%, signal=37%
EOS1_BIND	19	0.172869	0.780413	0.740234	1	1	417	tags=47%, list=33%, signal=70%
CA21CHR2X3	25	0.159752	0.777337	0.714286	1	1	429	tags=48%, list=34%, signal=71%
CSF1_BIND	24	0.159831	0.773479	0.775758	1	1	350	tags=38%, list=28%, signal=51%
CDC20-3_SGA	25	0.161864	0.77249	0.746964	1	1	172	tags=24%, list=14%, signal=27%
ACE2-CHIP	74	0.114014	0.772339	0.779626	1	1	250	tags=24%, list=20%, signal=29%
INP53_BIND	15	0.190046	0.771137	0.722555	1	1	58	tags=13%, list=5%, signal=14%
FILAMENTOUS GROWTH_BIO	67	0.11472	0.770307	0.780303	1	1	555	tags=57%, list=44%, signal=96%
TRANSCRIPTION FACTOR ACTIVITY_MOL	31	0.154315	0.768892	0.740816	1	1	359	tags=39%, list=29%, signal=53%
GAS1_BIND	32	0.145582	0.768654	0.729124	1	1	885	tags=88%, list=70%, signal=287%
RESPONSE TO ENDOGENOUS STIMULUS_BIO	28	0.153613	0.767663	0.76383	1	1	523	tags=57%, list=42%, signal=96%
HU_6H_UP	58	0.118297	0.765074	0.785276	1	1	445	tags=45%, list=35%, signal=66%
SSH1_BIND	16	0.182512	0.7635	0.725702	1	1	182	tags=25%, list=14%, signal=29%
UBC7_BIND	18	0.179778	0.761411	0.756198	1	1	511	tags=56%, list=41%, signal=92%
VPS9_BIND	20	0.173755	0.761382	0.753425	1	1	721	tags=80%, list=57%, signal=184%
CA21CHR2X6	29	0.147374	0.758544	0.780392	1	1	281	tags=31%, list=22%, signal=39%
ICE2_BIND	37	0.13655	0.755087	0.792757	1	1	671	tags=70%, list=53%, signal=146%
TRANSFERASE ACTIVITY, TRANSFERRING HEXOSYL GROUPS_MOL	18	0.176534	0.754009	0.77551	1	1	947	tags=94%, list=75%, signal=376%
ESA1-L254P_SGA	19	0.173973	0.750396	0.781971	1	1	866	tags=89%, list=69%, signal=282%
UBC4_BIND	27	0.152943	0.746655	0.790123	1	1	232	tags=26%, list=18%, signal=31%
BRE1_SGA	29	0.148109	0.746528	0.793037	1	1	746	tags=79%, list=59%, signal=190%
SOLUBLE FRACTION_CEL	16	0.179949	0.742259	0.77551	1	1	257	tags=31%, list=20%, signal=39%
CCZ1_BIND	16	0.179373	0.74123	0.765957	1	1	140	tags=19%, list=11%, signal=21%
MACROMOLECULAR COMPLEX ASSEMBLY_BIO	44	0.122842	0.736928	0.817048	1	1	879	tags=86%, list=70%, signal=276%
ELG1_BIND	15	0.185972	0.736298	0.764344	1	1	573	tags=67%, list=46%, signal=121%
PGA3_BIND	15	0.185887	0.734119	0.789796	1	1	812	tags=87%, list=64%, signal=241%
INTRACELLULAR TRANSPORT_BIO	57	0.118661	0.733253	0.806841	1	1	885	tags=86%, list=70%, signal=276%
RNA POLYMERASE II TRANSCRIPTION FACTOR ACTIVITY_MOL	18	0.167647	0.725838	0.7751	1	1	175	tags=22%, list=14%, signal=25%
CELL CYCLE PROCESS_BIO	41	0.128438	0.724955	0.8	1	1	242	tags=24%, list=19%, signal=29%
CA21CHR2X11	26	0.147392	0.723817	0.791322	1	1	237	tags=27%, list=19%, signal=32%
CELLULAR LOCALIZATION_BIO	69	0.109237	0.723173	0.846465	1	1	885	tags=86%, list=70%, signal=272%
PHOSPHORUS METABOLIC PROCESS_BIO	17	0.171283	0.715608	0.829918	1	1	256	tags=29%, list=20%, signal=36%
SSA1_BIND	32	0.13187	0.711789	0.850598	1	1	797	tags=81%, list=63%, signal=216%
MSN5_BIND	18	0.169398	0.710938	0.80202	1	1	253	tags=28%, list=20%, signal=34%
CA21CHR5X2	15	0.178625	0.710816	0.824299	1	1	314	tags=40%, list=25%, signal=53%
CCZ1_SGA	25	0.147505	0.708645	0.827789	1	1	161	tags=20%, list=13%, signal=22%
CELL CYCLE_BIO	44	0.122402	0.708287	0.819672	1	1	483	tags=50%, list=38%, signal=78%
LCB5_SGA	20	0.157862	0.704533	0.849206	1	1	167	tags=20%, list=13%, signal=23%
ARL3_BIND	18	0.16781	0.704362	0.820988	1	1	849	tags=89%, list=67%, signal=269%
CA21CHR2X5	28	0.134465	0.701169	0.847826	1	1	161	tags=18%, list=13%, signal=20%
PHOSPHATE METABOLIC PROCESS_BIO	17	0.171283	0.698757	0.84	1	1	256	tags=29%, list=20%, signal=36%
SEC28_BIND	32	0.132041	0.694577	0.848126	1	1	166	tags=19%, list=13%, signal=21%
CA21CHR1X4	32	0.132358	0.693991	0.825651	1	1	178	tags=19%, list=14%, signal=21%
PHO86_BIND	16	0.167773	0.6936	0.831301	1	1	691	tags=75%, list=55%, signal=164%
COG8_BIND	31	0.129506	0.68348	0.843096	1	1	1037	tags=97%, list=82%, signal=535%
SWR1_SGA	15	0.173625	0.681494	0.84413	1	1	96	tags=13%, list=8%, signal=14%
ESTABLISHMENT OF PROTEIN LOCALIZATION_BIO	30	0.13095	0.681264	0.840156	1	1	552	tags=57%, list=44%, signal=99%
UME6_BIND	31	0.130264	0.681052	0.869307	1	1	483	tags=48%, list=38%, signal=77%
ENDOMEMBRANE SYSTEM_CEL	42	0.118139	0.678935	0.850895	1	1	581	tags=62%, list=46%, signal=111%
STE24_BIND	26	0.134372	0.678198	0.840319	1	1	521	tags=54%, list=41%, signal=90%
MITOTIC CELL CYCLE_BIO	21	0.1505	0.677227	0.868885	1	1	483	tags=52%, list=38%, signal=84%
SEC66_BIND	47	0.1102	0.676662	0.87526	1	1	502	tags=51%, list=40%, signal=82%
STB5_BIND	23	0.140438	0.675778	0.869048	1	1	256	tags=26%, list=20%, signal=32%
T1 PROPIONIC-VS-CONTROL_DN	93	0.0921209	0.674868	0.897177	1	1	207	tags=17%, list=16%, signal=19%
FKS1_SGA	17	0.162304	0.673908	0.87247	1	1	721	tags=76%, list=57%, signal=177%
COG5_BIND	27	0.135169	0.669549	0.895196	1	1	1019	tags=96%, list=81%, signal=494%
RIM101_NRG1_UP	33	0.126582	0.669178	0.892632	1	1	266	tags=27%, list=21%, signal=34%
PER1_BIND	20	0.149637	0.667693	0.861057	1	1	808	tags=85%, list=64%, signal=234%
OS_UP	40	0.11573	0.666747	0.881391	1	1	443	tags=43%, list=35%, signal=63%
SMI1_BIND	21	0.149597	0.665072	0.879346	1	1	85	tags=14%, list=7%, signal=15%
ELP3_BIND	25	0.13649	0.664847	0.878407	0.998956	1	279	tags=28%, list=22%, signal=35%
SUM1_BIND	24	0.140081	0.663485	0.856016	0.997801	1	1085	tags=100%, list=86%, signal=710%
HOM3_SGA	21	0.145324	0.662704	0.850598	0.995952	1	429	tags=48%, list=34%, signal=71%
ADA2_SGA	26	0.137549	0.661329	0.886051	0.99476	1	611	tags=65%, list=49%, signal=124%
INO4_BIND	16	0.164813	0.659425	0.871965	0.994176	1	859	tags=88%, list=68%, signal=272%
CELL FRACTION_CEL	30	0.129535	0.657508	0.91023	0.993641	1	298	tags=30%, list=24%, signal=38%
PROTEIN LOCALIZATION_BIO	32	0.123584	0.655753	0.883534	0.992779	1	552	tags=56%, list=44%, signal=98%
TRANSCRIPTION FROM RNA POLYMERASE II PROMOTER_BIO	27	0.128136	0.655488	0.902083	0.990435	1	116	tags=15%, list=9%, signal=16%
GROWTH_BIO	68	0.100792	0.655394	0.903158	0.987917	1	555	tags=56%, list=44%, signal=95%
ADA2_TF	37	0.117217	0.653636	0.90297	0.987188	1	311	tags=30%, list=25%, signal=38%
CA21CHR3X6	26	0.132651	0.652401	0.879346	0.985772	1	149	tags=19%, list=12%, signal=21%
GET3_SGA	19	0.150888	0.644791	0.89662	0.990885	1	34	tags=11%, list=3%, signal=11%
MGR1_SGA	23	0.13638	0.644712	0.878914	0.988367	1	922	tags=91%, list=73%, signal=335%
ALT1_BIND	19	0.145146	0.635424	0.897384	0.994539	1	279	tags=32%, list=22%, signal=40%
FPS1_SGA	25	0.135211	0.634023	0.904483	0.993295	1	1015	tags=96%, list=81%, signal=486%
PDE2_BIND	15	0.157747	0.627904	0.904459	0.9963	1	645	tags=73%, list=51%, signal=149%
CTI6_BIND	16	0.155745	0.624421	0.904382	0.996842	1	399	tags=44%, list=32%, signal=63%
TPS1_BIND	22	0.139046	0.619446	0.931507	0.998589	1	1086	tags=100%, list=86%, signal=715%
CA21CHR1X14	18	0.14268	0.617304	0.927602	0.997875	1	71	tags=11%, list=6%, signal=12%
ILM1_BIND	20	0.139629	0.609263	0.91	1	1	1085	tags=100%, list=86%, signal=712%
PROTEIN COMPLEX ASSEMBLY_BIO	17	0.147245	0.608771	0.907757	0.999696	1	474	tags=53%, list=38%, signal=84%
RPA34_BIND	21	0.129241	0.595475	0.91841	1	1	1098	tags=100%, list=87%, signal=769%
SLX9_BIND	19	0.132924	0.587515	0.924242	1	1	909	tags=89%, list=72%, signal=317%
SSL1-T242I_SGA	17	0.138717	0.587443	0.93014	1	1	6	tags=6%, list=0%, signal=6%
HOS2_SGA	29	0.11438	0.586064	0.931313	1	1	990	tags=93%, list=79%, signal=426%
RESPONSE TO STRESS_BIO	58	0.0898133	0.574195	0.942478	1	1	523	tags=50%, list=42%, signal=82%
POB3-L78R_SGA	38	0.102629	0.572015	0.94926	1	1	149	tags=16%, list=12%, signal=17%
SEC22_BIND	43	0.0991459	0.561154	0.952381	1	1	1093	tags=98%, list=87%, signal=715%
HDA1_BIND	17	0.13285	0.559299	0.948052	1	1	1093	tags=100%, list=87%, signal=748%
NUP188_BIND	17	0.131559	0.555495	0.947368	1	1	859	tags=88%, list=68%, signal=274%
TRANSFERASE ACTIVITY_MOL	87	0.0752596	0.553831	0.976096	1	1	266	tags=22%, list=21%, signal=26%
PROTEIN TRANSPORT_BIO	25	0.112571	0.545255	0.968815	1	1	343	tags=32%, list=27%, signal=43%
VPS30_BIND	18	0.127056	0.541331	0.977733	1	1	573	tags=61%, list=46%, signal=111%
REGULATION OF TRANSCRIPTION FROM RNA POLYMERASE II PROMOTER_BIO	17	0.128109	0.537444	0.970179	1	1	352	tags=35%, list=28%, signal=48%
MGA2_BIND	24	0.113164	0.535106	0.966601	1	1	580	tags=58%, list=46%, signal=106%
SWA2_BIND	19	0.122393	0.534372	0.963249	1	1	259	tags=26%, list=21%, signal=33%
PROTEIN-DNA COMPLEX ASSEMBLY_BIO	15	0.131567	0.533133	0.94929	1	1	870	tags=87%, list=69%, signal=277%
SCS7_BIND	44	0.0905654	0.532345	0.990138	1	1	1015	tags=93%, list=81%, signal=464%
POST-TRANSLATIONAL PROTEIN MODIFICATION_BIO	37	0.0948331	0.528352	0.971429	1	1	560	tags=54%, list=44%, signal=94%
PROTEIN MODIFICATION PROCESS_BIO	63	0.0780707	0.518802	0.987976	1	1	542	tags=51%, list=43%, signal=85%
VPS51_BIND	31	0.0992663	0.517535	0.978947	1	1	166	tags=16%, list=13%, signal=18%
SPT3_SGA	22	0.109559	0.499434	0.973029	1	1	331	tags=32%, list=26%, signal=42%
MTR4-1_SGA	22	0.108015	0.495336	0.98419	1	1	6	tags=5%, list=0%, signal=4%
CELLULAR COMPONENT ASSEMBLY_BIO	55	0.0778504	0.488417	0.980519	1	1	887	tags=84%, list=70%, signal=271%
MBP1P_TFMOTIF	32	0.0925009	0.488115	0.989879	1	1	293	tags=28%, list=23%, signal=36%
PROTEIN TARGETING_BIO	24	0.102046	0.485333	0.974104	1	1	112	tags=13%, list=9%, signal=13%
INTRACELLULAR PROTEIN TRANSPORT_BIO	24	0.102046	0.485194	0.982	0.999687	1	112	tags=13%, list=9%, signal=13%
SWC3_BIND	34	0.0880929	0.480775	0.994071	0.9985	1	260	tags=24%, list=21%, signal=29%
ERI1_SGA	17	0.111988	0.467771	1	0.999192	1	632	tags=65%, list=50%, signal=128%
DAP2_SGA	19	0.103157	0.452012	0.994106	0.999699	1	854	tags=84%, list=68%, signal=258%
MRC1_SGA	17	0.107193	0.444334	0.995893	0.998542	1	162	tags=18%, list=13%, signal=20%
RPS8A_BIND	24	0.0888731	0.413009	0.99789	0.999663	1	140	tags=13%, list=11%, signal=14%
SYS1_BIND	26	0.0821259	0.396267	0.993865	0.998372	1	58	tags=8%, list=5%, signal=8%

## Sheet: GSEA sth1 DIA-MS neg
NAME	SIZE	ES	NES	NOM p-val	FDR q-val	FWER p-val	RANK AT MAX	LEADING EDGE
T4 BUTYRIC-VS-CONTROL_DN	346	-0.412546	-2.02752	0	0.237515	0.214	487	tags=62%, list=46%, signal=78%
T4 PROPIONIC-VS-CONTROL_DN	444	-0.397137	-1.98097	0	0.226246	0.359	487	tags=59%, list=46%, signal=64%
ORGANELLAR LARGE RIBOSOMAL SUBUNIT_CEL	19	-0.650586	-1.96867	0	0.187095	0.426	270	tags=74%, list=25%, signal=97%
MITOCHONDRIAL LARGE RIBOSOMAL SUBUNIT_CEL	19	-0.650586	-1.94569	0	0.190222	0.522	270	tags=74%, list=25%, signal=97%
ORGANELLAR RIBOSOME_CEL	35	-0.53623	-1.91004	0	0.247116	0.696	425	tags=80%, list=40%, signal=129%
MITOCHONDRIAL RIBOSOME_CEL	35	-0.53623	-1.89112	0.00149925	0.262281	0.784	425	tags=80%, list=40%, signal=129%
GSH1_SGA	24	-0.580755	-1.88996	0.00151286	0.229676	0.788	191	tags=54%, list=18%, signal=65%
MAE1_SGA	15	-0.659216	-1.88382	0.00164204	0.215603	0.814	151	tags=47%, list=14%, signal=54%
UPF3_BIND	18	-0.622837	-1.84706	0.00475436	0.289794	0.922	147	tags=33%, list=14%, signal=38%
MRNA METABOLIC PROCESS_BIO	24	-0.569204	-1.84453	0	0.267676	0.924	286	tags=58%, list=27%, signal=78%
RAD4_SGA	24	-0.573775	-1.842	0.00300752	0.250132	0.932	26	tags=17%, list=2%, signal=17%
HU_2H_DN	29	-0.546233	-1.83029	0	0.260952	0.949	98	tags=21%, list=9%, signal=22%
INO2_BIND	21	-0.57951	-1.82588	0	0.252584	0.953	325	tags=71%, list=31%, signal=101%
RIBONUCLEOPROTEIN COMPLEX_CEL	103	-0.41044	-1.79831	0.00132802	0.319403	0.984	509	tags=67%, list=48%, signal=116%
MITOCHONDRIAL MATRIX_CEL	57	-0.455752	-1.79459	0.00542005	0.310825	0.985	425	tags=65%, list=40%, signal=102%
LARGE RIBOSOMAL SUBUNIT_CEL	32	-0.528738	-1.78812	0.00151515	0.313011	0.99	276	tags=50%, list=26%, signal=66%
MITOCHONDRIAL LUMEN_CEL	57	-0.455752	-1.76092	0.00140252	0.3908	0.997	425	tags=65%, list=40%, signal=102%
RIBOSOMAL LARGE SUBUNIT BIOGENESIS AND ASSEMBLY_BIO	15	-0.623843	-1.74839	0.00475436	0.420397	1	196	tags=47%, list=18%, signal=56%
PROTEIN-RNA COMPLEX ASSEMBLY_BIO	31	-0.498152	-1.74049	0.00149701	0.432515	1	196	tags=29%, list=18%, signal=35%
HS_DN	81	-0.419934	-1.7341	0.00137552	0.436797	1	405	tags=59%, list=38%, signal=88%
MRP7_BIND	17	-0.588823	-1.73026	0.0110236	0.432162	1	228	tags=59%, list=21%, signal=74%
SIN3_SGA	41	-0.480005	-1.72639	0.00443787	0.426567	1	103	tags=24%, list=10%, signal=26%
DEG1_SGA	52	-0.449689	-1.72594	0.00280112	0.409868	1	149	tags=27%, list=14%, signal=30%
MDL1_SGA	21	-0.553694	-1.71924	0.0108025	0.419291	1	153	tags=38%, list=14%, signal=44%
VID28_SGA	22	-0.544766	-1.71725	0.0111288	0.410272	1	151	tags=36%, list=14%, signal=42%
XS_DN	83	-0.413655	-1.7133	0.00263505	0.4086	1	470	tags=60%, list=44%, signal=100%
TOR2-29_SGA	19	-0.55802	-1.71292	0.0127389	0.394813	1	96	tags=26%, list=9%, signal=28%
LRP1_BIND	41	-0.469476	-1.70113	0.00290698	0.4234	1	258	tags=41%, list=24%, signal=53%
ROM2_BIND	24	-0.537222	-1.70106	0.0140625	0.409155	1	202	tags=38%, list=19%, signal=45%
NMD2_BIND	22	-0.539569	-1.68528	0.015015	0.456273	1	147	tags=27%, list=14%, signal=31%
NUP188_SGA	31	-0.491249	-1.67487	0.0134128	0.483319	1	161	tags=32%, list=15%, signal=37%
CDC48-2_SGA	48	-0.445202	-1.66427	0.00578035	0.515022	1	143	tags=23%, list=13%, signal=25%
ORGANELLE LUMEN_CEL	136	-0.368375	-1.66231	0	0.507799	1	448	tags=58%, list=42%, signal=88%
MEMBRANE-ENCLOSED LUMEN_CEL	136	-0.368375	-1.65846	0.00375469	0.508781	1	448	tags=58%, list=42%, signal=88%
RAD4_BIND	18	-0.555441	-1.65785	0.010989	0.496547	1	28	tags=22%, list=3%, signal=22%
MSS1_SGA	45	-0.451472	-1.6571	0.00723589	0.485547	1	206	tags=31%, list=19%, signal=37%
T4 LACTIC-VS-CONTROL_DN	272	-0.341363	-1.64853	0	0.507006	1	409	tags=51%, list=38%, signal=62%
YEL057C_SGA	28	-0.49457	-1.64729	0.0136364	0.498905	1	143	tags=25%, list=13%, signal=28%
RNA PROCESSING_BIO	65	-0.416838	-1.64355	0.00969529	0.500761	1	391	tags=54%, list=37%, signal=80%
POP4_DAMP_SGA	37	-0.459417	-1.6376	0.0125	0.513917	1	232	tags=41%, list=22%, signal=50%
UTR2_SGA	19	-0.541931	-1.62962	0.0141066	0.534807	1	165	tags=32%, list=16%, signal=37%
RIBONUCLEOPROTEIN COMPLEX BIOGENESIS AND ASSEMBLY_BIO	83	-0.396466	-1.6267	0.00412655	0.534822	1	393	tags=48%, list=37%, signal=70%
GDH2_SGA	29	-0.481652	-1.62619	0.0152207	0.524576	1	129	tags=17%, list=12%, signal=19%
PAU10_SGA	20	-0.522012	-1.62442	0.0150602	0.519811	1	357	tags=60%, list=34%, signal=89%
RIBOSOME_CEL	75	-0.394025	-1.62144	0.00402685	0.520952	1	496	tags=63%, list=47%, signal=109%
RIBOSOME BIOGENESIS AND ASSEMBLY_BIO	69	-0.398522	-1.615	0.00407056	0.53632	1	467	tags=61%, list=44%, signal=102%
THG1_DAMP_SGA	22	-0.517194	-1.61189	0.0139752	0.53808	1	42	tags=23%, list=4%, signal=23%
IZH1_SGA	22	-0.511831	-1.6069	0.0245399	0.547808	1	344	tags=59%, list=32%, signal=86%
ATC1_SGA	15	-0.571637	-1.60669	0.0187793	0.537664	1	244	tags=47%, list=23%, signal=60%
SRC1_BIND	22	-0.511067	-1.60292	0.0291859	0.543327	1	132	tags=32%, list=12%, signal=36%
DIS3_BIND	15	-0.558916	-1.59983	0.041868	0.545485	1	386	tags=60%, list=36%, signal=93%
TRNA METABOLIC PROCESS_BIO	17	-0.563436	-1.5995	0.0345369	0.536471	1	311	tags=53%, list=29%, signal=74%
NUCLEOLUS_CEL	47	-0.428622	-1.59433	0.0170213	0.547986	1	467	tags=66%, list=44%, signal=112%
SWI4SWI6_DN	86	-0.374948	-1.59282	0.0105541	0.543972	1	470	tags=63%, list=44%, signal=103%
TRANSLATION_BIO	94	-0.370464	-1.59257	0.00131926	0.535041	1	539	tags=65%, list=51%, signal=120%
SRP1_BIND	32	-0.46643	-1.59219	0.0254491	0.526744	1	330	tags=44%, list=31%, signal=62%
OS_DN	80	-0.381188	-1.58349	0.00541272	0.55291	1	362	tags=49%, list=34%, signal=68%
UBP6_SGA	37	-0.439617	-1.58195	0.0242857	0.549474	1	223	tags=35%, list=21%, signal=43%
ORGANELLAR SMALL RIBOSOMAL SUBUNIT_CEL	15	-0.547246	-1.579	0.0439932	0.552762	1	485	tags=93%, list=46%, signal=169%
RPS21B_BIND	20	-0.516834	-1.56865	0.0422535	0.586537	1	133	tags=30%, list=13%, signal=34%
MITOCHONDRIAL SMALL RIBOSOMAL SUBUNIT_CEL	15	-0.547246	-1.56309	0.0422078	0.600684	1	485	tags=93%, list=46%, signal=169%
RPO26_BIND	20	-0.500962	-1.56279	0.0404984	0.592336	1	375	tags=60%, list=35%, signal=91%
RPB5_BIND	16	-0.538802	-1.56122	0.0401284	0.589398	1	375	tags=69%, list=35%, signal=105%
NUCLEOLAR PART_CEL	22	-0.497674	-1.55637	0.0438871	0.60214	1	405	tags=73%, list=38%, signal=115%
MLP1_SGA	17	-0.52642	-1.55029	0.0267559	0.620302	1	143	tags=35%, list=13%, signal=40%
RLP7_BIND	25	-0.477786	-1.54604	0.0406015	0.630865	1	463	tags=64%, list=44%, signal=111%
NBP2_BIND	17	-0.520925	-1.54372	0.0441177	0.631106	1	214	tags=41%, list=20%, signal=51%
BUL1_SGA	22	-0.488558	-1.54295	0.0400616	0.625405	1	61	tags=18%, list=6%, signal=19%
LSM1_SGA	46	-0.416457	-1.53901	0.0227596	0.633698	1	252	tags=35%, list=24%, signal=44%
DIA2_SGA	22	-0.490961	-1.53827	0.0449102	0.627984	1	141	tags=36%, list=13%, signal=41%
CA21CHR5X4	18	-0.506498	-1.53618	0.0325581	0.628436	1	207	tags=39%, list=19%, signal=47%
ERG8-1_SGA	16	-0.529787	-1.5339	0.0458136	0.62985	1	30	tags=19%, list=3%, signal=19%
TRANSFERASE ACTIVITY, TRANSFERRING GLYCOSYL GROUPS_MOL	16	-0.532599	-1.53334	0.0424528	0.623478	1	157	tags=38%, list=15%, signal=43%
ARP2-14_SGA	17	-0.525006	-1.53193	0.0490046	0.621237	1	141	tags=29%, list=13%, signal=33%
RIBONUCLEASE ACTIVITY_MOL	18	-0.507533	-1.53191	0.0476923	0.613009	1	386	tags=67%, list=36%, signal=103%
STRUCTURAL CONSTITUENT OF RIBOSOME_MOL	62	-0.386384	-1.53012	0.0266106	0.612832	1	505	tags=66%, list=48%, signal=119%
PCK1_SGA	15	-0.537068	-1.52569	0.0594855	0.624524	1	113	tags=33%, list=11%, signal=37%
RIBOSOMAL SUBUNIT ASSEMBLY_BIO	15	-0.526943	-1.52277	0.050571	0.628856	1	196	tags=33%, list=18%, signal=40%
CLA37_DN	28	-0.454038	-1.51852	0.0348485	0.64052	1	187	tags=36%, list=18%, signal=42%
RNA CATABOLIC PROCESS_BIO	15	-0.532583	-1.51749	0.0405616	0.637236	1	327	tags=60%, list=31%, signal=85%
NO_DN	27	-0.455868	-1.51721	0.0371517	0.630608	1	419	tags=59%, list=39%, signal=95%
MRC1_SGA	16	-0.52361	-1.51473	0.0507132	0.633582	1	96	tags=25%, list=9%, signal=27%
MRNA CATABOLIC PROCESS_BIO	15	-0.532583	-1.51219	0.0479233	0.636849	1	327	tags=60%, list=31%, signal=85%
TAP42-11_SGA	21	-0.481311	-1.50096	0.0611285	0.678215	1	165	tags=29%, list=16%, signal=33%
KIP3_SGA	21	-0.482178	-1.50084	0.05	0.670699	1	208	tags=48%, list=20%, signal=58%
JID1_SGA	30	-0.442054	-1.49859	0.0544919	0.673635	1	198	tags=33%, list=19%, signal=40%
UTP20_BIND	21	-0.479343	-1.49666	0.0394945	0.674716	1	484	tags=71%, list=46%, signal=129%
MRPL17_BIND	15	-0.534393	-1.4963	0.0503145	0.668542	1	496	tags=93%, list=47%, signal=173%
HXT2_SGA	15	-0.523735	-1.49286	0.0672414	0.675273	1	18	tags=13%, list=2%, signal=13%
SRC1_SGA	17	-0.50701	-1.49199	0.0608424	0.671876	1	82	tags=24%, list=8%, signal=25%
RPB8_BIND	16	-0.521773	-1.49148	0.0592824	0.666697	1	375	tags=69%, list=35%, signal=105%
MED31_DN	18	-0.505779	-1.49059	0.0547504	0.663434	1	159	tags=39%, list=15%, signal=45%
PEX12_SGA	29	-0.441654	-1.48942	0.0583832	0.661495	1	149	tags=24%, list=14%, signal=27%
KETOCONAZOLE_DN	49	-0.395692	-1.48828	0.0264256	0.659031	1	405	tags=49%, list=38%, signal=75%
UGA3P_TFMOTIF	19	-0.490852	-1.487	0.0685976	0.657815	1	377	tags=53%, list=35%, signal=80%
CYR1_YEAST_DN	134	-0.337088	-1.48573	0.00890585	0.656501	1	452	tags=49%, list=43%, signal=75%
RRP5_BIND	52	-0.385234	-1.48453	0.0332851	0.654785	1	492	tags=62%, list=46%, signal=109%
UPC2_DN	95	-0.347742	-1.48426	0.0169271	0.649349	1	453	tags=55%, list=43%, signal=87%
AIM44_BIND	23	-0.455724	-1.48269	0.0491071	0.649452	1	133	tags=22%, list=13%, signal=24%
PET20_SGA	17	-0.506202	-1.48136	0.0594512	0.648579	1	153	tags=35%, list=14%, signal=41%
UBR1_SGA	17	-0.514581	-1.48134	0.0666667	0.642281	1	108	tags=35%, list=10%, signal=39%
PRP4-TS_SGA	15	-0.52346	-1.48086	0.0740158	0.637885	1	114	tags=33%, list=11%, signal=37%
PMR1_SGA	43	-0.396766	-1.47442	0.0444444	0.658223	1	200	tags=35%, list=19%, signal=41%
MGM1_SGA	29	-0.437329	-1.47234	0.0650888	0.660771	1	316	tags=48%, list=30%, signal=67%
AVL9_SGA	18	-0.494738	-1.4718	0.0497667	0.656815	1	186	tags=39%, list=17%, signal=46%
NUG1_BIND	21	-0.471177	-1.47064	0.057508	0.655663	1	377	tags=57%, list=35%, signal=87%
RRI1_SGA	24	-0.456208	-1.4647	0.0664697	0.673715	1	209	tags=42%, list=20%, signal=51%
SRB2_SGA	38	-0.411612	-1.46341	0.0648012	0.673056	1	301	tags=42%, list=28%, signal=57%
FAR3_SGA	25	-0.45073	-1.46321	0.0645161	0.667661	1	151	tags=28%, list=14%, signal=32%
MNN10_BIND	48	-0.392171	-1.46247	0.0442857	0.664843	1	328	tags=40%, list=31%, signal=55%
OMS1_SGA	37	-0.405675	-1.46023	0.0525526	0.668646	1	313	tags=49%, list=29%, signal=67%
TYS1-1_SGA	28	-0.441917	-1.45978	0.0498534	0.66446	1	135	tags=25%, list=13%, signal=28%
RIBOSOME ASSEMBLY_BIO	17	-0.493119	-1.45752	0.0789889	0.668128	1	196	tags=29%, list=18%, signal=35%
HYPHAE_SPIDER_DN	78	-0.355031	-1.45173	0.0282638	0.686925	1	276	tags=42%, list=26%, signal=53%
DPB3_SGA	38	-0.404544	-1.45169	0.0385714	0.681078	1	214	tags=37%, list=20%, signal=44%
FEN1_BIND	17	-0.498946	-1.44903	0.0787781	0.686864	1	79	tags=24%, list=7%, signal=25%
SEC16-2_SGA	16	-0.516275	-1.44814	0.0765391	0.685017	1	341	tags=63%, list=32%, signal=91%
CIN8_SGA	17	-0.497386	-1.44429	0.0776545	0.696055	1	129	tags=29%, list=12%, signal=33%
APS1_SGA	18	-0.483134	-1.44312	0.0671756	0.695268	1	61	tags=22%, list=6%, signal=23%
YBR238C_SGA	20	-0.467941	-1.44266	0.0732087	0.691436	1	100	tags=20%, list=9%, signal=22%
NOP12_BIND	40	-0.392155	-1.44195	0.0553936	0.688717	1	448	tags=48%, list=42%, signal=79%
SKI7_BIND	20	-0.46408	-1.44054	0.0741325	0.689191	1	327	tags=50%, list=31%, signal=71%
RRP6_BIND	36	-0.403258	-1.439	0.0652174	0.69031	1	407	tags=56%, list=38%, signal=87%
RRNA METABOLIC PROCESS_BIO	47	-0.382164	-1.43851	0.0566038	0.686689	1	467	tags=66%, list=44%, signal=112%
DEP1_SGA	66	-0.359148	-1.43841	0.0409836	0.681636	1	252	tags=35%, list=24%, signal=43%
ATS1_SGA	27	-0.434906	-1.43814	0.0627943	0.677294	1	214	tags=41%, list=20%, signal=50%
ATP18_SGA	17	-0.494426	-1.43788	0.0825397	0.673134	1	206	tags=35%, list=19%, signal=43%
BRX1_BIND	26	-0.445864	-1.43495	0.0610687	0.680538	1	444	tags=58%, list=42%, signal=97%
EFT2_BIND	19	-0.458333	-1.43493	0.0703125	0.675359	1	261	tags=47%, list=25%, signal=62%
WHI3_SGA	29	-0.423592	-1.43463	0.0588235	0.671408	1	262	tags=41%, list=25%, signal=53%
MRT4_BIND	40	-0.400752	-1.43253	0.048062	0.675326	1	407	tags=50%, list=38%, signal=78%
CCR4_UP	55	-0.370181	-1.4318	0.0465444	0.673302	1	387	tags=51%, list=36%, signal=76%
PBP1_SGA	21	-0.457966	-1.42984	0.102446	0.675948	1	62	tags=14%, list=6%, signal=15%
DAL81_SGA	31	-0.411103	-1.42808	0.0675287	0.677639	1	139	tags=16%, list=13%, signal=18%
SRN2_BIND	24	-0.446504	-1.42744	0.0699523	0.675323	1	133	tags=25%, list=13%, signal=28%
TRANSLATIONAL INITIATION_BIO	15	-0.501106	-1.42452	0.0803858	0.682319	1	185	tags=27%, list=17%, signal=32%
TIF6_BIND	26	-0.429167	-1.42353	0.0646617	0.681597	1	519	tags=73%, list=49%, signal=139%
PTK1_SGA	22	-0.453164	-1.42308	0.0798122	0.678614	1	42	tags=14%, list=4%, signal=14%
YBR141C_SGA	32	-0.407245	-1.42261	0.0692641	0.675733	1	153	tags=28%, list=14%, signal=32%
RRNA PROCESSING_BIO	47	-0.382164	-1.42095	0.0515021	0.677509	1	467	tags=66%, list=44%, signal=112%
CELL CYCLE-MODULATED	58	-0.367895	-1.41905	0.0445682	0.680695	1	198	tags=36%, list=19%, signal=42%
STR2_SGA	18	-0.475906	-1.41815	0.0709779	0.679226	1	186	tags=33%, list=17%, signal=40%
POL32_BIND	17	-0.491241	-1.41342	0.085758	0.693975	1	130	tags=29%, list=12%, signal=33%
MGE1-100_SGA	30	-0.412201	-1.4112	0.0834598	0.698195	1	161	tags=30%, list=15%, signal=34%
APL4_SGA	26	-0.432851	-1.4052	0.0864382	0.71803	1	151	tags=27%, list=14%, signal=31%
NUCLEAR LUMEN_CEL	73	-0.343509	-1.40443	0.0434193	0.716504	1	497	tags=63%, list=47%, signal=110%
RPC53_DAMP_SGA	22	-0.442693	-1.40424	0.0941915	0.712461	1	159	tags=27%, list=15%, signal=31%
SGF29_BIND	21	-0.454943	-1.40257	0.0934579	0.71465	1	273	tags=48%, list=26%, signal=63%
RAS1_HYPHAE_DN	16	-0.478771	-1.40091	0.103286	0.716854	1	148	tags=31%, list=14%, signal=36%
RNA BINDING_MOL	34	-0.39214	-1.40058	0.0807175	0.713407	1	509	tags=68%, list=48%, signal=126%
PER1_BIND	22	-0.446344	-1.39917	0.080315	0.714839	1	105	tags=27%, list=10%, signal=30%
DOA1_BIND	39	-0.379265	-1.39757	0.0707965	0.717015	1	163	tags=23%, list=15%, signal=26%
RIM15_SGA	26	-0.427374	-1.39671	0.0816024	0.715817	1	206	tags=38%, list=19%, signal=47%
ATP12_SGA	20	-0.457091	-1.39626	0.0914826	0.712852	1	340	tags=65%, list=32%, signal=94%
ALG5_BIND	19	-0.459462	-1.39459	0.0931298	0.714879	1	105	tags=26%, list=10%, signal=29%
35S PRIMARY TRANSCRIPT PROCESSING_BIO	26	-0.426685	-1.39348	0.0766917	0.714621	1	448	tags=65%, list=42%, signal=110%
MCM10-1_SGA	15	-0.485757	-1.39299	0.0934579	0.712022	1	69	tags=20%, list=6%, signal=21%
DER1_SGA	27	-0.428605	-1.39182	0.0866261	0.712276	1	344	tags=41%, list=32%, signal=59%
BUB3_BIND	23	-0.437865	-1.39034	0.103093	0.714032	1	357	tags=52%, list=34%, signal=77%
MMS22_SGA	17	-0.467003	-1.38746	0.0862069	0.721045	1	244	tags=47%, list=23%, signal=60%
CLA30_DN	19	-0.457573	-1.38474	0.0921875	0.727785	1	245	tags=42%, list=23%, signal=54%
YTM1_BIND	17	-0.468131	-1.38418	0.106545	0.725616	1	444	tags=59%, list=42%, signal=99%
CA21CHR1X10	28	-0.416503	-1.38286	0.0966767	0.726867	1	371	tags=57%, list=35%, signal=85%
NOP1_BIND	60	-0.348805	-1.38272	0.0693878	0.72299	1	470	tags=53%, list=44%, signal=90%
ACT1-129_SGA	46	-0.365802	-1.37678	0.0852601	0.742584	1	186	tags=26%, list=17%, signal=30%
NCS6_SGA	28	-0.412254	-1.37602	0.0898204	0.741138	1	339	tags=50%, list=32%, signal=71%
CIC1_BIND	21	-0.442663	-1.37276	0.107309	0.750193	1	463	tags=67%, list=44%, signal=116%
NUP133_SGA	49	-0.361954	-1.37272	0.0776978	0.745869	1	151	tags=24%, list=14%, signal=27%
TAF6-TS_SGA	32	-0.399786	-1.37256	0.0906389	0.74214	1	139	tags=28%, list=13%, signal=31%
PHO23_SGA	57	-0.345864	-1.37198	0.0815752	0.740002	1	161	tags=21%, list=15%, signal=23%
CYTOSKELETON ORGANIZATION AND BIOGENESIS_BIO	17	-0.462076	-1.37188	0.116719	0.736104	1	226	tags=41%, list=21%, signal=51%
NIP7_BIND	21	-0.442052	-1.37024	0.103604	0.738329	1	463	tags=62%, list=44%, signal=108%
NOP15_BIND	20	-0.460195	-1.37013	0.114379	0.734548	1	463	tags=65%, list=44%, signal=113%
ERG3_BIND	33	-0.391421	-1.36798	0.0869565	0.738821	1	205	tags=30%, list=19%, signal=36%
PMA1_DAMP_SGA	30	-0.404097	-1.3677	0.0914454	0.735617	1	113	tags=23%, list=11%, signal=25%
ADA2_SGA	28	-0.417284	-1.3662	0.0917431	0.73724	1	357	tags=50%, list=34%, signal=73%
HAS1_BIND	44	-0.36957	-1.36461	0.0810811	0.739448	1	539	tags=61%, list=51%, signal=119%
POP8_BIND	15	-0.487961	-1.36311	0.114887	0.741114	1	252	tags=40%, list=24%, signal=52%
PRP43_BIND	16	-0.477375	-1.36277	0.113452	0.73839	1	386	tags=63%, list=36%, signal=97%
PRM7_SGA	15	-0.474129	-1.36158	0.112957	0.739062	1	118	tags=33%, list=11%, signal=37%
SSB1_SGA	15	-0.473319	-1.3609	0.132328	0.737653	1	3	tags=7%, list=0%, signal=7%
NOG1_BIND	32	-0.394336	-1.3599	0.104435	0.737276	1	519	tags=66%, list=49%, signal=124%
G1-S CLUSTER	24	-0.432048	-1.35888	0.124812	0.737346	1	190	tags=42%, list=18%, signal=50%
LST8-15_SGA	38	-0.377487	-1.35863	0.0885341	0.734409	1	357	tags=50%, list=34%, signal=73%
APC5-CA_SGA	38	-0.380345	-1.35598	0.0985507	0.741285	1	324	tags=45%, list=30%, signal=62%
RCO1_SGA	25	-0.420423	-1.35596	0.104524	0.737411	1	30	tags=16%, list=3%, signal=16%
UTP10_BIND	26	-0.413791	-1.35153	0.108108	0.751327	1	470	tags=62%, list=44%, signal=108%
PRE9_SGA	18	-0.450832	-1.34871	0.103279	0.758627	1	297	tags=44%, list=28%, signal=61%
SIT4_HYPHAE_UP	23	-0.424629	-1.34835	0.114729	0.755977	1	98	tags=17%, list=9%, signal=19%
HMG1_SGA	20	-0.445649	-1.34747	0.121495	0.755396	1	301	tags=50%, list=28%, signal=68%
HOS2_BIND	20	-0.445539	-1.34719	0.120061	0.752477	1	104	tags=25%, list=10%, signal=27%
T4 ACETIC-VS-CONTROL_DN	465	-0.270083	-1.34712	0.0120219	0.748908	1	322	tags=34%, list=30%, signal=27%
PMP3_BIND	17	-0.458701	-1.34583	0.126168	0.750143	1	83	tags=24%, list=8%, signal=25%
MGA2_BIND	18	-0.452264	-1.34549	0.142628	0.747668	1	40	tags=17%, list=4%, signal=17%
HCR1_BIND	32	-0.386702	-1.3434	0.0992366	0.752298	1	258	tags=28%, list=24%, signal=36%
SNORNA BINDING_MOL	17	-0.471444	-1.34283	0.135314	0.750638	1	405	tags=71%, list=38%, signal=112%
KRR1_BIND	19	-0.449357	-1.342	0.134707	0.750009	1	470	tags=63%, list=44%, signal=111%
PDR1_SGA	20	-0.437924	-1.34188	0.114583	0.746706	1	201	tags=35%, list=19%, signal=42%
Ï»¿SMALL NUCLEOLAR RIBONUCLEOPROTEIN COMPLEX_CEL	16	-0.452561	-1.34173	0.130503	0.743544	1	405	tags=69%, list=38%, signal=109%
NOC2_BIND	26	-0.414704	-1.34167	0.1226	0.740117	1	463	tags=58%, list=44%, signal=100%
RPN10_SGA	18	-0.453306	-1.3374	0.11938	0.753193	1	105	tags=22%, list=10%, signal=24%
YKL069W_BIND	18	-0.441387	-1.3372	0.13738	0.750372	1	253	tags=39%, list=24%, signal=50%
ELP6_SGA	26	-0.407371	-1.33439	0.125561	0.758332	1	357	tags=50%, list=34%, signal=73%
SIN4_SGA	65	-0.33934	-1.33406	0.0726257	0.755924	1	366	tags=48%, list=34%, signal=68%
YCR016W_SGA	15	-0.474569	-1.33383	0.1518	0.753155	1	118	tags=33%, list=11%, signal=37%
SWE1_BIND	15	-0.470971	-1.33301	0.151181	0.752725	1	96	tags=27%, list=9%, signal=29%
AKR1_SGA	19	-0.435087	-1.33293	0.123153	0.749353	1	108	tags=32%, list=10%, signal=35%
MRE11_BIND	19	-0.437937	-1.33062	0.147641	0.754617	1	130	tags=26%, list=12%, signal=29%
CA21CHRRX8	16	-0.464737	-1.33017	0.137224	0.752901	1	132	tags=25%, list=12%, signal=28%
LAS21_SGA	26	-0.40055	-1.32995	0.116592	0.750278	1	325	tags=46%, list=31%, signal=65%
UPS1_BIND	23	-0.425297	-1.32993	0.124066	0.746835	1	273	tags=39%, list=26%, signal=52%
TAF9-TS2_SGA	16	-0.462404	-1.32846	0.163807	0.749128	1	444	tags=75%, list=42%, signal=127%
UBP3_SGA	46	-0.354215	-1.32839	0.103878	0.745874	1	288	tags=37%, list=27%, signal=48%
PRB1_SGA	25	-0.402021	-1.32799	0.124812	0.743987	1	328	tags=48%, list=31%, signal=68%
PAT1_BIND	49	-0.347883	-1.32655	0.0978723	0.746084	1	287	tags=35%, list=27%, signal=45%
LDB18_SGA	23	-0.423569	-1.32652	0.136765	0.742778	1	55	tags=17%, list=5%, signal=18%
ACH1_SGA	24	-0.417902	-1.32606	0.153125	0.741059	1	143	tags=29%, list=13%, signal=33%
GENES REPRESSED BY RAPAMYCIN	124	-0.300825	-1.32374	0.0623377	0.74709	1	302	tags=30%, list=28%, signal=37%
ARX1_BIND	21	-0.423231	-1.32201	0.109231	0.750416	1	502	tags=67%, list=47%, signal=124%
CET1-15_SGA	25	-0.40873	-1.32144	0.152905	0.749137	1	114	tags=28%, list=11%, signal=31%
NUP133_BIND	26	-0.408731	-1.32096	0.139717	0.747658	1	259	tags=31%, list=24%, signal=40%
CSM1_BIND	24	-0.409518	-1.3205	0.143951	0.746114	1	305	tags=46%, list=29%, signal=63%
LSM6_BIND	42	-0.362945	-1.32011	0.106322	0.744257	1	297	tags=38%, list=28%, signal=51%
THP2_BIND	23	-0.414227	-1.31773	0.134238	0.750137	1	462	tags=61%, list=43%, signal=105%
GID8_SGA	22	-0.417371	-1.31746	0.136571	0.74788	1	139	tags=23%, list=13%, signal=26%
SUR2_BIND	17	-0.445213	-1.313	0.144674	0.761667	1	163	tags=29%, list=15%, signal=34%
CLC1_SGA	68	-0.324699	-1.31263	0.114247	0.759603	1	143	tags=21%, list=13%, signal=22%
SGF73_BIND	28	-0.393373	-1.31196	0.150943	0.758716	1	104	tags=21%, list=10%, signal=23%
UBA4_SGA	23	-0.406404	-1.31155	0.152924	0.757031	1	357	tags=52%, list=34%, signal=77%
CTF8_SGA	22	-0.414311	-1.31155	0.141321	0.753763	1	344	tags=50%, list=32%, signal=72%
PROCESSING OF 20S PRE-RRNA_BIO	17	-0.446837	-1.31081	0.152597	0.753227	1	405	tags=65%, list=38%, signal=103%
MACROMOLECULE BIOSYNTHETIC PROCESS_BIO	115	-0.299891	-1.31049	0.0768246	0.751257	1	489	tags=52%, list=46%, signal=86%
ELM1_SGA	17	-0.449898	-1.30957	0.15981	0.751452	1	357	tags=53%, list=34%, signal=78%
SGF11_BIND	15	-0.468323	-1.30949	0.140753	0.748562	1	202	tags=27%, list=19%, signal=32%
BIM1_BIND	16	-0.461858	-1.30933	0.146965	0.746064	1	202	tags=38%, list=19%, signal=46%
CSM1_SGA	40	-0.359994	-1.3076	0.118421	0.749312	1	232	tags=33%, list=22%, signal=40%
MITOCHONDRION_CEL	126	-0.296543	-1.30499	0.0779055	0.75599	1	384	tags=46%, list=36%, signal=64%
RRS1_BIND	18	-0.448824	-1.30455	0.162939	0.754438	1	463	tags=61%, list=44%, signal=106%
YAF9_BIND	22	-0.426425	-1.30418	0.143548	0.75269	1	96	tags=23%, list=9%, signal=24%
NOP14_BIND	17	-0.443104	-1.30347	0.1504	0.752146	1	491	tags=65%, list=46%, signal=118%
SAC7_BIND	15	-0.453753	-1.30086	0.152733	0.758782	1	105	tags=27%, list=10%, signal=29%
SLU7-TS1_SGA	19	-0.433622	-1.29973	0.146379	0.760077	1	297	tags=47%, list=28%, signal=65%
SRO7_BIND	17	-0.443791	-1.29965	0.157303	0.757248	1	67	tags=18%, list=6%, signal=19%
GIN4_SGA	15	-0.466429	-1.29955	0.170079	0.754479	1	288	tags=47%, list=27%, signal=63%
NSA1_BIND	16	-0.450244	-1.29889	0.155738	0.753716	1	444	tags=56%, list=42%, signal=95%
BUB1_BIND	20	-0.428351	-1.29835	0.158385	0.752786	1	224	tags=40%, list=21%, signal=50%
CUP5_SGA	44	-0.35413	-1.29792	0.131313	0.751366	1	166	tags=25%, list=16%, signal=28%
ERG11_DAMP_SGA	17	-0.447959	-1.29765	0.188198	0.749248	1	129	tags=24%, list=12%, signal=26%
SLA1_BIND	34	-0.36964	-1.29503	0.15015	0.755969	1	83	tags=15%, list=8%, signal=15%
CAP2_DN	70	-0.318965	-1.29456	0.0909091	0.75468	1	243	tags=33%, list=23%, signal=40%
MTW1-TS_SGA	17	-0.439504	-1.29369	0.174254	0.754835	1	161	tags=35%, list=15%, signal=41%
RPC40_BIND	20	-0.427821	-1.29284	0.146104	0.755134	1	375	tags=60%, list=35%, signal=91%
CHROMOSOME_CEL	16	-0.447719	-1.29109	0.179276	0.758708	1	121	tags=19%, list=11%, signal=21%
PRP4-1_SGA	65	-0.322836	-1.29083	0.113182	0.756664	1	151	tags=22%, list=14%, signal=24%
IPK1_SGA	25	-0.404723	-1.29074	0.153488	0.75409	1	129	tags=20%, list=12%, signal=22%
COX10_SGA	44	-0.34412	-1.28955	0.132857	0.755408	1	214	tags=30%, list=20%, signal=35%
UPS1_SGA	38	-0.360514	-1.28927	0.150646	0.753567	1	224	tags=34%, list=21%, signal=42%
MED7-163_SGA	25	-0.391698	-1.2885	0.163043	0.753472	1	252	tags=36%, list=24%, signal=46%
RPL3_BIND	48	-0.349298	-1.28732	0.133793	0.754906	1	583	tags=63%, list=55%, signal=132%
ARF1_SGA	39	-0.357309	-1.28637	0.133136	0.755463	1	30	tags=10%, list=3%, signal=10%
SVL3_SGA	22	-0.411902	-1.28634	0.153383	0.752684	1	105	tags=27%, list=10%, signal=30%
SEC3_SGA	19	-0.419741	-1.28618	0.169518	0.750365	1	325	tags=58%, list=31%, signal=82%
NIP7-1_SGA	15	-0.448927	-1.28508	0.177706	0.75169	1	357	tags=53%, list=34%, signal=79%
YNL181W_DAMP_SGA	15	-0.447382	-1.28293	0.17134	0.756727	1	325	tags=47%, list=31%, signal=66%
YTA7_BIND	25	-0.397041	-1.28068	0.17175	0.762132	1	114	tags=20%, list=11%, signal=22%
CA21CHRRX4	23	-0.39493	-1.27964	0.177542	0.763108	1	167	tags=30%, list=16%, signal=35%
OXIDOREDUCTASE ACTIVITY, ACTING ON THE CH-OH GROUP OF DONORS, NAD OR NADP AS ACCEPTOR_MOL	21	-0.408948	-1.27954	0.153722	0.760548	1	139	tags=24%, list=13%, signal=27%
SDS22-5_SGA	16	-0.448408	-1.27947	0.186603	0.757951	1	357	tags=56%, list=34%, signal=83%
SST2_BIND	15	-0.457682	-1.27884	0.165275	0.757396	1	4	tags=7%, list=0%, signal=7%
UTP8_BIND	18	-0.435506	-1.27845	0.166403	0.756042	1	470	tags=67%, list=44%, signal=117%
CA21CHR5X1	20	-0.416236	-1.27796	0.169139	0.755061	1	143	tags=20%, list=13%, signal=23%
ARV1_SGA	17	-0.437021	-1.27771	0.175824	0.753275	1	3	tags=6%, list=0%, signal=6%
YDL133W_SGA	23	-0.407126	-1.27739	0.163833	0.751707	1	252	tags=35%, list=24%, signal=45%
OPI3_BIND	43	-0.347598	-1.27373	0.135328	0.76213	1	151	tags=26%, list=14%, signal=29%
SAM35-2_SGA	16	-0.446912	-1.27145	0.18138	0.767863	1	313	tags=44%, list=29%, signal=61%
NUP57-E17_SGA	24	-0.396525	-1.27134	0.194785	0.765429	1	151	tags=25%, list=14%, signal=28%
DAM1-9_SGA	20	-0.413832	-1.27132	0.167692	0.762748	1	133	tags=25%, list=13%, signal=28%
MSS2_SGA	15	-0.435384	-1.26956	0.201563	0.766234	1	347	tags=53%, list=33%, signal=78%
ISW2_BIND	15	-0.443326	-1.26643	0.187192	0.775372	1	186	tags=40%, list=17%, signal=48%
CGR1_BIND	30	-0.369685	-1.26448	0.167683	0.779857	1	262	tags=33%, list=25%, signal=43%
TIF5_DAMP_SGA	15	-0.44587	-1.26336	0.190476	0.781191	1	418	tags=60%, list=39%, signal=97%
MITOCHONDRIAL PART_CEL	90	-0.298303	-1.26021	0.11828	0.789783	1	384	tags=49%, list=36%, signal=70%
YHR020W_DAMP_SGA	18	-0.422606	-1.25977	0.187402	0.788826	1	462	tags=72%, list=43%, signal=126%
ACT1-136_SGA	20	-0.405003	-1.25887	0.192496	0.789162	1	223	tags=35%, list=21%, signal=43%
HUR1_SGA	28	-0.381452	-1.25806	0.173643	0.78908	1	135	tags=25%, list=13%, signal=28%
WHI5_SGA	25	-0.389965	-1.25732	0.179878	0.789126	1	223	tags=40%, list=21%, signal=49%
CA21CHRRX3	15	-0.440907	-1.25673	0.183333	0.788506	1	173	tags=33%, list=16%, signal=39%
PAM18-1_SGA	15	-0.429815	-1.25667	0.190476	0.785988	1	252	tags=40%, list=24%, signal=52%
BEM2_BIND	28	-0.37452	-1.25598	0.189681	0.785813	1	345	tags=39%, list=32%, signal=57%
RAD51_BIND	20	-0.409654	-1.25533	0.201538	0.785635	1	182	tags=30%, list=17%, signal=36%
PSK2_SGA	21	-0.399851	-1.25242	0.178964	0.79325	1	149	tags=29%, list=14%, signal=33%
MAF1_SGA	22	-0.408212	-1.25226	0.180556	0.791152	1	186	tags=32%, list=17%, signal=38%
SAC3_SGA	17	-0.427174	-1.24934	0.185358	0.799082	1	252	tags=41%, list=24%, signal=53%
COX10_BIND	18	-0.424007	-1.24808	0.20268	0.800966	1	287	tags=44%, list=27%, signal=60%
CA21CHR7X3	19	-0.412776	-1.24606	0.190337	0.805757	1	409	tags=63%, list=38%, signal=101%
LSM7_BIND	45	-0.341005	-1.24505	0.163059	0.806755	1	286	tags=33%, list=27%, signal=44%
TIF4631_BIND	22	-0.399632	-1.24391	0.209449	0.808153	1	509	tags=68%, list=48%, signal=128%
CKB2_SGA	35	-0.355191	-1.24309	0.16185	0.80857	1	186	tags=29%, list=17%, signal=33%
NAT4_SGA	24	-0.389617	-1.24105	0.201515	0.813428	1	227	tags=33%, list=21%, signal=41%
HIR1_SGA	24	-0.39385	-1.24081	0.181957	0.811621	1	133	tags=25%, list=13%, signal=28%
NUP60_BIND	27	-0.374316	-1.2408	0.199081	0.80898	1	543	tags=70%, list=51%, signal=140%
DYS1_DAMP_SGA	29	-0.360433	-1.23991	0.209553	0.80941	1	191	tags=24%, list=18%, signal=29%
CA21CHR5X5	24	-0.387635	-1.23857	0.182553	0.811706	1	247	tags=33%, list=23%, signal=42%
RPL15A_BIND	19	-0.413452	-1.23857	0.202875	0.809056	1	339	tags=26%, list=32%, signal=38%
MPP10_BIND	23	-0.38781	-1.23853	0.210926	0.806556	1	470	tags=61%, list=44%, signal=107%
BEM4_BIND	17	-0.41828	-1.23686	0.219092	0.809969	1	133	tags=29%, list=13%, signal=33%
RVS161_BIND	43	-0.335378	-1.23486	0.188202	0.814534	1	273	tags=33%, list=26%, signal=42%
NUP84_BIND	21	-0.401727	-1.23051	0.224615	0.827971	1	488	tags=67%, list=46%, signal=121%
CDC48-3_SGA	25	-0.381326	-1.23018	0.202435	0.826494	1	139	tags=24%, list=13%, signal=27%
NBP2_SGA	23	-0.389406	-1.22898	0.214178	0.828118	1	214	tags=30%, list=20%, signal=37%
RPL27A_BIND	24	-0.379245	-1.22896	0.201923	0.825495	1	290	tags=29%, list=27%, signal=39%
TSC13_DAMP_SGA	32	-0.351189	-1.22872	0.190272	0.823824	1	129	tags=22%, list=12%, signal=24%
PSD1_SGA	59	-0.311356	-1.22808	0.162347	0.82338	1	301	tags=39%, list=28%, signal=51%
YIR016W_SGA	36	-0.341878	-1.22609	0.204871	0.827979	1	107	tags=19%, list=10%, signal=21%
CKB2_BIND	32	-0.353687	-1.22562	0.192806	0.827334	1	202	tags=28%, list=19%, signal=34%
RPD3_SGA	77	-0.297957	-1.22529	0.155792	0.825924	1	191	tags=25%, list=18%, signal=28%
UTP22_BIND	28	-0.370988	-1.22467	0.199697	0.825559	1	470	tags=61%, list=44%, signal=106%
SPP381_DAMP_SGA	28	-0.36807	-1.22416	0.209801	0.824834	1	105	tags=18%, list=10%, signal=19%
IPK1_BIND	15	-0.437466	-1.22291	0.223473	0.826696	1	182	tags=33%, list=17%, signal=40%
RPL11B_BIND	19	-0.401763	-1.2227	0.221338	0.824793	1	279	tags=26%, list=26%, signal=35%
VPS51_SGA	30	-0.361934	-1.22221	0.193452	0.824106	1	252	tags=30%, list=24%, signal=38%
HYPHAE_UP	48	-0.320091	-1.22052	0.181556	0.827305	1	36	tags=10%, list=3%, signal=10%
RIM20_SGA	21	-0.388638	-1.21949	0.2	0.828349	1	328	tags=43%, list=31%, signal=61%
DCP2-7_SGA	30	-0.3669	-1.21828	0.201504	0.830132	1	151	tags=23%, list=14%, signal=26%
MYO5_BIND	16	-0.41519	-1.21657	0.221519	0.833797	1	83	tags=19%, list=8%, signal=20%
CDC27-1_SGA	18	-0.408927	-1.21582	0.229329	0.833921	1	127	tags=28%, list=12%, signal=31%
ETR1_BIND	19	-0.397025	-1.21373	0.2272	0.839124	1	252	tags=32%, list=24%, signal=41%
SDS3_BIND	39	-0.339497	-1.21342	0.214804	0.837727	1	318	tags=36%, list=30%, signal=49%
SEC22-3_SGA	28	-0.368897	-1.21298	0.198847	0.83667	1	240	tags=43%, list=23%, signal=54%
MKS1_BIND	19	-0.399862	-1.21197	0.226708	0.837989	1	418	tags=53%, list=39%, signal=85%
RLP7_DAMP_SGA	24	-0.371816	-1.21129	0.228018	0.837987	1	273	tags=29%, list=26%, signal=38%
MDM10_SGA	44	-0.333654	-1.21081	0.192529	0.837259	1	119	tags=23%, list=11%, signal=25%
POB3-L78R_SGA	34	-0.346801	-1.21048	0.217201	0.835857	1	257	tags=32%, list=24%, signal=41%
HTB1_BIND	20	-0.395615	-1.20908	0.245482	0.838277	1	112	tags=25%, list=11%, signal=27%
MNN11_SGA	34	-0.34957	-1.20836	0.216216	0.838314	1	33	tags=15%, list=3%, signal=15%
SSE1_BIND	39	-0.333224	-1.20812	0.182482	0.836707	1	283	tags=38%, list=27%, signal=50%
MAK21_BIND	15	-0.423463	-1.20808	0.210784	0.834374	1	187	tags=27%, list=18%, signal=32%
MNN2_BIND	15	-0.432881	-1.20801	0.248013	0.832142	1	105	tags=27%, list=10%, signal=29%
LEA1_SGA	32	-0.351178	-1.20623	0.216617	0.835842	1	494	tags=63%, list=46%, signal=113%
NUCLEOTIDYLTRANSFERASE ACTIVITY_MOL	21	-0.389656	-1.20493	0.234076	0.838079	1	375	tags=52%, list=35%, signal=79%
NOP7_BIND	24	-0.381096	-1.20475	0.227068	0.836248	1	355	tags=42%, list=33%, signal=61%
ILV3_DAMP_SGA	30	-0.354073	-1.20338	0.216885	0.838688	1	161	tags=27%, list=15%, signal=31%
CD_DN	28	-0.367355	-1.2033	0.222707	0.836567	1	432	tags=61%, list=41%, signal=100%
RSP5-3_SGA	26	-0.368014	-1.20329	0.232489	0.834153	1	149	tags=27%, list=14%, signal=31%
TIM13_SGA	29	-0.355935	-1.20257	0.230047	0.83427	1	272	tags=38%, list=26%, signal=50%
CSF1_SGA	28	-0.358476	-1.20152	0.208459	0.835353	1	357	tags=46%, list=34%, signal=68%
SSB2_BIND	33	-0.351112	-1.2008	0.237693	0.835295	1	484	tags=64%, list=46%, signal=113%
SOH1_BIND	27	-0.365094	-1.19995	0.219033	0.836035	1	407	tags=52%, list=38%, signal=82%
URE2_SGA	25	-0.373349	-1.19929	0.225758	0.836049	1	252	tags=36%, list=24%, signal=46%
CDC60-TS_SGA	20	-0.391189	-1.19863	0.238022	0.836097	1	69	tags=15%, list=6%, signal=16%
RML2_SGA	61	-0.3046	-1.19848	0.196286	0.834261	1	166	tags=25%, list=16%, signal=27%
CDC4-3_SGA	23	-0.375519	-1.19754	0.23477	0.835166	1	318	tags=43%, list=30%, signal=61%
PAP2_SGA	50	-0.320514	-1.19667	0.201439	0.835886	1	240	tags=30%, list=23%, signal=37%
CSL4_BIND	15	-0.432542	-1.19585	0.262903	0.836328	1	393	tags=53%, list=37%, signal=83%
TRANSLATION FACTOR ACTIVITY, NUCLEIC ACID BINDING_MOL	19	-0.384229	-1.19469	0.233645	0.83815	1	258	tags=26%, list=24%, signal=34%
RPC19_DAMP_SGA	23	-0.372139	-1.19375	0.238462	0.839065	1	357	tags=43%, list=34%, signal=64%
RPS6B_SGA	20	-0.396284	-1.19358	0.240064	0.837303	1	214	tags=25%, list=20%, signal=31%
LSM4_DAMP_SGA	26	-0.36346	-1.1934	0.231861	0.835618	1	153	tags=23%, list=14%, signal=26%
BUD27_SGA	36	-0.339547	-1.19224	0.218705	0.837295	1	217	tags=25%, list=20%, signal=30%
EFT2_SGA	16	-0.410611	-1.19068	0.251956	0.840414	1	133	tags=25%, list=13%, signal=28%
GCR2_SGA	39	-0.335339	-1.19035	0.242291	0.839251	1	95	tags=15%, list=9%, signal=16%
PAC11_SGA	29	-0.354555	-1.18967	0.235556	0.83952	1	33	tags=14%, list=3%, signal=14%
UBR2_SGA	22	-0.377791	-1.1882	0.237942	0.842153	1	325	tags=41%, list=31%, signal=58%
RVB2_DAMP_SGA	18	-0.405255	-1.18816	0.246006	0.83997	1	129	tags=22%, list=12%, signal=25%
DID4_SGA	29	-0.346652	-1.18543	0.224583	0.847001	1	325	tags=38%, list=31%, signal=53%
PRT1-1_SGA	22	-0.375581	-1.18471	0.26161	0.847283	1	244	tags=32%, list=23%, signal=40%
RSC6_BIND	17	-0.404317	-1.18458	0.257716	0.845407	1	214	tags=35%, list=20%, signal=43%
DBP10_BIND	15	-0.408361	-1.18283	0.267717	0.849166	1	535	tags=80%, list=50%, signal=159%
HTZ1_SGA	26	-0.352023	-1.18275	0.240181	0.847159	1	378	tags=50%, list=36%, signal=76%
CAJ1_BIND	15	-0.407712	-1.18124	0.267606	0.85021	1	224	tags=40%, list=21%, signal=50%
SAC3_BIND	41	-0.321604	-1.18098	0.232659	0.84892	1	253	tags=29%, list=24%, signal=37%
MCT1_SGA	17	-0.404688	-1.18037	0.262561	0.848741	1	273	tags=41%, list=26%, signal=55%
CDC8-2_SGA	18	-0.395149	-1.17996	0.270736	0.847874	1	358	tags=56%, list=34%, signal=82%
ECM16_BIND	24	-0.368194	-1.17898	0.217666	0.848993	1	530	tags=67%, list=50%, signal=130%
RSC4-2_SGA	25	-0.362961	-1.17892	0.266254	0.846941	1	483	tags=56%, list=45%, signal=100%
CA21CHRRX6	23	-0.366003	-1.17867	0.250382	0.845618	1	174	tags=26%, list=16%, signal=31%
RPS24A_BIND	20	-0.378329	-1.17855	0.272727	0.843754	1	223	tags=30%, list=21%, signal=37%
DIA2_BIND	22	-0.372355	-1.17819	0.253456	0.842787	1	130	tags=23%, list=12%, signal=25%
CYTOSKELETAL PART_CEL	25	-0.358882	-1.17805	0.249231	0.841059	1	116	tags=20%, list=11%, signal=22%
RPS16A_BIND	18	-0.398736	-1.17782	0.255151	0.839665	1	279	tags=33%, list=26%, signal=44%
CSE2_SGA	52	-0.309644	-1.17771	0.251076	0.837831	1	469	tags=56%, list=44%, signal=95%
CA21CHR1X11	16	-0.409571	-1.17769	0.261637	0.835736	1	314	tags=56%, list=30%, signal=79%
LGE1_SGA	45	-0.322989	-1.1768	0.237741	0.836515	1	358	tags=40%, list=34%, signal=58%
ELP6_BIND	37	-0.325756	-1.17575	0.243363	0.837873	1	141	tags=19%, list=13%, signal=21%
RAD52_BIND	25	-0.366117	-1.17564	0.259317	0.836105	1	147	tags=28%, list=14%, signal=32%
SOH1_SGA	43	-0.315933	-1.17282	0.244253	0.843798	1	126	tags=21%, list=12%, signal=23%
T1 LACTIC-VS-CONTROL_DN	160	-0.257297	-1.17153	0.180825	0.845783	1	310	tags=38%, list=29%, signal=45%
TRANSLATION REGULATOR ACTIVITY_MOL	19	-0.384229	-1.17138	0.256881	0.844081	1	258	tags=26%, list=24%, signal=34%
STRUCTURAL MOLECULE ACTIVITY_MOL	85	-0.279769	-1.17118	0.231691	0.842627	1	384	tags=45%, list=36%, signal=64%
RAV2_SGA	15	-0.413519	-1.17112	0.264657	0.840685	1	130	tags=27%, list=12%, signal=30%
SCS7_BIND	39	-0.325874	-1.17062	0.249263	0.840347	1	40	tags=13%, list=4%, signal=13%
SEC22_SGA	34	-0.335453	-1.16674	0.240688	0.851188	1	252	tags=35%, list=24%, signal=45%
YTA7_SGA	22	-0.362099	-1.16674	0.264798	0.849028	1	186	tags=23%, list=17%, signal=27%
LSM1_BIND	55	-0.300118	-1.16493	0.252161	0.853147	1	270	tags=31%, list=25%, signal=39%
PMN PHAGOCYTOSIS_DN	52	-0.302285	-1.16456	0.241429	0.852189	1	175	tags=21%, list=16%, signal=24%
ARF1_BIND	23	-0.358849	-1.16353	0.262166	0.853435	1	105	tags=17%, list=10%, signal=19%
ATP11_SGA	71	-0.286073	-1.16343	0.217096	0.851601	1	252	tags=28%, list=24%, signal=34%
ELP4_SGA	15	-0.410952	-1.16267	0.260062	0.852052	1	328	tags=53%, list=31%, signal=76%
TRANSPORTER ACTIVITY_MOL	52	-0.305915	-1.16196	0.249271	0.852363	1	118	tags=17%, list=11%, signal=19%
AIM22_SGA	22	-0.374912	-1.16176	0.271472	0.850849	1	191	tags=27%, list=18%, signal=33%
ERD1_BIND	20	-0.381537	-1.15958	0.264264	0.85606	1	19	tags=15%, list=2%, signal=15%
SDS3_SGA	38	-0.321658	-1.15881	0.251095	0.85643	1	248	tags=26%, list=23%, signal=33%
ERB1_BIND	22	-0.368958	-1.15815	0.254491	0.856465	1	463	tags=55%, list=44%, signal=95%
SUT2_SGA	15	-0.411479	-1.15658	0.27874	0.859966	1	110	tags=27%, list=10%, signal=29%
NDT80_DN	15	-0.399444	-1.15539	0.291139	0.861752	1	2	tags=7%, list=0%, signal=7%
EAF7_BIND	23	-0.365945	-1.15471	0.284591	0.861877	1	273	tags=35%, list=26%, signal=46%
IRA2_SGA	78	-0.280747	-1.15467	0.245542	0.859877	1	149	tags=19%, list=14%, signal=21%
TUB2_BIND	15	-0.399015	-1.15335	0.288	0.86218	1	227	tags=33%, list=21%, signal=42%
KAP122_BIND	15	-0.402627	-1.15258	0.296875	0.862676	1	357	tags=47%, list=34%, signal=69%
EDE1_SGA	20	-0.380439	-1.15227	0.278302	0.861685	1	139	tags=30%, list=13%, signal=34%
EBP2_BIND	18	-0.388535	-1.15166	0.269537	0.861639	1	463	tags=61%, list=44%, signal=106%
NIP100_SGA	25	-0.361375	-1.15043	0.303544	0.863645	1	46	tags=12%, list=4%, signal=12%
DRS1_BIND	16	-0.389575	-1.14943	0.298921	0.864802	1	187	tags=25%, list=18%, signal=30%
SKT5_SGA	30	-0.335306	-1.14907	0.259259	0.863983	1	325	tags=43%, list=31%, signal=61%
CLN3_BIND	15	-0.404926	-1.14864	0.307099	0.863429	1	185	tags=40%, list=17%, signal=48%
STU1-5_SGA	22	-0.366105	-1.14843	0.292913	0.862057	1	252	tags=36%, list=24%, signal=47%
YGL235W_BIND	20	-0.374687	-1.14754	0.293831	0.863046	1	214	tags=30%, list=20%, signal=37%
LTV1_BIND	29	-0.343435	-1.14726	0.278106	0.86203	1	509	tags=52%, list=48%, signal=97%
CBP4_SGA	16	-0.402299	-1.14644	0.294852	0.862693	1	42	tags=13%, list=4%, signal=13%
UTP15_BIND	24	-0.353316	-1.14621	0.286859	0.86144	1	530	tags=67%, list=50%, signal=130%
YLR152C_SGA	18	-0.395261	-1.14404	0.31562	0.866574	1	198	tags=39%, list=19%, signal=47%
CA21CHR3X1	25	-0.352366	-1.14326	0.30303	0.866993	1	69	tags=16%, list=6%, signal=17%
RHB1_SGA	26	-0.345823	-1.14137	0.298137	0.871376	1	250	tags=35%, list=24%, signal=44%
CTF18_BIND	21	-0.363786	-1.13979	0.29549	0.874563	1	130	tags=24%, list=12%, signal=27%
RPL13A_SGA	17	-0.38856	-1.13873	0.301459	0.876041	1	462	tags=53%, list=43%, signal=92%
LRS4_BIND	16	-0.399719	-1.13864	0.301639	0.874288	1	259	tags=44%, list=24%, signal=57%
HPT1_SGA	33	-0.333467	-1.13802	0.268222	0.87434	1	150	tags=21%, list=14%, signal=24%
UME6_SGA	25	-0.357123	-1.13706	0.29771	0.875663	1	357	tags=40%, list=34%, signal=59%
SEC72_BIND	15	-0.400442	-1.13594	0.316693	0.877422	1	83	tags=20%, list=8%, signal=21%
XDJ1_SGA	15	-0.407689	-1.13575	0.296	0.876013	1	223	tags=40%, list=21%, signal=50%
OS(2006)_DN	78	-0.274763	-1.13562	0.25	0.874404	1	460	tags=51%, list=43%, signal=84%
INO4_BIND	21	-0.369214	-1.13489	0.299213	0.874887	1	151	tags=24%, list=14%, signal=27%
GAB1-1_SGA	20	-0.367789	-1.13429	0.299539	0.874868	1	325	tags=45%, list=31%, signal=64%
CA21CHR2X9	21	-0.37538	-1.13388	0.308544	0.87423	1	2	tags=5%, list=0%, signal=5%
CA21CHR1X14	19	-0.370737	-1.13221	0.304625	0.8778	1	255	tags=37%, list=24%, signal=48%
SKI2_BIND	18	-0.383824	-1.13156	0.307942	0.877989	1	462	tags=50%, list=43%, signal=87%
BUB3_SGA	47	-0.305808	-1.13144	0.285094	0.876366	1	223	tags=28%, list=21%, signal=33%
SNU66_BIND	16	-0.389252	-1.12883	0.306061	0.882957	1	270	tags=38%, list=25%, signal=50%
TAF8-7_SGA	53	-0.295219	-1.12743	0.287943	0.885752	1	328	tags=36%, list=31%, signal=49%
NUCLEOCYTOPLASMIC TRANSPORT_BIO	24	-0.34682	-1.12619	0.318612	0.88776	1	322	tags=33%, list=30%, signal=47%
RPL23A_SGA	21	-0.359176	-1.12603	0.301587	0.886277	1	495	tags=57%, list=47%, signal=105%
SWP1_DAMP_SGA	31	-0.332576	-1.12599	0.306785	0.884374	1	151	tags=23%, list=14%, signal=26%
SSC1-2_SGA	21	-0.362524	-1.12595	0.296	0.882504	1	214	tags=29%, list=20%, signal=35%
LIGASE ACTIVITY, FORMING AMINOACYL-TRNA AND RELATED COMPOUNDS_MOL	18	-0.375432	-1.12528	0.313665	0.882754	1	528	tags=56%, list=50%, signal=109%
CIK1_BIND	27	-0.340424	-1.12516	0.314843	0.881182	1	104	tags=19%, list=10%, signal=20%
NUCLEASE ACTIVITY_MOL	20	-0.36655	-1.12441	0.31853	0.881681	1	487	tags=80%, list=46%, signal=145%
BCS1_SGA	15	-0.391112	-1.1236	0.318323	0.88234	1	418	tags=60%, list=39%, signal=97%
AMINOACYL-TRNA LIGASE ACTIVITY_MOL	18	-0.375432	-1.12241	0.331746	0.88453	1	528	tags=56%, list=50%, signal=109%
CIN2_SGA	17	-0.381337	-1.12204	0.320755	0.883743	1	114	tags=24%, list=11%, signal=26%
CATION TRANSPORT_BIO	18	-0.368912	-1.12094	0.33121	0.885267	1	192	tags=33%, list=18%, signal=40%
RPS4B_SGA	15	-0.396112	-1.12083	0.325397	0.883667	1	473	tags=60%, list=44%, signal=107%
CNE1_BIND	15	-0.401307	-1.12029	0.308661	0.883484	1	111	tags=27%, list=10%, signal=29%
CTF18_SGA	25	-0.342078	-1.11845	0.317073	0.887585	1	166	tags=24%, list=16%, signal=28%
PMT2_BIND	16	-0.386087	-1.11812	0.330218	0.886683	1	105	tags=19%, list=10%, signal=20%
SWI3_SGA	60	-0.282015	-1.11801	0.273713	0.88512	1	232	tags=23%, list=22%, signal=28%
ZCF21-BOUND-PEREZ	39	-0.312276	-1.11671	0.300429	0.887364	1	107	tags=15%, list=10%, signal=16%
GLD-DOWN	20	-0.370306	-1.11623	0.311042	0.88697	1	400	tags=70%, list=38%, signal=110%
LIGASE ACTIVITY, FORMING CARBON-OXYGEN BONDS_MOL	18	-0.375432	-1.11494	0.313916	0.889116	1	528	tags=56%, list=50%, signal=109%
MDN1_BIND	18	-0.377849	-1.11388	0.322684	0.890571	1	432	tags=56%, list=41%, signal=92%
CYTOSKELETON_CEL	27	-0.339735	-1.11293	0.311669	0.891692	1	116	tags=19%, list=11%, signal=20%
SBH1_SGA	15	-0.393742	-1.11292	0.332242	0.889804	1	129	tags=27%, list=12%, signal=30%
HYDROLASE ACTIVITY, ACTING ON ESTER BONDS_MOL	35	-0.318054	-1.11287	0.312411	0.888043	1	141	tags=26%, list=13%, signal=29%
EPT1_SGA	15	-0.394784	-1.11263	0.326019	0.886911	1	103	tags=20%, list=10%, signal=22%
NAP1_SGA	35	-0.314654	-1.11194	0.307246	0.887301	1	105	tags=17%, list=10%, signal=18%
UBC7_BIND	18	-0.374949	-1.11175	0.334967	0.886024	1	96	tags=22%, list=9%, signal=24%
HTA1_BIND	25	-0.339668	-1.11096	0.299237	0.8865	1	247	tags=36%, list=23%, signal=46%
CA21CHR4X2	17	-0.381419	-1.10968	0.3392	0.888879	1	346	tags=47%, list=33%, signal=69%
ORC2-2_SGA	46	-0.29638	-1.10904	0.320346	0.88903	1	297	tags=30%, list=28%, signal=40%
CYR1_HYPHAE_DN	100	-0.258991	-1.10897	0.273418	0.887355	1	251	tags=27%, list=24%, signal=32%
SEC13-1_SGA	19	-0.373706	-1.10838	0.336449	0.887442	1	325	tags=53%, list=31%, signal=74%
TRNA-CHARGING_PATH	18	-0.375432	-1.10663	0.316614	0.891144	1	528	tags=56%, list=50%, signal=109%
HTB2_BIND	17	-0.387402	-1.10657	0.343042	0.889457	1	186	tags=29%, list=17%, signal=35%
MGR1_SGA	41	-0.309228	-1.10597	0.323699	0.889648	1	342	tags=37%, list=32%, signal=52%
TRANSFERASE ACTIVITY, TRANSFERRING PHOSPHORUS-CONTAINING GROUPS_MOL	38	-0.305938	-1.1058	0.316358	0.888268	1	525	tags=71%, list=49%, signal=135%
SNF6-UP-37C	228	-0.231505	-1.10445	0.269953	0.890552	1	271	tags=29%, list=25%, signal=30%
METHYLTRANSFERASE ACTIVITY_MOL	16	-0.380109	-1.10342	0.339036	0.891986	1	466	tags=69%, list=44%, signal=121%
RPN12-1_SGA	26	-0.337299	-1.10299	0.319018	0.891477	1	129	tags=19%, list=12%, signal=21%
RPF2_BIND	16	-0.376138	-1.10259	0.341049	0.890897	1	463	tags=56%, list=44%, signal=98%
GIM3_BIND	31	-0.319227	-1.10131	0.327007	0.893159	1	96	tags=16%, list=9%, signal=17%
THR4_BIND	28	-0.331305	-1.10088	0.325	0.892636	1	163	tags=25%, list=15%, signal=29%
BUD13_BIND	18	-0.37079	-1.09991	0.366509	0.893912	1	132	tags=17%, list=12%, signal=19%
HAC1_SGA	25	-0.332046	-1.09929	0.340675	0.893939	1	105	tags=24%, list=10%, signal=26%
RPA135_BIND	23	-0.347211	-1.09922	0.319697	0.892322	1	375	tags=48%, list=35%, signal=72%
YPT31_SGA	37	-0.3095	-1.09917	0.317109	0.890616	1	186	tags=24%, list=17%, signal=28%
VPS64_BIND	16	-0.382362	-1.09911	0.346216	0.888951	1	543	tags=81%, list=51%, signal=164%
MTR4-1_SGA	22	-0.347132	-1.09895	0.346626	0.887565	1	400	tags=55%, list=38%, signal=86%
RPS8A_BIND	51	-0.291797	-1.09796	0.3241	0.888983	1	279	tags=27%, list=26%, signal=35%
SKO1_DN	118	-0.248278	-1.09757	0.317647	0.888363	1	448	tags=54%, list=42%, signal=83%
SMT3_DAMP_SGA	23	-0.34726	-1.09708	0.34139	0.888063	1	339	tags=48%, list=32%, signal=69%
CA21CHR3X3	27	-0.333011	-1.09698	0.3375	0.886605	1	267	tags=37%, list=25%, signal=48%
ELM1_BIND	15	-0.389733	-1.09536	0.342809	0.890051	1	105	tags=20%, list=10%, signal=22%
UBP1_SGA	25	-0.333849	-1.09514	0.323029	0.888926	1	90	tags=16%, list=8%, signal=17%
NAP1_BIND	25	-0.332438	-1.09454	0.347032	0.888987	1	371	tags=48%, list=35%, signal=72%
BMS1_BIND	29	-0.330627	-1.09128	0.341142	0.897359	1	506	tags=62%, list=48%, signal=115%
LAS21_BIND	22	-0.350715	-1.09099	0.335303	0.896376	1	139	tags=23%, list=13%, signal=26%
UTP9_BIND	16	-0.379181	-1.08951	0.354232	0.899201	1	467	tags=75%, list=44%, signal=132%
RPL20A_BIND	37	-0.311538	-1.08937	0.346821	0.897886	1	536	tags=49%, list=50%, signal=95%
PAB1_BIND	31	-0.325513	-1.08891	0.346269	0.897585	1	309	tags=35%, list=29%, signal=49%
TEF2_BIND	22	-0.348089	-1.08814	0.375191	0.898154	1	244	tags=27%, list=23%, signal=35%
PAC10_BIND	21	-0.351986	-1.08784	0.360983	0.89733	1	133	tags=19%, list=13%, signal=21%
PUF4_BIND	23	-0.335601	-1.08766	0.346395	0.896092	1	270	tags=30%, list=25%, signal=40%
PAP2_BIND	20	-0.351641	-1.08766	0.345541	0.894307	1	466	tags=60%, list=44%, signal=105%
PRP28-101_SGA	20	-0.361569	-1.08764	0.361331	0.892568	1	297	tags=40%, list=28%, signal=54%
SLA1_SGA	29	-0.324981	-1.08657	0.366322	0.894077	1	186	tags=28%, list=17%, signal=33%
MAK16_DAMP_SGA	22	-0.34568	-1.08539	0.360429	0.895891	1	61	tags=14%, list=6%, signal=14%
MRP51_BIND	17	-0.369589	-1.08488	0.357257	0.895724	1	445	tags=76%, list=42%, signal=129%
RRP8_SGA	18	-0.363744	-1.08285	0.365204	0.900365	1	483	tags=50%, list=45%, signal=90%
CTK1_BIND	16	-0.378868	-1.08208	0.358491	0.901001	1	96	tags=19%, list=9%, signal=20%
MMF1_DAMP_SGA	26	-0.335462	-1.08032	0.363924	0.904877	1	292	tags=35%, list=27%, signal=47%
FKS1_BIND	21	-0.34494	-1.07982	0.358934	0.904623	1	82	tags=14%, list=8%, signal=15%
T1 PROPIONIC-VS-CONTROL_DN	105	-0.245091	-1.07928	0.34264	0.904567	1	211	tags=25%, list=20%, signal=28%
COX12_SGA	25	-0.332957	-1.07871	0.358814	0.904505	1	344	tags=48%, list=32%, signal=69%
PMT5_P5-571_DN	23	-0.339261	-1.07842	0.354687	0.903629	1	204	tags=35%, list=19%, signal=42%
OXIDOREDUCTASE ACTIVITY, ACTING ON CH-OH GROUP OF DONORS_MOL	24	-0.336022	-1.07809	0.370769	0.902935	1	139	tags=21%, list=13%, signal=23%
GIM5_BIND	33	-0.311663	-1.07718	0.341642	0.903975	1	252	tags=30%, list=24%, signal=38%
IMD3_BIND	19	-0.357627	-1.07543	0.357488	0.9077	1	582	tags=74%, list=55%, signal=160%
RPS7A_BIND	46	-0.289927	-1.07533	0.372715	0.906255	1	539	tags=54%, list=51%, signal=105%
IXR1_BIND	16	-0.375968	-1.07472	0.367508	0.906519	1	273	tags=44%, list=26%, signal=58%
RPS30B_SGA	16	-0.370501	-1.07414	0.360129	0.90662	1	584	tags=81%, list=55%, signal=178%
CDC37-TS_SGA	32	-0.314248	-1.07377	0.363363	0.906005	1	153	tags=22%, list=14%, signal=25%
TYE7-DOWN-HPX	86	-0.254891	-1.07365	0.339119	0.904619	1	296	tags=31%, list=28%, signal=40%
RPS22B_BIND	19	-0.353448	-1.07334	0.361769	0.903818	1	695	tags=100%, list=65%, signal=284%
CTF8_BIND	17	-0.365201	-1.07297	0.397436	0.903192	1	130	tags=24%, list=12%, signal=26%
DYN3_BIND	16	-0.371569	-1.0729	0.396525	0.901662	1	83	tags=19%, list=8%, signal=20%
KRE33_BIND	35	-0.304892	-1.07275	0.373626	0.900393	1	506	tags=54%, list=48%, signal=100%
YHC1-3_SGA	55	-0.276414	-1.07249	0.349162	0.899466	1	273	tags=27%, list=26%, signal=35%
MSS1_BIND	17	-0.359802	-1.07246	0.384244	0.897852	1	214	tags=35%, list=20%, signal=43%
DBP3_BIND	19	-0.350507	-1.07105	0.368341	0.900357	1	506	tags=53%, list=48%, signal=99%
SCS7_SGA	54	-0.276429	-1.07034	0.355337	0.900888	1	366	tags=39%, list=34%, signal=56%
MMR1_SGA	21	-0.343607	-1.07015	0.37084	0.899774	1	357	tags=43%, list=34%, signal=63%
UTP4_BIND	24	-0.328741	-1.06983	0.390895	0.899074	1	470	tags=58%, list=44%, signal=102%
SPE1_SGA	26	-0.326898	-1.0698	0.364286	0.897512	1	130	tags=23%, list=12%, signal=26%
RTG1-RTG3-BOUND- PEREZ	48	-0.28315	-1.06957	0.35605	0.896534	1	75	tags=10%, list=7%, signal=11%
BIOFILMBATCH_DN	52	-0.276075	-1.06655	0.364512	0.904014	1	315	tags=29%, list=30%, signal=39%
RPS22A_BIND	22	-0.342939	-1.06639	0.382353	0.902739	1	707	tags=100%, list=67%, signal=292%
PHB1_SGA	28	-0.320327	-1.06401	0.371341	0.908322	1	355	tags=43%, list=33%, signal=63%
NOP2_BIND	25	-0.328589	-1.0637	0.401826	0.907533	1	491	tags=48%, list=46%, signal=87%
RPS19B_SGA	36	-0.29914	-1.06369	0.367868	0.905883	1	130	tags=17%, list=12%, signal=18%
AUR1_DAMP_SGA	36	-0.302329	-1.06365	0.378378	0.904308	1	240	tags=31%, list=23%, signal=38%
SNF6-CHIP-30C	88	-0.253016	-1.06332	0.36	0.903663	1	101	tags=10%, list=10%, signal=10%
BAT1_SGA	23	-0.340092	-1.06264	0.38949	0.904153	1	149	tags=22%, list=14%, signal=25%
FRA1_SGA	22	-0.340382	-1.06236	0.3769	0.903315	1	262	tags=36%, list=25%, signal=47%
ARO2_SGA	31	-0.310234	-1.06174	0.355224	0.903504	1	336	tags=39%, list=32%, signal=55%
SLX9_SGA	27	-0.320059	-1.06143	0.376344	0.902778	1	339	tags=37%, list=32%, signal=53%
SKY1_BIND	26	-0.31998	-1.06126	0.381599	0.901632	1	258	tags=31%, list=24%, signal=40%
ION TRANSPORT_BIO	21	-0.344148	-1.06011	0.38756	0.903451	1	192	tags=29%, list=18%, signal=34%
RRP12_BIND	29	-0.318536	-1.05994	0.390719	0.902244	1	506	tags=52%, list=48%, signal=96%
STE24_BIND	27	-0.318659	-1.05957	0.380655	0.901768	1	83	tags=19%, list=8%, signal=20%
HTD2_SGA	26	-0.324621	-1.05892	0.376328	0.902236	1	403	tags=50%, list=38%, signal=79%
RRP15_DAMP_SGA	15	-0.382236	-1.05822	0.394654	0.902738	1	301	tags=47%, list=28%, signal=64%
VPS17_BIND	16	-0.370665	-1.05807	0.415064	0.901592	1	256	tags=38%, list=24%, signal=49%
NEO1-2_SGA	24	-0.324661	-1.05794	0.389423	0.900338	1	400	tags=50%, list=38%, signal=78%
MRP49_BIND	16	-0.370201	-1.05554	0.392628	0.905688	1	218	tags=38%, list=21%, signal=46%
FPR1_BIND	24	-0.326657	-1.05521	0.390127	0.904984	1	104	tags=17%, list=10%, signal=18%
SLX9_BIND	26	-0.316274	-1.05423	0.374415	0.906261	1	253	tags=27%, list=24%, signal=34%
VPS72_SGA	31	-0.315671	-1.05414	0.375951	0.904904	1	114	tags=19%, list=11%, signal=21%
TRP2_SGA	18	-0.354874	-1.0535	0.4	0.905238	1	214	tags=28%, list=20%, signal=34%
CSF1_BIND	38	-0.295374	-1.05163	0.375552	0.909381	1	42	tags=11%, list=4%, signal=11%
PMP3_SGA	35	-0.298992	-1.04941	0.380741	0.914623	1	358	tags=43%, list=34%, signal=62%
DPH5_SGA	20	-0.344598	-1.04929	0.386503	0.913346	1	214	tags=25%, list=20%, signal=31%
CKA2_BIND	29	-0.308721	-1.04911	0.411854	0.91227	1	151	tags=17%, list=14%, signal=20%
COG3-1_SGA	63	-0.264265	-1.04722	0.390449	0.916239	1	223	tags=21%, list=21%, signal=25%
CA21CHR1X16	22	-0.331264	-1.04675	0.39697	0.915937	1	45	tags=14%, list=4%, signal=14%
LSM3_DAMP_SGA	35	-0.298512	-1.04645	0.391239	0.915221	1	244	tags=26%, list=23%, signal=32%
EAF3_BIND	23	-0.331006	-1.04628	0.398413	0.91417	1	202	tags=26%, list=19%, signal=32%
RPS4A_BIND	37	-0.291051	-1.04627	0.410587	0.912594	1	483	tags=46%, list=45%, signal=81%
GCD11_BIND	20	-0.346725	-1.04616	0.418124	0.911267	1	103	tags=15%, list=10%, signal=16%
CBS2_SGA	21	-0.339013	-1.04558	0.40184	0.911391	1	340	tags=43%, list=32%, signal=62%
SUI2_BIND	22	-0.338933	-1.04549	0.416149	0.910062	1	266	tags=23%, list=25%, signal=30%
CAB1_DAMP_SGA	30	-0.315546	-1.04354	0.416283	0.914335	1	340	tags=37%, list=32%, signal=52%
PRP21-TS_SGA	19	-0.349853	-1.04308	0.390282	0.914122	1	113	tags=26%, list=11%, signal=29%
RPL16A_BIND	26	-0.315294	-1.04264	0.404088	0.913841	1	125	tags=15%, list=12%, signal=17%
CKB1_SGA	32	-0.30163	-1.04231	0.405819	0.913201	1	214	tags=28%, list=20%, signal=34%
BEM2_SGA	37	-0.291327	-1.04072	0.408832	0.916349	1	328	tags=46%, list=31%, signal=64%
SWI6_BIND	45	-0.282201	-1.04017	0.403026	0.916408	1	214	tags=24%, list=20%, signal=29%
CKS1_BIND	17	-0.352173	-1.0396	0.398754	0.916588	1	83	tags=18%, list=8%, signal=19%
SUR4_BIND	22	-0.331177	-1.03773	0.410377	0.9207	1	61	tags=14%, list=6%, signal=14%
ERG6_SGA	31	-0.304652	-1.03709	0.424925	0.921001	1	61	tags=10%, list=6%, signal=10%
PAA1_SGA	33	-0.295607	-1.0365	0.406393	0.92114	1	82	tags=15%, list=8%, signal=16%
RIM101_NRG1_UP	54	-0.268534	-1.03465	0.403709	0.924924	1	254	tags=33%, list=24%, signal=42%
TRANSFERASE ACTIVITY, TRANSFERRING ONE-CARBON GROUPS_MOL	17	-0.354666	-1.0341	0.437117	0.924919	1	466	tags=65%, list=44%, signal=113%
SER2_SGA	21	-0.330722	-1.034	0.432217	0.923672	1	3	tags=5%, list=0%, signal=5%
HAL5_SGA	15	-0.369006	-1.03158	0.414673	0.929317	1	151	tags=27%, list=14%, signal=31%
TMA23_SGA	18	-0.345076	-1.03088	0.427152	0.929771	1	572	tags=78%, list=54%, signal=166%
LEA1_BIND	27	-0.311338	-1.02903	0.417702	0.933572	1	221	tags=26%, list=21%, signal=32%
NCS6_BIND	16	-0.359365	-1.02901	0.416539	0.932041	1	371	tags=44%, list=35%, signal=66%
HTD2_BIND	18	-0.350264	-1.02847	0.438003	0.93208	1	203	tags=39%, list=19%, signal=47%
RAP1_DAMP_SGA	61	-0.264568	-1.02779	0.431818	0.932456	1	133	tags=16%, list=13%, signal=18%
ARC35-5_SGA	37	-0.291768	-1.02712	0.418705	0.932861	1	226	tags=27%, list=21%, signal=33%
ACS2_DAMP_SGA	16	-0.353372	-1.02682	0.445988	0.932148	1	400	tags=63%, list=38%, signal=99%
PET122_SGA	20	-0.335932	-1.02481	0.427286	0.936527	1	150	tags=25%, list=14%, signal=29%
IDH1_SGA	17	-0.348612	-1.02418	0.434921	0.936804	1	403	tags=47%, list=38%, signal=75%
TCO89_SGA	24	-0.316447	-1.02402	0.427259	0.935679	1	33	tags=8%, list=3%, signal=8%
CDC23-1_SGA	18	-0.340385	-1.02311	0.425665	0.936879	1	96	tags=22%, list=9%, signal=24%
PDE2_BIND	18	-0.340652	-1.02091	0.437403	0.941784	1	139	tags=17%, list=13%, signal=19%
BST1_SGA	25	-0.310543	-1.0203	0.454829	0.941906	1	162	tags=16%, list=15%, signal=18%
CDC73_SGA	32	-0.302552	-1.01978	0.431611	0.941785	1	301	tags=31%, list=28%, signal=42%
NPL3_BIND	25	-0.315046	-1.01965	0.417933	0.940555	1	346	tags=36%, list=33%, signal=52%
CA21CHR1X12	25	-0.317171	-1.01928	0.433384	0.94014	1	200	tags=28%, list=19%, signal=34%
RPL16A_SGA	17	-0.353314	-1.01866	0.463333	0.940394	1	252	tags=35%, list=24%, signal=46%
MMR1_BIND	17	-0.345558	-1.01728	0.428793	0.942737	1	182	tags=24%, list=17%, signal=28%
JNM1_SGA	38	-0.284546	-1.01692	0.447251	0.942101	1	135	tags=16%, list=13%, signal=17%
RPN11-14_SGA	40	-0.285935	-1.01574	0.422414	0.944062	1	186	tags=23%, list=17%, signal=26%
SAM37_BIND	20	-0.328976	-1.01419	0.449921	0.946863	1	180	tags=25%, list=17%, signal=30%
BRE5_SGA	47	-0.269032	-1.01361	0.4375	0.946923	1	186	tags=26%, list=17%, signal=30%
IDH2_SGA	20	-0.329169	-1.01275	0.445966	0.947806	1	415	tags=55%, list=39%, signal=89%
MEX67-TS5_SGA	16	-0.351265	-1.01121	0.45156	0.950783	1	3	tags=6%, list=0%, signal=6%
UAF30_BIND	16	-0.347815	-1.01072	0.440061	0.950574	1	258	tags=31%, list=24%, signal=41%
TRANSFERASE ACTIVITY_MOL	107	-0.23231	-1.01026	0.4375	0.950317	1	251	tags=25%, list=24%, signal=30%
SPC24-1_SGA	19	-0.32923	-1.01024	0.447619	0.948816	1	217	tags=32%, list=20%, signal=39%
NOC3_BIND	17	-0.344814	-1.01018	0.461059	0.94744	1	187	tags=24%, list=18%, signal=28%
ALG8_BIND	15	-0.361369	-1.01004	0.44713	0.946299	1	105	tags=20%, list=10%, signal=22%
YDR124W_SGA	15	-0.360472	-1.00995	0.469055	0.945055	1	124	tags=27%, list=12%, signal=30%
AFT2P_TFMOTIF	25	-0.317341	-1.009	0.451807	0.946266	1	352	tags=44%, list=33%, signal=64%
LSC2_SGA	15	-0.355189	-1.0082	0.458065	0.947028	1	340	tags=47%, list=32%, signal=68%
CA21CHRRX2	18	-0.34107	-1.00793	0.468606	0.946289	1	77	tags=17%, list=7%, signal=18%
SNO4_SGA	25	-0.308291	-1.00775	0.456418	0.945288	1	225	tags=24%, list=21%, signal=30%
PIH1_BIND	17	-0.342613	-1.00697	0.462733	0.945914	1	270	tags=35%, list=25%, signal=47%
GPI16_DAMP_SGA	24	-0.315564	-1.00635	0.463077	0.946088	1	119	tags=17%, list=11%, signal=18%
KRS1_DAMP_SGA	16	-0.345394	-1.00578	0.443366	0.946295	1	462	tags=50%, list=43%, signal=87%
NAM7_BIND	25	-0.311736	-1.00574	0.462481	0.944888	1	132	tags=16%, list=12%, signal=18%
SNT1_BIND	35	-0.282132	-1.00412	0.473227	0.948032	1	104	tags=14%, list=10%, signal=15%
URA7_SGA	15	-0.356454	-1.00281	0.465116	0.950226	1	161	tags=20%, list=15%, signal=23%
CDC73_BIND	47	-0.272005	-1.00226	0.451754	0.950332	1	312	tags=26%, list=29%, signal=35%
COP1-1_SGA	31	-0.294853	-1.00127	0.453623	0.951678	1	340	tags=45%, list=32%, signal=64%
DED1_BIND	29	-0.297304	-1.00097	0.464555	0.950926	1	505	tags=52%, list=48%, signal=96%
PRT1_BIND	15	-0.347969	-1.00084	0.450394	0.94979	1	343	tags=33%, list=32%, signal=49%
VPS51_BIND	24	-0.317221	-1.00057	0.465875	0.949004	1	133	tags=21%, list=13%, signal=23%
DIP2_BIND	18	-0.333749	-1.00052	0.474843	0.947612	1	470	tags=56%, list=44%, signal=98%
PGA3_DAMP_SGA	37	-0.283732	-1.00049	0.458636	0.946198	1	344	tags=38%, list=32%, signal=54%
HTA2_BIND	22	-0.316973	-1.00013	0.447574	0.945793	1	112	tags=18%, list=11%, signal=20%
SSO2_BIND	20	-0.332774	-0.997987	0.467717	0.950415	1	19	tags=10%, list=2%, signal=10%
PAT1_SGA	53	-0.257696	-0.996678	0.456671	0.952581	1	263	tags=26%, list=25%, signal=33%
NUCLEAR TRANSPORT_BIO	22	-0.316932	-0.996588	0.46571	0.951307	1	446	tags=45%, list=42%, signal=77%
KRE11_SGA	18	-0.332573	-0.995867	0.458915	0.951844	1	105	tags=17%, list=10%, signal=18%
WHITE_UP	24	-0.305141	-0.99532	0.482059	0.951768	1	69	tags=13%, list=6%, signal=13%
SRP40_SGA	15	-0.354315	-0.994966	0.466877	0.951233	1	529	tags=80%, list=50%, signal=157%
RPN4_SGA	30	-0.288324	-0.992599	0.475038	0.956323	1	411	tags=47%, list=39%, signal=74%
NOP58_BIND	20	-0.326419	-0.992251	0.48452	0.955835	1	536	tags=60%, list=50%, signal=119%
TYE7-DOWN	40	-0.276733	-0.991757	0.47178	0.955812	1	251	tags=25%, list=24%, signal=31%
ARL3_SGA	25	-0.303318	-0.991155	0.48913	0.955997	1	166	tags=24%, list=16%, signal=28%
RPA14_BIND	23	-0.310774	-0.9864	0.450949	0.967829	1	214	tags=30%, list=20%, signal=37%
SWD3_BIND	27	-0.294988	-0.986329	0.490137	0.966494	1	466	tags=52%, list=44%, signal=90%
ATP10_SGA	24	-0.303644	-0.984994	0.487055	0.968695	1	354	tags=46%, list=33%, signal=67%
VPS1_BIND	17	-0.336635	-0.98443	0.490354	0.968725	1	256	tags=35%, list=24%, signal=46%
CELL CYCLE PROCESS_BIO	26	-0.304589	-0.984342	0.469673	0.967476	1	198	tags=31%, list=19%, signal=37%
UBP8_SGA	15	-0.343553	-0.981984	0.47327	0.972712	1	340	tags=53%, list=32%, signal=77%
RPL17A_BIND	28	-0.294508	-0.981261	0.493711	0.973318	1	584	tags=64%, list=55%, signal=139%
MDM31_SGA	17	-0.333918	-0.980288	0.477379	0.974483	1	248	tags=29%, list=23%, signal=38%
NUT1_BIND	22	-0.304571	-0.977605	0.493314	0.980598	1	180	tags=27%, list=17%, signal=32%
TOF1_SGA	24	-0.303844	-0.977327	0.489954	0.979928	1	301	tags=29%, list=28%, signal=40%
CBF2-1_SGA	16	-0.328158	-0.976702	0.469419	0.98021	1	165	tags=25%, list=16%, signal=29%
RPL20B_BIND	22	-0.312419	-0.976658	0.496785	0.978806	1	15	tags=5%, list=1%, signal=5%
RPS16A_SGA	17	-0.338637	-0.97479	0.519936	0.982523	1	223	tags=24%, list=21%, signal=29%
SPT4_BIND	17	-0.3306	-0.974197	0.494523	0.982544	1	161	tags=24%, list=15%, signal=27%
MON1_BIND	15	-0.34471	-0.973305	0.506494	0.983561	1	202	tags=33%, list=19%, signal=41%
UFD1-2_SGA	21	-0.311879	-0.972878	0.497623	0.983207	1	314	tags=43%, list=30%, signal=60%
DFG16_SGA	30	-0.285999	-0.972682	0.508475	0.98227	1	354	tags=43%, list=33%, signal=63%
RIM8_SGA	29	-0.290837	-0.972378	0.487332	0.981591	1	81	tags=14%, list=8%, signal=15%
CDC5_2H_UP	16	-0.334371	-0.972291	0.506601	0.980347	1	188	tags=31%, list=18%, signal=37%
ENP1_BIND	15	-0.338951	-0.970207	0.500821	0.984617	1	492	tags=60%, list=46%, signal=110%
TRF5_SGA	19	-0.319983	-0.969983	0.499227	0.983768	1	252	tags=32%, list=24%, signal=41%
VMA21_BIND	18	-0.326513	-0.968443	0.506349	0.986523	1	328	tags=39%, list=31%, signal=55%
PDA1_SGA	20	-0.318358	-0.968017	0.482655	0.986231	1	149	tags=25%, list=14%, signal=29%
DOT1_BIND	20	-0.315469	-0.966923	0.521212	0.987847	1	147	tags=25%, list=14%, signal=28%
LIP2_SGA	25	-0.298179	-0.965904	0.512012	0.989096	1	161	tags=24%, list=15%, signal=28%
BCK1_SGA	22	-0.303097	-0.965811	0.495385	0.987877	1	149	tags=23%, list=14%, signal=26%
RIM9_SGA	20	-0.316366	-0.965781	0.494799	0.98649	1	129	tags=20%, list=12%, signal=22%
ACTIN CYTOSKELETON_CEL	16	-0.335405	-0.96383	0.491987	0.990372	1	100	tags=19%, list=9%, signal=20%
SLT2_SGA	37	-0.267872	-0.963104	0.537651	0.990918	1	223	tags=27%, list=21%, signal=33%
RPL13B_BIND	20	-0.313243	-0.963086	0.511041	0.989503	1	339	tags=25%, list=32%, signal=36%
SPF1_SGA	28	-0.28549	-0.963066	0.519201	0.988085	1	33	tags=11%, list=3%, signal=11%
GRE3_SGA	30	-0.288542	-0.962799	0.517544	0.987359	1	112	tags=20%, list=11%, signal=22%
CBF5_BIND	23	-0.300759	-0.962776	0.515625	0.985953	1	535	tags=57%, list=50%, signal=111%
HLJ1_BIND	15	-0.343012	-0.962082	0.517665	0.986396	1	247	tags=33%, list=23%, signal=43%
VRP1_BIND	29	-0.279239	-0.961626	0.507576	0.986208	1	180	tags=21%, list=17%, signal=24%
PTH1_BIND	15	-0.343866	-0.961508	0.52657	0.985086	1	114	tags=20%, list=11%, signal=22%
DCC1_BIND	23	-0.296447	-0.960883	0.522152	0.985335	1	253	tags=35%, list=24%, signal=45%
BNI1_SGA	16	-0.328527	-0.960771	0.508972	0.984192	1	226	tags=31%, list=21%, signal=39%
ABD1-5_SGA	49	-0.253509	-0.95996	0.532374	0.984959	1	186	tags=22%, list=17%, signal=26%
YFH1_DAMP_SGA	46	-0.256271	-0.959863	0.537037	0.983812	1	150	tags=15%, list=14%, signal=17%
QRI1-TS1_SGA	16	-0.328103	-0.958916	0.50234	0.984924	1	473	tags=56%, list=44%, signal=100%
RAD6_BIND	15	-0.338684	-0.958776	0.497585	0.983857	1	151	tags=20%, list=14%, signal=23%
MED8-51_SGA	30	-0.281201	-0.958409	0.522059	0.983436	1	186	tags=27%, list=17%, signal=31%
RIP1_SGA	23	-0.304278	-0.957778	0.500775	0.983753	1	186	tags=30%, list=17%, signal=36%
DEG1_BIND	34	-0.276738	-0.957663	0.522124	0.982631	1	253	tags=26%, list=24%, signal=34%
TEL2-7_SGA	20	-0.314432	-0.957396	0.522979	0.981963	1	257	tags=30%, list=24%, signal=39%
NUCLEAR EXPORT_BIO	18	-0.319298	-0.957323	0.509375	0.98074	1	446	tags=50%, list=42%, signal=85%
UTP13_BIND	19	-0.312198	-0.955549	0.519501	0.984013	1	506	tags=63%, list=48%, signal=118%
CHA4P_TFMOTIF	110	-0.221215	-0.955541	0.547493	0.98262	1	296	tags=31%, list=28%, signal=38%
YKL033W-A_SGA	16	-0.333839	-0.954774	0.522095	0.983232	1	129	tags=25%, list=12%, signal=28%
RPL1A_BIND	25	-0.294923	-0.953194	0.529874	0.986004	1	554	tags=56%, list=52%, signal=114%
GYP6_SGA	31	-0.287468	-0.952533	0.536842	0.986368	1	324	tags=39%, list=30%, signal=54%
ATG3_BIND	16	-0.336134	-0.949336	0.555195	0.993299	1	4	tags=6%, list=0%, signal=6%
URM1_SGA	19	-0.313994	-0.948409	0.509317	0.994429	1	257	tags=26%, list=24%, signal=34%
CA21CHR2X4	21	-0.30349	-0.948047	0.53429	0.993935	1	208	tags=29%, list=20%, signal=35%
QNQ1_SGA	17	-0.318507	-0.947785	0.551459	0.993202	1	103	tags=18%, list=10%, signal=19%
ATP5_SGA	15	-0.327864	-0.947221	0.519417	0.993275	1	340	tags=47%, list=32%, signal=68%
RFC5-1_SGA	26	-0.284283	-0.946827	0.550232	0.992917	1	364	tags=42%, list=34%, signal=63%
GCN5_SGA	46	-0.252638	-0.946074	0.570579	0.993537	1	135	tags=17%, list=13%, signal=19%
RPL7B_BIND	34	-0.271754	-0.945568	0.549337	0.993446	1	339	tags=21%, list=32%, signal=29%
SSU72-2_SGA	18	-0.311481	-0.945465	0.531002	0.992322	1	252	tags=33%, list=24%, signal=43%
SMI1_SGA	36	-0.269482	-0.944791	0.557037	0.992695	1	166	tags=22%, list=16%, signal=25%
MIA40_DAMP_SGA	19	-0.318008	-0.944767	0.542453	0.991325	1	324	tags=47%, list=30%, signal=67%
ATG11_SGA	19	-0.308103	-0.943495	0.545597	0.993322	1	217	tags=32%, list=20%, signal=39%
HELICASE ACTIVITY_MOL	15	-0.338636	-0.942284	0.548701	0.995107	1	564	tags=73%, list=53%, signal=154%
ELP4_BIND	28	-0.283711	-0.941211	0.562893	0.996564	1	141	tags=18%, list=13%, signal=20%
SUS1_SGA	39	-0.255935	-0.940527	0.571635	0.996937	1	149	tags=18%, list=14%, signal=20%
MON2_BIND	17	-0.318889	-0.938635	0.537618	1	1	83	tags=18%, list=8%, signal=19%
COX12_BIND	18	-0.315997	-0.938491	0.557427	0.999461	1	287	tags=33%, list=27%, signal=45%
BST1_BIND	20	-0.302387	-0.937275	0.53775	1	1	105	tags=15%, list=10%, signal=16%
RPL5_BIND	37	-0.262487	-0.937209	0.539359	0.999964	1	355	tags=32%, list=33%, signal=47%
EMG1_BIND	18	-0.3121	-0.936898	0.542587	0.999404	1	483	tags=56%, list=45%, signal=100%
ARD1_SGA	24	-0.287334	-0.936682	0.542683	0.998496	1	141	tags=17%, list=13%, signal=19%
IRS4_SGA	15	-0.330087	-0.934582	0.555725	1	1	105	tags=20%, list=10%, signal=22%
CA21CHR7X2	24	-0.285872	-0.934499	0.552906	1	1	160	tags=21%, list=15%, signal=24%
RPL8B_BIND	38	-0.254773	-0.93324	0.568345	1	1	223	tags=16%, list=21%, signal=19%
NOP56_BIND	31	-0.271425	-0.932806	0.542569	1	1	535	tags=58%, list=50%, signal=113%
CA21CHR4X3	16	-0.328725	-0.932185	0.549051	1	1	265	tags=44%, list=25%, signal=57%
CA21CHRRX9	25	-0.284852	-0.931546	0.555906	1	1	228	tags=32%, list=21%, signal=40%
AEROBIC RESPIRATION_BIO	21	-0.296586	-0.930661	0.551447	1	1	438	tags=57%, list=41%, signal=95%
COFACTOR METABOLIC PROCESS_BIO	36	-0.263721	-0.930132	0.581465	1	1	180	tags=25%, list=17%, signal=29%
ENERGY DERIVATION BY OXIDATION OF ORGANIC COMPOUNDS_BIO	33	-0.261451	-0.929633	0.582946	1	1	34	tags=9%, list=3%, signal=9%
PUF6_BIND	33	-0.263025	-0.928903	0.557018	1	1	290	tags=27%, list=27%, signal=36%
CA21CHR1X6	21	-0.302724	-0.927433	0.556942	1	1	241	tags=33%, list=23%, signal=42%
BTS1_BIND	36	-0.263333	-0.926144	0.590308	1	1	273	tags=31%, list=26%, signal=40%
SEC61-2_SGA	29	-0.276306	-0.926069	0.559271	1	1	151	tags=28%, list=14%, signal=31%
SEC66_SGA	36	-0.263868	-0.925667	0.580175	1	1	223	tags=28%, list=21%, signal=34%
CA21CHR1X13	33	-0.267805	-0.924636	0.579646	1	1	200	tags=21%, list=19%, signal=25%
CHO2_BIND	28	-0.278537	-0.921818	0.575712	1	1	139	tags=21%, list=13%, signal=24%
IOC4_SGA	20	-0.298543	-0.921592	0.562404	1	1	64	tags=10%, list=6%, signal=10%
LATE BIOFILM_UP	20	-0.29999	-0.921352	0.555205	1	1	72	tags=10%, list=7%, signal=11%
SGF11_SGA	32	-0.266828	-0.920873	0.559505	1	1	129	tags=22%, list=12%, signal=24%
ENDOPLASMIC RETICULUM PART_CEL	15	-0.322092	-0.920578	0.549839	1	1	128	tags=20%, list=12%, signal=22%
CAF4_SGA	17	-0.311162	-0.920117	0.576606	1	1	149	tags=24%, list=14%, signal=27%
UBP14_SGA	24	-0.284919	-0.919823	0.566717	1	1	143	tags=21%, list=13%, signal=24%
CA21CHR2X2	22	-0.291303	-0.919732	0.568182	1	1	230	tags=36%, list=22%, signal=45%
CATION TRANSPORTER ACTIVITY_MOL	20	-0.305235	-0.919515	0.573416	1	1	36	tags=10%, list=3%, signal=10%
CA21CHR5X2	23	-0.291049	-0.917857	0.601286	1	1	366	tags=48%, list=34%, signal=71%
RTT103_SGA	27	-0.279267	-0.917702	0.585627	1	1	159	tags=26%, list=15%, signal=30%
KIN4_SGA	18	-0.307912	-0.916741	0.569423	1	1	129	tags=22%, list=12%, signal=25%
DST1_BIND	30	-0.27111	-0.913979	0.594074	1	1	247	tags=27%, list=23%, signal=34%
SCS2_SGA	16	-0.317198	-0.913799	0.569282	1	1	473	tags=69%, list=44%, signal=122%
GIM4_SGA	43	-0.245872	-0.913655	0.591631	1	1	96	tags=12%, list=9%, signal=12%
RNA TRANSPORT_BIO	17	-0.302862	-0.910387	0.58797	1	1	541	tags=65%, list=51%, signal=130%
UBA4_BIND	16	-0.315245	-0.910363	0.580495	1	1	214	tags=25%, list=20%, signal=31%
ION TRANSPORTER ACTIVITY_MOL	23	-0.289334	-0.909695	0.594384	1	1	36	tags=9%, list=3%, signal=9%
RPL8A_SGA	21	-0.289706	-0.909085	0.592537	1	1	462	tags=43%, list=43%, signal=74%
RTC3_SGA	16	-0.30712	-0.908962	0.58758	1	1	347	tags=50%, list=33%, signal=73%
RAS2_SGA	17	-0.313767	-0.908421	0.577508	1	1	30	tags=12%, list=3%, signal=12%
NAN1_BIND	27	-0.273871	-0.908251	0.575988	1	1	536	tags=59%, list=50%, signal=116%
ASC1_BIND	57	-0.23456	-0.907243	0.625181	1	1	223	tags=16%, list=21%, signal=19%
ETR1_SGA	18	-0.301068	-0.907049	0.573209	1	1	262	tags=33%, list=25%, signal=43%
PMT4_CAP4-216_UP	27	-0.2681	-0.906875	0.6	1	1	436	tags=44%, list=41%, signal=73%
PRP22-1_SGA	38	-0.2519	-0.906268	0.615734	1	1	223	tags=26%, list=21%, signal=32%
RGD1_SGA	26	-0.270535	-0.90505	0.585827	1	1	248	tags=35%, list=23%, signal=44%
INO2_SGA	36	-0.255605	-0.905038	0.607504	1	1	344	tags=44%, list=32%, signal=63%
QCR8_SGA	67	-0.224839	-0.90446	0.612245	1	1	355	tags=34%, list=33%, signal=48%
NUCLEIC ACID TRANSPORT_BIO	17	-0.302862	-0.904289	0.576169	1	1	541	tags=65%, list=51%, signal=130%
RLF2_SGA	15	-0.32254	-0.903415	0.589744	1	1	186	tags=20%, list=17%, signal=24%
WHI2_BIND	17	-0.317161	-0.901272	0.611374	1	1	132	tags=18%, list=12%, signal=20%
SNF1_SGA	25	-0.275788	-0.900309	0.603344	1	1	324	tags=40%, list=30%, signal=56%
PKC1-4_SGA	48	-0.236392	-0.899652	0.617852	1	1	186	tags=23%, list=17%, signal=27%
VMA21_SGA	15	-0.317454	-0.899448	0.604688	1	1	402	tags=53%, list=38%, signal=85%
HSP30_SGA	17	-0.313191	-0.899198	0.585987	1	1	314	tags=35%, list=30%, signal=49%
TBF1_TF	35	-0.255483	-0.898568	0.623688	1	1	591	tags=66%, list=56%, signal=143%
EXO70_SGA	25	-0.280845	-0.897697	0.585253	1	1	252	tags=32%, list=24%, signal=41%
CELLULAR RESPIRATION_BIO	21	-0.296586	-0.897088	0.607419	1	1	438	tags=57%, list=41%, signal=95%
RFC3_DAMP_SGA	15	-0.318782	-0.896804	0.59772	1	1	501	tags=67%, list=47%, signal=124%
CELLULAR COMPONENT ASSEMBLY_BIO	66	-0.223766	-0.896339	0.642659	1	1	219	tags=21%, list=21%, signal=25%
SRO9_BIND	27	-0.271259	-0.895548	0.611783	1	1	83	tags=11%, list=8%, signal=12%
QCR9_SGA	26	-0.274302	-0.895093	0.632353	1	1	340	tags=42%, list=32%, signal=61%
STU2-12_SGA	19	-0.300653	-0.894582	0.611465	1	1	325	tags=37%, list=31%, signal=52%
ESTABLISHMENT OF RNA LOCALIZATION_BIO	17	-0.302862	-0.893745	0.60916	1	1	541	tags=65%, list=51%, signal=130%
RPL13A_BIND	20	-0.293597	-0.892705	0.618098	1	1	132	tags=15%, list=12%, signal=17%
ISW2_SGA	24	-0.276556	-0.891606	0.62963	1	1	340	tags=46%, list=32%, signal=66%
PEX19_BIND	15	-0.314277	-0.890871	0.6048	1	1	325	tags=47%, list=31%, signal=66%
DOA1_SGA	37	-0.24558	-0.890646	0.626667	1	1	366	tags=32%, list=34%, signal=48%
HPC2_BIND	20	-0.292534	-0.889545	0.615147	1	1	270	tags=35%, list=25%, signal=46%
CA21CHR2X1	21	-0.292519	-0.889431	0.637931	1	1	375	tags=57%, list=35%, signal=87%
SOF1_BIND	19	-0.295613	-0.888895	0.603476	1	1	470	tags=53%, list=44%, signal=93%
TSC11-1_SGA	22	-0.284968	-0.888712	0.625378	1	1	206	tags=23%, list=19%, signal=28%
RNA EXPORT FROM NUCLEUS_BIO	17	-0.302862	-0.888544	0.602804	1	1	541	tags=65%, list=51%, signal=130%
RPL36B_BIND	25	-0.271799	-0.888458	0.626506	1	1	355	tags=36%, list=33%, signal=53%
IKI3_SGA	23	-0.278649	-0.887464	0.595712	1	1	357	tags=43%, list=34%, signal=64%
YJR120W_SGA	33	-0.255803	-0.886687	0.660432	1	1	339	tags=33%, list=32%, signal=47%
CHROMOSOME ORGANIZATION AND BIOGENESIS (SENSU EUKARYOTA)_BIO	23	-0.276014	-0.886639	0.639445	1	1	320	tags=39%, list=30%, signal=55%
NOC4_BIND	29	-0.257622	-0.886596	0.62591	1	1	536	tags=55%, list=50%, signal=108%
RPL9A_BIND	15	-0.309605	-0.886539	0.627483	1	1	223	tags=20%, list=21%, signal=25%
UBC4_BIND	32	-0.2586	-0.886324	0.630117	1	1	186	tags=19%, list=17%, signal=22%
DEP1_BIND	48	-0.239959	-0.885953	0.651989	1	1	318	tags=31%, list=30%, signal=43%
MSC1_SGA	73	-0.218587	-0.885747	0.676316	1	1	262	tags=26%, list=25%, signal=32%
YLR301W_SGA	18	-0.300171	-0.885687	0.617089	1	1	354	tags=44%, list=33%, signal=66%
BCK1_BIND	27	-0.269323	-0.885427	0.618421	1	1	19	tags=7%, list=2%, signal=7%
NUCLEOBASE, NUCLEOSIDE, NUCLEOTIDE AND NUCLEIC ACID TRANSPORT_BIO	17	-0.302862	-0.884547	0.621835	1	1	541	tags=65%, list=51%, signal=130%
ELP2_SGA	28	-0.268091	-0.884173	0.627093	1	1	133	tags=18%, list=13%, signal=20%
XRS2_BIND	20	-0.284393	-0.883143	0.618759	1	1	130	tags=20%, list=12%, signal=22%
NUCLEOPLASM PART_CEL	27	-0.268018	-0.881585	0.646177	1	1	357	tags=41%, list=34%, signal=60%
CYK3_SGA	27	-0.266754	-0.880254	0.634703	1	1	82	tags=15%, list=8%, signal=16%
ALG9_SGA	54	-0.233227	-0.880127	0.654979	1	1	364	tags=41%, list=34%, signal=59%
NUP120_SGA	25	-0.270435	-0.879266	0.647059	1	1	273	tags=36%, list=26%, signal=47%
WHI2_SGA	37	-0.249766	-0.879252	0.61396	1	1	108	tags=16%, list=10%, signal=17%
TGS1_BIND	21	-0.280117	-0.878517	0.610606	1	1	28	tags=10%, list=3%, signal=10%
CA21CHR7X1	20	-0.287547	-0.878492	0.63622	1	1	357	tags=40%, list=34%, signal=59%
YOR228C_SGA	15	-0.302056	-0.878241	0.64	1	1	225	tags=27%, list=21%, signal=33%
VPS9_SGA	40	-0.241292	-0.877988	0.652493	1	1	151	tags=20%, list=14%, signal=22%
RPS0B_BIND	20	-0.28514	-0.876926	0.647328	1	1	139	tags=20%, list=13%, signal=23%
SSA2_BIND	26	-0.265547	-0.876694	0.64812	1	1	353	tags=35%, list=33%, signal=51%
RPS25A_SGA	15	-0.303834	-0.875587	0.605055	1	1	133	tags=20%, list=13%, signal=23%
COENZYME METABOLIC PROCESS_BIO	32	-0.255394	-0.874752	0.655172	1	1	180	tags=25%, list=17%, signal=29%
CA21CHRRX11	17	-0.297768	-0.873687	0.6288	1	1	234	tags=29%, list=22%, signal=37%
SKN7_SGA	16	-0.304308	-0.873529	0.622611	1	1	149	tags=19%, list=14%, signal=21%
PTC1_SGA	33	-0.253584	-0.873078	0.648766	1	1	273	tags=36%, list=26%, signal=47%
CIN8_BIND	19	-0.290102	-0.86942	0.633027	1	1	252	tags=32%, list=24%, signal=41%
SUP35_BIND	15	-0.304727	-0.869177	0.632588	1	1	103	tags=13%, list=10%, signal=15%
SIT4_HYPHAE_DN	29	-0.258428	-0.868758	0.664212	1	1	502	tags=55%, list=47%, signal=102%
LIP2_BIND	17	-0.297083	-0.867873	0.669355	1	1	443	tags=47%, list=42%, signal=79%
RPS13_BIND	19	-0.286948	-0.867565	0.641935	1	1	470	tags=47%, list=44%, signal=83%
CHROMOSOME ORGANIZATION AND BIOGENESIS_BIO	23	-0.276014	-0.867419	0.686335	1	1	320	tags=39%, list=30%, signal=55%
SRP40_BIND	19	-0.287346	-0.867408	0.628931	1	1	446	tags=47%, list=42%, signal=80%
SUB1_BIND	19	-0.286824	-0.867252	0.645768	1	1	270	tags=32%, list=25%, signal=42%
HOG1_SGA	18	-0.294268	-0.867106	0.639062	1	1	159	tags=22%, list=15%, signal=26%
ARO1_SGA	38	-0.240625	-0.867054	0.654232	1	1	252	tags=26%, list=24%, signal=33%
COX7_SGA	20	-0.28337	-0.867006	0.652582	1	1	340	tags=40%, list=32%, signal=58%
ISC1_BIND	16	-0.299037	-0.867002	0.648986	1	1	357	tags=50%, list=34%, signal=74%
CA21CHR4X7	21	-0.283839	-0.866244	0.628205	1	1	397	tags=57%, list=37%, signal=89%
PSE1-41_SGA	15	-0.30686	-0.865781	0.65142	1	1	96	tags=13%, list=9%, signal=14%
SSA1_BIND	61	-0.219251	-0.865243	0.688011	1	1	151	tags=15%, list=14%, signal=16%
CDC50_SGA	17	-0.291203	-0.864911	0.64918	1	1	206	tags=35%, list=19%, signal=43%
VIP1_SGA	18	-0.292164	-0.864545	0.645161	1	1	262	tags=44%, list=25%, signal=58%
PCF11-TS2_SGA	15	-0.305376	-0.862894	0.662461	1	1	71	tags=13%, list=7%, signal=14%
BUD31_BIND	29	-0.254476	-0.862319	0.6546	1	1	19	tags=7%, list=2%, signal=7%
NUCLEOPLASM_CEL	28	-0.257678	-0.862051	0.678092	1	1	497	tags=61%, list=47%, signal=111%
CA21CHR1X2	25	-0.263533	-0.861606	0.66369	1	1	285	tags=36%, list=27%, signal=48%
YEF3_BIND	16	-0.301815	-0.861163	0.658023	1	1	748	tags=100%, list=70%, signal=332%
PIL1_SGA	16	-0.293552	-0.860916	0.6352	1	1	262	tags=31%, list=25%, signal=41%
EFT1_BIND	19	-0.285124	-0.860336	0.637329	1	1	119	tags=16%, list=11%, signal=17%
GPI8-TS_SGA	45	-0.226876	-0.860116	0.700719	1	1	328	tags=31%, list=31%, signal=43%
NCS2_BIND	19	-0.280808	-0.85912	0.654434	1	1	244	tags=26%, list=23%, signal=34%
RTG1_SGA	29	-0.255672	-0.858377	0.660209	1	1	130	tags=17%, list=12%, signal=19%
CHO2_SGA	59	-0.21914	-0.858209	0.721358	1	1	355	tags=39%, list=33%, signal=55%
NUP2_BIND	16	-0.302794	-0.85818	0.642302	1	1	446	tags=50%, list=42%, signal=85%
GET1_SGA	39	-0.238785	-0.857424	0.686695	1	1	357	tags=41%, list=34%, signal=60%
TSA1_BIND	21	-0.275756	-0.85741	0.681677	1	1	141	tags=19%, list=13%, signal=22%
CTI6_SGA	30	-0.251859	-0.855607	0.685075	1	1	143	tags=17%, list=13%, signal=19%
SST2_SGA	27	-0.256738	-0.854091	0.66716	1	1	257	tags=30%, list=24%, signal=38%
VMA9_SGA	61	-0.221743	-0.85316	0.716851	1	1	201	tags=21%, list=19%, signal=25%
GWT1-20_SGA	39	-0.238568	-0.852406	0.684211	1	1	184	tags=18%, list=17%, signal=21%
COG6_SGA	21	-0.271386	-0.851277	0.664567	1	1	119	tags=19%, list=11%, signal=21%
NMD2_SGA	21	-0.277384	-0.850656	0.661905	1	1	214	tags=29%, list=20%, signal=35%
HAP3_SGA	26	-0.25822	-0.850255	0.668196	1	1	186	tags=23%, list=17%, signal=27%
FHL1_TF	37	-0.234022	-0.849759	0.706304	1	1	539	tags=51%, list=51%, signal=101%
SWI4_SGA	30	-0.25188	-0.848185	0.693114	1	1	25	tags=10%, list=2%, signal=10%
CARRIER ACTIVITY_MOL	21	-0.274985	-0.847776	0.664516	1	1	118	tags=19%, list=11%, signal=21%
PTH1_SGA	41	-0.233172	-0.847763	0.708628	1	1	363	tags=39%, list=34%, signal=57%
CELL CYCLE_BIO	28	-0.255335	-0.847664	0.690513	1	1	198	tags=29%, list=19%, signal=34%
DBP7_BIND	23	-0.26833	-0.84742	0.676471	1	1	114	tags=13%, list=11%, signal=14%
HTZ1_BIND	40	-0.235523	-0.846739	0.722059	1	1	112	tags=15%, list=11%, signal=16%
CA21CHR4X6	20	-0.277301	-0.845419	0.683582	1	1	211	tags=25%, list=20%, signal=31%
UBI4_BIND	51	-0.221101	-0.844843	0.714906	1	1	256	tags=22%, list=24%, signal=27%
SLM3_BIND	19	-0.277076	-0.844754	0.676236	1	1	375	tags=42%, list=35%, signal=64%
MDM12_BIND	26	-0.258244	-0.84383	0.683507	1	1	104	tags=15%, list=10%, signal=17%
TPM1_BIND	20	-0.277055	-0.843055	0.674735	1	1	202	tags=20%, list=19%, signal=24%
LIPID BIOSYNTHETIC PROCESS_BIO	16	-0.293499	-0.842652	0.648649	1	1	128	tags=19%, list=12%, signal=21%
SEC63-1_SGA	48	-0.223075	-0.838895	0.723849	1	1	357	tags=42%, list=34%, signal=60%
WBP1-2_SGA	37	-0.239954	-0.838608	0.742313	1	1	26	tags=8%, list=2%, signal=8%
SAP30_BIND	37	-0.234345	-0.838604	0.702096	1	1	262	tags=24%, list=25%, signal=31%
CLA4_BIND	22	-0.266849	-0.837833	0.674277	1	1	133	tags=18%, list=13%, signal=20%
HAP1P_TFMOTIF	28	-0.248129	-0.835192	0.688473	1	1	159	tags=18%, list=15%, signal=20%
RRP6_SGA	15	-0.290872	-0.834137	0.669231	1	1	30	tags=7%, list=3%, signal=7%
RIC1_BIND	65	-0.210132	-0.833754	0.734551	1	1	273	tags=26%, list=26%, signal=33%
PHO4-UP	142	-0.184433	-0.833748	0.804162	1	1	302	tags=30%, list=28%, signal=36%
FYV10_BIND	20	-0.274571	-0.833211	0.693271	1	1	159	tags=20%, list=15%, signal=23%
RAD27_BIND	21	-0.265611	-0.831523	0.675507	1	1	357	tags=43%, list=34%, signal=63%
HHT2_BIND	19	-0.27845	-0.831063	0.692308	1	1	297	tags=32%, list=28%, signal=43%
CA21CHR1X1	26	-0.254684	-0.829258	0.709428	1	1	328	tags=42%, list=31%, signal=60%
GLE2_SGA	22	-0.267952	-0.82902	0.684458	1	1	119	tags=18%, list=11%, signal=20%
CA21CHRRX12	25	-0.254875	-0.825718	0.708207	1	1	96	tags=16%, list=9%, signal=17%
STB5_BIND	24	-0.255511	-0.82482	0.730539	1	1	252	tags=25%, list=24%, signal=32%
RPN4_BIND	45	-0.218011	-0.824785	0.723122	1	1	270	tags=27%, list=25%, signal=34%
SHP1_SGA	48	-0.219363	-0.824479	0.743989	1	1	129	tags=17%, list=12%, signal=18%
GLC7_DAMP_SGA	52	-0.216975	-0.824312	0.74435	1	1	272	tags=29%, list=26%, signal=37%
SLX5_BIND	41	-0.224122	-0.823944	0.748503	1	1	297	tags=29%, list=28%, signal=39%
SEC22_BIND	39	-0.226669	-0.823074	0.723032	1	1	202	tags=23%, list=19%, signal=27%
DYN1_SGA	26	-0.251336	-0.822347	0.703077	1	1	19	tags=8%, list=2%, signal=8%
SKI3_BIND	22	-0.259323	-0.822143	0.729102	1	1	478	tags=45%, list=45%, signal=81%
RPS7B_BIND	19	-0.268983	-0.821552	0.720893	1	1	223	tags=16%, list=21%, signal=20%
HXK2_BIND	17	-0.27516	-0.82091	0.692187	1	1	83	tags=12%, list=8%, signal=13%
MET6_SGA	15	-0.286001	-0.820828	0.707563	1	1	340	tags=47%, list=32%, signal=68%
VPS29_SGA	17	-0.277023	-0.820068	0.709677	1	1	186	tags=29%, list=17%, signal=35%
DED81_DAMP_SGA	21	-0.266068	-0.819471	0.716108	1	1	501	tags=57%, list=47%, signal=106%
CPR7_SGA	19	-0.273144	-0.81918	0.714724	1	1	130	tags=26%, list=12%, signal=29%
SIF2_BIND	28	-0.243587	-0.81868	0.738245	1	1	446	tags=50%, list=42%, signal=84%
GTR1_BIND	22	-0.259165	-0.817661	0.721712	1	1	202	tags=23%, list=19%, signal=27%
RMD1_SGA	23	-0.258321	-0.817518	0.728296	1	1	324	tags=30%, list=30%, signal=43%
VMA5_SGA	19	-0.271524	-0.816626	0.723005	1	1	328	tags=42%, list=31%, signal=60%
BOS1-1_SGA	55	-0.212364	-0.816247	0.765449	1	1	120	tags=13%, list=11%, signal=14%
LDB18_BIND	18	-0.272217	-0.815469	0.69863	1	1	462	tags=50%, list=43%, signal=87%
RPL4B_BIND	20	-0.268061	-0.814937	0.686364	1	1	535	tags=65%, list=50%, signal=128%
CDC37-1_SGA	28	-0.242433	-0.814465	0.733529	1	1	186	tags=18%, list=17%, signal=21%
SGN1_SGA	20	-0.259955	-0.814423	0.687987	1	1	25	tags=10%, list=2%, signal=10%
MOG1_BIND	29	-0.244148	-0.814187	0.751124	1	1	262	tags=28%, list=25%, signal=36%
ESA1-L254P_SGA	20	-0.266161	-0.813619	0.719436	1	1	135	tags=20%, list=13%, signal=22%
ASF1_SGA	17	-0.279157	-0.812621	0.715434	1	1	402	tags=41%, list=38%, signal=65%
TFA2-45_SGA	22	-0.253673	-0.811197	0.734059	1	1	297	tags=32%, list=28%, signal=43%
ATP23_BIND	16	-0.283747	-0.80992	0.719101	1	1	132	tags=19%, list=12%, signal=21%
NOP4_BIND	20	-0.267009	-0.808229	0.717593	1	1	142	tags=10%, list=13%, signal=11%
OST2_DAMP_SGA	31	-0.239135	-0.807144	0.745985	1	1	339	tags=39%, list=32%, signal=55%
CDC5_7H_DN	129	-0.181691	-0.80709	0.839125	1	1	509	tags=50%, list=48%, signal=85%
SWR1_SGA	22	-0.258987	-0.80649	0.724194	1	1	19	tags=9%, list=2%, signal=9%
ALG5_SGA	29	-0.23711	-0.805865	0.734043	1	1	178	tags=24%, list=17%, signal=28%
HOC1_BIND	24	-0.249472	-0.805828	0.756135	1	1	105	tags=13%, list=10%, signal=14%
GDS1_SGA	16	-0.272493	-0.805476	0.733871	1	1	543	tags=69%, list=51%, signal=138%
RPS0A_BIND	21	-0.260126	-0.805158	0.729483	1	1	152	tags=14%, list=14%, signal=16%
MDM10_BIND	19	-0.261935	-0.80406	0.752672	1	1	287	tags=32%, list=27%, signal=42%
CA21CHR3X2	28	-0.240715	-0.804004	0.746606	1	1	278	tags=32%, list=26%, signal=42%
NIC96_DAMP_SGA	25	-0.249944	-0.803616	0.743243	1	1	355	tags=32%, list=33%, signal=47%
NUCLEIC ACID BINDING_MOL	71	-0.196686	-0.803148	0.807365	1	1	405	tags=39%, list=38%, signal=59%
RPP2B_SGA	18	-0.270795	-0.802156	0.72327	1	1	411	tags=44%, list=39%, signal=71%
SWD1_SGA	16	-0.281718	-0.800819	0.735819	1	1	415	tags=38%, list=39%, signal=61%
MMM1_BIND	16	-0.275282	-0.799611	0.729064	1	1	239	tags=25%, list=22%, signal=32%
CTF4_BIND	23	-0.253081	-0.799235	0.742358	1	1	130	tags=17%, list=12%, signal=19%
EXG1_SGA	17	-0.274829	-0.79887	0.713622	1	1	357	tags=35%, list=34%, signal=52%
YPT6_SGA	40	-0.22029	-0.798835	0.75	1	1	403	tags=45%, list=38%, signal=70%
JJJ3_SGA	15	-0.282983	-0.798372	0.714719	1	1	151	tags=20%, list=14%, signal=23%
GIM4_BIND	35	-0.225745	-0.798331	0.753363	1	1	113	tags=11%, list=11%, signal=12%
RPL1B_SGA	17	-0.271294	-0.798225	0.729642	1	1	355	tags=35%, list=33%, signal=52%
CDC11-5_SGA	41	-0.221524	-0.79808	0.777778	1	1	366	tags=44%, list=34%, signal=64%
MGR3_SGA	19	-0.259171	-0.796635	0.738134	1	1	554	tags=58%, list=52%, signal=119%
YAR029W_SGA	19	-0.261067	-0.794409	0.754717	1	1	177	tags=21%, list=17%, signal=25%
YPL109C_SGA	17	-0.269418	-0.793664	0.742947	1	1	129	tags=18%, list=12%, signal=20%
CRN1_BIND	17	-0.269504	-0.79342	0.724247	1	1	211	tags=24%, list=20%, signal=29%
TOP1_BIND	22	-0.249381	-0.792827	0.780604	1	1	407	tags=41%, list=38%, signal=65%
SAC1_BIND	68	-0.197404	-0.792125	0.822342	1	1	222	tags=19%, list=21%, signal=23%
NUP188_BIND	26	-0.24228	-0.792042	0.775264	1	1	488	tags=58%, list=46%, signal=104%
SMALL RIBOSOMAL SUBUNIT_CEL	30	-0.233589	-0.791783	0.760563	1	1	485	tags=53%, list=46%, signal=95%
TRANSCRIPTION_BIO	53	-0.204354	-0.790089	0.816643	1	1	375	tags=43%, list=35%, signal=64%
ERR1_SGA	37	-0.221676	-0.789953	0.775393	1	1	223	tags=27%, list=21%, signal=33%
MED1_SGA	21	-0.256352	-0.789421	0.750385	1	1	344	tags=43%, list=32%, signal=62%
MET22_BIND	18	-0.264839	-0.78857	0.750831	1	1	488	tags=61%, list=46%, signal=111%
PIL1_BIND	15	-0.272	-0.787746	0.74259	1	1	325	tags=33%, list=31%, signal=47%
SRB2_BIND	31	-0.231158	-0.787692	0.778288	1	1	402	tags=45%, list=38%, signal=71%
RRP1-1_SGA	27	-0.239955	-0.787304	0.770981	1	1	444	tags=48%, list=42%, signal=81%
MSC1_BIND	33	-0.228025	-0.787109	0.773643	1	1	252	tags=27%, list=24%, signal=35%
CIK1_SGA	53	-0.205416	-0.786791	0.812849	1	1	280	tags=28%, list=26%, signal=37%
IKI3_BIND	32	-0.228497	-0.786181	0.788937	1	1	214	tags=19%, list=20%, signal=23%
HU_6H_DN	53	-0.204616	-0.785887	0.784011	1	1	442	tags=40%, list=42%, signal=64%
STE50_BIND	29	-0.232763	-0.783003	0.75819	1	1	244	tags=31%, list=23%, signal=39%
RNA LOCALIZATION_BIO	18	-0.263627	-0.782786	0.755167	1	1	446	tags=44%, list=42%, signal=75%
PHO80_BIND	30	-0.229602	-0.782068	0.793313	1	1	182	tags=23%, list=17%, signal=27%
UTP6_BIND	15	-0.27235	-0.781537	0.758037	1	1	470	tags=53%, list=44%, signal=94%
RTT103_BIND	34	-0.219089	-0.780597	0.801788	1	1	105	tags=12%, list=10%, signal=13%
VPS41_SGA	16	-0.269418	-0.779531	0.748344	1	1	328	tags=50%, list=31%, signal=71%
CDC20-3_SGA	30	-0.231065	-0.778741	0.788491	1	1	325	tags=30%, list=31%, signal=42%
BRE2_BIND	17	-0.264074	-0.778001	0.767036	1	1	151	tags=18%, list=14%, signal=20%
SNF4_BIND	28	-0.2389	-0.777871	0.774146	1	1	402	tags=43%, list=38%, signal=67%
DNA METABOLIC PROCESS_BIO	38	-0.218413	-0.777752	0.809172	1	1	320	tags=34%, list=30%, signal=47%
APL1_SGA	18	-0.26446	-0.777421	0.793528	1	1	149	tags=17%, list=14%, signal=19%
BRE5_BIND	53	-0.201934	-0.775054	0.847578	1	1	36	tags=8%, list=3%, signal=7%
SLX8_BIND	30	-0.225539	-0.774352	0.784195	1	1	462	tags=47%, list=43%, signal=80%
ELP3_BIND	30	-0.229361	-0.774058	0.77259	1	1	252	tags=27%, list=24%, signal=34%
CSM3_BIND	17	-0.262236	-0.773607	0.731942	1	1	244	tags=29%, list=23%, signal=38%
RPS11A_BIND	21	-0.244687	-0.771099	0.763033	1	1	447	tags=43%, list=42%, signal=72%
VAM7_SGA	29	-0.232589	-0.770293	0.79321	1	1	143	tags=14%, list=13%, signal=16%
YEL020C_SGA	25	-0.233026	-0.770212	0.778288	1	1	378	tags=36%, list=36%, signal=55%
CDC3-1_SGA	52	-0.202577	-0.770211	0.827972	1	1	364	tags=42%, list=34%, signal=61%
GCR2_BIND	21	-0.244401	-0.768875	0.790447	1	1	247	tags=29%, list=23%, signal=36%
ACE2-CHIP	51	-0.200859	-0.768624	0.826573	1	1	408	tags=43%, list=38%, signal=67%
GIM5_SGA	40	-0.209759	-0.768613	0.82029	1	1	133	tags=15%, list=13%, signal=17%
EAF1_BIND	46	-0.204466	-0.76637	0.83	1	1	104	tags=11%, list=10%, signal=12%
MED1_BIND	32	-0.225848	-0.766092	0.785294	1	1	132	tags=13%, list=12%, signal=14%
RPS1A_BIND	27	-0.233142	-0.7642	0.797546	1	1	505	tags=48%, list=48%, signal=89%
ACT1-124_SGA	27	-0.234072	-0.7639	0.785174	1	1	354	tags=37%, list=33%, signal=54%
RLI1_DAMP_SGA	17	-0.256546	-0.761768	0.772876	1	1	133	tags=12%, list=13%, signal=13%
HPA2_SGA	19	-0.256991	-0.760795	0.784074	1	1	113	tags=16%, list=11%, signal=17%
JNM1_BIND	17	-0.258137	-0.760486	0.799387	1	1	462	tags=47%, list=43%, signal=82%
RPS30A_SGA	22	-0.23626	-0.759153	0.785381	1	1	584	tags=68%, list=55%, signal=148%
PAC11_BIND	16	-0.266401	-0.758905	0.795276	1	1	328	tags=38%, list=31%, signal=53%
SEC17-1_SGA	21	-0.244132	-0.758158	0.779904	1	1	252	tags=24%, list=24%, signal=31%
VAM7_BIND	26	-0.233758	-0.757902	0.818043	1	1	274	tags=35%, list=26%, signal=45%
SGF73_SGA	24	-0.235047	-0.755299	0.816541	1	1	223	tags=21%, list=21%, signal=26%
CDC3-3_SGA	74	-0.185016	-0.753942	0.886767	1	1	357	tags=35%, list=34%, signal=49%
KAP95_BIND	19	-0.249214	-0.753924	0.807453	1	1	446	tags=42%, list=42%, signal=71%
HDA3_SGA	16	-0.258972	-0.753429	0.775777	1	1	313	tags=44%, list=29%, signal=61%
GAS1_SGA	43	-0.205923	-0.752876	0.832326	1	1	354	tags=35%, list=33%, signal=50%
ARP6_BIND	34	-0.214877	-0.752471	0.816058	1	1	247	tags=29%, list=23%, signal=37%
HSP104_BIND	15	-0.2624	-0.752453	0.777244	1	1	446	tags=53%, list=42%, signal=91%
KGD2_BIND	17	-0.253562	-0.749795	0.808374	1	1	248	tags=24%, list=23%, signal=30%
YRA1_BIND	44	-0.204313	-0.749517	0.829197	1	1	519	tags=61%, list=49%, signal=115%
ECM33_SGA	44	-0.2035	-0.748815	0.837916	1	1	444	tags=50%, list=42%, signal=82%
RIM9_BIND	18	-0.251909	-0.747671	0.802488	1	1	24	tags=6%, list=2%, signal=6%
UTR1_SGA	16	-0.260064	-0.747625	0.793651	1	1	223	tags=19%, list=21%, signal=23%
VID22_BIND	18	-0.243627	-0.747599	0.791988	1	1	159	tags=17%, list=15%, signal=19%
RSC2_BIND	22	-0.240659	-0.747218	0.788754	1	1	104	tags=14%, list=10%, signal=15%
SNT309_SGA	36	-0.210975	-0.747027	0.83153	1	1	129	tags=14%, list=12%, signal=15%
TRANSCRIPTION, DNA-DEPENDENT_BIO	51	-0.195662	-0.746725	0.866947	1	1	375	tags=43%, list=35%, signal=63%
RPS3_BIND	37	-0.2154	-0.74664	0.843195	1	1	843	tags=100%, list=79%, signal=466%
RNA BIOSYNTHETIC PROCESS_BIO	51	-0.195662	-0.745805	0.866008	1	1	375	tags=43%, list=35%, signal=63%
SHE4_BIND	20	-0.245825	-0.745607	0.802215	1	1	252	tags=20%, list=24%, signal=26%
KEM1_BIND	60	-0.188979	-0.744605	0.854077	1	1	253	tags=25%, list=24%, signal=31%
IES2_SGA	37	-0.206846	-0.74442	0.849415	1	1	138	tags=14%, list=13%, signal=15%
KAP123_BIND	19	-0.252339	-0.743451	0.8048	1	1	446	tags=47%, list=42%, signal=80%
NUCLEAR ENVELOPE_CEL	15	-0.258122	-0.742849	0.807571	1	1	309	tags=27%, list=29%, signal=37%
PMR1_BIND	33	-0.214262	-0.742626	0.810345	1	1	104	tags=12%, list=10%, signal=13%
URM1_BIND	16	-0.25979	-0.742173	0.777958	1	1	792	tags=100%, list=75%, signal=386%
VPS27_SGA	34	-0.212484	-0.741606	0.8598	1	1	339	tags=35%, list=32%, signal=50%
SAK1-DOWN	40	-0.205183	-0.740438	0.844508	1	1	432	tags=52%, list=41%, signal=85%
MSN5_SGA	16	-0.254837	-0.740396	0.808	1	1	418	tags=63%, list=39%, signal=101%
CHD1_BIND	31	-0.219259	-0.739851	0.843558	1	1	186	tags=19%, list=17%, signal=23%
SSK2_SGA	16	-0.260161	-0.739696	0.784469	1	1	478	tags=56%, list=45%, signal=101%
KEM1_SGA	39	-0.201287	-0.739223	0.85036	1	1	494	tags=49%, list=46%, signal=88%
RTT109_BIND	26	-0.226315	-0.738894	0.825228	1	1	85	tags=12%, list=8%, signal=12%
EAF7_SGA	17	-0.252538	-0.73864	0.78882	1	1	273	tags=29%, list=26%, signal=39%
RRP9_BIND	16	-0.252803	-0.737043	0.801932	1	1	536	tags=63%, list=50%, signal=124%
CLN2_BIND	16	-0.251217	-0.736567	0.813804	1	1	105	tags=19%, list=10%, signal=20%
LSP1_BIND	15	-0.257018	-0.736268	0.790297	1	1	318	tags=27%, list=30%, signal=38%
SWI4_BIND	42	-0.197901	-0.735743	0.858616	1	1	36	tags=7%, list=3%, signal=7%
UME1_BIND	20	-0.235785	-0.734714	0.810726	1	1	270	tags=20%, list=25%, signal=26%
CA21CHR1X9	17	-0.250411	-0.733778	0.8125	1	1	194	tags=24%, list=18%, signal=28%
ARC15-10_SGA	33	-0.214106	-0.733664	0.828102	1	1	227	tags=24%, list=21%, signal=30%
QCR2_BIND	21	-0.236049	-0.733041	0.831008	1	1	365	tags=52%, list=34%, signal=78%
SLX1_SGA	15	-0.261245	-0.731961	0.839117	1	1	340	tags=47%, list=32%, signal=68%
KINASE ACTIVITY_MOL	18	-0.244683	-0.731564	0.822222	1	1	525	tags=72%, list=49%, signal=140%
ARD1_BIND	17	-0.24992	-0.731177	0.806604	1	1	402	tags=41%, list=38%, signal=65%
GCN1_SGA	27	-0.220358	-0.730292	0.832558	1	1	494	tags=56%, list=46%, signal=101%
VID22_SGA	23	-0.227971	-0.729625	0.836141	1	1	402	tags=52%, list=38%, signal=82%
TIF1_BIND	31	-0.216234	-0.729478	0.841716	1	1	295	tags=19%, list=28%, signal=26%
TUB1_BIND	24	-0.225772	-0.729429	0.836672	1	1	166	tags=17%, list=16%, signal=19%
ADH3_SGA	19	-0.23889	-0.727402	0.809904	1	1	143	tags=16%, list=13%, signal=18%
GFA1_BIND	21	-0.239937	-0.727086	0.828616	1	1	436	tags=43%, list=41%, signal=71%
RPS30A_BIND	20	-0.236153	-0.72694	0.853081	1	1	301	tags=30%, list=28%, signal=41%
SEC11-2_SGA	30	-0.213199	-0.726229	0.872564	1	1	378	tags=40%, list=36%, signal=60%
INTRACELLULAR PROTEIN TRANSPORT_BIO	41	-0.197233	-0.725955	0.861862	1	1	335	tags=29%, list=32%, signal=41%
VPS72_BIND	34	-0.206694	-0.725915	0.865854	1	1	297	tags=32%, list=28%, signal=43%
EOS1_BIND	33	-0.212451	-0.725687	0.878742	1	1	222	tags=24%, list=21%, signal=30%
TRM1_SGA	15	-0.258062	-0.72541	0.81129	1	1	402	tags=47%, list=38%, signal=74%
YDJ1_BIND	36	-0.20579	-0.725188	0.852224	1	1	273	tags=25%, list=26%, signal=33%
ENDOMEMBRANE SYSTEM_CEL	36	-0.202883	-0.724678	0.87057	1	1	40	tags=8%, list=4%, signal=8%
BMS1-1_SGA	26	-0.221118	-0.723995	0.841463	1	1	325	tags=35%, list=31%, signal=49%
PHO23_BIND	45	-0.195938	-0.723197	0.886202	1	1	357	tags=29%, list=34%, signal=42%
RTF1_SGA	46	-0.194763	-0.722086	0.883234	1	1	314	tags=30%, list=30%, signal=41%
HOM6_SGA	44	-0.194553	-0.721667	0.893466	1	1	344	tags=27%, list=32%, signal=39%
EMI1_SGA	39	-0.196499	-0.719244	0.867924	1	1	499	tags=56%, list=47%, signal=102%
OS(HOG1)_DN	24	-0.225811	-0.718866	0.856025	1	1	290	tags=29%, list=27%, signal=39%
HYPHAE FBS37 (NANTEL)_UP	58	-0.18295	-0.717612	0.895978	1	1	521	tags=57%, list=49%, signal=106%
FKS1_SGA	21	-0.230267	-0.716981	0.823622	1	1	214	tags=29%, list=20%, signal=35%
PROTEIN TARGETING_BIO	40	-0.201229	-0.716649	0.874278	1	1	40	tags=8%, list=4%, signal=8%
KGD2_SGA	31	-0.210794	-0.716459	0.865672	1	1	339	tags=35%, list=32%, signal=51%
IST3_SGA	24	-0.224689	-0.716442	0.839286	1	1	404	tags=46%, list=38%, signal=72%
ELP3_SGA	21	-0.228963	-0.716224	0.853621	1	1	357	tags=48%, list=34%, signal=70%
REI1_BIND	25	-0.221745	-0.715797	0.82406	1	1	252	tags=24%, list=24%, signal=31%
SLM4_SGA	27	-0.213148	-0.715322	0.863502	1	1	141	tags=19%, list=13%, signal=21%
UBP3_BIND	52	-0.186115	-0.713906	0.854046	1	1	252	tags=25%, list=24%, signal=31%
MACROMOLECULAR COMPLEX ASSEMBLY_BIO	60	-0.179682	-0.712943	0.897759	1	1	219	tags=18%, list=21%, signal=22%
SEC9-4_SGA	24	-0.223024	-0.712762	0.83958	1	1	186	tags=17%, list=17%, signal=20%
DGK1_SGA	45	-0.191983	-0.711596	0.884164	1	1	133	tags=13%, list=13%, signal=15%
SNF6-UP-30C	22	-0.227836	-0.711279	0.845787	1	1	175	tags=23%, list=16%, signal=27%
POL30_BIND	22	-0.22601	-0.711268	0.841121	1	1	151	tags=18%, list=14%, signal=21%
YAK1_H_DN	106	-0.16122	-0.711085	0.942708	1	1	156	tags=14%, list=15%, signal=15%
TEF1_BIND	26	-0.216952	-0.709466	0.860681	1	1	139	tags=15%, list=13%, signal=17%
MGR2_SGA	17	-0.24207	-0.709429	0.836508	1	1	206	tags=24%, list=19%, signal=29%
MRC1_BIND	22	-0.221464	-0.708846	0.827481	1	1	182	tags=23%, list=17%, signal=27%
TAC1_UP	16	-0.249284	-0.707668	0.84051	1	1	803	tags=100%, list=76%, signal=403%
SHS1_SGA	28	-0.212845	-0.706727	0.841615	1	1	129	tags=14%, list=12%, signal=16%
COG5_SGA	27	-0.209154	-0.703998	0.898792	1	1	334	tags=33%, list=31%, signal=47%
SKI8_BIND	16	-0.241315	-0.703865	0.831731	1	1	258	tags=31%, list=24%, signal=41%
CELL CORTEX_CEL	20	-0.230078	-0.703839	0.836193	1	1	100	tags=15%, list=9%, signal=16%
CHL1_BIND	15	-0.248848	-0.703594	0.845426	1	1	83	tags=13%, list=8%, signal=14%
SWR1_BIND	38	-0.200712	-0.702653	0.897694	1	1	252	tags=26%, list=24%, signal=33%
DBP3_SGA	18	-0.237946	-0.70223	0.851064	1	1	478	tags=56%, list=45%, signal=99%
CA21CHR6X1	17	-0.242209	-0.701297	0.843844	1	1	136	tags=24%, list=13%, signal=27%
SIW14_BIND	15	-0.25	-0.699476	0.839546	1	1	802	tags=100%, list=75%, signal=402%
RPT4-150_SGA	28	-0.208213	-0.698845	0.870918	1	1	105	tags=11%, list=10%, signal=12%
CELL CORTEX PART_CEL	20	-0.230078	-0.698621	0.86233	1	1	100	tags=15%, list=9%, signal=16%
HOS2_SGA	23	-0.218623	-0.697318	0.853583	1	1	129	tags=13%, list=12%, signal=15%
SKI8_SGA	18	-0.23781	-0.696808	0.864062	1	1	462	tags=61%, list=43%, signal=106%
CA21CHR3X8	18	-0.232834	-0.696342	0.859813	1	1	348	tags=39%, list=33%, signal=57%
RPL4A_BIND	28	-0.206236	-0.694963	0.902798	1	1	470	tags=39%, list=44%, signal=69%
SHR3_DAMP_SGA	46	-0.183646	-0.693784	0.903039	1	1	209	tags=17%, list=20%, signal=21%
ICE2_SGA	33	-0.203994	-0.693595	0.898089	1	1	151	tags=18%, list=14%, signal=21%
NUP1_BIND	15	-0.24533	-0.693535	0.850318	1	1	566	tags=53%, list=53%, signal=112%
ORC2-1_SGA	18	-0.23553	-0.693422	0.856482	1	1	252	tags=22%, list=24%, signal=29%
RPL25_BIND	35	-0.200528	-0.692111	0.908297	1	1	343	tags=23%, list=32%, signal=33%
GENERATION OF PRECURSOR METABOLITES AND ENERGY_BIO	42	-0.191671	-0.691891	0.914925	1	1	34	tags=7%, list=3%, signal=7%
OST3_SGA	19	-0.233812	-0.691392	0.860778	1	1	244	tags=32%, list=23%, signal=40%
YGR122W_BIND	21	-0.22439	-0.691266	0.87224	1	1	328	tags=33%, list=31%, signal=47%
IFH1_TF	33	-0.19929	-0.691069	0.886131	1	1	591	tags=64%, list=56%, signal=139%
RIA1_SGA	48	-0.183277	-0.690586	0.917482	1	1	355	tags=31%, list=33%, signal=45%
URA2_BIND	22	-0.221371	-0.690551	0.881459	1	1	227	tags=18%, list=21%, signal=23%
TAF12_BIND	19	-0.230987	-0.689982	0.882911	1	1	297	tags=32%, list=28%, signal=43%
YKE2_SGA	26	-0.211126	-0.687961	0.903276	1	1	19	tags=8%, list=2%, signal=8%
PROTEIN TRANSPORT_BIO	42	-0.186324	-0.687678	0.90767	1	1	40	tags=7%, list=4%, signal=7%
PDE2_SGA	22	-0.223106	-0.687616	0.865185	1	1	214	tags=23%, list=20%, signal=28%
MMS22_BIND	20	-0.224699	-0.685504	0.874622	1	1	244	tags=25%, list=23%, signal=32%
SPT3_SGA	23	-0.218961	-0.684945	0.876369	1	1	342	tags=30%, list=32%, signal=44%
TAF5-15_SGA	21	-0.225875	-0.684083	0.876997	1	1	314	tags=33%, list=30%, signal=46%
CELLULAR BIOSYNTHETIC PROCESS_BIO	78	-0.165859	-0.683881	0.954167	1	1	182	tags=18%, list=17%, signal=20%
ICE2_BIND	29	-0.205495	-0.682215	0.892171	1	1	130	tags=17%, list=12%, signal=19%
BEM1_SGA	44	-0.184676	-0.681741	0.913897	1	1	244	tags=20%, list=23%, signal=25%
ILM1_SGA	51	-0.178236	-0.680377	0.944126	1	1	262	tags=24%, list=25%, signal=30%
CA21CHRRX5	29	-0.201201	-0.679672	0.901366	1	1	174	tags=21%, list=16%, signal=24%
TYE7-BOUND-PEREZ	57	-0.174317	-0.679097	0.934783	1	1	360	tags=35%, list=34%, signal=50%
SPT8_BIND	15	-0.244405	-0.678709	0.873377	1	1	202	tags=20%, list=19%, signal=24%
MSN5_BIND	22	-0.210375	-0.678656	0.882353	1	1	845	tags=100%, list=79%, signal=478%
POL32_SGA	27	-0.207505	-0.678527	0.904401	1	1	186	tags=22%, list=17%, signal=26%
RRP8_BIND	22	-0.220543	-0.67785	0.865815	1	1	575	tags=59%, list=54%, signal=126%
AIR1_BIND	16	-0.237558	-0.677674	0.863077	1	1	504	tags=56%, list=47%, signal=105%
VPH1_BIND	16	-0.236501	-0.677442	0.879085	1	1	313	tags=38%, list=29%, signal=52%
RTS2_DAMP_SGA	25	-0.205304	-0.676734	0.885321	1	1	273	tags=28%, list=26%, signal=37%
SKI3_SGA	22	-0.215609	-0.674752	0.879336	1	1	478	tags=50%, list=45%, signal=89%
SWD1_BIND	18	-0.220378	-0.673397	0.882995	1	1	402	tags=44%, list=38%, signal=70%
YJL068C_SGA	19	-0.218391	-0.671879	0.894984	1	1	836	tags=100%, list=79%, signal=460%
CMD1-8_SGA	24	-0.209393	-0.671517	0.917431	1	1	444	tags=50%, list=42%, signal=84%
TMA19_SGA	21	-0.212723	-0.668824	0.895404	1	1	240	tags=24%, list=23%, signal=30%
INTEGRAL TO MEMBRANE_CEL	26	-0.203887	-0.668239	0.89403	1	1	456	tags=46%, list=43%, signal=79%
SAP30_SGA	34	-0.188917	-0.663853	0.922965	1	1	244	tags=18%, list=23%, signal=22%
GCN20_BIND	25	-0.201711	-0.662789	0.893455	1	1	246	tags=24%, list=23%, signal=30%
RVB1_DAMP_SGA	23	-0.210927	-0.662655	0.890282	1	1	129	tags=13%, list=12%, signal=15%
ALG1-1_SGA	24	-0.207031	-0.661916	0.913636	1	1	357	tags=42%, list=34%, signal=61%
MEMBRANE PART_CEL	73	-0.162138	-0.661909	0.953992	1	1	40	tags=7%, list=4%, signal=7%
YKR018C_SGA	18	-0.220731	-0.660305	0.890625	1	1	400	tags=50%, list=38%, signal=79%
CKB1_BIND	38	-0.184067	-0.659262	0.934947	1	1	151	tags=13%, list=14%, signal=15%
SCS2_BIND	15	-0.23191	-0.658175	0.891761	1	1	96	tags=13%, list=9%, signal=14%
RPP2B_BIND	19	-0.216448	-0.657874	0.898279	1	1	325	tags=32%, list=31%, signal=45%
VPS71_BIND	38	-0.183221	-0.657339	0.925872	1	1	252	tags=26%, list=24%, signal=33%
UBC6_SGA	21	-0.210857	-0.654405	0.906907	1	1	330	tags=38%, list=31%, signal=54%
SSD1_SGA	54	-0.171449	-0.653684	0.95245	1	1	166	tags=19%, list=16%, signal=21%
RAD27_SGA	29	-0.196689	-0.653334	0.911278	1	1	133	tags=14%, list=13%, signal=15%
SDA1-2_SGA	15	-0.234282	-0.653285	0.885852	1	1	355	tags=33%, list=33%, signal=49%
ESTABLISHMENT OF PROTEIN LOCALIZATION_BIO	44	-0.176773	-0.653121	0.944118	1	1	40	tags=7%, list=4%, signal=7%
TMA23_BIND	22	-0.207512	-0.652246	0.90694	1	1	509	tags=50%, list=48%, signal=94%
RPL8A_BIND	26	-0.200494	-0.651987	0.90367	1	1	270	tags=19%, list=25%, signal=25%
HHF2_BIND	19	-0.215303	-0.65044	0.907348	1	1	85	tags=11%, list=8%, signal=11%
MEH1_BIND	19	-0.214805	-0.650144	0.906349	1	1	247	tags=26%, list=23%, signal=34%
CA21CHR7X5	23	-0.205347	-0.649507	0.926205	1	1	359	tags=35%, list=34%, signal=51%
RPS24B_SGA	16	-0.22156	-0.649381	0.882927	1	1	378	tags=38%, list=36%, signal=57%
CA21CHR5X6	21	-0.20998	-0.649236	0.906977	1	1	247	tags=29%, list=23%, signal=36%
RRM3_SGA	17	-0.219592	-0.646143	0.903276	1	1	411	tags=47%, list=39%, signal=75%
SRM1-TS_SGA	17	-0.225452	-0.645775	0.909667	1	1	529	tags=59%, list=50%, signal=115%
RPO21_BIND	26	-0.195405	-0.645672	0.90413	1	1	372	tags=35%, list=35%, signal=52%
SNF5_BIND	21	-0.209551	-0.645551	0.908819	1	1	439	tags=48%, list=41%, signal=80%
GCN1_BIND	34	-0.185068	-0.644446	0.937973	1	1	217	tags=18%, list=20%, signal=21%
PUT3P_TFMOTIF	38	-0.180664	-0.643531	0.937313	1	1	209	tags=21%, list=20%, signal=25%
MNE1_SGA	26	-0.197778	-0.642872	0.91821	1	1	340	tags=35%, list=32%, signal=50%
HOG1_BIND	17	-0.219764	-0.642695	0.88595	1	1	270	tags=29%, list=25%, signal=39%
PMA2_BIND	18	-0.212176	-0.641991	0.911909	1	1	19	tags=6%, list=2%, signal=6%
HOC1_SGA	41	-0.1775	-0.641666	0.951327	1	1	133	tags=15%, list=13%, signal=16%
OCA1_BIND	17	-0.219208	-0.641214	0.905145	1	1	328	tags=41%, list=31%, signal=59%
CYT1_SGA	25	-0.199958	-0.640961	0.921539	1	1	469	tags=40%, list=44%, signal=70%
MTC4_BIND	15	-0.226159	-0.640737	0.895666	1	1	431	tags=53%, list=41%, signal=88%
RPA49_BIND	19	-0.210677	-0.638588	0.901991	1	1	402	tags=42%, list=38%, signal=67%
CDC24-3_SGA	15	-0.222759	-0.632217	0.916944	1	1	400	tags=40%, list=38%, signal=63%
RPO31-698_SGA	19	-0.207513	-0.631008	0.909236	1	1	357	tags=37%, list=34%, signal=54%
HHT1_BIND	38	-0.175995	-0.627971	0.95188	1	1	252	tags=21%, list=24%, signal=27%
CUE1_BIND	19	-0.207202	-0.627787	0.934681	1	1	83	tags=11%, list=8%, signal=11%
ERG6_BIND	25	-0.193206	-0.62724	0.936826	1	1	431	tags=48%, list=41%, signal=79%
UME6_BIND	28	-0.191821	-0.624659	0.938272	1	1	151	tags=18%, list=14%, signal=20%
RPS1B_BIND	31	-0.182113	-0.624556	0.948936	1	1	593	tags=55%, list=56%, signal=120%
YHC1-8_SGA	25	-0.191826	-0.624027	0.935737	1	1	178	tags=16%, list=17%, signal=19%
ASF1_BIND	27	-0.189066	-0.62343	0.936107	1	1	244	tags=22%, list=23%, signal=28%
ESTABLISHMENT AND/OR MAINTENANCE OF CHROMATIN ARCHITECTURE_BIO	20	-0.200542	-0.622836	0.925581	1	1	320	tags=35%, list=30%, signal=49%
GCN2_SGA	27	-0.188158	-0.622695	0.94152	1	1	252	tags=26%, list=24%, signal=33%
HDA3_BIND	16	-0.216998	-0.622666	0.913112	1	1	270	tags=25%, list=25%, signal=33%
TRANSFERASE ACTIVITY, TRANSFERRING ACYL GROUPS_MOL	21	-0.202399	-0.621867	0.934713	1	1	202	tags=19%, list=19%, signal=23%
CDC7-4_SGA	33	-0.183857	-0.621792	0.954876	1	1	150	tags=15%, list=14%, signal=17%
NST1_BIND	24	-0.191664	-0.620227	0.924127	1	1	202	tags=17%, list=19%, signal=20%
SSB1_BIND	88	-0.150284	-0.620042	0.982216	1	1	356	tags=31%, list=33%, signal=42%
SSY1_DAMP_SGA	23	-0.194924	-0.618093	0.9392	1	1	325	tags=39%, list=31%, signal=55%
VPS8_BIND	35	-0.175357	-0.616811	0.949785	1	1	19	tags=6%, list=2%, signal=6%
FLX1_SGA	21	-0.197227	-0.616314	0.926941	1	1	570	tags=71%, list=54%, signal=151%
ACT1_BIND	31	-0.180213	-0.615585	0.957413	1	1	375	tags=32%, list=35%, signal=48%
FAR10_SGA	25	-0.189534	-0.615229	0.921805	1	1	366	tags=44%, list=34%, signal=66%
T1 ACETIC-VS-CONTROL_DN	23	-0.194207	-0.61514	0.925076	1	1	175	tags=17%, list=16%, signal=20%
DNA PACKAGING_BIO	20	-0.200542	-0.613716	0.92126	1	1	320	tags=35%, list=30%, signal=49%
PSA1_BIND	20	-0.199425	-0.61329	0.958461	1	1	856	tags=100%, list=81%, signal=504%
TOM1_SGA	31	-0.180925	-0.612391	0.94109	1	1	483	tags=45%, list=45%, signal=80%
TIF2_BIND	20	-0.202807	-0.612087	0.935691	1	1	347	tags=30%, list=33%, signal=44%
RPL30_BIND	27	-0.183398	-0.611277	0.949843	1	1	874	tags=100%, list=82%, signal=548%
CA21CHR3X4	21	-0.200936	-0.610968	0.933333	1	1	394	tags=43%, list=37%, signal=67%
SPP382_DAMP_SGA	15	-0.216683	-0.61096	0.937695	1	1	483	tags=60%, list=45%, signal=108%
FYV10_SGA	25	-0.188261	-0.608183	0.938715	1	1	357	tags=32%, list=34%, signal=47%
XS(2006)_DN	119	-0.138776	-0.604484	0.996149	1	1	494	tags=52%, list=46%, signal=86%
GCN5_BIND	17	-0.2069	-0.603852	0.950658	1	1	213	tags=24%, list=20%, signal=29%
EDS1_SGA	15	-0.210109	-0.602388	0.923318	1	1	344	tags=33%, list=32%, signal=49%
RPA34_BIND	28	-0.179068	-0.600253	0.956973	1	1	433	tags=43%, list=41%, signal=70%
TPS2_BIND	16	-0.20874	-0.600166	0.925081	1	1	17	tags=6%, list=2%, signal=6%
RPL6B_BIND	29	-0.180281	-0.600093	0.959311	1	1	506	tags=41%, list=48%, signal=77%
SEH1_SGA	44	-0.159843	-0.596526	0.965116	1	1	402	tags=39%, list=38%, signal=60%
RPD3_BIND	17	-0.20377	-0.59556	0.931193	1	1	186	tags=18%, list=17%, signal=21%
DUO1-2_SGA	41	-0.166044	-0.595034	0.958807	1	1	479	tags=51%, list=45%, signal=90%
CA21CHR3X9	26	-0.182172	-0.592145	0.952941	1	1	209	tags=19%, list=20%, signal=23%
PDA1_BIND	25	-0.182346	-0.590405	0.954819	1	1	287	tags=24%, list=27%, signal=32%
LST4_BIND	20	-0.193312	-0.589856	0.956857	1	1	214	tags=20%, list=20%, signal=25%
GSP1_BIND	15	-0.210878	-0.588875	0.929825	1	1	843	tags=100%, list=79%, signal=476%
RPB3_BIND	16	-0.203474	-0.587794	0.955696	1	1	537	tags=63%, list=51%, signal=124%
MEMBRANE ORGANIZATION AND BIOGENESIS_BIO	21	-0.189079	-0.585633	0.945205	1	1	404	tags=43%, list=38%, signal=68%
CAP1_BIND	15	-0.20521	-0.584359	0.941653	1	1	371	tags=40%, list=35%, signal=61%
HIR2_BIND	24	-0.179588	-0.5835	0.946774	1	1	132	tags=13%, list=12%, signal=14%
YKE2_BIND	36	-0.166259	-0.581875	0.967643	1	1	19	tags=6%, list=2%, signal=5%
BIM1_SGA	39	-0.159925	-0.580621	0.968889	1	1	494	tags=51%, list=46%, signal=92%
YME1_BIND	15	-0.205585	-0.578857	0.953748	1	1	328	tags=40%, list=31%, signal=57%
WBP1-1_SGA	49	-0.151933	-0.578661	0.97554	1	1	162	tags=14%, list=15%, signal=16%
MET30-9_SGA	20	-0.186002	-0.578097	0.942308	1	1	870	tags=100%, list=82%, signal=540%
HIR1_BIND	21	-0.18694	-0.575836	0.962906	1	1	133	tags=14%, list=13%, signal=16%
ALA1-1_SGA	16	-0.19681	-0.572687	0.959311	1	1	403	tags=44%, list=38%, signal=69%
CA21CHR2X5	22	-0.183798	-0.572606	0.958967	1	1	320	tags=32%, list=30%, signal=45%
TRANSFERASE ACTIVITY, TRANSFERRING GROUPS OTHER THAN AMINO-ACYL GROUPS_MOL	17	-0.196387	-0.57231	0.93543	1	1	202	tags=18%, list=19%, signal=21%
MYO2-16_SGA	33	-0.167661	-0.572257	0.968373	1	1	324	tags=30%, list=30%, signal=42%
RPS28B_SGA	17	-0.194241	-0.571158	0.943987	1	1	355	tags=29%, list=33%, signal=43%
ACYLTRANSFERASE ACTIVITY_MOL	17	-0.196387	-0.57078	0.948357	1	1	202	tags=18%, list=19%, signal=21%
LGE1_BIND	33	-0.166011	-0.570072	0.982709	1	1	403	tags=39%, list=38%, signal=61%
RUD3_BIND	33	-0.163516	-0.568873	0.984263	1	1	202	tags=15%, list=19%, signal=18%
YSR3_SGA	18	-0.191159	-0.565886	0.970827	1	1	357	tags=39%, list=34%, signal=58%
CSE2_BIND	37	-0.159709	-0.565259	0.967695	1	1	407	tags=41%, list=38%, signal=63%
RTS1_SGA	22	-0.182504	-0.563455	0.957812	1	1	357	tags=36%, list=34%, signal=54%
IDH2_BIND	21	-0.179354	-0.561492	0.96378	1	1	462	tags=48%, list=43%, signal=83%
CCW12_BIND	17	-0.191622	-0.56136	0.962848	1	1	325	tags=35%, list=31%, signal=50%
EUG1_SGA	31	-0.16376	-0.560443	0.969743	1	1	895	tags=100%, list=84%, signal=614%
HUR1_BIND	18	-0.18808	-0.559576	0.965099	1	1	430	tags=44%, list=40%, signal=73%
UBC13_BIND	17	-0.191302	-0.559101	0.9696	1	1	24	tags=6%, list=2%, signal=6%
PAH1_SGA	31	-0.164314	-0.559055	0.977645	1	1	30	tags=6%, list=3%, signal=6%
ALG6_BIND	16	-0.193446	-0.558974	0.953822	1	1	18	tags=6%, list=2%, signal=6%
VPS21_BIND	25	-0.170221	-0.556809	0.969834	1	1	133	tags=12%, list=13%, signal=13%
SSN2_BIND	17	-0.189521	-0.556756	0.962733	1	1	297	tags=29%, list=28%, signal=40%
STB1_SGA	15	-0.197837	-0.551253	0.952769	1	1	342	tags=33%, list=32%, signal=48%
CDC19_BIND	15	-0.193458	-0.551014	0.964615	1	1	227	tags=20%, list=21%, signal=25%
MSC6_SGA	22	-0.174338	-0.547855	0.970814	1	1	149	tags=14%, list=14%, signal=16%
EAF5_SGA	21	-0.177119	-0.546913	0.970126	1	1	186	tags=19%, list=17%, signal=23%
RIM20_BIND	18	-0.185575	-0.546885	0.972669	1	1	431	tags=39%, list=41%, signal=64%
SWS2_BIND	25	-0.169045	-0.546627	0.973806	1	1	302	tags=28%, list=28%, signal=38%
HOM6_BIND	26	-0.164897	-0.54427	0.980183	1	1	244	tags=19%, list=23%, signal=24%
UBC4_SGA	21	-0.177472	-0.543243	0.970079	1	1	505	tags=57%, list=48%, signal=107%
PEX4_SGA	16	-0.187857	-0.543221	0.974359	1	1	214	tags=19%, list=20%, signal=23%
RAD23_SGA	17	-0.18533	-0.537525	0.968801	1	1	105	tags=12%, list=10%, signal=13%
HDA1_BIND	16	-0.184889	-0.536282	0.967585	1	1	224	tags=19%, list=21%, signal=23%
ERG25_DAMP_SGA	21	-0.170994	-0.535586	0.988924	1	1	378	tags=38%, list=36%, signal=58%
RPL35A_BIND	23	-0.167405	-0.532653	0.982972	1	1	239	tags=22%, list=22%, signal=27%
ERV41_SGA	17	-0.181362	-0.529537	0.960784	1	1	149	tags=18%, list=14%, signal=20%
RPL2A_BIND	18	-0.178618	-0.529187	0.982732	1	1	554	tags=56%, list=52%, signal=114%
ARP1_SGA	18	-0.179115	-0.528628	0.97327	1	1	252	tags=22%, list=24%, signal=29%
VPS41_BIND	24	-0.164555	-0.523119	0.98125	1	1	274	tags=25%, list=26%, signal=33%
INTRINSIC TO MEMBRANE_CEL	27	-0.158806	-0.52265	0.987915	1	1	456	tags=44%, list=43%, signal=76%
PHO4-DOWN	76	-0.12673	-0.522482	0.998639	1	1	442	tags=45%, list=42%, signal=71%
SSL1-T242I_SGA	16	-0.177183	-0.52056	0.961477	1	1	444	tags=50%, list=42%, signal=85%
ARO7_SGA	19	-0.174911	-0.519994	0.972393	1	1	19	tags=5%, list=2%, signal=5%
GPT2_SGA	15	-0.182823	-0.517837	0.977492	1	1	415	tags=47%, list=39%, signal=75%
RPL36A_BIND	23	-0.162959	-0.516352	0.982786	1	1	584	tags=52%, list=55%, signal=113%
ARP6_SGA	38	-0.1444	-0.512748	0.989811	1	1	244	tags=21%, list=23%, signal=26%
MCK1_SGA	24	-0.161463	-0.51077	0.99688	1	1	560	tags=71%, list=53%, signal=146%
KES1_SGA	18	-0.168021	-0.509835	0.983077	1	1	378	tags=33%, list=36%, signal=51%
RNA1-S116F_SGA	28	-0.152907	-0.507947	0.985893	1	1	301	tags=25%, list=28%, signal=34%
RPS6A_BIND	28	-0.152633	-0.501865	0.98209	1	1	509	tags=39%, list=48%, signal=73%
LIGASE ACTIVITY_MOL	36	-0.143554	-0.500098	0.995714	1	1	167	tags=14%, list=16%, signal=16%
ELP2_BIND	32	-0.141197	-0.491481	0.995665	1	1	444	tags=41%, list=42%, signal=68%
PBS2_SGA	45	-0.133452	-0.490248	0.997175	1	1	217	tags=16%, list=20%, signal=19%
SMC3-1_SGA	17	-0.169216	-0.489276	0.987179	1	1	887	tags=100%, list=83%, signal=594%
THR4_SGA	43	-0.13428	-0.485014	0.998584	1	1	139	tags=9%, list=13%, signal=10%
NUM1_BIND	15	-0.170943	-0.4836	0.9875	1	1	371	tags=40%, list=35%, signal=61%
YIL083C_DAMP_SGA	22	-0.151641	-0.482631	0.992026	1	1	341	tags=32%, list=32%, signal=46%
TAF1-1_SGA	19	-0.158723	-0.477111	0.990937	1	1	462	tags=47%, list=43%, signal=82%
RIM8_BIND	31	-0.139923	-0.473165	0.994074	1	1	357	tags=29%, list=34%, signal=42%
RFX1P_TFMOTIF	18	-0.160309	-0.471523	0.990099	1	1	248	tags=22%, list=23%, signal=28%
HIR3_BIND	19	-0.153961	-0.460098	0.992013	1	1	462	tags=47%, list=43%, signal=82%
RNA15-58_SGA	31	-0.13306	-0.459817	1	1	1	494	tags=52%, list=46%, signal=94%
AIM4_BIND	15	-0.162605	-0.457269	0.993912	1	1	442	tags=47%, list=42%, signal=79%
SNF6_BIND	16	-0.158548	-0.455908	0.988391	1	1	898	tags=100%, list=84%, signal=635%
ASK10_BIND	26	-0.140851	-0.451926	0.992481	1	1	222	tags=19%, list=21%, signal=24%
MTO1_SGA	18	-0.148981	-0.444736	0.99682	1	1	318	tags=33%, list=30%, signal=47%
UBP6_BIND	40	-0.12299	-0.444304	0.998534	1	1	430	tags=40%, list=40%, signal=65%
GUS1_BIND	15	-0.154101	-0.440395	0.99685	1	1	356	tags=33%, list=33%, signal=49%
CBT1_BIND	16	-0.152078	-0.440331	0.993579	1	1	506	tags=44%, list=48%, signal=82%
SET2_BIND	22	-0.141571	-0.439025	0.996795	1	1	212	tags=18%, list=20%, signal=22%
ARP1_BIND	15	-0.153734	-0.437793	0.998333	1	1	132	tags=13%, list=12%, signal=15%
FMP52_SGA	16	-0.151343	-0.433399	0.99681	1	1	129	tags=13%, list=12%, signal=14%
KAR3_SGA	19	-0.143891	-0.432632	1	1	1	402	tags=37%, list=38%, signal=58%
SDC1_BIND	20	-0.138941	-0.431439	0.996894	1	1	400	tags=40%, list=38%, signal=63%
PURINE NUCLEOTIDE BINDING_MOL	15	-0.152615	-0.428591	0.990536	1	1	453	tags=47%, list=43%, signal=80%
TEA1P_TFMOTIF	52	-0.111137	-0.418636	1	1	1	97	tags=8%, list=9%, signal=8%
SPT16_BIND	26	-0.129472	-0.416934	0.998397	1	1	862	tags=96%, list=81%, signal=496%
CDC5_9H_DN	33	-0.120861	-0.414944	0.998525	1	1	422	tags=33%, list=40%, signal=54%
PRP16-TS_SGA	42	-0.114549	-0.412345	0.998551	1	1	355	tags=26%, list=33%, signal=38%
HYP2-1_SGA	17	-0.139326	-0.407639	0.990385	1	1	478	tags=53%, list=45%, signal=95%
PDB1_BIND	18	-0.135804	-0.403791	1	1	1	239	tags=17%, list=22%, signal=21%
AIM22_BIND	15	-0.141466	-0.400124	0.99839	1	1	163	tags=13%, list=15%, signal=16%
EMI2_SGA	24	-0.121679	-0.394673	1	1	1	30	tags=4%, list=3%, signal=4%
RTS1_BIND	15	-0.130481	-0.37735	1	1	1	163	tags=13%, list=15%, signal=16%
NUCLEOTIDE BINDING_MOL	16	-0.12179	-0.354494	0.998466	0.999757	1	400	tags=38%, list=38%, signal=59%

## Sheet: GSEA sth1 DIA-MS pos
NAME	SIZE	ES	NES	NOM p-val	FDR q-val	FWER p-val	RANK AT MAX	LEADING EDGE
T4 BUTYRIC-VS-CONTROL_UP	106	0.630907	3.20101	0	0	0	235	tags=64%, list=22%, signal=74%
T4 PROPIONIC-VS-CONTROL_UP	94	0.618244	3.08125	0	0	0	234	tags=62%, list=22%, signal=72%
T4 ACETIC-VS-CONTROL_UP	82	0.624	3.01602	0	0	0	205	tags=59%, list=19%, signal=67%
T1 BUTYRIC-VS-CONTROL_UP	54	0.660915	2.93274	0	0	0	196	tags=67%, list=18%, signal=78%
T1 PROPIONIC-VS-CONTROL_UP	72	0.617297	2.93104	0	0	0	234	tags=67%, list=22%, signal=80%
SAK1-UP	81	0.591329	2.86434	0	0	0	236	tags=57%, list=22%, signal=67%
GLD_UP	59	0.627145	2.85781	0	0	0	235	tags=71%, list=22%, signal=86%
CYR1_HYPHAE_UP	91	0.57588	2.85035	0	0	0	308	tags=74%, list=29%, signal=95%
KETOCONAZOLE_UP	47	0.663347	2.81665	0	0	0	191	tags=62%, list=18%, signal=72%
T4 LACTIC-VS-CONTROL_UP	43	0.658605	2.74362	0	0	0	232	tags=74%, list=22%, signal=91%
OS(2006)_UP	58	0.620969	2.73675	0	0	0	235	tags=64%, list=22%, signal=77%
SWI4SWI6_UP	89	0.540567	2.63063	0	0	0	236	tags=60%, list=22%, signal=70%
XS_UP	38	0.642304	2.62895	0	0	0	211	tags=63%, list=20%, signal=76%
RAS1_YEAST_UP	29	0.685081	2.57187	0	0	0	305	tags=90%, list=29%, signal=122%
UPC2_UP	48	0.604688	2.56923	0	0	0	201	tags=69%, list=19%, signal=81%
OPAQUE_2_UP	29	0.678463	2.55711	0	5.50442e-05	0.001	200	tags=69%, list=19%, signal=83%
OS(HOG1)_UP	30	0.662132	2.55193	0	5.18063e-05	0.001	185	tags=67%, list=17%, signal=78%
YAK1_Y_DN	87	0.531811	2.54825	0	4.89282e-05	0.001	269	tags=63%, list=25%, signal=78%
CELL WALL_CEL	47	0.588328	2.52174	0	4.6353e-05	0.001	294	tags=64%, list=28%, signal=84%
EXTERNAL ENCAPSULATING STRUCTURE_CEL	47	0.588328	2.51692	0	4.40353e-05	0.001	294	tags=64%, list=28%, signal=84%
PROTEIN CATABOLIC PROCESS_BIO	25	0.673387	2.47231	0	4.19384e-05	0.001	221	tags=68%, list=21%, signal=84%
T1 ACETIC-VS-CONTROL_UP	32	0.636341	2.44351	0	0.00016955	0.004	179	tags=66%, list=17%, signal=77%
CELLULAR PROTEIN CATABOLIC PROCESS_BIO	21	0.677034	2.41319	0	0.000247012	0.006	221	tags=71%, list=21%, signal=88%
ENDOPEPTIDASE ACTIVITY_MOL	18	0.706056	2.40438	0	0.000277104	0.007	221	tags=72%, list=21%, signal=90%
OS_UP	52	0.547652	2.39702	0	0.00026602	0.007	305	tags=77%, list=29%, signal=103%
CHITIN- AND BETA-GLUCAN-CONTAINING CELL WALL_CEL	44	0.557273	2.39383	0	0.000292123	0.008	386	tags=86%, list=36%, signal=130%
CD_UP	38	0.562683	2.34752	0	0.000488094	0.014	245	tags=61%, list=23%, signal=76%
CDC5_7H_UP	86	0.478773	2.34148	0	0.000470662	0.014	309	tags=65%, list=29%, signal=84%
SNF6-DOWN-37C	99	0.47253	2.33461	0	0.000454432	0.014	207	tags=47%, list=19%, signal=53%
CLA30_UP	30	0.607652	2.31466	0	0.000499513	0.016	233	tags=63%, list=22%, signal=79%
MODIFICATION-DEPENDENT MACROMOLECULE CATABOLIC PROCESS_BIO	17	0.695696	2.30959	0	0.000510454	0.017	221	tags=76%, list=21%, signal=95%
PROTEOLYSIS INVOLVED IN CELLULAR PROTEIN CATABOLIC PROCESS_BIO	17	0.695696	2.29974	0	0.000551586	0.019	221	tags=76%, list=21%, signal=95%
PROTEASOME COMPLEX (SENSU EUKARYOTA)_CEL	17	0.694373	2.28265	0	0.000646625	0.023	221	tags=71%, list=21%, signal=88%
YAK1_H_UP	76	0.473486	2.26454	0	0.000900023	0.031	175	tags=47%, list=16%, signal=53%
CLA37_UP	55	0.520168	2.26329	0	0.000926117	0.033	289	tags=67%, list=27%, signal=88%
CD(HOG1)_UP	29	0.597746	2.24352	0.00280112	0.00108217	0.04	245	tags=62%, list=23%, signal=78%
MODIFICATION-DEPENDENT PROTEIN CATABOLIC PROCESS_BIO	17	0.695696	2.24286	0	0.00105292	0.04	221	tags=76%, list=21%, signal=95%
UBIQUITIN-DEPENDENT PROTEIN CATABOLIC PROCESS_BIO	17	0.695696	2.2259	0	0.00136794	0.053	221	tags=76%, list=21%, signal=95%
ADA2_TF	69	0.471799	2.19083	0	0.00179099	0.071	270	tags=48%, list=25%, signal=60%
HYPHAL CELL WALL_CEL	23	0.612348	2.13443	0.00277778	0.00387854	0.152	383	tags=87%, list=36%, signal=133%
MED31_UP	16	0.655733	2.10875	0.00271003	0.00482468	0.192	218	tags=63%, list=21%, signal=77%
CDC5_9H_UP	45	0.503867	2.09946	0	0.0052618	0.21	309	tags=67%, list=29%, signal=90%
HYPHAE_DN	55	0.451939	2.08225	0	0.00617961	0.243	181	tags=40%, list=17%, signal=46%
TAC1_DN	17	0.631555	2.08202	0.00266667	0.00605957	0.244	232	tags=65%, list=22%, signal=81%
T1 LACTIC-VS-CONTROL_UP	40	0.50096	2.08107	0	0.00594567	0.245	232	tags=58%, list=22%, signal=71%
HYPHAE_FBS_37_UP	16	0.646786	2.07898	0	0.00593879	0.25	168	tags=63%, list=16%, signal=73%
SEC27_BIND	17	0.632158	2.0603	0	0.0070944	0.298	217	tags=59%, list=20%, signal=73%
RPN7_BIND	15	0.67297	2.06026	0	0.0069466	0.298	221	tags=73%, list=21%, signal=91%
PROTEOLYSIS_BIO	22	0.580932	2.0552	0	0.00702955	0.307	221	tags=64%, list=21%, signal=79%
PEPTIDASE ACTIVITY_MOL	28	0.550747	2.04025	0	0.00815811	0.348	299	tags=64%, list=28%, signal=87%
CYR1_YEAST_UP	99	0.399311	2.02965	0	0.00865242	0.371	308	tags=54%, list=29%, signal=68%
OPAQUE_UP	21	0.565577	1.98917	0.00287356	0.0128111	0.507	181	tags=57%, list=17%, signal=68%
ZAP1_DN	54	0.443598	1.98852	0	0.0126389	0.51	261	tags=48%, list=25%, signal=61%
HYPOXIA_SETIADI_UP	21	0.564261	1.97487	0	0.0142182	0.563	384	tags=86%, list=36%, signal=132%
INTERACTION WITH HOST_BIO	21	0.581138	1.96814	0.00288184	0.0148014	0.588	290	tags=57%, list=27%, signal=77%
PUP2_BIND	16	0.597928	1.955	0	0.0164227	0.636	221	tags=63%, list=21%, signal=78%
PRE10_BIND	20	0.569436	1.95226	0.00277008	0.0166437	0.648	212	tags=55%, list=20%, signal=67%
HU_2H_UP	30	0.514341	1.95165	0	0.0164052	0.648	218	tags=57%, list=21%, signal=69%
HU_6H_UP	56	0.432253	1.93957	0	0.0181761	0.701	247	tags=55%, list=23%, signal=68%
GAL4_UP	74	0.41483	1.93833	0	0.0180263	0.703	212	tags=46%, list=20%, signal=53%
PSEUDOMONAS_DN	16	0.606099	1.92676	0	0.0196036	0.736	115	tags=44%, list=11%, signal=48%
GCN4_GCN2_UP	36	0.475299	1.91972	0	0.0205309	0.759	299	tags=61%, list=28%, signal=82%
HYPOXIA_SYNNOTT_UP	58	0.421992	1.88909	0	0.0276017	0.854	234	tags=52%, list=22%, signal=63%
BMDM PHAGOCYTOSIS_UP	110	0.366799	1.87556	0	0.0307053	0.883	239	tags=45%, list=22%, signal=53%
CDC53_DN	53	0.432714	1.8712	0.00326797	0.0314164	0.892	189	tags=55%, list=18%, signal=63%
RPH1P_TFMOTIF	52	0.423321	1.8675	0.00348432	0.0317506	0.9	119	tags=27%, list=11%, signal=29%
NITROSATIVE STRESS	16	0.584875	1.85279	0.0026178	0.0354773	0.929	211	tags=69%, list=20%, signal=84%
WOR1_TF	27	0.487611	1.83741	0.00597015	0.0394508	0.949	148	tags=41%, list=14%, signal=46%
SNF6-DOWN-30C	20	0.555964	1.83442	0.00833333	0.0397518	0.952	162	tags=50%, list=15%, signal=58%
TEC1_BIOFILM_TF	20	0.546032	1.82981	0.00306748	0.0406342	0.958	134	tags=45%, list=13%, signal=51%
GOLGI VESICLE TRANSPORT_BIO	18	0.549781	1.81447	0.0078329	0.0452311	0.971	341	tags=78%, list=32%, signal=113%
XS(HOG1)_UP	104	0.359489	1.81438	0	0.0446678	0.971	183	tags=37%, list=17%, signal=40%
PRE5_BIND	16	0.570554	1.81314	0.00558659	0.0445536	0.972	221	tags=56%, list=21%, signal=70%
XS(2006)_UP	103	0.364878	1.81137	0	0.044573	0.973	185	tags=36%, list=17%, signal=39%
RPN12_BIND	16	0.554662	1.80575	0.00773196	0.0458875	0.976	344	tags=75%, list=32%, signal=109%
PRE8_BIND	15	0.57525	1.78055	0.0121212	0.0553129	0.988	221	tags=60%, list=21%, signal=75%
SCH9-DO_HPX	25	0.487898	1.77835	0.0106667	0.055587	0.989	164	tags=56%, list=15%, signal=65%
EXTERNAL ENCAPSULATING STRUCTURE ORGANIZATION AND BIOGENESIS_BIO	31	0.444616	1.77505	0	0.0563174	0.99	301	tags=65%, list=28%, signal=87%
REGULATION OF TRANSCRIPTION FROM RNA POLYMERASE II PROMOTER_BIO	18	0.539817	1.75814	0.0103627	0.0627804	0.993	99	tags=28%, list=9%, signal=30%
RPN11_BIND	20	0.515144	1.7532	0.0027027	0.0646475	0.997	288	tags=65%, list=27%, signal=87%
PROTEIN FOLDING_BIO	22	0.49948	1.75255	0.00543478	0.0642636	0.998	283	tags=64%, list=27%, signal=85%
RPT1_BIND	21	0.501235	1.7482	0.0110803	0.0656192	0.998	288	tags=57%, list=27%, signal=77%
COG5_BIND	22	0.494133	1.74197	0.00595238	0.067897	0.999	328	tags=68%, list=31%, signal=97%
CELL WALL ORGANIZATION AND BIOGENESIS_BIO	31	0.444616	1.73296	0.00588235	0.071807	0.999	301	tags=65%, list=28%, signal=87%
MACROMOLECULE CATABOLIC PROCESS_BIO	51	0.396731	1.72394	0	0.0756156	1	221	tags=39%, list=21%, signal=47%
ASPARTATE FAMILY AMINO ACID METABOLIC PROCESS_BIO	15	0.544482	1.70398	0.025	0.0859147	1	329	tags=67%, list=31%, signal=95%
CELLULAR BUD_CEL	17	0.532784	1.70314	0.0134048	0.0854737	1	142	tags=41%, list=13%, signal=47%
RPT4_BIND	20	0.498359	1.69891	0.0204082	0.0870991	1	300	tags=60%, list=28%, signal=82%
YEAST-FORM CELL WALL_CEL	19	0.499794	1.69575	0.0191781	0.0882694	1	262	tags=47%, list=25%, signal=62%
RPT5_BIND	23	0.471256	1.69127	0.0141243	0.090576	1	314	tags=61%, list=30%, signal=85%
HS_UP	41	0.413173	1.68947	0.00682594	0.0906033	1	206	tags=54%, list=19%, signal=64%
SITE OF POLARIZED GROWTH_CEL	17	0.532784	1.6875	0.0257732	0.0907262	1	142	tags=41%, list=13%, signal=47%
CWT1_STATPHASE_UP	19	0.489351	1.68213	0.0215054	0.093271	1	148	tags=32%, list=14%, signal=36%
CATABOLIC PROCESS_BIO	76	0.35038	1.68008	0	0.0936136	1	221	tags=37%, list=21%, signal=43%
CARBOHYDRATE METABOLIC PROCESS_BIO	45	0.388864	1.67723	0.00334448	0.0944477	1	322	tags=53%, list=30%, signal=73%
PMN PHAGOCYTOSIS_UP	65	0.36404	1.67455	0	0.0952341	1	245	tags=48%, list=23%, signal=58%
VACUOLE_CEL	18	0.495728	1.66829	0.00731707	0.0983081	1	109	tags=39%, list=10%, signal=43%
RPT6_BIND	25	0.468824	1.65515	0.0191083	0.106483	1	243	tags=48%, list=23%, signal=61%
SCL1_BIND	19	0.481238	1.64351	0.0134771	0.114357	1	221	tags=53%, list=21%, signal=65%
PRE6_BIND	17	0.508545	1.64241	0.0240642	0.114106	1	221	tags=53%, list=21%, signal=66%
PMT1_CAP1-312_UP	15	0.509843	1.64093	0.0273632	0.113974	1	163	tags=47%, list=15%, signal=54%
CELL COMMUNICATION_BIO	16	0.489224	1.63255	0.0335196	0.11952	1	220	tags=56%, list=21%, signal=70%
RHE90_UP	67	0.352815	1.63029	0.00381679	0.120229	1	205	tags=46%, list=19%, signal=54%
ZAP1_UP	44	0.375088	1.59928	0.00619195	0.145816	1	191	tags=34%, list=18%, signal=40%
RPN10_BIND	43	0.385994	1.5938	0.0131579	0.149315	1	221	tags=44%, list=21%, signal=54%
RESPONSE TO STIMULUS_BIO	76	0.327644	1.59025	0.00371747	0.151357	1	225	tags=38%, list=21%, signal=45%
CUP2P_TFMOTIF	18	0.481211	1.58865	0.0348525	0.151492	1	281	tags=67%, list=26%, signal=89%
ARL1_BIND	24	0.43844	1.55759	0.0358209	0.18265	1	283	tags=58%, list=27%, signal=78%
WHITE_2_UP	63	0.340825	1.55407	0.013468	0.184848	1	195	tags=40%, list=18%, signal=46%
TYE7-UP-HPX	62	0.350474	1.55184	0.0136519	0.185658	1	290	tags=50%, list=27%, signal=65%
PROTEIN COMPLEX ASSEMBLY_BIO	24	0.435686	1.55172	0.0502959	0.184185	1	360	tags=71%, list=34%, signal=105%
TLG2_BIND	27	0.410495	1.54634	0.0241692	0.188625	1	209	tags=44%, list=20%, signal=54%
SOLUBLE FRACTION_CEL	36	0.38352	1.5454	0.0240964	0.187993	1	398	tags=78%, list=37%, signal=120%
RESPONSE TO CHEMICAL STIMULUS_BIO	43	0.370447	1.54526	0.025641	0.186516	1	225	tags=42%, list=21%, signal=51%
IRE1_BIND	25	0.417185	1.54403	0.030303	0.186222	1	225	tags=56%, list=21%, signal=69%
SECRETION BY CELL_BIO	28	0.408199	1.54021	0.0414201	0.18886	1	208	tags=50%, list=20%, signal=61%
SYMBIOSIS, ENCOMPASSING MUTUALISM THROUGH PARASITISM_BIO	45	0.356641	1.53657	0.0254777	0.191346	1	222	tags=36%, list=21%, signal=43%
SECRETORY PATHWAY_BIO	28	0.408199	1.53436	0.0364583	0.192036	1	208	tags=50%, list=20%, signal=61%
CELLULAR MACROMOLECULE CATABOLIC PROCESS_BIO	47	0.35689	1.53431	0.0231788	0.190477	1	221	tags=38%, list=21%, signal=46%
EFG1_HYPHAE_UP	15	0.472635	1.53155	0.0555556	0.192205	1	227	tags=47%, list=21%, signal=59%
ENT5_BIND	15	0.482796	1.5297	0.0349854	0.192627	1	273	tags=47%, list=26%, signal=62%
RIM101P_TFMOTIF	54	0.350875	1.52792	0.0259259	0.193012	1	324	tags=56%, list=30%, signal=76%
RESPONSE TO STRESS_BIO	61	0.335262	1.52603	0.0103448	0.193712	1	158	tags=33%, list=15%, signal=36%
RHE30_UP	38	0.378455	1.52415	0.0283019	0.194033	1	233	tags=55%, list=22%, signal=68%
HYPHAE_SPIDER_UP	53	0.345038	1.51836	0.02	0.19907	1	217	tags=49%, list=20%, signal=59%
CELLULAR CATABOLIC PROCESS_BIO	72	0.31957	1.51818	0.00816326	0.197719	1	221	tags=36%, list=21%, signal=43%
RPN1_BIND	21	0.437079	1.5173	0.0459459	0.197113	1	344	tags=62%, list=32%, signal=90%
RPN8_BIND	18	0.451441	1.5171	0.0446927	0.195769	1	221	tags=50%, list=21%, signal=62%
AHR1_TF	33	0.383913	1.50539	0.0347826	0.208159	1	185	tags=33%, list=17%, signal=39%
SECRETION_BIO	28	0.408199	1.50505	0.0381232	0.207042	1	208	tags=50%, list=20%, signal=61%
TRANSCRIPTION FROM RNA POLYMERASE II PROMOTER_BIO	25	0.41791	1.49874	0.0449438	0.213098	1	99	tags=20%, list=9%, signal=22%
INTERSPECIES INTERACTION BETWEEN ORGANISMS_BIO	45	0.356641	1.49851	0.0328947	0.211724	1	222	tags=36%, list=21%, signal=43%
SMT3_BIND	16	0.474892	1.49554	0.0741688	0.213674	1	300	tags=50%, list=28%, signal=69%
BIOPOLYMER CATABOLIC PROCESS_BIO	42	0.356517	1.4927	0.0278638	0.215311	1	221	tags=40%, list=21%, signal=49%
TPS1_BIND	21	0.433868	1.47988	0.0779944	0.229852	1	37	tags=19%, list=3%, signal=19%
ENDOPLASMIC RETICULUM_CEL	32	0.379826	1.45943	0.0526316	0.255675	1	170	tags=38%, list=16%, signal=43%
RPT3_BIND	22	0.415557	1.45792	0.047486	0.256044	1	288	tags=64%, list=27%, signal=85%
CA21CHR2X7	24	0.406649	1.43814	0.0542857	0.283158	1	63	tags=21%, list=6%, signal=22%
GSM1P_TFMOTIF	103	0.28032	1.433	0.0042735	0.289316	1	331	tags=47%, list=31%, signal=61%
RHO2_SGA	17	0.433924	1.43217	0.0603675	0.288584	1	194	tags=41%, list=18%, signal=50%
POST-TRANSLATIONAL PROTEIN MODIFICATION_BIO	25	0.396821	1.42123	0.0727273	0.303797	1	247	tags=44%, list=23%, signal=56%
CELL SURFACE_CEL	42	0.33986	1.42027	0.0555556	0.303201	1	386	tags=76%, list=36%, signal=115%
GOLGI APPARATUS PART_CEL	15	0.467432	1.41741	0.100503	0.305638	1	208	tags=53%, list=20%, signal=65%
PATHOGENESIS_BIO	30	0.369288	1.4056	0.0784884	0.323384	1	99	tags=27%, list=9%, signal=29%
MULTI-ORGANISM PROCESS_BIO	54	0.311598	1.39913	0.0283912	0.332127	1	259	tags=39%, list=24%, signal=49%
SMC1-259_SGA	17	0.430982	1.39644	0.110169	0.334847	1	287	tags=47%, list=27%, signal=63%
GSG1_BIND	30	0.361229	1.39385	0.0630915	0.336888	1	219	tags=40%, list=21%, signal=49%
GI COLONIZATION-UP	77	0.290862	1.39297	0.0361446	0.336117	1	207	tags=36%, list=19%, signal=42%
CA21CHR6X5	20	0.407175	1.39214	0.0944444	0.335187	1	107	tags=30%, list=10%, signal=33%
VESICLE-MEDIATED TRANSPORT_BIO	31	0.352431	1.38844	0.0990991	0.339426	1	208	tags=35%, list=20%, signal=43%
SYS1_BIND	20	0.389589	1.38471	0.0947075	0.343856	1	209	tags=50%, list=20%, signal=61%
CDC5_4H_UP	46	0.330817	1.38223	0.0503145	0.345796	1	290	tags=50%, list=27%, signal=66%
COG6_BIND	23	0.38639	1.37385	0.0773481	0.359115	1	277	tags=52%, list=26%, signal=69%
RAD23_BIND	15	0.447927	1.36804	0.124277	0.367543	1	221	tags=53%, list=21%, signal=66%
CICLOPIROX_OLAMINE_UP	15	0.439345	1.36733	0.118132	0.366457	1	191	tags=47%, list=18%, signal=56%
RPN3_BIND	17	0.410648	1.35661	0.113703	0.384844	1	221	tags=47%, list=21%, signal=58%
SIC1_SGA	18	0.400453	1.35513	0.109589	0.385074	1	222	tags=33%, list=21%, signal=41%
CARBOXYLIC ACID METABOLIC PROCESS_BIO	93	0.272785	1.3521	0.0292887	0.3887	1	331	tags=46%, list=31%, signal=61%
MONOSACCHARIDE METABOLIC PROCESS_BIO	18	0.40286	1.35175	0.119681	0.386851	1	384	tags=72%, list=36%, signal=111%
RPN2_BIND	22	0.387069	1.35031	0.122449	0.387064	1	221	tags=41%, list=21%, signal=51%
RPL17B_BIND	18	0.408923	1.34803	0.100279	0.389079	1	217	tags=33%, list=20%, signal=41%
STI1_BIND	15	0.432586	1.34752	0.120823	0.387668	1	324	tags=67%, list=30%, signal=95%
CCR4_DN	40	0.331418	1.34725	0.0962733	0.385781	1	310	tags=60%, list=29%, signal=82%
CELLULAR CARBOHYDRATE METABOLIC PROCESS_BIO	41	0.326855	1.34719	0.057508	0.383558	1	322	tags=49%, list=30%, signal=67%
SEC28_BIND	27	0.36937	1.34709	0.0934844	0.381482	1	333	tags=59%, list=31%, signal=84%
GOLGI APPARATUS_CEL	17	0.417233	1.34695	0.134454	0.379447	1	116	tags=35%, list=11%, signal=39%
FPS1_BIND	24	0.381346	1.34674	0.0811594	0.377558	1	344	tags=58%, list=32%, signal=84%
HEXOSE METABOLIC PROCESS_BIO	18	0.40286	1.34021	0.133515	0.387361	1	384	tags=72%, list=36%, signal=111%
ORGANIC ACID METABOLIC PROCESS_BIO	93	0.272785	1.33358	0.0550847	0.397778	1	331	tags=46%, list=31%, signal=61%
RESPONSE TO ABIOTIC STIMULUS_BIO	23	0.37296	1.33296	0.111446	0.396575	1	106	tags=35%, list=10%, signal=38%
ARC18_BIND	17	0.403925	1.32301	0.128947	0.414144	1	294	tags=47%, list=28%, signal=64%
HSC82_BIND	45	0.307985	1.31872	0.0915033	0.42072	1	285	tags=36%, list=27%, signal=47%
CELLULAR BUD NECK_CEL	16	0.410619	1.31651	0.165266	0.4227	1	142	tags=38%, list=13%, signal=43%
RET2-1_SGA	17	0.393599	1.30955	0.15896	0.434681	1	138	tags=29%, list=13%, signal=33%
MONOCARBOXYLIC ACID METABOLIC PROCESS_BIO	30	0.347113	1.30922	0.113497	0.432846	1	260	tags=47%, list=24%, signal=60%
BRR1_BIND	21	0.380642	1.30535	0.133903	0.438078	1	288	tags=57%, list=27%, signal=77%
ALT1_BIND	20	0.372249	1.29755	0.134409	0.451659	1	101	tags=25%, list=10%, signal=27%
CYTOKINESIS_BIO	17	0.387191	1.29043	0.160237	0.46456	1	148	tags=41%, list=14%, signal=47%
HAC1_BIND	19	0.386167	1.287	0.150649	0.469393	1	163	tags=47%, list=15%, signal=55%
ERG2_BIND	22	0.365229	1.27293	0.16338	0.498313	1	225	tags=45%, list=21%, signal=56%
BIOFILMBATCH_UP	54	0.295133	1.27077	0.141818	0.500227	1	168	tags=35%, list=16%, signal=40%
IME1P_TFMOTIF	88	0.259312	1.26173	0.0692308	0.518914	1	307	tags=45%, list=29%, signal=59%
PHOSPHORYLATION_BIO	17	0.384488	1.26091	0.199461	0.517984	1	21	tags=12%, list=2%, signal=12%
PHO80_SGA	27	0.331189	1.25614	0.17094	0.526181	1	292	tags=48%, list=27%, signal=65%
OXIDOREDUCTASE ACTIVITY_MOL	94	0.254343	1.25594	0.0898438	0.523774	1	146	tags=28%, list=14%, signal=29%
RAS2_BIND	16	0.394243	1.25324	0.176781	0.527423	1	229	tags=44%, list=22%, signal=55%
RESPONSE TO OXIDATIVE STRESS_BIO	22	0.350095	1.25233	0.168508	0.526896	1	197	tags=41%, list=19%, signal=49%
PLASMA MEMBRANE_CEL	33	0.315115	1.24791	0.16185	0.53449	1	110	tags=24%, list=10%, signal=26%
CA21CHR1X7	15	0.390648	1.24166	0.209677	0.546855	1	36	tags=20%, list=3%, signal=20%
COG7_BIND	18	0.369608	1.24062	0.194203	0.546618	1	279	tags=50%, list=26%, signal=67%
RPN13_BIND	15	0.405487	1.237	0.21374	0.552587	1	288	tags=67%, list=27%, signal=90%
REGULATION OF BIOLOGICAL PROCESS_BIO	60	0.274012	1.23246	0.150538	0.560967	1	99	tags=18%, list=9%, signal=19%
LIP5_BIND	30	0.322377	1.23227	0.18018	0.558527	1	128	tags=20%, list=12%, signal=22%
OAF1P_TFMOTIF	16	0.385863	1.2321	0.189974	0.556109	1	200	tags=44%, list=19%, signal=53%
CELL DIVISION_BIO	24	0.34471	1.22835	0.190083	0.56301	1	148	tags=38%, list=14%, signal=43%
CA21CHR1X4	35	0.311731	1.22598	0.177019	0.566057	1	138	tags=29%, list=13%, signal=32%
GAL4_TF	34	0.305165	1.2235	0.190616	0.569699	1	237	tags=29%, list=22%, signal=37%
RESPONSE TO OSMOTIC STRESS_BIO	15	0.39142	1.22244	0.21229	0.569297	1	106	tags=40%, list=10%, signal=44%
CELL FRACTION_CEL	55	0.276304	1.21736	0.139194	0.579085	1	398	tags=67%, list=37%, signal=102%
VPS29_BIND	17	0.37525	1.2153	0.207386	0.581333	1	198	tags=35%, list=19%, signal=43%
SMC1-2_SGA	19	0.355361	1.21463	0.208914	0.580154	1	290	tags=42%, list=27%, signal=57%
TRANSCRIPTION REGULATOR ACTIVITY_MOL	29	0.316902	1.21403	0.202532	0.578943	1	99	tags=17%, list=9%, signal=18%
PHOSPHORUS METABOLIC PROCESS_BIO	19	0.355484	1.21063	0.210674	0.585121	1	21	tags=11%, list=2%, signal=11%
OXYGEN AND REACTIVE OXYGEN SPECIES METABOLIC PROCESS_BIO	22	0.350095	1.20804	0.215517	0.589149	1	197	tags=41%, list=19%, signal=49%
GET3_BIND	30	0.319281	1.20757	0.223242	0.587547	1	283	tags=57%, list=27%, signal=75%
BCR1_TF	47	0.286622	1.20687	0.182482	0.586528	1	134	tags=17%, list=13%, signal=19%
ECM29_BIND	19	0.350557	1.20499	0.26	0.588618	1	314	tags=42%, list=30%, signal=59%
ERD1_SGA	26	0.327127	1.19896	0.21988	0.601101	1	129	tags=31%, list=12%, signal=34%
CDC53_UP	47	0.281792	1.19867	0.187097	0.598891	1	282	tags=47%, list=27%, signal=61%
SWC3_SGA	29	0.315446	1.19817	0.205556	0.597306	1	132	tags=17%, list=12%, signal=19%
CA21CHR1X3	24	0.331049	1.19575	0.237805	0.600607	1	172	tags=33%, list=16%, signal=39%
YDR049W_BIND	19	0.352229	1.19517	0.223464	0.599247	1	283	tags=47%, list=27%, signal=63%
VMA8_SGA	36	0.301035	1.18816	0.202417	0.6149	1	139	tags=25%, list=13%, signal=28%
VPS5_SGA	17	0.362974	1.18745	0.208333	0.613964	1	174	tags=35%, list=16%, signal=42%
PHB2_BIND	23	0.345562	1.18492	0.223837	0.617814	1	292	tags=57%, list=27%, signal=76%
PHOSPHATE METABOLIC PROCESS_BIO	19	0.355484	1.18183	0.248649	0.623	1	21	tags=11%, list=2%, signal=11%
YJL160C_BIND	20	0.342054	1.17807	0.241848	0.630092	1	105	tags=20%, list=10%, signal=22%
EUKARYOTIC 48S INITIATION COMPLEX_CEL	15	0.369788	1.17702	0.250681	0.630004	1	132	tags=13%, list=12%, signal=15%
SKO1_UP	88	0.238666	1.17681	0.160305	0.627784	1	238	tags=38%, list=22%, signal=44%
DNA BINDING_MOL	17	0.352643	1.17409	0.237598	0.632263	1	213	tags=35%, list=20%, signal=43%
REGULATION OF CELLULAR PROCESS_BIO	58	0.259927	1.17377	0.170213	0.630275	1	99	tags=17%, list=9%, signal=18%
DUN1_SGA	16	0.366993	1.16771	0.283379	0.644129	1	252	tags=44%, list=24%, signal=56%
REGULATION OF TRANSCRIPTION, DNA-DEPENDENT_BIO	33	0.291558	1.1626	0.228659	0.655267	1	99	tags=18%, list=9%, signal=19%
YOR1_BIND	16	0.357087	1.16171	0.275862	0.654649	1	222	tags=38%, list=21%, signal=47%
REGULATION OF METABOLIC PROCESS_BIO	46	0.273004	1.1608	0.247525	0.654507	1	99	tags=17%, list=9%, signal=18%
CA21CHRRX1	20	0.340889	1.16075	0.258064	0.651782	1	168	tags=40%, list=16%, signal=47%
CYTOSOLIC SMALL RIBOSOMAL SUBUNIT (SENSU EUKARYOTA)_CEL	15	0.369788	1.15751	0.307278	0.657814	1	132	tags=13%, list=12%, signal=15%
REGULATION OF NUCLEOBASE, NUCLEOSIDE, NUCLEOTIDE AND NUCLEIC ACID METABOLIC PROCESS_BIO	38	0.288651	1.15589	0.214533	0.659354	1	99	tags=18%, list=9%, signal=20%
ATPASE ACTIVITY, COUPLED TO MOVEMENT OF SUBSTANCES_MOL	18	0.345284	1.15497	0.267016	0.658878	1	1	tags=6%, list=0%, signal=5%
MCM1_TF	65	0.251896	1.15414	0.174658	0.658184	1	163	tags=29%, list=15%, signal=32%
SWF1_SGA	31	0.300234	1.14977	0.23839	0.667241	1	139	tags=26%, list=13%, signal=29%
TOM70_SGA	20	0.34063	1.14354	0.246499	0.681941	1	263	tags=45%, list=25%, signal=59%
REGULATION OF CELLULAR METABOLIC PROCESS_BIO	42	0.270218	1.14201	0.208861	0.683282	1	99	tags=17%, list=9%, signal=18%
ATPASE ACTIVITY, COUPLED TO TRANSMEMBRANE MOVEMENT OF SUBSTANCES_MOL	18	0.345284	1.13865	0.263441	0.689791	1	1	tags=6%, list=0%, signal=5%
APM3_SGA	21	0.317211	1.13818	0.275072	0.688081	1	18	tags=10%, list=2%, signal=9%
SSD1_BIND	39	0.273752	1.13813	0.25974	0.685264	1	110	tags=18%, list=10%, signal=19%
LCB5_SGA	18	0.333139	1.13509	0.289544	0.690982	1	129	tags=28%, list=12%, signal=31%
ORGANELLE INNER MEMBRANE_CEL	26	0.30885	1.13193	0.252149	0.697083	1	30	tags=12%, list=3%, signal=12%
AMINO ACID METABOLIC PROCESS_BIO	65	0.244429	1.13163	0.246479	0.695069	1	331	tags=42%, list=31%, signal=57%
REGULATION OF TRANSCRIPTION_BIO	33	0.291558	1.12911	0.269113	0.699198	1	99	tags=18%, list=9%, signal=19%
MITOCHONDRIAL MEMBRANE_CEL	28	0.296192	1.1286	0.266467	0.6977	1	30	tags=11%, list=3%, signal=11%
HYDROLASE ACTIVITY, ACTING ON ACID ANHYDRIDES, CATALYZING TRANSMEMBRANE MOVEMENT OF SUBSTANCES_MOL	18	0.345284	1.12534	0.275281	0.703901	1	1	tags=6%, list=0%, signal=5%
MITOCHONDRIAL INNER MEMBRANE_CEL	26	0.30885	1.11511	0.303681	0.729957	1	30	tags=12%, list=3%, signal=12%
CDC10_BIND	15	0.352099	1.11466	0.301299	0.728151	1	693	tags=100%, list=65%, signal=283%
RPN6_BIND	21	0.322831	1.11374	0.303797	0.727897	1	221	tags=43%, list=21%, signal=53%
PTA1_DAMP_SGA	15	0.337405	1.11179	0.314815	0.730527	1	122	tags=27%, list=11%, signal=30%
AMINE METABOLIC PROCESS_BIO	67	0.24233	1.11114	0.268482	0.729269	1	331	tags=42%, list=31%, signal=57%
ERV14_BIND	26	0.302944	1.10942	0.28655	0.73107	1	225	tags=46%, list=21%, signal=57%
RPL14A_BIND	25	0.303771	1.10885	0.270115	0.729764	1	128	tags=16%, list=12%, signal=18%
CA21CHR2X6	24	0.310059	1.1086	0.319277	0.727526	1	44	tags=17%, list=4%, signal=17%
ALT1_SGA	27	0.287664	1.10536	0.288184	0.733993	1	92	tags=15%, list=9%, signal=16%
INP53_BIND	16	0.349552	1.10316	0.293785	0.737325	1	198	tags=31%, list=19%, signal=38%
GAL4_DN	41	0.267533	1.10013	0.318612	0.742943	1	102	tags=15%, list=10%, signal=16%
RIM101_NRG1_DN	26	0.296374	1.09922	0.313953	0.742809	1	188	tags=31%, list=18%, signal=36%
LYASE ACTIVITY_MOL	26	0.295917	1.09914	0.327103	0.740078	1	328	tags=50%, list=31%, signal=71%
CA21CHR6X4	23	0.303989	1.09773	0.308333	0.741116	1	52	tags=22%, list=5%, signal=22%
APQ12_BIND	43	0.262561	1.09747	0.321311	0.739028	1	277	tags=37%, list=26%, signal=48%
SBP1_BIND	15	0.355553	1.09587	0.34626	0.740604	1	3	tags=7%, list=0%, signal=7%
POL12-TS_SGA	16	0.339064	1.09348	0.347107	0.744419	1	707	tags=100%, list=67%, signal=294%
PROTEIN MODIFICATION PROCESS_BIO	42	0.255633	1.08933	0.333333	0.7534	1	247	tags=36%, list=23%, signal=45%
AMINO ACID AND DERIVATIVE METABOLIC PROCESS_BIO	66	0.236812	1.08712	0.297945	0.756959	1	331	tags=41%, list=31%, signal=56%
AIM44_SGA	44	0.259889	1.08563	0.30897	0.758437	1	290	tags=41%, list=27%, signal=54%
RTG2_BIND	20	0.32558	1.08511	0.35989	0.757085	1	324	tags=65%, list=30%, signal=92%
NITROGEN COMPOUND METABOLIC PROCESS_BIO	71	0.233158	1.0833	0.304511	0.75924	1	333	tags=42%, list=31%, signal=57%
RGP1_BIND	29	0.287529	1.07679	0.35061	0.775137	1	138	tags=24%, list=13%, signal=27%
PROTEIN BINDING_MOL	38	0.266723	1.07473	0.371951	0.778529	1	246	tags=37%, list=23%, signal=46%
HST3_SGA	18	0.328512	1.07461	0.363112	0.775979	1	334	tags=61%, list=31%, signal=88%
USO1-1_SGA	18	0.321318	1.07108	0.361478	0.783025	1	199	tags=33%, list=19%, signal=40%
CELLULAR LIPID METABOLIC PROCESS_BIO	32	0.269303	1.07033	0.336508	0.782428	1	180	tags=31%, list=17%, signal=36%
HSP82_BIND	18	0.321112	1.06692	0.360947	0.78927	1	360	tags=56%, list=34%, signal=83%
SEC28_SGA	39	0.266002	1.0648	0.345912	0.792919	1	225	tags=31%, list=21%, signal=38%
ATPASE ACTIVITY_MOL	45	0.249233	1.06417	0.359873	0.791861	1	255	tags=31%, list=24%, signal=39%
VPS24_BIND	23	0.30353	1.06404	0.337047	0.78936	1	272	tags=43%, list=26%, signal=57%
DEVELOPMENTAL PROCESS_BIO	27	0.284424	1.06136	0.361022	0.794336	1	148	tags=30%, list=14%, signal=34%
MITOCHONDRIAL ENVELOPE_CEL	33	0.269822	1.05995	0.386076	0.795686	1	30	tags=9%, list=3%, signal=9%
VAC14_BIND	20	0.312825	1.05815	0.357988	0.79819	1	198	tags=35%, list=19%, signal=42%
UBI4_SGA	31	0.274471	1.05792	0.388199	0.796035	1	138	tags=23%, list=13%, signal=25%
LIPID METABOLIC PROCESS_BIO	34	0.26585	1.05769	0.353135	0.793912	1	233	tags=38%, list=22%, signal=47%
KRE1_SGA	15	0.326357	1.05326	0.383033	0.803873	1	27	tags=13%, list=3%, signal=13%
ADI1_SGA	16	0.327474	1.05268	0.415954	0.802654	1	314	tags=63%, list=30%, signal=87%
BCY1_SGA	31	0.270238	1.05014	0.384848	0.807192	1	139	tags=23%, list=13%, signal=25%
EUKARYOTIC 43S PREINITIATION COMPLEX_CEL	18	0.31502	1.04887	0.364641	0.807927	1	581	tags=94%, list=55%, signal=205%
DGK1_BIND	23	0.295319	1.04873	0.414986	0.805519	1	163	tags=35%, list=15%, signal=40%
MBP1P_TFMOTIF	31	0.270231	1.0477	0.389728	0.805508	1	235	tags=32%, list=22%, signal=40%
SWA2_BIND	18	0.312285	1.0462	0.383598	0.806816	1	138	tags=22%, list=13%, signal=25%
COX6_SGA	19	0.308998	1.04606	0.393782	0.804421	1	128	tags=21%, list=12%, signal=24%
TBF1P_TFMOTIF	68	0.225812	1.0456	0.370229	0.80291	1	240	tags=29%, list=23%, signal=36%
VAM3_BIND	15	0.344184	1.04411	0.403226	0.804604	1	3	tags=7%, list=0%, signal=7%
INTRACELLULAR TRANSPORT_BIO	73	0.22281	1.04132	0.413386	0.810167	1	243	tags=34%, list=23%, signal=41%
NRG1_SGA	20	0.30496	1.04063	0.393162	0.809428	1	27	tags=15%, list=3%, signal=15%
DCC1_SGA	23	0.292602	1.04048	0.414566	0.807072	1	127	tags=17%, list=12%, signal=19%
DCR2_SGA	18	0.302542	1.03832	0.389785	0.810672	1	190	tags=33%, list=18%, signal=40%
SNF6-CHIP-37C	116	0.201534	1.03309	0.391892	0.82321	1	200	tags=24%, list=19%, signal=26%
ANP1_SGA	102	0.204095	1.0324	0.414729	0.822282	1	220	tags=31%, list=21%, signal=36%
BEM1_BIND	39	0.249788	1.02466	0.406154	0.842283	1	163	tags=23%, list=15%, signal=26%
CYT1_BIND	20	0.300812	1.02047	0.454802	0.852047	1	221	tags=30%, list=21%, signal=37%
COG8_SGA	22	0.287767	1.01994	0.441011	0.85078	1	138	tags=23%, list=13%, signal=26%
CELLULAR LOCALIZATION_BIO	79	0.214199	1.01718	0.428571	0.855792	1	243	tags=34%, list=23%, signal=41%
ESTABLISHMENT OF CELLULAR LOCALIZATION_BIO	74	0.211249	1.01681	0.421456	0.854075	1	243	tags=34%, list=23%, signal=41%
SEC27-1_SGA	15	0.316782	1.01641	0.40625	0.852382	1	138	tags=20%, list=13%, signal=23%
HSP60_BIND	17	0.312163	1.0156	0.408488	0.851896	1	344	tags=53%, list=32%, signal=77%
NUCLEOTIDE METABOLIC PROCESS_BIO	23	0.284557	1.01048	0.446991	0.863957	1	29	tags=9%, list=3%, signal=9%
PYROPHOSPHATASE ACTIVITY_MOL	61	0.221397	1.00514	0.461538	0.876874	1	267	tags=33%, list=25%, signal=41%
ARP9-1_SGA	17	0.304473	1.00428	0.469101	0.876443	1	252	tags=41%, list=24%, signal=53%
VPS27_BIND	24	0.284139	1.00272	0.448571	0.878353	1	324	tags=50%, list=30%, signal=70%
PET8_SGA	24	0.277809	0.99966	0.443787	0.884683	1	122	tags=21%, list=11%, signal=23%
NHP10_BIND	29	0.265273	0.998865	0.440367	0.884073	1	285	tags=38%, list=27%, signal=50%
HYDROLASE ACTIVITY, ACTING ON ACID ANHYDRIDES_MOL	61	0.221397	0.997064	0.480392	0.886324	1	267	tags=33%, list=25%, signal=41%
IES1_BIND	20	0.292534	0.993859	0.461111	0.893085	1	370	tags=55%, list=35%, signal=83%
SPF1_BIND	28	0.261365	0.993132	0.464832	0.892237	1	163	tags=25%, list=15%, signal=29%
HYDROLASE ACTIVITY, ACTING ON ACID ANHYDRIDES, IN PHOSPHORUS-CONTAINING ANHYDRIDES_MOL	61	0.221397	0.993007	0.482143	0.889774	1	267	tags=33%, list=25%, signal=41%
LEU3P_TFMOTIF	18	0.301603	0.991777	0.456989	0.89042	1	233	tags=39%, list=22%, signal=49%
COFACTOR BIOSYNTHETIC PROCESS_BIO	17	0.304835	0.988293	0.472296	0.897852	1	1	tags=6%, list=0%, signal=6%
LIGASE ACTIVITY, FORMING CARBON-NITROGEN BONDS_MOL	15	0.310738	0.986953	0.487871	0.898982	1	292	tags=53%, list=27%, signal=72%
HMO1_BIND	26	0.268849	0.98582	0.489231	0.899594	1	277	tags=35%, list=26%, signal=46%
GET2_BIND	43	0.238392	0.984502	0.472131	0.900826	1	294	tags=40%, list=28%, signal=52%
SWF1_BIND	18	0.283779	0.983761	0.473239	0.900016	1	3	tags=6%, list=0%, signal=5%
SAM1_BIND	25	0.266223	0.981449	0.485207	0.90373	1	360	tags=48%, list=34%, signal=71%
RVB2_BIND	17	0.301463	0.980903	0.490814	0.902504	1	344	tags=53%, list=32%, signal=77%
ROT2_BIND	17	0.30343	0.975483	0.477901	0.915659	1	303	tags=65%, list=29%, signal=89%
ORM2_BIND	18	0.296201	0.9702	0.49589	0.928419	1	57	tags=11%, list=5%, signal=12%
HYPHAE FBS37 (NANTEL)_DN	23	0.268269	0.967248	0.522659	0.934361	1	160	tags=30%, list=15%, signal=35%
BRG1_TF	56	0.213414	0.966331	0.543071	0.934073	1	176	tags=25%, list=17%, signal=28%
HSP60_DAMP_SGA	19	0.284849	0.966112	0.487871	0.931844	1	119	tags=21%, list=11%, signal=23%
PCP1_BIND	17	0.304522	0.966101	0.487324	0.929	1	163	tags=29%, list=15%, signal=34%
PKR1_BIND	23	0.270875	0.963061	0.501393	0.935271	1	283	tags=48%, list=27%, signal=64%
PTC1_BIND	39	0.232671	0.961949	0.547401	0.935522	1	3	tags=5%, list=0%, signal=5%
CDH1_SGA	35	0.250444	0.961245	0.526144	0.934753	1	199	tags=31%, list=19%, signal=37%
HMO1_SGA	26	0.2591	0.961148	0.523944	0.932164	1	246	tags=27%, list=23%, signal=34%
GYP1_SGA	31	0.252983	0.960438	0.491071	0.931401	1	138	tags=23%, list=13%, signal=25%
RPT2_DAMP_SGA	29	0.259782	0.958695	0.536585	0.933692	1	54	tags=10%, list=5%, signal=11%
SLY1-TS_SGA	19	0.281549	0.957893	0.514212	0.933156	1	138	tags=21%, list=13%, signal=24%
GYP1_BIND	29	0.252599	0.955859	0.548896	0.936052	1	222	tags=28%, list=21%, signal=34%
T1 BUTYRIC-VS-CONTROL_DN	59	0.214153	0.955667	0.547893	0.933832	1	201	tags=29%, list=19%, signal=34%
GAS1_BIND	32	0.244699	0.955395	0.5	0.931787	1	225	tags=34%, list=21%, signal=42%
CDC10-4_SGA	35	0.245283	0.952304	0.540453	0.937788	1	272	tags=43%, list=26%, signal=56%
YJR054W_BIND	22	0.275378	0.952288	0.513196	0.935041	1	163	tags=18%, list=15%, signal=21%
SEC66_BIND	34	0.237017	0.949	0.541787	0.941524	1	225	tags=41%, list=21%, signal=51%
CPR7_BIND	16	0.295818	0.948114	0.523936	0.941317	1	3	tags=6%, list=0%, signal=6%
LHS1_BIND	21	0.26854	0.947214	0.515581	0.941084	1	225	tags=38%, list=21%, signal=47%
CWT1_EXPPHASE_UP	18	0.289029	0.943531	0.540059	0.948769	1	28	tags=11%, list=3%, signal=11%
RPP1A_BIND	18	0.291623	0.939895	0.530184	0.95635	1	89	tags=11%, list=8%, signal=12%
SHP1_BIND	19	0.280811	0.938886	0.549724	0.956467	1	165	tags=32%, list=16%, signal=37%
VID24_SGA	20	0.275206	0.935724	0.556497	0.962648	1	50	tags=10%, list=5%, signal=10%
PPT2_SGA	34	0.234579	0.934746	0.582353	0.962758	1	127	tags=15%, list=12%, signal=16%
CA21CHR4X8	19	0.278973	0.934438	0.536111	0.960864	1	21	tags=11%, list=2%, signal=11%
OPI1_BIND	16	0.289142	0.933349	0.516304	0.96123	1	229	tags=31%, list=22%, signal=39%
SRY1_SGA	15	0.295477	0.932724	0.532995	0.960177	1	153	tags=27%, list=14%, signal=31%
RPS24B_BIND	22	0.264169	0.929802	0.572973	0.965484	1	787	tags=100%, list=74%, signal=377%
CTI6_BIND	19	0.273002	0.924783	0.543909	0.976032	1	370	tags=53%, list=35%, signal=79%
BMH2_BIND	17	0.294081	0.9233	0.586402	0.977324	1	209	tags=35%, list=20%, signal=43%
REPRODUCTION OF A SINGLE-CELLED ORGANISM_BIO	17	0.287522	0.918478	0.558074	0.987999	1	224	tags=41%, list=21%, signal=51%
CDC2-2_SGA	19	0.27736	0.917339	0.550848	0.988479	1	3	tags=5%, list=0%, signal=5%
HIR2_SGA	20	0.276168	0.916019	0.6	0.989183	1	222	tags=35%, list=21%, signal=43%
SUM1_BIND	29	0.241083	0.915466	0.57265	0.98793	1	163	tags=21%, list=15%, signal=24%
BLM10_BIND	15	0.290833	0.914349	0.559682	0.988212	1	6	tags=7%, list=1%, signal=7%
SUR1_BIND	29	0.239883	0.914338	0.572755	0.985457	1	66	tags=10%, list=6%, signal=11%
COG8_BIND	23	0.260145	0.913384	0.588235	0.985356	1	138	tags=26%, list=13%, signal=29%
PAC1_SGA	16	0.283031	0.913307	0.590028	0.982798	1	267	tags=38%, list=25%, signal=49%
TLG2_SGA	29	0.239478	0.91122	0.586207	0.985665	1	276	tags=34%, list=26%, signal=45%
CBC2_BIND	23	0.26123	0.905928	0.597765	0.997414	1	335	tags=48%, list=32%, signal=68%
CDC5_4H_DN	40	0.215054	0.905035	0.624585	0.996918	1	842	tags=100%, list=79%, signal=463%
VPS8_SGA	36	0.221414	0.904024	0.590769	0.996691	1	13	tags=6%, list=1%, signal=5%
CA21CHR2X3	25	0.246474	0.902559	0.602857	0.997906	1	122	tags=20%, list=11%, signal=22%
SIC1_BIND	36	0.223079	0.902431	0.622356	0.995539	1	229	tags=28%, list=22%, signal=34%
MNN11_BIND	26	0.243831	0.901006	0.607903	0.996693	1	21	tags=8%, list=2%, signal=8%
RPL22A_SGA	21	0.26552	0.899876	0.584795	0.996941	1	86	tags=19%, list=8%, signal=20%
GET3_SGA	19	0.258421	0.899857	0.610497	0.994279	1	3	tags=5%, list=0%, signal=5%
CA21CHR5X3	25	0.247335	0.899745	0.607955	0.991867	1	121	tags=24%, list=11%, signal=26%
REPRODUCTION_BIO	19	0.270628	0.895914	0.575676	0.999339	1	133	tags=26%, list=13%, signal=30%
CLA4_SGA	25	0.236097	0.892158	0.607955	1	1	221	tags=32%, list=21%, signal=39%
CYK3_BIND	17	0.273196	0.890768	0.6	1	1	324	tags=59%, list=30%, signal=83%
ATG8_SGA	15	0.279006	0.889159	0.598361	1	1	139	tags=27%, list=13%, signal=30%
VAM6_SGA	19	0.263219	0.888498	0.595628	1	1	3	tags=5%, list=0%, signal=5%
VIP1_BIND	19	0.261085	0.88806	0.605744	1	1	3	tags=5%, list=0%, signal=5%
HHF1_BIND	42	0.20828	0.887551	0.631068	1	1	358	tags=45%, list=34%, signal=66%
MACROMOLECULE LOCALIZATION_BIO	56	0.199406	0.887302	0.663333	1	1	256	tags=36%, list=24%, signal=45%
MDM35_BIND	19	0.260755	0.887112	0.614706	1	1	1	tags=5%, list=0%, signal=5%
RIM101_BIND	19	0.263654	0.886915	0.629213	0.998722	1	336	tags=58%, list=32%, signal=83%
CDC24-4_SGA	21	0.256188	0.886779	0.637363	0.996464	1	351	tags=52%, list=33%, signal=77%
ISW1_BIND	18	0.260412	0.885371	0.579515	0.997442	1	252	tags=39%, list=24%, signal=50%
UTP21_BIND	18	0.265072	0.88475	0.598338	0.996545	1	785	tags=100%, list=74%, signal=376%
HYPHAL GROWTH_BIO	28	0.238917	0.88367	0.640379	0.99673	1	225	tags=36%, list=21%, signal=44%
SYS1_SGA	23	0.244199	0.881938	0.614035	0.998468	1	45	tags=9%, list=4%, signal=9%
BRE2_SGA	17	0.281192	0.881386	0.62973	0.997304	1	267	tags=47%, list=25%, signal=62%
ARL1_SGA	17	0.269752	0.880704	0.619444	0.996314	1	3	tags=6%, list=0%, signal=6%
ENT5_SGA	16	0.274896	0.879327	0.621253	0.997257	1	139	tags=19%, list=13%, signal=21%
SEC18-1_SGA	15	0.282022	0.872796	0.616967	1	1	138	tags=27%, list=13%, signal=30%
BMH1_BIND	27	0.230173	0.871356	0.663743	1	1	272	tags=41%, list=26%, signal=53%
UTH1_SGA	19	0.256141	0.869872	0.653951	1	1	194	tags=32%, list=18%, signal=38%
YCS4-1_SGA	28	0.23246	0.869677	0.652819	1	1	272	tags=29%, list=26%, signal=37%
CA21CHR1X5	30	0.226599	0.867269	0.666667	1	1	112	tags=20%, list=11%, signal=22%
ORGANELLE ENVELOPE_CEL	48	0.202812	0.866941	0.704698	1	1	30	tags=6%, list=3%, signal=6%
ENVELOPE_CEL	48	0.202812	0.862726	0.724458	1	1	30	tags=6%, list=3%, signal=6%
RPB2_BIND	20	0.243862	0.862556	0.661111	1	1	252	tags=25%, list=24%, signal=32%
PTP1_SGA	18	0.256374	0.861493	0.673973	1	1	290	tags=50%, list=27%, signal=68%
PRE9_BIND	49	0.202052	0.860884	0.727869	1	1	221	tags=31%, list=21%, signal=37%
SMI1_BIND	22	0.242376	0.86066	0.657817	1	1	221	tags=41%, list=21%, signal=51%
CYTOSOL_CEL	66	0.18345	0.855343	0.734767	1	1	222	tags=23%, list=21%, signal=27%
BUD27_BIND	19	0.256887	0.8551	0.657609	1	1	202	tags=32%, list=19%, signal=38%
TMS1_SGA	21	0.246365	0.852339	0.656338	1	1	3	tags=5%, list=0%, signal=5%
MSK1_BIND	18	0.260519	0.851383	0.646575	1	1	272	tags=33%, list=26%, signal=44%
ERS1_SGA	18	0.257302	0.851205	0.648438	1	1	119	tags=28%, list=11%, signal=31%
ARL3_BIND	15	0.272049	0.848949	0.675141	1	1	208	tags=33%, list=20%, signal=41%
NUCLEOSIDE-TRIPHOSPHATASE ACTIVITY_MOL	57	0.191428	0.848457	0.764706	1	1	267	tags=30%, list=25%, signal=38%
GSG1_SGA	44	0.20052	0.848263	0.766355	1	1	294	tags=36%, list=28%, signal=48%
SUV3_SGA	20	0.244581	0.84698	0.662198	1	1	103	tags=20%, list=10%, signal=22%
ANATOMICAL STRUCTURE DEVELOPMENT_BIO	25	0.22698	0.845934	0.684058	1	1	314	tags=48%, list=30%, signal=67%
ANATOMICAL STRUCTURE MORPHOGENESIS_BIO	25	0.22698	0.845705	0.680352	1	1	314	tags=48%, list=30%, signal=67%
MID2_BIND	16	0.26719	0.844148	0.67867	1	1	250	tags=44%, list=24%, signal=56%
ORC3-70_SGA	20	0.251056	0.841849	0.65252	1	1	3	tags=5%, list=0%, signal=5%
KRI1_BIND	16	0.262655	0.840935	0.690217	1	1	787	tags=100%, list=74%, signal=379%
RPA14_SGA	19	0.238239	0.837438	0.683196	1	1	107	tags=16%, list=10%, signal=17%
UTP30_BIND	16	0.262655	0.835418	0.69589	1	1	787	tags=100%, list=74%, signal=379%
AAH1_BIND	18	0.251897	0.835309	0.674731	1	1	257	tags=39%, list=24%, signal=50%
MITOCHONDRIAL MEMBRANE PART_CEL	16	0.265957	0.832372	0.709945	1	1	1	tags=6%, list=0%, signal=6%
NRD1_DAMP_SGA	28	0.22093	0.831798	0.691395	1	1	181	tags=29%, list=17%, signal=34%
CELL MORPHOGENESIS_BIO	25	0.22698	0.830541	0.698701	1	1	314	tags=48%, list=30%, signal=67%
NEW1_SGA	39	0.201651	0.829022	0.776163	1	1	132	tags=18%, list=12%, signal=20%
HYPOXIA_SYNNOTT_DN	65	0.181013	0.828665	0.793358	1	1	91	tags=11%, list=9%, signal=11%
SWC5_BIND	42	0.197482	0.827705	0.798046	1	1	276	tags=40%, list=26%, signal=53%
RXT2_BIND	33	0.216357	0.827693	0.73871	1	1	105	tags=12%, list=10%, signal=13%
BIOPOLYMER MODIFICATION_BIO	54	0.187935	0.82755	0.795302	1	1	247	tags=30%, list=23%, signal=37%
SET3_BIND	19	0.247784	0.827156	0.714988	1	1	252	tags=42%, list=24%, signal=54%
RPS5_BIND	32	0.214355	0.826685	0.758929	1	1	841	tags=100%, list=79%, signal=464%
UTP7_BIND	16	0.262655	0.825941	0.69863	1	1	787	tags=100%, list=74%, signal=379%
ACT1-120_SGA	18	0.253268	0.82368	0.706941	1	1	54	tags=11%, list=5%, signal=12%
SHE4_SGA	41	0.19564	0.821523	0.758929	1	1	28	tags=7%, list=3%, signal=7%
CELLULAR STRUCTURE MORPHOGENESIS_BIO	25	0.22698	0.821167	0.743363	1	1	314	tags=48%, list=30%, signal=67%
PROTEIN LOCALIZATION_BIO	47	0.195114	0.820966	0.746795	1	1	224	tags=32%, list=21%, signal=39%
LST4_SGA	27	0.217953	0.817655	0.751534	1	1	132	tags=15%, list=12%, signal=16%
CA21CHR6X2	22	0.226217	0.815567	0.761765	1	1	67	tags=18%, list=6%, signal=19%
ATPASE ACTIVITY, COUPLED_MOL	32	0.209732	0.815444	0.751515	1	1	1	tags=3%, list=0%, signal=3%
VPS17_SGA	15	0.257083	0.815246	0.718499	1	1	139	tags=20%, list=13%, signal=23%
ORGANELLE MEMBRANE_CEL	71	0.174254	0.814264	0.851064	1	1	116	tags=14%, list=11%, signal=15%
COX23_SGA	27	0.22169	0.8115	0.760989	1	1	225	tags=37%, list=21%, signal=46%
BUD21_BIND	28	0.214202	0.809464	0.731707	1	1	3	tags=4%, list=0%, signal=3%
CHK1_BIND	16	0.261148	0.807346	0.77095	1	1	89	tags=19%, list=8%, signal=20%
GROWTH_BIO	51	0.183476	0.806924	0.833898	1	1	242	tags=31%, list=23%, signal=39%
MITOTIC CELL CYCLE_BIO	15	0.260164	0.806088	0.757493	1	1	246	tags=53%, list=23%, signal=68%
CELL CYCLE PHASE_BIO	21	0.229714	0.805668	0.734463	1	1	246	tags=43%, list=23%, signal=55%
RESPONSE TO DRUG_BIO	20	0.233987	0.805636	0.739247	1	1	225	tags=35%, list=21%, signal=44%
GLO3_BIND	19	0.23769	0.804291	0.69774	1	1	229	tags=37%, list=22%, signal=46%
VPS35_SGA	15	0.256651	0.802707	0.708447	1	1	3	tags=7%, list=0%, signal=7%
UBX2_BIND	17	0.254705	0.801506	0.737705	1	1	276	tags=59%, list=26%, signal=78%
RPG1_BIND	15	0.25768	0.800333	0.75063	1	1	90	tags=13%, list=8%, signal=14%
FPS1_SGA	41	0.198196	0.798715	0.790323	1	1	128	tags=20%, list=12%, signal=21%
RIM13_SGA	25	0.219836	0.79867	0.763006	1	1	222	tags=36%, list=21%, signal=44%
ARO1_BIND	33	0.204607	0.796143	0.817629	1	1	130	tags=15%, list=12%, signal=17%
ESTABLISHMENT OF CELL POLARITY (SENSU FUNGI)_BIO	17	0.241309	0.794836	0.738162	1	1	314	tags=53%, list=30%, signal=74%
CDC28-13_SGA	15	0.258588	0.793076	0.745856	1	1	791	tags=100%, list=74%, signal=385%
ESTABLISHMENT OF CELL POLARITY_BIO	17	0.241309	0.792839	0.766382	1	1	314	tags=53%, list=30%, signal=74%
OPI3_SGA	44	0.181366	0.788852	0.839286	1	1	102	tags=14%, list=10%, signal=14%
CCZ1_BIND	18	0.237589	0.787913	0.766484	1	1	283	tags=39%, list=27%, signal=52%
HMI1_SGA	30	0.205427	0.787666	0.797059	1	1	3	tags=3%, list=0%, signal=3%
RPL6A_BIND	24	0.212705	0.78617	0.794203	1	1	841	tags=100%, list=79%, signal=468%
SLT2_BIND	32	0.201609	0.785092	0.806854	1	1	194	tags=25%, list=18%, signal=30%
NOB1_DAMP_SGA	25	0.218602	0.78398	0.767857	1	1	138	tags=20%, list=13%, signal=22%
CEM1_BIND	17	0.238692	0.782419	0.797059	1	1	101	tags=18%, list=10%, signal=19%
CCZ1_SGA	23	0.218633	0.781924	0.79726	1	1	130	tags=22%, list=12%, signal=24%
ESTABLISHMENT AND/OR MAINTENANCE OF CELL POLARITY (SENSU FUNGI)_BIO	17	0.241309	0.781134	0.765172	1	1	314	tags=53%, list=30%, signal=74%
ESTABLISHMENT AND/OR MAINTENANCE OF CELL POLARITY_BIO	17	0.241309	0.777095	0.735695	1	1	314	tags=53%, list=30%, signal=74%
RGP1_SGA	23	0.220408	0.774002	0.776163	1	1	3	tags=4%, list=0%, signal=4%
CYTOSOLIC PART_CEL	32	0.197866	0.770668	0.827089	1	1	858	tags=100%, list=81%, signal=503%
TPS2_SGA	24	0.217597	0.770096	0.830508	1	1	221	tags=38%, list=21%, signal=46%
CHS5_SGA	24	0.211636	0.769427	0.797688	1	1	219	tags=33%, list=21%, signal=41%
NUM1_SGA	18	0.231515	0.76893	0.810198	1	1	267	tags=44%, list=25%, signal=58%
THP2_SGA	19	0.231458	0.76746	0.784916	1	1	3	tags=5%, list=0%, signal=5%
LRS4_SGA	50	0.179575	0.765534	0.872274	1	1	267	tags=30%, list=25%, signal=38%
AMINE BIOSYNTHETIC PROCESS_BIO	32	0.195592	0.76523	0.808383	1	1	284	tags=34%, list=27%, signal=45%
GUP1_BIND	21	0.223853	0.764669	0.799401	1	1	277	tags=43%, list=26%, signal=57%
NIP100_BIND	15	0.243428	0.764354	0.819843	1	1	230	tags=33%, list=22%, signal=42%
ORM2_SGA	49	0.176137	0.763644	0.867797	1	1	272	tags=33%, list=26%, signal=42%
CAD1P_TFMOTIF	103	0.151426	0.763366	0.928571	1	1	296	tags=32%, list=28%, signal=40%
HAP5_SGA	23	0.211819	0.763352	0.794562	1	1	177	tags=22%, list=17%, signal=26%
AMINO ACID BIOSYNTHETIC PROCESS_BIO	32	0.195592	0.76077	0.824841	1	1	284	tags=34%, list=27%, signal=45%
DBF2_BIND	20	0.219554	0.758904	0.805158	1	1	300	tags=40%, list=28%, signal=55%
RPL16B_BIND	24	0.212705	0.756222	0.81155	1	1	841	tags=100%, list=79%, signal=468%
RPS4B_BIND	25	0.212909	0.755978	0.778712	1	1	841	tags=100%, list=79%, signal=468%
BRE1_SGA	40	0.18692	0.755796	0.874608	1	1	294	tags=45%, list=28%, signal=60%
RUD3_SGA	30	0.200972	0.755387	0.801887	1	1	139	tags=20%, list=13%, signal=22%
NITROGEN COMPOUND BIOSYNTHETIC PROCESS_BIO	32	0.195592	0.755064	0.843558	1	1	284	tags=34%, list=27%, signal=45%
RIM13_BIND	21	0.218283	0.754536	0.820972	1	1	222	tags=29%, list=21%, signal=35%
TOR2_DAMP_SGA	18	0.230946	0.753336	0.796657	1	1	292	tags=44%, list=27%, signal=60%
CDC2-7_SGA	29	0.198462	0.752424	0.880117	1	1	3	tags=3%, list=0%, signal=3%
PPZ1_BIND	20	0.224495	0.750239	0.82967	1	1	171	tags=30%, list=16%, signal=35%
SNT1_SGA	46	0.174399	0.749013	0.872727	1	1	150	tags=15%, list=14%, signal=17%
RPL43A_BIND	16	0.230267	0.748779	0.791328	1	1	300	tags=38%, list=28%, signal=51%
LTE1_BIND	21	0.215036	0.747585	0.837758	1	1	223	tags=38%, list=21%, signal=47%
TFP1_SGA	56	0.169158	0.746082	0.899306	1	1	79	tags=9%, list=7%, signal=9%
SPT15_BIND	16	0.230002	0.745784	0.821622	1	1	346	tags=63%, list=33%, signal=91%
LCB1-5_SGA	24	0.210583	0.744312	0.798271	1	1	179	tags=25%, list=17%, signal=29%
ACT1-125_SGA	31	0.190963	0.742926	0.875796	1	1	86	tags=13%, list=8%, signal=14%
NUG1-2_SGA	22	0.203485	0.741963	0.813411	1	1	746	tags=95%, list=70%, signal=313%
CA21CHR2X8	33	0.187548	0.740829	0.857143	1	1	267	tags=30%, list=25%, signal=39%
CYTOSOLIC RIBOSOME (SENSU EUKARYOTA)_CEL	31	0.197674	0.740817	0.869697	1	1	858	tags=100%, list=81%, signal=503%
RTG3_SGA	23	0.207776	0.738704	0.825485	1	1	602	tags=87%, list=57%, signal=196%
SWC3_BIND	40	0.174803	0.738471	0.879479	1	1	252	tags=33%, list=24%, signal=41%
RPS6A_SGA	15	0.24327	0.737797	0.788265	1	1	60	tags=13%, list=6%, signal=14%
CA21CHR7X4	23	0.208679	0.732549	0.84573	1	1	101	tags=13%, list=10%, signal=14%
NEW1_BIND	22	0.205403	0.729644	0.845912	1	1	279	tags=32%, list=26%, signal=42%
CKA1_BIND	25	0.197533	0.729404	0.852368	1	1	370	tags=60%, list=35%, signal=90%
PTR3_DAMP_SGA	21	0.21376	0.726954	0.863095	1	1	287	tags=43%, list=27%, signal=58%
PAF1_BIND	24	0.204042	0.724827	0.858333	1	1	850	tags=100%, list=80%, signal=488%
UBR2_BIND	24	0.205223	0.724289	0.868571	1	1	171	tags=29%, list=16%, signal=34%
KAR3_BIND	20	0.212268	0.722145	0.870057	1	1	221	tags=35%, list=21%, signal=43%
CHS5_BIND	23	0.206343	0.721332	0.846994	1	1	328	tags=43%, list=31%, signal=62%
SCC2-4_SGA	27	0.193701	0.717494	0.859008	1	1	297	tags=37%, list=28%, signal=50%
FILAMENTOUS GROWTH_BIO	50	0.167182	0.71613	0.937294	1	1	242	tags=30%, list=23%, signal=37%
PSEUDOMONAS_UP	32	0.183746	0.714618	0.886076	1	1	148	tags=16%, list=14%, signal=18%
ATX1_SGA	20	0.206907	0.71395	0.861582	1	1	132	tags=20%, list=12%, signal=22%
BRE1_BIND	36	0.177902	0.712305	0.897764	1	1	107	tags=17%, list=10%, signal=18%
VPS9_BIND	29	0.191563	0.711363	0.897196	1	1	336	tags=52%, list=32%, signal=74%
RTF1_BIND	31	0.182486	0.707399	0.909657	1	1	346	tags=52%, list=33%, signal=74%
CA21CHRRX10	26	0.185594	0.70727	0.915942	1	1	167	tags=23%, list=16%, signal=27%
OST3_BIND	21	0.203851	0.704992	0.877143	1	1	283	tags=43%, list=27%, signal=57%
ARC18_SGA	20	0.20326	0.701751	0.889518	1	1	850	tags=100%, list=80%, signal=490%
CA21CHR2X11	15	0.229623	0.699768	0.860119	1	1	269	tags=40%, list=25%, signal=53%
RCO1_BIND	17	0.212257	0.698075	0.845144	1	1	252	tags=41%, list=24%, signal=53%
VAC14_SGA	30	0.178078	0.698022	0.897281	1	1	139	tags=13%, list=13%, signal=15%
RHE30_DN	90	0.142048	0.696711	0.981308	1	1	172	tags=13%, list=16%, signal=15%
NRG1_TF	61	0.150475	0.695276	0.948805	1	1	283	tags=28%, list=27%, signal=36%
CA21CHR6X3	19	0.199934	0.694263	0.898592	1	1	261	tags=37%, list=25%, signal=48%
STT3-7_SGA	17	0.211297	0.689432	0.864789	1	1	107	tags=18%, list=10%, signal=19%
YPT6_BIND	49	0.157024	0.68545	0.93985	1	1	273	tags=33%, list=26%, signal=42%
RPL28_BIND	16	0.211079	0.68501	0.870886	1	1	841	tags=100%, list=79%, signal=472%
IRA2_BIND	39	0.172321	0.68465	0.924242	1	1	239	tags=28%, list=22%, signal=35%
CAP2_UP	103	0.135724	0.684562	0.981818	1	1	157	tags=14%, list=15%, signal=14%
AME1-4_SGA	26	0.188615	0.681718	0.943218	1	1	290	tags=38%, list=27%, signal=52%
CDC12-1_SGA	19	0.20461	0.68111	0.89267	1	1	230	tags=32%, list=22%, signal=40%
TEF4_BIND	24	0.186441	0.679425	0.922156	1	1	128	tags=17%, list=12%, signal=19%
AROMATIC COMPOUND METABOLIC PROCESS_BIO	16	0.213421	0.678789	0.849462	1	1	92	tags=19%, list=9%, signal=20%
CA21CHR3X6	15	0.215664	0.678202	0.854497	1	1	249	tags=33%, list=23%, signal=43%
SIN3_BIND	46	0.159313	0.676024	0.936242	1	1	257	tags=30%, list=24%, signal=38%
YAR1_SGA	18	0.204407	0.675117	0.877907	1	1	333	tags=44%, list=31%, signal=64%
DYN3_SGA	24	0.187474	0.671866	0.907463	1	1	267	tags=33%, list=25%, signal=44%
HOM3_SGA	20	0.194288	0.66964	0.899456	1	1	370	tags=65%, list=35%, signal=98%
IWR1_SGA	29	0.167858	0.659072	0.938111	1	1	3	tags=3%, list=0%, signal=3%
DFG16_BIND	20	0.193223	0.658532	0.931319	1	1	336	tags=50%, list=32%, signal=72%
ERI1_SGA	16	0.205349	0.657736	0.908854	1	1	847	tags=100%, list=80%, signal=485%
SEM1_BIND	41	0.159382	0.656936	0.947712	1	1	277	tags=39%, list=26%, signal=51%
TYE7_TF	63	0.142716	0.653836	0.973881	1	1	241	tags=27%, list=23%, signal=33%
NPR3_BIND	16	0.207509	0.652839	0.902062	1	1	324	tags=44%, list=30%, signal=62%
SEM1_SGA	20	0.188464	0.649745	0.932773	1	1	297	tags=40%, list=28%, signal=54%
ENO2_SGA	34	0.164639	0.649054	0.957317	1	1	153	tags=21%, list=14%, signal=23%
LEO1_BIND	29	0.170996	0.647567	0.933862	1	1	3	tags=3%, list=0%, signal=3%
REGULATION OF BIOLOGICAL QUALITY_BIO	28	0.174138	0.635633	0.938596	1	1	102	tags=14%, list=10%, signal=15%
MEMBRANE FRACTION_CEL	22	0.183884	0.635308	0.943396	1	1	337	tags=45%, list=32%, signal=65%
GET1_BIND	38	0.156825	0.631885	0.967638	1	1	225	tags=29%, list=21%, signal=35%
EARLY BIOFILM_UP	16	0.202659	0.63057	0.922865	1	1	309	tags=50%, list=29%, signal=69%
SPT3_BIND	35	0.158197	0.627498	0.962264	1	1	130	tags=17%, list=12%, signal=19%
CARBON-OXYGEN LYASE ACTIVITY_MOL	15	0.20229	0.627128	0.899471	1	1	850	tags=100%, list=80%, signal=492%
GET2_SGA	51	0.143741	0.6239	0.986799	1	1	139	tags=14%, list=13%, signal=15%
VMA13_SGA	15	0.201087	0.620302	0.923684	1	1	132	tags=20%, list=12%, signal=23%
CEM1_SGA	37	0.150645	0.613524	0.971609	1	1	132	tags=14%, list=12%, signal=15%
RTG2_SGA	32	0.154311	0.610373	0.973607	1	1	153	tags=22%, list=14%, signal=25%
PBS2_BIND	21	0.173054	0.609677	0.96	1	1	231	tags=33%, list=22%, signal=42%
MSN2_SGA	18	0.18756	0.605461	0.942363	1	1	866	tags=100%, list=81%, signal=530%
RPS17B_BIND	19	0.176245	0.602201	0.933333	1	1	878	tags=100%, list=83%, signal=564%
RSM7_SGA	21	0.172744	0.598182	0.947977	1	1	324	tags=43%, list=30%, signal=60%
RVS167_BIND	49	0.13609	0.591177	0.985714	1	1	221	tags=24%, list=21%, signal=29%
OAR1_SGA	26	0.159194	0.590208	0.972727	1	1	132	tags=19%, list=12%, signal=21%
CEG1-TS_SGA	25	0.155479	0.581475	0.979104	1	1	228	tags=28%, list=21%, signal=35%
SPT2_BIND	20	0.169515	0.58141	0.968	1	1	115	tags=15%, list=11%, signal=17%
CELL HOMEOSTASIS_BIO	15	0.179658	0.570353	0.967391	1	1	76	tags=13%, list=7%, signal=14%
BMH1_SGA	16	0.177678	0.563551	0.973958	1	1	265	tags=44%, list=25%, signal=57%
SPR3_SGA	17	0.173478	0.56159	0.958225	1	1	13	tags=6%, list=1%, signal=6%
SCS3_SGA	23	0.155178	0.558412	0.983516	1	1	252	tags=30%, list=24%, signal=39%
RPL7A_BIND	25	0.148359	0.55398	0.98374	1	1	120	tags=12%, list=11%, signal=13%
PFK2_BIND	24	0.153233	0.553186	0.974286	1	1	333	tags=38%, list=31%, signal=53%
SSF1_BIND	32	0.137449	0.545684	0.981818	1	1	689	tags=91%, list=65%, signal=250%
PTP3_SGA	19	0.16226	0.543854	0.979769	1	1	746	tags=95%, list=70%, signal=312%
RPL10_BIND	29	0.140402	0.543553	0.975831	1	1	120	tags=10%, list=11%, signal=11%
RPS14A_BIND	15	0.175572	0.529168	0.970027	1	1	878	tags=100%, list=83%, signal=566%
SRP101_DAMP_SGA	51	0.121603	0.529163	0.996732	1	1	138	tags=10%, list=13%, signal=11%
ALCOHOL METABOLIC PROCESS_BIO	34	0.137517	0.525923	1	1	1	384	tags=56%, list=36%, signal=85%
ORC2-4_SGA	17	0.161105	0.524085	0.983099	1	1	138	tags=18%, list=13%, signal=20%
RXT3_BIND	15	0.168254	0.52176	0.976684	1	1	101	tags=13%, list=10%, signal=15%
RPS21A_BIND	15	0.158761	0.509744	0.989418	1	1	264	tags=27%, list=25%, signal=35%
OAR1_BIND	17	0.15392	0.503588	0.981132	1	1	901	tags=100%, list=85%, signal=646%
RPP0_BIND	25	0.139426	0.501627	0.994012	1	1	221	tags=20%, list=21%, signal=25%
CTR9_BIND	21	0.142994	0.499653	1	1	1	913	tags=100%, list=86%, signal=695%
RPL37A_BIND	16	0.156948	0.494487	0.983871	1	1	214	tags=25%, list=20%, signal=31%
HOMEOSTATIC PROCESS_BIO	20	0.141623	0.485252	0.991404	1	1	305	tags=40%, list=29%, signal=55%
GEM1_BIND	15	0.152067	0.484905	0.97493	1	1	163	tags=20%, list=15%, signal=23%
YPT7_BIND	16	0.153773	0.474641	0.994475	1	1	901	tags=100%, list=85%, signal=646%
URA8_SGA	15	0.151825	0.468286	0.994253	1	1	750	tags=93%, list=71%, signal=313%
TUB3_BIND	16	0.147246	0.465167	0.9925	1	1	246	tags=25%, list=23%, signal=32%
COG7_SGA	25	0.129164	0.46502	0.99734	1	1	279	tags=28%, list=26%, signal=37%
TCP1-2_SGA	26	0.126326	0.463641	1	1	1	931	tags=100%, list=88%, signal=786%
APQ12_SGA	52	0.103291	0.457276	1	1	1	286	tags=29%, list=27%, signal=38%
SSF1_SGA	20	0.131263	0.445068	0.994429	1	1	662	tags=90%, list=62%, signal=234%
CHS6_SGA	15	0.133637	0.429057	0.997222	1	1	769	tags=93%, list=72%, signal=333%
SAS4_BIND	15	0.130403	0.41787	1	1	1	707	tags=93%, list=67%, signal=275%
UBC8_SGA	19	0.120402	0.403078	1	1	1	398	tags=58%, list=37%, signal=91%
STM1_BIND	37	0.0996158	0.3993	1	1	1	194	tags=16%, list=18%, signal=19%
SKI7_SGA	16	0.12633	0.396077	1	1	1	181	tags=19%, list=17%, signal=22%
AFG3_SGA	21	0.112988	0.392731	0.997006	0.999558	1	294	tags=33%, list=28%, signal=45%
