# Supplementary material for: The RSC (Remodels the Structure of Chromatin) complex of Candida albicans shows compositional divergence with distinct roles in regulating pathogenic traits
Source: PLoS Genet. 2020 Nov 5;16(11):e1009071. doi: 10.1371/journal.pgen.1009071 (PMC7671503; doi:10.1371/journal.pgen.1009071)
Supplement: S7 Table — (XLSX) [file pgen.1009071.s016.xlsx]

## Sheet: Fig 2
	Fig 2A. Frequencies of GO terms mapping to differentially expressed genes (RNA-Seq) and proteins (DIA-MS) in sth1 conditional mutant					Fig 2B. Log2 fold change values of RNAs (5% FDR) and their corresponding proteins (5% FDR) identified in sth1 conditional mutant
	GO term	Frequency (%)				Genes	Log2 Fold change
		RNA-Seq	DIA-MS				RNA	Protein
	biological process_unknown	24.5	24.1			C1_00160C_A	-0.86339	-0.247286
	regulation of biological process	21	18.5			C1_00180W_A	-0.78688	0.00221693
	transport	17.2	14.8			C1_00320W_A	-0.76563	-0.300242
	organelle organization	16.2	16			C1_00440W_A	0.450743	-0.0405163
	response to stress	14.8	14.2			C1_00470C_A	-0.7506	-0.672528
	response to chemical	13.2	13.6			C1_00490C_A	1.15116	0.703516
	RNA metabolic process	10.6	14.2			C1_00510W_A	-0.88316	-0.525529
	cellular protein modification process	9.3	5.6			C1_00520W_A	-1.00735	-0.683924
	filamentous growth	9.2	6.2			C1_00560W_A	1.00931	-0.311382
	cell cycle	7.5	4.9			C1_00650C_A	0.297915	0.338131
	DNA metabolic process	5.9	1.9			C1_00860W_A	0.737091	0.429033
	translation	5.3	4.9			C1_01090C_A	-0.89538	-0.352292
	vesicle-mediated transport	5.3	2.5			C1_01190C_A	-0.94806	-0.239912
	protein catabolic process	5.2	2.5			C1_01240W_A	-1.32079	-0.618074
	response to drug	5.2	3.1			C1_01250W_A	-0.47894	-0.139274
	ribosome biogenesis	5.1	8			C1_01370C_A	-0.8065	0.402984
	interspecies interaction	4.6	4.9			C1_01640W_A	0.560961	-0.180034
	lipid metabolic process	4.3	2.5			C1_01810C_A	0.588972	0.520346
	pathogenesis	4.1	4.9			C1_02060W_A	-0.91511	-1.10229
	signal transduction	2.9	4.3			C1_02330C_A	-1.81032	-0.0030799
	cell wall organization	2.7	4.9			C1_02650W_A	-0.74311	-0.384194
	generation of precursor metabolites and energy	2.1	4.3			C1_02720W_A	-0.46711	-0.850197
						C1_02760W_A	0.722144	0.400888
						C1_02790W_A	0.531478	0.162627
						C1_02920W_A	-1.14556	0.0911465
						C1_02990C_A	1.19037	0.51096
						C1_03130C_A	-0.62196	0.220229
						C1_03210C_A	0.926329	0.475021
						C1_03240W_A	0.656074	0.077992
						C1_03380W_A	-0.97344	-0.0462981
						C1_03520W_A	0.487528	-0.150316
						C1_03550C_A	-0.82099	-0.874366
						C1_03990W_A	1.48992	0.888027
						C1_04010C_A	1.65828	0.452156
						C1_04020C_A	1.26551	0.532103
						C1_04030W_A	-0.47353	-0.606018
						C1_04100C_A	-0.85045	-0.213596
						C1_04420C_A	-0.7499	-0.219049
						C1_04490W_A	-1.07082	-0.667825
						C1_04750W_A	1.10001	0.342943
						C1_04830W_A	-0.30961	-0.391445
						C1_04890W_A	-0.39173	-0.415608
						C1_05160C_A	-1.55282	-0.170172
						C1_05240C_A	0.986093	0.417421
						C1_05410C_A	0.986204	0.527767
						C1_05510C_A	0.70765	0.905637
						C1_05670W_A	-0.82946	-0.297056
						C1_05770C_A	-1.33517	-0.104866
						C1_06130C_A	0.814271	1.29501
						C1_06640C_A	-0.98872	-0.32994
						C1_06720C_A	-0.55162	-0.90527
						C1_06900C_A	-1.28009	-0.49015
						C1_06930W_A	0.89917	0.48321
						C1_07180W_A	-1.43119	-0.883051
						C1_07400C_A	0.475677	0.687343
						C1_08060W_A	-1.99362	-0.480968
						C1_08100W_A	0.702378	-0.284144
						C1_08140W_A	-0.78943	-0.893584
						C1_08430W_A	-1.52451	-0.336799
						C1_08740C_A	1.09954	0.435251
						C1_09030C_A	-0.67988	-0.308025
						C1_09260C_A	-1.32104	-0.593197
						C1_09470C_A	-0.70952	-0.761745
						C1_09630W_A	-0.65355	0.055049
						C1_10040W_A	1.16597	0.733031
						C1_10450W_A	0.432322	0.387454
						C1_10490W_A	-0.64888	-0.358777
						C1_10530W_A	-0.75177	-0.63958
						C1_10690W_A	-1.20624	-0.439544
						C1_10700C_A	-0.77209	-0.221105
						C1_10720C_A	-0.3878	-0.501536
						C1_10790W_A	0.843513	0.46104
						C1_10870W_A	-0.65881	0.0504989
						C1_10930C_A	-1.5071	-0.536381
						C1_11100W_A	-1.2578	-1.13955
						C1_11110C_A	-0.51442	-0.645899
						C1_11360W_A	-0.58784	0.0985066
						C1_11540C_A	-0.42679	-0.131547
						C1_11580W_A	-1.20085	-0.143554
						C1_11760C_A	-0.37065	-0.06217
						C1_11920W_A	-0.94247	-0.88976
						C1_12030W_A	-0.97848	-0.226168
						C1_12050W_A	0.806969	0.358148
						C1_12240C_A	-1.11502	-0.192579
						C1_12550C_A	0.430305	-0.0927641
						C1_13300C_A	0.882436	0.352956
						C1_13420C_A	-0.84002	-0.367371
						C1_13580W_A	0.769349	0.454249
						C1_13720W_A	0.496875	-0.469836
						C1_13920W_A	-1.57988	-0.2664
						C1_13940W_A	0.888057	0.801624
						C1_14500C_A	0.520431	0.290304
						C2_00410C_A	1.4656	-0.282926
						C2_00520W_A	-0.67653	-0.492428
						C2_00600C_A	-0.81813	-0.56896
						C2_00960C_A	0.942106	0.478287
						C2_01120W_A	1.53347	0.442919
						C2_01390W_A	-0.98994	-0.605894
						C2_01430W_A	-1.49183	-0.669369
						C2_02120W_A	0.908539	-0.268302
						C2_02370C_A	0.638996	0.427327
						C2_02380W_A	0.470174	0.262442
						C2_02620W_A	-1.74647	-0.391584
						C2_02690W_A	-0.77751	-0.517369
						C2_02720W_A	0.726038	0.275867
						C2_02920W_A	0.999822	1.71375
						C2_02930C_A	-1.4448	-1.51569
						C2_03060W_A	0.553629	0.207664
						C2_03080W_A	-0.62992	-0.521703
						C2_03130W_A	-0.64026	-0.634442
						C2_03280W_A	-0.5095	-0.0486779
						C2_03470C_A	-1.61637	-0.991479
						C2_03700W_A	-1.17513	-0.110703
						C2_04230W_A	-0.63312	-0.30969
						C2_04380C_A	-0.8972	-0.322123
						C2_04490W_A	-0.60296	-0.82012
						C2_04600C_A	-0.972	-0.153372
						C2_04700C_A	1.15715	-0.12871
						C2_04950C_A	-0.60243	-0.31863
						C2_05060C_A	0.84842	0.739484
						C2_05470W_A	-0.49974	-0.21942
						C2_05520W_A	0.726779	-0.576417
						C2_05610C_A	-0.71131	0.0320004
						C2_05660W_A	0.937525	0.661871
						C2_05930W_A	-1.01696	-0.888869
						C2_06080C_A	-1.01501	-0.437162
						C2_06150C_A	0.688942	0.283808
						C2_06310C_A	-0.85157	-0.590873
						C2_06550W_A	1.93963	1.82083
						C2_06640C_A	-1.26963	-0.31004
						C2_06720W_A	0.638958	0.572638
						C2_06890C_A	1.01395	0.568109
						C2_06950C_A	-0.52944	-0.290258
						C2_07350W_A	1.09923	0.240971
						C2_07400C_A	0.969534	0.518679
						C2_07920W_A	0.403855	-0.0729718
						C2_08160C_A	-0.54401	-0.295494
						C2_08500W_A	-0.72468	0.0437055
						C2_08780W_A	0.981013	0.298132
						C2_09260C_A	0.61974	0.656522
						C2_09520C_A	0.755479	0.292205
						C2_09640W_A	0.980739	0.271203
						C2_09720W_A	-0.54014	-0.360786
						C2_09810C_A	1.54127	0.486814
						C3_00200C_A	-2.08535	-0.186612
						C3_00290W_A	0.874468	0.329107
						C3_00330W_A	0.969479	-0.236748
						C3_00340W_A	-1.00483	-0.409219
						C3_00460W_A	-0.39185	-0.0152151
						C3_00500C_A	-0.97506	-1.27747
						C3_00610W_A	-0.82867	1.66924
						C3_00690C_A	0.697781	0.285961
						C3_00950C_A	-0.62787	-0.0335511
						C3_01280W_A	-1.15976	-0.271595
						C3_01410C_A	-1.07035	-0.453715
						C3_01490W_A	-1.31091	0.172852
						C3_01550C_A	0.547015	0.78884
						C3_01610W_A	-0.54806	-0.404502
						C3_01720C_A	0.553191	0.314424
						C3_01760W_A	0.82916	0.239208
						C3_02180C_A	-1.16385	-0.225495
						C3_02190C_A	-0.98913	-0.870942
						C3_02480C_A	-0.56328	0.176761
						C3_02500W_A	-1.07738	-0.973023
						C3_02600C_A	-0.66182	0.0345077
						C3_02810C_A	0.80801	0.288437
						C3_02920W_A	-1.13478	-0.382101
						C3_03010C_A	-0.955	-0.57561
						C3_03040W_A	-0.67614	-0.353188
						C3_03170W_A	0.659448	0.0923727
						C3_03180C_A	-0.70611	-0.573588
						C3_03400C_A	-1.02645	-0.348246
						C3_03420C_A	-1.01427	-0.372377
						C3_04080W_A	-0.82529	-0.188322
						C3_04130W_A	0.875196	0.346066
						C3_04330C_A	0.809204	0.310995
						C3_04520C_A	-0.72333	-0.188789
						C3_04960W_A	-1.22857	-0.409816
						C3_05000W_A	0.813507	0.402466
						C3_05070W_A	-1.79228	-0.574374
						C3_05180W_A	-0.98696	-0.409287
						C3_05200W_A	-0.70901	-0.0372279
						C3_05240C_A	-1.29498	-0.291595
						C3_05560W_A	0.75377	-0.185368
						C3_06230W_A	-0.45416	-0.503226
						C3_06360C_A	-0.82477	-0.238049
						C3_06440W_A	-0.82784	-0.310691
						C3_06490W_A	-1.13819	-0.00633453
						C3_06500W_A	0.635303	0.250786
						C3_06890W_A	1.22669	0.2792
						C3_07020W_A	-0.75691	-0.165712
						C3_07050W_A	-1.35609	-0.594141
						C3_07180C_A	-0.64886	-0.28326
						C3_07250W_A	-0.61477	-0.173217
						C3_07430W_A	-1.05081	-0.427297
						C3_07490W_A	-1.73469	-0.791445
						C3_07630C_A	0.682368	0.100662
						C3_07700W_A	-0.62223	-0.163338
						C3_07770C_A	0.756731	0.251593
						C3_07890W_A	-1.11177	-0.452666
						C3_07950C_A	0.664964	0.428863
						C4_00240C_A	0.572803	0.394791
						C4_00890W_A	-0.45154	-0.125564
						C4_01080W_A	-0.51688	-0.198363
						C4_01270W_A	-0.63672	0.0738708
						C4_01720C_A	-0.71008	-0.236714
						C4_01840C_A	-1.57145	-0.700915
						C4_01870C_A	-0.59193	-0.141312
						C4_01880W_A	-0.34637	-0.355741
						C4_01950W_A	-0.98016	-0.407551
						C4_02090C_A	-0.71725	-0.672636
						C4_03380C_A	-0.45116	-0.213688
						C4_03440C_A	1.10105	0.252343
						C4_03500C_A	1.2912	0.805801
						C4_04160W_A	-1.15274	-0.304395
						C4_04720W_A	-1.01083	-0.716714
						C4_04830W_A	0.549938	0.255887
						C4_05240C_A	-0.878	-0.308563
						C4_05460C_A	-0.91012	-0.423967
						C4_05560C_A	0.524185	0.487876
						C4_05690W_A	1.14168	0.468466
						C4_05850C_A	-0.4324	-0.567908
						C4_06050W_A	-1.14774	-0.302276
						C4_06120W_A	-1.47574	-0.240252
						C4_06270C_A	-1.4285	-0.550678
						C4_06480C_A	0.976455	0.823866
						C4_06500W_A	0.451095	0.124282
						C4_06690C_A	1.15709	1.15879
						C4_06780C_A	0.633089	0.298413
						C4_06840W_A	0.80494	-0.0948461
						C4_06870W_A	0.944632	0.337239
						C4_07060W_A	-0.56374	-0.962144
						C5_00080C_A	-0.59151	-0.115563
						C5_00900C_A	-0.96793	-0.268582
						C5_01110W_A	-0.91298	-0.396555
						C5_01210W_A	0.904874	0.300006
						C5_01520C_A	-0.95294	-0.270538
						C5_01560C_A	0.879509	0.501223
						C5_01890W_A	-1.25986	-0.768533
						C5_01940W_A	-0.80979	-0.467236
						C5_01970C_A	1.23595	0.500628
						C5_02030W_A	0.841881	0.456038
						C5_02300C_A	0.626198	0.582554
						C5_03100C_A	-1.66387	-0.968127
						C5_03240W_A	-1.52123	-0.237802
						C5_03280W_A	-1.41692	-0.239707
						C5_03390C_A	-1.05018	-0.513118
						C5_03490C_A	0.941748	0.729868
						C5_04130C_A	0.570893	0.402574
						C5_04640C_A	0.496096	0.240637
						C5_04940W_A	0.78121	1.05084
						C5_05320C_A	-0.768	0.218054
						C5_05390C_A	-0.76905	-0.655193
						C6_00210W_A	0.38221	0.0680731
						C6_00390W_A	-1.52197	-0.213163
						C6_00600C_A	-0.55691	-0.568487
						C6_00680C_A	-1.03206	-1.22594
						C6_00880W_A	0.831913	0.600368
						C6_01030W_A	-0.44488	-0.213206
						C6_01050W_A	-0.98514	-0.531419
						C6_01180C_A	0.9887	0.551303
						C6_01390W_A	-0.71503	-1.12554
						C6_01460C_A	1.14029	0.584173
						C6_02030C_A	-0.44334	0.264241
						C6_02120W_A	-0.76619	-0.363452
						C6_02260C_A	0.564277	0.30048
						C6_02480W_A	0.963428	0.39887
						C6_02800W_A	-1.18674	-1.02695
						C6_03620C_A	0.418385	0.600084
						C6_03630W_A	0.636747	0.658219
						C6_04320C_A	1.07483	0.61326
						C6_04360C_A	-0.70911	-0.366416
						C6_04420W_A	1.57394	0.836211
						C7_00020C_A	-0.47592	-0.303478
						C7_00140C_A	-0.48065	-0.288616
						C7_00250C_A	-0.92054	-0.358517
						C7_00340C_A	-0.89932	-0.576119
						C7_00530C_A	1.23525	-0.316559
						C7_00860W_A	-0.62899	0.665333
						C7_00990W_A	-0.85291	-0.172109
						C7_01850C_A	-1.8132	-0.817817
						C7_01920W_A	-0.43045	0.374612
						C7_01970C_A	-0.62365	-0.205355
						C7_02080W_A	-1.24847	-0.358855
						C7_02100W_A	-1.10845	-0.417092
						C7_02110W_A	-0.83544	-0.462783
						C7_02390W_A	-1.21269	-0.442561
						C7_02810W_A	1.11729	0.224993
						C7_03250C_A	1.50854	0.212188
						C7_03330C_A	-0.63484	-0.325025
						C7_03350C_A	-0.6669	-0.137854
						C7_03600W_A	0.430136	0.177447
						C7_03650W_A	-0.76659	-0.0241398
						C7_03860W_A	0.71206	0.558446
						C7_03870W_A	0.986452	0.468321
						C7_03960C_A	-0.8542	-0.657392
						C7_03980W_A	-0.90666	-0.46503
						C7_04010W_A	-0.55213	-0.296102
						C7_04020C_A	0.956856	0.299669
						C7_04040C_A	-0.51987	-0.54436
						C7_04280C_A	-1.03055	-0.275699
						CR_00200W_A	-1.18755	-0.500235
						CR_00320C_A	0.668343	0.40865
						CR_00340C_A	-0.68573	-1.27272
						CR_00360C_A	-1.31487	-0.276051
						CR_00380W_A	1.15681	0.415848
						CR_00410W_A	-0.98256	-0.0104318
						CR_00690C_A	-0.92599	-1.21789
						CR_01120C_A	-0.39363	0.525151
						CR_01310W_A	-0.57329	0.148507
						CR_01610C_A	0.961393	0.351851
						CR_02420W_A	0.790054	-0.101443
						CR_02620C_A	-0.71538	-0.706624
						CR_02670C_A	-0.61479	-0.668674
						CR_02930W_A	-0.61042	-0.825741
						CR_03170W_A	-0.54669	-0.136936
						CR_03280W_A	0.609508	0.370134
						CR_03380W_A	1.07966	-0.142876
						CR_03530W_A	-0.82042	-0.254471
						CR_03600C_A	0.59867	0.453772
						CR_03610C_A	-0.94021	-0.236999
						CR_03810W_A	-0.84606	1.11983
						CR_04080C_A	1.36562	0.359896
						CR_04390C_A	-0.57463	-0.502315
						CR_04490C_A	-0.88847	-0.171835
						CR_04500C_A	0.880585	0.322361
						CR_04580W_A	-0.77782	-0.471655
						CR_04810W_A	-0.92876	-0.0252276
						CR_05080W_A	-0.64245	-0.215787
						CR_05340C_A	-2.04114	-1.62697
						CR_05480W_A	-0.79993	-0.587783
						CR_05720W_A	-0.86971	-0.322423
						CR_05890C_A	-0.72587	-0.643743
						CR_06700C_A	-0.76222	-0.047267
						CR_07010W_A	-0.63271	-0.100055
						CR_07320C_A	-0.89173	-0.404766
						CR_07330W_A	-0.8114	-0.53983
						CR_07340C_A	-1.25349	-0.56957
						CR_07660C_A	0.613672	0.216662
						CR_07790C_A	-1.37689	-0.607492
						CR_07950W_A	1.45205	-0.313044
						CR_08050C_A	0.412452	0.289287
						CR_08150W_A	-1.00379	-0.13369
						CR_08350W_A	0.647533	0.41533
						CR_08370W_A	-0.78688	-0.615347
						CR_08620C_A	-0.84093	-0.511574
						CR_09100C_A	0.895325	0.58337
						CR_10040W_A	-1.61741	-0.207233
						CR_10230W_A	0.845888	0.340308
						CR_10280W_A	-1.06185	-0.628625
						CR_10370W_A	0.392573	-0.0431486
						CR_10490W_A	-0.65908	-0.463501
						CR_10650W_A	2.00127	0.0686353
						CR_10660W_A	1.0071	0.272423
						CR_10670W_A	0.469486	0.442269
						CR_10690W_A	1.53863	-0.771636

## Sheet: Fig 4
	Fig 4B. Hyphal lengths (µm)								Fig 4C. Mean percentages of yeast cells in nri1∆∆ and re-integrant cells induced to form hyphae under indicated conditions
	Spider media			FBS media					Condition	nri1∆∆+NRI1			nri1∆∆
	Cell#	nri1∆∆	nri1∆∆+NRI1	Cell#	nri1∆∆	nri1∆∆+NRI1				Rep1	Rep2	Rep3	Rep1	Rep2	Rep3
	1	7.259	16.267	1	11.136	8.275			Spider (90 min)	4.5	4	7.5	26	30.5	31
	2	7.282	18.282	2	14.982	8.481			Spider prolonged (150 min)				27.5	31	41.5
	3	7.874	20.526	3	15.705	9.419			FBS (90 min)	14.5	4	15.4	30.5	30	30.5
	4	8.462	21.545	4	15.791	9.784			FBS prolonged (150 min)				44.5	40.9	51.2
	5	8.612	22.075	5	15.991	9.876
	6	8.842	22.69	6	18.301	10.159
	7	9.156	23.042	7	19.875	10.352
	8	10.163	23.227	8	21.635	10.37
	9	10.164	23.366	9	21.93	10.544
	10	10.212	23.631	10	22.632	10.807
	11	10.252	23.655	11	23.567	11.003
	12	10.28	23.688	12	23.997	11.024
	13	10.285	23.852	13	24.051	11.055
	14	10.329	24.427	14	26.001	11.104
	15	10.357	24.471	15	26.481	11.465
	16	11.029	24.478	16	26.701	11.993
	17	11.125	24.478	17	27.836	12.258
	18	11.156	24.554	18	28.1	12.482
	19	11.261	24.708	19	28.195	12.717
	20	11.506	24.827	20	28.241	12.756
	21	11.663	25.242	21	28.445	13.094
	22	11.759	25.371	22	28.712	13.177
	23	11.819	25.505	23	28.749	13.994
	24	11.831	25.898	24	29.332	14.442
	25	12.021	26.328	25	29.351	14.641
	26	12.045	26.362	26	29.443	14.812
	27	12.065	26.377	27	29.748	15.017
	28	12.24	26.497	28	30.021	15.188
	29	12.623	26.743	29	30.28	15.228
	30	12.699	26.946	30	30.318	15.357
	31	12.934	26.95	31	30.356	15.696
	32	12.966	27.079	32	30.765	15.751
	33	13.608	27.303	33	30.902	16.162
	34	13.716	27.405	34	30.977	16.165
	35	13.737	27.519	35	31.184	16.322
	36	13.75	27.647	36	31.371	16.361
	37	13.866	27.688	37	31.396	16.443
	38	14.091	27.702	38	31.535	16.466
	39	14.316	28.036	39	31.689	16.642
	40	14.437	28.185	40	31.848	16.647
	41	14.533	28.463	41	32.334	16.96
	42	14.558	28.591	42	32.434	17.143
	43	14.627	28.767	43	32.537	17.155
	44	14.813	28.775	44	32.743	17.469
	45	14.822	28.857	45	32.883	17.593
	46	14.862	28.897	46	33.211	17.739
	47	14.905	29.138	47	33.383	18.041
	48	14.905	29.216	48	33.557	18.433
	49	14.924	29.25	49	33.734	18.663
	50	14.934	29.291	50	33.882	18.756
	51	14.994	29.482	51	33.989	18.862
	52	15.054	29.527	52	34.287	18.956
	53	15.11	29.68	53	34.518	18.958
	54	15.111	29.881	54	34.645	19.196
	55	15.131	29.888	55	35.3	19.224
	56	15.157	29.985	56	35.308	19.28
	57	15.341	30.046	57	35.439	19.373
	58	15.349	30.27	58	35.505	19.459
	59	15.356	30.34	59	35.531	19.949
	60	15.38	30.439	60	35.581	20.047
	61	15.473	31.142	61	35.839	20.072
	62	15.851	31.23	62	35.941	20.473
	63	15.87	31.455	63	35.946	21.152
	64	15.886	31.49	64	36.487	21.307
	65	15.949	31.52	65	36.505	21.692
	66	16.062	31.793	66	36.506	21.718
	67	16.276	32.075	67	36.537	22.147
	68	16.285	32.133	68	36.669	22.196
	69	16.387	32.147	69	36.966	22.375
	70	16.438	32.286	70	36.976	22.566
	71	16.511	32.302	71	37.024	22.704
	72	16.592	32.453	72	37.106	22.747
	73	16.674	32.458	73	37.313	22.955
	74	16.984	32.463	74	37.323	23.095
	75	16.988	32.488	75	37.377	23.135
	76	16.991	32.627	76	37.647	23.208
	77	17.193	32.674	77	37.875	23.242
	78	17.208	32.676	78	37.895	24.254
	79	17.456	32.856	79	38.238	24.458
	80	17.788	32.963	80	38.335	24.554
	81	18.225	33.549	81	38.769	24.629
	82	18.266	33.622	82	38.99	25
	83	18.313	33.776	83	39.019	25.045
	84	18.316	33.846	84	39.114	25.119
	85	18.978	34.168	85	39.389	25.147
	86	19.03	34.549	86	39.437	25.167
	87	19.069	35.027	87	39.49	25.196
	88	19.246	35.188	88	39.599	25.238
	89	19.284	35.37	89	39.753	25.505
	90	19.534	36.116	90	39.773	25.526
	91	19.547	36.231	91	39.786	25.909
	92	19.669	36.512	92	39.847	26.119
	93	19.941	36.571	93	40.043	26.162
	94	20.102	36.669	94	40.117	26.521
	95	20.175	36.866	95	40.131	26.521
	96	20.6	37.2	96	40.2	26.576
	97	20.915	37.231	97	40.235	26.749
	98	20.938	37.289	98	40.309	27.166
	99	21.021	37.529	99	40.331	27.206
	100	21.166	37.544	100	40.589	27.345
	101	21.17	37.67	101	40.59	27.377
	102	21.252	37.831	102	40.652	27.447
	103	21.364	37.897	103	40.861	27.473
	104	21.376	37.954	104	40.917	27.612
	105	21.378	38.046	105	40.967	27.663
	106	21.587	38.248	106	41.142	27.765
	107	21.636	38.347	107	41.154	27.985
	108	21.916	38.383	108	41.37	28.031
	109	21.943	38.411	109	42.528	28.13
	110	21.974	38.414	110	42.536	28.171
	111	21.992	39.123	111	42.657	28.255
	112	22.025	39.285	112	42.89	28.335
	113	22.105	39.631	113	42.93	28.495
	114	22.112	39.648	114	43.473	28.565
	115	22.144	39.951	115	43.65	28.667
	116	22.248	39.971	116	43.957	28.848
	117	22.907	40.252	117	44.081	28.866
	118	23.078	40.444	118	44.502	29.204
	119	23.529	40.626	119	44.533	29.323
	120	23.592	40.76	120	44.539	29.523
	121	23.604	40.901	121	44.85	29.85
	122	23.958	41.119	122	44.863	29.888
	123	24.03	41.358	123	45.115	30.015
	124	24.164	41.843	124	45.148	30.486
	125	24.202	42.864	125	45.269	30.668
	126	24.421	43.359	126	45.357	30.795
	127	24.424	43.546	127	47.091	30.815
	128	24.425	43.751	128	47.107	31.218
	129	24.677	43.889	129	47.409	31.481
	130	24.984	44.117	130	47.497	31.55
	131	25.433	44.507	131	47.619	31.869
	132	25.605	44.713	132	47.789	32.255
	133	25.655	45.042	133	47.906	32.687
	134	25.927	45.384	134	48.065	33.346
	135	26.301	45.77	135	48.088	34.178
	136	26.751	45.882	136	48.798	34.55
	137	26.776	45.975	137	48.956	35.887
	138	27.215	46.053	138	49.62	36.335
	139	27.835	47.695	139	49.816	36.736
	140	29.986	48.019	140	50.498	36.762
	141	30.498	48.031	141	50.566	36.945
	142	30.553	48.411	142	50.722	37.04
	143	30.667	49.634	143	51.411	37.159
	144	32.291	52.888	144	51.609	37.465
	145	32.499	53.957	145	51.664	38.529
	146	33.277	53.975	146	52.301	38.978
	147	33.399	54.179	147	53.372	39.059
	148	33.845	57.017	148	54.144	41.115
	149	35.424	59.454	149	56.95	43.834
	150	35.861	63.498	150	57.033	44.684

## Sheet: Fig 6
	Fig 6A. Survival percentage of mice infected with rsc4∆∆ and re-integrant cells on various dpi						Fig 6B. C. albicans colony forming units from kidney of mice infected with the indicated strains
	Days Post Infection	Wild type	rsc4∆∆	rsc4∆∆+RSC4			rsc4∆∆	rsc4∆∆+RSC4
	0	100	100	100			21574	307179
	5	40	100	90			6844.63	86124.4
	6	10	100	70			14906.8	261078
	7	0	100	30			5777.17	36101.1
	8	0	100	0			15468.1	198347
	11	0	90	0
	12	0	70	0
	14	0	60	0
	21	0	60	0

## Sheet: S1 Fig
					S1B Fig. Absorbance (OD 600) values for the growth profiles of C. albicans cells described in figure S1B
					Time (hours)	nri1∆∆			nri1∆∆+NRI1
						Rep1	Rep2	Rep3	Rep1	Rep2	Rep3
					0	0.15	0.15	0.15	0.15	0.15	0.15
					1.5	0.279	0.25	0.211	0.237	0.226	0.193
					3	0.467	0.442	0.352	0.428	0.368	0.368
					4.5	0.766	0.716	0.569	0.855	0.639	0.724
					6	1.692	1.586	1.302	2.94	1.65	2.628
					7.5	3.9	4.29	3.06	7.11	5.52	6.41
					9	7.94	7.3	5.8	12.84	10.32	12
					10.5	10.94	12.45	9	17.5	16.55	18.15
					12	15.9	15.7	14.3	20.6	19.8	21.45
					13.5	18.2	18.3	18.65	21.35	20.25	21.45
					15	18.3	19.05	20.3	21.5	21.05	23.7

## Sheet: S3 Fig
			S3D Fig. Absorbance (OD 600) values for the growth profiles of C. albicans cells described in figure S3D
			Time (hours)	MT-Dox			RP-Dox			RP+Dox
				Rep1	Rep2	Rep3	Rep1	Rep2	Rep3	Rep1	Rep2	Rep3
			0	0.0879	0.0874	0.0885	0.0963	0.1047	0.0999	0.0907	0.0934	0.0951
			1	0.0919	0.091	0.0927	0.0987	0.1035	0.1012	0.0935	0.0986	0.0994
			2	0.0981	0.0977	0.0999	0.1032	0.1092	0.1065	0.0969	0.1032	0.1034
			3	0.1079	0.108	0.1106	0.1071	0.115	0.1111	0.0997	0.1077	0.1077
			4	0.1241	0.1256	0.1285	0.1106	0.1201	0.1149	0.1026	0.1118	0.1117
			5	0.1497	0.1519	0.1567	0.1143	0.1252	0.119	0.1052	0.1154	0.1158
			6	0.186	0.1908	0.1964	0.1184	0.1307	0.1241	0.1074	0.1191	0.1188
			7	0.2399	0.2498	0.2556	0.1221	0.1365	0.1291	0.11	0.1223	0.1222
			8	0.3102	0.3329	0.3359	0.1269	0.1433	0.135	0.1122	0.1254	0.1253
			9	0.395	0.4365	0.4353	0.1332	0.1516	0.1418	0.1142	0.1287	0.1283
			10	0.5073	0.5643	0.5611	0.1423	0.1631	0.151	0.1167	0.1316	0.1314
			11	0.6304	0.7059	0.7043	0.1553	0.1785	0.1624	0.1185	0.135	0.1343
			12	0.7731	0.8699	0.8634	0.173	0.198	0.1782	0.1209	0.1381	0.1374
			13	0.9281	1.0379	1.027	0.1968	0.2217	0.197	0.123	0.1408	0.1401
			14	1.081	1.1918	1.1797	0.228	0.2521	0.2214	0.125	0.1436	0.1429
			15	1.2309	1.3378	1.3273	0.2654	0.289	0.2503	0.127	0.1464	0.1459
			16	1.3582	1.4539	1.4445	0.3124	0.3314	0.2857	0.1294	0.1493	0.1486
			17	1.461	1.5459	1.537	0.3694	0.3821	0.3274	0.1314	0.1529	0.1512
			18	1.5507	1.6251	1.6178	0.4434	0.4422	0.3758	0.1334	0.1561	0.1538
			19	1.6029	1.6763	1.667	0.5268	0.5109	0.4335	0.1352	0.1599	0.1569
			20	1.6288	1.7066	1.6943	0.6254	0.5901	0.4998	0.1376	0.1614	0.1597
			21	1.6395	1.7198	1.7058	0.7346	0.6746	0.5759	0.1399	0.1643	0.1633
			22	1.6422	1.7226	1.7057	0.852	0.7698	0.6622	0.1416	0.1671	0.1659

## Sheet: S5 Fig
		S5 Fig. Transcription factor analysis of sth1 gene expression profile in C. albicans using PathoYeastract
		Transcription factor	Percent in user set	Percent in PathoYeastract database	p-value	Genes/Targets
		Tbf1p	0.0659	0.318	0	RPL16A	C1_01360C_A	RPS21B	RPS21	C1_01490W_A	C1_01630W_A	C1_02330C_A	TIM21	HOL1	RPP1A	RPL13	C1_03040W_A	RPL6	C1_05720W_A	C1_05740C_A	RPS14B	RPS23A	MMD1	FGR41	RPS17B	RPL29	RPL37B	C2_00200W_A	RPL38	RPS9B	SCH9	RPL17B	C2_05410W_A	RPS8A	PMT4	GSP1	RPL11	PRE2	DFG10	C2_09030W_A	FCY21	FGR29	RPS4A	C2_10630W_A	RPS7A	C3_01680C_A	C3_01890C_A	RPL9B	C3_02490C_A
		Cwt1p	0.0707	0.2862	0	RPL16A	C1_01360C_A	RPS21	RPP1A	RPL13	RPL6	C1_03470C_A	C1_03840W_A	C1_03870C_A	C1_05160C_A	RPS27A	C1_05720W_A	PHO87	GLT1	HAK1	C1_09520C_A	LIP3	FGR41	RPS17B	C1_11010C_A	C1_11320C_A	RPL37B	PHO84	C1_11710C_A	MSO1	SIM1	RPL38	C2_01630W_A	C2_02130C_A	UTP21	PGA17	RPL17B	RPL11	C2_09930W_A	C2_10070W_A	UBC15	RPS4A	RPS7A	C3_01820W_A	C3_02080W_A	RPL9B	C3_04870W_A	RPL18	RPS19A
		Csr1p	0.0985	0.2362	0	C1_00160C_A	RPL16A	TTR1	POX18	C1_01630W_A	C1_02510W_A	C1_02890C_A	RPP1A	RPL13	C1_03870C_A	C1_04010C_A	CSH1	URA6	ERG3	C1_05720W_A	PRC3	C1_05970W_A	GLT1	COI1	C1_08660C_A	C1_09210C_A	C1_09430W_A	LIP1	C1_09650W_A	ERO1	C1_10280C_A	RPL29	C1_11920W_A	C1_12920C_A	C1_13130C_A	RPN1	DDI1	RPL38	DFG5	MXR1	PGA17	C2_04390W_A	C2_04440W_A	PNG2	C2_05820W_A	RPN10	VAS1	RPL11	PRE2
		Cta8p	0.2629	0.2326	0	C1_00020C_A	C1_00160C_A	TTR1	C1_00530C_A	ROT1	GEM1	C1_01090C_A	C1_01140C_A	C1_01190C_A	STB5	C1_01360C_A	RPS21B	RPS21	ARP8	TIM21	MNN44	RPP1A	RPL13	SEC62	TPS2	C1_03990W_A	C1_04010C_A	CSH1	POR1	URA6	C1_04470C_A	ERG3	C1_04910C_A	C1_05160C_A	C1_05360C_A	C1_05400C_A	TRP99	RSM22	RPS27A	SSH1	C1_05540C_A	C1_05720W_A	PHO87	C1_05990C_A	GLT1	HAK1	NAA20	PCL7	CCS1
		Hap43p	0.1295	0.2325	0	RPL16A	C1_00510W_A	C1_00530C_A	C1_01190C_A	STB5	RPS21B	C1_02330C_A	TIM21	C1_02490C_A	C1_02650W_A	C1_02890C_A	XOG1	TPS2	SAP7	BRG1	C1_05160C_A	RPT1	C1_05540C_A	RIB4	C1_05670W_A	PGA26	PRN2	GLT1	C1_06560W_A	HAK1	NOP6	CCS1	COI1	OFR1	CAF16	C1_08440C_A	C1_08490W_A	C1_08760W_A	C1_08780W_A	AFG1	COX5	C1_09650W_A	SFU1	C1_10090C_A	C1_10560C_A	C1_10580C_A	RPS17B	UBA4	C1_11010C_A
		Wor1p	0.0842	0.2325	0	C1_00160C_A	RPS21	HSP31	XOG1	RPL13	C1_04010C_A	CSH1	C1_04470C_A	ERG3	SAP7	BRG1	RPS27A	HAC1	C1_07490C_A	C1_09430W_A	HCM1	C1_10580C_A	FCY23	RPS17B	C1_10980W_A	GIN1	PHO84	C1_12240C_A	MSH6	C1_13180W_A	SIM1	SAP30	HNM1	C2_03700W_A	C2_04440W_A	C2_04450W_A	CYT1	CSM3	GSP1	PRE2	C2_07790C_A	IPP1	GLO2	PMS1	C2_10150W_A	RPS4A	C2_10730W_A	C3_02190C_A	C3_02390W_A
		Nrg1p	0.3153	0.2181	0	RIM8	C1_00470C_A	C1_00520W_A	C1_01090C_A	C1_01140C_A	RPS21B	POX18	HOL4	SWI4	PTR3	PGA5	C1_02510W_A	C1_02760W_A	XOG1	HOL1	RPL6	C1_03180W_A	CDC12	SEC62	C1_03460C_A	C1_03690W_A	C1_03870C_A	C1_03990W_A	C1_04010C_A	CSH1	POR1	URA6	C1_04560W_A	ERG3	C1_04800C_A	SAP7	C1_04910C_A	C1_04930C_A	RHD1	BRG1	TRP99	SSH1	C1_05540C_A	C1_05670W_A	PRC3	C1_05990C_A	C1_06000W_A	SPO22	C1_06920C_A
		Cbf1p	0.1859	0.2086	0	CDC13	C1_00860W_A	GEM1	C1_01090C_A	RPS21	C1_01490W_A	C1_01750W_A	TIM21	XOG1	HOL1	RPP1A	RPL6	C1_03470C_A	C1_03870C_A	C1_03990W_A	CSH1	C1_04490W_A	C1_04930C_A	C1_04940C_A	C1_05160C_A	RPS27A	PHO87	C1_06360W_A	RPS14B	GLT1	C1_06560W_A	RPS23A	MMD1	YPD1	C1_07480C_A	COI1	SEC24	YMC2	PTC1	FGR43	C1_09980C_A	SFU1	C1_10050W_A	C1_10060C_A	SNL1	C1_10560C_A	TBP1	C1_10690W_A	RPS17B
		Pho4p	0.3296	0.206	0	C1_00160C_A	CDC13	C1_00470C_A	C1_00510W_A	C1_00530C_A	CIS2	ZCF17	C1_01190C_A	C1_01360C_A	POX18	C1_01460W_A	C1_01750W_A	HOL4	SWI4	HSP31	C1_02380C_A	C1_02490C_A	C1_02510W_A	MNN44	C1_02750C_A	C1_02780W_A	XOG1	C1_03040W_A	ORC1	C1_03140W_A	C1_03180W_A	TPS2	C1_03450C_A	C1_03460C_A	C1_03690W_A	C1_03870C_A	C1_04010C_A	CSH1	C1_04470C_A	C1_04490W_A	IFE1	C1_04800C_A	MNN15	C1_04910C_A	C1_04930C_A	RHD1	BRG1	RPT1	MTM1
		Cas5p	0.1597	0.2057	0	C1_00020C_A	RIM8	C1_00160C_A	C1_00510W_A	C1_01140C_A	HOL4	HSP31	TIM21	C1_02380C_A	C1_02650W_A	C1_02770W_A	HOL1	C1_03240W_A	C1_03460C_A	C1_04010C_A	CSH1	C1_04470C_A	IFE1	SAP7	MNN15	BRG1	C1_05200C_A	TRP99	RIB4	PGA26	PHO87	HAC1	HAK1	C1_06640C_A	PCL7	C1_07860W_A	SEC24	YMC2	PPT2	C1_09650W_A	HCM1	PET100	ERO1	C1_10050W_A	ECM21	C1_10250C_A	RPA34	FGR41	FCY23
		Rob1p	0.139	0.203	0	RIM8	TTR1	ZCF17	C1_01630W_A	HOL4	C1_02760W_A	CDC73	XOG1	NGG1	C1_03460C_A	C1_03870C_A	BRG1	C1_05160C_A	RPT1	TRP99	PHO87	CCS1	C1_09210C_A	C1_09430W_A	PPT2	C1_09770W_A	SFU1	C1_10280C_A	C1_10580C_A	FCY23	TBP1	C1_10950C_A	C1_11270W_A	PHO84	BTA1	SER33	C1_13130C_A	C1_13490C_A	DDI1	C1_14470W_A	C1_14530W_A	C2_00050C_A	DFG5	HNM1	C2_01630W_A	RAD23	C2_02290C_A	UTP21	C2_02550C_A
		Tye7p	0.2383	0.2022	0	RIM8	C1_00160C_A	TTR1	C1_00520W_A	C1_01140C_A	ZCF17	C1_01360C_A	RPS21B	ARP8	C1_01750W_A	SWI4	C1_02650W_A	MNN44	C1_02760W_A	C1_02780W_A	C1_02890C_A	XOG1	RPP1A	CDC12	TPS2	C1_03450C_A	C1_03460C_A	C1_03990W_A	C1_04010C_A	CSH1	C1_04470C_A	ERG3	BRG1	C1_05160C_A	C1_05380C_A	RPS27A	C1_05540C_A	RIB4	PHO87	HAC1	GLT1	PCL7	PGA63	YPD1	C1_07490C_A	C1_07820W_A	C1_08180C_A	C1_08490W_A	YMC2
		Skn7p	0.108	0.1971	0	C1_00020C_A	C1_01090C_A	IFD3	RPS21B	HSP31	XOG1	C1_03140W_A	C1_03400W_A	C1_03870C_A	C1_04010C_A	CSH1	C1_04470C_A	IFE1	RHD1	BRG1	C1_05160C_A	C1_05540C_A	RIB4	PGA26	HAC1	HAK1	PHO100	C1_08780W_A	C1_09210C_A	C1_09520C_A	MLS1	C1_09770W_A	PET100	C1_10050W_A	C1_10060C_A	CLA4	C1_10280C_A	FGR41	GIN1	PHO84	VPH2	C1_13290W_A	SIM1	C1_14550C_A	HNM1	STP4	C2_03700W_A	SCH9	C2_05410W_A
		Hmo1p	0.1469	0.1964	0	C1_00540C_A	CIS2	ROT1	C1_01140C_A	ARP8	HOL4	SWI4	C1_02330C_A	C1_02380C_A	GGA2	C1_03140W_A	TPS2	C1_03460C_A	C1_03470C_A	C1_03870C_A	C1_04010C_A	ERG3	RHD1	C1_05160C_A	SSH1	C1_05540C_A	C1_06000W_A	RPS14B	C1_07080W_A	COI1	C1_08180C_A	C1_08780W_A	C1_09840C_A	SFU1	ECM21	LKH1	C1_11270W_A	C1_11320C_A	RVS162	C1_12920C_A	C1_13130C_A	RPN1	SIM1	HNM1	APT1	RAD7	RAD23	C2_02550C_A	UGA6
		Mcm1p	0.2264	0.1952	0	C1_00160C_A	RPL16A	C1_00540C_A	CIS2	CNS1	ZCF17	C1_01360C_A	RPS21B	RPS21	C1_01630W_A	UGA2	PTR3	HSP31	C1_02330C_A	TIM21	C1_02650W_A	XOG1	RPL13	ORC1	RPL6	CDC12	COQ6	C1_03870C_A	C1_03990W_A	C1_04010C_A	CSH1	ERG3	C1_04800C_A	BRG1	C1_05200C_A	C1_05360C_A	MTM1	RPS27A	SSH1	C1_05610W_A	C1_05720W_A	C1_05740C_A	C1_06360W_A	RPS14B	GLT1	PGA63	CCS1	PHO100	COI1
		Efg1p	0.2105	0.1894	0	C1_01140C_A	ZCF17	C1_01360C_A	POX18	RPS21	C1_01490W_A	ARP8	HSP31	XOG1	HOL1	RPL6	CDC12	TPS2	C1_03870C_A	CSH1	C1_04470C_A	ERG3	SAP7	C1_04910C_A	RHD1	BRG1	C1_05160C_A	TRP99	RPS27A	C1_05540C_A	RIB4	C1_05720W_A	PHO87	HAC1	RPS14B	RPS23A	C1_07080W_A	C1_07480C_A	CAF16	C1_08760W_A	PTC1	IDH1	ADE12	MLS1	URA1	BUD31	LIP3	C1_09910C_A	SFU1
		Ron1p	0.3956	0.1884	0	C1_00020C_A	RIM8	C1_00160C_A	C1_00510W_A	C1_00520W_A	C1_00530C_A	ROT1	C1_01090C_A	ZCF17	STB5	IFD3	C1_01360C_A	POX18	C1_01460W_A	C1_01540W_A	C1_01750W_A	SWI4	PTR3	HSP31	C1_02330C_A	TIM21	PGA5	C1_02380C_A	C1_02490C_A	MNN44	CDC73	XOG1	HOL1	RPP1A	RPL13	RPL6	C1_03140W_A	C1_03180W_A	C1_03460C_A	C1_03630W_A	C1_03660W_A	C1_03690W_A	C1_03870C_A	C1_04010C_A	CSH1	C1_04470C_A	IFE1	ERG3	SAP7
		Sko1p	0.2033	0.1878	0	C1_00020C_A	C1_00160C_A	CDC13	TTR1	CNS1	C1_01140C_A	C1_01360C_A	RPS21	C1_01490W_A	C1_02650W_A	XOG1	TPS2	C1_03450C_A	C1_03660W_A	C1_04010C_A	CSH1	ERG3	BRG1	C1_05160C_A	RSM22	SSH1	C1_05540C_A	RIB4	PGA26	PHO87	HAC1	HAK1	NOP6	PCL7	C1_06920C_A	C1_07820W_A	COI1	OFR1	CAF16	C1_08490W_A	SEC24	C1_08780W_A	AFG1	COX5	PTC1	C1_09430W_A	IDH1	C1_09650W_A	URA1
		Ndt80p	0.1676	0.1849	0	TTR1	C1_00540C_A	C1_01140C_A	IFD3	C1_01360C_A	RPS21	C1_01490W_A	C1_01630W_A	HSP31	XOG1	HOL1	TPS2	C1_03460C_A	C1_03870C_A	C1_04010C_A	CSH1	C1_04470C_A	IFE1	ERG3	SAP7	C1_04930C_A	RHD1	BRG1	C1_05160C_A	C1_05200C_A	TRP99	MTM1	PGA26	PHO87	HAC1	GLT1	C1_07080W_A	PHO100	OFR1	C1_09210C_A	IDH1	MLS1	C1_09770W_A	HCM1	C1_09950C_A	SFU1	C1_10060C_A	ECM21	C1_10280C_A
		Sfl1p	0.224	0.1847	0	C1_00160C_A	CDC13	CIS2	C1_01140C_A	C1_01360C_A	C1_01540W_A	C1_01750W_A	C1_02060W_A	C1_02330C_A	TIM21	C1_02510W_A	CDC12	TPS2	C1_03460C_A	CSH1	C1_04470C_A	RHD1	BRG1	C1_05360C_A	C1_05400C_A	RSM22	PRN2	PHO87	C1_05990C_A	HAC1	RPS23A	NOP6	PCL7	COI1	C1_08140W_A	YMC2	C1_08780W_A	C1_09210C_A	C1_09520C_A	MLS1	C1_09980C_A	SFU1	C1_10050W_A	C1_10080W_A	C1_10090C_A	CLA4	RPA34	SNL1	C1_10580C_A
		Sfl2p	0.1835	0.1822	0	RIM8	C1_00160C_A	C1_01140C_A	C1_01490W_A	C1_01750W_A	C1_02330C_A	C1_02780W_A	XOG1	C1_03140W_A	C1_03240W_A	C1_03460C_A	C1_03690W_A	C1_03870C_A	C1_04010C_A	CSH1	ERG3	SAP7	RHD1	BRG1	C1_05200C_A	C1_05540C_A	PHO87	C1_06000W_A	HAC1	GLT1	RPS23A	NOP6	COI1	YMC2	COX5	IDH1	MLS1	HCM1	C1_09910C_A	SFU1	ECM21	CLA4	FGR41	C1_10560C_A	FCY23	HAP43	C1_11320C_A	PHO84	C1_11710C_A
[truncated: 454 more columns]

## Sheet: S7 Fig
					S7A Fig. Percent death of indicated strains upon phagocytosis by human neutrophils (MOI 1)					S7B Fig. Percent of macrophage death (MOI 1) in the indicated strains assessed by live cell imaging for 24 hours
					Strain	Rep1	Rep2			Time (hours)	Wild type		rsc4∆∆		rsc4∆∆+RSC4		Macrophages only
					Wild type	55.15	45.58				Rep1	Rep2	Rep1	Rep2	Rep1	Rep2
					rsc4∆∆	65.34	61.42			0	2.6602	3.49012	3.45087	2.89674	2.59763	3.26299	2.39163
					rsc4∆∆+RSC4	49.51	41.66			0.25	2.54201	3.35387	3.53385	2.96272	3.04561	3.65508	2.73327
										0.5	2.91689	3.73198	4.1531	3.70023	3.13117	3.89739	2.81057
										0.75	3.01644	3.79231	4.14446	3.61436	3.16005	4.16674	2.88478
										1	3.20084	4.3873	4.31953	4.10622	3.59884	4.46068	3.26973
										1.25	3.32152	4.26113	4.64584	3.99332	3.91226	4.33141	3.37638
										1.5	3.39976	4.16836	4.75007	4.35974	4.13209	4.81467	3.36712
										1.75	3.36297	4.1434	4.47985	3.90189	3.73217	4.53341	3.17542
										2	3.59907	4.71036	4.77662	4.23938	3.97977	4.83506	3.43667
										2.25	3.74522	4.41188	5.01989	4.43207	4.43121	5.1298	3.3532
										2.5	3.87265	4.68909	5.1681	4.44564	4.59684	5.30791	3.51552
										2.75	4.09646	4.81755	5.461	4.90919	4.44251	5.48237	3.61446
										3	4.04912	4.76969	5.39319	4.83119	4.7438	5.29472	4.05506
										3.25	4.0881	4.70491	5.77821	4.98216	4.76103	5.70533	3.6268
										3.5	4.19544	4.84016	5.81388	4.96799	5.02952	5.53285	3.83089
										3.75	4.14245	4.69046	6.09218	5.03548	4.84529	5.39131	3.77523
										4	4.26836	4.69583	5.97282	4.9952	5.11132	5.78914	3.81388
										4.25	4.2052	4.43987	5.85288	4.74283	4.94293	5.35697	3.54024
										4.5	4.53038	4.81014	6.26026	5.25367	5.41723	5.89771	4.0396
										4.75	4.39907	4.74842	6.55583	5.19856	5.62035	5.55389	3.86799
										5	4.50234	4.82531	6.52807	5.11029	5.56983	5.47863	3.98394
										5.25	4.3687	4.94367	6.58133	4.74288	5.23134	5.2859	3.93757
										5.5	4.55616	4.93087	6.63408	5.13255	5.69886	5.78112	3.92056
										5.75	4.22511	4.75312	6.48468	4.77352	5.38506	5.74861	3.84789
										6	4.41848	4.55212	6.95331	5.0775	5.43564	5.6639	3.54953
										6.25	4.43254	4.85401	7.12748	5.29316	5.71453	5.61109	3.885
										6.5	4.29004	4.80747	6.91437	5.11667	5.3648	5.62709	3.68712
										6.75	4.31732	4.90462	6.66732	5.13945	5.66928	5.63948	3.68712
										7	4.52029	5.13233	6.98974	5.20836	5.58216	5.58557	3.62992
										7.25	4.50263	5.34311	7.03941	5.41555	6.03536	5.6844	3.83246
										7.5	4.79138	5.08308	7.33569	5.57236	6.01939	6.05619	4.29005
										7.75	4.71504	5.43585	7.72458	5.62593	6.15802	5.91595	3.75362
										8	4.85583	5.54548	7.56018	5.47887	6.13989	6.07489	3.77371
										8.25	5.22417	5.69285	7.45231	5.66294	6.1919	5.85067	3.69178
										8.5	5.37731	5.86689	7.92517	5.70575	6.44126	6.2593	3.45217
										8.75	5.56952	6.18358	7.78014	5.72964	7.04002	6.47873	3.73969
										9	6.19769	6.70477	8.41791	5.78293	7.46032	6.89973	3.52789
										9.25	6.83887	7.40604	8.72373	6.12439	7.94485	7.02412	3.73043
										9.5	7.25742	7.77464	8.86135	6.41458	8.47957	7.46705	3.38568
										9.75	7.50569	8.55682	9.49924	7.11582	8.72897	7.77299	3.78915
										10	7.75696	8.43373	9.92983	7.44695	8.82115	7.8701	3.32693
										10.25	8.37639	8.94977	10.238	8.19217	9.79853	8.22122	3.47069
										10.5	9.15443	9.37678	10.5284	8.45483	10.9061	8.58611	3.50008
										10.75	10.7944	11.0735	11.1487	9.00062	13.2697	9.9535	3.4614
										11	12.773	12.7073	11.6406	9.32928	15.4818	11.5647	3.17233
										11.25	16.4004	16.2464	13.0952	10.3286	18.9932	14.5174	3.15687
										11.5	20.1812	21.0278	15.6654	12.4849	24.0304	18.6017	3.42278
										11.75	25.2732	25.7144	19.5968	15.6387	29.4001	23.8852	3.19552
										12	30.3043	30.1777	24.0511	19.5656	33.9703	28.5967	3.1986
										12.25	35.4489	35.5217	29.629	24.1843	39.4907	34.1156	3.26044
										12.5	40.6762	39.729	35.1237	29.3735	43.9997	39.5209	2.92343
										12.75	45.5774	44.9592	41.0464	34.7396	48.5421	44.1354	3.31301
										13	50.9596	49.405	46.9781	40.0334	52.8402	48.9963	3.23571
										13.25	54.9291	54.1246	52.6839	44.8515	57.206	53.773	3.02082
										13.5	59.0033	57.8263	57.2687	50.0625	61.026	58.0581	3.06719
										13.75	62.8258	61.8831	61.6585	54.2036	65.0109	61.7839	2.94198
										14	65.9851	65.6791	65.425	58.5397	68.541	65.326	2.80748
										14.25	69.1639	69.0867	69.0393	62.243	71.3229	68.8451	2.98526
										14.5	72.7094	72.1257	72.6423	66.3822	74.2556	72.4142	2.88941
										14.75	75.2504	74.8925	75.3542	69.1968	76.475	75.0628	2.73481
										15	77.5002	77.244	78.2362	72.7228	78.8716	77.4243	2.56941
										15.25	80.1671	79.5312	80.7085	75.5993	81.2288	80.2183	2.37462
										15.5	81.7002	81.3113	83.3642	78.8205	83.6739	82.1863	2.53693
										15.75	84.6475	83.5743	85.141	81.291	85.2988	84.4628	2.62661
										16	85.8542	84.6279	86.6329	82.4598	86.4712	86.0961	2.53385
										16.25	88.0157	86.8115	88.5693	85.0769	88.2513	88.1222	2.53848
										16.5	89.0279	87.9458	89.6375	87.0426	89.893	89.4663	2.707
										16.75	90.3911	89.032	90.5184	87.9886	90.933	90.81	2.34986
										17	91.3107	90.4517	92.3926	89.2939	91.7467	91.5645	2.79047
										17.25	92.6539	91.5478	93.5057	90.833	92.4361	92.9016	2.51529
										17.5	93.147	92.1738	93.8616	91.6766	94.3215	94.1658	2.55703
										17.75	93.7414	92.6773	93.9053	91.9936	94.9982	94.5065	2.46118
										18	93.9451	93.9089	94.9514	93.0679	94.9015	95.0332	2.09015
										18.25	95.4332	94.9122	95.5682	93.7934	95.7774	95.4459	2.17671
										18.5	96.211	95.5231	96.4573	94.8502	96.0433	95.8116	2.20456
										18.75	96.4745	96.4469	96.9702	95.0085	96.2738	96.6941	2.0917
										19	96.91	96.9349	97.1858	95.9602	96.6949	97.2663	1.93401
										19.25	97.5407	97.1168	97.8278	96.3609	97.3248	97.2713	2.02986
										19.5	97.0476	96.987	97.9184	96.4059	97.4057	96.757	2.05768
										19.75	96.9341	97.3967	97.0795	96.6007	97.6733	97.0242	1.99121
										20	98.0351	98.2601	98.2601	97.8497	98.1115	97.4999	1.90771
										20.25	98.6878	98.9095	98.7756	98.3951	98.7837	98.2125	2.2633
										20.5	98.518	98.5469	98.1696	97.8111	98.3462	98.1366	2.02986
										20.75	98.5482	98.2458	98.0556	98.7206	99.2754	98.5246	2.03758
										21	99.0743	99.2025	98.1456	98.3722	98.6047	98.5593	2.01594
										21.25	98.6367	98.4372	98.7057	98.283	98.7691	98.6214	2.17054
										21.5	98.3417	98.5236	98.1372	98.8084	98.9296	98.9036	2.05305
										21.75	97.9381	98.3483	98.736	99.2789	99.8358	99.3007	1.97575
										22	97.8015	97.6925	98.6759	98.9631	98.2331	98.5175	1.91854
										22.25	98.11	98.2624	99.0858	99.4533	99.4178	99.29	2.03604
										22.5	98.0511	98.608	98.1204	98.4328	98.6707	98.4882	1.97883
										22.75	99.6109	100	99.2096	99.2275	98.8749	99.1912	1.79797
										23	98.7227	98.8397	98.8105	99.0528	99.1207	98.6461	1.93555
										23.25	99.0408	99.2853	99.0598	99.5528	99.3781	99.1985	1.82578
										23.5	98.8226	99.1247	98.5501	99.0165	99.0223	99.441	1.67581
										23.75	98.5792	99.3564	98.6667	99.0441	97.9819	98.9098	1.60781
										24	97.9742	99.2742	98.6132	98.4086	99.0344	98.4658	1.61089
										24.25	98.3593	99.265	98.72	99.0984	98.6932	98.7562	1.78559
